# Supplementary material
Source: publisher site journal article supplement (https://www.dovepress.com/article/422189)
Supplement: Supplementary file 1 [file get_supplementary_file.php]

# Supplementary Material

## Integrated Analysis of Immune Infiltration and Hub Pyroptosis-related Genes for Multiple Sclerosis

|                                                                                                                                      |     |
|--------------------------------------------------------------------------------------------------------------------------------------|-----|
| Figure S1. Identified differentially expressed pyroptosis-related genes (DPRGs).....                                                 | 2   |
| Figure S2. The expression level of differentially expressed pyroptosis-related genes in the training and the validation dataset..... | 3   |
| Table S1. 33 Pyroptosis-related genes from literature.....                                                                           | 4   |
| Table S2. Target miRNA of CASP4 from miRWalk.....                                                                                    | 5   |
| Table S3. Target miRNA of CASP4 from miRNet.....                                                                                     | 136 |
| Table S4. Target miRNA of NLRC4 from miRWalk.....                                                                                    | 138 |
| Table S5. Target miRNA of NLRC4 from miRNet.....                                                                                     | 388 |
| Table S6. LncRNA-miRNA-mRNA for CASP4 and NLRC4.....                                                                                 | 389 |

**Figure S1. Identified differentially expressed pyroptosis-related genes (DPRGs).**

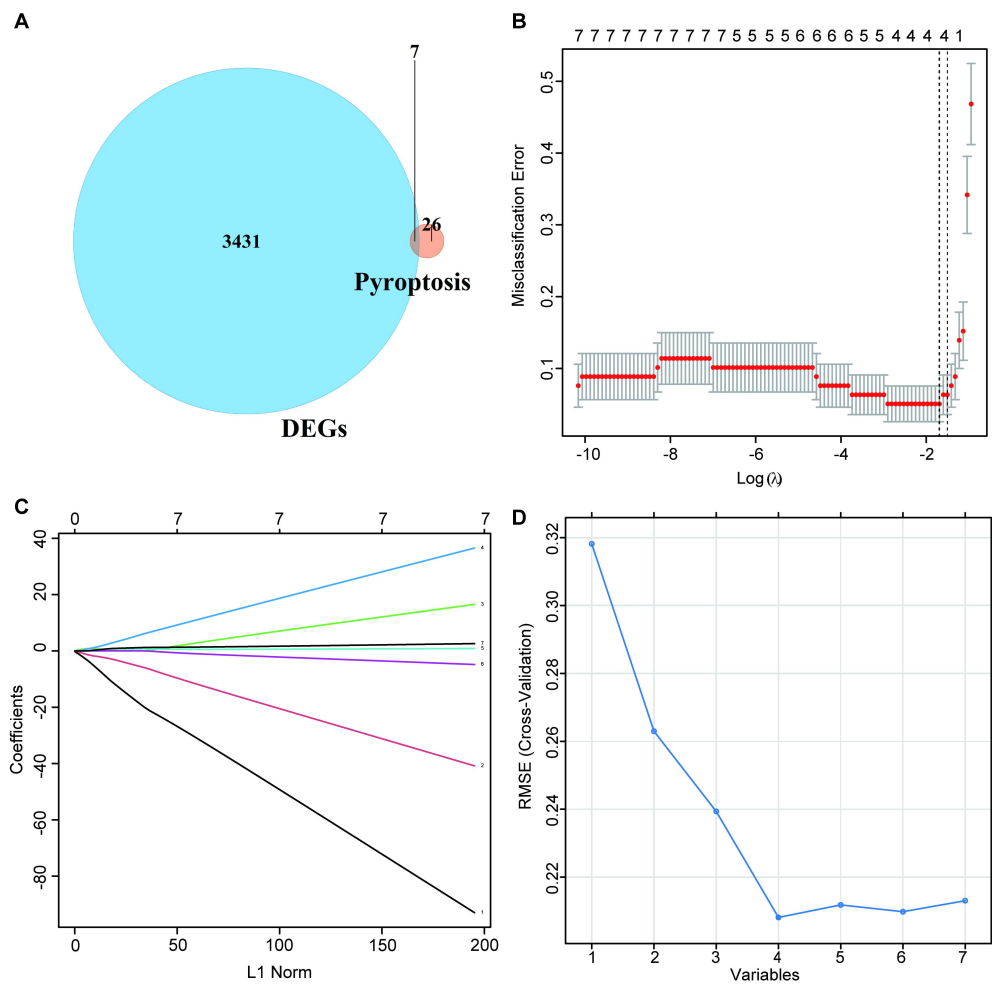

**Figure S1.** Identified differentially expressed pyroptosis-related genes (DPRGs). (A) Venn diagram analysis showed that the overlap of differentially expressed genes and 33 pyroptosis-related genes led to seven DPRGs being identified. (B) Cross-validation for tuning parameter selection in the LASSO (least absolute shrinkage and selection operator) model. The cross-validation error was minimal when five genes were selected. (C) LASSO coefficient profiles of the seven DPRGs. (D) Bouts of cross-validation error was minimal when four DPRGs were selected by SVM-RFE (support vector machine recursive feature elimination) algorithms.

**Figure S2. The expression level of differentially expressed pyroptosis-related genes in the training and the validation dataset.**

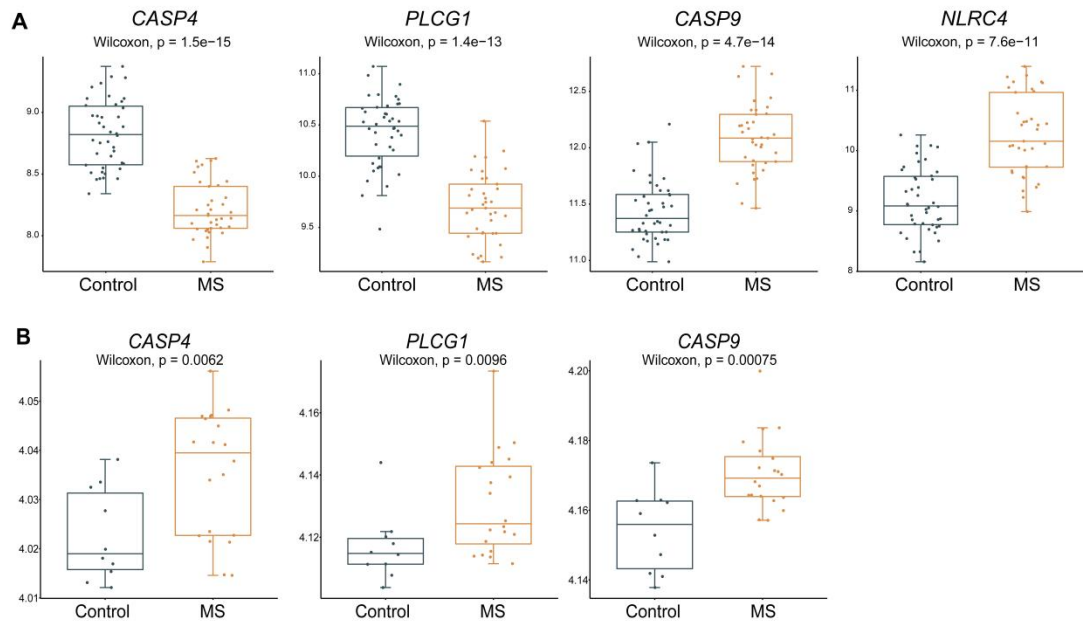

**Figure S2.** The expression level of differentially expressed pyroptosis-related genes in the training and the validation dataset. (A) The expression level of *CASP4*, *PLCG1*, *CASP9* and *NLRC4* in the training set (GSE131282 microarray). In brain tissues, there tended to be high variability of gene expression in different areas. Moreover, postmortem interval affects the RNA levels and integrity which could be accountable for the lower expression of *CASP4* even though occurred pyroptosis. (B) The expression level of *CASP4*, *PLCG1* and *CASP9* in the validation set (GSE135511 microarray). The missing of *NLRC4* probe in the GSE135511 dataset led to absence of *NLRC4* signal. The expression trends of *CASP4* and *PLCG1* were different in GSE131282 and GSE135511 presumably due to sample volume or sample handling in GSE135511. As such, to better simulate real expression of these genes, we validated their expression level of mRNA in EAE models.

**Table S1. 33 Pyroptosis-related genes from literature.**

| Genes  | NCBI-GeneID | Official Full Name                                     |
|--------|-------------|--------------------------------------------------------|
| AIM2   | 9447        | absent in melanoma 2                                   |
| CASP1  | 834         | caspase 1                                              |
| CASP3  | 836         | caspase 3                                              |
| CASP4  | 837         | caspase 4                                              |
| CASP5  | 838         | caspase 5                                              |
| CASP6  | 839         | caspase 6                                              |
| CASP8  | 841         | caspase 8                                              |
| CASP9  | 842         | caspase 9                                              |
| ELANE  | 1991        | elastase, neutrophil expressed                         |
| GPX4   | 2879        | glutathione peroxidase 4                               |
| GSDMA  | 284110      | gasdermin A                                            |
| GSDMB  | 55876       | gasdermin B                                            |
| GSDMC  | 56169       | gasdermin C                                            |
| GSDMD  | 79792       | gasdermin D                                            |
| GSDME  | 1687        | gasdermin E                                            |
| IL18   | 3606        | interleukin 18                                         |
| IL1B   | 3553        | interleukin 1 beta                                     |
| IL6    | 3569        | interleukin 6                                          |
| NLRC4  | 58484       | NLR family CARD domain containing 4                    |
| NLRP1  | 22861       | NLR family pyrin domain containing 1                   |
| NLRP2  | 55655       | NLR family pyrin domain containing 2                   |
| NLRP3  | 114548      | NLR family pyrin domain containing 3                   |
| NLRP6  | 171389      | NLR family pyrin domain containing 6                   |
| NLRP7  | 199713      | NLR family pyrin domain containing 7                   |
| NOD1   | 10392       | nucleotide binding oligomerization domain containing 1 |
| NOD2   | 64127       | nucleotide binding oligomerization domain containing 2 |
| PJVK   | 494513      | pejvakin                                               |
| PLCG1  | 5335        | phospholipase C gamma 1                                |
| PRKACA | 5566        | protein kinase cAMP-activated catalytic subunit alpha  |
| PYCARD | 29108       | PYD and CARD domain containing                         |
| SCAF11 | 9169        | SR-related CTD associated factor 11                    |
| TIRAP  | 114609      | TIR domain containing adaptor protein                  |
| TNF    | 7124        | tumor necrosis factor                                  |

**Table S2.Target miRNA of CASP4 from miRWalk.**

| mirnaid          | refseqid  | genesymbol | accessibility | position |
|------------------|-----------|------------|---------------|----------|
| hsa-let-7a-5p    | NM_033306 | CASP4      | 0.01506736    | CDS      |
| hsa-let-7a-2-3p  | NM_033306 | CASP4      | 0.001021701   | CDS      |
| hsa-let-7b-5p    | NM_033306 | CASP4      | 0.01506736    | CDS      |
| hsa-let-7b-5p    | NM_033306 | CASP4      | 0.004304008   | CDS      |
| hsa-let-7c-5p    | NM_033306 | CASP4      | 0.01506736    | CDS      |
| hsa-let-7c-5p    | NM_033306 | CASP4      | 0.04654808    | CDS      |
| hsa-let-7d-5p    | NM_033306 | CASP4      | 0.1524418     | CDS      |
| hsa-let-7e-5p    | NM_033306 | CASP4      | 0.01506736    | CDS      |
| hsa-let-7e-5p    | NM_033306 | CASP4      | 0.001057457   | CDS      |
| hsa-let-7f-5p    | NM_033306 | CASP4      | 0.004269467   | CDS      |
| hsa-let-7f-2-3p  | NM_033306 | CASP4      | 0.08581254    | CDS      |
| hsa-miR-15a-5p   | NM_033306 | CASP4      | 0.006381234   | CDS      |
| hsa-miR-15a-3p   | NM_033306 | CASP4      | 1.84E-05      | 5UTR     |
| hsa-miR-16-5p    | NM_033306 | CASP4      | 0.006381234   | CDS      |
| hsa-miR-18a-3p   | NM_033306 | CASP4      | 0.000188063   | CDS      |
| hsa-miR-18a-3p   | NM_033306 | CASP4      | 9.07E-06      | CDS      |
| hsa-miR-19a-5p   | NM_033306 | CASP4      | 0.01629919    | CDS      |
| hsa-miR-19b-1-5p | NM_033306 | CASP4      | 0.001427036   | CDS      |
| hsa-miR-19b-1-5p | NM_033306 | CASP4      | 0.0002477     | CDS      |
| hsa-miR-19b-2-5p | NM_033306 | CASP4      | 0.0002477     | CDS      |
| hsa-miR-21-3p    | NM_033306 | CASP4      | 0.00089507    | 5UTR     |
| hsa-miR-21-3p    | NM_033306 | CASP4      | 0.000725302   | 5UTR     |
| hsa-miR-22-5p    | NM_033306 | CASP4      | 0.00059852    | CDS      |
| hsa-miR-23a-5p   | NM_033306 | CASP4      | 0.00080334    | CDS      |
| hsa-miR-23a-5p   | NM_033306 | CASP4      | 3.80E-05      | CDS      |
| hsa-miR-23a-3p   | NM_033306 | CASP4      | 0.001173278   | 5UTR     |
| hsa-miR-23a-3p   | NM_033306 | CASP4      | 0.008560229   | CDS      |
| hsa-miR-24-3p    | NM_033306 | CASP4      | 0.0183131     | 5UTR     |
| hsa-miR-25-3p    | NM_033306 | CASP4      | 5.83E-05      | CDS      |
| hsa-miR-26a-1-3p | NM_033306 | CASP4      | 0.000515943   | CDS      |
| hsa-miR-26b-3p   | NM_033306 | CASP4      | 0.007606361   | CDS      |
| hsa-miR-26b-3p   | NM_033306 | CASP4      | 0.001910621   | CDS      |
| hsa-miR-27a-3p   | NM_033306 | CASP4      | 0.01403179    | CDS      |
| hsa-miR-28-3p    | NM_033306 | CASP4      | 0.001474321   | CDS      |
| hsa-miR-29a-5p   | NM_033306 | CASP4      | 0.007606361   | CDS      |
| hsa-miR-30a-5p   | NM_033306 | CASP4      | 0.1026343     | CDS      |
| hsa-miR-30a-3p   | NM_033306 | CASP4      | 0.00017599    | CDS      |
| hsa-miR-92a-1-5p | NM_033306 | CASP4      | 0.006538049   | CDS      |
| hsa-miR-92a-3p   | NM_033306 | CASP4      | 5.83E-05      | CDS      |
| hsa-miR-92a-2-5p | NM_033306 | CASP4      | 0.01469811    | CDS      |
| hsa-miR-93-5p    | NM_033306 | CASP4      | 0.006830788   | 5UTR     |
| hsa-miR-93-3p    | NM_033306 | CASP4      | 0.01462679    | CDS      |

|                  |           |       |             |      |
|------------------|-----------|-------|-------------|------|
| hsa-miR-95-3p    | NM_033306 | CASP4 | 0.008948377 | CDS  |
| hsa-miR-96-3p    | NM_033306 | CASP4 | 0.003858073 | CDS  |
| hsa-miR-96-3p    | NM_033306 | CASP4 | 1.59E-05    | CDS  |
| hsa-miR-98-5p    | NM_033306 | CASP4 | 0.01506736  | CDS  |
| hsa-miR-99a-5p   | NM_033306 | CASP4 | 0.000188063 | CDS  |
| hsa-miR-99a-3p   | NM_033306 | CASP4 | 0.000725653 | CDS  |
| hsa-miR-100-5p   | NM_033306 | CASP4 | 9.14E-06    | 5UTR |
| hsa-miR-29b-1-5p | NM_033306 | CASP4 | 0.01082276  | CDS  |
| hsa-miR-29b-2-5p | NM_033306 | CASP4 | 0.001889164 | 5UTR |
| hsa-miR-103a-3p  | NM_033306 | CASP4 | 0.006381234 | CDS  |
| hsa-miR-105-5p   | NM_033306 | CASP4 | 0.001561664 | CDS  |
| hsa-miR-106a-3p  | NM_033306 | CASP4 | 0.00135485  | CDS  |
| hsa-miR-107      | NM_033306 | CASP4 | 0.006381234 | CDS  |
| hsa-miR-107      | NM_033306 | CASP4 | 0.1249703   | 5UTR |
| hsa-miR-197-5p   | NM_033306 | CASP4 | 0.02762239  | CDS  |
| hsa-miR-197-3p   | NM_033306 | CASP4 | 0.005475725 | CDS  |
| hsa-miR-198      | NM_033306 | CASP4 | 0.000887313 | CDS  |
| hsa-miR-198      | NM_033306 | CASP4 | 0.00293118  | CDS  |
| hsa-miR-199a-5p  | NM_033306 | CASP4 | 2.55E-06    | CDS  |
| hsa-miR-208a-5p  | NM_033306 | CASP4 | 5.42E-05    | CDS  |
| hsa-miR-129-5p   | NM_033306 | CASP4 | 3.17E-07    | CDS  |
| hsa-miR-129-5p   | NM_033306 | CASP4 | 0.000637219 | 3UTR |
| hsa-miR-30c-2-3p | NM_033306 | CASP4 | 0.02723061  | CDS  |
| hsa-miR-139-5p   | NM_033306 | CASP4 | 0.000293966 | CDS  |
| hsa-miR-139-5p   | NM_033306 | CASP4 | 0.01501671  | CDS  |
| hsa-miR-139-3p   | NM_033306 | CASP4 | 5.42E-05    | CDS  |
| hsa-miR-139-3p   | NM_033306 | CASP4 | 0.000218895 | CDS  |
| hsa-miR-147a     | NM_033306 | CASP4 | 0.005709682 | CDS  |
| hsa-miR-10b-3p   | NM_033306 | CASP4 | 0.000137537 | CDS  |
| hsa-miR-34a-5p   | NM_033306 | CASP4 | 0.000449296 | CDS  |
| hsa-miR-181b-5p  | NM_033306 | CASP4 | 0.03595607  | CDS  |
| hsa-miR-181c-3p  | NM_033306 | CASP4 | 0.001474321 | CDS  |
| hsa-miR-182-5p   | NM_033306 | CASP4 | 0.001229686 | CDS  |
| hsa-miR-183-3p   | NM_033306 | CASP4 | 0.01359137  | 5UTR |
| hsa-miR-205-5p   | NM_033306 | CASP4 | 0.01515751  | CDS  |
| hsa-miR-205-5p   | NM_033306 | CASP4 | 0.003929355 | CDS  |
| hsa-miR-211-3p   | NM_033306 | CASP4 | 0.009509266 | 5UTR |
| hsa-miR-211-3p   | NM_033306 | CASP4 | 7.93E-05    | 5UTR |
| hsa-miR-212-5p   | NM_033306 | CASP4 | 2.55E-06    | CDS  |
| hsa-miR-212-3p   | NM_033306 | CASP4 | 0.000428925 | CDS  |
| hsa-miR-214-3p   | NM_033306 | CASP4 | 0.002009155 | 5UTR |
| hsa-miR-215-3p   | NM_033306 | CASP4 | 0.000316211 | 5UTR |
| hsa-miR-216a-5p  | NM_033306 | CASP4 | 0.000907136 | CDS  |
| hsa-miR-216a-3p  | NM_033306 | CASP4 | 0.03273765  | CDS  |

|                   |           |       |             |      |
|-------------------|-----------|-------|-------------|------|
| hsa-miR-217-3p    | NM_033306 | CASP4 | 2.09E-05    | CDS  |
| hsa-miR-218-1-3p  | NM_033306 | CASP4 | 0.002731967 | 5UTR |
| hsa-miR-221-5p    | NM_033306 | CASP4 | 0.003441311 | CDS  |
| hsa-miR-221-3p    | NM_033306 | CASP4 | 0.007399047 | CDS  |
| hsa-miR-222-3p    | NM_033306 | CASP4 | 0.01194194  | CDS  |
| hsa-let-7g-5p     | NM_033306 | CASP4 | 0.01506736  | CDS  |
| hsa-let-7i-5p     | NM_033306 | CASP4 | 0.07629977  | CDS  |
| hsa-let-7i-5p     | NM_033306 | CASP4 | 0.01128548  | CDS  |
| hsa-let-7i-5p     | NM_033306 | CASP4 | 0.04226006  | CDS  |
| hsa-let-7i-3p     | NM_033306 | CASP4 | 0.2003249   | 3UTR |
| hsa-miR-15b-5p    | NM_033306 | CASP4 | 0.006381234 | CDS  |
| hsa-miR-23b-3p    | NM_033306 | CASP4 | 0.001173278 | 5UTR |
| hsa-miR-23b-3p    | NM_033306 | CASP4 | 0.008560229 | CDS  |
| hsa-miR-27b-3p    | NM_033306 | CASP4 | 0.001537915 | 5UTR |
| hsa-miR-30b-3p    | NM_033306 | CASP4 | 0.000604446 | CDS  |
| hsa-miR-30b-3p    | NM_033306 | CASP4 | 0.02723061  | CDS  |
| hsa-miR-122-5p    | NM_033306 | CASP4 | 4.34E-05    | CDS  |
| hsa-miR-124-3p    | NM_033306 | CASP4 | 0.000511411 | 5UTR |
| hsa-miR-125b-1-3p | NM_033306 | CASP4 | 0.02761587  | CDS  |
| hsa-miR-125b-1-3p | NM_033306 | CASP4 | 5.42E-05    | CDS  |
| hsa-miR-125b-1-3p | NM_033306 | CASP4 | 0.00293118  | CDS  |
| hsa-miR-130a-3p   | NM_033306 | CASP4 | 0.002095427 | CDS  |
| hsa-miR-132-5p    | NM_033306 | CASP4 | 0.006994664 | CDS  |
| hsa-miR-132-5p    | NM_033306 | CASP4 | 0.002877047 | CDS  |
| hsa-miR-133a-3p   | NM_033306 | CASP4 | 0.002990015 | CDS  |
| hsa-miR-135a-3p   | NM_033306 | CASP4 | 7.93E-05    | 5UTR |
| hsa-miR-135a-3p   | NM_033306 | CASP4 | 0.01004367  | CDS  |
| hsa-miR-135a-2-3p | NM_033306 | CASP4 | 1.17E-07    | 5UTR |
| hsa-miR-137-5p    | NM_033306 | CASP4 | 0.01800674  | CDS  |
| hsa-miR-138-5p    | NM_033306 | CASP4 | 0.0218458   | 3UTR |
| hsa-miR-140-5p    | NM_033306 | CASP4 | 0.08242333  | 5UTR |
| hsa-miR-140-3p    | NM_033306 | CASP4 | 1.00E-05    | CDS  |
| hsa-miR-141-5p    | NM_033306 | CASP4 | 0.141785    | 5UTR |
| hsa-miR-141-3p    | NM_033306 | CASP4 | 0.03266314  | CDS  |
| hsa-miR-142-5p    | NM_033306 | CASP4 | 0.000536431 | CDS  |
| hsa-miR-143-5p    | NM_033306 | CASP4 | 0.000427688 | CDS  |
| hsa-miR-143-5p    | NM_033306 | CASP4 | 0.007399047 | CDS  |
| hsa-miR-143-5p    | NM_033306 | CASP4 | 0.000248963 | CDS  |
| hsa-miR-145-5p    | NM_033306 | CASP4 | 0.00275918  | CDS  |
| hsa-miR-145-5p    | NM_033306 | CASP4 | 0.00131835  | CDS  |
| hsa-miR-145-5p    | NM_033306 | CASP4 | 0.000127802 | CDS  |
| hsa-miR-152-5p    | NM_033306 | CASP4 | 0.0151755   | CDS  |
| hsa-miR-152-3p    | NM_033306 | CASP4 | 8.25E-06    | CDS  |
| hsa-miR-153-5p    | NM_033306 | CASP4 | 0.002279852 | CDS  |

|                   |           |       |             |      |
|-------------------|-----------|-------|-------------|------|
| hsa-miR-191-3p    | NM_033306 | CASP4 | 0.000353786 | CDS  |
| hsa-miR-125a-3p   | NM_033306 | CASP4 | 0.009509266 | 5UTR |
| hsa-miR-125b-2-3p | NM_033306 | CASP4 | 5.00E-05    | CDS  |
| hsa-miR-127-5p    | NM_033306 | CASP4 | 0.003428258 | CDS  |
| hsa-miR-127-5p    | NM_033306 | CASP4 | 0.002303406 | CDS  |
| hsa-miR-134-5p    | NM_033306 | CASP4 | 0.000164883 | CDS  |
| hsa-miR-146a-3p   | NM_033306 | CASP4 | 5.70E-05    | CDS  |
| hsa-miR-149-5p    | NM_033306 | CASP4 | 0.007606361 | CDS  |
| hsa-miR-149-5p    | NM_033306 | CASP4 | 0.000860321 | CDS  |
| hsa-miR-149-3p    | NM_033306 | CASP4 | 0.006369709 | CDS  |
| hsa-miR-150-3p    | NM_033306 | CASP4 | 0.0001889   | 5UTR |
| hsa-miR-150-3p    | NM_033306 | CASP4 | 1.81E-05    | CDS  |
| hsa-miR-154-5p    | NM_033306 | CASP4 | 0.09078461  | 5UTR |
| hsa-miR-154-5p    | NM_033306 | CASP4 | 0.007276623 | 5UTR |
| hsa-miR-185-5p    | NM_033306 | CASP4 | 1.16E-05    | CDS  |
| hsa-miR-185-3p    | NM_033306 | CASP4 | 0.000142782 | CDS  |
| hsa-miR-188-3p    | NM_033306 | CASP4 | 0.01501671  | CDS  |
| hsa-miR-188-3p    | NM_033306 | CASP4 | 0.00307967  | CDS  |
| hsa-miR-193a-5p   | NM_033306 | CASP4 | 4.32E-05    | CDS  |
| hsa-miR-193a-3p   | NM_033306 | CASP4 | 1.38E-05    | CDS  |
| hsa-miR-194-5p    | NM_033306 | CASP4 | 0.000428925 | CDS  |
| hsa-miR-195-5p    | NM_033306 | CASP4 | 0.006381234 | CDS  |
| hsa-miR-195-3p    | NM_033306 | CASP4 | 0.175446    | 3UTR |
| hsa-miR-206       | NM_033306 | CASP4 | 0.01445031  | CDS  |
| hsa-miR-320a-5p   | NM_033306 | CASP4 | 0.005475725 | CDS  |
| hsa-miR-320a-3p   | NM_033306 | CASP4 | 0.0218458   | CDS  |
| hsa-miR-200c-5p   | NM_033306 | CASP4 | 5.86E-05    | CDS  |
| hsa-miR-200c-3p   | NM_033306 | CASP4 | 0.003042605 | CDS  |
| hsa-miR-194-3p    | NM_033306 | CASP4 | 0.00098523  | 5UTR |
| hsa-miR-106b-3p   | NM_033306 | CASP4 | 0.000127802 | CDS  |
| hsa-miR-106b-3p   | NM_033306 | CASP4 | 0.01849425  | CDS  |
| hsa-miR-29c-5p    | NM_033306 | CASP4 | 0.004891425 | CDS  |
| hsa-miR-30c-1-3p  | NM_033306 | CASP4 | 0.005953452 | 3UTR |
| hsa-miR-299-3p    | NM_033306 | CASP4 | 0.03305347  | CDS  |
| hsa-miR-301a-5p   | NM_033306 | CASP4 | 0.02147881  | CDS  |
| hsa-miR-99b-3p    | NM_033306 | CASP4 | 0.01017319  | CDS  |
| hsa-miR-99b-3p    | NM_033306 | CASP4 | 0.009782782 | CDS  |
| hsa-miR-296-5p    | NM_033306 | CASP4 | 0.000141499 | CDS  |
| hsa-miR-296-3p    | NM_033306 | CASP4 | 0.005208109 | CDS  |
| hsa-miR-296-3p    | NM_033306 | CASP4 | 0.002868814 | CDS  |
| hsa-miR-296-3p    | NM_033306 | CASP4 | 0.02114427  | CDS  |
| hsa-miR-130b-5p   | NM_033306 | CASP4 | 0.000605186 | CDS  |
| hsa-miR-130b-3p   | NM_033306 | CASP4 | 0.03971412  | CDS  |
| hsa-miR-130b-3p   | NM_033306 | CASP4 | 0.000647898 | CDS  |



|                 |           |       |             |      |
|-----------------|-----------|-------|-------------|------|
| hsa-miR-30e-5p  | NM_033306 | CASP4 | 0.1026343   | CDS  |
| hsa-miR-361-5p  | NM_033306 | CASP4 | 0.001777808 | 5UTR |
| hsa-miR-361-3p  | NM_033306 | CASP4 | 1.97E-05    | CDS  |
| hsa-miR-363-5p  | NM_033306 | CASP4 | 0.01348408  | 5UTR |
| hsa-miR-365a-5p | NM_033306 | CASP4 | 0.001637462 | CDS  |
| hsa-miR-365a-5p | NM_033306 | CASP4 | 0.000526877 | CDS  |
| hsa-miR-365a-5p | NM_033306 | CASP4 | 8.66E-05    | CDS  |
| hsa-miR-365b-5p | NM_033306 | CASP4 | 0.000781748 | CDS  |
| hsa-miR-365b-5p | NM_033306 | CASP4 | 0.001637462 | CDS  |
| hsa-miR-302b-3p | NM_033306 | CASP4 | 0.000142782 | CDS  |
| hsa-miR-302c-3p | NM_033306 | CASP4 | 0.006994664 | CDS  |
| hsa-miR-302c-3p | NM_033306 | CASP4 | 0.00017934  | CDS  |
| hsa-miR-302d-3p | NM_033306 | CASP4 | 0.00017934  | CDS  |
| hsa-miR-370-5p  | NM_033306 | CASP4 | 0.000781748 | CDS  |
| hsa-miR-370-3p  | NM_033306 | CASP4 | 0.000860321 | CDS  |
| hsa-miR-372-5p  | NM_033306 | CASP4 | 9.44E-06    | CDS  |
| hsa-miR-373-3p  | NM_033306 | CASP4 | 0.000689104 | 3UTR |
| hsa-miR-373-3p  | NM_033306 | CASP4 | 9.96E-05    | CDS  |
| hsa-miR-376a-5p | NM_033306 | CASP4 | 0.00011745  | CDS  |
| hsa-miR-376a-5p | NM_033306 | CASP4 | 0.000547919 | CDS  |
| hsa-miR-377-5p  | NM_033306 | CASP4 | 8.44E-05    | CDS  |
| hsa-miR-377-5p  | NM_033306 | CASP4 | 0.00202915  | 5UTR |
| hsa-miR-378a-5p | NM_033306 | CASP4 | 0.000922214 | CDS  |
| hsa-miR-381-5p  | NM_033306 | CASP4 | 0.000618857 | CDS  |
| hsa-miR-382-5p  | NM_033306 | CASP4 | 0.005791904 | CDS  |
| hsa-miR-328-5p  | NM_033306 | CASP4 | 0.003023611 | 5UTR |
| hsa-miR-328-5p  | NM_033306 | CASP4 | 0.001893298 | CDS  |
| hsa-miR-328-3p  | NM_033306 | CASP4 | 0.004080075 | CDS  |
| hsa-miR-342-5p  | NM_033306 | CASP4 | 0.02114427  | CDS  |
| hsa-miR-337-5p  | NM_033306 | CASP4 | 1.44E-07    | 5UTR |
| hsa-miR-323a-5p | NM_033306 | CASP4 | 8.84E-05    | CDS  |
| hsa-miR-151a-5p | NM_033306 | CASP4 | 0.000172777 | CDS  |
| hsa-miR-151a-3p | NM_033306 | CASP4 | 0.001474321 | CDS  |
| hsa-miR-151a-3p | NM_033306 | CASP4 | 0.00134163  | 3UTR |
| hsa-miR-135b-5p | NM_033306 | CASP4 | 0.000797533 | CDS  |
| hsa-miR-135b-3p | NM_033306 | CASP4 | 0.000246147 | 5UTR |
| hsa-miR-148b-5p | NM_033306 | CASP4 | 0.01629919  | CDS  |
| hsa-miR-324-5p  | NM_033306 | CASP4 | 0.000131593 | CDS  |
| hsa-miR-324-3p  | NM_033306 | CASP4 | 9.07E-06    | CDS  |
| hsa-miR-338-3p  | NM_033306 | CASP4 | 0.000953216 | 5UTR |
| hsa-miR-338-3p  | NM_033306 | CASP4 | 0.1284782   | 5UTR |
| hsa-miR-339-5p  | NM_033306 | CASP4 | 0.000155947 | CDS  |
| hsa-miR-133b    | NM_033306 | CASP4 | 0.002990015 | CDS  |
| hsa-miR-325     | NM_033306 | CASP4 | 0.000860321 | CDS  |

|                 |           |       |             |      |
|-----------------|-----------|-------|-------------|------|
| hsa-miR-345-5p  | NM_033306 | CASP4 | 0.01082276  | CDS  |
| hsa-miR-346     | NM_033306 | CASP4 | 0.000386263 | CDS  |
| hsa-miR-196b-5p | NM_033306 | CASP4 | 9.29E-05    | CDS  |
| hsa-miR-423-5p  | NM_033306 | CASP4 | 0.001482999 | CDS  |
| hsa-miR-423-3p  | NM_033306 | CASP4 | 0.000309971 | CDS  |
| hsa-miR-425-3p  | NM_033306 | CASP4 | 0.04080268  | CDS  |
| hsa-miR-20b-5p  | NM_033306 | CASP4 | 0.000125909 | CDS  |
| hsa-miR-20b-3p  | NM_033306 | CASP4 | 0.000221888 | CDS  |
| hsa-miR-449a    | NM_033306 | CASP4 | 0.01597706  | CDS  |
| hsa-miR-431-5p  | NM_033306 | CASP4 | 3.17E-07    | CDS  |
| hsa-miR-431-3p  | NM_033306 | CASP4 | 0.01348408  | 5UTR |
| hsa-miR-431-3p  | NM_033306 | CASP4 | 0.00202915  | 5UTR |
| hsa-miR-329-5p  | NM_033306 | CASP4 | 0.01128763  | 5UTR |
| hsa-miR-329-5p  | NM_033306 | CASP4 | 0.00080334  | CDS  |
| hsa-miR-412-3p  | NM_033306 | CASP4 | 0.000335791 | CDS  |
| hsa-miR-410-5p  | NM_033306 | CASP4 | 0.2188127   | CDS  |
| hsa-miR-410-5p  | NM_033306 | CASP4 | 0.00202915  | 5UTR |
| hsa-miR-376b-5p | NM_033306 | CASP4 | 0.0103363   | CDS  |
| hsa-miR-376b-5p | NM_033306 | CASP4 | 0.000131593 | CDS  |
| hsa-miR-483-5p  | NM_033306 | CASP4 | 0.1599246   | 5UTR |
| hsa-miR-484     | NM_033306 | CASP4 | 0.000933448 | CDS  |
| hsa-miR-485-5p  | NM_033306 | CASP4 | 0.000482834 | 5UTR |
| hsa-miR-486-3p  | NM_033306 | CASP4 | 1.41E-05    | CDS  |
| hsa-miR-487a-5p | NM_033306 | CASP4 | 0.000328221 | CDS  |
| hsa-miR-487a-5p | NM_033306 | CASP4 | 0.000530791 | CDS  |
| hsa-miR-488-3p  | NM_033306 | CASP4 | 0.000218895 | CDS  |
| hsa-miR-490-5p  | NM_033306 | CASP4 | 0.000294115 | CDS  |
| hsa-miR-491-5p  | NM_033306 | CASP4 | 0.000215353 | CDS  |
| hsa-miR-491-5p  | NM_033306 | CASP4 | 0.004694639 | 5UTR |
| hsa-miR-491-3p  | NM_033306 | CASP4 | 0.002295539 | CDS  |
| hsa-miR-511-5p  | NM_033306 | CASP4 | 0.002095427 | CDS  |
| hsa-miR-146b-3p | NM_033306 | CASP4 | 8.39E-06    | CDS  |
| hsa-miR-146b-3p | NM_033306 | CASP4 | 0.000578367 | CDS  |
| hsa-miR-202-3p  | NM_033306 | CASP4 | 0.006369709 | 3UTR |
| hsa-miR-432-5p  | NM_033306 | CASP4 | 0.001166167 | 3UTR |
| hsa-miR-432-3p  | NM_033306 | CASP4 | 0.000836616 | CDS  |
| hsa-miR-432-3p  | NM_033306 | CASP4 | 0.001918944 | CDS  |
| hsa-miR-432-3p  | NM_033306 | CASP4 | 0.000318808 | CDS  |
| hsa-miR-494-5p  | NM_033306 | CASP4 | 0.07938423  | CDS  |
| hsa-miR-193b-5p | NM_033306 | CASP4 | 0.003534416 | CDS  |
| hsa-miR-193b-3p | NM_033306 | CASP4 | 1.38E-05    | CDS  |
| hsa-miR-497-5p  | NM_033306 | CASP4 | 0.006381234 | CDS  |
| hsa-miR-497-3p  | NM_033306 | CASP4 | 0.00124429  | CDS  |
| hsa-miR-512-5p  | NM_033306 | CASP4 | 0.006933323 | CDS  |

|                 |           |       |             |      |
|-----------------|-----------|-------|-------------|------|
| hsa-miR-512-3p  | NM_033306 | CASP4 | 0.000125909 | CDS  |
| hsa-miR-512-3p  | NM_033306 | CASP4 | 0.002095427 | CDS  |
| hsa-miR-498-3p  | NM_033306 | CASP4 | 0.000113607 | CDS  |
| hsa-miR-520e-5p | NM_033306 | CASP4 | 0.03937514  | CDS  |
| hsa-miR-520e-3p | NM_033306 | CASP4 | 5.86E-05    | CDS  |
| hsa-miR-515-3p  | NM_033306 | CASP4 | 0.000125909 | CDS  |
| hsa-miR-519e-5p | NM_033306 | CASP4 | 0.00013017  | 5UTR |
| hsa-miR-519e-5p | NM_033306 | CASP4 | 0.009149916 | CDS  |
| hsa-miR-519e-5p | NM_033306 | CASP4 | 0.000259514 | CDS  |
| hsa-miR-520f-5p | NM_033306 | CASP4 | 9.44E-06    | CDS  |
| hsa-miR-520f-3p | NM_033306 | CASP4 | 5.86E-05    | CDS  |
| hsa-miR-520f-3p | NM_033306 | CASP4 | 0.000638659 | 3UTR |
| hsa-miR-519c-5p | NM_033306 | CASP4 | 1.47E-05    | CDS  |
| hsa-miR-526b-3p | NM_033306 | CASP4 | 9.96E-05    | CDS  |
| hsa-miR-519b-5p | NM_033306 | CASP4 | 1.47E-05    | CDS  |
| hsa-miR-525-5p  | NM_033306 | CASP4 | 0.00307967  | CDS  |
| hsa-miR-523-5p  | NM_033306 | CASP4 | 1.47E-05    | CDS  |
| hsa-miR-518f-5p | NM_033306 | CASP4 | 1.47E-05    | CDS  |
| hsa-miR-518f-3p | NM_033306 | CASP4 | 0.002304037 | CDS  |
| hsa-miR-520b-3p | NM_033306 | CASP4 | 5.86E-05    | CDS  |
| hsa-miR-526a-5p | NM_033306 | CASP4 | 1.47E-05    | CDS  |
| hsa-miR-526a-3p | NM_033306 | CASP4 | 0.01661348  | CDS  |
| hsa-miR-520c-5p | NM_033306 | CASP4 | 1.47E-05    | CDS  |
| hsa-miR-520c-3p | NM_033306 | CASP4 | 5.86E-05    | CDS  |
| hsa-miR-518c-5p | NM_033306 | CASP4 | 9.44E-06    | CDS  |
| hsa-miR-524-3p  | NM_033306 | CASP4 | 0.006804399 | CDS  |
| hsa-miR-524-3p  | NM_033306 | CASP4 | 0.000689104 | 3UTR |
| hsa-miR-517-5p  | NM_033306 | CASP4 | 9.44E-06    | CDS  |
| hsa-miR-517a-3p | NM_033306 | CASP4 | 0.003858073 | CDS  |
| hsa-miR-519d-5p | NM_033306 | CASP4 | 0.000271082 | 5UTR |
| hsa-miR-519d-5p | NM_033306 | CASP4 | 0.00307967  | CDS  |
| hsa-miR-519d-3p | NM_033306 | CASP4 | 0.00707833  | CDS  |
| hsa-miR-521     | NM_033306 | CASP4 | 0.000131593 | CDS  |
| hsa-miR-520d-3p | NM_033306 | CASP4 | 0.000581447 | CDS  |
| hsa-miR-520d-3p | NM_033306 | CASP4 | 5.86E-05    | CDS  |
| hsa-miR-520d-3p | NM_033306 | CASP4 | 0.005791904 | CDS  |
| hsa-miR-517b-3p | NM_033306 | CASP4 | 0.003858073 | CDS  |
| hsa-miR-520g-3p | NM_033306 | CASP4 | 0.00707833  | CDS  |
| hsa-miR-520g-3p | NM_033306 | CASP4 | 0.001136672 | CDS  |
| hsa-miR-516b-3p | NM_033306 | CASP4 | 0.000110421 | CDS  |
| hsa-miR-516b-3p | NM_033306 | CASP4 | 0.19092     | 5UTR |
| hsa-miR-518e-5p | NM_033306 | CASP4 | 1.47E-05    | CDS  |
| hsa-miR-518e-3p | NM_033306 | CASP4 | 0.000131593 | CDS  |
| hsa-miR-518a-5p | NM_033306 | CASP4 | 0.000271082 | 5UTR |

|                   |           |       |             |      |
|-------------------|-----------|-------|-------------|------|
| hsa-miR-518d-5p   | NM_033306 | CASP4 | 1.47E-05    | CDS  |
| hsa-miR-518d-3p   | NM_033306 | CASP4 | 5.42E-05    | CDS  |
| hsa-miR-517c-3p   | NM_033306 | CASP4 | 0.003858073 | CDS  |
| hsa-miR-522-5p    | NM_033306 | CASP4 | 1.47E-05    | CDS  |
| hsa-miR-522-3p    | NM_033306 | CASP4 | 4.20E-05    | CDS  |
| hsa-miR-519a-5p   | NM_033306 | CASP4 | 1.47E-05    | CDS  |
| hsa-miR-527       | NM_033306 | CASP4 | 0.000271082 | 5UTR |
| hsa-miR-516a-3p   | NM_033306 | CASP4 | 0.000110421 | CDS  |
| hsa-miR-516a-3p   | NM_033306 | CASP4 | 0.19092     | 5UTR |
| hsa-miR-499a-3p   | NM_033306 | CASP4 | 0.2003249   | 3UTR |
| hsa-miR-499a-3p   | NM_033306 | CASP4 | 0.00089507  | 5UTR |
| hsa-miR-500a-5p   | NM_033306 | CASP4 | 0.000806233 | CDS  |
| hsa-miR-501-5p    | NM_033306 | CASP4 | 0.01515751  | CDS  |
| hsa-miR-501-5p    | NM_033306 | CASP4 | 0.000585775 | CDS  |
| hsa-miR-502-3p    | NM_033306 | CASP4 | 2.20E-05    | CDS  |
| hsa-miR-503-5p    | NM_033306 | CASP4 | 0.006381234 | CDS  |
| hsa-miR-503-5p    | NM_033306 | CASP4 | 1.84E-05    | 5UTR |
| hsa-miR-503-3p    | NM_033306 | CASP4 | 0.01412757  | CDS  |
| hsa-miR-503-3p    | NM_033306 | CASP4 | 0.01804151  | CDS  |
| hsa-miR-504-5p    | NM_033306 | CASP4 | 0.000429816 | CDS  |
| hsa-miR-504-5p    | NM_033306 | CASP4 | 0.002877047 | CDS  |
| hsa-miR-504-3p    | NM_033306 | CASP4 | 0.005953452 | 3UTR |
| hsa-miR-504-3p    | NM_033306 | CASP4 | 0.001893298 | CDS  |
| hsa-miR-505-5p    | NM_033306 | CASP4 | 0.002868814 | CDS  |
| hsa-miR-508-5p    | NM_033306 | CASP4 | 0.02114427  | CDS  |
| hsa-miR-508-3p    | NM_033306 | CASP4 | 0.00558577  | CDS  |
| hsa-miR-509-3p    | NM_033306 | CASP4 | 4.82E-05    | CDS  |
| hsa-miR-510-5p    | NM_033306 | CASP4 | 0.006933323 | CDS  |
| hsa-miR-514a-3p   | NM_033306 | CASP4 | 5.83E-05    | CDS  |
| hsa-miR-455-5p    | NM_033306 | CASP4 | 0.0171237   | CDS  |
| hsa-miR-376a-2-5p | NM_033306 | CASP4 | 0.000547919 | CDS  |
| hsa-miR-487b-5p   | NM_033306 | CASP4 | 0.000659914 | CDS  |
| hsa-miR-551a      | NM_033306 | CASP4 | 9.12E-06    | CDS  |
| hsa-miR-552-3p    | NM_033306 | CASP4 | 0.000190781 | CDS  |
| hsa-miR-552-3p    | NM_033306 | CASP4 | 0.00104551  | CDS  |
| hsa-miR-552-3p    | NM_033306 | CASP4 | 0.001645968 | 5UTR |
| hsa-miR-554       | NM_033306 | CASP4 | 0.000933448 | CDS  |
| hsa-miR-554       | NM_033306 | CASP4 | 7.30E-05    | CDS  |
| hsa-miR-92b-5p    | NM_033306 | CASP4 | 0.00023335  | CDS  |
| hsa-miR-92b-3p    | NM_033306 | CASP4 | 9.11E-05    | CDS  |
| hsa-miR-556-5p    | NM_033306 | CASP4 | 0.08247515  | CDS  |
| hsa-miR-557       | NM_033306 | CASP4 | 7.53E-05    | CDS  |
| hsa-miR-558       | NM_033306 | CASP4 | 0.000240069 | CDS  |
| hsa-miR-562       | NM_033306 | CASP4 | 0.005470165 | CDS  |

|                 |           |       |             |      |
|-----------------|-----------|-------|-------------|------|
| hsa-miR-562     | NM_033306 | CASP4 | 0.00094399  | CDS  |
| hsa-miR-564     | NM_033306 | CASP4 | 0.000248963 | CDS  |
| hsa-miR-551b-3p | NM_033306 | CASP4 | 0.01082276  | CDS  |
| hsa-miR-572     | NM_033306 | CASP4 | 8.39E-06    | CDS  |
| hsa-miR-572     | NM_033306 | CASP4 | 0.01629919  | 5UTR |
| hsa-miR-572     | NM_033306 | CASP4 | 5.42E-05    | CDS  |
| hsa-miR-572     | NM_033306 | CASP4 | 0.00275918  | CDS  |
| hsa-miR-576-5p  | NM_033306 | CASP4 | 0.007087661 | CDS  |
| hsa-miR-578     | NM_033306 | CASP4 | 0.000179002 | CDS  |
| hsa-miR-579-5p  | NM_033306 | CASP4 | 0.002981617 | CDS  |
| hsa-miR-584-5p  | NM_033306 | CASP4 | 0.000568399 | CDS  |
| hsa-miR-584-3p  | NM_033306 | CASP4 | 0.00013726  | CDS  |
| hsa-miR-587     | NM_033306 | CASP4 | 0.01476588  | 5UTR |
| hsa-miR-587     | NM_033306 | CASP4 | 0.000316211 | 5UTR |
| hsa-miR-548b-5p | NM_033306 | CASP4 | 0.004658662 | CDS  |
| hsa-miR-589-3p  | NM_033306 | CASP4 | 0.01204711  | CDS  |
| hsa-miR-589-3p  | NM_033306 | CASP4 | 0.1092693   | 5UTR |
| hsa-miR-550a-5p | NM_033306 | CASP4 | 0.000433683 | CDS  |
| hsa-miR-550a-5p | NM_033306 | CASP4 | 4.15E-05    | 5UTR |
| hsa-miR-550a-3p | NM_033306 | CASP4 | 0.00275918  | CDS  |
| hsa-miR-593-5p  | NM_033306 | CASP4 | 0.000618481 | 5UTR |
| hsa-miR-593-5p  | NM_033306 | CASP4 | 0.002517568 | CDS  |
| hsa-miR-595     | NM_033306 | CASP4 | 0.004667567 | CDS  |
| hsa-miR-596     | NM_033306 | CASP4 | 0.000108611 | CDS  |
| hsa-miR-597-3p  | NM_033306 | CASP4 | 0.001496186 | CDS  |
| hsa-miR-598-5p  | NM_033306 | CASP4 | 9.92E-06    | 5UTR |
| hsa-miR-598-5p  | NM_033306 | CASP4 | 0.1441932   | CDS  |
| hsa-miR-601     | NM_033306 | CASP4 | 2.93E-05    | CDS  |
| hsa-miR-601     | NM_033306 | CASP4 | 3.01E-06    | CDS  |
| hsa-miR-602     | NM_033306 | CASP4 | 6.27E-05    | CDS  |
| hsa-miR-605-5p  | NM_033306 | CASP4 | 0.002982281 | CDS  |
| hsa-miR-608     | NM_033306 | CASP4 | 0.004446168 | CDS  |
| hsa-miR-609     | NM_033306 | CASP4 | 0.001332125 | CDS  |
| hsa-miR-610     | NM_033306 | CASP4 | 0.00215005  | CDS  |
| hsa-miR-611     | NM_033306 | CASP4 | 0.000275604 | CDS  |
| hsa-miR-612     | NM_033306 | CASP4 | 0.0218458   | 3UTR |
| hsa-miR-612     | NM_033306 | CASP4 | 1.84E-05    | 5UTR |
| hsa-miR-612     | NM_033306 | CASP4 | 0.000230217 | CDS  |
| hsa-miR-613     | NM_033306 | CASP4 | 0.005593335 | CDS  |
| hsa-miR-614     | NM_033306 | CASP4 | 0.02114427  | CDS  |
| hsa-miR-615-5p  | NM_033306 | CASP4 | 8.84E-05    | CDS  |
| hsa-miR-615-5p  | NM_033306 | CASP4 | 0.000482834 | 5UTR |
| hsa-miR-616-3p  | NM_033306 | CASP4 | 0.008172057 | CDS  |
| hsa-miR-616-3p  | NM_033306 | CASP4 | 0.000725653 | CDS  |

|                 |           |       |             |      |
|-----------------|-----------|-------|-------------|------|
| hsa-miR-616-3p  | NM_033306 | CASP4 | 0.005060872 | 3UTR |
| hsa-miR-548c-5p | NM_033306 | CASP4 | 0.153048    | CDS  |
| hsa-miR-617     | NM_033306 | CASP4 | 0.000193288 | CDS  |
| hsa-miR-619-5p  | NM_033306 | CASP4 | 0.01324213  | 5UTR |
| hsa-miR-619-3p  | NM_033306 | CASP4 | 0.000155497 | 5UTR |
| hsa-miR-619-3p  | NM_033306 | CASP4 | 4.84E-05    | CDS  |
| hsa-miR-621     | NM_033306 | CASP4 | 0.000427688 | CDS  |
| hsa-miR-623     | NM_033306 | CASP4 | 1.97E-05    | CDS  |
| hsa-miR-623     | NM_033306 | CASP4 | 0.003175839 | CDS  |
| hsa-miR-624-5p  | NM_033306 | CASP4 | 0.002990015 | CDS  |
| hsa-miR-628-3p  | NM_033306 | CASP4 | 2.74E-06    | CDS  |
| hsa-miR-628-3p  | NM_033306 | CASP4 | 0.03832425  | CDS  |
| hsa-miR-630     | NM_033306 | CASP4 | 0.2003249   | 3UTR |
| hsa-miR-33b-5p  | NM_033306 | CASP4 | 0.01051664  | 5UTR |
| hsa-miR-33b-3p  | NM_033306 | CASP4 | 4.82E-05    | CDS  |
| hsa-miR-632     | NM_033306 | CASP4 | 0.002462912 | CDS  |
| hsa-miR-632     | NM_033306 | CASP4 | 0.001765413 | CDS  |
| hsa-miR-637     | NM_033306 | CASP4 | 0.000604446 | CDS  |
| hsa-miR-638     | NM_033306 | CASP4 | 0.01128763  | 5UTR |
| hsa-miR-638     | NM_033306 | CASP4 | 0.006369709 | CDS  |
| hsa-miR-639     | NM_033306 | CASP4 | 0.003175839 | CDS  |
| hsa-miR-639     | NM_033306 | CASP4 | 0.0218458   | 3UTR |
| hsa-miR-644a    | NM_033306 | CASP4 | 0.007697962 | CDS  |
| hsa-miR-644a    | NM_033306 | CASP4 | 0.419973    | CDS  |
| hsa-miR-645     | NM_033306 | CASP4 | 0.006538049 | 3UTR |
| hsa-miR-647     | NM_033306 | CASP4 | 0.01412757  | 3UTR |
| hsa-miR-648     | NM_033306 | CASP4 | 0.009782782 | CDS  |
| hsa-miR-649     | NM_033306 | CASP4 | 0.05879713  | CDS  |
| hsa-miR-650     | NM_033306 | CASP4 | 2.56E-05    | CDS  |
| hsa-miR-651-5p  | NM_033306 | CASP4 | 0.001637462 | CDS  |
| hsa-miR-652-5p  | NM_033306 | CASP4 | 5.83E-05    | CDS  |
| hsa-miR-548d-3p | NM_033306 | CASP4 | 1.00E-05    | CDS  |
| hsa-miR-661     | NM_033306 | CASP4 | 0.002429208 | CDS  |
| hsa-miR-662     | NM_033306 | CASP4 | 0.00307967  | CDS  |
| hsa-miR-663a    | NM_033306 | CASP4 | 7.32E-05    | CDS  |
| hsa-miR-654-5p  | NM_033306 | CASP4 | 0.007400426 | 5UTR |
| hsa-miR-656-5p  | NM_033306 | CASP4 | 0.00202915  | 5UTR |
| hsa-miR-656-5p  | NM_033306 | CASP4 | 0.2093077   | 3UTR |
| hsa-miR-549a-5p | NM_033306 | CASP4 | 2.59E-05    | CDS  |
| hsa-miR-657     | NM_033306 | CASP4 | 0.000248963 | CDS  |
| hsa-miR-657     | NM_033306 | CASP4 | 0.000579714 | CDS  |
| hsa-miR-658     | NM_033306 | CASP4 | 1.71E-05    | CDS  |
| hsa-miR-659-3p  | NM_033306 | CASP4 | 0.01889378  | 3UTR |
| hsa-miR-542-5p  | NM_033306 | CASP4 | 0.005156117 | CDS  |

|                 |           |       |             |      |
|-----------------|-----------|-------|-------------|------|
| hsa-miR-758-5p  | NM_033306 | CASP4 | 0.02698527  | 5UTR |
| hsa-miR-671-5p  | NM_033306 | CASP4 | 1.60E-07    | 5UTR |
| hsa-miR-671-3p  | NM_033306 | CASP4 | 0.002870221 | CDS  |
| hsa-miR-671-3p  | NM_033306 | CASP4 | 0.01114662  | CDS  |
| hsa-miR-668-5p  | NM_033306 | CASP4 | 0.00017934  | CDS  |
| hsa-miR-668-5p  | NM_033306 | CASP4 | 4.32E-05    | CDS  |
| hsa-miR-668-3p  | NM_033306 | CASP4 | 9.07E-06    | CDS  |
| hsa-miR-767-5p  | NM_033306 | CASP4 | 0.001656376 | 5UTR |
| hsa-miR-767-3p  | NM_033306 | CASP4 | 3.30E-05    | CDS  |
| hsa-miR-1224-5p | NM_033306 | CASP4 | 0.002526276 | CDS  |
| hsa-miR-1224-5p | NM_033306 | CASP4 | 0.003549331 | 5UTR |
| hsa-miR-320b    | NM_033306 | CASP4 | 0.0218458   | CDS  |
| hsa-miR-320c    | NM_033306 | CASP4 | 0.0218458   | 3UTR |
| hsa-miR-320c    | NM_033306 | CASP4 | 0.2093077   | 3UTR |
| hsa-miR-1296-5p | NM_033306 | CASP4 | 0.01597706  | CDS  |
| hsa-miR-1468-5p | NM_033306 | CASP4 | 0.000645829 | CDS  |
| hsa-miR-1323    | NM_033306 | CASP4 | 0.003534416 | CDS  |
| hsa-miR-1271-3p | NM_033306 | CASP4 | 0.000142782 | CDS  |
| hsa-miR-1271-3p | NM_033306 | CASP4 | 0.01629919  | 5UTR |
| hsa-miR-1301-5p | NM_033306 | CASP4 | 1.47E-05    | CDS  |
| hsa-miR-1301-3p | NM_033306 | CASP4 | 1.81E-05    | CDS  |
| hsa-miR-449c-5p | NM_033306 | CASP4 | 0.00104551  | CDS  |
| hsa-miR-449c-5p | NM_033306 | CASP4 | 0.0183131   | 5UTR |
| hsa-miR-769-5p  | NM_033306 | CASP4 | 0.002973746 | CDS  |
| hsa-miR-769-5p  | NM_033306 | CASP4 | 0.02607847  | CDS  |
| hsa-miR-769-3p  | NM_033306 | CASP4 | 0.01091542  | CDS  |
| hsa-miR-766-5p  | NM_033306 | CASP4 | 8.44E-05    | CDS  |
| hsa-miR-766-5p  | NM_033306 | CASP4 | 0.005953452 | 3UTR |
| hsa-miR-766-3p  | NM_033306 | CASP4 | 0.000271082 | 5UTR |
| hsa-miR-378d    | NM_033306 | CASP4 | 0.004080075 | CDS  |
| hsa-miR-762     | NM_033306 | CASP4 | 0.005598497 | 3UTR |
| hsa-miR-670-5p  | NM_033306 | CASP4 | 0.00059852  | CDS  |
| hsa-miR-2113    | NM_033306 | CASP4 | 0.000481874 | CDS  |
| hsa-miR-2113    | NM_033306 | CASP4 | 0.000148032 | CDS  |
| hsa-miR-761     | NM_033306 | CASP4 | 0.000789679 | 5UTR |
| hsa-miR-764     | NM_033306 | CASP4 | 0.000818056 | CDS  |
| hsa-miR-764     | NM_033306 | CASP4 | 9.29E-05    | CDS  |
| hsa-miR-675-5p  | NM_033306 | CASP4 | 0.000369195 | CDS  |
| hsa-miR-675-3p  | NM_033306 | CASP4 | 1.75E-05    | CDS  |
| hsa-miR-298     | NM_033306 | CASP4 | 0.000536431 | CDS  |
| hsa-miR-300     | NM_033306 | CASP4 | 9.11E-05    | CDS  |
| hsa-miR-890     | NM_033306 | CASP4 | 0.07891548  | 5UTR |
| hsa-miR-888-3p  | NM_033306 | CASP4 | 0.01082276  | CDS  |
| hsa-miR-892b    | NM_033306 | CASP4 | 0.007606361 | CDS  |

|                  |           |       |             |      |
|------------------|-----------|-------|-------------|------|
| hsa-miR-541-3p   | NM_033306 | CASP4 | 1.41E-05    | CDS  |
| hsa-miR-541-3p   | NM_033306 | CASP4 | 0.008659816 | CDS  |
| hsa-miR-147b-3p  | NM_033306 | CASP4 | 0.005709682 | CDS  |
| hsa-miR-744-5p   | NM_033306 | CASP4 | 0.005598497 | 3UTR |
| hsa-miR-744-5p   | NM_033306 | CASP4 | 2.20E-05    | CDS  |
| hsa-miR-877-5p   | NM_033306 | CASP4 | 0.003549331 | 5UTR |
| hsa-miR-877-3p   | NM_033306 | CASP4 | 0.3628757   | 5UTR |
| hsa-miR-887-3p   | NM_033306 | CASP4 | 0.000215353 | CDS  |
| hsa-miR-665      | NM_033306 | CASP4 | 0.000282051 | CDS  |
| hsa-miR-665      | NM_033306 | CASP4 | 0.002113119 | 5UTR |
| hsa-miR-665      | NM_033306 | CASP4 | 2.14E-05    | CDS  |
| hsa-miR-873-3p   | NM_033306 | CASP4 | 7.63E-06    | CDS  |
| hsa-miR-543      | NM_033306 | CASP4 | 7.32E-05    | CDS  |
| hsa-miR-374b-3p  | NM_033306 | CASP4 | 0.2003249   | 3UTR |
| hsa-miR-301b-5p  | NM_033306 | CASP4 | 5.70E-05    | CDS  |
| hsa-miR-216b-5p  | NM_033306 | CASP4 | 1.13E-06    | CDS  |
| hsa-miR-920      | NM_033306 | CASP4 | 7.63E-06    | CDS  |
| hsa-miR-920      | NM_033306 | CASP4 | 0.002811797 | CDS  |
| hsa-miR-921      | NM_033306 | CASP4 | 0.003855371 | 5UTR |
| hsa-miR-924      | NM_033306 | CASP4 | 0.01085729  | CDS  |
| hsa-miR-924      | NM_033306 | CASP4 | 0.000482834 | 5UTR |
| hsa-miR-509-3-5p | NM_033306 | CASP4 | 1.81E-05    | CDS  |
| hsa-miR-933      | NM_033306 | CASP4 | 0.000266327 | CDS  |
| hsa-miR-933      | NM_033306 | CASP4 | 0.000833903 | 5UTR |
| hsa-miR-937-5p   | NM_033306 | CASP4 | 0.006276804 | 3UTR |
| hsa-miR-937-5p   | NM_033306 | CASP4 | 0.002868814 | CDS  |
| hsa-miR-937-5p   | NM_033306 | CASP4 | 0.00059852  | CDS  |
| hsa-miR-938      | NM_033306 | CASP4 | 9.07E-06    | CDS  |
| hsa-miR-939-5p   | NM_033306 | CASP4 | 0.01093692  | CDS  |
| hsa-miR-939-3p   | NM_033306 | CASP4 | 0.002982281 | CDS  |
| hsa-miR-940      | NM_033306 | CASP4 | 0.000618857 | CDS  |
| hsa-miR-941      | NM_033306 | CASP4 | 0.003677598 | CDS  |
| hsa-miR-1178-5p  | NM_033306 | CASP4 | 0.000203446 | CDS  |
| hsa-miR-1180-3p  | NM_033306 | CASP4 | 0.003929355 | CDS  |
| hsa-miR-1180-3p  | NM_033306 | CASP4 | 8.53E-07    | CDS  |
| hsa-miR-1180-3p  | NM_033306 | CASP4 | 0.000883504 | CDS  |
| hsa-miR-1181     | NM_033306 | CASP4 | 2.20E-05    | 5UTR |
| hsa-miR-1182     | NM_033306 | CASP4 | 0.005208109 | 3UTR |
| hsa-miR-1182     | NM_033306 | CASP4 | 0.000651958 | CDS  |
| hsa-miR-1182     | NM_033306 | CASP4 | 0.001893298 | CDS  |
| hsa-miR-1183     | NM_033306 | CASP4 | 1.81E-05    | CDS  |
| hsa-miR-1184     | NM_033306 | CASP4 | 0.01923861  | 3UTR |
| hsa-miR-1225-5p  | NM_033306 | CASP4 | 0.000328221 | CDS  |
| hsa-miR-1225-3p  | NM_033306 | CASP4 | 0.007669794 | CDS  |



|                 |           |       |             |      |
|-----------------|-----------|-------|-------------|------|
| hsa-miR-1226-5p | NM_033306 | CASP4 | 7.53E-05    | CDS  |
| hsa-miR-1226-3p | NM_033306 | CASP4 | 0.000614096 | CDS  |
| hsa-miR-1227-5p | NM_033306 | CASP4 | 0.004418741 | CDS  |
| hsa-miR-1227-3p | NM_033306 | CASP4 | 0.3503675   | 5UTR |
| hsa-miR-1228-5p | NM_033306 | CASP4 | 0.000867817 | CDS  |
| hsa-miR-1229-5p | NM_033306 | CASP4 | 0.001893298 | CDS  |
| hsa-miR-1229-5p | NM_033306 | CASP4 | 0.006819084 | CDS  |
| hsa-miR-1229-5p | NM_033306 | CASP4 | 0.005968974 | CDS  |
| hsa-miR-1231    | NM_033306 | CASP4 | 4.15E-05    | 5UTR |
| hsa-miR-1231    | NM_033306 | CASP4 | 9.44E-06    | CDS  |
| hsa-miR-1233-3p | NM_033306 | CASP4 | 0.007669794 | CDS  |
| hsa-miR-1233-3p | NM_033306 | CASP4 | 2.10E-07    | 5UTR |
| hsa-miR-1234-3p | NM_033306 | CASP4 | 8.25E-06    | CDS  |
| hsa-miR-1237-5p | NM_033306 | CASP4 | 2.56E-05    | CDS  |
| hsa-miR-1237-5p | NM_033306 | CASP4 | 0.000427688 | CDS  |
| hsa-miR-1237-3p | NM_033306 | CASP4 | 8.36E-06    | CDS  |
| hsa-miR-1238-5p | NM_033306 | CASP4 | 0.006073437 | CDS  |
| hsa-miR-1238-5p | NM_033306 | CASP4 | 0.2935726   | CDS  |
| hsa-miR-1238-3p | NM_033306 | CASP4 | 0.002551803 | 5UTR |
| hsa-miR-1238-3p | NM_033306 | CASP4 | 0.04481015  | CDS  |
| hsa-miR-1202    | NM_033306 | CASP4 | 0.000328221 | CDS  |
| hsa-miR-1203    | NM_033306 | CASP4 | 0.000127802 | CDS  |
| hsa-miR-1203    | NM_033306 | CASP4 | 0.002150872 | CDS  |
| hsa-miR-663b    | NM_033306 | CASP4 | 0.000318808 | CDS  |
| hsa-miR-663b    | NM_033306 | CASP4 | 0.000427688 | CDS  |
| hsa-miR-1204    | NM_033306 | CASP4 | 0.000328221 | CDS  |
| hsa-miR-1205    | NM_033306 | CASP4 | 0.003175839 | CDS  |
| hsa-miR-1207-5p | NM_033306 | CASP4 | 0.006538049 | CDS  |
| hsa-miR-1285-5p | NM_033306 | CASP4 | 0.001656269 | 5UTR |
| hsa-miR-1285-3p | NM_033306 | CASP4 | 3.30E-05    | CDS  |
| hsa-miR-1286    | NM_033306 | CASP4 | 1.82E-05    | CDS  |
| hsa-miR-1287-5p | NM_033306 | CASP4 | 0.000933448 | CDS  |
| hsa-miR-1287-5p | NM_033306 | CASP4 | 0.005469725 | CDS  |
| hsa-miR-1287-3p | NM_033306 | CASP4 | 0.001371415 | CDS  |
| hsa-miR-1289    | NM_033306 | CASP4 | 0.04253148  | CDS  |
| hsa-miR-1289    | NM_033306 | CASP4 | 0.002150872 | CDS  |
| hsa-miR-1291    | NM_033306 | CASP4 | 0.0151755   | CDS  |
| hsa-miR-1293    | NM_033306 | CASP4 | 4.36E-05    | CDS  |
| hsa-miR-1293    | NM_033306 | CASP4 | 0.000152731 | CDS  |
| hsa-miR-1295a   | NM_033306 | CASP4 | 0.005352298 | CDS  |
| hsa-miR-1295a   | NM_033306 | CASP4 | 0.000781748 | CDS  |
| hsa-miR-1299    | NM_033306 | CASP4 | 0.006933323 | CDS  |
| hsa-miR-1299    | NM_033306 | CASP4 | 0.000953216 | 5UTR |
| hsa-miR-1304-5p | NM_033306 | CASP4 | 0.000953216 | 5UTR |

|                  |           |       |             |      |
|------------------|-----------|-------|-------------|------|
| hsa-miR-1244     | NM_033306 | CASP4 | 0.153048    | CDS  |
| hsa-miR-1244     | NM_033306 | CASP4 | 0.00094399  | CDS  |
| hsa-miR-1247-5p  | NM_033306 | CASP4 | 0.008718099 | CDS  |
| hsa-miR-1247-3p  | NM_033306 | CASP4 | 5.83E-05    | CDS  |
| hsa-miR-1248     | NM_033306 | CASP4 | 0.06439771  | CDS  |
| hsa-miR-1249-5p  | NM_033306 | CASP4 | 0.002284785 | CDS  |
| hsa-miR-1250-5p  | NM_033306 | CASP4 | 0.000369195 | CDS  |
| hsa-miR-1250-5p  | NM_033306 | CASP4 | 0.1249703   | 5UTR |
| hsa-miR-1250-5p  | NM_033306 | CASP4 | 2.78E-05    | CDS  |
| hsa-miR-1250-5p  | NM_033306 | CASP4 | 0.01412757  | 3UTR |
| hsa-miR-1251-5p  | NM_033306 | CASP4 | 2.44E-05    | CDS  |
| hsa-miR-1251-3p  | NM_033306 | CASP4 | 0.003226944 | 5UTR |
| hsa-miR-1255a    | NM_033306 | CASP4 | 0.000717477 | CDS  |
| hsa-miR-1260a    | NM_033306 | CASP4 | 0.003175839 | CDS  |
| hsa-miR-1261     | NM_033306 | CASP4 | 0.01179483  | CDS  |
| hsa-miR-1261     | NM_033306 | CASP4 | 0.000556588 | CDS  |
| hsa-miR-548m     | NM_033306 | CASP4 | 0.0151755   | CDS  |
| hsa-miR-1265     | NM_033306 | CASP4 | 4.39E-05    | CDS  |
| hsa-miR-1266-5p  | NM_033306 | CASP4 | 0.000907814 | CDS  |
| hsa-miR-1268a    | NM_033306 | CASP4 | 0.005546619 | CDS  |
| hsa-miR-1268a    | NM_033306 | CASP4 | 0.02350072  | CDS  |
| hsa-miR-1270     | NM_033306 | CASP4 | 0.157008    | CDS  |
| hsa-miR-1275     | NM_033306 | CASP4 | 1.17E-07    | 5UTR |
| hsa-miR-1276     | NM_033306 | CASP4 | 0.01085729  | CDS  |
| hsa-miR-1284     | NM_033306 | CASP4 | 0.000585775 | CDS  |
| hsa-miR-1288-3p  | NM_033306 | CASP4 | 0.000709764 | 5UTR |
| hsa-miR-1292-5p  | NM_033306 | CASP4 | 1.67E-07    | 5UTR |
| hsa-miR-1255b-5p | NM_033306 | CASP4 | 0.005968974 | CDS  |
| hsa-miR-664a-5p  | NM_033306 | CASP4 | 0.004080075 | CDS  |
| hsa-miR-1307-5p  | NM_033306 | CASP4 | 0.001474321 | CDS  |
| hsa-miR-1322     | NM_033306 | CASP4 | 0.000122406 | CDS  |
| hsa-miR-1469     | NM_033306 | CASP4 | 0.006819084 | 3UTR |
| hsa-miR-1469     | NM_033306 | CASP4 | 0.000604446 | CDS  |
| hsa-miR-1470     | NM_033306 | CASP4 | 8.39E-06    | CDS  |
| hsa-miR-1471     | NM_033306 | CASP4 | 0.02503297  | CDS  |
| hsa-miR-1538     | NM_033306 | CASP4 | 0.006538049 | 3UTR |
| hsa-miR-1538     | NM_033306 | CASP4 | 0.007399047 | CDS  |
| hsa-miR-1539     | NM_033306 | CASP4 | 0.000127802 | CDS  |
| hsa-miR-320d     | NM_033306 | CASP4 | 0.0218458   | 3UTR |
| hsa-miR-1825     | NM_033306 | CASP4 | 0.002870221 | CDS  |
| hsa-miR-1827     | NM_033306 | CASP4 | 0.01506736  | CDS  |
| hsa-miR-1908-5p  | NM_033306 | CASP4 | 0.0001889   | 5UTR |
| hsa-miR-1908-3p  | NM_033306 | CASP4 | 2.83E-05    | CDS  |
| hsa-miR-1908-3p  | NM_033306 | CASP4 | 0.001474321 | CDS  |

|                 |           |       |             |      |
|-----------------|-----------|-------|-------------|------|
| hsa-miR-1909-3p | NM_033306 | CASP4 | 0.02503297  | CDS  |
| hsa-miR-1909-3p | NM_033306 | CASP4 | 0.000256036 | CDS  |
| hsa-miR-1909-3p | NM_033306 | CASP4 | 0.000131593 | CDS  |
| hsa-miR-1910-3p | NM_033306 | CASP4 | 0.1524418   | CDS  |
| hsa-miR-1911-5p | NM_033306 | CASP4 | 0.01128548  | CDS  |
| hsa-miR-1912-5p | NM_033306 | CASP4 | 0.003209116 | 5UTR |
| hsa-miR-1912-3p | NM_033306 | CASP4 | 0.000892483 | 5UTR |
| hsa-miR-1914-3p | NM_033306 | CASP4 | 0.000768445 | CDS  |
| hsa-miR-1914-3p | NM_033306 | CASP4 | 0.01106304  | 5UTR |
| hsa-miR-1915-5p | NM_033306 | CASP4 | 0.002043339 | 5UTR |
| hsa-miR-1915-3p | NM_033306 | CASP4 | 0.000489407 | 5UTR |
| hsa-miR-1972    | NM_033306 | CASP4 | 0.000185897 | 5UTR |
| hsa-miR-1972    | NM_033306 | CASP4 | 2.78E-05    | CDS  |
| hsa-miR-1976    | NM_033306 | CASP4 | 0.001862046 | CDS  |
| hsa-miR-2110    | NM_033306 | CASP4 | 1.15E-06    | 5UTR |
| hsa-miR-2114-5p | NM_033306 | CASP4 | 0.002990015 | CDS  |
| hsa-miR-2114-5p | NM_033306 | CASP4 | 0.002228703 | CDS  |
| hsa-miR-2115-5p | NM_033306 | CASP4 | 0.000208747 | CDS  |
| hsa-miR-2115-5p | NM_033306 | CASP4 | 0.000317383 | CDS  |
| hsa-miR-2116-5p | NM_033306 | CASP4 | 0.00720588  | CDS  |
| hsa-miR-2116-5p | NM_033306 | CASP4 | 0.002304037 | CDS  |
| hsa-miR-2116-3p | NM_033306 | CASP4 | 5.83E-05    | CDS  |
| hsa-miR-2117    | NM_033306 | CASP4 | 2.08E-06    | CDS  |
| hsa-miR-2277-5p | NM_033306 | CASP4 | 0.006819084 | 3UTR |
| hsa-miR-2277-3p | NM_033306 | CASP4 | 2.83E-05    | CDS  |
| hsa-miR-2278    | NM_033306 | CASP4 | 0.002868814 | CDS  |
| hsa-miR-2681-5p | NM_033306 | CASP4 | 0.002731967 | 5UTR |
| hsa-miR-2682-3p | NM_033306 | CASP4 | 8.39E-06    | CDS  |
| hsa-miR-711     | NM_033306 | CASP4 | 0.003167914 | 5UTR |
| hsa-miR-718     | NM_033306 | CASP4 | 0.000323006 | CDS  |
| hsa-miR-2861    | NM_033306 | CASP4 | 0.002150872 | CDS  |
| hsa-miR-2861    | NM_033306 | CASP4 | 3.43E-05    | CDS  |
| hsa-miR-2909    | NM_033306 | CASP4 | 0.000789679 | 5UTR |
| hsa-miR-3120-5p | NM_033306 | CASP4 | 0.002982281 | CDS  |
| hsa-miR-3121-5p | NM_033306 | CASP4 | 0.003226944 | 5UTR |
| hsa-miR-3122    | NM_033306 | CASP4 | 0.002526276 | CDS  |
| hsa-miR-3126-3p | NM_033306 | CASP4 | 0.04342061  | CDS  |
| hsa-miR-3127-5p | NM_033306 | CASP4 | 8.66E-05    | CDS  |
| hsa-miR-3127-3p | NM_033306 | CASP4 | 0.003175839 | CDS  |
| hsa-miR-3130-5p | NM_033306 | CASP4 | 0.000614096 | CDS  |
| hsa-miR-3132    | NM_033306 | CASP4 | 0.07284884  | 5UTR |
| hsa-miR-3132    | NM_033306 | CASP4 | 0.1235503   | 5UTR |
| hsa-miR-3132    | NM_033306 | CASP4 | 0.01128548  | CDS  |
| hsa-miR-378b    | NM_033306 | CASP4 | 4.93E-05    | CDS  |

|                  |           |       |             |      |
|------------------|-----------|-------|-------------|------|
| hsa-miR-3135a    | NM_033306 | CASP4 | 0.000833903 | 5UTR |
| hsa-miR-3135a    | NM_033306 | CASP4 | 0.000583799 | CDS  |
| hsa-miR-544b     | NM_033306 | CASP4 | 0.002982281 | CDS  |
| hsa-miR-3137     | NM_033306 | CASP4 | 4.61E-06    | CDS  |
| hsa-miR-3138     | NM_033306 | CASP4 | 0.01179483  | CDS  |
| hsa-miR-3140-3p  | NM_033306 | CASP4 | 0.002973746 | CDS  |
| hsa-miR-548t-3p  | NM_033306 | CASP4 | 0.002981617 | CDS  |
| hsa-miR-3141     | NM_033306 | CASP4 | 0.005208109 | CDS  |
| hsa-miR-3142     | NM_033306 | CASP4 | 0.00438586  | CDS  |
| hsa-miR-3146     | NM_033306 | CASP4 | 0.005841042 | CDS  |
| hsa-miR-3147     | NM_033306 | CASP4 | 4.34E-05    | CDS  |
| hsa-miR-3147     | NM_033306 | CASP4 | 0.000867817 | CDS  |
| hsa-miR-548v     | NM_033306 | CASP4 | 1.00E-05    | CDS  |
| hsa-miR-3150a-3p | NM_033306 | CASP4 | 2.11E-05    | CDS  |
| hsa-miR-3150a-3p | NM_033306 | CASP4 | 0.08287535  | 5UTR |
| hsa-miR-3151-5p  | NM_033306 | CASP4 | 4.34E-05    | CDS  |
| hsa-miR-3151-5p  | NM_033306 | CASP4 | 0.000867817 | CDS  |
| hsa-miR-3151-3p  | NM_033306 | CASP4 | 1.38E-05    | CDS  |
| hsa-miR-3152-5p  | NM_033306 | CASP4 | 2.43E-07    | 5UTR |
| hsa-miR-3152-5p  | NM_033306 | CASP4 | 0.001173278 | 5UTR |
| hsa-miR-3153     | NM_033306 | CASP4 | 0.000556588 | CDS  |
| hsa-miR-3154     | NM_033306 | CASP4 | 0.006369709 | 3UTR |
| hsa-miR-3154     | NM_033306 | CASP4 | 0.000275599 | 5UTR |
| hsa-miR-3155a    | NM_033306 | CASP4 | 0.000220485 | 5UTR |
| hsa-miR-3155a    | NM_033306 | CASP4 | 0.001474321 | CDS  |
| hsa-miR-3156-5p  | NM_033306 | CASP4 | 0.0357771   | CDS  |
| hsa-miR-3156-3p  | NM_033306 | CASP4 | 0.000172769 | CDS  |
| hsa-miR-3156-3p  | NM_033306 | CASP4 | 0.001140635 | CDS  |
| hsa-miR-3157-5p  | NM_033306 | CASP4 | 0.002517568 | CDS  |
| hsa-miR-3158-5p  | NM_033306 | CASP4 | 0.001301877 | CDS  |
| hsa-miR-3158-5p  | NM_033306 | CASP4 | 0.000127802 | CDS  |
| hsa-miR-3158-3p  | NM_033306 | CASP4 | 0.01085729  | CDS  |
| hsa-miR-3158-3p  | NM_033306 | CASP4 | 7.32E-05    | CDS  |
| hsa-miR-3158-3p  | NM_033306 | CASP4 | 0.000193288 | CDS  |
| hsa-miR-3160-5p  | NM_033306 | CASP4 | 0.000579714 | CDS  |
| hsa-miR-3160-5p  | NM_033306 | CASP4 | 0.000429816 | CDS  |
| hsa-miR-3173-3p  | NM_033306 | CASP4 | 0.006369709 | CDS  |
| hsa-miR-323b-5p  | NM_033306 | CASP4 | 0.006830788 | 5UTR |
| hsa-miR-3175     | NM_033306 | CASP4 | 0.002811797 | CDS  |
| hsa-miR-3175     | NM_033306 | CASP4 | 0.006415714 | 5UTR |
| hsa-miR-3176     | NM_033306 | CASP4 | 4.34E-05    | CDS  |
| hsa-miR-3177-3p  | NM_033306 | CASP4 | 2.20E-05    | CDS  |
| hsa-miR-3180-5p  | NM_033306 | CASP4 | 0.002870221 | CDS  |
| hsa-miR-3180-3p  | NM_033306 | CASP4 | 0.001637462 | CDS  |

|                 |           |       |             |      |
|-----------------|-----------|-------|-------------|------|
| hsa-miR-3181    | NM_033306 | CASP4 | 8.39E-06    | CDS  |
| hsa-miR-3181    | NM_033306 | CASP4 | 0.00124429  | CDS  |
| hsa-miR-3183    | NM_033306 | CASP4 | 0.002304037 | 5UTR |
| hsa-miR-3184-5p | NM_033306 | CASP4 | 0.01099641  | 5UTR |
| hsa-miR-3184-3p | NM_033306 | CASP4 | 0.000171579 | CDS  |
| hsa-miR-3065-3p | NM_033306 | CASP4 | 1.92E-05    | CDS  |
| hsa-miR-3186-5p | NM_033306 | CASP4 | 0.0151755   | CDS  |
| hsa-miR-3187-5p | NM_033306 | CASP4 | 0.01923861  | CDS  |
| hsa-miR-3187-3p | NM_033306 | CASP4 | 1.84E-05    | 5UTR |
| hsa-miR-3189-5p | NM_033306 | CASP4 | 0.00307967  | CDS  |
| hsa-miR-3189-3p | NM_033306 | CASP4 | 0.001807756 | CDS  |
| hsa-miR-320e    | NM_033306 | CASP4 | 0.0218458   | CDS  |
| hsa-miR-3190-3p | NM_033306 | CASP4 | 0.36122     | CDS  |
| hsa-miR-3190-3p | NM_033306 | CASP4 | 0.000606734 | CDS  |
| hsa-miR-3191-5p | NM_033306 | CASP4 | 0.002311532 | CDS  |
| hsa-miR-3191-5p | NM_033306 | CASP4 | 0.000922214 | CDS  |
| hsa-miR-3191-3p | NM_033306 | CASP4 | 0.002861213 | CDS  |
| hsa-miR-3192-5p | NM_033306 | CASP4 | 0.03101366  | CDS  |
| hsa-miR-3192-3p | NM_033306 | CASP4 | 5.70E-05    | CDS  |
| hsa-miR-3194-3p | NM_033306 | CASP4 | 0.000317383 | CDS  |
| hsa-miR-3195    | NM_033306 | CASP4 | 9.92E-06    | 5UTR |
| hsa-miR-3196    | NM_033306 | CASP4 | 1.60E-07    | 5UTR |
| hsa-miR-3196    | NM_033306 | CASP4 | 0.005060872 | 3UTR |
| hsa-miR-3196    | NM_033306 | CASP4 | 0.008948377 | CDS  |
| hsa-miR-3197    | NM_033306 | CASP4 | 0.000867817 | CDS  |
| hsa-miR-3200-3p | NM_033306 | CASP4 | 6.27E-05    | CDS  |
| hsa-miR-514b-5p | NM_033306 | CASP4 | 0.000299959 | CDS  |
| hsa-miR-514b-3p | NM_033306 | CASP4 | 5.83E-05    | CDS  |
| hsa-miR-514b-3p | NM_033306 | CASP4 | 0.000867939 | 5UTR |
| hsa-miR-4296    | NM_033306 | CASP4 | 0.004418741 | CDS  |
| hsa-miR-378c    | NM_033306 | CASP4 | 0.02723061  | CDS  |
| hsa-miR-378c    | NM_033306 | CASP4 | 0.004080075 | CDS  |
| hsa-miR-4294    | NM_033306 | CASP4 | 0.003167914 | 5UTR |
| hsa-miR-4299    | NM_033306 | CASP4 | 0.000578367 | CDS  |
| hsa-miR-4298    | NM_033306 | CASP4 | 4.84E-05    | CDS  |
| hsa-miR-4304    | NM_033306 | CASP4 | 0.001365539 | 5UTR |
| hsa-miR-4305    | NM_033306 | CASP4 | 0.001474321 | CDS  |
| hsa-miR-4308    | NM_033306 | CASP4 | 0.004508277 | CDS  |
| hsa-miR-4312    | NM_033306 | CASP4 | 0.0001625   | CDS  |
| hsa-miR-4312    | NM_033306 | CASP4 | 0.006037169 | CDS  |
| hsa-miR-4312    | NM_033306 | CASP4 | 0.000723658 | CDS  |
| hsa-miR-4315    | NM_033306 | CASP4 | 0.001140635 | CDS  |
| hsa-miR-4315    | NM_033306 | CASP4 | 0.002776349 | 5UTR |
| hsa-miR-4320    | NM_033306 | CASP4 | 0.005669939 | CDS  |

|                  |           |       |             |      |
|------------------|-----------|-------|-------------|------|
| hsa-miR-4320     | NM_033306 | CASP4 | 0.01412757  | 3UTR |
| hsa-miR-4317     | NM_033306 | CASP4 | 0.01133917  | CDS  |
| hsa-miR-4322     | NM_033306 | CASP4 | 0.000220485 | 5UTR |
| hsa-miR-4322     | NM_033306 | CASP4 | 1.81E-05    | CDS  |
| hsa-miR-4259     | NM_033306 | CASP4 | 0.0218458   | CDS  |
| hsa-miR-4253     | NM_033306 | CASP4 | 0.008948377 | CDS  |
| hsa-miR-4326     | NM_033306 | CASP4 | 0.4120304   | 5UTR |
| hsa-miR-4327     | NM_033306 | CASP4 | 0.0001889   | 5UTR |
| hsa-miR-4327     | NM_033306 | CASP4 | 0.00048512  | CDS  |
| hsa-miR-4265     | NM_033306 | CASP4 | 0.001806281 | CDS  |
| hsa-miR-4265     | NM_033306 | CASP4 | 0.01274028  | CDS  |
| hsa-miR-4266     | NM_033306 | CASP4 | 0.005953452 | 3UTR |
| hsa-miR-4268     | NM_033306 | CASP4 | 0.001427036 | CDS  |
| hsa-miR-4268     | NM_033306 | CASP4 | 0.01017319  | CDS  |
| hsa-miR-4268     | NM_033306 | CASP4 | 0.000317383 | CDS  |
| hsa-miR-4269     | NM_033306 | CASP4 | 0.009509266 | 5UTR |
| hsa-miR-4269     | NM_033306 | CASP4 | 0.01082276  | CDS  |
| hsa-miR-4270     | NM_033306 | CASP4 | 0.002868814 | CDS  |
| hsa-miR-4270     | NM_033306 | CASP4 | 0.005156117 | CDS  |
| hsa-miR-4270     | NM_033306 | CASP4 | 0.01348408  | 5UTR |
| hsa-miR-4270     | NM_033306 | CASP4 | 0.008560229 | CDS  |
| hsa-miR-4271     | NM_033306 | CASP4 | 0.006415714 | 5UTR |
| hsa-miR-4281     | NM_033306 | CASP4 | 0.01412757  | CDS  |
| hsa-miR-4277     | NM_033306 | CASP4 | 0.008145339 | CDS  |
| hsa-miR-4278     | NM_033306 | CASP4 | 0.03290779  | CDS  |
| hsa-miR-4278     | NM_033306 | CASP4 | 0.003855371 | 5UTR |
| hsa-miR-4283     | NM_033306 | CASP4 | 0.006415714 | 5UTR |
| hsa-miR-4284     | NM_033306 | CASP4 | 9.12E-06    | CDS  |
| hsa-miR-4286     | NM_033306 | CASP4 | 0.00307967  | CDS  |
| hsa-miR-4290     | NM_033306 | CASP4 | 0.3503675   | 5UTR |
| hsa-miR-4328     | NM_033306 | CASP4 | 0.000131593 | CDS  |
| hsa-miR-3605-5p  | NM_033306 | CASP4 | 0.000275604 | CDS  |
| hsa-miR-3614-5p  | NM_033306 | CASP4 | 0.001140635 | CDS  |
| hsa-miR-3614-5p  | NM_033306 | CASP4 | 0.000231173 | CDS  |
| hsa-miR-3614-3p  | NM_033306 | CASP4 | 0.000282051 | CDS  |
| hsa-miR-3616-3p  | NM_033306 | CASP4 | 0.02114427  | CDS  |
| hsa-miR-3616-3p  | NM_033306 | CASP4 | 0.00080334  | CDS  |
| hsa-miR-3617-5p  | NM_033306 | CASP4 | 0.006733282 | CDS  |
| hsa-miR-3619-5p  | NM_033306 | CASP4 | 0.0173686   | 5UTR |
| hsa-miR-3619-5p  | NM_033306 | CASP4 | 0.00013726  | CDS  |
| hsa-miR-3620-5p  | NM_033306 | CASP4 | 0.006819084 | CDS  |
| hsa-miR-3621     | NM_033306 | CASP4 | 6.27E-05    | CDS  |
| hsa-miR-3622a-5p | NM_033306 | CASP4 | 0.00104551  | CDS  |
| hsa-miR-3622a-5p | NM_033306 | CASP4 | 2.05E-05    | CDS  |

|                  |           |       |             |      |
|------------------|-----------|-------|-------------|------|
| hsa-miR-3622a-3p | NM_033306 | CASP4 | 8.25E-06    | CDS  |
| hsa-miR-3622b-5p | NM_033306 | CASP4 | 0.00438586  | CDS  |
| hsa-miR-3622b-5p | NM_033306 | CASP4 | 0.000844485 | CDS  |
| hsa-miR-3622b-3p | NM_033306 | CASP4 | 0.000188063 | CDS  |
| hsa-miR-3648     | NM_033306 | CASP4 | 0.000789679 | 5UTR |
| hsa-miR-3649     | NM_033306 | CASP4 | 0.001160472 | CDS  |
| hsa-miR-3652     | NM_033306 | CASP4 | 0.006538049 | CDS  |
| hsa-miR-3655     | NM_033306 | CASP4 | 0.000918596 | CDS  |
| hsa-miR-3659     | NM_033306 | CASP4 | 2.27E-06    | CDS  |
| hsa-miR-3660     | NM_033306 | CASP4 | 0.05617181  | 5UTR |
| hsa-miR-3661     | NM_033306 | CASP4 | 0.000833903 | 5UTR |
| hsa-miR-3663-5p  | NM_033306 | CASP4 | 0.000231173 | CDS  |
| hsa-miR-3663-5p  | NM_033306 | CASP4 | 0.0218458   | 3UTR |
| hsa-miR-3663-3p  | NM_033306 | CASP4 | 4.82E-05    | CDS  |
| hsa-miR-3664-5p  | NM_033306 | CASP4 | 0.01825111  | 3UTR |
| hsa-miR-3665     | NM_033306 | CASP4 | 0.153048    | CDS  |
| hsa-miR-3665     | NM_033306 | CASP4 | 0.001645968 | 5UTR |
| hsa-miR-3665     | NM_033306 | CASP4 | 0.000689104 | 3UTR |
| hsa-miR-3665     | NM_033306 | CASP4 | 0.000618857 | CDS  |
| hsa-miR-3667-5p  | NM_033306 | CASP4 | 0.000473483 | 5UTR |
| hsa-miR-3667-3p  | NM_033306 | CASP4 | 0.003929355 | CDS  |
| hsa-miR-3670     | NM_033306 | CASP4 | 0.01085729  | CDS  |
| hsa-miR-3670     | NM_033306 | CASP4 | 0.002698706 | CDS  |
| hsa-miR-3675-5p  | NM_033306 | CASP4 | 0.01804151  | CDS  |
| hsa-miR-3677-5p  | NM_033306 | CASP4 | 0.000530791 | CDS  |
| hsa-miR-3678-3p  | NM_033306 | CASP4 | 0.002472239 | 5UTR |
| hsa-miR-3679-5p  | NM_033306 | CASP4 | 0.006276804 | CDS  |
| hsa-miR-3679-5p  | NM_033306 | CASP4 | 0.002861213 | CDS  |
| hsa-miR-3679-3p  | NM_033306 | CASP4 | 0.000804351 | CDS  |
| hsa-miR-3680-3p  | NM_033306 | CASP4 | 0.000706898 | CDS  |
| hsa-miR-3680-3p  | NM_033306 | CASP4 | 0.06220463  | CDS  |
| hsa-miR-3682-3p  | NM_033306 | CASP4 | 0.001680409 | CDS  |
| hsa-miR-3688-5p  | NM_033306 | CASP4 | 0.000530791 | CDS  |
| hsa-miR-3688-3p  | NM_033306 | CASP4 | 0.003167914 | 5UTR |
| hsa-miR-3689a-5p | NM_033306 | CASP4 | 0.004891425 | CDS  |
| hsa-miR-3689a-5p | NM_033306 | CASP4 | 3.30E-05    | CDS  |
| hsa-miR-3689a-3p | NM_033306 | CASP4 | 0.02723061  | CDS  |
| hsa-miR-3689a-3p | NM_033306 | CASP4 | 0.157008    | CDS  |
| hsa-miR-3690     | NM_033306 | CASP4 | 0.000836616 | CDS  |
| hsa-miR-3690     | NM_033306 | CASP4 | 0.001474321 | CDS  |
| hsa-miR-3692-5p  | NM_033306 | CASP4 | 0.002982281 | CDS  |
| hsa-miR-3180     | NM_033306 | CASP4 | 0.08287535  | 5UTR |
| hsa-miR-3180     | NM_033306 | CASP4 | 0.001637462 | CDS  |
| hsa-miR-3907     | NM_033306 | CASP4 | 0.000125909 | CDS  |

|                   |           |       |             |      |
|-------------------|-----------|-------|-------------|------|
| hsa-miR-3907      | NM_033306 | CASP4 | 0.000661315 | 3UTR |
| hsa-miR-3689b-5p  | NM_033306 | CASP4 | 0.004891425 | CDS  |
| hsa-miR-3689b-5p  | NM_033306 | CASP4 | 3.30E-05    | CDS  |
| hsa-miR-3689b-3p  | NM_033306 | CASP4 | 0.157008    | CDS  |
| hsa-miR-3689b-3p  | NM_033306 | CASP4 | 0.02723061  | CDS  |
| hsa-miR-3689b-3p  | NM_033306 | CASP4 | 0.005953452 | 3UTR |
| hsa-miR-3909      | NM_033306 | CASP4 | 4.32E-05    | CDS  |
| hsa-miR-3909      | NM_033306 | CASP4 | 5.42E-05    | CDS  |
| hsa-miR-3911      | NM_033306 | CASP4 | 0.00275918  | CDS  |
| hsa-miR-3917      | NM_033306 | CASP4 | 0.009826038 | CDS  |
| hsa-miR-3917      | NM_033306 | CASP4 | 0.000604446 | CDS  |
| hsa-miR-3918      | NM_033306 | CASP4 | 0.000891406 | CDS  |
| hsa-miR-3150b-5p  | NM_033306 | CASP4 | 0.001058085 | CDS  |
| hsa-miR-3150b-3p  | NM_033306 | CASP4 | 0.003325874 | 5UTR |
| hsa-miR-3925-5p   | NM_033306 | CASP4 | 0.07838235  | CDS  |
| hsa-miR-3928-3p   | NM_033306 | CASP4 | 8.44E-05    | CDS  |
| hsa-miR-3929      | NM_033306 | CASP4 | 0.001057457 | CDS  |
| hsa-miR-3934-5p   | NM_033306 | CASP4 | 2.78E-05    | CDS  |
| hsa-miR-3934-3p   | NM_033306 | CASP4 | 0.000406052 | CDS  |
| hsa-miR-3934-3p   | NM_033306 | CASP4 | 0.003175839 | CDS  |
| hsa-miR-3937      | NM_033306 | CASP4 | 0.2003249   | 3UTR |
| hsa-miR-3937      | NM_033306 | CASP4 | 0.000592024 | CDS  |
| hsa-miR-3939      | NM_033306 | CASP4 | 0.000131593 | CDS  |
| hsa-miR-3940-5p   | NM_033306 | CASP4 | 0.01274028  | CDS  |
| hsa-miR-3940-5p   | NM_033306 | CASP4 | 0.005953452 | 3UTR |
| hsa-miR-3940-5p   | NM_033306 | CASP4 | 1.84E-05    | 5UTR |
| hsa-miR-3940-3p   | NM_033306 | CASP4 | 0.000789679 | 5UTR |
| hsa-miR-3943      | NM_033306 | CASP4 | 8.39E-06    | CDS  |
| hsa-miR-3943      | NM_033306 | CASP4 | 0.007399047 | CDS  |
| hsa-miR-3944-3p   | NM_033306 | CASP4 | 0.006819084 | 3UTR |
| hsa-miR-3945      | NM_033306 | CASP4 | 0.008948377 | CDS  |
| hsa-miR-642b-5p   | NM_033306 | CASP4 | 0.001427036 | CDS  |
| hsa-miR-642b-3p   | NM_033306 | CASP4 | 0.1249703   | 5UTR |
| hsa-miR-550b-2-5p | NM_033306 | CASP4 | 0.000833903 | 5UTR |
| hsa-miR-550b-2-5p | NM_033306 | CASP4 | 0.000248906 | CDS  |
| hsa-miR-548aa     | NM_033306 | CASP4 | 0.002981617 | CDS  |
| hsa-miR-548o-5p   | NM_033306 | CASP4 | 0.153048    | CDS  |
| hsa-miR-1268b     | NM_033306 | CASP4 | 0.005546619 | CDS  |
| hsa-miR-378g      | NM_033306 | CASP4 | 0.01923861  | 3UTR |
| hsa-miR-378g      | NM_033306 | CASP4 | 0.004080075 | CDS  |
| hsa-miR-4425      | NM_033306 | CASP4 | 0.000833903 | 5UTR |
| hsa-miR-4425      | NM_033306 | CASP4 | 0.002429208 | CDS  |
| hsa-miR-4429      | NM_033306 | CASP4 | 0.0218458   | 3UTR |
| hsa-miR-4433a-3p  | NM_033306 | CASP4 | 0.001680409 | CDS  |



|                  |           |       |             |      |
|------------------|-----------|-------|-------------|------|
| hsa-miR-4433a-3p | NM_033306 | CASP4 | 0.004404006 | CDS  |
| hsa-miR-4436a    | NM_033306 | CASP4 | 0.006733282 | CDS  |
| hsa-miR-4436a    | NM_033306 | CASP4 | 0.00023335  | CDS  |
| hsa-miR-4437     | NM_033306 | CASP4 | 0.005975597 | 5UTR |
| hsa-miR-4439     | NM_033306 | CASP4 | 0.004446168 | CDS  |
| hsa-miR-4440     | NM_033306 | CASP4 | 0.01298236  | 3UTR |
| hsa-miR-4440     | NM_033306 | CASP4 | 0.001431946 | CDS  |
| hsa-miR-4440     | NM_033306 | CASP4 | 4.15E-05    | 5UTR |
| hsa-miR-4441     | NM_033306 | CASP4 | 0.001680409 | CDS  |
| hsa-miR-4441     | NM_033306 | CASP4 | 0.007756272 | 5UTR |
| hsa-miR-4443     | NM_033306 | CASP4 | 0.005060872 | 3UTR |
| hsa-miR-4443     | NM_033306 | CASP4 | 0.000844485 | CDS  |
| hsa-miR-4443     | NM_033306 | CASP4 | 0.157008    | CDS  |
| hsa-miR-4445-5p  | NM_033306 | CASP4 | 0.008535009 | CDS  |
| hsa-miR-4446-5p  | NM_033306 | CASP4 | 0.001494617 | CDS  |
| hsa-miR-4446-3p  | NM_033306 | CASP4 | 2.78E-05    | CDS  |
| hsa-miR-4446-3p  | NM_033306 | CASP4 | 4.39E-05    | CDS  |
| hsa-miR-4448     | NM_033306 | CASP4 | 0.01017319  | CDS  |
| hsa-miR-4448     | NM_033306 | CASP4 | 0.000635321 | 3UTR |
| hsa-miR-4449     | NM_033306 | CASP4 | 0.01412757  | 3UTR |
| hsa-miR-4449     | NM_033306 | CASP4 | 0.002186513 | CDS  |
| hsa-miR-548ag    | NM_033306 | CASP4 | 0.009503041 | CDS  |
| hsa-miR-548ag    | NM_033306 | CASP4 | 0.1530227   | CDS  |
| hsa-miR-4450     | NM_033306 | CASP4 | 0.000590352 | 5UTR |
| hsa-miR-4450     | NM_033306 | CASP4 | 0.006415714 | 5UTR |
| hsa-miR-4450     | NM_033306 | CASP4 | 0.5664282   | CDS  |
| hsa-miR-4450     | NM_033306 | CASP4 | 0.01506736  | CDS  |
| hsa-miR-4452     | NM_033306 | CASP4 | 0.002099401 | 5UTR |
| hsa-miR-4453     | NM_033306 | CASP4 | 0.000309971 | CDS  |
| hsa-miR-4455     | NM_033306 | CASP4 | 0.01076079  | CDS  |
| hsa-miR-4456     | NM_033306 | CASP4 | 0.002821145 | CDS  |
| hsa-miR-4456     | NM_033306 | CASP4 | 0.001058085 | CDS  |
| hsa-miR-4456     | NM_033306 | CASP4 | 0.000836616 | CDS  |
| hsa-miR-4458     | NM_033306 | CASP4 | 0.1524418   | CDS  |
| hsa-miR-4458     | NM_033306 | CASP4 | 0.002150872 | CDS  |
| hsa-miR-4460     | NM_033306 | CASP4 | 0.001312874 | CDS  |
| hsa-miR-378h     | NM_033306 | CASP4 | 0.02723061  | CDS  |
| hsa-miR-3135b    | NM_033306 | CASP4 | 0.000314076 | CDS  |
| hsa-miR-3135b    | NM_033306 | CASP4 | 0.006538049 | 3UTR |
| hsa-miR-4462     | NM_033306 | CASP4 | 0.005180042 | 5UTR |
| hsa-miR-4463     | NM_033306 | CASP4 | 0.000429816 | CDS  |
| hsa-miR-4463     | NM_033306 | CASP4 | 0.006733282 | CDS  |
| hsa-miR-4464     | NM_033306 | CASP4 | 3.43E-05    | CDS  |
| hsa-miR-4465     | NM_033306 | CASP4 | 0.003717217 | 5UTR |

|                 |           |       |             |      |
|-----------------|-----------|-------|-------------|------|
| hsa-miR-4466    | NM_033306 | CASP4 | 0.006830788 | 5UTR |
| hsa-miR-4468    | NM_033306 | CASP4 | 0.002698706 | CDS  |
| hsa-miR-4469    | NM_033306 | CASP4 | 0.00011745  | CDS  |
| hsa-miR-4469    | NM_033306 | CASP4 | 0.01853112  | CDS  |
| hsa-miR-4472    | NM_033306 | CASP4 | 0.5825232   | CDS  |
| hsa-miR-4474-3p | NM_033306 | CASP4 | 0.000164883 | CDS  |
| hsa-miR-4476    | NM_033306 | CASP4 | 0.001680409 | CDS  |
| hsa-miR-4478    | NM_033306 | CASP4 | 0.001893298 | CDS  |
| hsa-miR-3689c   | NM_033306 | CASP4 | 0.157008    | CDS  |
| hsa-miR-3689c   | NM_033306 | CASP4 | 0.02723061  | CDS  |
| hsa-miR-3689c   | NM_033306 | CASP4 | 0.005953452 | 3UTR |
| hsa-miR-3689e   | NM_033306 | CASP4 | 0.004891425 | CDS  |
| hsa-miR-3689e   | NM_033306 | CASP4 | 3.30E-05    | CDS  |
| hsa-miR-3155b   | NM_033306 | CASP4 | 0.001474321 | CDS  |
| hsa-miR-3155b   | NM_033306 | CASP4 | 0.002981617 | CDS  |
| hsa-miR-4481    | NM_033306 | CASP4 | 0.005060872 | 3UTR |
| hsa-miR-4482-5p | NM_033306 | CASP4 | 2.02E-05    | CDS  |
| hsa-miR-4482-3p | NM_033306 | CASP4 | 0.000135284 | CDS  |
| hsa-miR-4483    | NM_033306 | CASP4 | 0.5672603   | CDS  |
| hsa-miR-4483    | NM_033306 | CASP4 | 0.1524418   | CDS  |
| hsa-miR-4485-3p | NM_033306 | CASP4 | 0.000891406 | CDS  |
| hsa-miR-4486    | NM_033306 | CASP4 | 0.0218458   | 3UTR |
| hsa-miR-4487    | NM_033306 | CASP4 | 0.000723216 | CDS  |
| hsa-miR-4488    | NM_033306 | CASP4 | 0.005208109 | CDS  |
| hsa-miR-4488    | NM_033306 | CASP4 | 0.01469811  | CDS  |
| hsa-miR-4492    | NM_033306 | CASP4 | 0.005598497 | CDS  |
| hsa-miR-4492    | NM_033306 | CASP4 | 0.002150872 | CDS  |
| hsa-miR-4493    | NM_033306 | CASP4 | 0.01017319  | CDS  |
| hsa-miR-4493    | NM_033306 | CASP4 | 0.001117349 | CDS  |
| hsa-miR-4494    | NM_033306 | CASP4 | 0.001474321 | CDS  |
| hsa-miR-4496    | NM_033306 | CASP4 | 0.001893298 | CDS  |
| hsa-miR-4496    | NM_033306 | CASP4 | 0.001114577 | 5UTR |
| hsa-miR-4497    | NM_033306 | CASP4 | 0.000637219 | 3UTR |
| hsa-miR-4498    | NM_033306 | CASP4 | 0.00027619  | CDS  |
| hsa-miR-4498    | NM_033306 | CASP4 | 0.006819084 | 3UTR |
| hsa-miR-4498    | NM_033306 | CASP4 | 0.005975597 | 5UTR |
| hsa-miR-4499    | NM_033306 | CASP4 | 0.006733282 | CDS  |
| hsa-miR-4500    | NM_033306 | CASP4 | 0.01506736  | CDS  |
| hsa-miR-4502    | NM_033306 | CASP4 | 0.2401151   | 3UTR |
| hsa-miR-4502    | NM_033306 | CASP4 | 0.1229816   | CDS  |
| hsa-miR-4505    | NM_033306 | CASP4 | 0.006538049 | 3UTR |
| hsa-miR-2392    | NM_033306 | CASP4 | 4.39E-05    | CDS  |
| hsa-miR-2392    | NM_033306 | CASP4 | 0.004667567 | CDS  |
| hsa-miR-2392    | NM_033306 | CASP4 | 0.001680409 | CDS  |

|                  |           |       |             |      |
|------------------|-----------|-------|-------------|------|
| hsa-miR-4507     | NM_033306 | CASP4 | 0.006819084 | CDS  |
| hsa-miR-4508     | NM_033306 | CASP4 | 0.005598497 | CDS  |
| hsa-miR-4508     | NM_033306 | CASP4 | 2.70E-05    | CDS  |
| hsa-miR-4515     | NM_033306 | CASP4 | 0.000353171 | CDS  |
| hsa-miR-4518     | NM_033306 | CASP4 | 0.000789679 | 5UTR |
| hsa-miR-4521     | NM_033306 | CASP4 | 0.002113119 | 5UTR |
| hsa-miR-4521     | NM_033306 | CASP4 | 0.000172777 | CDS  |
| hsa-miR-4522     | NM_033306 | CASP4 | 6.22E-06    | CDS  |
| hsa-miR-4523     | NM_033306 | CASP4 | 0.08272899  | 5UTR |
| hsa-miR-4524a-3p | NM_033306 | CASP4 | 0.01324213  | 5UTR |
| hsa-miR-4525     | NM_033306 | CASP4 | 0.005060872 | 3UTR |
| hsa-miR-4525     | NM_033306 | CASP4 | 8.44E-05    | CDS  |
| hsa-miR-4525     | NM_033306 | CASP4 | 0.02336121  | CDS  |
| hsa-miR-4525     | NM_033306 | CASP4 | 0.5672603   | CDS  |
| hsa-miR-4526     | NM_033306 | CASP4 | 0.002303406 | CDS  |
| hsa-miR-4527     | NM_033306 | CASP4 | 0.08940229  | CDS  |
| hsa-miR-4529-3p  | NM_033306 | CASP4 | 0.000709764 | 5UTR |
| hsa-miR-4529-3p  | NM_033306 | CASP4 | 4.48E-05    | CDS  |
| hsa-miR-4530     | NM_033306 | CASP4 | 0.0173686   | 5UTR |
| hsa-miR-4530     | NM_033306 | CASP4 | 0.1087187   | 5UTR |
| hsa-miR-4531     | NM_033306 | CASP4 | 0.01128763  | 5UTR |
| hsa-miR-4533     | NM_033306 | CASP4 | 0.02264435  | CDS  |
| hsa-miR-4533     | NM_033306 | CASP4 | 0.000268079 | CDS  |
| hsa-miR-4534     | NM_033306 | CASP4 | 0.000556588 | CDS  |
| hsa-miR-4534     | NM_033306 | CASP4 | 0.1044673   | CDS  |
| hsa-miR-4534     | NM_033306 | CASP4 | 0.01753545  | 3UTR |
| hsa-miR-548am-5p | NM_033306 | CASP4 | 0.153048    | CDS  |
| hsa-miR-1587     | NM_033306 | CASP4 | 0.006819084 | CDS  |
| hsa-miR-4538     | NM_033306 | CASP4 | 0.01753545  | 3UTR |
| hsa-miR-4539     | NM_033306 | CASP4 | 0.000635321 | 3UTR |
| hsa-miR-4540     | NM_033306 | CASP4 | 0.01629919  | CDS  |
| hsa-miR-3960     | NM_033306 | CASP4 | 9.59E-05    | CDS  |
| hsa-miR-3972     | NM_033306 | CASP4 | 0.002228703 | CDS  |
| hsa-miR-3972     | NM_033306 | CASP4 | 0.007399047 | CDS  |
| hsa-miR-3972     | NM_033306 | CASP4 | 0.000268314 | CDS  |
| hsa-miR-3973     | NM_033306 | CASP4 | 0.0226841   | CDS  |
| hsa-miR-3974     | NM_033306 | CASP4 | 0.000781748 | CDS  |
| hsa-miR-3976     | NM_033306 | CASP4 | 0.002558787 | CDS  |
| hsa-miR-3978     | NM_033306 | CASP4 | 0.03249281  | 5UTR |
| hsa-miR-4632-5p  | NM_033306 | CASP4 | 0.000717477 | CDS  |
| hsa-miR-4632-5p  | NM_033306 | CASP4 | 0.002868814 | CDS  |
| hsa-miR-4632-5p  | NM_033306 | CASP4 | 0.005208109 | CDS  |
| hsa-miR-4633-5p  | NM_033306 | CASP4 | 0.000963271 | CDS  |
| hsa-miR-4633-3p  | NM_033306 | CASP4 | 0.002868814 | CDS  |

|                  |           |       |             |      |
|------------------|-----------|-------|-------------|------|
| hsa-miR-4634     | NM_033306 | CASP4 | 0.000511411 | 5UTR |
| hsa-miR-4638-5p  | NM_033306 | CASP4 | 0.01923861  | 3UTR |
| hsa-miR-4638-3p  | NM_033306 | CASP4 | 0.000892483 | 5UTR |
| hsa-miR-4640-5p  | NM_033306 | CASP4 | 1.84E-05    | 5UTR |
| hsa-miR-4640-5p  | NM_033306 | CASP4 | 0.000789679 | 5UTR |
| hsa-miR-4640-5p  | NM_033306 | CASP4 | 0.005975597 | 5UTR |
| hsa-miR-4640-5p  | NM_033306 | CASP4 | 0.002526276 | CDS  |
| hsa-miR-4641     | NM_033306 | CASP4 | 0.08945923  | CDS  |
| hsa-miR-4642     | NM_033306 | CASP4 | 0.0226841   | CDS  |
| hsa-miR-4644     | NM_033306 | CASP4 | 0.08287535  | 5UTR |
| hsa-miR-4646-5p  | NM_033306 | CASP4 | 0.002113119 | 5UTR |
| hsa-miR-4647     | NM_033306 | CASP4 | 0.07611103  | CDS  |
| hsa-miR-4647     | NM_033306 | CASP4 | 0.03313369  | CDS  |
| hsa-miR-4649-5p  | NM_033306 | CASP4 | 0.006276804 | CDS  |
| hsa-miR-4649-5p  | NM_033306 | CASP4 | 0.0911618   | 5UTR |
| hsa-miR-4651     | NM_033306 | CASP4 | 0.006415714 | 5UTR |
| hsa-miR-4652-3p  | NM_033306 | CASP4 | 5.70E-05    | CDS  |
| hsa-miR-4653-3p  | NM_033306 | CASP4 | 0.005060872 | CDS  |
| hsa-miR-4653-3p  | NM_033306 | CASP4 | 5.42E-05    | CDS  |
| hsa-miR-4654     | NM_033306 | CASP4 | 0.01359137  | 5UTR |
| hsa-miR-4654     | NM_033306 | CASP4 | 0.1240252   | CDS  |
| hsa-miR-4654     | NM_033306 | CASP4 | 0.000353171 | CDS  |
| hsa-miR-4655-5p  | NM_033306 | CASP4 | 0.000172777 | CDS  |
| hsa-miR-4655-5p  | NM_033306 | CASP4 | 0.000526877 | CDS  |
| hsa-miR-4655-5p  | NM_033306 | CASP4 | 0.04080268  | CDS  |
| hsa-miR-4656     | NM_033306 | CASP4 | 0.003029624 | CDS  |
| hsa-miR-4656     | NM_033306 | CASP4 | 0.009782782 | CDS  |
| hsa-miR-4657     | NM_033306 | CASP4 | 0.0357771   | CDS  |
| hsa-miR-4658     | NM_033306 | CASP4 | 0.00293118  | CDS  |
| hsa-miR-4659a-5p | NM_033306 | CASP4 | 1.28E-05    | 5UTR |
| hsa-miR-4661-5p  | NM_033306 | CASP4 | 0.01713811  | CDS  |
| hsa-miR-4661-3p  | NM_033306 | CASP4 | 9.12E-06    | CDS  |
| hsa-miR-4659b-3p | NM_033306 | CASP4 | 0.000124817 | CDS  |
| hsa-miR-4659b-3p | NM_033306 | CASP4 | 0.000299959 | CDS  |
| hsa-miR-4663     | NM_033306 | CASP4 | 0.01082276  | CDS  |
| hsa-miR-4667-5p  | NM_033306 | CASP4 | 0.001482999 | CDS  |
| hsa-miR-4667-3p  | NM_033306 | CASP4 | 0.005658901 | CDS  |
| hsa-miR-4667-3p  | NM_033306 | CASP4 | 8.36E-06    | CDS  |
| hsa-miR-4669     | NM_033306 | CASP4 | 0.000638659 | 3UTR |
| hsa-miR-4669     | NM_033306 | CASP4 | 0.000833903 | 5UTR |
| hsa-miR-4673     | NM_033306 | CASP4 | 0.000470238 | CDS  |
| hsa-miR-4674     | NM_033306 | CASP4 | 0.005975597 | 5UTR |
| hsa-miR-4676-5p  | NM_033306 | CASP4 | 0.00215005  | CDS  |
| hsa-miR-4677-5p  | NM_033306 | CASP4 | 0.000174181 | CDS  |

|                 |           |       |             |      |
|-----------------|-----------|-------|-------------|------|
| hsa-miR-4677-3p | NM_033306 | CASP4 | 1.54E-05    | 5UTR |
| hsa-miR-4682    | NM_033306 | CASP4 | 0.000135284 | CDS  |
| hsa-miR-4683    | NM_033306 | CASP4 | 0.01128763  | 5UTR |
| hsa-miR-4684-5p | NM_033306 | CASP4 | 0.000386263 | CDS  |
| hsa-miR-4685-5p | NM_033306 | CASP4 | 0.002982281 | CDS  |
| hsa-miR-4685-5p | NM_033306 | CASP4 | 4.84E-05    | CDS  |
| hsa-miR-4686    | NM_033306 | CASP4 | 0.00323507  | 5UTR |
| hsa-miR-4686    | NM_033306 | CASP4 | 0.0218458   | 3UTR |
| hsa-miR-4687-3p | NM_033306 | CASP4 | 0.0001889   | 5UTR |
| hsa-miR-4687-3p | NM_033306 | CASP4 | 0.0911618   | 5UTR |
| hsa-miR-4687-3p | NM_033306 | CASP4 | 0.000346078 | CDS  |
| hsa-miR-1343-5p | NM_033306 | CASP4 | 0.000318808 | CDS  |
| hsa-miR-1343-5p | NM_033306 | CASP4 | 0.001482999 | CDS  |
| hsa-miR-4688    | NM_033306 | CASP4 | 0.001160472 | CDS  |
| hsa-miR-4688    | NM_033306 | CASP4 | 4.36E-05    | CDS  |
| hsa-miR-4688    | NM_033306 | CASP4 | 0.007400426 | 5UTR |
| hsa-miR-4689    | NM_033306 | CASP4 | 0.002861213 | CDS  |
| hsa-miR-4689    | NM_033306 | CASP4 | 0.001057457 | CDS  |
| hsa-miR-4689    | NM_033306 | CASP4 | 0.04654808  | CDS  |
| hsa-miR-4690-5p | NM_033306 | CASP4 | 0.01753545  | 3UTR |
| hsa-miR-4691-5p | NM_033306 | CASP4 | 9.79E-05    | CDS  |
| hsa-miR-4691-5p | NM_033306 | CASP4 | 0.00059852  | CDS  |
| hsa-miR-4691-3p | NM_033306 | CASP4 | 0.000614096 | CDS  |
| hsa-miR-4692    | NM_033306 | CASP4 | 0.003677598 | CDS  |
| hsa-miR-4695-5p | NM_033306 | CASP4 | 0.00023335  | CDS  |
| hsa-miR-4695-5p | NM_033306 | CASP4 | 0.000867817 | CDS  |
| hsa-miR-4695-5p | NM_033306 | CASP4 | 0.005953452 | 3UTR |
| hsa-miR-4697-5p | NM_033306 | CASP4 | 0.008380416 | 5UTR |
| hsa-miR-4697-3p | NM_033306 | CASP4 | 2.55E-06    | CDS  |
| hsa-miR-4700-5p | NM_033306 | CASP4 | 0.007685493 | CDS  |
| hsa-miR-4700-3p | NM_033306 | CASP4 | 2.83E-05    | CDS  |
| hsa-miR-4706    | NM_033306 | CASP4 | 0.006369709 | 3UTR |
| hsa-miR-4707-5p | NM_033306 | CASP4 | 0.00307967  | CDS  |
| hsa-miR-4707-5p | NM_033306 | CASP4 | 8.39E-06    | CDS  |
| hsa-miR-4708-3p | NM_033306 | CASP4 | 0.03057205  | CDS  |
| hsa-miR-4709-3p | NM_033306 | CASP4 | 0.001806281 | CDS  |
| hsa-miR-4709-3p | NM_033306 | CASP4 | 0.01490447  | 3UTR |
| hsa-miR-4710    | NM_033306 | CASP4 | 0.006819084 | 3UTR |
| hsa-miR-4711-5p | NM_033306 | CASP4 | 0.000268314 | CDS  |
| hsa-miR-4711-3p | NM_033306 | CASP4 | 0.000633984 | CDS  |
| hsa-miR-4711-3p | NM_033306 | CASP4 | 0.002865209 | 5UTR |
| hsa-miR-4713-3p | NM_033306 | CASP4 | 0.02167154  | 5UTR |
| hsa-miR-4713-3p | NM_033306 | CASP4 | 0.001503379 | 5UTR |
| hsa-miR-4714-5p | NM_033306 | CASP4 | 5.70E-05    | CDS  |

|                 |           |       |             |      |
|-----------------|-----------|-------|-------------|------|
| hsa-miR-4714-3p | NM_033306 | CASP4 | 4.93E-05    | CDS  |
| hsa-miR-4714-3p | NM_033306 | CASP4 | 0.000860321 | CDS  |
| hsa-miR-4714-3p | NM_033306 | CASP4 | 9.44E-06    | CDS  |
| hsa-miR-4715-3p | NM_033306 | CASP4 | 4.32E-05    | CDS  |
| hsa-miR-4716-3p | NM_033306 | CASP4 | 0.008380416 | 5UTR |
| hsa-miR-3529-5p | NM_033306 | CASP4 | 0.008220982 | CDS  |
| hsa-miR-4717-3p | NM_033306 | CASP4 | 0.01298236  | 3UTR |
| hsa-miR-4717-3p | NM_033306 | CASP4 | 0.01093692  | CDS  |
| hsa-miR-4718    | NM_033306 | CASP4 | 0.005470165 | CDS  |
| hsa-miR-4720-5p | NM_033306 | CASP4 | 0.01194194  | CDS  |
| hsa-miR-4721    | NM_033306 | CASP4 | 0.004304008 | CDS  |
| hsa-miR-4721    | NM_033306 | CASP4 | 0.02104202  | CDS  |
| hsa-miR-4722-5p | NM_033306 | CASP4 | 0.005953452 | 3UTR |
| hsa-miR-4722-3p | NM_033306 | CASP4 | 0.002982281 | CDS  |
| hsa-miR-4723-5p | NM_033306 | CASP4 | 2.14E-05    | CDS  |
| hsa-miR-4723-3p | NM_033306 | CASP4 | 0.000386263 | CDS  |
| hsa-miR-4724-5p | NM_033306 | CASP4 | 0.006931316 | CDS  |
| hsa-miR-4724-3p | NM_033306 | CASP4 | 0.001765413 | CDS  |
| hsa-miR-4724-3p | NM_033306 | CASP4 | 0.1494029   | 5UTR |
| hsa-miR-4725-5p | NM_033306 | CASP4 | 9.12E-06    | CDS  |
| hsa-miR-4725-3p | NM_033306 | CASP4 | 0.00215005  | CDS  |
| hsa-miR-4726-5p | NM_033306 | CASP4 | 0.000781748 | CDS  |
| hsa-miR-4726-5p | NM_033306 | CASP4 | 0.000789679 | 5UTR |
| hsa-miR-4726-3p | NM_033306 | CASP4 | 2.02E-05    | CDS  |
| hsa-miR-4727-5p | NM_033306 | CASP4 | 0.001944551 | CDS  |
| hsa-miR-4728-5p | NM_033306 | CASP4 | 0.005953452 | 3UTR |
| hsa-miR-4728-5p | NM_033306 | CASP4 | 0.02456692  | CDS  |
| hsa-miR-4728-3p | NM_033306 | CASP4 | 2.83E-05    | CDS  |
| hsa-miR-4730    | NM_033306 | CASP4 | 0.000449296 | CDS  |
| hsa-miR-4731-5p | NM_033306 | CASP4 | 0.005133538 | CDS  |
| hsa-miR-4731-5p | NM_033306 | CASP4 | 0.157008    | CDS  |
| hsa-miR-4731-3p | NM_033306 | CASP4 | 0.001281911 | 5UTR |
| hsa-miR-4732-5p | NM_033306 | CASP4 | 0.001482999 | CDS  |
| hsa-miR-4732-3p | NM_033306 | CASP4 | 8.39E-06    | CDS  |
| hsa-miR-4733-5p | NM_033306 | CASP4 | 0.001839698 | CDS  |
| hsa-miR-4733-3p | NM_033306 | CASP4 | 0.001365539 | 5UTR |
| hsa-miR-4734    | NM_033306 | CASP4 | 1.81E-05    | CDS  |
| hsa-miR-4735-5p | NM_033306 | CASP4 | 0.000489407 | 5UTR |
| hsa-miR-4735-3p | NM_033306 | CASP4 | 0.000662504 | 3UTR |
| hsa-miR-4736    | NM_033306 | CASP4 | 0.005953452 | 3UTR |
| hsa-miR-4737    | NM_033306 | CASP4 | 0.000234425 | CDS  |
| hsa-miR-3064-5p | NM_033306 | CASP4 | 0.01923861  | 3UTR |
| hsa-miR-3064-5p | NM_033306 | CASP4 | 0.000189105 | CDS  |
| hsa-miR-3064-5p | NM_033306 | CASP4 | 0.000860321 | CDS  |

|                 |           |       |             |      |
|-----------------|-----------|-------|-------------|------|
| hsa-miR-3064-3p | NM_033306 | CASP4 | 0.001173278 | 5UTR |
| hsa-miR-4738-5p | NM_033306 | CASP4 | 2.83E-05    | CDS  |
| hsa-miR-4738-3p | NM_033306 | CASP4 | 1.81E-05    | CDS  |
| hsa-miR-4738-3p | NM_033306 | CASP4 | 0.000892483 | 5UTR |
| hsa-miR-4739    | NM_033306 | CASP4 | 0.000592024 | CDS  |
| hsa-miR-4740-3p | NM_033306 | CASP4 | 0.000188063 | CDS  |
| hsa-miR-4740-3p | NM_033306 | CASP4 | 0.000789679 | 5UTR |
| hsa-miR-4741    | NM_033306 | CASP4 | 0.002303406 | CDS  |
| hsa-miR-4743-5p | NM_033306 | CASP4 | 4.34E-05    | CDS  |
| hsa-miR-4745-5p | NM_033306 | CASP4 | 0.07838235  | CDS  |
| hsa-miR-4745-3p | NM_033306 | CASP4 | 6.22E-06    | CDS  |
| hsa-miR-4746-5p | NM_033306 | CASP4 | 0.003855371 | 5UTR |
| hsa-miR-4746-3p | NM_033306 | CASP4 | 0.000109679 | CDS  |
| hsa-miR-4746-3p | NM_033306 | CASP4 | 0.000652818 | 3UTR |
| hsa-miR-4747-5p | NM_033306 | CASP4 | 0.008948377 | CDS  |
| hsa-miR-4747-5p | NM_033306 | CASP4 | 0.0843973   | 5UTR |
| hsa-miR-4747-3p | NM_033306 | CASP4 | 0.000789679 | 5UTR |
| hsa-miR-4748    | NM_033306 | CASP4 | 0.00080334  | CDS  |
| hsa-miR-4748    | NM_033306 | CASP4 | 0.003428258 | CDS  |
| hsa-miR-4749-5p | NM_033306 | CASP4 | 0.001893298 | CDS  |
| hsa-miR-4750-5p | NM_033306 | CASP4 | 0.000604446 | CDS  |
| hsa-miR-4750-5p | NM_033306 | CASP4 | 0.009826038 | CDS  |
| hsa-miR-4750-3p | NM_033306 | CASP4 | 1.38E-05    | CDS  |
| hsa-miR-4751    | NM_033306 | CASP4 | 0.000141499 | CDS  |
| hsa-miR-4751    | NM_033306 | CASP4 | 8.44E-05    | CDS  |
| hsa-miR-4752    | NM_033306 | CASP4 | 0.000127802 | CDS  |
| hsa-miR-371b-5p | NM_033306 | CASP4 | 1.47E-05    | CDS  |
| hsa-miR-371b-3p | NM_033306 | CASP4 | 0.000833903 | 5UTR |
| hsa-miR-371b-3p | NM_033306 | CASP4 | 0.0002477   | CDS  |
| hsa-miR-371b-3p | NM_033306 | CASP4 | 0.000125909 | CDS  |
| hsa-miR-4755-5p | NM_033306 | CASP4 | 2.12E-05    | CDS  |
| hsa-miR-4755-3p | NM_033306 | CASP4 | 0.00293118  | CDS  |
| hsa-miR-499b-5p | NM_033306 | CASP4 | 0.00124429  | CDS  |
| hsa-miR-4757-5p | NM_033306 | CASP4 | 0.000141499 | CDS  |
| hsa-miR-4757-3p | NM_033306 | CASP4 | 0.01324213  | 5UTR |
| hsa-miR-4758-5p | NM_033306 | CASP4 | 0.006073437 | CDS  |
| hsa-miR-4758-5p | NM_033306 | CASP4 | 0.2935726   | CDS  |
| hsa-miR-4758-5p | NM_033306 | CASP4 | 0.000215353 | CDS  |
| hsa-miR-4758-3p | NM_033306 | CASP4 | 9.07E-06    | CDS  |
| hsa-miR-4761-3p | NM_033306 | CASP4 | 5.60E-05    | 5UTR |
| hsa-miR-4761-3p | NM_033306 | CASP4 | 0.02114427  | CDS  |
| hsa-miR-4763-5p | NM_033306 | CASP4 | 1.38E-05    | CDS  |
| hsa-miR-4763-3p | NM_033306 | CASP4 | 0.005953452 | CDS  |
| hsa-miR-4764-5p | NM_033306 | CASP4 | 0.0911618   | 5UTR |

|                  |           |       |             |      |
|------------------|-----------|-------|-------------|------|
| hsa-miR-4766-5p  | NM_033306 | CASP4 | 0.05121637  | 5UTR |
| hsa-miR-4766-3p  | NM_033306 | CASP4 | 0.000449296 | CDS  |
| hsa-miR-4767     | NM_033306 | CASP4 | 0.000131593 | CDS  |
| hsa-miR-4767     | NM_033306 | CASP4 | 0.02114427  | CDS  |
| hsa-miR-4768-5p  | NM_033306 | CASP4 | 3.16E-05    | CDS  |
| hsa-miR-4769-5p  | NM_033306 | CASP4 | 0.000592024 | CDS  |
| hsa-miR-4776-5p  | NM_033306 | CASP4 | 0.00011745  | CDS  |
| hsa-miR-4776-5p  | NM_033306 | CASP4 | 0.007927923 | 5UTR |
| hsa-miR-4778-3p  | NM_033306 | CASP4 | 0.3628757   | 5UTR |
| hsa-miR-4780     | NM_033306 | CASP4 | 8.36E-06    | CDS  |
| hsa-miR-4436b-3p | NM_033306 | CASP4 | 0.002698706 | CDS  |
| hsa-miR-4436b-3p | NM_033306 | CASP4 | 0.001680409 | CDS  |
| hsa-miR-4781-5p  | NM_033306 | CASP4 | 7.93E-05    | 5UTR |
| hsa-miR-4783-3p  | NM_033306 | CASP4 | 8.36E-06    | CDS  |
| hsa-miR-4783-3p  | NM_033306 | CASP4 | 0.01052851  | CDS  |
| hsa-miR-4784     | NM_033306 | CASP4 | 0.006276804 | 3UTR |
| hsa-miR-4784     | NM_033306 | CASP4 | 0.000218895 | CDS  |
| hsa-miR-1245b-3p | NM_033306 | CASP4 | 0.000200147 | CDS  |
| hsa-miR-2467-5p  | NM_033306 | CASP4 | 0.002728573 | CDS  |
| hsa-miR-2467-5p  | NM_033306 | CASP4 | 0.02104202  | CDS  |
| hsa-miR-2467-3p  | NM_033306 | CASP4 | 0.001057457 | CDS  |
| hsa-miR-2467-3p  | NM_033306 | CASP4 | 0.0911618   | 5UTR |
| hsa-miR-4786-5p  | NM_033306 | CASP4 | 2.05E-05    | CDS  |
| hsa-miR-4786-5p  | NM_033306 | CASP4 | 0.004304008 | CDS  |
| hsa-miR-4786-3p  | NM_033306 | CASP4 | 0.01128548  | CDS  |
| hsa-miR-4787-5p  | NM_033306 | CASP4 | 2.56E-05    | CDS  |
| hsa-miR-4787-5p  | NM_033306 | CASP4 | 0.005208109 | 3UTR |
| hsa-miR-4787-3p  | NM_033306 | CASP4 | 0.000369195 | CDS  |
| hsa-miR-4793-5p  | NM_033306 | CASP4 | 0.002186513 | CDS  |
| hsa-miR-4793-3p  | NM_033306 | CASP4 | 0.000706898 | CDS  |
| hsa-miR-4795-3p  | NM_033306 | CASP4 | 0.000725653 | CDS  |
| hsa-miR-4797-5p  | NM_033306 | CASP4 | 0.002487907 | CDS  |
| hsa-miR-4797-3p  | NM_033306 | CASP4 | 0.003849335 | CDS  |
| hsa-miR-4802-5p  | NM_033306 | CASP4 | 1.16E-05    | CDS  |
| hsa-miR-4999-5p  | NM_033306 | CASP4 | 0.07567372  | CDS  |
| hsa-miR-5000-5p  | NM_033306 | CASP4 | 0.1168332   | 5UTR |
| hsa-miR-5000-5p  | NM_033306 | CASP4 | 0.00293118  | CDS  |
| hsa-miR-5001-5p  | NM_033306 | CASP4 | 0.01804151  | CDS  |
| hsa-miR-5001-3p  | NM_033306 | CASP4 | 0.03592735  | CDS  |
| hsa-miR-5003-3p  | NM_033306 | CASP4 | 0.01114662  | CDS  |
| hsa-miR-5004-5p  | NM_033306 | CASP4 | 0.002861213 | CDS  |
| hsa-miR-5004-3p  | NM_033306 | CASP4 | 0.001021701 | CDS  |
| hsa-miR-5006-5p  | NM_033306 | CASP4 | 0.012822    | CDS  |
| hsa-miR-5007-5p  | NM_033306 | CASP4 | 0.000709764 | 5UTR |



|                  |           |       |             |      |
|------------------|-----------|-------|-------------|------|
| hsa-miR-5008-5p  | NM_033306 | CASP4 | 0.00438586  | CDS  |
| hsa-miR-5008-5p  | NM_033306 | CASP4 | 0.00080334  | CDS  |
| hsa-miR-5009-5p  | NM_033306 | CASP4 | 4.48E-05    | CDS  |
| hsa-miR-5010-5p  | NM_033306 | CASP4 | 0.00104551  | CDS  |
| hsa-miR-5010-5p  | NM_033306 | CASP4 | 0.02577456  | 5UTR |
| hsa-miR-5011-3p  | NM_033306 | CASP4 | 0.1867544   | 3UTR |
| hsa-miR-5047     | NM_033306 | CASP4 | 0.153048    | CDS  |
| hsa-miR-5087     | NM_033306 | CASP4 | 0.000169899 | CDS  |
| hsa-miR-5088-5p  | NM_033306 | CASP4 | 0.02617972  | CDS  |
| hsa-miR-5088-3p  | NM_033306 | CASP4 | 0.002311532 | CDS  |
| hsa-miR-5088-3p  | NM_033306 | CASP4 | 0.005475725 | CDS  |
| hsa-miR-5088-3p  | NM_033306 | CASP4 | 0.008718099 | CDS  |
| hsa-miR-5089-3p  | NM_033306 | CASP4 | 0.01462679  | CDS  |
| hsa-miR-5090     | NM_033306 | CASP4 | 0.000606734 | CDS  |
| hsa-miR-5090     | NM_033306 | CASP4 | 0.006415714 | 5UTR |
| hsa-miR-5093     | NM_033306 | CASP4 | 0.005953452 | CDS  |
| hsa-miR-5093     | NM_033306 | CASP4 | 0.003393045 | CDS  |
| hsa-miR-5188     | NM_033306 | CASP4 | 0.00013726  | CDS  |
| hsa-miR-5189-5p  | NM_033306 | CASP4 | 0.000526877 | CDS  |
| hsa-miR-5190     | NM_033306 | CASP4 | 0.000190781 | CDS  |
| hsa-miR-5190     | NM_033306 | CASP4 | 0.2935726   | CDS  |
| hsa-miR-5192     | NM_033306 | CASP4 | 0.002811797 | CDS  |
| hsa-miR-5192     | NM_033306 | CASP4 | 0.000771646 | 5UTR |
| hsa-miR-5193     | NM_033306 | CASP4 | 0.002870221 | CDS  |
| hsa-miR-5194     | NM_033306 | CASP4 | 0.01099641  | 5UTR |
| hsa-miR-5195-3p  | NM_033306 | CASP4 | 0.01114662  | CDS  |
| hsa-miR-5196-5p  | NM_033306 | CASP4 | 0.04098359  | 3UTR |
| hsa-miR-5196-5p  | NM_033306 | CASP4 | 0.003393045 | CDS  |
| hsa-miR-5197-3p  | NM_033306 | CASP4 | 0.001160472 | CDS  |
| hsa-miR-4524b-5p | NM_033306 | CASP4 | 0.006381234 | CDS  |
| hsa-miR-5571-3p  | NM_033306 | CASP4 | 0.000470238 | CDS  |
| hsa-miR-5100     | NM_033306 | CASP4 | 0.000325446 | CDS  |
| hsa-miR-5100     | NM_033306 | CASP4 | 0.000492618 | CDS  |
| hsa-miR-5100     | NM_033306 | CASP4 | 0.000137537 | CDS  |
| hsa-miR-5572     | NM_033306 | CASP4 | 0.001645588 | CDS  |
| hsa-miR-5572     | NM_033306 | CASP4 | 0.000844485 | CDS  |
| hsa-miR-664b-5p  | NM_033306 | CASP4 | 0.00438586  | CDS  |
| hsa-miR-5580-5p  | NM_033306 | CASP4 | 0.01082276  | CDS  |
| hsa-miR-5580-3p  | NM_033306 | CASP4 | 0.01004367  | CDS  |
| hsa-miR-5581-5p  | NM_033306 | CASP4 | 0.000725653 | CDS  |
| hsa-miR-5581-5p  | NM_033306 | CASP4 | 9.79E-05    | CDS  |
| hsa-miR-5581-3p  | NM_033306 | CASP4 | 0.000806233 | CDS  |
| hsa-miR-5582-3p  | NM_033306 | CASP4 | 0.000511411 | 5UTR |
| hsa-miR-5584-3p  | NM_033306 | CASP4 | 0.002731967 | 5UTR |

|                  |           |       |             |      |
|------------------|-----------|-------|-------------|------|
| hsa-miR-5587-3p  | NM_033306 | CASP4 | 0.00307967  | CDS  |
| hsa-miR-5587-3p  | NM_033306 | CASP4 | 0.003677598 | CDS  |
| hsa-miR-1295b-3p | NM_033306 | CASP4 | 0.000781748 | CDS  |
| hsa-miR-5589-5p  | NM_033306 | CASP4 | 0.006538049 | CDS  |
| hsa-miR-5591-5p  | NM_033306 | CASP4 | 0.004304008 | CDS  |
| hsa-miR-5681a    | NM_033306 | CASP4 | 2.56E-05    | CDS  |
| hsa-miR-5681a    | NM_033306 | CASP4 | 0.000427688 | CDS  |
| hsa-miR-5682     | NM_033306 | CASP4 | 4.82E-05    | CDS  |
| hsa-miR-5683     | NM_033306 | CASP4 | 0.000400512 | CDS  |
| hsa-miR-548ax    | NM_033306 | CASP4 | 0.1524418   | CDS  |
| hsa-miR-5697     | NM_033306 | CASP4 | 0.000505501 | CDS  |
| hsa-miR-5698     | NM_033306 | CASP4 | 0.000790121 | CDS  |
| hsa-miR-5699-3p  | NM_033306 | CASP4 | 0.001862046 | CDS  |
| hsa-miR-5699-3p  | NM_033306 | CASP4 | 0.000985936 | CDS  |
| hsa-miR-5702     | NM_033306 | CASP4 | 0.000108611 | CDS  |
| hsa-miR-5704     | NM_033306 | CASP4 | 0.000797533 | CDS  |
| hsa-miR-5705     | NM_033306 | CASP4 | 0.002289318 | 5UTR |
| hsa-miR-5739     | NM_033306 | CASP4 | 0.001893298 | CDS  |
| hsa-miR-5787     | NM_033306 | CASP4 | 0.006819084 | 3UTR |
| hsa-miR-5787     | NM_033306 | CASP4 | 0.006733282 | CDS  |
| hsa-miR-1199-5p  | NM_033306 | CASP4 | 0.003226944 | 5UTR |
| hsa-miR-6068     | NM_033306 | CASP4 | 2.27E-05    | CDS  |
| hsa-miR-6069     | NM_033306 | CASP4 | 0.006819084 | 3UTR |
| hsa-miR-6070     | NM_033306 | CASP4 | 0.002228703 | CDS  |
| hsa-miR-6070     | NM_033306 | CASP4 | 0.002728573 | CDS  |
| hsa-miR-6070     | NM_033306 | CASP4 | 0.01017319  | CDS  |
| hsa-miR-6072     | NM_033306 | CASP4 | 0.003175839 | CDS  |
| hsa-miR-6073     | NM_033306 | CASP4 | 0.000427688 | CDS  |
| hsa-miR-6074     | NM_033306 | CASP4 | 0.000604446 | CDS  |
| hsa-miR-6075     | NM_033306 | CASP4 | 0.0183131   | 5UTR |
| hsa-miR-6075     | NM_033306 | CASP4 | 0.000789679 | 5UTR |
| hsa-miR-6076     | NM_033306 | CASP4 | 0.002303406 | CDS  |
| hsa-miR-6076     | NM_033306 | CASP4 | 0.005841042 | CDS  |
| hsa-miR-6080     | NM_033306 | CASP4 | 0.00134163  | 3UTR |
| hsa-miR-6081     | NM_033306 | CASP4 | 0.000427688 | CDS  |
| hsa-miR-6081     | NM_033306 | CASP4 | 0.008535009 | CDS  |
| hsa-miR-6081     | NM_033306 | CASP4 | 0.000768445 | CDS  |
| hsa-miR-6084     | NM_033306 | CASP4 | 0.002160358 | 5UTR |
| hsa-miR-6085     | NM_033306 | CASP4 | 0.008380416 | 5UTR |
| hsa-miR-6085     | NM_033306 | CASP4 | 0.005598497 | 3UTR |
| hsa-miR-6086     | NM_033306 | CASP4 | 0.1249703   | 5UTR |
| hsa-miR-6086     | NM_033306 | CASP4 | 0.02698527  | 5UTR |
| hsa-miR-6089     | NM_033306 | CASP4 | 2.70E-05    | CDS  |
| hsa-miR-6090     | NM_033306 | CASP4 | 0.002868814 | CDS  |

|                  |           |       |             |      |
|------------------|-----------|-------|-------------|------|
| hsa-miR-6124     | NM_033306 | CASP4 | 0.002284785 | CDS  |
| hsa-miR-6125     | NM_033306 | CASP4 | 0.000606734 | CDS  |
| hsa-miR-6125     | NM_033306 | CASP4 | 0.008220982 | CDS  |
| hsa-miR-6126     | NM_033306 | CASP4 | 0.000215353 | CDS  |
| hsa-miR-6127     | NM_033306 | CASP4 | 0.006369709 | 3UTR |
| hsa-miR-6129     | NM_033306 | CASP4 | 0.005133538 | CDS  |
| hsa-miR-6129     | NM_033306 | CASP4 | 0.006276804 | 3UTR |
| hsa-miR-6132     | NM_033306 | CASP4 | 0.005953452 | 3UTR |
| hsa-miR-6133     | NM_033306 | CASP4 | 0.000690717 | 3UTR |
| hsa-miR-6134     | NM_033306 | CASP4 | 2.56E-05    | CDS  |
| hsa-miR-6165     | NM_033306 | CASP4 | 0.0071995   | 5UTR |
| hsa-miR-6165     | NM_033306 | CASP4 | 0.1801392   | 5UTR |
| hsa-miR-6499-3p  | NM_033306 | CASP4 | 0.008535009 | CDS  |
| hsa-miR-6499-3p  | NM_033306 | CASP4 | 0.002113119 | 5UTR |
| hsa-miR-6500-5p  | NM_033306 | CASP4 | 0.00011745  | CDS  |
| hsa-miR-6500-5p  | NM_033306 | CASP4 | 0.01804151  | CDS  |
| hsa-miR-6500-3p  | NM_033306 | CASP4 | 0.001788715 | CDS  |
| hsa-miR-6501-5p  | NM_033306 | CASP4 | 0.000271082 | 5UTR |
| hsa-miR-6501-5p  | NM_033306 | CASP4 | 0.001173278 | 5UTR |
| hsa-miR-6501-3p  | NM_033306 | CASP4 | 1.00E-05    | CDS  |
| hsa-miR-6503-5p  | NM_033306 | CASP4 | 0.000314076 | CDS  |
| hsa-miR-6503-3p  | NM_033306 | CASP4 | 0.000248963 | CDS  |
| hsa-miR-6505-5p  | NM_033306 | CASP4 | 0.000271082 | 5UTR |
| hsa-miR-6506-3p  | NM_033306 | CASP4 | 0.000789679 | 5UTR |
| hsa-miR-6507-5p  | NM_033306 | CASP4 | 0.04098359  | 3UTR |
| hsa-miR-6509-5p  | NM_033306 | CASP4 | 4.36E-05    | CDS  |
| hsa-miR-6510-5p  | NM_033306 | CASP4 | 0.1087187   | 5UTR |
| hsa-miR-6510-5p  | NM_033306 | CASP4 | 0.002009155 | 5UTR |
| hsa-miR-6510-5p  | NM_033306 | CASP4 | 0.001680409 | CDS  |
| hsa-miR-6512-3p  | NM_033306 | CASP4 | 0.002870221 | CDS  |
| hsa-miR-6513-5p  | NM_033306 | CASP4 | 0.001503379 | 5UTR |
| hsa-miR-6514-5p  | NM_033306 | CASP4 | 0.001464062 | CDS  |
| hsa-miR-6514-3p  | NM_033306 | CASP4 | 0.000268314 | CDS  |
| hsa-miR-6515-5p  | NM_033306 | CASP4 | 0.005060872 | 3UTR |
| hsa-miR-6716-3p  | NM_033306 | CASP4 | 0.000203446 | CDS  |
| hsa-miR-6717-5p  | NM_033306 | CASP4 | 0.01076079  | CDS  |
| hsa-miR-6511b-5p | NM_033306 | CASP4 | 1.81E-05    | CDS  |
| hsa-miR-6718-5p  | NM_033306 | CASP4 | 0.002095427 | CDS  |
| hsa-miR-6719-3p  | NM_033306 | CASP4 | 0.02104202  | CDS  |
| hsa-miR-6720-3p  | NM_033306 | CASP4 | 4.82E-05    | CDS  |
| hsa-miR-6721-5p  | NM_033306 | CASP4 | 0.006819084 | CDS  |
| hsa-miR-6722-3p  | NM_033306 | CASP4 | 0.001586598 | CDS  |
| hsa-miR-6722-3p  | NM_033306 | CASP4 | 9.29E-05    | CDS  |
| hsa-miR-6726-5p  | NM_033306 | CASP4 | 0.000353171 | CDS  |

|                 |           |       |             |      |
|-----------------|-----------|-------|-------------|------|
| hsa-miR-6727-5p | NM_033306 | CASP4 | 0.000604446 | CDS  |
| hsa-miR-6727-5p | NM_033306 | CASP4 | 0.1524418   | CDS  |
| hsa-miR-6728-5p | NM_033306 | CASP4 | 5.52E-05    | CDS  |
| hsa-miR-6728-3p | NM_033306 | CASP4 | 0.01501671  | CDS  |
| hsa-miR-6729-5p | NM_033306 | CASP4 | 0.006276804 | 3UTR |
| hsa-miR-6730-5p | NM_033306 | CASP4 | 0.1599246   | 5UTR |
| hsa-miR-6730-5p | NM_033306 | CASP4 | 0.006369709 | 3UTR |
| hsa-miR-6731-5p | NM_033306 | CASP4 | 0.005953452 | 3UTR |
| hsa-miR-6731-5p | NM_033306 | CASP4 | 0.005133538 | CDS  |
| hsa-miR-6731-5p | NM_033306 | CASP4 | 0.000556588 | CDS  |
| hsa-miR-6732-5p | NM_033306 | CASP4 | 0.006276804 | CDS  |
| hsa-miR-6733-5p | NM_033306 | CASP4 | 0.0843973   | 5UTR |
| hsa-miR-6734-5p | NM_033306 | CASP4 | 0.012822    | CDS  |
| hsa-miR-6734-5p | NM_033306 | CASP4 | 0.01180922  | CDS  |
| hsa-miR-6734-5p | NM_033306 | CASP4 | 0.001357433 | CDS  |
| hsa-miR-6735-5p | NM_033306 | CASP4 | 0.003534416 | CDS  |
| hsa-miR-6735-3p | NM_033306 | CASP4 | 0.000141499 | CDS  |
| hsa-miR-6736-5p | NM_033306 | CASP4 | 0.002861213 | CDS  |
| hsa-miR-6736-3p | NM_033306 | CASP4 | 0.001140635 | CDS  |
| hsa-miR-6736-3p | NM_033306 | CASP4 | 0.01017319  | CDS  |
| hsa-miR-6736-3p | NM_033306 | CASP4 | 0.00013726  | CDS  |
| hsa-miR-6737-5p | NM_033306 | CASP4 | 0.008948377 | CDS  |
| hsa-miR-6737-5p | NM_033306 | CASP4 | 0.000335791 | CDS  |
| hsa-miR-6737-5p | NM_033306 | CASP4 | 2.56E-05    | CDS  |
| hsa-miR-6738-5p | NM_033306 | CASP4 | 0.000592024 | CDS  |
| hsa-miR-6738-3p | NM_033306 | CASP4 | 5.70E-05    | CDS  |
| hsa-miR-6739-3p | NM_033306 | CASP4 | 0.002462912 | CDS  |
| hsa-miR-6740-5p | NM_033306 | CASP4 | 0.004652781 | CDS  |
| hsa-miR-6740-3p | NM_033306 | CASP4 | 0.002844395 | CDS  |
| hsa-miR-6741-5p | NM_033306 | CASP4 | 0.04209539  | CDS  |
| hsa-miR-6741-5p | NM_033306 | CASP4 | 0.000433683 | CDS  |
| hsa-miR-6741-3p | NM_033306 | CASP4 | 0.0001625   | CDS  |
| hsa-miR-6741-3p | NM_033306 | CASP4 | 0.00013726  | CDS  |
| hsa-miR-6742-5p | NM_033306 | CASP4 | 0.2935726   | CDS  |
| hsa-miR-6742-5p | NM_033306 | CASP4 | 0.004694639 | 5UTR |
| hsa-miR-6742-3p | NM_033306 | CASP4 | 0.001735767 | CDS  |
| hsa-miR-6743-5p | NM_033306 | CASP4 | 0.005598497 | 3UTR |
| hsa-miR-6743-5p | NM_033306 | CASP4 | 0.01804151  | CDS  |
| hsa-miR-6743-3p | NM_033306 | CASP4 | 0.000725653 | CDS  |
| hsa-miR-6744-5p | NM_033306 | CASP4 | 0.000178408 | CDS  |
| hsa-miR-6744-3p | NM_033306 | CASP4 | 0.000141499 | CDS  |
| hsa-miR-6745    | NM_033306 | CASP4 | 0.01128548  | CDS  |
| hsa-miR-6745    | NM_033306 | CASP4 | 0.5825232   | CDS  |
| hsa-miR-6746-5p | NM_033306 | CASP4 | 0.001702817 | CDS  |

|                  |           |       |             |      |
|------------------|-----------|-------|-------------|------|
| hsa-miR-6746-3p  | NM_033306 | CASP4 | 0.007399047 | CDS  |
| hsa-miR-6747-5p  | NM_033306 | CASP4 | 0.01412757  | CDS  |
| hsa-miR-6747-5p  | NM_033306 | CASP4 | 0.1249703   | 5UTR |
| hsa-miR-6748-3p  | NM_033306 | CASP4 | 0.000585775 | CDS  |
| hsa-miR-6748-3p  | NM_033306 | CASP4 | 0.01515751  | CDS  |
| hsa-miR-6749-5p  | NM_033306 | CASP4 | 0.000806233 | CDS  |
| hsa-miR-6750-5p  | NM_033306 | CASP4 | 9.29E-05    | CDS  |
| hsa-miR-6750-5p  | NM_033306 | CASP4 | 2.69E-07    | 5UTR |
| hsa-miR-6750-5p  | NM_033306 | CASP4 | 7.93E-05    | 5UTR |
| hsa-miR-6751-5p  | NM_033306 | CASP4 | 0.002861213 | CDS  |
| hsa-miR-6751-5p  | NM_033306 | CASP4 | 0.000753361 | CDS  |
| hsa-miR-6751-3p  | NM_033306 | CASP4 | 0.007669794 | CDS  |
| hsa-miR-6752-5p  | NM_033306 | CASP4 | 0.000867817 | CDS  |
| hsa-miR-6752-5p  | NM_033306 | CASP4 | 0.005060872 | CDS  |
| hsa-miR-6753-5p  | NM_033306 | CASP4 | 0.002761015 | CDS  |
| hsa-miR-6753-5p  | NM_033306 | CASP4 | 4.84E-05    | CDS  |
| hsa-miR-6753-5p  | NM_033306 | CASP4 | 0.002981617 | CDS  |
| hsa-miR-6753-3p  | NM_033306 | CASP4 | 0.00027619  | CDS  |
| hsa-miR-6754-3p  | NM_033306 | CASP4 | 0.003175839 | CDS  |
| hsa-miR-6756-5p  | NM_033306 | CASP4 | 0.005598497 | CDS  |
| hsa-miR-6756-5p  | NM_033306 | CASP4 | 0.01469811  | CDS  |
| hsa-miR-6756-3p  | NM_033306 | CASP4 | 0.3628757   | 5UTR |
| hsa-miR-6757-5p  | NM_033306 | CASP4 | 0.005598497 | CDS  |
| hsa-miR-6757-5p  | NM_033306 | CASP4 | 0.004667567 | CDS  |
| hsa-miR-6758-5p  | NM_033306 | CASP4 | 0.2188127   | CDS  |
| hsa-miR-6758-5p  | NM_033306 | CASP4 | 0.002558787 | CDS  |
| hsa-miR-6759-5p  | NM_033306 | CASP4 | 0.001586598 | CDS  |
| hsa-miR-6760-5p  | NM_033306 | CASP4 | 0.001680409 | CDS  |
| hsa-miR-6762-3p  | NM_033306 | CASP4 | 0.009503041 | 3UTR |
| hsa-miR-6763-5p  | NM_033306 | CASP4 | 0.006276804 | CDS  |
| hsa-miR-6763-3p  | NM_033306 | CASP4 | 0.003175839 | CDS  |
| hsa-miR-6764-5p  | NM_033306 | CASP4 | 0.00307967  | CDS  |
| hsa-miR-6764-3p  | NM_033306 | CASP4 | 6.59E-07    | CDS  |
| hsa-miR-6765-5p  | NM_033306 | CASP4 | 0.000867817 | CDS  |
| hsa-miR-6765-5p  | NM_033306 | CASP4 | 0.002788661 | CDS  |
| hsa-miR-6765-5p  | NM_033306 | CASP4 | 1.71E-05    | CDS  |
| hsa-miR-6765-3p  | NM_033306 | CASP4 | 0.001140635 | CDS  |
| hsa-miR-6766-5p  | NM_033306 | CASP4 | 0.01348408  | 5UTR |
| hsa-miR-6766-5p  | NM_033306 | CASP4 | 9.29E-05    | CDS  |
| hsa-miR-6766-5p  | NM_033306 | CASP4 | 0.03305347  | CDS  |
| hsa-miR-6767-3p  | NM_033306 | CASP4 | 0.002981617 | CDS  |
| hsa-miR-6768-3p  | NM_033306 | CASP4 | 0.000781748 | CDS  |
| hsa-miR-6769a-5p | NM_033306 | CASP4 | 0.01469811  | CDS  |
| hsa-miR-6769a-5p | NM_033306 | CASP4 | 0.4499833   | CDS  |

|                  |           |       |             |      |
|------------------|-----------|-------|-------------|------|
| hsa-miR-6769a-3p | NM_033306 | CASP4 | 0.007669794 | CDS  |
| hsa-miR-6770-3p  | NM_033306 | CASP4 | 0.000836616 | CDS  |
| hsa-miR-6771-5p  | NM_033306 | CASP4 | 0.000604446 | CDS  |
| hsa-miR-6771-5p  | NM_033306 | CASP4 | 0.005953452 | CDS  |
| hsa-miR-6772-5p  | NM_033306 | CASP4 | 0.000661315 | CDS  |
| hsa-miR-6772-3p  | NM_033306 | CASP4 | 0.000922214 | CDS  |
| hsa-miR-6772-3p  | NM_033306 | CASP4 | 0.002429208 | CDS  |
| hsa-miR-6773-5p  | NM_033306 | CASP4 | 0.000789679 | 5UTR |
| hsa-miR-6773-3p  | NM_033306 | CASP4 | 0.000725653 | CDS  |
| hsa-miR-6774-5p  | NM_033306 | CASP4 | 0.01093692  | CDS  |
| hsa-miR-6774-5p  | NM_033306 | CASP4 | 3.30E-05    | CDS  |
| hsa-miR-6774-3p  | NM_033306 | CASP4 | 0.000515943 | CDS  |
| hsa-miR-6775-5p  | NM_033306 | CASP4 | 0.005598497 | CDS  |
| hsa-miR-6775-5p  | NM_033306 | CASP4 | 0.000844485 | CDS  |
| hsa-miR-6775-3p  | NM_033306 | CASP4 | 0.000781748 | CDS  |
| hsa-miR-6776-5p  | NM_033306 | CASP4 | 0.009055737 | CDS  |
| hsa-miR-6776-5p  | NM_033306 | CASP4 | 2.74E-06    | CDS  |
| hsa-miR-6777-5p  | NM_033306 | CASP4 | 0.002868814 | CDS  |
| hsa-miR-6778-5p  | NM_033306 | CASP4 | 0.003193467 | CDS  |
| hsa-miR-6778-5p  | NM_033306 | CASP4 | 0.000844485 | CDS  |
| hsa-miR-6779-5p  | NM_033306 | CASP4 | 0.005953452 | 3UTR |
| hsa-miR-6780a-5p | NM_033306 | CASP4 | 0.00023617  | CDS  |
| hsa-miR-6780a-5p | NM_033306 | CASP4 | 0.005953452 | 3UTR |
| hsa-miR-6780a-3p | NM_033306 | CASP4 | 0.3628757   | 5UTR |
| hsa-miR-6781-5p  | NM_033306 | CASP4 | 0.001637462 | CDS  |
| hsa-miR-6781-3p  | NM_033306 | CASP4 | 2.02E-05    | CDS  |
| hsa-miR-6781-3p  | NM_033306 | CASP4 | 4.15E-05    | 5UTR |
| hsa-miR-6782-5p  | NM_033306 | CASP4 | 0.004694639 | 5UTR |
| hsa-miR-6782-5p  | NM_033306 | CASP4 | 0.005598497 | CDS  |
| hsa-miR-6782-5p  | NM_033306 | CASP4 | 0.004667567 | CDS  |
| hsa-miR-6782-5p  | NM_033306 | CASP4 | 0.007400426 | 5UTR |
| hsa-miR-6783-5p  | NM_033306 | CASP4 | 7.63E-06    | CDS  |
| hsa-miR-6783-3p  | NM_033306 | CASP4 | 0.003175839 | CDS  |
| hsa-miR-6783-3p  | NM_033306 | CASP4 | 0.001537915 | 5UTR |
| hsa-miR-6784-5p  | NM_033306 | CASP4 | 0.006415714 | 5UTR |
| hsa-miR-6784-5p  | NM_033306 | CASP4 | 5.30E-05    | CDS  |
| hsa-miR-6784-5p  | NM_033306 | CASP4 | 0.002776349 | 5UTR |
| hsa-miR-6785-5p  | NM_033306 | CASP4 | 2.70E-05    | CDS  |
| hsa-miR-6785-5p  | NM_033306 | CASP4 | 0.005953452 | 3UTR |
| hsa-miR-6785-5p  | NM_033306 | CASP4 | 0.1546664   | CDS  |
| hsa-miR-6785-5p  | NM_033306 | CASP4 | 0.004304008 | CDS  |
| hsa-miR-6786-3p  | NM_033306 | CASP4 | 0.000867939 | 5UTR |
| hsa-miR-6787-5p  | NM_033306 | CASP4 | 0.005060872 | 3UTR |
| hsa-miR-6787-3p  | NM_033306 | CASP4 | 0.000293966 | CDS  |

|                 |           |       |             |      |
|-----------------|-----------|-------|-------------|------|
| hsa-miR-6788-5p | NM_033306 | CASP4 | 0.157008    | CDS  |
| hsa-miR-6788-5p | NM_033306 | CASP4 | 0.02723061  | CDS  |
| hsa-miR-6788-3p | NM_033306 | CASP4 | 0.000725653 | CDS  |
| hsa-miR-6789-3p | NM_033306 | CASP4 | 0.01085729  | CDS  |
| hsa-miR-6791-5p | NM_033306 | CASP4 | 0.001166167 | 3UTR |
| hsa-miR-6791-3p | NM_033306 | CASP4 | 0.000372751 | CDS  |
| hsa-miR-6792-5p | NM_033306 | CASP4 | 0.03990186  | CDS  |
| hsa-miR-6792-5p | NM_033306 | CASP4 | 0.1444074   | 5UTR |
| hsa-miR-6793-5p | NM_033306 | CASP4 | 0.06230945  | CDS  |
| hsa-miR-6794-5p | NM_033306 | CASP4 | 9.29E-05    | CDS  |
| hsa-miR-6794-5p | NM_033306 | CASP4 | 0.005953452 | 3UTR |
| hsa-miR-6794-5p | NM_033306 | CASP4 | 0.002868814 | CDS  |
| hsa-miR-6794-3p | NM_033306 | CASP4 | 0.000400512 | CDS  |
| hsa-miR-6795-5p | NM_033306 | CASP4 | 0.01099641  | 5UTR |
| hsa-miR-6795-5p | NM_033306 | CASP4 | 0.001893298 | CDS  |
| hsa-miR-6795-3p | NM_033306 | CASP4 | 0.000525684 | CDS  |
| hsa-miR-6795-3p | NM_033306 | CASP4 | 0.000127802 | CDS  |
| hsa-miR-6796-5p | NM_033306 | CASP4 | 0.003029624 | CDS  |
| hsa-miR-6796-5p | NM_033306 | CASP4 | 0.000346078 | CDS  |
| hsa-miR-6796-5p | NM_033306 | CASP4 | 0.02834176  | 3UTR |
| hsa-miR-6797-5p | NM_033306 | CASP4 | 0.005953452 | 3UTR |
| hsa-miR-6797-5p | NM_033306 | CASP4 | 0.003023611 | 5UTR |
| hsa-miR-6797-3p | NM_033306 | CASP4 | 0.000268314 | CDS  |
| hsa-miR-6798-5p | NM_033306 | CASP4 | 0.005953452 | CDS  |
| hsa-miR-6798-5p | NM_033306 | CASP4 | 0.002981617 | CDS  |
| hsa-miR-6799-5p | NM_033306 | CASP4 | 0.000689104 | 3UTR |
| hsa-miR-6799-5p | NM_033306 | CASP4 | 0.000768445 | CDS  |
| hsa-miR-6799-3p | NM_033306 | CASP4 | 2.02E-05    | CDS  |
| hsa-miR-6800-5p | NM_033306 | CASP4 | 0.02503297  | CDS  |
| hsa-miR-6800-3p | NM_033306 | CASP4 | 6.19E-05    | CDS  |
| hsa-miR-6801-5p | NM_033306 | CASP4 | 0.004176603 | CDS  |
| hsa-miR-6801-5p | NM_033306 | CASP4 | 0.000723216 | CDS  |
| hsa-miR-6802-5p | NM_033306 | CASP4 | 5.52E-05    | CDS  |
| hsa-miR-6802-5p | NM_033306 | CASP4 | 0.03290779  | CDS  |
| hsa-miR-6802-5p | NM_033306 | CASP4 | 0.004048463 | 5UTR |
| hsa-miR-6803-5p | NM_033306 | CASP4 | 0.000690717 | CDS  |
| hsa-miR-6803-5p | NM_033306 | CASP4 | 0.000606734 | CDS  |
| hsa-miR-6804-5p | NM_033306 | CASP4 | 0.02104202  | CDS  |
| hsa-miR-6805-5p | NM_033306 | CASP4 | 0.01469811  | CDS  |
| hsa-miR-6805-5p | NM_033306 | CASP4 | 1.15E-06    | 5UTR |
| hsa-miR-6806-5p | NM_033306 | CASP4 | 0.000618481 | 5UTR |
| hsa-miR-6806-5p | NM_033306 | CASP4 | 0.01274028  | CDS  |
| hsa-miR-6807-5p | NM_033306 | CASP4 | 0.000215353 | CDS  |
| hsa-miR-6807-3p | NM_033306 | CASP4 | 6.27E-05    | CDS  |

|                 |           |       |             |      |
|-----------------|-----------|-------|-------------|------|
| hsa-miR-6807-3p | NM_033306 | CASP4 | 0.004658662 | CDS  |
| hsa-miR-6808-5p | NM_033306 | CASP4 | 0.001680409 | CDS  |
| hsa-miR-6809-3p | NM_033306 | CASP4 | 0.3628757   | 5UTR |
| hsa-miR-6810-5p | NM_033306 | CASP4 | 0.003325874 | 5UTR |
| hsa-miR-6810-5p | NM_033306 | CASP4 | 0.006415714 | 5UTR |
| hsa-miR-6810-3p | NM_033306 | CASP4 | 0.000525684 | CDS  |
| hsa-miR-6811-5p | NM_033306 | CASP4 | 2.20E-05    | CDS  |
| hsa-miR-6811-3p | NM_033306 | CASP4 | 0.007399047 | CDS  |
| hsa-miR-6812-5p | NM_033306 | CASP4 | 0.02577456  | 5UTR |
| hsa-miR-6812-5p | NM_033306 | CASP4 | 0.01506736  | CDS  |
| hsa-miR-6812-3p | NM_033306 | CASP4 | 0.000725653 | CDS  |
| hsa-miR-6812-3p | NM_033306 | CASP4 | 8.39E-06    | CDS  |
| hsa-miR-6813-5p | NM_033306 | CASP4 | 0.005598497 | CDS  |
| hsa-miR-6814-5p | NM_033306 | CASP4 | 0.0173686   | 5UTR |
| hsa-miR-6814-5p | NM_033306 | CASP4 | 0.000172777 | CDS  |
| hsa-miR-6815-5p | NM_033306 | CASP4 | 4.36E-05    | CDS  |
| hsa-miR-6815-3p | NM_033306 | CASP4 | 0.002304037 | CDS  |
| hsa-miR-6816-5p | NM_033306 | CASP4 | 0.008948377 | CDS  |
| hsa-miR-6816-5p | NM_033306 | CASP4 | 0.006276804 | 3UTR |
| hsa-miR-6817-5p | NM_033306 | CASP4 | 0.002043339 | CDS  |
| hsa-miR-6817-3p | NM_033306 | CASP4 | 0.000386263 | CDS  |
| hsa-miR-6818-5p | NM_033306 | CASP4 | 0.01302503  | CDS  |
| hsa-miR-6818-5p | NM_033306 | CASP4 | 0.290863    | CDS  |
| hsa-miR-6818-3p | NM_033306 | CASP4 | 5.86E-05    | CDS  |
| hsa-miR-6819-5p | NM_033306 | CASP4 | 2.56E-05    | CDS  |
| hsa-miR-6819-3p | NM_033306 | CASP4 | 2.10E-07    | 5UTR |
| hsa-miR-6820-5p | NM_033306 | CASP4 | 0.01093692  | CDS  |
| hsa-miR-6820-5p | NM_033306 | CASP4 | 0.000702167 | CDS  |
| hsa-miR-6820-5p | NM_033306 | CASP4 | 0.001301877 | CDS  |
| hsa-miR-6822-3p | NM_033306 | CASP4 | 2.59E-05    | CDS  |
| hsa-miR-6822-3p | NM_033306 | CASP4 | 0.000141499 | CDS  |
| hsa-miR-6823-5p | NM_033306 | CASP4 | 0.006369709 | 3UTR |
| hsa-miR-6823-5p | NM_033306 | CASP4 | 0.1087187   | 5UTR |
| hsa-miR-6823-5p | NM_033306 | CASP4 | 0.001702817 | CDS  |
| hsa-miR-6823-3p | NM_033306 | CASP4 | 0.3503675   | 5UTR |
| hsa-miR-6824-5p | NM_033306 | CASP4 | 0.003549331 | 5UTR |
| hsa-miR-6824-5p | NM_033306 | CASP4 | 0.000215353 | CDS  |
| hsa-miR-6824-5p | NM_033306 | CASP4 | 0.005953452 | 3UTR |
| hsa-miR-6824-3p | NM_033306 | CASP4 | 0.000386263 | CDS  |
| hsa-miR-6825-5p | NM_033306 | CASP4 | 0.02456692  | CDS  |
| hsa-miR-6825-5p | NM_033306 | CASP4 | 0.5825232   | CDS  |
| hsa-miR-6825-5p | NM_033306 | CASP4 | 0.000867817 | CDS  |
| hsa-miR-6825-3p | NM_033306 | CASP4 | 5.70E-05    | CDS  |
| hsa-miR-6825-3p | NM_033306 | CASP4 | 0.02147881  | CDS  |



|                  |           |       |             |      |
|------------------|-----------|-------|-------------|------|
| hsa-miR-6826-5p  | NM_033306 | CASP4 | 0.008560229 | CDS  |
| hsa-miR-6826-3p  | NM_033306 | CASP4 | 0.3503675   | 5UTR |
| hsa-miR-6827-5p  | NM_033306 | CASP4 | 0.004304008 | CDS  |
| hsa-miR-6827-5p  | NM_033306 | CASP4 | 9.55E-05    | CDS  |
| hsa-miR-6827-3p  | NM_033306 | CASP4 | 5.86E-05    | CDS  |
| hsa-miR-6828-5p  | NM_033306 | CASP4 | 0.2188127   | CDS  |
| hsa-miR-6829-5p  | NM_033306 | CASP4 | 0.01298236  | 3UTR |
| hsa-miR-6829-3p  | NM_033306 | CASP4 | 0.004891425 | CDS  |
| hsa-miR-6830-5p  | NM_033306 | CASP4 | 0.001702817 | CDS  |
| hsa-miR-6831-5p  | NM_033306 | CASP4 | 0.000190781 | CDS  |
| hsa-miR-6833-5p  | NM_033306 | CASP4 | 0.0357771   | CDS  |
| hsa-miR-6834-5p  | NM_033306 | CASP4 | 0.005208109 | 3UTR |
| hsa-miR-6834-5p  | NM_033306 | CASP4 | 0.003549331 | 5UTR |
| hsa-miR-6834-5p  | NM_033306 | CASP4 | 0.004418741 | CDS  |
| hsa-miR-6834-3p  | NM_033306 | CASP4 | 0.000155947 | CDS  |
| hsa-miR-6835-5p  | NM_033306 | CASP4 | 0.002558787 | CDS  |
| hsa-miR-6835-5p  | NM_033306 | CASP4 | 0.000867817 | CDS  |
| hsa-miR-6780b-5p | NM_033306 | CASP4 | 0.006276804 | CDS  |
| hsa-miR-6780b-5p | NM_033306 | CASP4 | 0.003325874 | 5UTR |
| hsa-miR-6780b-3p | NM_033306 | CASP4 | 0.000525684 | CDS  |
| hsa-miR-6836-5p  | NM_033306 | CASP4 | 0.000818056 | CDS  |
| hsa-miR-6837-5p  | NM_033306 | CASP4 | 2.14E-05    | CDS  |
| hsa-miR-6837-5p  | NM_033306 | CASP4 | 0.000185897 | 5UTR |
| hsa-miR-6837-3p  | NM_033306 | CASP4 | 0.00307967  | CDS  |
| hsa-miR-6838-3p  | NM_033306 | CASP4 | 0.01629919  | CDS  |
| hsa-miR-6840-5p  | NM_033306 | CASP4 | 0.00307967  | CDS  |
| hsa-miR-6840-3p  | NM_033306 | CASP4 | 4.84E-05    | CDS  |
| hsa-miR-6840-3p  | NM_033306 | CASP4 | 0.000789679 | 5UTR |
| hsa-miR-6841-5p  | NM_033306 | CASP4 | 0.0836195   | 5UTR |
| hsa-miR-6841-3p  | NM_033306 | CASP4 | 0.000631488 | CDS  |
| hsa-miR-6842-5p  | NM_033306 | CASP4 | 8.84E-05    | CDS  |
| hsa-miR-6842-5p  | NM_033306 | CASP4 | 1.15E-06    | 5UTR |
| hsa-miR-6843-3p  | NM_033306 | CASP4 | 7.32E-05    | CDS  |
| hsa-miR-6845-5p  | NM_033306 | CASP4 | 0.00023335  | CDS  |
| hsa-miR-6846-5p  | NM_033306 | CASP4 | 0.1696384   | CDS  |
| hsa-miR-6846-5p  | NM_033306 | CASP4 | 0.001117349 | CDS  |
| hsa-miR-6846-5p  | NM_033306 | CASP4 | 0.000606734 | CDS  |
| hsa-miR-6846-3p  | NM_033306 | CASP4 | 0.0001625   | CDS  |
| hsa-miR-6847-5p  | NM_033306 | CASP4 | 0.000717477 | CDS  |
| hsa-miR-6847-5p  | NM_033306 | CASP4 | 0.002761015 | CDS  |
| hsa-miR-6847-3p  | NM_033306 | CASP4 | 0.007399047 | CDS  |
| hsa-miR-6847-3p  | NM_033306 | CASP4 | 0.000429816 | CDS  |
| hsa-miR-6847-3p  | NM_033306 | CASP4 | 0.0001889   | 5UTR |
| hsa-miR-6848-5p  | NM_033306 | CASP4 | 0.005208109 | CDS  |

|                  |           |       |             |      |
|------------------|-----------|-------|-------------|------|
| hsa-miR-6848-3p  | NM_033306 | CASP4 | 2.59E-05    | CDS  |
| hsa-miR-6848-3p  | NM_033306 | CASP4 | 0.000328221 | CDS  |
| hsa-miR-6849-5p  | NM_033306 | CASP4 | 0.004667567 | CDS  |
| hsa-miR-6849-5p  | NM_033306 | CASP4 | 0.02221825  | CDS  |
| hsa-miR-6849-3p  | NM_033306 | CASP4 | 1.90E-07    | 5UTR |
| hsa-miR-6849-3p  | NM_033306 | CASP4 | 9.29E-05    | CDS  |
| hsa-miR-6850-5p  | NM_033306 | CASP4 | 0.003549331 | 5UTR |
| hsa-miR-6851-5p  | NM_033306 | CASP4 | 2.56E-05    | CDS  |
| hsa-miR-6851-5p  | NM_033306 | CASP4 | 8.84E-05    | CDS  |
| hsa-miR-6851-3p  | NM_033306 | CASP4 | 0.004080075 | CDS  |
| hsa-miR-6852-5p  | NM_033306 | CASP4 | 0.006415714 | 5UTR |
| hsa-miR-6852-5p  | NM_033306 | CASP4 | 0.000489407 | 5UTR |
| hsa-miR-6852-3p  | NM_033306 | CASP4 | 9.47E-05    | CDS  |
| hsa-miR-6855-5p  | NM_033306 | CASP4 | 0.006415714 | 5UTR |
| hsa-miR-6855-5p  | NM_033306 | CASP4 | 0.005598497 | 3UTR |
| hsa-miR-6855-3p  | NM_033306 | CASP4 | 1.38E-05    | CDS  |
| hsa-miR-6856-5p  | NM_033306 | CASP4 | 0.08019548  | CDS  |
| hsa-miR-6856-5p  | NM_033306 | CASP4 | 8.44E-05    | CDS  |
| hsa-miR-6856-5p  | NM_033306 | CASP4 | 0.07629977  | CDS  |
| hsa-miR-6856-3p  | NM_033306 | CASP4 | 0.007399047 | CDS  |
| hsa-miR-6856-3p  | NM_033306 | CASP4 | 0.000400512 | CDS  |
| hsa-miR-6857-5p  | NM_033306 | CASP4 | 0.01093692  | CDS  |
| hsa-miR-6858-5p  | NM_033306 | CASP4 | 0.000215353 | CDS  |
| hsa-miR-6859-5p  | NM_033306 | CASP4 | 0.001114577 | 5UTR |
| hsa-miR-6859-5p  | NM_033306 | CASP4 | 0.1044673   | CDS  |
| hsa-miR-6859-3p  | NM_033306 | CASP4 | 6.22E-06    | CDS  |
| hsa-miR-6769b-5p | NM_033306 | CASP4 | 0.01049294  | CDS  |
| hsa-miR-6860     | NM_033306 | CASP4 | 0.006819084 | CDS  |
| hsa-miR-6860     | NM_033306 | CASP4 | 1.71E-05    | CDS  |
| hsa-miR-6860     | NM_033306 | CASP4 | 0.0177317   | CDS  |
| hsa-miR-6861-5p  | NM_033306 | CASP4 | 0.000193288 | CDS  |
| hsa-miR-6862-5p  | NM_033306 | CASP4 | 0.000353171 | CDS  |
| hsa-miR-6862-5p  | NM_033306 | CASP4 | 0.01412757  | CDS  |
| hsa-miR-6862-3p  | NM_033306 | CASP4 | 0.00307967  | CDS  |
| hsa-miR-6863     | NM_033306 | CASP4 | 0.2935726   | CDS  |
| hsa-miR-6863     | NM_033306 | CASP4 | 0.02698527  | 5UTR |
| hsa-miR-6865-5p  | NM_033306 | CASP4 | 0.000190781 | CDS  |
| hsa-miR-6865-5p  | NM_033306 | CASP4 | 4.36E-05    | CDS  |
| hsa-miR-6865-5p  | NM_033306 | CASP4 | 0.01348408  | 5UTR |
| hsa-miR-6865-3p  | NM_033306 | CASP4 | 2.02E-05    | CDS  |
| hsa-miR-6867-5p  | NM_033306 | CASP4 | 0.01198467  | CDS  |
| hsa-miR-6868-5p  | NM_033306 | CASP4 | 0.02723061  | CDS  |
| hsa-miR-6868-3p  | NM_033306 | CASP4 | 0.178672    | 5UTR |
| hsa-miR-6870-5p  | NM_033306 | CASP4 | 0.000606734 | CDS  |

|                 |           |       |             |      |
|-----------------|-----------|-------|-------------|------|
| hsa-miR-6870-5p | NM_033306 | CASP4 | 0.02834176  | 3UTR |
| hsa-miR-6870-5p | NM_033306 | CASP4 | 0.5825232   | CDS  |
| hsa-miR-6870-3p | NM_033306 | CASP4 | 0.01403179  | CDS  |
| hsa-miR-6871-5p | NM_033306 | CASP4 | 0.004418741 | CDS  |
| hsa-miR-6871-5p | NM_033306 | CASP4 | 0.000790121 | CDS  |
| hsa-miR-6871-5p | NM_033306 | CASP4 | 0.1004401   | CDS  |
| hsa-miR-6871-5p | NM_033306 | CASP4 | 0.007756272 | 5UTR |
| hsa-miR-6871-3p | NM_033306 | CASP4 | 0.00124429  | CDS  |
| hsa-miR-6871-3p | NM_033306 | CASP4 | 4.82E-05    | CDS  |
| hsa-miR-6872-3p | NM_033306 | CASP4 | 0.002982281 | CDS  |
| hsa-miR-6872-3p | NM_033306 | CASP4 | 0.000614096 | CDS  |
| hsa-miR-6873-5p | NM_033306 | CASP4 | 0.002761015 | CDS  |
| hsa-miR-6874-3p | NM_033306 | CASP4 | 0.001560491 | CDS  |
| hsa-miR-6875-5p | NM_033306 | CASP4 | 0.003325874 | 5UTR |
| hsa-miR-6875-3p | NM_033306 | CASP4 | 0.01515751  | CDS  |
| hsa-miR-6876-5p | NM_033306 | CASP4 | 0.001680409 | CDS  |
| hsa-miR-6876-3p | NM_033306 | CASP4 | 0.01713811  | CDS  |
| hsa-miR-6877-5p | NM_033306 | CASP4 | 0.000592024 | CDS  |
| hsa-miR-6877-5p | NM_033306 | CASP4 | 0.000781748 | CDS  |
| hsa-miR-6878-5p | NM_033306 | CASP4 | 0.001637462 | CDS  |
| hsa-miR-6878-3p | NM_033306 | CASP4 | 0.3503675   | 5UTR |
| hsa-miR-6878-3p | NM_033306 | CASP4 | 0.000897137 | CDS  |
| hsa-miR-6879-5p | NM_033306 | CASP4 | 0.1530227   | CDS  |
| hsa-miR-6879-5p | NM_033306 | CASP4 | 0.005598497 | CDS  |
| hsa-miR-6880-3p | NM_033306 | CASP4 | 0.000127802 | CDS  |
| hsa-miR-6881-5p | NM_033306 | CASP4 | 0.00080334  | CDS  |
| hsa-miR-6881-5p | NM_033306 | CASP4 | 0.02834176  | 3UTR |
| hsa-miR-6881-3p | NM_033306 | CASP4 | 0.3628757   | 5UTR |
| hsa-miR-6881-3p | NM_033306 | CASP4 | 0.005658901 | CDS  |
| hsa-miR-6882-3p | NM_033306 | CASP4 | 0.002429208 | CDS  |
| hsa-miR-6883-5p | NM_033306 | CASP4 | 0.006369709 | 3UTR |
| hsa-miR-6884-5p | NM_033306 | CASP4 | 0.1524418   | CDS  |
| hsa-miR-6884-3p | NM_033306 | CASP4 | 0.000631488 | CDS  |
| hsa-miR-6885-5p | NM_033306 | CASP4 | 0.005953452 | CDS  |
| hsa-miR-6886-5p | NM_033306 | CASP4 | 0.0173686   | 5UTR |
| hsa-miR-6887-5p | NM_033306 | CASP4 | 0.000844485 | CDS  |
| hsa-miR-6887-3p | NM_033306 | CASP4 | 0.003929355 | CDS  |
| hsa-miR-6888-5p | NM_033306 | CASP4 | 0.000771646 | 5UTR |
| hsa-miR-6888-3p | NM_033306 | CASP4 | 0.000155947 | CDS  |
| hsa-miR-6889-5p | NM_033306 | CASP4 | 0.001114577 | 5UTR |
| hsa-miR-6889-3p | NM_033306 | CASP4 | 0.00778497  | CDS  |
| hsa-miR-6890-3p | NM_033306 | CASP4 | 0.001140635 | CDS  |
| hsa-miR-6891-5p | NM_033306 | CASP4 | 0.001637462 | CDS  |
| hsa-miR-6891-5p | NM_033306 | CASP4 | 0.000867817 | CDS  |

|                 |           |       |             |      |
|-----------------|-----------|-------|-------------|------|
| hsa-miR-6893-3p | NM_033306 | CASP4 | 0.000525684 | CDS  |
| hsa-miR-6893-3p | NM_033306 | CASP4 | 0.00307967  | CDS  |
| hsa-miR-6894-5p | NM_033306 | CASP4 | 0.000867817 | CDS  |
| hsa-miR-6894-5p | NM_033306 | CASP4 | 0.004488731 | 5UTR |
| hsa-miR-6894-5p | NM_033306 | CASP4 | 0.000353171 | CDS  |
| hsa-miR-6894-3p | NM_033306 | CASP4 | 0.3503675   | 5UTR |
| hsa-miR-6895-5p | NM_033306 | CASP4 | 0.002150872 | CDS  |
| hsa-miR-6895-3p | NM_033306 | CASP4 | 2.43E-07    | 5UTR |
| hsa-miR-7106-5p | NM_033306 | CASP4 | 0.005953452 | 3UTR |
| hsa-miR-7106-5p | NM_033306 | CASP4 | 0.02264435  | CDS  |
| hsa-miR-7106-3p | NM_033306 | CASP4 | 0.01017319  | CDS  |
| hsa-miR-7107-5p | NM_033306 | CASP4 | 0.000592024 | CDS  |
| hsa-miR-7107-5p | NM_033306 | CASP4 | 4.34E-05    | CDS  |
| hsa-miR-7107-3p | NM_033306 | CASP4 | 0.001427036 | CDS  |
| hsa-miR-7108-5p | NM_033306 | CASP4 | 0.000328221 | CDS  |
| hsa-miR-7108-5p | NM_033306 | CASP4 | 3.30E-05    | CDS  |
| hsa-miR-7109-5p | NM_033306 | CASP4 | 0.000172777 | CDS  |
| hsa-miR-7110-5p | NM_033306 | CASP4 | 0.005208109 | CDS  |
| hsa-miR-7110-5p | NM_033306 | CASP4 | 0.3492843   | CDS  |
| hsa-miR-7110-5p | NM_033306 | CASP4 | 0.000651958 | CDS  |
| hsa-miR-7110-3p | NM_033306 | CASP4 | 0.000386263 | CDS  |
| hsa-miR-7111-3p | NM_033306 | CASP4 | 0.3503675   | 5UTR |
| hsa-miR-7112-3p | NM_033306 | CASP4 | 0.004658662 | CDS  |
| hsa-miR-7112-3p | NM_033306 | CASP4 | 4.15E-05    | 5UTR |
| hsa-miR-7112-3p | NM_033306 | CASP4 | 0.002429208 | CDS  |
| hsa-miR-7113-5p | NM_033306 | CASP4 | 0.000489407 | 5UTR |
| hsa-miR-7113-3p | NM_033306 | CASP4 | 0.003175839 | CDS  |
| hsa-miR-7113-3p | NM_033306 | CASP4 | 0.002043339 | CDS  |
| hsa-miR-7114-5p | NM_033306 | CASP4 | 0.0680779   | CDS  |
| hsa-miR-7114-3p | NM_033306 | CASP4 | 6.22E-06    | CDS  |
| hsa-miR-7150    | NM_033306 | CASP4 | 0.002526276 | CDS  |
| hsa-miR-7150    | NM_033306 | CASP4 | 0.05617181  | 5UTR |
| hsa-miR-7150    | NM_033306 | CASP4 | 0.0173686   | 5UTR |
| hsa-miR-7151-3p | NM_033306 | CASP4 | 0.000275599 | 5UTR |
| hsa-miR-7151-3p | NM_033306 | CASP4 | 0.1471589   | 5UTR |
| hsa-miR-7152-3p | NM_033306 | CASP4 | 0.004127298 | CDS  |
| hsa-miR-7154-5p | NM_033306 | CASP4 | 0.000534813 | 3UTR |
| hsa-miR-7154-3p | NM_033306 | CASP4 | 0.000717477 | CDS  |
| hsa-miR-7154-3p | NM_033306 | CASP4 | 0.001893298 | CDS  |
| hsa-miR-7154-3p | NM_033306 | CASP4 | 0.1524418   | CDS  |
| hsa-miR-7156-5p | NM_033306 | CASP4 | 9.07E-06    | CDS  |
| hsa-miR-7156-3p | NM_033306 | CASP4 | 0.000127802 | CDS  |
| hsa-miR-7158-5p | NM_033306 | CASP4 | 0.002728573 | CDS  |
| hsa-miR-7158-5p | NM_033306 | CASP4 | 0.0001889   | 5UTR |

|                  |           |       |             |      |
|------------------|-----------|-------|-------------|------|
| hsa-miR-7158-3p  | NM_033306 | CASP4 | 0.07629977  | CDS  |
| hsa-miR-7158-3p  | NM_033306 | CASP4 | 0.000353786 | CDS  |
| hsa-miR-7161-5p  | NM_033306 | CASP4 | 0.000316826 | CDS  |
| hsa-miR-7161-3p  | NM_033306 | CASP4 | 0.000517607 | CDS  |
| hsa-miR-7161-3p  | NM_033306 | CASP4 | 1.06E-05    | CDS  |
| hsa-miR-7160-5p  | NM_033306 | CASP4 | 0.005133538 | CDS  |
| hsa-miR-7160-5p  | NM_033306 | CASP4 | 0.000343441 | CDS  |
| hsa-miR-7160-3p  | NM_033306 | CASP4 | 0.000633984 | CDS  |
| hsa-miR-7162-5p  | NM_033306 | CASP4 | 0.19092     | 5UTR |
| hsa-miR-7515     | NM_033306 | CASP4 | 0.02336121  | CDS  |
| hsa-miR-7515     | NM_033306 | CASP4 | 0.002284785 | CDS  |
| hsa-miR-7702     | NM_033306 | CASP4 | 0.000709764 | 5UTR |
| hsa-miR-7703     | NM_033306 | CASP4 | 0.01555822  | CDS  |
| hsa-miR-7703     | NM_033306 | CASP4 | 5.70E-05    | CDS  |
| hsa-miR-7704     | NM_033306 | CASP4 | 2.56E-05    | CDS  |
| hsa-miR-7705     | NM_033306 | CASP4 | 0.01403179  | CDS  |
| hsa-miR-7706     | NM_033306 | CASP4 | 0.000473483 | 5UTR |
| hsa-miR-7706     | NM_033306 | CASP4 | 0.004846782 | CDS  |
| hsa-miR-7843-5p  | NM_033306 | CASP4 | 0.02114427  | CDS  |
| hsa-miR-7843-3p  | NM_033306 | CASP4 | 0.000294115 | CDS  |
| hsa-miR-7843-3p  | NM_033306 | CASP4 | 0.004846782 | CDS  |
| hsa-miR-4433b-5p | NM_033306 | CASP4 | 6.22E-06    | CDS  |
| hsa-miR-4433b-3p | NM_033306 | CASP4 | 0.04098359  | 3UTR |
| hsa-miR-4433b-3p | NM_033306 | CASP4 | 0.001680409 | CDS  |
| hsa-miR-1273h-5p | NM_033306 | CASP4 | 0.005953452 | 3UTR |
| hsa-miR-1273h-5p | NM_033306 | CASP4 | 0.01614464  | 5UTR |
| hsa-miR-1273h-3p | NM_033306 | CASP4 | 0.000127802 | CDS  |
| hsa-miR-1273h-3p | NM_033306 | CASP4 | 0.001586598 | CDS  |
| hsa-miR-6516-5p  | NM_033306 | CASP4 | 0.00928296  | 5UTR |
| hsa-miR-7844-5p  | NM_033306 | CASP4 | 4.84E-05    | CDS  |
| hsa-miR-7844-5p  | NM_033306 | CASP4 | 0.003677598 | CDS  |
| hsa-miR-7845-5p  | NM_033306 | CASP4 | 0.001637462 | CDS  |
| hsa-miR-7846-3p  | NM_033306 | CASP4 | 2.70E-05    | CDS  |
| hsa-miR-7846-3p  | NM_033306 | CASP4 | 0.1087187   | 5UTR |
| hsa-miR-7847-3p  | NM_033306 | CASP4 | 0.002761015 | CDS  |
| hsa-miR-7849-3p  | NM_033306 | CASP4 | 0.000572465 | CDS  |
| hsa-miR-7850-5p  | NM_033306 | CASP4 | 5.30E-05    | CDS  |
| hsa-miR-7850-5p  | NM_033306 | CASP4 | 6.59E-07    | CDS  |
| hsa-miR-7851-3p  | NM_033306 | CASP4 | 0.001735767 | CDS  |
| hsa-miR-7854-3p  | NM_033306 | CASP4 | 0.02577456  | 5UTR |
| hsa-miR-7855-5p  | NM_033306 | CASP4 | 0.002990015 | CDS  |
| hsa-miR-7855-5p  | NM_033306 | CASP4 | 0.003855371 | 5UTR |
| hsa-miR-7855-5p  | NM_033306 | CASP4 | 0.002315533 | CDS  |
| hsa-miR-7856-5p  | NM_033306 | CASP4 | 0.000402304 | CDS  |

|                  |           |       |             |      |
|------------------|-----------|-------|-------------|------|
| hsa-miR-7978     | NM_033306 | CASP4 | 0.000873931 | CDS  |
| hsa-miR-8052     | NM_033306 | CASP4 | 0.001637462 | CDS  |
| hsa-miR-8055     | NM_033306 | CASP4 | 0.000592176 | CDS  |
| hsa-miR-8056     | NM_033306 | CASP4 | 0.000131593 | CDS  |
| hsa-miR-8058     | NM_033306 | CASP4 | 0.000973686 | CDS  |
| hsa-miR-8059     | NM_033306 | CASP4 | 0.01800674  | CDS  |
| hsa-miR-8060     | NM_033306 | CASP4 | 0.000592176 | CDS  |
| hsa-miR-8060     | NM_033306 | CASP4 | 0.003747754 | CDS  |
| hsa-miR-8063     | NM_033306 | CASP4 | 0.005953452 | 3UTR |
| hsa-miR-8069     | NM_033306 | CASP4 | 0.005060872 | 3UTR |
| hsa-miR-8069     | NM_033306 | CASP4 | 0.006421811 | CDS  |
| hsa-miR-8072     | NM_033306 | CASP4 | 0.002009155 | 5UTR |
| hsa-miR-8072     | NM_033306 | CASP4 | 0.002526276 | CDS  |
| hsa-miR-8073     | NM_033306 | CASP4 | 0.000271082 | 5UTR |
| hsa-miR-8075     | NM_033306 | CASP4 | 0.007814787 | CDS  |
| hsa-miR-8075     | NM_033306 | CASP4 | 0.000836616 | CDS  |
| hsa-miR-8077     | NM_033306 | CASP4 | 0.000314076 | CDS  |
| hsa-miR-8077     | NM_033306 | CASP4 | 7.30E-05    | CDS  |
| hsa-miR-8077     | NM_033306 | CASP4 | 0.000789679 | 5UTR |
| hsa-miR-8078     | NM_033306 | CASP4 | 0.00293118  | CDS  |
| hsa-miR-8078     | NM_033306 | CASP4 | 0.000887313 | CDS  |
| hsa-miR-8080     | NM_033306 | CASP4 | 0.02336121  | CDS  |
| hsa-miR-8081     | NM_033306 | CASP4 | 8.78E-05    | 5UTR |
| hsa-miR-8082     | NM_033306 | CASP4 | 0.005133538 | CDS  |
| hsa-miR-8085     | NM_033306 | CASP4 | 0.004304008 | CDS  |
| hsa-miR-8085     | NM_033306 | CASP4 | 0.005569582 | CDS  |
| hsa-miR-8088     | NM_033306 | CASP4 | 0.000907814 | CDS  |
| hsa-miR-8089     | NM_033306 | CASP4 | 3.30E-05    | CDS  |
| hsa-miR-8089     | NM_033306 | CASP4 | 0.002861213 | CDS  |
| hsa-miR-9500     | NM_033306 | CASP4 | 0.02336121  | CDS  |
| hsa-miR-9500     | NM_033306 | CASP4 | 0.002284785 | CDS  |
| hsa-miR-9718     | NM_033306 | CASP4 | 0.004480019 | CDS  |
| hsa-miR-9899     | NM_033306 | CASP4 | 0.00124429  | CDS  |
| hsa-miR-9901     | NM_033306 | CASP4 | 0.000723658 | CDS  |
| hsa-miR-1843     | NM_033306 | CASP4 | 1.16E-05    | CDS  |
| hsa-miR-1843     | NM_033306 | CASP4 | 1.60E-07    | 5UTR |
| hsa-miR-9986     | NM_033306 | CASP4 | 0.003549331 | 5UTR |
| hsa-miR-9986     | NM_033306 | CASP4 | 0.002472239 | 5UTR |
| hsa-miR-10226    | NM_033306 | CASP4 | 0.000515943 | CDS  |
| hsa-miR-10392-5p | NM_033306 | CASP4 | 0.000635321 | 3UTR |
| hsa-miR-10393-3p | NM_033306 | CASP4 | 9.92E-06    | 5UTR |
| hsa-miR-10393-3p | NM_033306 | CASP4 | 0.001998536 | CDS  |
| hsa-miR-10394-5p | NM_033306 | CASP4 | 4.61E-06    | CDS  |
| hsa-miR-10394-3p | NM_033306 | CASP4 | 0.000248963 | CDS  |

|                   |           |       |             |      |
|-------------------|-----------|-------|-------------|------|
| hsa-miR-10395-5p  | NM_033306 | CASP4 | 0.000665436 | CDS  |
| hsa-miR-10396a-5p | NM_033306 | CASP4 | 0.001229686 | CDS  |
| hsa-miR-10396a-5p | NM_033306 | CASP4 | 0.006415714 | 5UTR |
| hsa-miR-10396a-3p | NM_033306 | CASP4 | 0.001474321 | CDS  |
| hsa-miR-10397-3p  | NM_033306 | CASP4 | 0.004002583 | CDS  |
| hsa-miR-10398-5p  | NM_033306 | CASP4 | 0.000797533 | CDS  |
| hsa-miR-10398-3p  | NM_033306 | CASP4 | 0.000526877 | CDS  |
| hsa-miR-10399-5p  | NM_033306 | CASP4 | 0.04833768  | CDS  |
| hsa-miR-10399-3p  | NM_033306 | CASP4 | 0.000907136 | CDS  |
| hsa-miR-10399-3p  | NM_033306 | CASP4 | 0.000526877 | CDS  |
| hsa-miR-10400-5p  | NM_033306 | CASP4 | 0.002981617 | CDS  |
| hsa-miR-10400-5p  | NM_033306 | CASP4 | 0.1546664   | CDS  |
| hsa-miR-10400-3p  | NM_033306 | CASP4 | 4.48E-05    | CDS  |
| hsa-miR-10401-5p  | NM_033306 | CASP4 | 0.006073437 | CDS  |
| hsa-miR-10401-5p  | NM_033306 | CASP4 | 0.01049294  | CDS  |
| hsa-miR-10401-5p  | NM_033306 | CASP4 | 0.002761015 | CDS  |
| hsa-miR-10396b-5p | NM_033306 | CASP4 | 0.001229686 | CDS  |
| hsa-miR-10396b-5p | NM_033306 | CASP4 | 0.006538049 | CDS  |
| hsa-miR-10396b-5p | NM_033306 | CASP4 | 0.006415714 | 5UTR |
| hsa-miR-10396b-3p | NM_033306 | CASP4 | 9.12E-06    | CDS  |
| hsa-miR-10396b-3p | NM_033306 | CASP4 | 0.001474321 | CDS  |
| hsa-miR-10523-5p  | NM_033306 | CASP4 | 0.000572465 | CDS  |
| hsa-miR-9983-3p   | NM_033306 | CASP4 | 0.000133449 | 5UTR |
| hsa-miR-10524-5p  | NM_033306 | CASP4 | 4.39E-05    | CDS  |
| hsa-miR-10526-3p  | NM_033306 | CASP4 | 0.006369709 | CDS  |
| hsa-miR-11181-5p  | NM_033306 | CASP4 | 3.30E-05    | CDS  |
| hsa-miR-11181-3p  | NM_033306 | CASP4 | 0.000867817 | CDS  |
| hsa-miR-11399     | NM_033306 | CASP4 | 2.78E-05    | CDS  |
| hsa-miR-11400     | NM_033306 | CASP4 | 0.002728573 | CDS  |
| hsa-miR-11400     | NM_033306 | CASP4 | 0.000205996 | CDS  |
| hsa-miR-11401     | NM_033306 | CASP4 | 6.19E-05    | CDS  |
| hsa-miR-3059-3p   | NM_033306 | CASP4 | 0.002973746 | CDS  |
| hsa-miR-3085-5p   | NM_033306 | CASP4 | 9.55E-05    | CDS  |
| hsa-miR-3085-5p   | NM_033306 | CASP4 | 0.02761587  | CDS  |
| hsa-miR-3085-5p   | NM_033306 | CASP4 | 4.82E-05    | CDS  |
| hsa-miR-3085-5p   | NM_033306 | CASP4 | 0.01469811  | CDS  |
| hsa-miR-3085-3p   | NM_033306 | CASP4 | 2.48E-05    | 5UTR |
| hsa-miR-3085-3p   | NM_033306 | CASP4 | 0.01923861  | 3UTR |
| hsa-miR-6529-3p   | NM_033306 | CASP4 | 0.00778497  | CDS  |
| hsa-miR-9851-5p   | NM_033306 | CASP4 | 0.05617181  | 5UTR |
| hsa-miR-12113     | NM_033306 | CASP4 | 0.003929355 | CDS  |
| hsa-miR-12114     | NM_033306 | CASP4 | 0.000190781 | CDS  |
| hsa-miR-12114     | NM_033306 | CASP4 | 0.000547632 | 3UTR |
| hsa-miR-12115     | NM_033306 | CASP4 | 1.15E-06    | 5UTR |

|                  |              |       |             |      |
|------------------|--------------|-------|-------------|------|
| hsa-miR-12118    | NM_033306    | CASP4 | 0.006369709 | 3UTR |
| hsa-miR-12119    | NM_033306    | CASP4 | 0.00013017  | 5UTR |
| hsa-miR-12120    | NM_033306    | CASP4 | 0.006276804 | 3UTR |
| hsa-miR-12121    | NM_033306    | CASP4 | 0.00307967  | CDS  |
| hsa-miR-12122    | NM_033306    | CASP4 | 0.003331857 | 5UTR |
| hsa-miR-12126    | NM_033306    | CASP4 | 0.000429816 | CDS  |
| hsa-miR-12127    | NM_033306    | CASP4 | 0.001114577 | 5UTR |
| hsa-miR-12127    | NM_033306    | CASP4 | 0.000384642 | CDS  |
| hsa-miR-12128    | NM_033306    | CASP4 | 0.00588506  | CDS  |
| hsa-miR-12129    | NM_033306    | CASP4 | 0.000180943 | 5UTR |
| hsa-miR-12130    | NM_033306    | CASP4 | 0.000205996 | CDS  |
| hsa-miR-12131    | NM_033306    | CASP4 | 0.000218895 | CDS  |
| hsa-let-7a-5p    | XM_011543019 | CASP4 | 0.01506736  | CDS  |
| hsa-let-7a-2-3p  | XM_011543019 | CASP4 | 0.00079746  | 5UTR |
| hsa-let-7b-5p    | XM_011543019 | CASP4 | 0.01506736  | CDS  |
| hsa-let-7b-5p    | XM_011543019 | CASP4 | 0.004304008 | CDS  |
| hsa-let-7c-5p    | XM_011543019 | CASP4 | 0.01506736  | CDS  |
| hsa-let-7c-5p    | XM_011543019 | CASP4 | 0.04654808  | CDS  |
| hsa-let-7d-5p    | XM_011543019 | CASP4 | 0.1524418   | CDS  |
| hsa-let-7e-5p    | XM_011543019 | CASP4 | 0.01506736  | CDS  |
| hsa-let-7e-5p    | XM_011543019 | CASP4 | 0.001057457 | CDS  |
| hsa-let-7f-2-3p  | XM_011543019 | CASP4 | 0.08581254  | CDS  |
| hsa-let-7f-2-3p  | XM_011543019 | CASP4 | 3.51E-05    | 5UTR |
| hsa-miR-15a-5p   | XM_011543019 | CASP4 | 0.006381234 | CDS  |
| hsa-miR-15a-3p   | XM_011543019 | CASP4 | 0.007399047 | CDS  |
| hsa-miR-15a-3p   | XM_011543019 | CASP4 | 0.006225437 | 5UTR |
| hsa-miR-15a-3p   | XM_011543019 | CASP4 | 0.000152911 | 5UTR |
| hsa-miR-16-5p    | XM_011543019 | CASP4 | 0.006381234 | CDS  |
| hsa-miR-18a-5p   | XM_011543019 | CASP4 | 0.000125909 | CDS  |
| hsa-miR-18a-3p   | XM_011543019 | CASP4 | 0.000188063 | CDS  |
| hsa-miR-18a-3p   | XM_011543019 | CASP4 | 9.07E-06    | CDS  |
| hsa-miR-19b-1-5p | XM_011543019 | CASP4 | 0.001427036 | CDS  |
| hsa-miR-19b-1-5p | XM_011543019 | CASP4 | 0.0002477   | CDS  |
| hsa-miR-19b-2-5p | XM_011543019 | CASP4 | 0.0002477   | CDS  |
| hsa-miR-21-3p    | XM_011543019 | CASP4 | 0.000736504 | 5UTR |
| hsa-miR-21-3p    | XM_011543019 | CASP4 | 0.000469015 | 5UTR |
| hsa-miR-22-5p    | XM_011543019 | CASP4 | 0.00059852  | CDS  |
| hsa-miR-23a-5p   | XM_011543019 | CASP4 | 0.000661315 | 3UTR |
| hsa-miR-23a-5p   | XM_011543019 | CASP4 | 3.80E-05    | CDS  |
| hsa-miR-23a-3p   | XM_011543019 | CASP4 | 0.001495267 | 5UTR |
| hsa-miR-23a-3p   | XM_011543019 | CASP4 | 0.008560229 | CDS  |
| hsa-miR-24-3p    | XM_011543019 | CASP4 | 0.000248963 | CDS  |
| hsa-miR-24-3p    | XM_011543019 | CASP4 | 0.000448222 | CDS  |
| hsa-miR-25-5p    | XM_011543019 | CASP4 | 2.70E-05    | CDS  |



|                   |              |       |             |      |
|-------------------|--------------|-------|-------------|------|
| hsa-miR-25-3p     | XM_011543019 | CASP4 | 0.000256036 | CDS  |
| hsa-miR-26a-1-3p  | XM_011543019 | CASP4 | 0.000515943 | CDS  |
| hsa-miR-26b-3p    | XM_011543019 | CASP4 | 0.007606361 | CDS  |
| hsa-miR-27a-3p    | XM_011543019 | CASP4 | 0.01403179  | CDS  |
| hsa-miR-29a-5p    | XM_011543019 | CASP4 | 0.007606361 | CDS  |
| hsa-miR-30a-3p    | XM_011543019 | CASP4 | 0.000226663 | 5UTR |
| hsa-miR-92a-3p    | XM_011543019 | CASP4 | 5.83E-05    | CDS  |
| hsa-miR-92a-3p    | XM_011543019 | CASP4 | 0.000959687 | 5UTR |
| hsa-miR-92a-2-5p  | XM_011543019 | CASP4 | 0.01469811  | CDS  |
| hsa-miR-93-5p     | XM_011543019 | CASP4 | 0.00707833  | CDS  |
| hsa-miR-96-3p     | XM_011543019 | CASP4 | 0.003858073 | CDS  |
| hsa-miR-98-5p     | XM_011543019 | CASP4 | 0.01506736  | CDS  |
| hsa-miR-99a-5p    | XM_011543019 | CASP4 | 0.000188063 | CDS  |
| hsa-miR-99a-3p    | XM_011543019 | CASP4 | 0.000725653 | CDS  |
| hsa-miR-100-5p    | XM_011543019 | CASP4 | 9.14E-06    | 5UTR |
| hsa-miR-29b-1-5p  | XM_011543019 | CASP4 | 0.01082276  | CDS  |
| hsa-miR-29b-1-5p  | XM_011543019 | CASP4 | 0.000811613 | CDS  |
| hsa-miR-103a-2-5p | XM_011543019 | CASP4 | 3.27E-05    | 5UTR |
| hsa-miR-103a-3p   | XM_011543019 | CASP4 | 0.006381234 | CDS  |
| hsa-miR-103a-1-5p | XM_011543019 | CASP4 | 3.27E-05    | 5UTR |
| hsa-miR-107       | XM_011543019 | CASP4 | 0.006381234 | CDS  |
| hsa-miR-192-3p    | XM_011543019 | CASP4 | 0.007719451 | 5UTR |
| hsa-miR-196a-5p   | XM_011543019 | CASP4 | 0.000427688 | CDS  |
| hsa-miR-197-5p    | XM_011543019 | CASP4 | 0.02762239  | CDS  |
| hsa-miR-197-3p    | XM_011543019 | CASP4 | 0.005475725 | CDS  |
| hsa-miR-198       | XM_011543019 | CASP4 | 0.00293118  | CDS  |
| hsa-miR-208a-5p   | XM_011543019 | CASP4 | 5.42E-05    | CDS  |
| hsa-miR-129-5p    | XM_011543019 | CASP4 | 3.17E-07    | CDS  |
| hsa-miR-129-5p    | XM_011543019 | CASP4 | 0.000637219 | 3UTR |
| hsa-miR-30c-2-3p  | XM_011543019 | CASP4 | 0.004304008 | CDS  |
| hsa-miR-30c-2-3p  | XM_011543019 | CASP4 | 0.02723061  | CDS  |
| hsa-miR-30d-5p    | XM_011543019 | CASP4 | 0.1026343   | CDS  |
| hsa-miR-139-5p    | XM_011543019 | CASP4 | 0.000293966 | CDS  |
| hsa-miR-139-5p    | XM_011543019 | CASP4 | 0.01501671  | CDS  |
| hsa-miR-139-5p    | XM_011543019 | CASP4 | 0.02709291  | CDS  |
| hsa-miR-139-5p    | XM_011543019 | CASP4 | 2.55E-06    | CDS  |
| hsa-miR-139-3p    | XM_011543019 | CASP4 | 5.42E-05    | CDS  |
| hsa-miR-139-3p    | XM_011543019 | CASP4 | 0.000218895 | CDS  |
| hsa-miR-147a      | XM_011543019 | CASP4 | 0.00277265  | 5UTR |
| hsa-miR-147a      | XM_011543019 | CASP4 | 0.005709682 | CDS  |
| hsa-miR-10a-5p    | XM_011543019 | CASP4 | 0.001455093 | 5UTR |
| hsa-miR-10b-3p    | XM_011543019 | CASP4 | 0.000137537 | CDS  |
| hsa-miR-34a-5p    | XM_011543019 | CASP4 | 0.000449296 | CDS  |
| hsa-miR-181b-5p   | XM_011543019 | CASP4 | 0.001782072 | CDS  |

|                   |              |       |             |      |
|-------------------|--------------|-------|-------------|------|
| hsa-miR-181c-3p   | XM_011543019 | CASP4 | 0.001474321 | CDS  |
| hsa-miR-182-5p    | XM_011543019 | CASP4 | 0.001229686 | CDS  |
| hsa-miR-187-3p    | XM_011543019 | CASP4 | 0.007719451 | 5UTR |
| hsa-miR-187-3p    | XM_011543019 | CASP4 | 0.06230945  | CDS  |
| hsa-miR-205-5p    | XM_011543019 | CASP4 | 0.01515751  | CDS  |
| hsa-miR-205-5p    | XM_011543019 | CASP4 | 0.003929355 | CDS  |
| hsa-miR-212-3p    | XM_011543019 | CASP4 | 0.000549167 | 5UTR |
| hsa-miR-214-5p    | XM_011543019 | CASP4 | 0.08965697  | 5UTR |
| hsa-miR-215-3p    | XM_011543019 | CASP4 | 4.32E-05    | CDS  |
| hsa-miR-215-3p    | XM_011543019 | CASP4 | 0.01917344  | 5UTR |
| hsa-miR-219a-1-3p | XM_011543019 | CASP4 | 8.78E-05    | 5UTR |
| hsa-miR-221-5p    | XM_011543019 | CASP4 | 0.003441311 | CDS  |
| hsa-miR-224-5p    | XM_011543019 | CASP4 | 6.51E-05    | CDS  |
| hsa-let-7g-5p     | XM_011543019 | CASP4 | 0.01506736  | CDS  |
| hsa-let-7g-3p     | XM_011543019 | CASP4 | 0.00023617  | CDS  |
| hsa-let-7i-5p     | XM_011543019 | CASP4 | 0.07629977  | CDS  |
| hsa-let-7i-5p     | XM_011543019 | CASP4 | 0.04733824  | 5UTR |
| hsa-miR-15b-5p    | XM_011543019 | CASP4 | 0.006381234 | CDS  |
| hsa-miR-23b-5p    | XM_011543019 | CASP4 | 0.001839698 | CDS  |
| hsa-miR-23b-3p    | XM_011543019 | CASP4 | 0.001495267 | 5UTR |
| hsa-miR-23b-3p    | XM_011543019 | CASP4 | 0.008560229 | CDS  |
| hsa-miR-30b-3p    | XM_011543019 | CASP4 | 0.000604446 | CDS  |
| hsa-miR-30b-3p    | XM_011543019 | CASP4 | 0.02723061  | CDS  |
| hsa-miR-124-3p    | XM_011543019 | CASP4 | 0.000437056 | 5UTR |
| hsa-miR-125b-1-3p | XM_011543019 | CASP4 | 0.02761587  | CDS  |
| hsa-miR-125b-1-3p | XM_011543019 | CASP4 | 0.006819084 | 3UTR |
| hsa-miR-125b-1-3p | XM_011543019 | CASP4 | 5.42E-05    | CDS  |
| hsa-miR-128-1-5p  | XM_011543019 | CASP4 | 4.39E-05    | CDS  |
| hsa-miR-132-5p    | XM_011543019 | CASP4 | 0.006994664 | CDS  |
| hsa-miR-133a-3p   | XM_011543019 | CASP4 | 0.002990015 | CDS  |
| hsa-miR-133a-3p   | XM_011543019 | CASP4 | 0.000379668 | CDS  |
| hsa-miR-135a-3p   | XM_011543019 | CASP4 | 0.000383308 | 5UTR |
| hsa-miR-135a-3p   | XM_011543019 | CASP4 | 0.01004367  | CDS  |
| hsa-miR-135a-3p   | XM_011543019 | CASP4 | 0.005598497 | 3UTR |
| hsa-miR-135a-2-3p | XM_011543019 | CASP4 | 1.59E-05    | 5UTR |
| hsa-miR-137-5p    | XM_011543019 | CASP4 | 0.01193851  | 5UTR |
| hsa-miR-138-5p    | XM_011543019 | CASP4 | 0.0218458   | 3UTR |
| hsa-miR-141-5p    | XM_011543019 | CASP4 | 0.00039126  | 5UTR |
| hsa-miR-141-5p    | XM_011543019 | CASP4 | 0.141785    | 5UTR |
| hsa-miR-142-3p    | XM_011543019 | CASP4 | 0.000698596 | CDS  |
| hsa-miR-143-5p    | XM_011543019 | CASP4 | 0.000427688 | CDS  |
| hsa-miR-143-5p    | XM_011543019 | CASP4 | 0.01052851  | CDS  |
| hsa-miR-143-5p    | XM_011543019 | CASP4 | 0.007399047 | CDS  |
| hsa-miR-143-5p    | XM_011543019 | CASP4 | 0.000248963 | CDS  |

|                  |              |       |             |      |
|------------------|--------------|-------|-------------|------|
| hsa-miR-145-5p   | XM_011543019 | CASP4 | 0.000875419 | 5UTR |
| hsa-miR-145-5p   | XM_011543019 | CASP4 | 0.00131835  | CDS  |
| hsa-miR-152-3p   | XM_011543019 | CASP4 | 8.25E-06    | CDS  |
| hsa-miR-153-5p   | XM_011543019 | CASP4 | 0.002279852 | CDS  |
| hsa-miR-191-3p   | XM_011543019 | CASP4 | 8.39E-06    | CDS  |
| hsa-miR-125a-5p  | XM_011543019 | CASP4 | 0.000525684 | CDS  |
| hsa-miR-127-5p   | XM_011543019 | CASP4 | 0.003396159 | CDS  |
| hsa-miR-134-3p   | XM_011543019 | CASP4 | 0.01433785  | 5UTR |
| hsa-miR-138-1-3p | XM_011543019 | CASP4 | 0.001122082 | 5UTR |
| hsa-miR-138-1-3p | XM_011543019 | CASP4 | 0.000725653 | CDS  |
| hsa-miR-146a-3p  | XM_011543019 | CASP4 | 5.70E-05    | CDS  |
| hsa-miR-146a-3p  | XM_011543019 | CASP4 | 0.001455093 | 5UTR |
| hsa-miR-149-5p   | XM_011543019 | CASP4 | 0.007606361 | CDS  |
| hsa-miR-149-5p   | XM_011543019 | CASP4 | 0.000616808 | CDS  |
| hsa-miR-149-3p   | XM_011543019 | CASP4 | 0.006369709 | CDS  |
| hsa-miR-150-3p   | XM_011543019 | CASP4 | 1.81E-05    | CDS  |
| hsa-miR-150-3p   | XM_011543019 | CASP4 | 0.002488129 | 5UTR |
| hsa-miR-154-5p   | XM_011543019 | CASP4 | 0.008463178 | 5UTR |
| hsa-miR-154-5p   | XM_011543019 | CASP4 | 0.007276623 | 5UTR |
| hsa-miR-185-5p   | XM_011543019 | CASP4 | 1.16E-05    | CDS  |
| hsa-miR-185-3p   | XM_011543019 | CASP4 | 0.000142782 | CDS  |
| hsa-miR-185-3p   | XM_011543019 | CASP4 | 8.66E-05    | CDS  |
| hsa-miR-188-5p   | XM_011543019 | CASP4 | 0.001788715 | CDS  |
| hsa-miR-188-3p   | XM_011543019 | CASP4 | 0.01501671  | CDS  |
| hsa-miR-188-3p   | XM_011543019 | CASP4 | 0.00307967  | CDS  |
| hsa-miR-193a-5p  | XM_011543019 | CASP4 | 4.32E-05    | CDS  |
| hsa-miR-193a-5p  | XM_011543019 | CASP4 | 0.000470238 | CDS  |
| hsa-miR-193a-3p  | XM_011543019 | CASP4 | 1.38E-05    | CDS  |
| hsa-miR-194-5p   | XM_011543019 | CASP4 | 0.001301877 | CDS  |
| hsa-miR-194-5p   | XM_011543019 | CASP4 | 0.000549167 | 5UTR |
| hsa-miR-195-5p   | XM_011543019 | CASP4 | 0.006381234 | CDS  |
| hsa-miR-206      | XM_011543019 | CASP4 | 0.01445031  | CDS  |
| hsa-miR-320a-5p  | XM_011543019 | CASP4 | 0.000725653 | CDS  |
| hsa-miR-320a-3p  | XM_011543019 | CASP4 | 0.0218458   | CDS  |
| hsa-miR-200c-5p  | XM_011543019 | CASP4 | 5.86E-05    | CDS  |
| hsa-miR-106b-3p  | XM_011543019 | CASP4 | 0.00307967  | CDS  |
| hsa-miR-106b-3p  | XM_011543019 | CASP4 | 0.01849425  | CDS  |
| hsa-miR-30c-1-3p | XM_011543019 | CASP4 | 0.004304008 | CDS  |
| hsa-miR-30c-1-3p | XM_011543019 | CASP4 | 0.005953452 | 3UTR |
| hsa-miR-302a-3p  | XM_011543019 | CASP4 | 0.000229505 | 5UTR |
| hsa-miR-301a-5p  | XM_011543019 | CASP4 | 0.02147881  | CDS  |
| hsa-miR-99b-3p   | XM_011543019 | CASP4 | 0.01017319  | CDS  |
| hsa-miR-296-3p   | XM_011543019 | CASP4 | 0.005208109 | CDS  |
| hsa-miR-296-3p   | XM_011543019 | CASP4 | 0.002868814 | CDS  |

|                 |              |       |             |      |
|-----------------|--------------|-------|-------------|------|
| hsa-miR-130b-5p | XM_011543019 | CASP4 | 0.000605186 | CDS  |
| hsa-miR-361-5p  | XM_011543019 | CASP4 | 0.000742402 | 5UTR |
| hsa-miR-361-5p  | XM_011543019 | CASP4 | 0.000137537 | CDS  |
| hsa-miR-361-3p  | XM_011543019 | CASP4 | 1.97E-05    | CDS  |
| hsa-miR-365a-5p | XM_011543019 | CASP4 | 0.001560807 | CDS  |
| hsa-miR-365a-5p | XM_011543019 | CASP4 | 0.000526877 | CDS  |
| hsa-miR-365a-5p | XM_011543019 | CASP4 | 8.66E-05    | CDS  |
| hsa-miR-365b-5p | XM_011543019 | CASP4 | 0.000781748 | CDS  |
| hsa-miR-365b-5p | XM_011543019 | CASP4 | 0.000193288 | CDS  |
| hsa-miR-302c-3p | XM_011543019 | CASP4 | 0.000142782 | CDS  |
| hsa-miR-302c-3p | XM_011543019 | CASP4 | 0.000229505 | 5UTR |
| hsa-miR-302d-3p | XM_011543019 | CASP4 | 0.000229505 | 5UTR |
| hsa-miR-376c-5p | XM_011543019 | CASP4 | 0.260039    | 5UTR |
| hsa-miR-370-3p  | XM_011543019 | CASP4 | 0.000616808 | 5UTR |
| hsa-miR-372-5p  | XM_011543019 | CASP4 | 9.44E-06    | CDS  |
| hsa-miR-376a-5p | XM_011543019 | CASP4 | 0.00011745  | CDS  |
| hsa-miR-376a-5p | XM_011543019 | CASP4 | 0.000428783 | CDS  |
| hsa-miR-377-5p  | XM_011543019 | CASP4 | 8.44E-05    | CDS  |
| hsa-miR-378a-5p | XM_011543019 | CASP4 | 0.000957196 | 5UTR |
| hsa-miR-378a-5p | XM_011543019 | CASP4 | 2.26E-06    | CDS  |
| hsa-miR-378a-3p | XM_011543019 | CASP4 | 0.02723061  | CDS  |
| hsa-miR-378a-3p | XM_011543019 | CASP4 | 0.01583934  | 5UTR |
| hsa-miR-381-5p  | XM_011543019 | CASP4 | 0.000618857 | CDS  |
| hsa-miR-382-5p  | XM_011543019 | CASP4 | 0.005791904 | CDS  |
| hsa-miR-330-3p  | XM_011543019 | CASP4 | 0.000248963 | CDS  |
| hsa-miR-328-5p  | XM_011543019 | CASP4 | 0.000867817 | CDS  |
| hsa-miR-328-5p  | XM_011543019 | CASP4 | 0.000379457 | 5UTR |
| hsa-miR-328-3p  | XM_011543019 | CASP4 | 0.004080075 | CDS  |
| hsa-miR-328-3p  | XM_011543019 | CASP4 | 1.38E-05    | CDS  |
| hsa-miR-328-3p  | XM_011543019 | CASP4 | 0.0001625   | CDS  |
| hsa-miR-323a-5p | XM_011543019 | CASP4 | 8.94E-05    | 5UTR |
| hsa-miR-151a-5p | XM_011543019 | CASP4 | 0.000172777 | CDS  |
| hsa-miR-151a-3p | XM_011543019 | CASP4 | 0.001474321 | CDS  |
| hsa-miR-151a-3p | XM_011543019 | CASP4 | 0.00134163  | 3UTR |
| hsa-miR-135b-5p | XM_011543019 | CASP4 | 0.000797533 | CDS  |
| hsa-miR-148b-5p | XM_011543019 | CASP4 | 0.01637427  | 5UTR |
| hsa-miR-331-5p  | XM_011543019 | CASP4 | 5.52E-05    | CDS  |
| hsa-miR-331-3p  | XM_011543019 | CASP4 | 0.001412567 | 5UTR |
| hsa-miR-324-5p  | XM_011543019 | CASP4 | 0.000131593 | CDS  |
| hsa-miR-324-3p  | XM_011543019 | CASP4 | 2.27E-05    | CDS  |
| hsa-miR-324-3p  | XM_011543019 | CASP4 | 9.07E-06    | CDS  |
| hsa-miR-338-3p  | XM_011543019 | CASP4 | 0.000928292 | 5UTR |
| hsa-miR-339-5p  | XM_011543019 | CASP4 | 7.76E-07    | CDS  |
| hsa-miR-339-3p  | XM_011543019 | CASP4 | 4.82E-05    | CDS  |

|                 |              |       |             |      |
|-----------------|--------------|-------|-------------|------|
| hsa-miR-133b    | XM_011543019 | CASP4 | 0.002990015 | CDS  |
| hsa-miR-133b    | XM_011543019 | CASP4 | 0.000379668 | CDS  |
| hsa-miR-325     | XM_011543019 | CASP4 | 0.000449296 | CDS  |
| hsa-miR-345-5p  | XM_011543019 | CASP4 | 0.01082276  | CDS  |
| hsa-miR-345-3p  | XM_011543019 | CASP4 | 0.000725653 | CDS  |
| hsa-miR-346     | XM_011543019 | CASP4 | 0.000386263 | CDS  |
| hsa-miR-196b-5p | XM_011543019 | CASP4 | 0.000427688 | CDS  |
| hsa-miR-422a    | XM_011543019 | CASP4 | 0.01583934  | 5UTR |
| hsa-miR-422a    | XM_011543019 | CASP4 | 0.00023335  | CDS  |
| hsa-miR-423-5p  | XM_011543019 | CASP4 | 0.001482999 | CDS  |
| hsa-miR-423-3p  | XM_011543019 | CASP4 | 0.000309971 | CDS  |
| hsa-miR-425-3p  | XM_011543019 | CASP4 | 0.04080268  | CDS  |
| hsa-miR-20b-5p  | XM_011543019 | CASP4 | 0.000125909 | CDS  |
| hsa-miR-20b-3p  | XM_011543019 | CASP4 | 0.000221888 | CDS  |
| hsa-miR-431-5p  | XM_011543019 | CASP4 | 3.17E-07    | CDS  |
| hsa-miR-431-5p  | XM_011543019 | CASP4 | 0.008839129 | CDS  |
| hsa-miR-431-3p  | XM_011543019 | CASP4 | 0.001560807 | CDS  |
| hsa-miR-329-5p  | XM_011543019 | CASP4 | 0.00080334  | CDS  |
| hsa-miR-410-5p  | XM_011543019 | CASP4 | 0.2188127   | CDS  |
| hsa-miR-376b-5p | XM_011543019 | CASP4 | 0.0103363   | CDS  |
| hsa-miR-376b-5p | XM_011543019 | CASP4 | 0.000131593 | CDS  |
| hsa-miR-485-5p  | XM_011543019 | CASP4 | 0.000482834 | 5UTR |
| hsa-miR-485-5p  | XM_011543019 | CASP4 | 0.001117349 | CDS  |
| hsa-miR-485-3p  | XM_011543019 | CASP4 | 6.51E-05    | CDS  |
| hsa-miR-486-5p  | XM_011543019 | CASP4 | 0.001899482 | 5UTR |
| hsa-miR-486-5p  | XM_011543019 | CASP4 | 0.000975553 | CDS  |
| hsa-miR-486-3p  | XM_011543019 | CASP4 | 1.41E-05    | CDS  |
| hsa-miR-487a-5p | XM_011543019 | CASP4 | 0.000320483 | 5UTR |
| hsa-miR-487a-5p | XM_011543019 | CASP4 | 0.000530791 | CDS  |
| hsa-miR-488-3p  | XM_011543019 | CASP4 | 0.000218895 | CDS  |
| hsa-miR-490-5p  | XM_011543019 | CASP4 | 0.000294115 | CDS  |
| hsa-miR-491-5p  | XM_011543019 | CASP4 | 0.002442208 | 5UTR |
| hsa-miR-491-5p  | XM_011543019 | CASP4 | 0.005156117 | CDS  |
| hsa-miR-491-3p  | XM_011543019 | CASP4 | 0.002295539 | CDS  |
| hsa-miR-511-5p  | XM_011543019 | CASP4 | 0.007719451 | 5UTR |
| hsa-miR-146b-5p | XM_011543019 | CASP4 | 8.25E-06    | CDS  |
| hsa-miR-146b-3p | XM_011543019 | CASP4 | 8.39E-06    | CDS  |
| hsa-miR-146b-3p | XM_011543019 | CASP4 | 0.000578367 | CDS  |
| hsa-miR-146b-3p | XM_011543019 | CASP4 | 0.001412567 | 5UTR |
| hsa-miR-202-3p  | XM_011543019 | CASP4 | 0.006369709 | 3UTR |
| hsa-miR-202-3p  | XM_011543019 | CASP4 | 0.001723097 | CDS  |
| hsa-miR-492     | XM_011543019 | CASP4 | 0.001560807 | CDS  |
| hsa-miR-493-3p  | XM_011543019 | CASP4 | 0.01009722  | CDS  |
| hsa-miR-432-5p  | XM_011543019 | CASP4 | 0.001166167 | 3UTR |

|                 |              |       |             |      |
|-----------------|--------------|-------|-------------|------|
| hsa-miR-432-3p  | XM_011543019 | CASP4 | 0.000836616 | CDS  |
| hsa-miR-432-3p  | XM_011543019 | CASP4 | 0.001918944 | CDS  |
| hsa-miR-494-5p  | XM_011543019 | CASP4 | 0.07938423  | CDS  |
| hsa-miR-494-5p  | XM_011543019 | CASP4 | 0.000579714 | CDS  |
| hsa-miR-494-5p  | XM_011543019 | CASP4 | 0.08954206  | 5UTR |
| hsa-miR-494-5p  | XM_011543019 | CASP4 | 0.01076079  | CDS  |
| hsa-miR-193b-5p | XM_011543019 | CASP4 | 0.000606734 | CDS  |
| hsa-miR-193b-3p | XM_011543019 | CASP4 | 1.38E-05    | CDS  |
| hsa-miR-193b-3p | XM_011543019 | CASP4 | 0.00124429  | CDS  |
| hsa-miR-497-5p  | XM_011543019 | CASP4 | 0.006381234 | CDS  |
| hsa-miR-497-3p  | XM_011543019 | CASP4 | 0.00124429  | CDS  |
| hsa-miR-181d-3p | XM_011543019 | CASP4 | 0.001577185 | 5UTR |
| hsa-miR-512-3p  | XM_011543019 | CASP4 | 0.000125909 | CDS  |
| hsa-miR-512-3p  | XM_011543019 | CASP4 | 0.002095427 | CDS  |
| hsa-miR-498-5p  | XM_011543019 | CASP4 | 0.009704041 | CDS  |
| hsa-miR-498-3p  | XM_011543019 | CASP4 | 4.82E-05    | CDS  |
| hsa-miR-515-5p  | XM_011543019 | CASP4 | 0.000259514 | CDS  |
| hsa-miR-515-3p  | XM_011543019 | CASP4 | 0.000125909 | CDS  |
| hsa-miR-519e-5p | XM_011543019 | CASP4 | 0.004938008 | 5UTR |
| hsa-miR-519e-5p | XM_011543019 | CASP4 | 0.009149916 | CDS  |
| hsa-miR-520f-3p | XM_011543019 | CASP4 | 5.86E-05    | CDS  |
| hsa-miR-526b-3p | XM_011543019 | CASP4 | 9.96E-05    | CDS  |
| hsa-miR-525-5p  | XM_011543019 | CASP4 | 0.00307967  | CDS  |
| hsa-miR-525-3p  | XM_011543019 | CASP4 | 0.000131593 | CDS  |
| hsa-miR-518f-3p | XM_011543019 | CASP4 | 0.002304037 | 5UTR |
| hsa-miR-526a-3p | XM_011543019 | CASP4 | 0.01661348  | CDS  |
| hsa-miR-520c-3p | XM_011543019 | CASP4 | 5.86E-05    | CDS  |
| hsa-miR-518c-3p | XM_011543019 | CASP4 | 0.002304037 | 5UTR |
| hsa-miR-518c-3p | XM_011543019 | CASP4 | 0.01661348  | CDS  |
| hsa-miR-524-3p  | XM_011543019 | CASP4 | 0.006804399 | CDS  |
| hsa-miR-517-5p  | XM_011543019 | CASP4 | 9.44E-06    | CDS  |
| hsa-miR-517a-3p | XM_011543019 | CASP4 | 0.003858073 | CDS  |
| hsa-miR-519d-5p | XM_011543019 | CASP4 | 0.002489073 | 5UTR |
| hsa-miR-519d-5p | XM_011543019 | CASP4 | 0.00307967  | CDS  |
| hsa-miR-521     | XM_011543019 | CASP4 | 0.000131593 | CDS  |
| hsa-miR-520d-3p | XM_011543019 | CASP4 | 0.000581447 | CDS  |
| hsa-miR-520d-3p | XM_011543019 | CASP4 | 5.86E-05    | CDS  |
| hsa-miR-520d-3p | XM_011543019 | CASP4 | 0.000171579 | CDS  |
| hsa-miR-520d-3p | XM_011543019 | CASP4 | 0.005791904 | CDS  |
| hsa-miR-517b-3p | XM_011543019 | CASP4 | 0.003858073 | CDS  |
| hsa-miR-520g-3p | XM_011543019 | CASP4 | 0.00707833  | CDS  |
| hsa-miR-516b-3p | XM_011543019 | CASP4 | 0.000110421 | CDS  |
| hsa-miR-518e-3p | XM_011543019 | CASP4 | 0.000131593 | CDS  |
| hsa-miR-518a-5p | XM_011543019 | CASP4 | 0.002489073 | 5UTR |

|                   |              |       |             |      |
|-------------------|--------------|-------|-------------|------|
| hsa-miR-517c-3p   | XM_011543019 | CASP4 | 0.003858073 | CDS  |
| hsa-miR-522-3p    | XM_011543019 | CASP4 | 4.20E-05    | CDS  |
| hsa-miR-527       | XM_011543019 | CASP4 | 0.002489073 | 5UTR |
| hsa-miR-516a-3p   | XM_011543019 | CASP4 | 0.000110421 | CDS  |
| hsa-miR-500a-3p   | XM_011543019 | CASP4 | 4.32E-05    | CDS  |
| hsa-miR-501-5p    | XM_011543019 | CASP4 | 0.01515751  | CDS  |
| hsa-miR-501-5p    | XM_011543019 | CASP4 | 0.000585775 | CDS  |
| hsa-miR-502-3p    | XM_011543019 | CASP4 | 4.32E-05    | CDS  |
| hsa-miR-503-5p    | XM_011543019 | CASP4 | 0.006381234 | CDS  |
| hsa-miR-503-5p    | XM_011543019 | CASP4 | 0.000152911 | 5UTR |
| hsa-miR-503-3p    | XM_011543019 | CASP4 | 0.000322366 | 5UTR |
| hsa-miR-504-5p    | XM_011543019 | CASP4 | 0.002877047 | CDS  |
| hsa-miR-504-3p    | XM_011543019 | CASP4 | 0.005953452 | 3UTR |
| hsa-miR-504-3p    | XM_011543019 | CASP4 | 0.001723097 | CDS  |
| hsa-miR-504-3p    | XM_011543019 | CASP4 | 0.001396956 | 5UTR |
| hsa-miR-505-5p    | XM_011543019 | CASP4 | 0.002868814 | CDS  |
| hsa-miR-505-5p    | XM_011543019 | CASP4 | 1.71E-05    | CDS  |
| hsa-miR-505-5p    | XM_011543019 | CASP4 | 0.002698706 | CDS  |
| hsa-miR-508-5p    | XM_011543019 | CASP4 | 0.01778475  | CDS  |
| hsa-miR-508-5p    | XM_011543019 | CASP4 | 0.000605186 | CDS  |
| hsa-miR-508-3p    | XM_011543019 | CASP4 | 0.00558577  | CDS  |
| hsa-miR-509-3p    | XM_011543019 | CASP4 | 4.82E-05    | CDS  |
| hsa-miR-509-3p    | XM_011543019 | CASP4 | 0.01864605  | CDS  |
| hsa-miR-514a-3p   | XM_011543019 | CASP4 | 5.83E-05    | CDS  |
| hsa-miR-532-3p    | XM_011543019 | CASP4 | 0.002973746 | CDS  |
| hsa-miR-455-5p    | XM_011543019 | CASP4 | 0.009638896 | 5UTR |
| hsa-miR-455-5p    | XM_011543019 | CASP4 | 0.0171237   | CDS  |
| hsa-miR-455-3p    | XM_011543019 | CASP4 | 2.70E-05    | CDS  |
| hsa-miR-376a-2-5p | XM_011543019 | CASP4 | 0.000428783 | 5UTR |
| hsa-miR-487b-5p   | XM_011543019 | CASP4 | 0.000659914 | CDS  |
| hsa-miR-551a      | XM_011543019 | CASP4 | 9.12E-06    | CDS  |
| hsa-miR-552-3p    | XM_011543019 | CASP4 | 0.000190781 | CDS  |
| hsa-miR-554       | XM_011543019 | CASP4 | 0.000975553 | CDS  |
| hsa-miR-554       | XM_011543019 | CASP4 | 7.30E-05    | CDS  |
| hsa-miR-92b-5p    | XM_011543019 | CASP4 | 0.00023335  | CDS  |
| hsa-miR-92b-3p    | XM_011543019 | CASP4 | 0.000811613 | CDS  |
| hsa-miR-556-5p    | XM_011543019 | CASP4 | 0.08247515  | CDS  |
| hsa-miR-557       | XM_011543019 | CASP4 | 7.53E-05    | CDS  |
| hsa-miR-558       | XM_011543019 | CASP4 | 0.000240069 | CDS  |
| hsa-miR-567       | XM_011543019 | CASP4 | 2.27E-06    | CDS  |
| hsa-miR-551b-3p   | XM_011543019 | CASP4 | 0.01082276  | CDS  |
| hsa-miR-572       | XM_011543019 | CASP4 | 8.39E-06    | CDS  |
| hsa-miR-572       | XM_011543019 | CASP4 | 0.01637427  | 5UTR |
| hsa-miR-574-5p    | XM_011543019 | CASP4 | 0.01307337  | CDS  |

|                 |              |       |             |      |
|-----------------|--------------|-------|-------------|------|
| hsa-miR-576-5p  | XM_011543019 | CASP4 | 0.007087661 | CDS  |
| hsa-miR-578     | XM_011543019 | CASP4 | 0.000179002 | CDS  |
| hsa-miR-579-5p  | XM_011543019 | CASP4 | 0.002981617 | CDS  |
| hsa-miR-584-5p  | XM_011543019 | CASP4 | 0.000568399 | CDS  |
| hsa-miR-584-3p  | XM_011543019 | CASP4 | 0.00013726  | CDS  |
| hsa-miR-585-3p  | XM_011543019 | CASP4 | 0.01864605  | CDS  |
| hsa-miR-548b-5p | XM_011543019 | CASP4 | 0.03571082  | 5UTR |
| hsa-miR-589-3p  | XM_011543019 | CASP4 | 0.01204711  | CDS  |
| hsa-miR-589-3p  | XM_011543019 | CASP4 | 0.1092693   | 5UTR |
| hsa-miR-550a-5p | XM_011543019 | CASP4 | 0.000433683 | CDS  |
| hsa-miR-550a-5p | XM_011543019 | CASP4 | 0.000207738 | 5UTR |
| hsa-miR-550a-3p | XM_011543019 | CASP4 | 0.00275918  | CDS  |
| hsa-miR-593-5p  | XM_011543019 | CASP4 | 0.000427548 | 5UTR |
| hsa-miR-593-5p  | XM_011543019 | CASP4 | 4.82E-05    | CDS  |
| hsa-miR-593-5p  | XM_011543019 | CASP4 | 0.002517568 | CDS  |
| hsa-miR-593-3p  | XM_011543019 | CASP4 | 0.007719451 | 5UTR |
| hsa-miR-593-3p  | XM_011543019 | CASP4 | 0.00526056  | 5UTR |
| hsa-miR-595     | XM_011543019 | CASP4 | 0.004667567 | CDS  |
| hsa-miR-597-3p  | XM_011543019 | CASP4 | 0.001348557 | CDS  |
| hsa-miR-598-5p  | XM_011543019 | CASP4 | 9.92E-06    | 5UTR |
| hsa-miR-601     | XM_011543019 | CASP4 | 2.93E-05    | CDS  |
| hsa-miR-601     | XM_011543019 | CASP4 | 0.000234425 | CDS  |
| hsa-miR-602     | XM_011543019 | CASP4 | 6.27E-05    | CDS  |
| hsa-miR-604     | XM_011543019 | CASP4 | 0.001117584 | 5UTR |
| hsa-miR-608     | XM_011543019 | CASP4 | 0.004446168 | CDS  |
| hsa-miR-608     | XM_011543019 | CASP4 | 0.01350715  | 5UTR |
| hsa-miR-608     | XM_011543019 | CASP4 | 0.005598497 | 3UTR |
| hsa-miR-609     | XM_011543019 | CASP4 | 0.001332125 | CDS  |
| hsa-miR-609     | XM_011543019 | CASP4 | 0.000353171 | CDS  |
| hsa-miR-610     | XM_011543019 | CASP4 | 0.00215005  | CDS  |
| hsa-miR-610     | XM_011543019 | CASP4 | 0.007669794 | CDS  |
| hsa-miR-611     | XM_011543019 | CASP4 | 0.000275604 | CDS  |
| hsa-miR-612     | XM_011543019 | CASP4 | 0.0218458   | 3UTR |
| hsa-miR-612     | XM_011543019 | CASP4 | 0.000152911 | 5UTR |
| hsa-miR-612     | XM_011543019 | CASP4 | 0.000230217 | CDS  |
| hsa-miR-612     | XM_011543019 | CASP4 | 0.01089887  | CDS  |
| hsa-miR-613     | XM_011543019 | CASP4 | 0.005593335 | CDS  |
| hsa-miR-616-3p  | XM_011543019 | CASP4 | 0.008172057 | CDS  |
| hsa-miR-616-3p  | XM_011543019 | CASP4 | 0.000725653 | CDS  |
| hsa-miR-616-3p  | XM_011543019 | CASP4 | 0.005060872 | 3UTR |
| hsa-miR-548c-5p | XM_011543019 | CASP4 | 0.03571082  | 5UTR |
| hsa-miR-617     | XM_011543019 | CASP4 | 0.000193288 | CDS  |
| hsa-miR-619-3p  | XM_011543019 | CASP4 | 0.000155497 | 5UTR |
| hsa-miR-619-3p  | XM_011543019 | CASP4 | 4.84E-05    | CDS  |



|                 |              |       |             |      |
|-----------------|--------------|-------|-------------|------|
| hsa-miR-621     | XM_011543019 | CASP4 | 0.000427688 | CDS  |
| hsa-miR-622     | XM_011543019 | CASP4 | 2.48E-05    | 5UTR |
| hsa-miR-622     | XM_011543019 | CASP4 | 0.00059852  | CDS  |
| hsa-miR-623     | XM_011543019 | CASP4 | 1.97E-05    | CDS  |
| hsa-miR-624-5p  | XM_011543019 | CASP4 | 0.002990015 | CDS  |
| hsa-miR-631     | XM_011543019 | CASP4 | 1.38E-05    | CDS  |
| hsa-miR-631     | XM_011543019 | CASP4 | 0.003441311 | CDS  |
| hsa-miR-33b-3p  | XM_011543019 | CASP4 | 4.82E-05    | CDS  |
| hsa-miR-33b-3p  | XM_011543019 | CASP4 | 0.002228703 | CDS  |
| hsa-miR-632     | XM_011543019 | CASP4 | 0.002462912 | CDS  |
| hsa-miR-632     | XM_011543019 | CASP4 | 0.06288141  | 5UTR |
| hsa-miR-637     | XM_011543019 | CASP4 | 0.000604446 | CDS  |
| hsa-miR-637     | XM_011543019 | CASP4 | 0.005208109 | 3UTR |
| hsa-miR-638     | XM_011543019 | CASP4 | 0.006369709 | CDS  |
| hsa-miR-639     | XM_011543019 | CASP4 | 0.003175839 | CDS  |
| hsa-miR-639     | XM_011543019 | CASP4 | 0.0218458   | 3UTR |
| hsa-miR-642a-5p | XM_011543019 | CASP4 | 0.002462912 | CDS  |
| hsa-miR-644a    | XM_011543019 | CASP4 | 0.01049294  | CDS  |
| hsa-miR-644a    | XM_011543019 | CASP4 | 0.007697962 | CDS  |
| hsa-miR-646     | XM_011543019 | CASP4 | 0.006285921 | 5UTR |
| hsa-miR-648     | XM_011543019 | CASP4 | 0.009704041 | CDS  |
| hsa-miR-650     | XM_011543019 | CASP4 | 2.56E-05    | CDS  |
| hsa-miR-652-5p  | XM_011543019 | CASP4 | 5.83E-05    | CDS  |
| hsa-miR-548d-5p | XM_011543019 | CASP4 | 0.03571082  | 5UTR |
| hsa-miR-661     | XM_011543019 | CASP4 | 0.002429208 | CDS  |
| hsa-miR-661     | XM_011543019 | CASP4 | 9.07E-06    | CDS  |
| hsa-miR-662     | XM_011543019 | CASP4 | 0.00307967  | CDS  |
| hsa-miR-663a    | XM_011543019 | CASP4 | 7.32E-05    | CDS  |
| hsa-miR-663a    | XM_011543019 | CASP4 | 0.002517568 | CDS  |
| hsa-miR-657     | XM_011543019 | CASP4 | 0.000579714 | CDS  |
| hsa-miR-659-3p  | XM_011543019 | CASP4 | 0.000616808 | CDS  |
| hsa-miR-659-3p  | XM_011543019 | CASP4 | 0.01889378  | 3UTR |
| hsa-miR-659-3p  | XM_011543019 | CASP4 | 0.000155666 | CDS  |
| hsa-miR-758-3p  | XM_011543019 | CASP4 | 0.0199223   | 5UTR |
| hsa-miR-671-5p  | XM_011543019 | CASP4 | 0.001351419 | CDS  |
| hsa-miR-671-5p  | XM_011543019 | CASP4 | 0.000983833 | 5UTR |
| hsa-miR-671-3p  | XM_011543019 | CASP4 | 0.002870221 | CDS  |
| hsa-miR-671-3p  | XM_011543019 | CASP4 | 0.01114662  | CDS  |
| hsa-miR-668-5p  | XM_011543019 | CASP4 | 0.000229505 | 5UTR |
| hsa-miR-668-5p  | XM_011543019 | CASP4 | 4.32E-05    | CDS  |
| hsa-miR-767-5p  | XM_011543019 | CASP4 | 0.001656376 | 5UTR |
| hsa-miR-767-3p  | XM_011543019 | CASP4 | 3.30E-05    | CDS  |
| hsa-miR-1224-5p | XM_011543019 | CASP4 | 0.002526276 | CDS  |
| hsa-miR-320b    | XM_011543019 | CASP4 | 0.0218458   | CDS  |

|                 |              |       |             |      |
|-----------------|--------------|-------|-------------|------|
| hsa-miR-320c    | XM_011543019 | CASP4 | 0.0218458   | 3UTR |
| hsa-miR-320c    | XM_011543019 | CASP4 | 0.2093077   | 3UTR |
| hsa-miR-1296-5p | XM_011543019 | CASP4 | 0.01597706  | CDS  |
| hsa-miR-1296-5p | XM_011543019 | CASP4 | 0.000141499 | CDS  |
| hsa-miR-1296-5p | XM_011543019 | CASP4 | 0.000142782 | CDS  |
| hsa-miR-1323    | XM_011543019 | CASP4 | 0.03691652  | CDS  |
| hsa-miR-1271-3p | XM_011543019 | CASP4 | 0.000142782 | CDS  |
| hsa-miR-1301-5p | XM_011543019 | CASP4 | 1.47E-05    | CDS  |
| hsa-miR-449c-5p | XM_011543019 | CASP4 | 0.00104551  | CDS  |
| hsa-miR-769-5p  | XM_011543019 | CASP4 | 0.002973746 | CDS  |
| hsa-miR-769-5p  | XM_011543019 | CASP4 | 0.02607847  | CDS  |
| hsa-miR-769-3p  | XM_011543019 | CASP4 | 0.01091542  | CDS  |
| hsa-miR-766-5p  | XM_011543019 | CASP4 | 8.44E-05    | CDS  |
| hsa-miR-766-5p  | XM_011543019 | CASP4 | 0.005953452 | 3UTR |
| hsa-miR-766-3p  | XM_011543019 | CASP4 | 5.70E-05    | CDS  |
| hsa-miR-766-3p  | XM_011543019 | CASP4 | 0.000927185 | 5UTR |
| hsa-miR-378d    | XM_011543019 | CASP4 | 0.01583934  | 5UTR |
| hsa-miR-762     | XM_011543019 | CASP4 | 0.005598497 | 3UTR |
| hsa-miR-2113    | XM_011543019 | CASP4 | 0.000148032 | CDS  |
| hsa-miR-764     | XM_011543019 | CASP4 | 0.000818056 | CDS  |
| hsa-miR-764     | XM_011543019 | CASP4 | 9.37E-05    | CDS  |
| hsa-miR-764     | XM_011543019 | CASP4 | 0.000961128 | CDS  |
| hsa-miR-765     | XM_011543019 | CASP4 | 0.002811797 | CDS  |
| hsa-miR-675-5p  | XM_011543019 | CASP4 | 0.000369195 | CDS  |
| hsa-miR-675-3p  | XM_011543019 | CASP4 | 1.75E-05    | CDS  |
| hsa-miR-298     | XM_011543019 | CASP4 | 0.000536431 | CDS  |
| hsa-miR-300     | XM_011543019 | CASP4 | 9.11E-05    | CDS  |
| hsa-miR-874-3p  | XM_011543019 | CASP4 | 1.28E-05    | 5UTR |
| hsa-miR-890     | XM_011543019 | CASP4 | 0.01655688  | 5UTR |
| hsa-miR-892b    | XM_011543019 | CASP4 | 0.000317383 | CDS  |
| hsa-miR-892b    | XM_011543019 | CASP4 | 0.007606361 | CDS  |
| hsa-miR-541-3p  | XM_011543019 | CASP4 | 1.41E-05    | CDS  |
| hsa-miR-541-3p  | XM_011543019 | CASP4 | 0.008659816 | CDS  |
| hsa-miR-147b-3p | XM_011543019 | CASP4 | 0.005709682 | CDS  |
| hsa-miR-744-5p  | XM_011543019 | CASP4 | 0.005598497 | 3UTR |
| hsa-miR-744-5p  | XM_011543019 | CASP4 | 2.20E-05    | CDS  |
| hsa-miR-885-3p  | XM_011543019 | CASP4 | 0.001117584 | 5UTR |
| hsa-miR-885-3p  | XM_011543019 | CASP4 | 0.002868814 | CDS  |
| hsa-miR-877-5p  | XM_011543019 | CASP4 | 0.001321211 | 5UTR |
| hsa-miR-877-3p  | XM_011543019 | CASP4 | 0.3628757   | 5UTR |
| hsa-miR-887-3p  | XM_011543019 | CASP4 | 0.000215353 | CDS  |
| hsa-miR-665     | XM_011543019 | CASP4 | 0.000282051 | CDS  |
| hsa-miR-665     | XM_011543019 | CASP4 | 2.14E-05    | CDS  |
| hsa-miR-873-3p  | XM_011543019 | CASP4 | 7.63E-06    | CDS  |

|                 |              |       |             |      |
|-----------------|--------------|-------|-------------|------|
| hsa-miR-873-3p  | XM_011543019 | CASP4 | 0.001160472 | CDS  |
| hsa-miR-374b-3p | XM_011543019 | CASP4 | 0.2003249   | 3UTR |
| hsa-miR-760     | XM_011543019 | CASP4 | 0.001371415 | CDS  |
| hsa-miR-760     | XM_011543019 | CASP4 | 0.000309971 | CDS  |
| hsa-miR-301b-5p | XM_011543019 | CASP4 | 5.70E-05    | CDS  |
| hsa-miR-216b-5p | XM_011543019 | CASP4 | 1.13E-06    | CDS  |
| hsa-miR-920     | XM_011543019 | CASP4 | 0.001396956 | 5UTR |
| hsa-miR-920     | XM_011543019 | CASP4 | 7.63E-06    | CDS  |
| hsa-miR-920     | XM_011543019 | CASP4 | 0.002811797 | CDS  |
| hsa-miR-921     | XM_011543019 | CASP4 | 0.002314096 | 5UTR |
| hsa-miR-924     | XM_011543019 | CASP4 | 0.01085729  | CDS  |
| hsa-miR-933     | XM_011543019 | CASP4 | 0.000266327 | CDS  |
| hsa-miR-933     | XM_011543019 | CASP4 | 0.001142641 | 5UTR |
| hsa-miR-937-5p  | XM_011543019 | CASP4 | 0.006276804 | 3UTR |
| hsa-miR-937-5p  | XM_011543019 | CASP4 | 0.002868814 | CDS  |
| hsa-miR-938     | XM_011543019 | CASP4 | 0.00136803  | 5UTR |
| hsa-miR-939-5p  | XM_011543019 | CASP4 | 0.01093692  | CDS  |
| hsa-miR-939-3p  | XM_011543019 | CASP4 | 0.002982281 | CDS  |
| hsa-miR-941     | XM_011543019 | CASP4 | 0.003677598 | CDS  |
| hsa-miR-943     | XM_011543019 | CASP4 | 0.000811613 | CDS  |
| hsa-miR-1178-5p | XM_011543019 | CASP4 | 0.000203446 | CDS  |
| hsa-miR-1180-3p | XM_011543019 | CASP4 | 0.003929355 | CDS  |
| hsa-miR-1180-3p | XM_011543019 | CASP4 | 8.53E-07    | CDS  |
| hsa-miR-1180-3p | XM_011543019 | CASP4 | 0.000958633 | CDS  |
| hsa-miR-1181    | XM_011543019 | CASP4 | 2.20E-05    | 5UTR |
| hsa-miR-1182    | XM_011543019 | CASP4 | 0.000689104 | 3UTR |
| hsa-miR-1182    | XM_011543019 | CASP4 | 0.000651958 | CDS  |
| hsa-miR-1183    | XM_011543019 | CASP4 | 0.07567372  | CDS  |
| hsa-miR-1183    | XM_011543019 | CASP4 | 1.81E-05    | CDS  |
| hsa-miR-1184    | XM_011543019 | CASP4 | 0.01923861  | 3UTR |
| hsa-miR-1184    | XM_011543019 | CASP4 | 1.81E-05    | CDS  |
| hsa-miR-1225-5p | XM_011543019 | CASP4 | 0.01274028  | CDS  |
| hsa-miR-1225-5p | XM_011543019 | CASP4 | 2.73E-05    | 5UTR |
| hsa-miR-1225-3p | XM_011543019 | CASP4 | 0.007669794 | CDS  |
| hsa-miR-1226-5p | XM_011543019 | CASP4 | 7.53E-05    | CDS  |
| hsa-miR-1226-3p | XM_011543019 | CASP4 | 0.000736504 | 5UTR |
| hsa-miR-1227-5p | XM_011543019 | CASP4 | 0.004418741 | CDS  |
| hsa-miR-1228-5p | XM_011543019 | CASP4 | 0.000867817 | CDS  |
| hsa-miR-1228-3p | XM_011543019 | CASP4 | 0.001338793 | 5UTR |
| hsa-miR-1229-5p | XM_011543019 | CASP4 | 0.001723097 | CDS  |
| hsa-miR-1229-5p | XM_011543019 | CASP4 | 0.00277265  | 5UTR |
| hsa-miR-1229-3p | XM_011543019 | CASP4 | 0.000907136 | CDS  |
| hsa-miR-1231    | XM_011543019 | CASP4 | 0.000207738 | 5UTR |
| hsa-miR-1233-5p | XM_011543019 | CASP4 | 0.2935726   | CDS  |

|                 |              |       |             |      |
|-----------------|--------------|-------|-------------|------|
| hsa-miR-1233-3p | XM_011543019 | CASP4 | 3.27E-05    | 5UTR |
| hsa-miR-1236-3p | XM_011543019 | CASP4 | 0.000293966 | CDS  |
| hsa-miR-1237-5p | XM_011543019 | CASP4 | 2.56E-05    | CDS  |
| hsa-miR-1237-5p | XM_011543019 | CASP4 | 0.000427688 | CDS  |
| hsa-miR-1237-3p | XM_011543019 | CASP4 | 8.36E-06    | CDS  |
| hsa-miR-1237-3p | XM_011543019 | CASP4 | 0.000323006 | CDS  |
| hsa-miR-1238-5p | XM_011543019 | CASP4 | 0.006073437 | CDS  |
| hsa-miR-1202    | XM_011543019 | CASP4 | 0.007719451 | 5UTR |
| hsa-miR-1203    | XM_011543019 | CASP4 | 0.000127802 | CDS  |
| hsa-miR-1203    | XM_011543019 | CASP4 | 0.002150872 | CDS  |
| hsa-miR-663b    | XM_011543019 | CASP4 | 0.000322366 | CDS  |
| hsa-miR-1204    | XM_011543019 | CASP4 | 0.000320483 | 5UTR |
| hsa-miR-1205    | XM_011543019 | CASP4 | 0.000752854 | 5UTR |
| hsa-miR-1205    | XM_011543019 | CASP4 | 0.003175839 | CDS  |
| hsa-miR-1207-5p | XM_011543019 | CASP4 | 0.000155666 | CDS  |
| hsa-miR-1207-5p | XM_011543019 | CASP4 | 0.1546664   | CDS  |
| hsa-miR-1207-5p | XM_011543019 | CASP4 | 0.006538049 | CDS  |
| hsa-miR-1285-5p | XM_011543019 | CASP4 | 0.001652899 | 5UTR |
| hsa-miR-1285-3p | XM_011543019 | CASP4 | 3.30E-05    | CDS  |
| hsa-miR-1286    | XM_011543019 | CASP4 | 1.82E-05    | CDS  |
| hsa-miR-1287-5p | XM_011543019 | CASP4 | 0.000975553 | 5UTR |
| hsa-miR-1287-3p | XM_011543019 | CASP4 | 0.001371415 | CDS  |
| hsa-miR-1289    | XM_011543019 | CASP4 | 0.04253148  | CDS  |
| hsa-miR-1289    | XM_011543019 | CASP4 | 0.002150872 | CDS  |
| hsa-miR-1291    | XM_011543019 | CASP4 | 0.009314406 | CDS  |
| hsa-miR-1293    | XM_011543019 | CASP4 | 4.36E-05    | CDS  |
| hsa-miR-1295a   | XM_011543019 | CASP4 | 0.005352298 | CDS  |
| hsa-miR-1295a   | XM_011543019 | CASP4 | 0.000781748 | CDS  |
| hsa-miR-1299    | XM_011543019 | CASP4 | 0.006933323 | CDS  |
| hsa-miR-1299    | XM_011543019 | CASP4 | 0.1344473   | CDS  |
| hsa-miR-1303    | XM_011543019 | CASP4 | 0.03057205  | CDS  |
| hsa-miR-1304-3p | XM_011543019 | CASP4 | 0.000706898 | CDS  |
| hsa-miR-1244    | XM_011543019 | CASP4 | 0.153048    | CDS  |
| hsa-miR-1247-5p | XM_011543019 | CASP4 | 0.000188063 | CDS  |
| hsa-miR-1247-3p | XM_011543019 | CASP4 | 5.83E-05    | CDS  |
| hsa-miR-1249-5p | XM_011543019 | CASP4 | 0.002284785 | CDS  |
| hsa-miR-1250-5p | XM_011543019 | CASP4 | 0.000369195 | CDS  |
| hsa-miR-1250-5p | XM_011543019 | CASP4 | 2.78E-05    | CDS  |
| hsa-miR-1250-5p | XM_011543019 | CASP4 | 0.01412757  | 3UTR |
| hsa-miR-1251-3p | XM_011543019 | CASP4 | 0.003273847 | 5UTR |
| hsa-miR-1261    | XM_011543019 | CASP4 | 0.01179483  | CDS  |
| hsa-miR-1261    | XM_011543019 | CASP4 | 0.000576363 | CDS  |
| hsa-miR-1265    | XM_011543019 | CASP4 | 4.39E-05    | CDS  |
| hsa-miR-1266-5p | XM_011543019 | CASP4 | 0.000907814 | CDS  |

|                  |              |       |             |      |
|------------------|--------------|-------|-------------|------|
| hsa-miR-1268a    | XM_011543019 | CASP4 | 0.005546619 | CDS  |
| hsa-miR-1268a    | XM_011543019 | CASP4 | 0.02350072  | CDS  |
| hsa-miR-1270     | XM_011543019 | CASP4 | 0.157008    | CDS  |
| hsa-miR-1270     | XM_011543019 | CASP4 | 0.000671792 | CDS  |
| hsa-miR-1275     | XM_011543019 | CASP4 | 1.59E-05    | 5UTR |
| hsa-miR-1275     | XM_011543019 | CASP4 | 0.005208109 | 3UTR |
| hsa-miR-1276     | XM_011543019 | CASP4 | 0.01085729  | CDS  |
| hsa-miR-302f     | XM_011543019 | CASP4 | 0.000229505 | 5UTR |
| hsa-miR-1284     | XM_011543019 | CASP4 | 0.000585775 | CDS  |
| hsa-miR-1288-3p  | XM_011543019 | CASP4 | 0.000709764 | 5UTR |
| hsa-miR-1255b-5p | XM_011543019 | CASP4 | 0.000864707 | 5UTR |
| hsa-miR-1306-3p  | XM_011543019 | CASP4 | 0.000811613 | CDS  |
| hsa-miR-1307-5p  | XM_011543019 | CASP4 | 0.001474321 | CDS  |
| hsa-miR-1307-3p  | XM_011543019 | CASP4 | 0.003209116 | 5UTR |
| hsa-miR-1307-3p  | XM_011543019 | CASP4 | 2.26E-06    | CDS  |
| hsa-miR-1307-3p  | XM_011543019 | CASP4 | 0.01227059  | CDS  |
| hsa-miR-1322     | XM_011543019 | CASP4 | 0.001955862 | 5UTR |
| hsa-miR-1469     | XM_011543019 | CASP4 | 0.006819084 | 3UTR |
| hsa-miR-1471     | XM_011543019 | CASP4 | 0.02503297  | CDS  |
| hsa-miR-1538     | XM_011543019 | CASP4 | 0.006538049 | 3UTR |
| hsa-miR-1538     | XM_011543019 | CASP4 | 0.007399047 | CDS  |
| hsa-miR-1539     | XM_011543019 | CASP4 | 0.002295539 | CDS  |
| hsa-miR-1825     | XM_011543019 | CASP4 | 0.002870221 | CDS  |
| hsa-miR-1827     | XM_011543019 | CASP4 | 0.01506736  | CDS  |
| hsa-miR-1908-3p  | XM_011543019 | CASP4 | 2.83E-05    | CDS  |
| hsa-miR-1908-3p  | XM_011543019 | CASP4 | 0.001474321 | CDS  |
| hsa-miR-1909-3p  | XM_011543019 | CASP4 | 0.02503297  | CDS  |
| hsa-miR-1909-3p  | XM_011543019 | CASP4 | 0.000256036 | CDS  |
| hsa-miR-1909-3p  | XM_011543019 | CASP4 | 0.000131593 | CDS  |
| hsa-miR-1910-3p  | XM_011543019 | CASP4 | 0.1524418   | CDS  |
| hsa-miR-1911-5p  | XM_011543019 | CASP4 | 0.01128548  | CDS  |
| hsa-miR-1911-3p  | XM_011543019 | CASP4 | 0.003677598 | CDS  |
| hsa-miR-1912-5p  | XM_011543019 | CASP4 | 0.003209116 | 5UTR |
| hsa-miR-1913     | XM_011543019 | CASP4 | 0.000155947 | CDS  |
| hsa-miR-1914-3p  | XM_011543019 | CASP4 | 0.000768445 | CDS  |
| hsa-miR-1914-3p  | XM_011543019 | CASP4 | 0.001249294 | 5UTR |
| hsa-miR-1915-5p  | XM_011543019 | CASP4 | 0.002066391 | 5UTR |
| hsa-miR-1915-5p  | XM_011543019 | CASP4 | 0.002250044 | 5UTR |
| hsa-miR-1972     | XM_011543019 | CASP4 | 0.001474321 | CDS  |
| hsa-miR-1972     | XM_011543019 | CASP4 | 0.000587308 | 5UTR |
| hsa-miR-1972     | XM_011543019 | CASP4 | 0.002517568 | CDS  |
| hsa-miR-1972     | XM_011543019 | CASP4 | 2.78E-05    | CDS  |
| hsa-miR-1976     | XM_011543019 | CASP4 | 9.07E-06    | CDS  |
| hsa-miR-1976     | XM_011543019 | CASP4 | 0.001899482 | 5UTR |

|                  |              |       |             |      |
|------------------|--------------|-------|-------------|------|
| hsa-miR-2110     | XM_011543019 | CASP4 | 1.92E-05    | 5UTR |
| hsa-miR-2114-3p  | XM_011543019 | CASP4 | 0.002400999 | 5UTR |
| hsa-miR-2115-5p  | XM_011543019 | CASP4 | 0.000381243 | 5UTR |
| hsa-miR-2116-5p  | XM_011543019 | CASP4 | 0.00720588  | CDS  |
| hsa-miR-2116-5p  | XM_011543019 | CASP4 | 0.002304037 | 5UTR |
| hsa-miR-2116-3p  | XM_011543019 | CASP4 | 5.83E-05    | CDS  |
| hsa-miR-2117     | XM_011543019 | CASP4 | 3.16E-05    | CDS  |
| hsa-miR-548q     | XM_011543019 | CASP4 | 0.0218458   | 3UTR |
| hsa-miR-2276-5p  | XM_011543019 | CASP4 | 5.76E-05    | 5UTR |
| hsa-miR-2277-5p  | XM_011543019 | CASP4 | 0.006819084 | 3UTR |
| hsa-miR-2277-3p  | XM_011543019 | CASP4 | 2.83E-05    | CDS  |
| hsa-miR-2277-3p  | XM_011543019 | CASP4 | 4.82E-05    | CDS  |
| hsa-miR-2278     | XM_011543019 | CASP4 | 0.002868814 | CDS  |
| hsa-miR-2681-5p  | XM_011543019 | CASP4 | 0.002731967 | 5UTR |
| hsa-miR-2681-5p  | XM_011543019 | CASP4 | 0.00011745  | CDS  |
| hsa-miR-2682-3p  | XM_011543019 | CASP4 | 8.39E-06    | CDS  |
| hsa-miR-711      | XM_011543019 | CASP4 | 0.003143502 | 5UTR |
| hsa-miR-718      | XM_011543019 | CASP4 | 0.000323006 | CDS  |
| hsa-miR-2861     | XM_011543019 | CASP4 | 0.002150872 | CDS  |
| hsa-miR-2861     | XM_011543019 | CASP4 | 3.43E-05    | CDS  |
| hsa-miR-2909     | XM_011543019 | CASP4 | 0.001122082 | 5UTR |
| hsa-miR-3120-5p  | XM_011543019 | CASP4 | 0.002982281 | CDS  |
| hsa-miR-3122     | XM_011543019 | CASP4 | 0.000578367 | CDS  |
| hsa-miR-3125     | XM_011543019 | CASP4 | 0.2188127   | CDS  |
| hsa-miR-3125     | XM_011543019 | CASP4 | 0.000190781 | CDS  |
| hsa-miR-3127-5p  | XM_011543019 | CASP4 | 8.66E-05    | CDS  |
| hsa-miR-3127-3p  | XM_011543019 | CASP4 | 0.003175839 | CDS  |
| hsa-miR-3130-5p  | XM_011543019 | CASP4 | 0.000736504 | 5UTR |
| hsa-miR-3131     | XM_011543019 | CASP4 | 0.000275604 | CDS  |
| hsa-miR-3131     | XM_011543019 | CASP4 | 0.000122406 | CDS  |
| hsa-miR-3132     | XM_011543019 | CASP4 | 0.000659309 | 5UTR |
| hsa-miR-378b     | XM_011543019 | CASP4 | 4.93E-05    | CDS  |
| hsa-miR-3135a    | XM_011543019 | CASP4 | 0.001142641 | 5UTR |
| hsa-miR-3135a    | XM_011543019 | CASP4 | 0.000583799 | CDS  |
| hsa-miR-3136-5p  | XM_011543019 | CASP4 | 0.000811613 | CDS  |
| hsa-miR-544b     | XM_011543019 | CASP4 | 0.002982281 | CDS  |
| hsa-miR-3137     | XM_011543019 | CASP4 | 4.61E-06    | CDS  |
| hsa-miR-3141     | XM_011543019 | CASP4 | 0.005208109 | CDS  |
| hsa-miR-3142     | XM_011543019 | CASP4 | 0.000781748 | CDS  |
| hsa-miR-3146     | XM_011543019 | CASP4 | 0.005841042 | CDS  |
| hsa-miR-3147     | XM_011543019 | CASP4 | 4.34E-05    | CDS  |
| hsa-miR-3147     | XM_011543019 | CASP4 | 0.2188127   | CDS  |
| hsa-miR-3147     | XM_011543019 | CASP4 | 0.000867817 | CDS  |
| hsa-miR-3150a-3p | XM_011543019 | CASP4 | 0.01583934  | 5UTR |

|                 |              |       |             |      |
|-----------------|--------------|-------|-------------|------|
| hsa-miR-3151-5p | XM_011543019 | CASP4 | 4.34E-05    | CDS  |
| hsa-miR-3151-3p | XM_011543019 | CASP4 | 1.38E-05    | CDS  |
| hsa-miR-3152-5p | XM_011543019 | CASP4 | 5.76E-05    | 5UTR |
| hsa-miR-3152-5p | XM_011543019 | CASP4 | 0.00136803  | 5UTR |
| hsa-miR-3154    | XM_011543019 | CASP4 | 0.006369709 | 3UTR |
| hsa-miR-3154    | XM_011543019 | CASP4 | 0.000592024 | CDS  |
| hsa-miR-3155a   | XM_011543019 | CASP4 | 0.001474321 | CDS  |
| hsa-miR-3155a   | XM_011543019 | CASP4 | 0.002981617 | CDS  |
| hsa-miR-3156-5p | XM_011543019 | CASP4 | 0.0357771   | CDS  |
| hsa-miR-3156-3p | XM_011543019 | CASP4 | 0.001140635 | CDS  |
| hsa-miR-3157-5p | XM_011543019 | CASP4 | 0.002517568 | CDS  |
| hsa-miR-3158-5p | XM_011543019 | CASP4 | 0.001301877 | CDS  |
| hsa-miR-3158-3p | XM_011543019 | CASP4 | 0.01085729  | CDS  |
| hsa-miR-3158-3p | XM_011543019 | CASP4 | 0.000193288 | CDS  |
| hsa-miR-3160-5p | XM_011543019 | CASP4 | 0.000256876 | CDS  |
| hsa-miR-3160-5p | XM_011543019 | CASP4 | 0.000579714 | CDS  |
| hsa-miR-3161    | XM_011543019 | CASP4 | 0.1229816   | CDS  |
| hsa-miR-3162-5p | XM_011543019 | CASP4 | 0.000592024 | CDS  |
| hsa-miR-3165    | XM_011543019 | CASP4 | 0.07405253  | 5UTR |
| hsa-miR-3169    | XM_011543019 | CASP4 | 8.66E-05    | CDS  |
| hsa-miR-3170    | XM_011543019 | CASP4 | 0.002808639 | 5UTR |
| hsa-miR-3173-5p | XM_011543019 | CASP4 | 0.00131835  | CDS  |
| hsa-miR-3173-3p | XM_011543019 | CASP4 | 0.006369709 | CDS  |
| hsa-miR-323b-5p | XM_011543019 | CASP4 | 8.94E-05    | 5UTR |
| hsa-miR-3174    | XM_011543019 | CASP4 | 0.00241962  | 5UTR |
| hsa-miR-3174    | XM_011543019 | CASP4 | 0.004446168 | CDS  |
| hsa-miR-3176    | XM_011543019 | CASP4 | 4.34E-05    | CDS  |
| hsa-miR-3177-5p | XM_011543019 | CASP4 | 0.03971412  | CDS  |
| hsa-miR-3177-3p | XM_011543019 | CASP4 | 2.20E-05    | CDS  |
| hsa-miR-3177-3p | XM_011543019 | CASP4 | 0.000268314 | CDS  |
| hsa-miR-3180-5p | XM_011543019 | CASP4 | 0.002870221 | CDS  |
| hsa-miR-3180-3p | XM_011543019 | CASP4 | 0.001560807 | CDS  |
| hsa-miR-3181    | XM_011543019 | CASP4 | 8.39E-06    | CDS  |
| hsa-miR-3181    | XM_011543019 | CASP4 | 0.00124429  | CDS  |
| hsa-miR-3183    | XM_011543019 | CASP4 | 5.76E-05    | 5UTR |
| hsa-miR-3184-5p | XM_011543019 | CASP4 | 0.008550279 | 5UTR |
| hsa-miR-3184-5p | XM_011543019 | CASP4 | 8.78E-05    | 5UTR |
| hsa-miR-3065-3p | XM_011543019 | CASP4 | 0.001117584 | 5UTR |
| hsa-miR-3186-5p | XM_011543019 | CASP4 | 0.009314406 | CDS  |
| hsa-miR-3187-5p | XM_011543019 | CASP4 | 0.01923861  | CDS  |
| hsa-miR-3187-5p | XM_011543019 | CASP4 | 4.84E-05    | CDS  |
| hsa-miR-3187-3p | XM_011543019 | CASP4 | 0.000152911 | 5UTR |
| hsa-miR-3188    | XM_011543019 | CASP4 | 0.01076079  | CDS  |
| hsa-miR-3189-5p | XM_011543019 | CASP4 | 9.07E-06    | CDS  |

|                 |              |       |             |      |
|-----------------|--------------|-------|-------------|------|
| hsa-miR-3189-3p | XM_011543019 | CASP4 | 0.001807756 | CDS  |
| hsa-miR-320e    | XM_011543019 | CASP4 | 0.0218458   | CDS  |
| hsa-miR-3190-5p | XM_011543019 | CASP4 | 3.30E-05    | CDS  |
| hsa-miR-3190-3p | XM_011543019 | CASP4 | 0.36122     | CDS  |
| hsa-miR-3191-5p | XM_011543019 | CASP4 | 0.000957196 | CDS  |
| hsa-miR-3191-3p | XM_011543019 | CASP4 | 1.16E-05    | CDS  |
| hsa-miR-3191-3p | XM_011543019 | CASP4 | 0.002726335 | CDS  |
| hsa-miR-3192-5p | XM_011543019 | CASP4 | 0.03101366  | CDS  |
| hsa-miR-3192-5p | XM_011543019 | CASP4 | 3.01E-06    | CDS  |
| hsa-miR-3192-3p | XM_011543019 | CASP4 | 0.005658901 | CDS  |
| hsa-miR-3194-5p | XM_011543019 | CASP4 | 0.000983833 | 5UTR |
| hsa-miR-3194-3p | XM_011543019 | CASP4 | 0.000317383 | CDS  |
| hsa-miR-3196    | XM_011543019 | CASP4 | 2.49E-05    | 5UTR |
| hsa-miR-3196    | XM_011543019 | CASP4 | 0.005060872 | 3UTR |
| hsa-miR-3197    | XM_011543019 | CASP4 | 0.000867817 | CDS  |
| hsa-miR-3197    | XM_011543019 | CASP4 | 0.005060872 | 3UTR |
| hsa-miR-3200-3p | XM_011543019 | CASP4 | 6.27E-05    | CDS  |
| hsa-miR-514b-5p | XM_011543019 | CASP4 | 0.000470238 | CDS  |
| hsa-miR-514b-3p | XM_011543019 | CASP4 | 5.83E-05    | CDS  |
| hsa-miR-514b-3p | XM_011543019 | CASP4 | 0.000432335 | 5UTR |
| hsa-miR-514b-3p | XM_011543019 | CASP4 | 0.001455093 | 5UTR |
| hsa-miR-4296    | XM_011543019 | CASP4 | 0.004418741 | CDS  |
| hsa-miR-4297    | XM_011543019 | CASP4 | 0.007719451 | 5UTR |
| hsa-miR-378c    | XM_011543019 | CASP4 | 0.01583934  | 5UTR |
| hsa-miR-4294    | XM_011543019 | CASP4 | 0.003143502 | 5UTR |
| hsa-miR-4298    | XM_011543019 | CASP4 | 4.84E-05    | CDS  |
| hsa-miR-4304    | XM_011543019 | CASP4 | 0.001365539 | 5UTR |
| hsa-miR-4302    | XM_011543019 | CASP4 | 9.37E-05    | CDS  |
| hsa-miR-4305    | XM_011543019 | CASP4 | 0.001474321 | CDS  |
| hsa-miR-4308    | XM_011543019 | CASP4 | 0.002311532 | CDS  |
| hsa-miR-4308    | XM_011543019 | CASP4 | 0.004508277 | CDS  |
| hsa-miR-4315    | XM_011543019 | CASP4 | 0.001140635 | CDS  |
| hsa-miR-4314    | XM_011543019 | CASP4 | 2.44E-05    | CDS  |
| hsa-miR-4320    | XM_011543019 | CASP4 | 0.01193851  | CDS  |
| hsa-miR-4320    | XM_011543019 | CASP4 | 0.005669939 | CDS  |
| hsa-miR-4317    | XM_011543019 | CASP4 | 0.001495267 | 5UTR |
| hsa-miR-4322    | XM_011543019 | CASP4 | 0.09865273  | 5UTR |
| hsa-miR-4256    | XM_011543019 | CASP4 | 0.2224987   | 3UTR |
| hsa-miR-4259    | XM_011543019 | CASP4 | 0.01415603  | 5UTR |
| hsa-miR-4260    | XM_011543019 | CASP4 | 0.008948377 | CDS  |
| hsa-miR-4260    | XM_011543019 | CASP4 | 0.008863281 | CDS  |
| hsa-miR-4254    | XM_011543019 | CASP4 | 0.001058085 | CDS  |
| hsa-miR-4254    | XM_011543019 | CASP4 | 8.39E-06    | CDS  |
| hsa-miR-4252    | XM_011543019 | CASP4 | 0.001122082 | 5UTR |



|                  |              |       |             |      |
|------------------|--------------|-------|-------------|------|
| hsa-miR-4326     | XM_011543019 | CASP4 | 0.001455093 | 5UTR |
| hsa-miR-4327     | XM_011543019 | CASP4 | 0.008463178 | 5UTR |
| hsa-miR-4327     | XM_011543019 | CASP4 | 0.00048512  | 5UTR |
| hsa-miR-4265     | XM_011543019 | CASP4 | 0.001806281 | CDS  |
| hsa-miR-4265     | XM_011543019 | CASP4 | 0.01274028  | CDS  |
| hsa-miR-4266     | XM_011543019 | CASP4 | 0.005953452 | 3UTR |
| hsa-miR-4268     | XM_011543019 | CASP4 | 0.001427036 | CDS  |
| hsa-miR-4268     | XM_011543019 | CASP4 | 0.01017319  | CDS  |
| hsa-miR-4269     | XM_011543019 | CASP4 | 0.01082276  | CDS  |
| hsa-miR-4270     | XM_011543019 | CASP4 | 0.002868814 | CDS  |
| hsa-miR-4270     | XM_011543019 | CASP4 | 0.005156117 | CDS  |
| hsa-miR-4270     | XM_011543019 | CASP4 | 0.008560229 | CDS  |
| hsa-miR-4271     | XM_011543019 | CASP4 | 0.260039    | 5UTR |
| hsa-miR-4281     | XM_011543019 | CASP4 | 0.000661315 | 3UTR |
| hsa-miR-4277     | XM_011543019 | CASP4 | 0.008145339 | CDS  |
| hsa-miR-4284     | XM_011543019 | CASP4 | 9.12E-06    | CDS  |
| hsa-miR-4286     | XM_011543019 | CASP4 | 0.00307967  | CDS  |
| hsa-miR-4289     | XM_011543019 | CASP4 | 4.82E-05    | CDS  |
| hsa-miR-4290     | XM_011543019 | CASP4 | 0.3503675   | 5UTR |
| hsa-miR-4329     | XM_011543019 | CASP4 | 5.70E-05    | CDS  |
| hsa-miR-3605-5p  | XM_011543019 | CASP4 | 0.000275604 | CDS  |
| hsa-miR-3610     | XM_011543019 | CASP4 | 0.04098359  | 3UTR |
| hsa-miR-3614-5p  | XM_011543019 | CASP4 | 0.000231173 | CDS  |
| hsa-miR-3615     | XM_011543019 | CASP4 | 2.27E-05    | CDS  |
| hsa-miR-3615     | XM_011543019 | CASP4 | 0.000525684 | CDS  |
| hsa-miR-3616-3p  | XM_011543019 | CASP4 | 0.01778475  | 5UTR |
| hsa-miR-3616-3p  | XM_011543019 | CASP4 | 0.00080334  | CDS  |
| hsa-miR-3619-5p  | XM_011543019 | CASP4 | 0.00013726  | CDS  |
| hsa-miR-3619-5p  | XM_011543019 | CASP4 | 0.002150872 | CDS  |
| hsa-miR-3620-5p  | XM_011543019 | CASP4 | 0.006819084 | CDS  |
| hsa-miR-3621     | XM_011543019 | CASP4 | 0.000864707 | 5UTR |
| hsa-miR-3622a-5p | XM_011543019 | CASP4 | 0.00104551  | CDS  |
| hsa-miR-3622a-5p | XM_011543019 | CASP4 | 0.009314406 | CDS  |
| hsa-miR-3622b-5p | XM_011543019 | CASP4 | 0.000844485 | CDS  |
| hsa-miR-3622b-5p | XM_011543019 | CASP4 | 0.00438586  | CDS  |
| hsa-miR-3622b-3p | XM_011543019 | CASP4 | 0.000188063 | CDS  |
| hsa-miR-3646     | XM_011543019 | CASP4 | 0.08274242  | CDS  |
| hsa-miR-3648     | XM_011543019 | CASP4 | 0.001122082 | 5UTR |
| hsa-miR-3648     | XM_011543019 | CASP4 | 0.000127802 | CDS  |
| hsa-miR-3649     | XM_011543019 | CASP4 | 0.001160472 | CDS  |
| hsa-miR-3650     | XM_011543019 | CASP4 | 0.01350715  | CDS  |
| hsa-miR-3650     | XM_011543019 | CASP4 | 0.419973    | CDS  |
| hsa-miR-3652     | XM_011543019 | CASP4 | 0.002517568 | CDS  |
| hsa-miR-3652     | XM_011543019 | CASP4 | 0.006538049 | CDS  |

|                  |              |       |             |      |
|------------------|--------------|-------|-------------|------|
| hsa-miR-3654     | XM_011543019 | CASP4 | 0.000576363 | CDS  |
| hsa-miR-3654     | XM_011543019 | CASP4 | 4.48E-05    | CDS  |
| hsa-miR-3655     | XM_011543019 | CASP4 | 0.000959687 | 5UTR |
| hsa-miR-3659     | XM_011543019 | CASP4 | 2.27E-06    | CDS  |
| hsa-miR-3659     | XM_011543019 | CASP4 | 0.002095427 | CDS  |
| hsa-miR-3661     | XM_011543019 | CASP4 | 0.001142641 | 5UTR |
| hsa-miR-3663-5p  | XM_011543019 | CASP4 | 0.000231173 | CDS  |
| hsa-miR-3663-5p  | XM_011543019 | CASP4 | 0.0218458   | 3UTR |
| hsa-miR-3663-3p  | XM_011543019 | CASP4 | 4.82E-05    | CDS  |
| hsa-miR-3667-5p  | XM_011543019 | CASP4 | 0.000379457 | 5UTR |
| hsa-miR-3667-3p  | XM_011543019 | CASP4 | 0.003929355 | CDS  |
| hsa-miR-3670     | XM_011543019 | CASP4 | 0.01085729  | CDS  |
| hsa-miR-3670     | XM_011543019 | CASP4 | 0.002698706 | CDS  |
| hsa-miR-3675-5p  | XM_011543019 | CASP4 | 0.01350715  | CDS  |
| hsa-miR-3677-5p  | XM_011543019 | CASP4 | 0.000530791 | CDS  |
| hsa-miR-3677-5p  | XM_011543019 | CASP4 | 0.002346691 | CDS  |
| hsa-miR-3677-3p  | XM_011543019 | CASP4 | 4.95E-07    | CDS  |
| hsa-miR-3678-3p  | XM_011543019 | CASP4 | 0.002472239 | 5UTR |
| hsa-miR-3679-5p  | XM_011543019 | CASP4 | 0.006276804 | CDS  |
| hsa-miR-3679-5p  | XM_011543019 | CASP4 | 0.002726335 | CDS  |
| hsa-miR-3680-3p  | XM_011543019 | CASP4 | 4.95E-07    | CDS  |
| hsa-miR-3681-5p  | XM_011543019 | CASP4 | 0.06288141  | 5UTR |
| hsa-miR-3681-5p  | XM_011543019 | CASP4 | 0.001586598 | CDS  |
| hsa-miR-3682-3p  | XM_011543019 | CASP4 | 0.001680409 | CDS  |
| hsa-miR-3688-5p  | XM_011543019 | CASP4 | 0.000530791 | CDS  |
| hsa-miR-3688-3p  | XM_011543019 | CASP4 | 0.003143502 | 5UTR |
| hsa-miR-3689a-5p | XM_011543019 | CASP4 | 0.004891425 | CDS  |
| hsa-miR-3689a-3p | XM_011543019 | CASP4 | 0.02723061  | CDS  |
| hsa-miR-3689a-3p | XM_011543019 | CASP4 | 0.157008    | CDS  |
| hsa-miR-3690     | XM_011543019 | CASP4 | 0.001474321 | CDS  |
| hsa-miR-3691-5p  | XM_011543019 | CASP4 | 6.04E-05    | CDS  |
| hsa-miR-3692-5p  | XM_011543019 | CASP4 | 0.002982281 | CDS  |
| hsa-miR-3180     | XM_011543019 | CASP4 | 0.01583934  | 5UTR |
| hsa-miR-3180     | XM_011543019 | CASP4 | 0.001560807 | CDS  |
| hsa-miR-3907     | XM_011543019 | CASP4 | 0.000125909 | CDS  |
| hsa-miR-3907     | XM_011543019 | CASP4 | 0.000661315 | 3UTR |
| hsa-miR-3689b-5p | XM_011543019 | CASP4 | 0.004891425 | CDS  |
| hsa-miR-3689b-3p | XM_011543019 | CASP4 | 0.157008    | CDS  |
| hsa-miR-3689b-3p | XM_011543019 | CASP4 | 0.02723061  | CDS  |
| hsa-miR-3689b-3p | XM_011543019 | CASP4 | 0.005953452 | 3UTR |
| hsa-miR-3909     | XM_011543019 | CASP4 | 5.42E-05    | CDS  |
| hsa-miR-3909     | XM_011543019 | CASP4 | 4.32E-05    | CDS  |
| hsa-miR-3911     | XM_011543019 | CASP4 | 0.00275918  | CDS  |
| hsa-miR-3911     | XM_011543019 | CASP4 | 0.01007283  | CDS  |

|                   |              |       |             |      |
|-------------------|--------------|-------|-------------|------|
| hsa-miR-3911      | XM_011543019 | CASP4 | 0.000178408 | CDS  |
| hsa-miR-3917      | XM_011543019 | CASP4 | 0.009826038 | CDS  |
| hsa-miR-3917      | XM_011543019 | CASP4 | 0.000604446 | CDS  |
| hsa-miR-3918      | XM_011543019 | CASP4 | 0.000891406 | CDS  |
| hsa-miR-3150b-5p  | XM_011543019 | CASP4 | 0.001058085 | CDS  |
| hsa-miR-3150b-3p  | XM_011543019 | CASP4 | 0.001074767 | 5UTR |
| hsa-miR-3922-5p   | XM_011543019 | CASP4 | 0.000781748 | CDS  |
| hsa-miR-3922-3p   | XM_011543019 | CASP4 | 0.009638896 | 5UTR |
| hsa-miR-3925-5p   | XM_011543019 | CASP4 | 0.07838235  | CDS  |
| hsa-miR-3928-3p   | XM_011543019 | CASP4 | 2.49E-05    | 5UTR |
| hsa-miR-3928-3p   | XM_011543019 | CASP4 | 0.00438586  | CDS  |
| hsa-miR-3934-5p   | XM_011543019 | CASP4 | 2.78E-05    | CDS  |
| hsa-miR-3934-3p   | XM_011543019 | CASP4 | 0.000411097 | 5UTR |
| hsa-miR-3935      | XM_011543019 | CASP4 | 0.07838235  | CDS  |
| hsa-miR-3937      | XM_011543019 | CASP4 | 0.2003249   | 3UTR |
| hsa-miR-3939      | XM_011543019 | CASP4 | 0.000131593 | CDS  |
| hsa-miR-3940-5p   | XM_011543019 | CASP4 | 0.01274028  | CDS  |
| hsa-miR-3940-5p   | XM_011543019 | CASP4 | 0.03540022  | 5UTR |
| hsa-miR-3940-5p   | XM_011543019 | CASP4 | 0.005953452 | 3UTR |
| hsa-miR-3940-3p   | XM_011543019 | CASP4 | 0.001122082 | 5UTR |
| hsa-miR-3943      | XM_011543019 | CASP4 | 8.39E-06    | CDS  |
| hsa-miR-3943      | XM_011543019 | CASP4 | 0.007399047 | CDS  |
| hsa-miR-3944-5p   | XM_011543019 | CASP4 | 0.000268079 | CDS  |
| hsa-miR-3944-5p   | XM_011543019 | CASP4 | 4.32E-05    | CDS  |
| hsa-miR-3944-3p   | XM_011543019 | CASP4 | 0.006819084 | CDS  |
| hsa-miR-3945      | XM_011543019 | CASP4 | 0.001560807 | CDS  |
| hsa-miR-642b-5p   | XM_011543019 | CASP4 | 0.001427036 | CDS  |
| hsa-miR-550b-2-5p | XM_011543019 | CASP4 | 0.001142641 | 5UTR |
| hsa-miR-550b-2-5p | XM_011543019 | CASP4 | 0.01917344  | 5UTR |
| hsa-miR-548o-5p   | XM_011543019 | CASP4 | 0.03571082  | 5UTR |
| hsa-miR-1268b     | XM_011543019 | CASP4 | 0.005546619 | CDS  |
| hsa-miR-4418      | XM_011543019 | CASP4 | 3.48E-05    | 5UTR |
| hsa-miR-4422      | XM_011543019 | CASP4 | 0.000379457 | 5UTR |
| hsa-miR-4423-5p   | XM_011543019 | CASP4 | 0.0023921   | 5UTR |
| hsa-miR-378g      | XM_011543019 | CASP4 | 0.002400999 | 5UTR |
| hsa-miR-378g      | XM_011543019 | CASP4 | 0.01923861  | 3UTR |
| hsa-miR-4425      | XM_011543019 | CASP4 | 0.001142641 | 5UTR |
| hsa-miR-4429      | XM_011543019 | CASP4 | 0.0218458   | CDS  |
| hsa-miR-4433a-5p  | XM_011543019 | CASP4 | 9.12E-06    | CDS  |
| hsa-miR-4433a-3p  | XM_011543019 | CASP4 | 0.001680409 | CDS  |
| hsa-miR-4433a-3p  | XM_011543019 | CASP4 | 0.004404006 | CDS  |
| hsa-miR-4436a     | XM_011543019 | CASP4 | 4.12E-05    | 5UTR |
| hsa-miR-4437      | XM_011543019 | CASP4 | 0.002400999 | 5UTR |
| hsa-miR-4437      | XM_011543019 | CASP4 | 0.003070085 | 5UTR |

|                 |              |       |             |      |
|-----------------|--------------|-------|-------------|------|
| hsa-miR-4439    | XM_011543019 | CASP4 | 0.004446168 | CDS  |
| hsa-miR-4439    | XM_011543019 | CASP4 | 0.001321211 | 5UTR |
| hsa-miR-4440    | XM_011543019 | CASP4 | 0.001431946 | CDS  |
| hsa-miR-4440    | XM_011543019 | CASP4 | 0.01298236  | 3UTR |
| hsa-miR-4440    | XM_011543019 | CASP4 | 0.000207738 | 5UTR |
| hsa-miR-4441    | XM_011543019 | CASP4 | 0.001680409 | CDS  |
| hsa-miR-4441    | XM_011543019 | CASP4 | 0.005762653 | 5UTR |
| hsa-miR-4443    | XM_011543019 | CASP4 | 0.005060872 | 3UTR |
| hsa-miR-4443    | XM_011543019 | CASP4 | 0.157008    | CDS  |
| hsa-miR-4444    | XM_011543019 | CASP4 | 0.000907814 | CDS  |
| hsa-miR-4446-5p | XM_011543019 | CASP4 | 0.001494617 | CDS  |
| hsa-miR-4446-3p | XM_011543019 | CASP4 | 2.78E-05    | CDS  |
| hsa-miR-4446-3p | XM_011543019 | CASP4 | 4.39E-05    | CDS  |
| hsa-miR-4447    | XM_011543019 | CASP4 | 0.01469811  | CDS  |
| hsa-miR-4448    | XM_011543019 | CASP4 | 0.01017319  | CDS  |
| hsa-miR-4448    | XM_011543019 | CASP4 | 0.000635321 | 3UTR |
| hsa-miR-548ag   | XM_011543019 | CASP4 | 0.007316432 | 5UTR |
| hsa-miR-548ag   | XM_011543019 | CASP4 | 0.009503041 | CDS  |
| hsa-miR-4450    | XM_011543019 | CASP4 | 0.001249294 | 5UTR |
| hsa-miR-4450    | XM_011543019 | CASP4 | 0.272542    | 5UTR |
| hsa-miR-4450    | XM_011543019 | CASP4 | 0.01506736  | CDS  |
| hsa-miR-4450    | XM_011543019 | CASP4 | 0.01093692  | CDS  |
| hsa-miR-4451    | XM_011543019 | CASP4 | 0.000864707 | 5UTR |
| hsa-miR-4453    | XM_011543019 | CASP4 | 0.00215005  | CDS  |
| hsa-miR-4453    | XM_011543019 | CASP4 | 0.000309971 | CDS  |
| hsa-miR-4455    | XM_011543019 | CASP4 | 0.01076079  | CDS  |
| hsa-miR-4456    | XM_011543019 | CASP4 | 0.000836616 | CDS  |
| hsa-miR-4458    | XM_011543019 | CASP4 | 0.1524418   | CDS  |
| hsa-miR-4458    | XM_011543019 | CASP4 | 0.002150872 | CDS  |
| hsa-miR-378h    | XM_011543019 | CASP4 | 0.02723061  | CDS  |
| hsa-miR-3135b   | XM_011543019 | CASP4 | 0.000314076 | CDS  |
| hsa-miR-3135b   | XM_011543019 | CASP4 | 0.006538049 | 3UTR |
| hsa-miR-4462    | XM_011543019 | CASP4 | 0.004644262 | CDS  |
| hsa-miR-4463    | XM_011543019 | CASP4 | 0.000256876 | 5UTR |
| hsa-miR-4463    | XM_011543019 | CASP4 | 0.006733282 | CDS  |
| hsa-miR-4468    | XM_011543019 | CASP4 | 0.002698706 | CDS  |
| hsa-miR-4469    | XM_011543019 | CASP4 | 0.00011745  | CDS  |
| hsa-miR-4469    | XM_011543019 | CASP4 | 0.01853112  | CDS  |
| hsa-miR-4472    | XM_011543019 | CASP4 | 0.2527227   | 5UTR |
| hsa-miR-4472    | XM_011543019 | CASP4 | 5.34E-05    | 5UTR |
| hsa-miR-4474-3p | XM_011543019 | CASP4 | 0.000164883 | CDS  |
| hsa-miR-4476    | XM_011543019 | CASP4 | 0.001680409 | CDS  |
| hsa-miR-4478    | XM_011543019 | CASP4 | 0.001723097 | CDS  |
| hsa-miR-4478    | XM_011543019 | CASP4 | 0.001396956 | 5UTR |

|                 |              |       |             |      |
|-----------------|--------------|-------|-------------|------|
| hsa-miR-3689c   | XM_011543019 | CASP4 | 0.157008    | CDS  |
| hsa-miR-3689c   | XM_011543019 | CASP4 | 0.02723061  | CDS  |
| hsa-miR-3689c   | XM_011543019 | CASP4 | 0.005953452 | 3UTR |
| hsa-miR-3689d   | XM_011543019 | CASP4 | 0.000867817 | CDS  |
| hsa-miR-3689d   | XM_011543019 | CASP4 | 7.63E-06    | CDS  |
| hsa-miR-3689e   | XM_011543019 | CASP4 | 0.004891425 | CDS  |
| hsa-miR-3155b   | XM_011543019 | CASP4 | 0.001474321 | CDS  |
| hsa-miR-3155b   | XM_011543019 | CASP4 | 0.002981617 | CDS  |
| hsa-miR-4481    | XM_011543019 | CASP4 | 0.005060872 | 3UTR |
| hsa-miR-4482-5p | XM_011543019 | CASP4 | 2.02E-05    | CDS  |
| hsa-miR-4482-5p | XM_011543019 | CASP4 | 0.000469015 | 5UTR |
| hsa-miR-4482-3p | XM_011543019 | CASP4 | 0.000135284 | CDS  |
| hsa-miR-4485-3p | XM_011543019 | CASP4 | 0.000891406 | CDS  |
| hsa-miR-4486    | XM_011543019 | CASP4 | 0.0218458   | 3UTR |
| hsa-miR-4486    | XM_011543019 | CASP4 | 7.30E-05    | CDS  |
| hsa-miR-4486    | XM_011543019 | CASP4 | 0.000576363 | CDS  |
| hsa-miR-4487    | XM_011543019 | CASP4 | 0.000723216 | CDS  |
| hsa-miR-4488    | XM_011543019 | CASP4 | 0.005208109 | 3UTR |
| hsa-miR-4488    | XM_011543019 | CASP4 | 0.01469811  | CDS  |
| hsa-miR-4492    | XM_011543019 | CASP4 | 0.005598497 | CDS  |
| hsa-miR-4492    | XM_011543019 | CASP4 | 0.002150872 | CDS  |
| hsa-miR-4493    | XM_011543019 | CASP4 | 0.01017319  | CDS  |
| hsa-miR-4494    | XM_011543019 | CASP4 | 0.001474321 | CDS  |
| hsa-miR-4496    | XM_011543019 | CASP4 | 0.001723097 | CDS  |
| hsa-miR-4497    | XM_011543019 | CASP4 | 0.000637219 | 3UTR |
| hsa-miR-4497    | XM_011543019 | CASP4 | 1.16E-06    | CDS  |
| hsa-miR-4498    | XM_011543019 | CASP4 | 0.00027619  | CDS  |
| hsa-miR-4498    | XM_011543019 | CASP4 | 0.006819084 | 3UTR |
| hsa-miR-4498    | XM_011543019 | CASP4 | 0.003070085 | 5UTR |
| hsa-miR-4499    | XM_011543019 | CASP4 | 0.000316826 | CDS  |
| hsa-miR-4499    | XM_011543019 | CASP4 | 0.006733282 | CDS  |
| hsa-miR-4500    | XM_011543019 | CASP4 | 0.01506736  | CDS  |
| hsa-miR-4502    | XM_011543019 | CASP4 | 0.2401151   | 3UTR |
| hsa-miR-4502    | XM_011543019 | CASP4 | 0.1229816   | CDS  |
| hsa-miR-4505    | XM_011543019 | CASP4 | 0.006538049 | 3UTR |
| hsa-miR-4506    | XM_011543019 | CASP4 | 8.94E-05    | CDS  |
| hsa-miR-4506    | XM_011543019 | CASP4 | 4.36E-05    | CDS  |
| hsa-miR-2392    | XM_011543019 | CASP4 | 4.39E-05    | CDS  |
| hsa-miR-2392    | XM_011543019 | CASP4 | 0.004667567 | CDS  |
| hsa-miR-4507    | XM_011543019 | CASP4 | 0.005953452 | 3UTR |
| hsa-miR-4508    | XM_011543019 | CASP4 | 0.005598497 | CDS  |
| hsa-miR-4508    | XM_011543019 | CASP4 | 2.70E-05    | CDS  |
| hsa-miR-4511    | XM_011543019 | CASP4 | 0.02923916  | 5UTR |
| hsa-miR-4513    | XM_011543019 | CASP4 | 0.000316826 | CDS  |

|                  |              |       |             |      |
|------------------|--------------|-------|-------------|------|
| hsa-miR-4515     | XM_011543019 | CASP4 | 0.000353171 | CDS  |
| hsa-miR-4516     | XM_011543019 | CASP4 | 0.02336121  | CDS  |
| hsa-miR-4518     | XM_011543019 | CASP4 | 0.001122082 | 5UTR |
| hsa-miR-4519     | XM_011543019 | CASP4 | 0.009414375 | CDS  |
| hsa-miR-4521     | XM_011543019 | CASP4 | 0.000807785 | 5UTR |
| hsa-miR-4522     | XM_011543019 | CASP4 | 6.22E-06    | CDS  |
| hsa-miR-4523     | XM_011543019 | CASP4 | 0.0122035   | 5UTR |
| hsa-miR-4523     | XM_011543019 | CASP4 | 0.01753545  | 3UTR |
| hsa-miR-4525     | XM_011543019 | CASP4 | 0.005060872 | 3UTR |
| hsa-miR-4525     | XM_011543019 | CASP4 | 8.44E-05    | CDS  |
| hsa-miR-4525     | XM_011543019 | CASP4 | 0.02336121  | CDS  |
| hsa-miR-4525     | XM_011543019 | CASP4 | 0.260039    | 5UTR |
| hsa-miR-4526     | XM_011543019 | CASP4 | 0.002303406 | CDS  |
| hsa-miR-4529-5p  | XM_011543019 | CASP4 | 0.002386612 | 5UTR |
| hsa-miR-4529-3p  | XM_011543019 | CASP4 | 0.000709764 | 5UTR |
| hsa-miR-4529-3p  | XM_011543019 | CASP4 | 4.48E-05    | CDS  |
| hsa-miR-4534     | XM_011543019 | CASP4 | 0.000346078 | CDS  |
| hsa-miR-4534     | XM_011543019 | CASP4 | 0.000576363 | CDS  |
| hsa-miR-4534     | XM_011543019 | CASP4 | 0.1044673   | CDS  |
| hsa-miR-4534     | XM_011543019 | CASP4 | 0.01753545  | 3UTR |
| hsa-miR-4535     | XM_011543019 | CASP4 | 0.000428783 | CDS  |
| hsa-miR-548am-5p | XM_011543019 | CASP4 | 0.03571082  | 5UTR |
| hsa-miR-1587     | XM_011543019 | CASP4 | 0.006819084 | CDS  |
| hsa-miR-548an    | XM_011543019 | CASP4 | 0.1530227   | CDS  |
| hsa-miR-4538     | XM_011543019 | CASP4 | 0.01753545  | 3UTR |
| hsa-miR-4538     | XM_011543019 | CASP4 | 0.000381243 | 5UTR |
| hsa-miR-4539     | XM_011543019 | CASP4 | 0.03290779  | CDS  |
| hsa-miR-4539     | XM_011543019 | CASP4 | 0.000635321 | 3UTR |
| hsa-miR-4540     | XM_011543019 | CASP4 | 0.01637427  | 5UTR |
| hsa-miR-3960     | XM_011543019 | CASP4 | 9.59E-05    | CDS  |
| hsa-miR-3960     | XM_011543019 | CASP4 | 1.41E-05    | CDS  |
| hsa-miR-3972     | XM_011543019 | CASP4 | 0.007399047 | CDS  |
| hsa-miR-3972     | XM_011543019 | CASP4 | 0.000268314 | CDS  |
| hsa-miR-3973     | XM_011543019 | CASP4 | 0.000203446 | CDS  |
| hsa-miR-3974     | XM_011543019 | CASP4 | 0.000781748 | CDS  |
| hsa-miR-3976     | XM_011543019 | CASP4 | 0.002558787 | CDS  |
| hsa-miR-3978     | XM_011543019 | CASP4 | 0.001000701 | 5UTR |
| hsa-miR-4632-5p  | XM_011543019 | CASP4 | 0.000717477 | CDS  |
| hsa-miR-4632-5p  | XM_011543019 | CASP4 | 0.002868814 | CDS  |
| hsa-miR-4632-5p  | XM_011543019 | CASP4 | 0.005208109 | CDS  |
| hsa-miR-4632-3p  | XM_011543019 | CASP4 | 8.39E-06    | CDS  |
| hsa-miR-4633-3p  | XM_011543019 | CASP4 | 0.002868814 | CDS  |
| hsa-miR-4634     | XM_011543019 | CASP4 | 2.83E-05    | CDS  |
| hsa-miR-4634     | XM_011543019 | CASP4 | 0.000437056 | 5UTR |

|                  |              |       |             |      |
|------------------|--------------|-------|-------------|------|
| hsa-miR-4638-5p  | XM_011543019 | CASP4 | 0.01923861  | 3UTR |
| hsa-miR-4638-3p  | XM_011543019 | CASP4 | 0.000576363 | CDS  |
| hsa-miR-4638-3p  | XM_011543019 | CASP4 | 0.000837243 | 5UTR |
| hsa-miR-4640-5p  | XM_011543019 | CASP4 | 0.000152911 | 5UTR |
| hsa-miR-4640-5p  | XM_011543019 | CASP4 | 0.001122082 | 5UTR |
| hsa-miR-4640-3p  | XM_011543019 | CASP4 | 0.001338793 | 5UTR |
| hsa-miR-4641     | XM_011543019 | CASP4 | 0.007719451 | 5UTR |
| hsa-miR-4641     | XM_011543019 | CASP4 | 0.08965697  | 5UTR |
| hsa-miR-4642     | XM_011543019 | CASP4 | 0.004891425 | CDS  |
| hsa-miR-4642     | XM_011543019 | CASP4 | 0.01179483  | CDS  |
| hsa-miR-4644     | XM_011543019 | CASP4 | 0.01583934  | 5UTR |
| hsa-miR-4646-5p  | XM_011543019 | CASP4 | 0.006933323 | CDS  |
| hsa-miR-4646-5p  | XM_011543019 | CASP4 | 0.000221888 | CDS  |
| hsa-miR-4647     | XM_011543019 | CASP4 | 0.07611103  | CDS  |
| hsa-miR-4647     | XM_011543019 | CASP4 | 0.03313369  | CDS  |
| hsa-miR-4649-5p  | XM_011543019 | CASP4 | 0.000678839 | 5UTR |
| hsa-miR-4649-3p  | XM_011543019 | CASP4 | 0.05874391  | 5UTR |
| hsa-miR-4650-5p  | XM_011543019 | CASP4 | 0.3503675   | 5UTR |
| hsa-miR-4651     | XM_011543019 | CASP4 | 0.000606734 | CDS  |
| hsa-miR-4651     | XM_011543019 | CASP4 | 0.01469811  | CDS  |
| hsa-miR-4652-3p  | XM_011543019 | CASP4 | 5.70E-05    | CDS  |
| hsa-miR-4653-3p  | XM_011543019 | CASP4 | 0.005060872 | CDS  |
| hsa-miR-4653-3p  | XM_011543019 | CASP4 | 0.000218895 | CDS  |
| hsa-miR-4653-3p  | XM_011543019 | CASP4 | 5.42E-05    | CDS  |
| hsa-miR-4654     | XM_011543019 | CASP4 | 0.1240252   | CDS  |
| hsa-miR-4654     | XM_011543019 | CASP4 | 1.27E-05    | CDS  |
| hsa-miR-4654     | XM_011543019 | CASP4 | 0.000353171 | CDS  |
| hsa-miR-4654     | XM_011543019 | CASP4 | 0.002698878 | CDS  |
| hsa-miR-4655-5p  | XM_011543019 | CASP4 | 0.000172777 | CDS  |
| hsa-miR-4655-5p  | XM_011543019 | CASP4 | 0.000526877 | CDS  |
| hsa-miR-4655-5p  | XM_011543019 | CASP4 | 0.04080268  | CDS  |
| hsa-miR-4656     | XM_011543019 | CASP4 | 0.003029624 | CDS  |
| hsa-miR-4656     | XM_011543019 | CASP4 | 0.009704041 | CDS  |
| hsa-miR-4656     | XM_011543019 | CASP4 | 3.43E-05    | CDS  |
| hsa-miR-4657     | XM_011543019 | CASP4 | 0.000387079 | CDS  |
| hsa-miR-4658     | XM_011543019 | CASP4 | 0.000240069 | CDS  |
| hsa-miR-4658     | XM_011543019 | CASP4 | 0.00293118  | CDS  |
| hsa-miR-4659a-5p | XM_011543019 | CASP4 | 1.28E-05    | 5UTR |
| hsa-miR-4661-5p  | XM_011543019 | CASP4 | 0.00818147  | CDS  |
| hsa-miR-4661-3p  | XM_011543019 | CASP4 | 9.12E-06    | CDS  |
| hsa-miR-4659b-3p | XM_011543019 | CASP4 | 0.000124817 | CDS  |
| hsa-miR-4659b-3p | XM_011543019 | CASP4 | 0.000299959 | CDS  |
| hsa-miR-4663     | XM_011543019 | CASP4 | 0.01082276  | CDS  |
| hsa-miR-4663     | XM_011543019 | CASP4 | 1.36E-06    | CDS  |

|                 |              |       |             |      |
|-----------------|--------------|-------|-------------|------|
| hsa-miR-4664-5p | XM_011543019 | CASP4 | 0.000278641 | CDS  |
| hsa-miR-4665-3p | XM_011543019 | CASP4 | 0.000723658 | CDS  |
| hsa-miR-4665-3p | XM_011543019 | CASP4 | 2.26E-06    | CDS  |
| hsa-miR-4667-5p | XM_011543019 | CASP4 | 0.001482999 | CDS  |
| hsa-miR-4667-3p | XM_011543019 | CASP4 | 0.005658901 | CDS  |
| hsa-miR-4667-3p | XM_011543019 | CASP4 | 8.36E-06    | CDS  |
| hsa-miR-219b-5p | XM_011543019 | CASP4 | 0.002457335 | CDS  |
| hsa-miR-219b-5p | XM_011543019 | CASP4 | 0.000875419 | 5UTR |
| hsa-miR-4669    | XM_011543019 | CASP4 | 0.000638659 | 3UTR |
| hsa-miR-4669    | XM_011543019 | CASP4 | 0.001142641 | 5UTR |
| hsa-miR-4673    | XM_011543019 | CASP4 | 0.000470238 | CDS  |
| hsa-miR-4674    | XM_011543019 | CASP4 | 0.006819084 | 3UTR |
| hsa-miR-4674    | XM_011543019 | CASP4 | 0.000616808 | CDS  |
| hsa-miR-4674    | XM_011543019 | CASP4 | 0.00215005  | CDS  |
| hsa-miR-4675    | XM_011543019 | CASP4 | 0.01412757  | CDS  |
| hsa-miR-4676-5p | XM_011543019 | CASP4 | 0.00215005  | CDS  |
| hsa-miR-4681    | XM_011543019 | CASP4 | 0.0109351   | 3UTR |
| hsa-miR-4682    | XM_011543019 | CASP4 | 0.00316216  | CDS  |
| hsa-miR-4684-5p | XM_011543019 | CASP4 | 0.000386263 | CDS  |
| hsa-miR-4685-5p | XM_011543019 | CASP4 | 0.002982281 | CDS  |
| hsa-miR-4685-5p | XM_011543019 | CASP4 | 4.84E-05    | CDS  |
| hsa-miR-4686    | XM_011543019 | CASP4 | 0.09921762  | 5UTR |
| hsa-miR-4686    | XM_011543019 | CASP4 | 0.0218458   | 3UTR |
| hsa-miR-4687-3p | XM_011543019 | CASP4 | 0.000222006 | CDS  |
| hsa-miR-4687-3p | XM_011543019 | CASP4 | 0.000678839 | 5UTR |
| hsa-miR-4687-3p | XM_011543019 | CASP4 | 0.002489073 | 5UTR |
| hsa-miR-1343-5p | XM_011543019 | CASP4 | 0.000322366 | 5UTR |
| hsa-miR-1343-5p | XM_011543019 | CASP4 | 0.001482999 | CDS  |
| hsa-miR-1343-5p | XM_011543019 | CASP4 | 0.01093692  | CDS  |
| hsa-miR-1343-5p | XM_011543019 | CASP4 | 1.92E-05    | 5UTR |
| hsa-miR-1343-3p | XM_011543019 | CASP4 | 2.11E-05    | CDS  |
| hsa-miR-1343-3p | XM_011543019 | CASP4 | 0.01597706  | CDS  |
| hsa-miR-4688    | XM_011543019 | CASP4 | 0.001160472 | CDS  |
| hsa-miR-4688    | XM_011543019 | CASP4 | 4.36E-05    | CDS  |
| hsa-miR-4689    | XM_011543019 | CASP4 | 0.002726335 | CDS  |
| hsa-miR-4689    | XM_011543019 | CASP4 | 0.001057457 | CDS  |
| hsa-miR-4689    | XM_011543019 | CASP4 | 0.04654808  | CDS  |
| hsa-miR-4690-5p | XM_011543019 | CASP4 | 0.01753545  | 3UTR |
| hsa-miR-4690-3p | XM_011543019 | CASP4 | 2.70E-05    | CDS  |
| hsa-miR-4691-5p | XM_011543019 | CASP4 | 0.000229505 | 5UTR |
| hsa-miR-4691-5p | XM_011543019 | CASP4 | 9.79E-05    | CDS  |
| hsa-miR-4691-3p | XM_011543019 | CASP4 | 0.000736504 | 5UTR |
| hsa-miR-4691-3p | XM_011543019 | CASP4 | 0.000282051 | CDS  |
| hsa-miR-4692    | XM_011543019 | CASP4 | 0.003677598 | CDS  |



|                 |              |       |             |      |
|-----------------|--------------|-------|-------------|------|
| hsa-miR-4692    | XM_011543019 | CASP4 | 0.009163709 | CDS  |
| hsa-miR-4693-3p | XM_011543019 | CASP4 | 7.46E-06    | CDS  |
| hsa-miR-4695-5p | XM_011543019 | CASP4 | 0.00023335  | CDS  |
| hsa-miR-4695-5p | XM_011543019 | CASP4 | 0.000867817 | CDS  |
| hsa-miR-4695-5p | XM_011543019 | CASP4 | 0.005953452 | 3UTR |
| hsa-miR-4697-3p | XM_011543019 | CASP4 | 2.55E-06    | CDS  |
| hsa-miR-4700-5p | XM_011543019 | CASP4 | 0.007685493 | CDS  |
| hsa-miR-4700-3p | XM_011543019 | CASP4 | 2.83E-05    | CDS  |
| hsa-miR-4701-3p | XM_011543019 | CASP4 | 0.000717477 | CDS  |
| hsa-miR-4701-3p | XM_011543019 | CASP4 | 0.004418741 | CDS  |
| hsa-miR-4701-3p | XM_011543019 | CASP4 | 0.5888929   | CDS  |
| hsa-miR-4706    | XM_011543019 | CASP4 | 0.001723097 | CDS  |
| hsa-miR-4706    | XM_011543019 | CASP4 | 0.006369709 | 3UTR |
| hsa-miR-4707-5p | XM_011543019 | CASP4 | 8.39E-06    | CDS  |
| hsa-miR-4707-5p | XM_011543019 | CASP4 | 0.00307967  | CDS  |
| hsa-miR-4708-3p | XM_011543019 | CASP4 | 0.000781748 | CDS  |
| hsa-miR-4709-3p | XM_011543019 | CASP4 | 0.001806281 | CDS  |
| hsa-miR-4710    | XM_011543019 | CASP4 | 0.004667567 | CDS  |
| hsa-miR-4710    | XM_011543019 | CASP4 | 0.000576363 | CDS  |
| hsa-miR-4710    | XM_011543019 | CASP4 | 0.006819084 | 3UTR |
| hsa-miR-4710    | XM_011543019 | CASP4 | 0.004446168 | CDS  |
| hsa-miR-4711-5p | XM_011543019 | CASP4 | 0.000268314 | CDS  |
| hsa-miR-4713-3p | XM_011543019 | CASP4 | 0.002808639 | 5UTR |
| hsa-miR-4714-5p | XM_011543019 | CASP4 | 5.70E-05    | CDS  |
| hsa-miR-4714-3p | XM_011543019 | CASP4 | 9.44E-06    | CDS  |
| hsa-miR-4715-5p | XM_011543019 | CASP4 | 0.000108611 | CDS  |
| hsa-miR-4715-3p | XM_011543019 | CASP4 | 4.32E-05    | CDS  |
| hsa-miR-4715-3p | XM_011543019 | CASP4 | 0.000207738 | 5UTR |
| hsa-miR-3529-5p | XM_011543019 | CASP4 | 0.008220982 | CDS  |
| hsa-miR-4717-5p | XM_011543019 | CASP4 | 0.000781748 | CDS  |
| hsa-miR-4717-3p | XM_011543019 | CASP4 | 0.01093692  | CDS  |
| hsa-miR-4717-3p | XM_011543019 | CASP4 | 0.001853865 | 5UTR |
| hsa-miR-4717-3p | XM_011543019 | CASP4 | 0.00156445  | 5UTR |
| hsa-miR-4718    | XM_011543019 | CASP4 | 0.005470165 | CDS  |
| hsa-miR-4720-5p | XM_011543019 | CASP4 | 0.01194194  | CDS  |
| hsa-miR-4721    | XM_011543019 | CASP4 | 0.004304008 | CDS  |
| hsa-miR-4722-5p | XM_011543019 | CASP4 | 0.005953452 | CDS  |
| hsa-miR-4722-3p | XM_011543019 | CASP4 | 0.002982281 | CDS  |
| hsa-miR-4723-5p | XM_011543019 | CASP4 | 2.14E-05    | CDS  |
| hsa-miR-4723-3p | XM_011543019 | CASP4 | 8.36E-06    | CDS  |
| hsa-miR-4723-3p | XM_011543019 | CASP4 | 0.000386263 | CDS  |
| hsa-miR-4723-3p | XM_011543019 | CASP4 | 0.000525684 | CDS  |
| hsa-miR-4724-3p | XM_011543019 | CASP4 | 0.001765413 | CDS  |
| hsa-miR-4724-3p | XM_011543019 | CASP4 | 0.1494029   | 5UTR |

|                 |              |       |             |      |
|-----------------|--------------|-------|-------------|------|
| hsa-miR-4725-5p | XM_011543019 | CASP4 | 9.12E-06    | CDS  |
| hsa-miR-4725-3p | XM_011543019 | CASP4 | 0.01380666  | 5UTR |
| hsa-miR-4725-3p | XM_011543019 | CASP4 | 0.00215005  | CDS  |
| hsa-miR-4726-5p | XM_011543019 | CASP4 | 0.000781748 | CDS  |
| hsa-miR-4726-5p | XM_011543019 | CASP4 | 0.001122082 | 5UTR |
| hsa-miR-4726-3p | XM_011543019 | CASP4 | 0.000127802 | CDS  |
| hsa-miR-4726-3p | XM_011543019 | CASP4 | 2.02E-05    | CDS  |
| hsa-miR-4727-5p | XM_011543019 | CASP4 | 0.002376413 | CDS  |
| hsa-miR-4728-5p | XM_011543019 | CASP4 | 0.005953452 | 3UTR |
| hsa-miR-4728-5p | XM_011543019 | CASP4 | 0.000723216 | CDS  |
| hsa-miR-4728-3p | XM_011543019 | CASP4 | 2.83E-05    | CDS  |
| hsa-miR-4730    | XM_011543019 | CASP4 | 0.000449296 | CDS  |
| hsa-miR-4730    | XM_011543019 | CASP4 | 0.000127802 | CDS  |
| hsa-miR-4731-5p | XM_011543019 | CASP4 | 2.14E-05    | CDS  |
| hsa-miR-4731-5p | XM_011543019 | CASP4 | 0.005133538 | CDS  |
| hsa-miR-4731-5p | XM_011543019 | CASP4 | 0.157008    | CDS  |
| hsa-miR-4732-3p | XM_011543019 | CASP4 | 0.002877047 | CDS  |
| hsa-miR-4733-5p | XM_011543019 | CASP4 | 1.05E-05    | 5UTR |
| hsa-miR-4733-3p | XM_011543019 | CASP4 | 0.001365539 | 5UTR |
| hsa-miR-4734    | XM_011543019 | CASP4 | 0.000635321 | CDS  |
| hsa-miR-4735-3p | XM_011543019 | CASP4 | 0.000662504 | 3UTR |
| hsa-miR-4736    | XM_011543019 | CASP4 | 2.70E-05    | CDS  |
| hsa-miR-4736    | XM_011543019 | CASP4 | 0.005953452 | 3UTR |
| hsa-miR-4736    | XM_011543019 | CASP4 | 0.005352298 | CDS  |
| hsa-miR-4737    | XM_011543019 | CASP4 | 0.000234425 | CDS  |
| hsa-miR-3064-5p | XM_011543019 | CASP4 | 0.01923861  | 3UTR |
| hsa-miR-3064-5p | XM_011543019 | CASP4 | 0.000189105 | CDS  |
| hsa-miR-3064-5p | XM_011543019 | CASP4 | 0.000616808 | CDS  |
| hsa-miR-3064-3p | XM_011543019 | CASP4 | 0.001495267 | 5UTR |
| hsa-miR-4738-3p | XM_011543019 | CASP4 | 1.81E-05    | CDS  |
| hsa-miR-4738-3p | XM_011543019 | CASP4 | 0.000837243 | 5UTR |
| hsa-miR-4739    | XM_011543019 | CASP4 | 0.001351419 | CDS  |
| hsa-miR-4739    | XM_011543019 | CASP4 | 0.000689104 | 3UTR |
| hsa-miR-4739    | XM_011543019 | CASP4 | 0.000592024 | CDS  |
| hsa-miR-4740-3p | XM_011543019 | CASP4 | 0.001122082 | 5UTR |
| hsa-miR-4741    | XM_011543019 | CASP4 | 0.002303406 | CDS  |
| hsa-miR-4743-5p | XM_011543019 | CASP4 | 4.34E-05    | CDS  |
| hsa-miR-4743-5p | XM_011543019 | CASP4 | 0.000723216 | CDS  |
| hsa-miR-4743-5p | XM_011543019 | CASP4 | 0.000381243 | 5UTR |
| hsa-miR-4743-3p | XM_011543019 | CASP4 | 0.000957196 | CDS  |
| hsa-miR-4745-5p | XM_011543019 | CASP4 | 0.07838235  | CDS  |
| hsa-miR-4745-3p | XM_011543019 | CASP4 | 6.22E-06    | CDS  |
| hsa-miR-4746-5p | XM_011543019 | CASP4 | 0.000983833 | 5UTR |
| hsa-miR-4746-3p | XM_011543019 | CASP4 | 0.000109679 | CDS  |

|                  |              |       |             |      |
|------------------|--------------|-------|-------------|------|
| hsa-miR-4746-3p  | XM_011543019 | CASP4 | 0.000652818 | 3UTR |
| hsa-miR-4747-5p  | XM_011543019 | CASP4 | 0.01380666  | 5UTR |
| hsa-miR-4747-5p  | XM_011543019 | CASP4 | 0.000867817 | CDS  |
| hsa-miR-4747-3p  | XM_011543019 | CASP4 | 0.001122082 | 5UTR |
| hsa-miR-4748     | XM_011543019 | CASP4 | 0.1147698   | 5UTR |
| hsa-miR-4748     | XM_011543019 | CASP4 | 0.00080334  | CDS  |
| hsa-miR-4748     | XM_011543019 | CASP4 | 0.003396159 | CDS  |
| hsa-miR-4749-5p  | XM_011543019 | CASP4 | 0.001723097 | CDS  |
| hsa-miR-4750-5p  | XM_011543019 | CASP4 | 0.000604446 | CDS  |
| hsa-miR-4750-5p  | XM_011543019 | CASP4 | 0.009826038 | CDS  |
| hsa-miR-4750-3p  | XM_011543019 | CASP4 | 1.38E-05    | CDS  |
| hsa-miR-4751     | XM_011543019 | CASP4 | 0.000141499 | CDS  |
| hsa-miR-4751     | XM_011543019 | CASP4 | 8.44E-05    | CDS  |
| hsa-miR-4752     | XM_011543019 | CASP4 | 0.000127802 | CDS  |
| hsa-miR-371b-5p  | XM_011543019 | CASP4 | 1.47E-05    | CDS  |
| hsa-miR-371b-3p  | XM_011543019 | CASP4 | 0.001142641 | 5UTR |
| hsa-miR-4754     | XM_011543019 | CASP4 | 2.20E-05    | CDS  |
| hsa-miR-4755-5p  | XM_011543019 | CASP4 | 2.12E-05    | CDS  |
| hsa-miR-4755-5p  | XM_011543019 | CASP4 | 8.36E-06    | CDS  |
| hsa-miR-4755-3p  | XM_011543019 | CASP4 | 0.00293118  | CDS  |
| hsa-miR-4755-3p  | XM_011543019 | CASP4 | 0.002517568 | CDS  |
| hsa-miR-499b-5p  | XM_011543019 | CASP4 | 0.00124429  | CDS  |
| hsa-miR-4756-5p  | XM_011543019 | CASP4 | 0.000155666 | CDS  |
| hsa-miR-4756-5p  | XM_011543019 | CASP4 | 0.000604446 | CDS  |
| hsa-miR-4756-3p  | XM_011543019 | CASP4 | 0.000587308 | 5UTR |
| hsa-miR-4757-5p  | XM_011543019 | CASP4 | 0.001412567 | 5UTR |
| hsa-miR-4758-5p  | XM_011543019 | CASP4 | 0.006073437 | CDS  |
| hsa-miR-4758-5p  | XM_011543019 | CASP4 | 0.0166645   | 3UTR |
| hsa-miR-4758-3p  | XM_011543019 | CASP4 | 9.07E-06    | CDS  |
| hsa-miR-4761-3p  | XM_011543019 | CASP4 | 3.18E-05    | 5UTR |
| hsa-miR-4761-3p  | XM_011543019 | CASP4 | 0.01778475  | CDS  |
| hsa-miR-4763-3p  | XM_011543019 | CASP4 | 0.005953452 | CDS  |
| hsa-miR-4763-3p  | XM_011543019 | CASP4 | 0.00104551  | CDS  |
| hsa-miR-4767     | XM_011543019 | CASP4 | 0.01778475  | CDS  |
| hsa-miR-4767     | XM_011543019 | CASP4 | 0.0218458   | 3UTR |
| hsa-miR-4768-5p  | XM_011543019 | CASP4 | 3.16E-05    | CDS  |
| hsa-miR-4769-3p  | XM_011543019 | CASP4 | 0.01917344  | 5UTR |
| hsa-miR-4769-3p  | XM_011543019 | CASP4 | 0.000155947 | CDS  |
| hsa-miR-4776-5p  | XM_011543019 | CASP4 | 0.00011745  | CDS  |
| hsa-miR-4778-3p  | XM_011543019 | CASP4 | 0.3628757   | 5UTR |
| hsa-miR-4780     | XM_011543019 | CASP4 | 8.36E-06    | CDS  |
| hsa-miR-4780     | XM_011543019 | CASP4 | 0.000188063 | CDS  |
| hsa-miR-4436b-5p | XM_011543019 | CASP4 | 6.19E-05    | CDS  |
| hsa-miR-4436b-3p | XM_011543019 | CASP4 | 0.002698706 | CDS  |

|                  |              |       |             |      |
|------------------|--------------|-------|-------------|------|
| hsa-miR-4436b-3p | XM_011543019 | CASP4 | 0.02649501  | 5UTR |
| hsa-miR-4781-5p  | XM_011543019 | CASP4 | 0.000383308 | 5UTR |
| hsa-miR-4783-3p  | XM_011543019 | CASP4 | 0.01052851  | CDS  |
| hsa-miR-4784     | XM_011543019 | CASP4 | 0.006276804 | 3UTR |
| hsa-miR-4784     | XM_011543019 | CASP4 | 0.000218895 | CDS  |
| hsa-miR-1245b-3p | XM_011543019 | CASP4 | 0.000200147 | CDS  |
| hsa-miR-2467-5p  | XM_011543019 | CASP4 | 0.002728573 | CDS  |
| hsa-miR-2467-5p  | XM_011543019 | CASP4 | 3.27E-05    | 5UTR |
| hsa-miR-2467-3p  | XM_011543019 | CASP4 | 0.001057457 | CDS  |
| hsa-miR-2467-3p  | XM_011543019 | CASP4 | 0.000678839 | 5UTR |
| hsa-miR-4786-5p  | XM_011543019 | CASP4 | 0.004304008 | CDS  |
| hsa-miR-4786-3p  | XM_011543019 | CASP4 | 0.01128548  | CDS  |
| hsa-miR-4786-3p  | XM_011543019 | CASP4 | 4.82E-05    | CDS  |
| hsa-miR-4787-5p  | XM_011543019 | CASP4 | 2.56E-05    | CDS  |
| hsa-miR-4787-5p  | XM_011543019 | CASP4 | 0.005208109 | 3UTR |
| hsa-miR-4791     | XM_011543019 | CASP4 | 6.04E-05    | CDS  |
| hsa-miR-4793-5p  | XM_011543019 | CASP4 | 0.002186513 | CDS  |
| hsa-miR-4793-3p  | XM_011543019 | CASP4 | 0.000706898 | CDS  |
| hsa-miR-4797-5p  | XM_011543019 | CASP4 | 0.000316826 | CDS  |
| hsa-miR-4797-5p  | XM_011543019 | CASP4 | 0.002487907 | CDS  |
| hsa-miR-5000-5p  | XM_011543019 | CASP4 | 0.1168332   | 5UTR |
| hsa-miR-5001-5p  | XM_011543019 | CASP4 | 0.01350715  | CDS  |
| hsa-miR-5001-3p  | XM_011543019 | CASP4 | 0.01221606  | 5UTR |
| hsa-miR-5002-3p  | XM_011543019 | CASP4 | 0.001338793 | 5UTR |
| hsa-miR-5003-3p  | XM_011543019 | CASP4 | 0.01114662  | CDS  |
| hsa-miR-5004-5p  | XM_011543019 | CASP4 | 0.002726335 | CDS  |
| hsa-miR-5004-5p  | XM_011543019 | CASP4 | 0.001057457 | CDS  |
| hsa-miR-5004-3p  | XM_011543019 | CASP4 | 0.00079746  | 5UTR |
| hsa-miR-5006-5p  | XM_011543019 | CASP4 | 0.012822    | CDS  |
| hsa-miR-5007-5p  | XM_011543019 | CASP4 | 0.000709764 | 5UTR |
| hsa-miR-5008-5p  | XM_011543019 | CASP4 | 0.00438586  | CDS  |
| hsa-miR-5008-5p  | XM_011543019 | CASP4 | 0.00080334  | CDS  |
| hsa-miR-5008-3p  | XM_011543019 | CASP4 | 5.70E-05    | CDS  |
| hsa-miR-5008-3p  | XM_011543019 | CASP4 | 7.76E-07    | CDS  |
| hsa-miR-5009-5p  | XM_011543019 | CASP4 | 4.48E-05    | CDS  |
| hsa-miR-5010-5p  | XM_011543019 | CASP4 | 4.12E-05    | 5UTR |
| hsa-miR-5010-5p  | XM_011543019 | CASP4 | 0.00104551  | CDS  |
| hsa-miR-5011-3p  | XM_011543019 | CASP4 | 0.1867544   | 3UTR |
| hsa-miR-5047     | XM_011543019 | CASP4 | 0.153048    | CDS  |
| hsa-miR-5087     | XM_011543019 | CASP4 | 0.000169899 | CDS  |
| hsa-miR-5088-5p  | XM_011543019 | CASP4 | 0.006650816 | CDS  |
| hsa-miR-5088-5p  | XM_011543019 | CASP4 | 0.02617972  | CDS  |
| hsa-miR-5088-5p  | XM_011543019 | CASP4 | 0.004702132 | 5UTR |
| hsa-miR-5088-3p  | XM_011543019 | CASP4 | 0.002311532 | CDS  |

|                  |              |       |             |      |
|------------------|--------------|-------|-------------|------|
| hsa-miR-5088-3p  | XM_011543019 | CASP4 | 0.005475725 | CDS  |
| hsa-miR-5089-5p  | XM_011543019 | CASP4 | 0.05984624  | CDS  |
| hsa-miR-5090     | XM_011543019 | CASP4 | 0.000606734 | CDS  |
| hsa-miR-5090     | XM_011543019 | CASP4 | 4.84E-05    | CDS  |
| hsa-miR-5091     | XM_011543019 | CASP4 | 0.001160472 | CDS  |
| hsa-miR-5093     | XM_011543019 | CASP4 | 0.005953452 | CDS  |
| hsa-miR-5189-5p  | XM_011543019 | CASP4 | 0.000526877 | CDS  |
| hsa-miR-5189-5p  | XM_011543019 | CASP4 | 0.03238601  | CDS  |
| hsa-miR-5190     | XM_011543019 | CASP4 | 0.2935726   | CDS  |
| hsa-miR-5192     | XM_011543019 | CASP4 | 0.002811797 | CDS  |
| hsa-miR-5192     | XM_011543019 | CASP4 | 0.001560807 | CDS  |
| hsa-miR-5192     | XM_011543019 | CASP4 | 0.000933598 | 5UTR |
| hsa-miR-5193     | XM_011543019 | CASP4 | 0.002870221 | CDS  |
| hsa-miR-5195-3p  | XM_011543019 | CASP4 | 0.002228703 | CDS  |
| hsa-miR-5195-3p  | XM_011543019 | CASP4 | 0.01114662  | CDS  |
| hsa-miR-5196-5p  | XM_011543019 | CASP4 | 0.04098359  | 3UTR |
| hsa-miR-5196-5p  | XM_011543019 | CASP4 | 0.003393045 | CDS  |
| hsa-miR-4524b-5p | XM_011543019 | CASP4 | 0.006381234 | CDS  |
| hsa-miR-5571-3p  | XM_011543019 | CASP4 | 0.000152911 | 5UTR |
| hsa-miR-5100     | XM_011543019 | CASP4 | 0.000325446 | CDS  |
| hsa-miR-5100     | XM_011543019 | CASP4 | 0.000492618 | CDS  |
| hsa-miR-5100     | XM_011543019 | CASP4 | 0.000137537 | CDS  |
| hsa-miR-5572     | XM_011543019 | CASP4 | 0.001645588 | 5UTR |
| hsa-miR-5572     | XM_011543019 | CASP4 | 0.000844485 | CDS  |
| hsa-miR-5572     | XM_011543019 | CASP4 | 0.003070085 | 5UTR |
| hsa-miR-664b-5p  | XM_011543019 | CASP4 | 0.006819084 | 3UTR |
| hsa-miR-5580-5p  | XM_011543019 | CASP4 | 0.01082276  | CDS  |
| hsa-miR-5580-3p  | XM_011543019 | CASP4 | 0.01004367  | CDS  |
| hsa-miR-5581-5p  | XM_011543019 | CASP4 | 9.79E-05    | CDS  |
| hsa-miR-5581-5p  | XM_011543019 | CASP4 | 0.000725653 | CDS  |
| hsa-miR-5581-3p  | XM_011543019 | CASP4 | 0.002870221 | CDS  |
| hsa-miR-5581-3p  | XM_011543019 | CASP4 | 0.000927185 | CDS  |
| hsa-miR-5582-3p  | XM_011543019 | CASP4 | 0.000437056 | 5UTR |
| hsa-miR-5587-5p  | XM_011543019 | CASP4 | 4.20E-05    | CDS  |
| hsa-miR-5587-3p  | XM_011543019 | CASP4 | 0.00307967  | CDS  |
| hsa-miR-5587-3p  | XM_011543019 | CASP4 | 0.003677598 | CDS  |
| hsa-miR-1295b-3p | XM_011543019 | CASP4 | 0.000781748 | CDS  |
| hsa-miR-5589-5p  | XM_011543019 | CASP4 | 0.006538049 | CDS  |
| hsa-miR-5589-5p  | XM_011543019 | CASP4 | 0.000314076 | CDS  |
| hsa-miR-5591-5p  | XM_011543019 | CASP4 | 0.004304008 | CDS  |
| hsa-miR-5681a    | XM_011543019 | CASP4 | 2.56E-05    | CDS  |
| hsa-miR-5682     | XM_011543019 | CASP4 | 4.82E-05    | CDS  |
| hsa-miR-5683     | XM_011543019 | CASP4 | 0.000400512 | CDS  |
| hsa-miR-548ax    | XM_011543019 | CASP4 | 0.009215077 | 5UTR |

|                 |              |       |             |      |
|-----------------|--------------|-------|-------------|------|
| hsa-miR-5685    | XM_011543019 | CASP4 | 2.02E-05    | CDS  |
| hsa-miR-5687    | XM_011543019 | CASP4 | 0.002398508 | 5UTR |
| hsa-miR-5689    | XM_011543019 | CASP4 | 0.001972543 | CDS  |
| hsa-miR-5697    | XM_011543019 | CASP4 | 0.000505501 | CDS  |
| hsa-miR-5698    | XM_011543019 | CASP4 | 1.53E-05    | 5UTR |
| hsa-miR-5702    | XM_011543019 | CASP4 | 0.000108611 | CDS  |
| hsa-miR-5704    | XM_011543019 | CASP4 | 0.000797533 | CDS  |
| hsa-miR-5705    | XM_011543019 | CASP4 | 5.86E-05    | CDS  |
| hsa-miR-5705    | XM_011543019 | CASP4 | 0.002289318 | 5UTR |
| hsa-miR-5787    | XM_011543019 | CASP4 | 0.006819084 | 3UTR |
| hsa-miR-5787    | XM_011543019 | CASP4 | 0.006733282 | CDS  |
| hsa-miR-5787    | XM_011543019 | CASP4 | 5.42E-05    | CDS  |
| hsa-miR-1199-5p | XM_011543019 | CASP4 | 0.003273847 | 5UTR |
| hsa-miR-6068    | XM_011543019 | CASP4 | 2.27E-05    | CDS  |
| hsa-miR-6069    | XM_011543019 | CASP4 | 0.006819084 | 3UTR |
| hsa-miR-6069    | XM_011543019 | CASP4 | 1.04E-05    | CDS  |
| hsa-miR-6070    | XM_011543019 | CASP4 | 0.002228703 | CDS  |
| hsa-miR-6070    | XM_011543019 | CASP4 | 0.002728573 | CDS  |
| hsa-miR-6070    | XM_011543019 | CASP4 | 0.01017319  | CDS  |
| hsa-miR-6073    | XM_011543019 | CASP4 | 0.000427688 | CDS  |
| hsa-miR-6074    | XM_011543019 | CASP4 | 0.000604446 | CDS  |
| hsa-miR-6075    | XM_011543019 | CASP4 | 0.001122082 | 5UTR |
| hsa-miR-6075    | XM_011543019 | CASP4 | 0.002517568 | CDS  |
| hsa-miR-6076    | XM_011543019 | CASP4 | 0.002303406 | CDS  |
| hsa-miR-6077    | XM_011543019 | CASP4 | 0.001396956 | 5UTR |
| hsa-miR-6081    | XM_011543019 | CASP4 | 0.000427688 | CDS  |
| hsa-miR-6081    | XM_011543019 | CASP4 | 0.009215077 | 5UTR |
| hsa-miR-6081    | XM_011543019 | CASP4 | 0.000768445 | CDS  |
| hsa-miR-6084    | XM_011543019 | CASP4 | 0.002160358 | 5UTR |
| hsa-miR-6085    | XM_011543019 | CASP4 | 0.005598497 | CDS  |
| hsa-miR-6085    | XM_011543019 | CASP4 | 0.004834525 | 5UTR |
| hsa-miR-6086    | XM_011543019 | CASP4 | 0.000994897 | 5UTR |
| hsa-miR-6086    | XM_011543019 | CASP4 | 0.005060872 | CDS  |
| hsa-miR-6088    | XM_011543019 | CASP4 | 0.001723097 | CDS  |
| hsa-miR-6088    | XM_011543019 | CASP4 | 0.000178408 | CDS  |
| hsa-miR-6090    | XM_011543019 | CASP4 | 0.002868814 | CDS  |
| hsa-miR-6090    | XM_011543019 | CASP4 | 0.001723097 | CDS  |
| hsa-miR-6124    | XM_011543019 | CASP4 | 0.002284785 | CDS  |
| hsa-miR-6125    | XM_011543019 | CASP4 | 0.000606734 | CDS  |
| hsa-miR-6125    | XM_011543019 | CASP4 | 0.008220982 | CDS  |
| hsa-miR-6127    | XM_011543019 | CASP4 | 0.006369709 | 3UTR |
| hsa-miR-6129    | XM_011543019 | CASP4 | 0.005133538 | CDS  |
| hsa-miR-6129    | XM_011543019 | CASP4 | 0.01506736  | CDS  |
| hsa-miR-6131    | XM_011543019 | CASP4 | 0.001229686 | CDS  |

|                  |              |       |             |      |
|------------------|--------------|-------|-------------|------|
| hsa-miR-6132     | XM_011543019 | CASP4 | 0.005953452 | 3UTR |
| hsa-miR-6132     | XM_011543019 | CASP4 | 2.70E-05    | CDS  |
| hsa-miR-6133     | XM_011543019 | CASP4 | 0.000690717 | 3UTR |
| hsa-miR-6134     | XM_011543019 | CASP4 | 2.56E-05    | CDS  |
| hsa-miR-6499-3p  | XM_011543019 | CASP4 | 0.009215077 | 5UTR |
| hsa-miR-548ay-5p | XM_011543019 | CASP4 | 0.03571082  | 5UTR |
| hsa-miR-6500-5p  | XM_011543019 | CASP4 | 0.00011745  | CDS  |
| hsa-miR-6500-5p  | XM_011543019 | CASP4 | 0.01350715  | CDS  |
| hsa-miR-548az-5p | XM_011543019 | CASP4 | 0.03571082  | 5UTR |
| hsa-miR-6501-5p  | XM_011543019 | CASP4 | 0.0023921   | 5UTR |
| hsa-miR-6501-5p  | XM_011543019 | CASP4 | 0.0218458   | 3UTR |
| hsa-miR-6503-3p  | XM_011543019 | CASP4 | 0.000248963 | CDS  |
| hsa-miR-6506-5p  | XM_011543019 | CASP4 | 2.14E-05    | CDS  |
| hsa-miR-6507-3p  | XM_011543019 | CASP4 | 0.000203446 | CDS  |
| hsa-miR-6508-5p  | XM_011543019 | CASP4 | 0.000709764 | 5UTR |
| hsa-miR-6508-5p  | XM_011543019 | CASP4 | 0.000234425 | CDS  |
| hsa-miR-6510-5p  | XM_011543019 | CASP4 | 0.000717952 | 5UTR |
| hsa-miR-6510-5p  | XM_011543019 | CASP4 | 0.001680409 | CDS  |
| hsa-miR-6513-5p  | XM_011543019 | CASP4 | 0.002808639 | 5UTR |
| hsa-miR-6514-5p  | XM_011543019 | CASP4 | 0.001464062 | CDS  |
| hsa-miR-6515-5p  | XM_011543019 | CASP4 | 0.005060872 | 3UTR |
| hsa-miR-6715a-3p | XM_011543019 | CASP4 | 0.001474321 | CDS  |
| hsa-miR-6716-5p  | XM_011543019 | CASP4 | 2.73E-05    | 5UTR |
| hsa-miR-6716-3p  | XM_011543019 | CASP4 | 0.000203446 | CDS  |
| hsa-miR-6717-5p  | XM_011543019 | CASP4 | 0.01076079  | CDS  |
| hsa-miR-6717-5p  | XM_011543019 | CASP4 | 0.000592024 | CDS  |
| hsa-miR-6511b-5p | XM_011543019 | CASP4 | 1.81E-05    | CDS  |
| hsa-miR-6511b-3p | XM_011543019 | CASP4 | 0.000425086 | 5UTR |
| hsa-miR-6511b-3p | XM_011543019 | CASP4 | 2.55E-06    | CDS  |
| hsa-miR-6718-5p  | XM_011543019 | CASP4 | 0.002095427 | CDS  |
| hsa-miR-6719-3p  | XM_011543019 | CASP4 | 0.01864605  | CDS  |
| hsa-miR-6720-5p  | XM_011543019 | CASP4 | 0.002870221 | CDS  |
| hsa-miR-6720-3p  | XM_011543019 | CASP4 | 4.82E-05    | CDS  |
| hsa-miR-6720-3p  | XM_011543019 | CASP4 | 0.004834525 | 5UTR |
| hsa-miR-6721-5p  | XM_011543019 | CASP4 | 0.006819084 | CDS  |
| hsa-miR-6721-5p  | XM_011543019 | CASP4 | 0.003070085 | 5UTR |
| hsa-miR-6722-3p  | XM_011543019 | CASP4 | 0.000616808 | CDS  |
| hsa-miR-6722-3p  | XM_011543019 | CASP4 | 0.001586598 | CDS  |
| hsa-miR-6724-5p  | XM_011543019 | CASP4 | 0.000836616 | CDS  |
| hsa-miR-6726-5p  | XM_011543019 | CASP4 | 0.002868814 | CDS  |
| hsa-miR-6726-5p  | XM_011543019 | CASP4 | 0.000353171 | CDS  |
| hsa-miR-6726-5p  | XM_011543019 | CASP4 | 0.000864707 | 5UTR |
| hsa-miR-6727-5p  | XM_011543019 | CASP4 | 0.000604446 | CDS  |
| hsa-miR-6727-5p  | XM_011543019 | CASP4 | 0.1524418   | CDS  |

|                 |              |       |             |      |
|-----------------|--------------|-------|-------------|------|
| hsa-miR-6728-5p | XM_011543019 | CASP4 | 5.52E-05    | CDS  |
| hsa-miR-6729-5p | XM_011543019 | CASP4 | 0.006276804 | 3UTR |
| hsa-miR-6731-5p | XM_011543019 | CASP4 | 0.000864707 | 5UTR |
| hsa-miR-6731-5p | XM_011543019 | CASP4 | 0.005953452 | 3UTR |
| hsa-miR-6731-5p | XM_011543019 | CASP4 | 0.005133538 | CDS  |
| hsa-miR-6731-5p | XM_011543019 | CASP4 | 0.000576363 | CDS  |
| hsa-miR-6732-5p | XM_011543019 | CASP4 | 0.006276804 | CDS  |
| hsa-miR-6732-3p | XM_011543019 | CASP4 | 0.001338793 | 5UTR |
| hsa-miR-6733-5p | XM_011543019 | CASP4 | 0.01380666  | 5UTR |
| hsa-miR-6734-5p | XM_011543019 | CASP4 | 0.012822    | CDS  |
| hsa-miR-6735-5p | XM_011543019 | CASP4 | 0.002698706 | CDS  |
| hsa-miR-6735-3p | XM_011543019 | CASP4 | 0.000141499 | CDS  |
| hsa-miR-6736-5p | XM_011543019 | CASP4 | 0.002726335 | CDS  |
| hsa-miR-6736-3p | XM_011543019 | CASP4 | 0.01017319  | CDS  |
| hsa-miR-6736-3p | XM_011543019 | CASP4 | 0.00013726  | CDS  |
| hsa-miR-6737-5p | XM_011543019 | CASP4 | 0.008948377 | CDS  |
| hsa-miR-6737-5p | XM_011543019 | CASP4 | 0.000306861 | CDS  |
| hsa-miR-6738-5p | XM_011543019 | CASP4 | 0.000592024 | CDS  |
| hsa-miR-6739-5p | XM_011543019 | CASP4 | 0.002284785 | CDS  |
| hsa-miR-6741-5p | XM_011543019 | CASP4 | 0.01298236  | 3UTR |
| hsa-miR-6741-5p | XM_011543019 | CASP4 | 0.04209539  | CDS  |
| hsa-miR-6741-5p | XM_011543019 | CASP4 | 0.000433683 | CDS  |
| hsa-miR-6741-3p | XM_011543019 | CASP4 | 0.00013726  | CDS  |
| hsa-miR-6742-5p | XM_011543019 | CASP4 | 0.000411097 | 5UTR |
| hsa-miR-6742-5p | XM_011543019 | CASP4 | 0.002442208 | 5UTR |
| hsa-miR-6742-3p | XM_011543019 | CASP4 | 0.001735767 | CDS  |
| hsa-miR-6743-5p | XM_011543019 | CASP4 | 3.43E-05    | CDS  |
| hsa-miR-6743-5p | XM_011543019 | CASP4 | 0.005598497 | 3UTR |
| hsa-miR-6743-5p | XM_011543019 | CASP4 | 0.01350715  | CDS  |
| hsa-miR-6743-5p | XM_011543019 | CASP4 | 0.008948377 | CDS  |
| hsa-miR-6743-3p | XM_011543019 | CASP4 | 0.000725653 | CDS  |
| hsa-miR-6744-5p | XM_011543019 | CASP4 | 0.000178408 | CDS  |
| hsa-miR-6745    | XM_011543019 | CASP4 | 0.2527227   | 5UTR |
| hsa-miR-6746-5p | XM_011543019 | CASP4 | 0.001702817 | CDS  |
| hsa-miR-6746-3p | XM_011543019 | CASP4 | 0.007399047 | CDS  |
| hsa-miR-6747-5p | XM_011543019 | CASP4 | 0.000994897 | 5UTR |
| hsa-miR-6747-5p | XM_011543019 | CASP4 | 0.004834525 | 5UTR |
| hsa-miR-6748-3p | XM_011543019 | CASP4 | 0.000585775 | CDS  |
| hsa-miR-6749-5p | XM_011543019 | CASP4 | 0.000927185 | 5UTR |
| hsa-miR-6749-5p | XM_011543019 | CASP4 | 0.006819084 | CDS  |
| hsa-miR-6749-3p | XM_011543019 | CASP4 | 0.001338793 | 5UTR |
| hsa-miR-6751-5p | XM_011543019 | CASP4 | 0.002726335 | CDS  |
| hsa-miR-6751-5p | XM_011543019 | CASP4 | 0.004304008 | CDS  |
| hsa-miR-6751-3p | XM_011543019 | CASP4 | 0.007669794 | CDS  |



|                  |              |       |             |      |
|------------------|--------------|-------|-------------|------|
| hsa-miR-6752-5p  | XM_011543019 | CASP4 | 0.005060872 | CDS  |
| hsa-miR-6753-5p  | XM_011543019 | CASP4 | 0.002709686 | CDS  |
| hsa-miR-6753-3p  | XM_011543019 | CASP4 | 0.00027619  | CDS  |
| hsa-miR-6753-3p  | XM_011543019 | CASP4 | 0.000205996 | CDS  |
| hsa-miR-6753-3p  | XM_011543019 | CASP4 | 2.79E-05    | CDS  |
| hsa-miR-6754-5p  | XM_011543019 | CASP4 | 0.001351419 | CDS  |
| hsa-miR-6754-5p  | XM_011543019 | CASP4 | 0.04398309  | CDS  |
| hsa-miR-6754-3p  | XM_011543019 | CASP4 | 0.003175839 | CDS  |
| hsa-miR-6754-3p  | XM_011543019 | CASP4 | 0.001338793 | 5UTR |
| hsa-miR-6756-5p  | XM_011543019 | CASP4 | 0.005598497 | CDS  |
| hsa-miR-6756-5p  | XM_011543019 | CASP4 | 0.01469811  | CDS  |
| hsa-miR-6756-3p  | XM_011543019 | CASP4 | 0.008718099 | CDS  |
| hsa-miR-6757-5p  | XM_011543019 | CASP4 | 0.005598497 | CDS  |
| hsa-miR-6757-5p  | XM_011543019 | CASP4 | 0.004667567 | CDS  |
| hsa-miR-6757-5p  | XM_011543019 | CASP4 | 0.001396956 | 5UTR |
| hsa-miR-6758-5p  | XM_011543019 | CASP4 | 0.2188127   | CDS  |
| hsa-miR-6758-5p  | XM_011543019 | CASP4 | 0.004667567 | CDS  |
| hsa-miR-6759-5p  | XM_011543019 | CASP4 | 0.001586598 | CDS  |
| hsa-miR-6759-5p  | XM_011543019 | CASP4 | 0.004753074 | CDS  |
| hsa-miR-6760-5p  | XM_011543019 | CASP4 | 0.001680409 | CDS  |
| hsa-miR-6761-5p  | XM_011543019 | CASP4 | 2.11E-05    | CDS  |
| hsa-miR-6761-5p  | XM_011543019 | CASP4 | 0.002472701 | CDS  |
| hsa-miR-6762-5p  | XM_011543019 | CASP4 | 0.000152911 | 5UTR |
| hsa-miR-6762-3p  | XM_011543019 | CASP4 | 0.009503041 | 3UTR |
| hsa-miR-6762-3p  | XM_011543019 | CASP4 | 0.000723658 | CDS  |
| hsa-miR-6763-5p  | XM_011543019 | CASP4 | 0.006276804 | CDS  |
| hsa-miR-6763-5p  | XM_011543019 | CASP4 | 0.000172777 | CDS  |
| hsa-miR-6763-3p  | XM_011543019 | CASP4 | 0.003175839 | CDS  |
| hsa-miR-6764-5p  | XM_011543019 | CASP4 | 0.000234425 | CDS  |
| hsa-miR-6764-5p  | XM_011543019 | CASP4 | 0.00307967  | CDS  |
| hsa-miR-6765-5p  | XM_011543019 | CASP4 | 0.000867817 | CDS  |
| hsa-miR-6765-5p  | XM_011543019 | CASP4 | 0.002698878 | CDS  |
| hsa-miR-6765-5p  | XM_011543019 | CASP4 | 1.71E-05    | CDS  |
| hsa-miR-6765-3p  | XM_011543019 | CASP4 | 0.001140635 | CDS  |
| hsa-miR-6766-5p  | XM_011543019 | CASP4 | 0.000864707 | 5UTR |
| hsa-miR-6767-5p  | XM_011543019 | CASP4 | 0.000127802 | CDS  |
| hsa-miR-6767-3p  | XM_011543019 | CASP4 | 0.000148476 | 5UTR |
| hsa-miR-6768-3p  | XM_011543019 | CASP4 | 0.000781748 | CDS  |
| hsa-miR-6769a-5p | XM_011543019 | CASP4 | 0.01469811  | CDS  |
| hsa-miR-6769a-5p | XM_011543019 | CASP4 | 0.4499833   | CDS  |
| hsa-miR-6769a-3p | XM_011543019 | CASP4 | 0.007669794 | CDS  |
| hsa-miR-6770-3p  | XM_011543019 | CASP4 | 0.000836616 | CDS  |
| hsa-miR-6771-5p  | XM_011543019 | CASP4 | 0.000604446 | CDS  |
| hsa-miR-6771-5p  | XM_011543019 | CASP4 | 0.005953452 | CDS  |

|                  |              |       |             |      |
|------------------|--------------|-------|-------------|------|
| hsa-miR-6772-5p  | XM_011543019 | CASP4 | 0.000661315 | CDS  |
| hsa-miR-6772-3p  | XM_011543019 | CASP4 | 9.07E-06    | CDS  |
| hsa-miR-6772-3p  | XM_011543019 | CASP4 | 0.000957196 | CDS  |
| hsa-miR-6772-3p  | XM_011543019 | CASP4 | 0.001338793 | 5UTR |
| hsa-miR-6773-5p  | XM_011543019 | CASP4 | 0.003070085 | 5UTR |
| hsa-miR-6773-5p  | XM_011543019 | CASP4 | 0.001122082 | 5UTR |
| hsa-miR-6773-3p  | XM_011543019 | CASP4 | 0.000725653 | CDS  |
| hsa-miR-6774-5p  | XM_011543019 | CASP4 | 0.000604446 | CDS  |
| hsa-miR-6774-5p  | XM_011543019 | CASP4 | 0.01093692  | CDS  |
| hsa-miR-6774-5p  | XM_011543019 | CASP4 | 3.30E-05    | CDS  |
| hsa-miR-6775-5p  | XM_011543019 | CASP4 | 0.005598497 | CDS  |
| hsa-miR-6775-5p  | XM_011543019 | CASP4 | 0.005156117 | CDS  |
| hsa-miR-6775-5p  | XM_011543019 | CASP4 | 0.000844485 | CDS  |
| hsa-miR-6775-3p  | XM_011543019 | CASP4 | 9.12E-06    | CDS  |
| hsa-miR-6776-5p  | XM_011543019 | CASP4 | 0.009055737 | CDS  |
| hsa-miR-6776-5p  | XM_011543019 | CASP4 | 0.1448444   | CDS  |
| hsa-miR-6777-5p  | XM_011543019 | CASP4 | 0.002868814 | CDS  |
| hsa-miR-6778-5p  | XM_011543019 | CASP4 | 0.003193467 | CDS  |
| hsa-miR-6778-5p  | XM_011543019 | CASP4 | 0.000844485 | CDS  |
| hsa-miR-6779-5p  | XM_011543019 | CASP4 | 0.005953452 | 3UTR |
| hsa-miR-6780a-5p | XM_011543019 | CASP4 | 0.00023617  | CDS  |
| hsa-miR-6780a-5p | XM_011543019 | CASP4 | 0.005953452 | 3UTR |
| hsa-miR-6781-5p  | XM_011543019 | CASP4 | 0.001560807 | CDS  |
| hsa-miR-6781-5p  | XM_011543019 | CASP4 | 0.000781748 | CDS  |
| hsa-miR-6781-3p  | XM_011543019 | CASP4 | 0.007719451 | 5UTR |
| hsa-miR-6782-5p  | XM_011543019 | CASP4 | 0.005598497 | CDS  |
| hsa-miR-6782-5p  | XM_011543019 | CASP4 | 0.004667567 | CDS  |
| hsa-miR-6782-5p  | XM_011543019 | CASP4 | 0.001117349 | CDS  |
| hsa-miR-6782-3p  | XM_011543019 | CASP4 | 0.001455093 | 5UTR |
| hsa-miR-6783-5p  | XM_011543019 | CASP4 | 3.18E-05    | 5UTR |
| hsa-miR-6783-5p  | XM_011543019 | CASP4 | 7.63E-06    | CDS  |
| hsa-miR-6784-5p  | XM_011543019 | CASP4 | 0.000837243 | 5UTR |
| hsa-miR-6785-5p  | XM_011543019 | CASP4 | 2.70E-05    | CDS  |
| hsa-miR-6785-5p  | XM_011543019 | CASP4 | 0.005953452 | 3UTR |
| hsa-miR-6785-5p  | XM_011543019 | CASP4 | 0.1546664   | CDS  |
| hsa-miR-6785-5p  | XM_011543019 | CASP4 | 0.004304008 | CDS  |
| hsa-miR-6786-5p  | XM_011543019 | CASP4 | 0.02503297  | CDS  |
| hsa-miR-6787-5p  | XM_011543019 | CASP4 | 0.001229686 | CDS  |
| hsa-miR-6787-3p  | XM_011543019 | CASP4 | 0.000293966 | CDS  |
| hsa-miR-6787-3p  | XM_011543019 | CASP4 | 2.55E-06    | CDS  |
| hsa-miR-6788-5p  | XM_011543019 | CASP4 | 0.157008    | CDS  |
| hsa-miR-6788-5p  | XM_011543019 | CASP4 | 0.02723061  | CDS  |
| hsa-miR-6788-5p  | XM_011543019 | CASP4 | 0.000604446 | CDS  |
| hsa-miR-6788-3p  | XM_011543019 | CASP4 | 0.000725653 | CDS  |

|                 |              |       |             |      |
|-----------------|--------------|-------|-------------|------|
| hsa-miR-6788-3p | XM_011543019 | CASP4 | 0.000155947 | CDS  |
| hsa-miR-6789-5p | XM_011543019 | CASP4 | 0.001057457 | CDS  |
| hsa-miR-6789-3p | XM_011543019 | CASP4 | 0.01085729  | CDS  |
| hsa-miR-6790-3p | XM_011543019 | CASP4 | 2.55E-06    | CDS  |
| hsa-miR-6791-5p | XM_011543019 | CASP4 | 0.000282051 | CDS  |
| hsa-miR-6791-5p | XM_011543019 | CASP4 | 0.001166167 | 3UTR |
| hsa-miR-6792-5p | XM_011543019 | CASP4 | 0.03990186  | CDS  |
| hsa-miR-6792-5p | XM_011543019 | CASP4 | 0.000530791 | CDS  |
| hsa-miR-6792-3p | XM_011543019 | CASP4 | 5.70E-05    | CDS  |
| hsa-miR-6793-5p | XM_011543019 | CASP4 | 0.000652818 | 3UTR |
| hsa-miR-6794-5p | XM_011543019 | CASP4 | 0.005953452 | 3UTR |
| hsa-miR-6794-5p | XM_011543019 | CASP4 | 0.002868814 | CDS  |
| hsa-miR-6795-5p | XM_011543019 | CASP4 | 0.000844485 | CDS  |
| hsa-miR-6795-5p | XM_011543019 | CASP4 | 0.001723097 | CDS  |
| hsa-miR-6795-3p | XM_011543019 | CASP4 | 0.000525684 | CDS  |
| hsa-miR-6796-5p | XM_011543019 | CASP4 | 0.000346078 | CDS  |
| hsa-miR-6797-5p | XM_011543019 | CASP4 | 0.005953452 | 3UTR |
| hsa-miR-6798-5p | XM_011543019 | CASP4 | 0.005953452 | CDS  |
| hsa-miR-6799-3p | XM_011543019 | CASP4 | 2.02E-05    | CDS  |
| hsa-miR-6800-5p | XM_011543019 | CASP4 | 0.02503297  | CDS  |
| hsa-miR-6800-5p | XM_011543019 | CASP4 | 0.000190781 | CDS  |
| hsa-miR-6800-3p | XM_011543019 | CASP4 | 0.000958633 | CDS  |
| hsa-miR-6801-5p | XM_011543019 | CASP4 | 0.004176603 | CDS  |
| hsa-miR-6802-5p | XM_011543019 | CASP4 | 5.52E-05    | CDS  |
| hsa-miR-6802-5p | XM_011543019 | CASP4 | 4.84E-05    | CDS  |
| hsa-miR-6803-5p | XM_011543019 | CASP4 | 0.000690717 | CDS  |
| hsa-miR-6803-5p | XM_011543019 | CASP4 | 0.000606734 | CDS  |
| hsa-miR-6804-5p | XM_011543019 | CASP4 | 0.01864605  | CDS  |
| hsa-miR-6804-3p | XM_011543019 | CASP4 | 0.001338793 | 5UTR |
| hsa-miR-6805-5p | XM_011543019 | CASP4 | 0.01469811  | CDS  |
| hsa-miR-6805-5p | XM_011543019 | CASP4 | 1.92E-05    | 5UTR |
| hsa-miR-6806-5p | XM_011543019 | CASP4 | 0.000427548 | 5UTR |
| hsa-miR-6806-5p | XM_011543019 | CASP4 | 0.01274028  | CDS  |
| hsa-miR-6806-3p | XM_011543019 | CASP4 | 0.01017319  | CDS  |
| hsa-miR-6807-5p | XM_011543019 | CASP4 | 0.000215353 | CDS  |
| hsa-miR-6807-3p | XM_011543019 | CASP4 | 6.27E-05    | CDS  |
| hsa-miR-6807-3p | XM_011543019 | CASP4 | 0.004658662 | CDS  |
| hsa-miR-6808-5p | XM_011543019 | CASP4 | 0.001680409 | CDS  |
| hsa-miR-6809-3p | XM_011543019 | CASP4 | 0.3628757   | 5UTR |
| hsa-miR-6810-5p | XM_011543019 | CASP4 | 0.001074767 | 5UTR |
| hsa-miR-6810-3p | XM_011543019 | CASP4 | 1.38E-05    | CDS  |
| hsa-miR-6810-3p | XM_011543019 | CASP4 | 0.000525684 | CDS  |
| hsa-miR-6811-5p | XM_011543019 | CASP4 | 2.20E-05    | CDS  |
| hsa-miR-6811-3p | XM_011543019 | CASP4 | 0.007399047 | CDS  |

|                 |              |       |             |      |
|-----------------|--------------|-------|-------------|------|
| hsa-miR-6812-5p | XM_011543019 | CASP4 | 0.003791162 | CDS  |
| hsa-miR-6812-5p | XM_011543019 | CASP4 | 0.3794638   | CDS  |
| hsa-miR-6812-5p | XM_011543019 | CASP4 | 0.000353924 | 5UTR |
| hsa-miR-6813-5p | XM_011543019 | CASP4 | 0.005598497 | CDS  |
| hsa-miR-6814-5p | XM_011543019 | CASP4 | 0.000172777 | CDS  |
| hsa-miR-6814-3p | XM_011543019 | CASP4 | 0.000605186 | CDS  |
| hsa-miR-6815-5p | XM_011543019 | CASP4 | 4.36E-05    | CDS  |
| hsa-miR-6815-5p | XM_011543019 | CASP4 | 0.03887933  | 5UTR |
| hsa-miR-6815-3p | XM_011543019 | CASP4 | 0.002304037 | 5UTR |
| hsa-miR-6816-5p | XM_011543019 | CASP4 | 0.008948377 | CDS  |
| hsa-miR-6816-5p | XM_011543019 | CASP4 | 0.006276804 | 3UTR |
| hsa-miR-6817-5p | XM_011543019 | CASP4 | 0.01917344  | 5UTR |
| hsa-miR-6817-3p | XM_011543019 | CASP4 | 2.55E-06    | CDS  |
| hsa-miR-6817-3p | XM_011543019 | CASP4 | 0.000386263 | CDS  |
| hsa-miR-6818-5p | XM_011543019 | CASP4 | 0.01302503  | CDS  |
| hsa-miR-6818-5p | XM_011543019 | CASP4 | 0.290863    | CDS  |
| hsa-miR-6819-5p | XM_011543019 | CASP4 | 2.56E-05    | CDS  |
| hsa-miR-6819-5p | XM_011543019 | CASP4 | 0.004633643 | CDS  |
| hsa-miR-6819-3p | XM_011543019 | CASP4 | 2.59E-05    | CDS  |
| hsa-miR-6819-3p | XM_011543019 | CASP4 | 3.27E-05    | 5UTR |
| hsa-miR-6820-5p | XM_011543019 | CASP4 | 0.001725808 | 5UTR |
| hsa-miR-6820-5p | XM_011543019 | CASP4 | 0.01093692  | CDS  |
| hsa-miR-6820-5p | XM_011543019 | CASP4 | 0.000718843 | CDS  |
| hsa-miR-6820-5p | XM_011543019 | CASP4 | 0.001301877 | CDS  |
| hsa-miR-6821-5p | XM_011543019 | CASP4 | 0.000248728 | CDS  |
| hsa-miR-6822-3p | XM_011543019 | CASP4 | 8.39E-06    | CDS  |
| hsa-miR-6822-3p | XM_011543019 | CASP4 | 2.59E-05    | CDS  |
| hsa-miR-6822-3p | XM_011543019 | CASP4 | 0.000141499 | CDS  |
| hsa-miR-6823-5p | XM_011543019 | CASP4 | 0.006369709 | 3UTR |
| hsa-miR-6823-5p | XM_011543019 | CASP4 | 0.000189105 | CDS  |
| hsa-miR-6823-5p | XM_011543019 | CASP4 | 0.000717952 | 5UTR |
| hsa-miR-6823-3p | XM_011543019 | CASP4 | 0.000248963 | CDS  |
| hsa-miR-6824-5p | XM_011543019 | CASP4 | 0.001321211 | 5UTR |
| hsa-miR-6824-5p | XM_011543019 | CASP4 | 0.000215353 | CDS  |
| hsa-miR-6824-5p | XM_011543019 | CASP4 | 0.005953452 | 3UTR |
| hsa-miR-6824-3p | XM_011543019 | CASP4 | 0.000386263 | CDS  |
| hsa-miR-6824-3p | XM_011543019 | CASP4 | 0.002945966 | 5UTR |
| hsa-miR-6825-5p | XM_011543019 | CASP4 | 0.02456692  | CDS  |
| hsa-miR-6825-3p | XM_011543019 | CASP4 | 5.70E-05    | CDS  |
| hsa-miR-6825-3p | XM_011543019 | CASP4 | 0.02147881  | CDS  |
| hsa-miR-6826-5p | XM_011543019 | CASP4 | 0.008560229 | CDS  |
| hsa-miR-6826-3p | XM_011543019 | CASP4 | 0.3503675   | 5UTR |
| hsa-miR-6827-5p | XM_011543019 | CASP4 | 0.004304008 | CDS  |
| hsa-miR-6827-5p | XM_011543019 | CASP4 | 9.55E-05    | CDS  |

|                  |              |       |             |      |
|------------------|--------------|-------|-------------|------|
| hsa-miR-6828-3p  | XM_011543019 | CASP4 | 0.009638896 | 5UTR |
| hsa-miR-6829-5p  | XM_011543019 | CASP4 | 0.01298236  | 3UTR |
| hsa-miR-6829-3p  | XM_011543019 | CASP4 | 5.76E-05    | 5UTR |
| hsa-miR-6829-3p  | XM_011543019 | CASP4 | 0.004891425 | CDS  |
| hsa-miR-6830-5p  | XM_011543019 | CASP4 | 0.001702817 | CDS  |
| hsa-miR-6831-5p  | XM_011543019 | CASP4 | 0.000190781 | CDS  |
| hsa-miR-6832-3p  | XM_011543019 | CASP4 | 0.4669817   | 5UTR |
| hsa-miR-6833-5p  | XM_011543019 | CASP4 | 0.01049294  | CDS  |
| hsa-miR-6833-5p  | XM_011543019 | CASP4 | 0.0357771   | CDS  |
| hsa-miR-6834-5p  | XM_011543019 | CASP4 | 0.005208109 | 3UTR |
| hsa-miR-6834-5p  | XM_011543019 | CASP4 | 0.004418741 | CDS  |
| hsa-miR-6834-3p  | XM_011543019 | CASP4 | 0.000155947 | CDS  |
| hsa-miR-6835-5p  | XM_011543019 | CASP4 | 0.002558787 | CDS  |
| hsa-miR-6835-5p  | XM_011543019 | CASP4 | 0.000867817 | CDS  |
| hsa-miR-6780b-5p | XM_011543019 | CASP4 | 0.006276804 | CDS  |
| hsa-miR-6780b-3p | XM_011543019 | CASP4 | 0.000525684 | CDS  |
| hsa-miR-6836-5p  | XM_011543019 | CASP4 | 0.000818056 | CDS  |
| hsa-miR-6836-5p  | XM_011543019 | CASP4 | 0.01089887  | CDS  |
| hsa-miR-6836-3p  | XM_011543019 | CASP4 | 0.00136803  | 5UTR |
| hsa-miR-6837-5p  | XM_011543019 | CASP4 | 0.000587308 | 5UTR |
| hsa-miR-6838-3p  | XM_011543019 | CASP4 | 0.01637427  | 5UTR |
| hsa-miR-6838-3p  | XM_011543019 | CASP4 | 0.000875419 | 5UTR |
| hsa-miR-6839-3p  | XM_011543019 | CASP4 | 0.4382198   | 5UTR |
| hsa-miR-6840-5p  | XM_011543019 | CASP4 | 0.00307967  | CDS  |
| hsa-miR-6840-3p  | XM_011543019 | CASP4 | 4.84E-05    | CDS  |
| hsa-miR-6840-3p  | XM_011543019 | CASP4 | 0.000564804 | 5UTR |
| hsa-miR-6841-5p  | XM_011543019 | CASP4 | 0.004702132 | 5UTR |
| hsa-miR-6842-5p  | XM_011543019 | CASP4 | 8.94E-05    | CDS  |
| hsa-miR-6842-5p  | XM_011543019 | CASP4 | 1.92E-05    | 5UTR |
| hsa-miR-6845-5p  | XM_011543019 | CASP4 | 0.00023335  | CDS  |
| hsa-miR-6845-3p  | XM_011543019 | CASP4 | 0.001058085 | CDS  |
| hsa-miR-6846-5p  | XM_011543019 | CASP4 | 0.1696384   | CDS  |
| hsa-miR-6846-5p  | XM_011543019 | CASP4 | 0.001117349 | CDS  |
| hsa-miR-6846-5p  | XM_011543019 | CASP4 | 2.20E-05    | CDS  |
| hsa-miR-6846-3p  | XM_011543019 | CASP4 | 0.007669794 | CDS  |
| hsa-miR-6847-5p  | XM_011543019 | CASP4 | 0.000717477 | CDS  |
| hsa-miR-6847-3p  | XM_011543019 | CASP4 | 0.007399047 | CDS  |
| hsa-miR-6847-3p  | XM_011543019 | CASP4 | 0.000256876 | 5UTR |
| hsa-miR-6848-5p  | XM_011543019 | CASP4 | 0.005208109 | CDS  |
| hsa-miR-6848-3p  | XM_011543019 | CASP4 | 2.59E-05    | CDS  |
| hsa-miR-6848-3p  | XM_011543019 | CASP4 | 0.000320483 | CDS  |
| hsa-miR-6848-3p  | XM_011543019 | CASP4 | 0.06288141  | 5UTR |
| hsa-miR-6849-5p  | XM_011543019 | CASP4 | 0.004667567 | CDS  |
| hsa-miR-6849-5p  | XM_011543019 | CASP4 | 0.02221825  | CDS  |

|                  |              |       |             |      |
|------------------|--------------|-------|-------------|------|
| hsa-miR-6849-3p  | XM_011543019 | CASP4 | 3.30E-05    | 5UTR |
| hsa-miR-6849-3p  | XM_011543019 | CASP4 | 9.37E-05    | CDS  |
| hsa-miR-6850-5p  | XM_011543019 | CASP4 | 0.001321211 | 5UTR |
| hsa-miR-6851-5p  | XM_011543019 | CASP4 | 0.000867817 | CDS  |
| hsa-miR-6851-5p  | XM_011543019 | CASP4 | 2.56E-05    | CDS  |
| hsa-miR-6851-5p  | XM_011543019 | CASP4 | 8.94E-05    | CDS  |
| hsa-miR-6851-3p  | XM_011543019 | CASP4 | 0.004080075 | CDS  |
| hsa-miR-6852-5p  | XM_011543019 | CASP4 | 0.000872079 | 5UTR |
| hsa-miR-6852-5p  | XM_011543019 | CASP4 | 0.004819847 | CDS  |
| hsa-miR-6852-3p  | XM_011543019 | CASP4 | 9.47E-05    | CDS  |
| hsa-miR-6853-5p  | XM_011543019 | CASP4 | 0.001910621 | CDS  |
| hsa-miR-6853-5p  | XM_011543019 | CASP4 | 0.000678839 | 5UTR |
| hsa-miR-6855-5p  | XM_011543019 | CASP4 | 0.005598497 | CDS  |
| hsa-miR-6855-3p  | XM_011543019 | CASP4 | 1.38E-05    | CDS  |
| hsa-miR-6856-5p  | XM_011543019 | CASP4 | 8.44E-05    | CDS  |
| hsa-miR-6856-5p  | XM_011543019 | CASP4 | 0.07629977  | CDS  |
| hsa-miR-6856-3p  | XM_011543019 | CASP4 | 0.007399047 | CDS  |
| hsa-miR-6856-3p  | XM_011543019 | CASP4 | 0.000400512 | CDS  |
| hsa-miR-6856-3p  | XM_011543019 | CASP4 | 0.001412567 | 5UTR |
| hsa-miR-6857-5p  | XM_011543019 | CASP4 | 0.01093692  | CDS  |
| hsa-miR-6858-5p  | XM_011543019 | CASP4 | 0.000215353 | CDS  |
| hsa-miR-6858-5p  | XM_011543019 | CASP4 | 0.006276804 | CDS  |
| hsa-miR-6859-5p  | XM_011543019 | CASP4 | 0.001000701 | 5UTR |
| hsa-miR-6859-5p  | XM_011543019 | CASP4 | 0.001723097 | CDS  |
| hsa-miR-6859-3p  | XM_011543019 | CASP4 | 6.22E-06    | CDS  |
| hsa-miR-6769b-5p | XM_011543019 | CASP4 | 0.01049294  | CDS  |
| hsa-miR-6769b-3p | XM_011543019 | CASP4 | 0.000386263 | CDS  |
| hsa-miR-6860     | XM_011543019 | CASP4 | 0.006819084 | CDS  |
| hsa-miR-6860     | XM_011543019 | CASP4 | 1.71E-05    | CDS  |
| hsa-miR-6860     | XM_011543019 | CASP4 | 0.0177317   | CDS  |
| hsa-miR-6861-5p  | XM_011543019 | CASP4 | 0.000811613 | 5UTR |
| hsa-miR-6862-5p  | XM_011543019 | CASP4 | 0.000353171 | CDS  |
| hsa-miR-6862-5p  | XM_011543019 | CASP4 | 0.01412757  | CDS  |
| hsa-miR-6865-5p  | XM_011543019 | CASP4 | 0.000190781 | CDS  |
| hsa-miR-6865-5p  | XM_011543019 | CASP4 | 4.36E-05    | CDS  |
| hsa-miR-6865-5p  | XM_011543019 | CASP4 | 0.000867817 | CDS  |
| hsa-miR-6865-3p  | XM_011543019 | CASP4 | 2.02E-05    | CDS  |
| hsa-miR-6868-5p  | XM_011543019 | CASP4 | 0.02723061  | CDS  |
| hsa-miR-6869-5p  | XM_011543019 | CASP4 | 0.004418741 | CDS  |
| hsa-miR-6870-5p  | XM_011543019 | CASP4 | 0.000606734 | CDS  |
| hsa-miR-6870-5p  | XM_011543019 | CASP4 | 0.02834176  | 3UTR |
| hsa-miR-6870-3p  | XM_011543019 | CASP4 | 0.01403179  | CDS  |
| hsa-miR-6871-5p  | XM_011543019 | CASP4 | 0.000790121 | CDS  |
| hsa-miR-6871-5p  | XM_011543019 | CASP4 | 0.1004401   | CDS  |

|                 |              |       |             |      |
|-----------------|--------------|-------|-------------|------|
| hsa-miR-6871-5p | XM_011543019 | CASP4 | 0.005762653 | 5UTR |
| hsa-miR-6871-3p | XM_011543019 | CASP4 | 0.00124429  | CDS  |
| hsa-miR-6871-3p | XM_011543019 | CASP4 | 4.82E-05    | CDS  |
| hsa-miR-6872-3p | XM_011543019 | CASP4 | 0.000736504 | 5UTR |
| hsa-miR-6873-5p | XM_011543019 | CASP4 | 0.002709686 | CDS  |
| hsa-miR-6873-3p | XM_011543019 | CASP4 | 0.003929355 | CDS  |
| hsa-miR-6874-3p | XM_011543019 | CASP4 | 0.001560491 | CDS  |
| hsa-miR-6874-3p | XM_011543019 | CASP4 | 8.39E-06    | CDS  |
| hsa-miR-6875-5p | XM_011543019 | CASP4 | 0.001074767 | 5UTR |
| hsa-miR-6875-3p | XM_011543019 | CASP4 | 8.36E-06    | CDS  |
| hsa-miR-6875-3p | XM_011543019 | CASP4 | 0.002870221 | CDS  |
| hsa-miR-6876-5p | XM_011543019 | CASP4 | 0.001680409 | CDS  |
| hsa-miR-6876-3p | XM_011543019 | CASP4 | 0.00818147  | CDS  |
| hsa-miR-6877-5p | XM_011543019 | CASP4 | 0.000592024 | CDS  |
| hsa-miR-6877-5p | XM_011543019 | CASP4 | 0.004702132 | 5UTR |
| hsa-miR-6877-3p | XM_011543019 | CASP4 | 3.30E-05    | 5UTR |
| hsa-miR-6879-5p | XM_011543019 | CASP4 | 0.1530227   | CDS  |
| hsa-miR-6879-5p | XM_011543019 | CASP4 | 0.005598497 | CDS  |
| hsa-miR-6880-5p | XM_011543019 | CASP4 | 0.002095427 | CDS  |
| hsa-miR-6880-3p | XM_011543019 | CASP4 | 0.000127802 | CDS  |
| hsa-miR-6881-5p | XM_011543019 | CASP4 | 0.00080334  | CDS  |
| hsa-miR-6881-5p | XM_011543019 | CASP4 | 0.002726335 | CDS  |
| hsa-miR-6881-5p | XM_011543019 | CASP4 | 0.02834176  | 3UTR |
| hsa-miR-6881-3p | XM_011543019 | CASP4 | 0.002462912 | CDS  |
| hsa-miR-6883-5p | XM_011543019 | CASP4 | 0.006369709 | 3UTR |
| hsa-miR-6885-5p | XM_011543019 | CASP4 | 0.005953452 | CDS  |
| hsa-miR-6886-3p | XM_011543019 | CASP4 | 0.000131593 | CDS  |
| hsa-miR-6887-5p | XM_011543019 | CASP4 | 0.000844485 | CDS  |
| hsa-miR-6888-5p | XM_011543019 | CASP4 | 0.000933598 | 5UTR |
| hsa-miR-6888-5p | XM_011543019 | CASP4 | 0.002868814 | CDS  |
| hsa-miR-6889-5p | XM_011543019 | CASP4 | 7.63E-06    | CDS  |
| hsa-miR-6889-5p | XM_011543019 | CASP4 | 0.001000701 | 5UTR |
| hsa-miR-6890-3p | XM_011543019 | CASP4 | 0.001140635 | CDS  |
| hsa-miR-6891-3p | XM_011543019 | CASP4 | 0.000525684 | CDS  |
| hsa-miR-6893-3p | XM_011543019 | CASP4 | 0.000525684 | CDS  |
| hsa-miR-6894-5p | XM_011543019 | CASP4 | 0.000867817 | CDS  |
| hsa-miR-6894-3p | XM_011543019 | CASP4 | 0.3503675   | 5UTR |
| hsa-miR-6894-3p | XM_011543019 | CASP4 | 0.000127802 | CDS  |
| hsa-miR-6895-5p | XM_011543019 | CASP4 | 0.002150872 | CDS  |
| hsa-miR-7106-5p | XM_011543019 | CASP4 | 0.005953452 | 3UTR |
| hsa-miR-7106-5p | XM_011543019 | CASP4 | 0.02264435  | CDS  |
| hsa-miR-7106-3p | XM_011543019 | CASP4 | 0.01017319  | CDS  |
| hsa-miR-7107-5p | XM_011543019 | CASP4 | 0.002526276 | CDS  |
| hsa-miR-7107-5p | XM_011543019 | CASP4 | 0.000592024 | CDS  |

|                 |              |       |             |      |
|-----------------|--------------|-------|-------------|------|
| hsa-miR-7107-5p | XM_011543019 | CASP4 | 4.34E-05    | CDS  |
| hsa-miR-7107-3p | XM_011543019 | CASP4 | 0.001427036 | CDS  |
| hsa-miR-7108-5p | XM_011543019 | CASP4 | 0.002980244 | CDS  |
| hsa-miR-7108-3p | XM_011543019 | CASP4 | 2.02E-05    | CDS  |
| hsa-miR-7109-5p | XM_011543019 | CASP4 | 0.000172777 | CDS  |
| hsa-miR-7109-3p | XM_011543019 | CASP4 | 0.2372913   | 5UTR |
| hsa-miR-7110-5p | XM_011543019 | CASP4 | 0.005208109 | CDS  |
| hsa-miR-7110-5p | XM_011543019 | CASP4 | 0.3492843   | CDS  |
| hsa-miR-7110-5p | XM_011543019 | CASP4 | 0.000651958 | CDS  |
| hsa-miR-7110-5p | XM_011543019 | CASP4 | 0.01007283  | CDS  |
| hsa-miR-7110-3p | XM_011543019 | CASP4 | 0.000386263 | CDS  |
| hsa-miR-7111-5p | XM_011543019 | CASP4 | 0.000606734 | CDS  |
| hsa-miR-7111-3p | XM_011543019 | CASP4 | 0.3503675   | 5UTR |
| hsa-miR-7112-5p | XM_011543019 | CASP4 | 2.78E-05    | CDS  |
| hsa-miR-7112-5p | XM_011543019 | CASP4 | 0.006819084 | 3UTR |
| hsa-miR-7112-3p | XM_011543019 | CASP4 | 0.004658662 | CDS  |
| hsa-miR-7112-3p | XM_011543019 | CASP4 | 0.007719451 | 5UTR |
| hsa-miR-7113-5p | XM_011543019 | CASP4 | 3.01E-06    | CDS  |
| hsa-miR-7113-5p | XM_011543019 | CASP4 | 2.93E-05    | CDS  |
| hsa-miR-7113-5p | XM_011543019 | CASP4 | 0.000872079 | 5UTR |
| hsa-miR-7114-5p | XM_011543019 | CASP4 | 0.000155947 | CDS  |
| hsa-miR-7114-5p | XM_011543019 | CASP4 | 0.09921762  | 5UTR |
| hsa-miR-7114-3p | XM_011543019 | CASP4 | 6.22E-06    | CDS  |
| hsa-miR-7150    | XM_011543019 | CASP4 | 0.002526276 | CDS  |
| hsa-miR-7151-5p | XM_011543019 | CASP4 | 0.002728573 | CDS  |
| hsa-miR-7152-3p | XM_011543019 | CASP4 | 0.004127298 | CDS  |
| hsa-miR-7154-5p | XM_011543019 | CASP4 | 0.000534813 | 3UTR |
| hsa-miR-7154-3p | XM_011543019 | CASP4 | 0.000717477 | CDS  |
| hsa-miR-7154-3p | XM_011543019 | CASP4 | 0.001723097 | CDS  |
| hsa-miR-7154-3p | XM_011543019 | CASP4 | 0.001396956 | 5UTR |
| hsa-miR-7155-5p | XM_011543019 | CASP4 | 4.61E-06    | CDS  |
| hsa-miR-7156-5p | XM_011543019 | CASP4 | 9.07E-06    | CDS  |
| hsa-miR-7156-3p | XM_011543019 | CASP4 | 0.000127802 | CDS  |
| hsa-miR-7156-3p | XM_011543019 | CASP4 | 0.003358621 | 5UTR |
| hsa-miR-7158-5p | XM_011543019 | CASP4 | 0.002728573 | CDS  |
| hsa-miR-7158-5p | XM_011543019 | CASP4 | 2.49E-05    | 5UTR |
| hsa-miR-7158-3p | XM_011543019 | CASP4 | 0.07629977  | CDS  |
| hsa-miR-7161-5p | XM_011543019 | CASP4 | 0.000316826 | CDS  |
| hsa-miR-7161-3p | XM_011543019 | CASP4 | 0.000385285 | 5UTR |
| hsa-miR-7161-3p | XM_011543019 | CASP4 | 1.06E-05    | CDS  |
| hsa-miR-7160-5p | XM_011543019 | CASP4 | 0.005133538 | CDS  |
| hsa-miR-7160-5p | XM_011543019 | CASP4 | 0.000343441 | CDS  |
| hsa-miR-7160-5p | XM_011543019 | CASP4 | 0.000646778 | CDS  |
| hsa-miR-7160-3p | XM_011543019 | CASP4 | 0.000633984 | CDS  |



|                  |              |       |             |      |
|------------------|--------------|-------|-------------|------|
| hsa-miR-7160-3p  | XM_011543019 | CASP4 | 0.01350715  | CDS  |
| hsa-miR-7162-3p  | XM_011543019 | CASP4 | 0.000306861 | 5UTR |
| hsa-miR-7515     | XM_011543019 | CASP4 | 0.02336121  | CDS  |
| hsa-miR-7703     | XM_011543019 | CASP4 | 0.01555822  | CDS  |
| hsa-miR-7703     | XM_011543019 | CASP4 | 5.70E-05    | CDS  |
| hsa-miR-7706     | XM_011543019 | CASP4 | 0.000379457 | 5UTR |
| hsa-miR-7706     | XM_011543019 | CASP4 | 0.005208277 | 5UTR |
| hsa-miR-7843-5p  | XM_011543019 | CASP4 | 0.001723097 | CDS  |
| hsa-miR-7843-3p  | XM_011543019 | CASP4 | 0.000294115 | CDS  |
| hsa-miR-7843-3p  | XM_011543019 | CASP4 | 0.005208277 | 5UTR |
| hsa-miR-4433b-5p | XM_011543019 | CASP4 | 6.22E-06    | CDS  |
| hsa-miR-4433b-3p | XM_011543019 | CASP4 | 0.04098359  | 3UTR |
| hsa-miR-4433b-3p | XM_011543019 | CASP4 | 4.39E-05    | CDS  |
| hsa-miR-4433b-3p | XM_011543019 | CASP4 | 0.001680409 | CDS  |
| hsa-miR-1273h-5p | XM_011543019 | CASP4 | 0.005953452 | 3UTR |
| hsa-miR-1273h-5p | XM_011543019 | CASP4 | 0.00023617  | CDS  |
| hsa-miR-1273h-3p | XM_011543019 | CASP4 | 0.000127802 | CDS  |
| hsa-miR-1273h-3p | XM_011543019 | CASP4 | 0.01462679  | CDS  |
| hsa-miR-6516-5p  | XM_011543019 | CASP4 | 0.06220463  | CDS  |
| hsa-miR-7844-5p  | XM_011543019 | CASP4 | 4.84E-05    | CDS  |
| hsa-miR-7844-5p  | XM_011543019 | CASP4 | 0.003677598 | CDS  |
| hsa-miR-7845-5p  | XM_011543019 | CASP4 | 0.001560807 | CDS  |
| hsa-miR-7846-3p  | XM_011543019 | CASP4 | 2.70E-05    | CDS  |
| hsa-miR-7846-3p  | XM_011543019 | CASP4 | 0.000155666 | CDS  |
| hsa-miR-7847-3p  | XM_011543019 | CASP4 | 0.002709686 | CDS  |
| hsa-miR-7847-3p  | XM_011543019 | CASP4 | 0.000907814 | CDS  |
| hsa-miR-7848-3p  | XM_011543019 | CASP4 | 8.36E-06    | CDS  |
| hsa-miR-7849-3p  | XM_011543019 | CASP4 | 0.000572465 | CDS  |
| hsa-miR-7850-5p  | XM_011543019 | CASP4 | 6.59E-07    | CDS  |
| hsa-miR-7851-3p  | XM_011543019 | CASP4 | 0.001735767 | CDS  |
| hsa-miR-7855-5p  | XM_011543019 | CASP4 | 0.002990015 | CDS  |
| hsa-miR-7855-5p  | XM_011543019 | CASP4 | 0.00233213  | CDS  |
| hsa-miR-7855-5p  | XM_011543019 | CASP4 | 0.002314096 | 5UTR |
| hsa-miR-7856-5p  | XM_011543019 | CASP4 | 0.000402304 | CDS  |
| hsa-miR-7973     | XM_011543019 | CASP4 | 0.009621379 | 5UTR |
| hsa-miR-7974     | XM_011543019 | CASP4 | 0.000127802 | CDS  |
| hsa-miR-7978     | XM_011543019 | CASP4 | 0.000873931 | CDS  |
| hsa-miR-8052     | XM_011543019 | CASP4 | 0.001560807 | CDS  |
| hsa-miR-8052     | XM_011543019 | CASP4 | 0.00023335  | CDS  |
| hsa-miR-8056     | XM_011543019 | CASP4 | 0.000131593 | CDS  |
| hsa-miR-8056     | XM_011543019 | CASP4 | 0.00277265  | 5UTR |
| hsa-miR-8057     | XM_011543019 | CASP4 | 4.82E-05    | CDS  |
| hsa-miR-8059     | XM_011543019 | CASP4 | 0.01193851  | CDS  |
| hsa-miR-8060     | XM_011543019 | CASP4 | 0.000592176 | CDS  |

|                  |              |       |             |      |
|------------------|--------------|-------|-------------|------|
| hsa-miR-8060     | XM_011543019 | CASP4 | 0.003747754 | CDS  |
| hsa-miR-8069     | XM_011543019 | CASP4 | 0.005060872 | 3UTR |
| hsa-miR-8069     | XM_011543019 | CASP4 | 0.004285404 | CDS  |
| hsa-miR-8072     | XM_011543019 | CASP4 | 0.000867817 | CDS  |
| hsa-miR-8072     | XM_011543019 | CASP4 | 0.002526276 | CDS  |
| hsa-miR-8072     | XM_011543019 | CASP4 | 0.003193467 | CDS  |
| hsa-miR-8073     | XM_011543019 | CASP4 | 1.59E-05    | CDS  |
| hsa-miR-8073     | XM_011543019 | CASP4 | 0.000616808 | CDS  |
| hsa-miR-8073     | XM_011543019 | CASP4 | 0.000723216 | CDS  |
| hsa-miR-8075     | XM_011543019 | CASP4 | 0.007814787 | CDS  |
| hsa-miR-8075     | XM_011543019 | CASP4 | 0.000836616 | CDS  |
| hsa-miR-8077     | XM_011543019 | CASP4 | 0.000314076 | CDS  |
| hsa-miR-8077     | XM_011543019 | CASP4 | 7.30E-05    | CDS  |
| hsa-miR-8077     | XM_011543019 | CASP4 | 0.001122082 | 5UTR |
| hsa-miR-8077     | XM_011543019 | CASP4 | 0.000718843 | CDS  |
| hsa-miR-8078     | XM_011543019 | CASP4 | 0.00293118  | CDS  |
| hsa-miR-8078     | XM_011543019 | CASP4 | 0.000983833 | 5UTR |
| hsa-miR-8078     | XM_011543019 | CASP4 | 0.001652899 | 5UTR |
| hsa-miR-8080     | XM_011543019 | CASP4 | 0.000717477 | CDS  |
| hsa-miR-8080     | XM_011543019 | CASP4 | 0.02336121  | CDS  |
| hsa-miR-8081     | XM_011543019 | CASP4 | 8.78E-05    | 5UTR |
| hsa-miR-8082     | XM_011543019 | CASP4 | 0.005133538 | CDS  |
| hsa-miR-8087     | XM_011543019 | CASP4 | 0.000689104 | 3UTR |
| hsa-miR-8088     | XM_011543019 | CASP4 | 0.000907814 | CDS  |
| hsa-miR-8088     | XM_011543019 | CASP4 | 0.008560229 | CDS  |
| hsa-miR-8089     | XM_011543019 | CASP4 | 3.30E-05    | CDS  |
| hsa-miR-8089     | XM_011543019 | CASP4 | 0.002726335 | CDS  |
| hsa-miR-9500     | XM_011543019 | CASP4 | 0.02336121  | CDS  |
| hsa-miR-9500     | XM_011543019 | CASP4 | 0.000647898 | CDS  |
| hsa-miR-9500     | XM_011543019 | CASP4 | 0.002284785 | CDS  |
| hsa-miR-9718     | XM_011543019 | CASP4 | 0.004480019 | CDS  |
| hsa-miR-9718     | XM_011543019 | CASP4 | 0.000957196 | CDS  |
| hsa-miR-9901     | XM_011543019 | CASP4 | 0.000723658 | CDS  |
| hsa-miR-9902     | XM_011543019 | CASP4 | 0.000127802 | CDS  |
| hsa-miR-1843     | XM_011543019 | CASP4 | 1.16E-05    | CDS  |
| hsa-miR-1843     | XM_011543019 | CASP4 | 2.49E-05    | 5UTR |
| hsa-miR-9986     | XM_011543019 | CASP4 | 0.001321211 | 5UTR |
| hsa-miR-9986     | XM_011543019 | CASP4 | 0.002472239 | 5UTR |
| hsa-miR-10226    | XM_011543019 | CASP4 | 0.000515943 | CDS  |
| hsa-miR-10226    | XM_011543019 | CASP4 | 0.000387079 | CDS  |
| hsa-miR-10392-5p | XM_011543019 | CASP4 | 0.000635321 | 3UTR |
| hsa-miR-10392-5p | XM_011543019 | CASP4 | 4.82E-05    | CDS  |
| hsa-miR-10392-3p | XM_011543019 | CASP4 | 8.39E-06    | CDS  |
| hsa-miR-10394-5p | XM_011543019 | CASP4 | 4.61E-06    | CDS  |

|                   |              |       |             |      |
|-------------------|--------------|-------|-------------|------|
| hsa-miR-10394-3p  | XM_011543019 | CASP4 | 0.000248963 | CDS  |
| hsa-miR-10394-3p  | XM_011543019 | CASP4 | 0.01298236  | CDS  |
| hsa-miR-10395-5p  | XM_011543019 | CASP4 | 0.2935726   | CDS  |
| hsa-miR-10396a-5p | XM_011543019 | CASP4 | 0.001229686 | CDS  |
| hsa-miR-10396a-3p | XM_011543019 | CASP4 | 9.12E-06    | CDS  |
| hsa-miR-10396a-3p | XM_011543019 | CASP4 | 0.001474321 | CDS  |
| hsa-miR-10397-5p  | XM_011543019 | CASP4 | 0.002623219 | 5UTR |
| hsa-miR-10397-5p  | XM_011543019 | CASP4 | 0.000958633 | 5UTR |
| hsa-miR-10397-3p  | XM_011543019 | CASP4 | 0.004002583 | CDS  |
| hsa-miR-10398-3p  | XM_011543019 | CASP4 | 0.000526877 | CDS  |
| hsa-miR-10398-3p  | XM_011543019 | CASP4 | 0.000635321 | CDS  |
| hsa-miR-10399-5p  | XM_011543019 | CASP4 | 0.002005412 | 5UTR |
| hsa-miR-10399-3p  | XM_011543019 | CASP4 | 0.000163841 | 5UTR |
| hsa-miR-10400-5p  | XM_011543019 | CASP4 | 0.002981617 | CDS  |
| hsa-miR-10400-5p  | XM_011543019 | CASP4 | 0.1546664   | CDS  |
| hsa-miR-10400-3p  | XM_011543019 | CASP4 | 4.48E-05    | CDS  |
| hsa-miR-10401-5p  | XM_011543019 | CASP4 | 0.002709686 | CDS  |
| hsa-miR-10396b-5p | XM_011543019 | CASP4 | 0.001229686 | CDS  |
| hsa-miR-10396b-3p | XM_011543019 | CASP4 | 9.12E-06    | CDS  |
| hsa-miR-10396b-3p | XM_011543019 | CASP4 | 0.001474321 | CDS  |
| hsa-miR-10523-5p  | XM_011543019 | CASP4 | 0.000572465 | CDS  |
| hsa-miR-9983-3p   | XM_011543019 | CASP4 | 0.002880844 | 5UTR |
| hsa-miR-10524-5p  | XM_011543019 | CASP4 | 4.39E-05    | CDS  |
| hsa-miR-10526-3p  | XM_011543019 | CASP4 | 0.006369709 | CDS  |
| hsa-miR-10526-3p  | XM_011543019 | CASP4 | 0.001063228 | CDS  |
| hsa-miR-11181-5p  | XM_011543019 | CASP4 | 3.30E-05    | CDS  |
| hsa-miR-11181-3p  | XM_011543019 | CASP4 | 0.000867817 | CDS  |
| hsa-miR-11399     | XM_011543019 | CASP4 | 2.78E-05    | CDS  |
| hsa-miR-11400     | XM_011543019 | CASP4 | 0.002728573 | CDS  |
| hsa-miR-11400     | XM_011543019 | CASP4 | 0.01017319  | CDS  |
| hsa-miR-11401     | XM_011543019 | CASP4 | 0.000515943 | CDS  |
| hsa-miR-11401     | XM_011543019 | CASP4 | 6.19E-05    | CDS  |
| hsa-miR-3059-5p   | XM_011543019 | CASP4 | 0.01088552  | CDS  |
| hsa-miR-3085-5p   | XM_011543019 | CASP4 | 9.55E-05    | CDS  |
| hsa-miR-3085-5p   | XM_011543019 | CASP4 | 0.02761587  | CDS  |
| hsa-miR-3085-5p   | XM_011543019 | CASP4 | 4.82E-05    | CDS  |
| hsa-miR-3085-3p   | XM_011543019 | CASP4 | 2.48E-05    | 5UTR |
| hsa-miR-3085-3p   | XM_011543019 | CASP4 | 0.01923861  | 3UTR |
| hsa-miR-6529-3p   | XM_011543019 | CASP4 | 0.00778497  | CDS  |
| hsa-miR-12113     | XM_011543019 | CASP4 | 0.003929355 | CDS  |
| hsa-miR-12114     | XM_011543019 | CASP4 | 0.000190781 | CDS  |
| hsa-miR-12114     | XM_011543019 | CASP4 | 0.001680409 | CDS  |
| hsa-miR-12114     | XM_011543019 | CASP4 | 0.000547632 | 3UTR |
| hsa-miR-12118     | XM_011543019 | CASP4 | 0.006369709 | 3UTR |

|                  |              |       |             |      |
|------------------|--------------|-------|-------------|------|
| hsa-miR-12119    | XM_011543019 | CASP4 | 0.01864605  | CDS  |
| hsa-miR-12119    | XM_011543019 | CASP4 | 0.004938008 | 5UTR |
| hsa-miR-12120    | XM_011543019 | CASP4 | 0.000717477 | CDS  |
| hsa-miR-12121    | XM_011543019 | CASP4 | 0.00307967  | CDS  |
| hsa-miR-12121    | XM_011543019 | CASP4 | 0.003042605 | CDS  |
| hsa-miR-12124    | XM_011543019 | CASP4 | 0.00080334  | CDS  |
| hsa-miR-12126    | XM_011543019 | CASP4 | 0.000256876 | 5UTR |
| hsa-miR-12127    | XM_011543019 | CASP4 | 0.001000701 | 5UTR |
| hsa-miR-12128    | XM_011543019 | CASP4 | 0.00588506  | CDS  |
| hsa-miR-12129    | XM_011543019 | CASP4 | 0.000180943 | 5UTR |
| hsa-miR-12130    | XM_011543019 | CASP4 | 0.005470165 | CDS  |
| hsa-let-7a-5p    | NM_001225    | CASP4 | 0.01506736  | CDS  |
| hsa-let-7a-2-3p  | NM_001225    | CASP4 | 0.001021701 | CDS  |
| hsa-let-7b-5p    | NM_001225    | CASP4 | 0.01506736  | CDS  |
| hsa-let-7c-5p    | NM_001225    | CASP4 | 0.01506736  | CDS  |
| hsa-let-7d-5p    | NM_001225    | CASP4 | 0.1524418   | CDS  |
| hsa-let-7e-5p    | NM_001225    | CASP4 | 0.01506736  | CDS  |
| hsa-let-7e-5p    | NM_001225    | CASP4 | 0.001057457 | CDS  |
| hsa-let-7f-5p    | NM_001225    | CASP4 | 0.004269467 | CDS  |
| hsa-let-7f-5p    | NM_001225    | CASP4 | 0.001482999 | CDS  |
| hsa-let-7f-2-3p  | NM_001225    | CASP4 | 5.97E-05    | 5UTR |
| hsa-miR-15a-5p   | NM_001225    | CASP4 | 0.006381234 | CDS  |
| hsa-miR-15a-3p   | NM_001225    | CASP4 | 0.007399047 | CDS  |
| hsa-miR-16-5p    | NM_001225    | CASP4 | 0.006381234 | CDS  |
| hsa-miR-18a-3p   | NM_001225    | CASP4 | 0.000188063 | CDS  |
| hsa-miR-18a-3p   | NM_001225    | CASP4 | 9.07E-06    | CDS  |
| hsa-miR-19b-1-5p | NM_001225    | CASP4 | 0.001427036 | CDS  |
| hsa-miR-19b-1-5p | NM_001225    | CASP4 | 0.0002477   | CDS  |
| hsa-miR-19b-2-5p | NM_001225    | CASP4 | 0.0002477   | CDS  |
| hsa-miR-21-5p    | NM_001225    | CASP4 | 0.000282051 | CDS  |
| hsa-miR-21-3p    | NM_001225    | CASP4 | 0.000469015 | CDS  |
| hsa-miR-23a-5p   | NM_001225    | CASP4 | 0.000661315 | 3UTR |
| hsa-miR-23a-5p   | NM_001225    | CASP4 | 0.00080334  | CDS  |
| hsa-miR-23a-5p   | NM_001225    | CASP4 | 3.80E-05    | CDS  |
| hsa-miR-23a-3p   | NM_001225    | CASP4 | 0.001495267 | CDS  |
| hsa-miR-23a-3p   | NM_001225    | CASP4 | 0.008560229 | CDS  |
| hsa-miR-24-3p    | NM_001225    | CASP4 | 0.000248963 | CDS  |
| hsa-miR-24-3p    | NM_001225    | CASP4 | 0.001759625 | CDS  |
| hsa-miR-26a-5p   | NM_001225    | CASP4 | 0.003717217 | CDS  |
| hsa-miR-26a-1-3p | NM_001225    | CASP4 | 0.000515943 | CDS  |
| hsa-miR-26b-3p   | NM_001225    | CASP4 | 0.007606361 | CDS  |
| hsa-miR-27a-5p   | NM_001225    | CASP4 | 0.005598497 | 3UTR |
| hsa-miR-27a-3p   | NM_001225    | CASP4 | 0.01403179  | CDS  |
| hsa-miR-27a-3p   | NM_001225    | CASP4 | 0.001918944 | CDS  |

|                   |           |       |             |      |
|-------------------|-----------|-------|-------------|------|
| hsa-miR-28-3p     | NM_001225 | CASP4 | 0.001474321 | CDS  |
| hsa-miR-29a-5p    | NM_001225 | CASP4 | 0.007606361 | CDS  |
| hsa-miR-33a-3p    | NM_001225 | CASP4 | 0.1783802   | CDS  |
| hsa-miR-92a-3p    | NM_001225 | CASP4 | 5.83E-05    | CDS  |
| hsa-miR-92a-2-5p  | NM_001225 | CASP4 | 0.01469811  | CDS  |
| hsa-miR-93-5p     | NM_001225 | CASP4 | 0.00707833  | CDS  |
| hsa-miR-93-3p     | NM_001225 | CASP4 | 0.01462679  | CDS  |
| hsa-miR-96-3p     | NM_001225 | CASP4 | 0.003858073 | CDS  |
| hsa-miR-98-5p     | NM_001225 | CASP4 | 0.01506736  | CDS  |
| hsa-miR-99a-5p    | NM_001225 | CASP4 | 0.000188063 | CDS  |
| hsa-miR-99a-3p    | NM_001225 | CASP4 | 0.000725653 | CDS  |
| hsa-miR-100-5p    | NM_001225 | CASP4 | 9.14E-06    | CDS  |
| hsa-miR-29b-1-5p  | NM_001225 | CASP4 | 0.01082276  | CDS  |
| hsa-miR-29b-1-5p  | NM_001225 | CASP4 | 0.000748699 | CDS  |
| hsa-miR-29b-2-5p  | NM_001225 | CASP4 | 0.000231173 | CDS  |
| hsa-miR-103a-2-5p | NM_001225 | CASP4 | 5.71E-05    | 5UTR |
| hsa-miR-103a-2-5p | NM_001225 | CASP4 | 0.002304037 | CDS  |
| hsa-miR-103a-3p   | NM_001225 | CASP4 | 0.006381234 | CDS  |
| hsa-miR-103a-1-5p | NM_001225 | CASP4 | 5.71E-05    | 5UTR |
| hsa-miR-103a-1-5p | NM_001225 | CASP4 | 0.002304037 | CDS  |
| hsa-miR-105-5p    | NM_001225 | CASP4 | 0.001561664 | CDS  |
| hsa-miR-107       | NM_001225 | CASP4 | 0.006381234 | CDS  |
| hsa-miR-192-3p    | NM_001225 | CASP4 | 0.00859865  | 5UTR |
| hsa-miR-196a-5p   | NM_001225 | CASP4 | 0.1530227   | CDS  |
| hsa-miR-197-5p    | NM_001225 | CASP4 | 0.02762239  | CDS  |
| hsa-miR-198       | NM_001225 | CASP4 | 0.000887313 | CDS  |
| hsa-miR-198       | NM_001225 | CASP4 | 0.00293118  | CDS  |
| hsa-miR-208a-5p   | NM_001225 | CASP4 | 5.42E-05    | CDS  |
| hsa-miR-129-5p    | NM_001225 | CASP4 | 3.17E-07    | CDS  |
| hsa-miR-129-5p    | NM_001225 | CASP4 | 0.000637219 | 3UTR |
| hsa-miR-30c-2-3p  | NM_001225 | CASP4 | 0.004304008 | CDS  |
| hsa-miR-30c-2-3p  | NM_001225 | CASP4 | 0.02723061  | CDS  |
| hsa-miR-30d-5p    | NM_001225 | CASP4 | 0.1026343   | CDS  |
| hsa-miR-139-5p    | NM_001225 | CASP4 | 0.000293966 | CDS  |
| hsa-miR-139-5p    | NM_001225 | CASP4 | 0.02709291  | CDS  |
| hsa-miR-139-3p    | NM_001225 | CASP4 | 5.42E-05    | CDS  |
| hsa-miR-139-3p    | NM_001225 | CASP4 | 0.000218895 | CDS  |
| hsa-miR-147a      | NM_001225 | CASP4 | 0.005709682 | CDS  |
| hsa-miR-10b-3p    | NM_001225 | CASP4 | 0.000137537 | CDS  |
| hsa-miR-34a-5p    | NM_001225 | CASP4 | 0.000449296 | CDS  |
| hsa-miR-181b-5p   | NM_001225 | CASP4 | 0.001782072 | CDS  |
| hsa-miR-181c-3p   | NM_001225 | CASP4 | 0.001474321 | CDS  |
| hsa-miR-187-3p    | NM_001225 | CASP4 | 0.06230945  | CDS  |
| hsa-miR-205-5p    | NM_001225 | CASP4 | 0.01515751  | CDS  |

|                   |           |       |             |      |
|-------------------|-----------|-------|-------------|------|
| hsa-miR-205-5p    | NM_001225 | CASP4 | 0.003929355 | CDS  |
| hsa-miR-210-3p    | NM_001225 | CASP4 | 0.002318726 | CDS  |
| hsa-miR-212-3p    | NM_001225 | CASP4 | 0.000428925 | CDS  |
| hsa-miR-214-5p    | NM_001225 | CASP4 | 0.08945923  | CDS  |
| hsa-miR-215-3p    | NM_001225 | CASP4 | 0.01557019  | 5UTR |
| hsa-miR-215-3p    | NM_001225 | CASP4 | 4.32E-05    | CDS  |
| hsa-miR-216a-5p   | NM_001225 | CASP4 | 0.000907136 | CDS  |
| hsa-miR-218-1-3p  | NM_001225 | CASP4 | 0.002731967 | CDS  |
| hsa-miR-219a-1-3p | NM_001225 | CASP4 | 8.78E-05    | CDS  |
| hsa-miR-222-3p    | NM_001225 | CASP4 | 0.01194194  | CDS  |
| hsa-miR-224-5p    | NM_001225 | CASP4 | 6.51E-05    | CDS  |
| hsa-miR-224-3p    | NM_001225 | CASP4 | 4.70E-05    | CDS  |
| hsa-miR-200b-5p   | NM_001225 | CASP4 | 0.01923861  | 3UTR |
| hsa-let-7g-5p     | NM_001225 | CASP4 | 0.01506736  | CDS  |
| hsa-let-7g-3p     | NM_001225 | CASP4 | 0.00023617  | CDS  |
| hsa-let-7i-5p     | NM_001225 | CASP4 | 0.07629977  | CDS  |
| hsa-let-7i-5p     | NM_001225 | CASP4 | 0.01128548  | CDS  |
| hsa-let-7i-5p     | NM_001225 | CASP4 | 0.04226006  | CDS  |
| hsa-miR-15b-5p    | NM_001225 | CASP4 | 0.006381234 | CDS  |
| hsa-miR-23b-5p    | NM_001225 | CASP4 | 0.001839698 | CDS  |
| hsa-miR-23b-3p    | NM_001225 | CASP4 | 0.001495267 | CDS  |
| hsa-miR-30b-3p    | NM_001225 | CASP4 | 0.000604446 | CDS  |
| hsa-miR-30b-3p    | NM_001225 | CASP4 | 0.02723061  | CDS  |
| hsa-miR-124-3p    | NM_001225 | CASP4 | 0.000437056 | CDS  |
| hsa-miR-125b-1-3p | NM_001225 | CASP4 | 0.02761587  | CDS  |
| hsa-miR-125b-1-3p | NM_001225 | CASP4 | 5.42E-05    | CDS  |
| hsa-miR-125b-1-3p | NM_001225 | CASP4 | 0.00293118  | CDS  |
| hsa-miR-128-1-5p  | NM_001225 | CASP4 | 4.39E-05    | CDS  |
| hsa-miR-132-5p    | NM_001225 | CASP4 | 0.006994664 | CDS  |
| hsa-miR-132-5p    | NM_001225 | CASP4 | 0.002877047 | CDS  |
| hsa-miR-133a-3p   | NM_001225 | CASP4 | 0.002990015 | CDS  |
| hsa-miR-133a-3p   | NM_001225 | CASP4 | 0.00037239  | CDS  |
| hsa-miR-135a-5p   | NM_001225 | CASP4 | 0.000797533 | CDS  |
| hsa-miR-135a-3p   | NM_001225 | CASP4 | 0.000383308 | CDS  |
| hsa-miR-135a-3p   | NM_001225 | CASP4 | 0.01004367  | CDS  |
| hsa-miR-135a-3p   | NM_001225 | CASP4 | 0.005598497 | 3UTR |
| hsa-miR-135a-2-3p | NM_001225 | CASP4 | 2.52E-05    | 5UTR |
| hsa-miR-137-5p    | NM_001225 | CASP4 | 0.01800674  | CDS  |
| hsa-miR-138-5p    | NM_001225 | CASP4 | 0.03258219  | CDS  |
| hsa-miR-140-5p    | NM_001225 | CASP4 | 0.002346691 | CDS  |
| hsa-miR-141-5p    | NM_001225 | CASP4 | 0.000738411 | 5UTR |
| hsa-miR-141-5p    | NM_001225 | CASP4 | 0.141785    | CDS  |
| hsa-miR-141-3p    | NM_001225 | CASP4 | 0.03266314  | CDS  |
| hsa-miR-143-5p    | NM_001225 | CASP4 | 0.000427688 | CDS  |

|                   |           |       |             |      |
|-------------------|-----------|-------|-------------|------|
| hsa-miR-143-5p    | NM_001225 | CASP4 | 0.01052851  | CDS  |
| hsa-miR-143-5p    | NM_001225 | CASP4 | 0.000248963 | CDS  |
| hsa-miR-145-5p    | NM_001225 | CASP4 | 0.000127802 | CDS  |
| hsa-miR-152-3p    | NM_001225 | CASP4 | 8.25E-06    | CDS  |
| hsa-miR-153-5p    | NM_001225 | CASP4 | 0.002279852 | CDS  |
| hsa-miR-191-3p    | NM_001225 | CASP4 | 8.39E-06    | CDS  |
| hsa-miR-125a-5p   | NM_001225 | CASP4 | 0.000525684 | CDS  |
| hsa-miR-125b-2-3p | NM_001225 | CASP4 | 0.000172769 | CDS  |
| hsa-miR-127-5p    | NM_001225 | CASP4 | 0.003428258 | CDS  |
| hsa-miR-127-5p    | NM_001225 | CASP4 | 0.002303406 | CDS  |
| hsa-miR-134-3p    | NM_001225 | CASP4 | 0.003152907 | CDS  |
| hsa-miR-138-1-3p  | NM_001225 | CASP4 | 0.001122082 | CDS  |
| hsa-miR-138-1-3p  | NM_001225 | CASP4 | 0.000725653 | CDS  |
| hsa-miR-146a-3p   | NM_001225 | CASP4 | 5.70E-05    | CDS  |
| hsa-miR-149-5p    | NM_001225 | CASP4 | 0.007606361 | CDS  |
| hsa-miR-149-5p    | NM_001225 | CASP4 | 0.000860321 | CDS  |
| hsa-miR-149-3p    | NM_001225 | CASP4 | 0.006369709 | CDS  |
| hsa-miR-150-3p    | NM_001225 | CASP4 | 1.81E-05    | CDS  |
| hsa-miR-150-3p    | NM_001225 | CASP4 | 0.002292537 | 5UTR |
| hsa-miR-154-5p    | NM_001225 | CASP4 | 0.0083306   | CDS  |
| hsa-miR-154-5p    | NM_001225 | CASP4 | 0.007276623 | CDS  |
| hsa-miR-185-3p    | NM_001225 | CASP4 | 8.66E-05    | CDS  |
| hsa-miR-188-5p    | NM_001225 | CASP4 | 0.002186513 | CDS  |
| hsa-miR-188-3p    | NM_001225 | CASP4 | 0.00307967  | CDS  |
| hsa-miR-193a-5p   | NM_001225 | CASP4 | 4.32E-05    | CDS  |
| hsa-miR-193a-5p   | NM_001225 | CASP4 | 0.000470238 | CDS  |
| hsa-miR-193a-3p   | NM_001225 | CASP4 | 1.38E-05    | CDS  |
| hsa-miR-194-5p    | NM_001225 | CASP4 | 0.001301877 | CDS  |
| hsa-miR-194-5p    | NM_001225 | CASP4 | 0.000428925 | CDS  |
| hsa-miR-195-5p    | NM_001225 | CASP4 | 0.006381234 | CDS  |
| hsa-miR-206       | NM_001225 | CASP4 | 0.002868814 | CDS  |
| hsa-miR-320a-5p   | NM_001225 | CASP4 | 0.000725653 | CDS  |
| hsa-miR-320a-3p   | NM_001225 | CASP4 | 0.0218458   | CDS  |
| hsa-miR-200c-5p   | NM_001225 | CASP4 | 5.86E-05    | CDS  |
| hsa-miR-194-3p    | NM_001225 | CASP4 | 0.00098523  | CDS  |
| hsa-miR-106b-5p   | NM_001225 | CASP4 | 0.000125909 | CDS  |
| hsa-miR-106b-3p   | NM_001225 | CASP4 | 0.00307967  | CDS  |
| hsa-miR-106b-3p   | NM_001225 | CASP4 | 0.01849425  | CDS  |
| hsa-miR-29c-5p    | NM_001225 | CASP4 | 6.22E-06    | CDS  |
| hsa-miR-30c-1-3p  | NM_001225 | CASP4 | 0.004304008 | CDS  |
| hsa-miR-30c-1-3p  | NM_001225 | CASP4 | 0.005953452 | 3UTR |
| hsa-miR-302a-3p   | NM_001225 | CASP4 | 0.00017934  | CDS  |
| hsa-miR-301a-5p   | NM_001225 | CASP4 | 0.02147881  | CDS  |
| hsa-miR-99b-3p    | NM_001225 | CASP4 | 0.01017319  | CDS  |

|                 |           |       |             |     |
|-----------------|-----------|-------|-------------|-----|
| hsa-miR-99b-3p  | NM_001225 | CASP4 | 0.009782782 | CDS |
| hsa-miR-296-3p  | NM_001225 | CASP4 | 0.005208109 | CDS |
| hsa-miR-296-3p  | NM_001225 | CASP4 | 0.002868814 | CDS |
| hsa-miR-296-3p  | NM_001225 | CASP4 | 0.02114427  | CDS |
| hsa-miR-130b-5p | NM_001225 | CASP4 | 0.000605186 | CDS |
| hsa-miR-130b-3p | NM_001225 | CASP4 | 0.03971412  | CDS |
| hsa-miR-130b-3p | NM_001225 | CASP4 | 0.000647898 | CDS |
| hsa-miR-361-5p  | NM_001225 | CASP4 | 0.000742402 | CDS |
| hsa-miR-361-5p  | NM_001225 | CASP4 | 0.000137537 | CDS |
| hsa-miR-361-3p  | NM_001225 | CASP4 | 1.97E-05    | CDS |
| hsa-miR-363-3p  | NM_001225 | CASP4 | 0.000268314 | CDS |
| hsa-miR-365a-5p | NM_001225 | CASP4 | 0.001637462 | CDS |
| hsa-miR-365a-5p | NM_001225 | CASP4 | 0.000526877 | CDS |
| hsa-miR-365a-5p | NM_001225 | CASP4 | 8.66E-05    | CDS |
| hsa-miR-365b-5p | NM_001225 | CASP4 | 0.000781748 | CDS |
| hsa-miR-365b-5p | NM_001225 | CASP4 | 0.001637462 | CDS |
| hsa-miR-302b-3p | NM_001225 | CASP4 | 0.000142782 | CDS |
| hsa-miR-302b-3p | NM_001225 | CASP4 | 0.00017934  | CDS |
| hsa-miR-302c-3p | NM_001225 | CASP4 | 0.000142782 | CDS |
| hsa-miR-302c-3p | NM_001225 | CASP4 | 0.00017934  | CDS |
| hsa-miR-302d-3p | NM_001225 | CASP4 | 0.00017934  | CDS |
| hsa-miR-376c-5p | NM_001225 | CASP4 | 0.5672603   | CDS |
| hsa-miR-370-5p  | NM_001225 | CASP4 | 0.000781748 | CDS |
| hsa-miR-370-3p  | NM_001225 | CASP4 | 0.000860321 | CDS |
| hsa-miR-371a-5p | NM_001225 | CASP4 | 0.000907814 | CDS |
| hsa-miR-372-5p  | NM_001225 | CASP4 | 9.44E-06    | CDS |
| hsa-miR-376a-5p | NM_001225 | CASP4 | 0.00011745  | CDS |
| hsa-miR-376a-5p | NM_001225 | CASP4 | 0.000547919 | CDS |
| hsa-miR-377-5p  | NM_001225 | CASP4 | 8.44E-05    | CDS |
| hsa-miR-378a-5p | NM_001225 | CASP4 | 0.000922214 | CDS |
| hsa-miR-378a-5p | NM_001225 | CASP4 | 2.26E-06    | CDS |
| hsa-miR-378a-5p | NM_001225 | CASP4 | 0.002870221 | CDS |
| hsa-miR-381-5p  | NM_001225 | CASP4 | 0.000618857 | CDS |
| hsa-miR-382-5p  | NM_001225 | CASP4 | 0.005791904 | CDS |
| hsa-miR-330-3p  | NM_001225 | CASP4 | 0.000248963 | CDS |
| hsa-miR-328-5p  | NM_001225 | CASP4 | 0.001893298 | CDS |
| hsa-miR-328-5p  | NM_001225 | CASP4 | 0.000867817 | CDS |
| hsa-miR-328-5p  | NM_001225 | CASP4 | 0.000379457 | CDS |
| hsa-miR-328-3p  | NM_001225 | CASP4 | 0.004080075 | CDS |
| hsa-miR-328-3p  | NM_001225 | CASP4 | 1.38E-05    | CDS |
| hsa-miR-328-3p  | NM_001225 | CASP4 | 0.0001625   | CDS |
| hsa-miR-337-5p  | NM_001225 | CASP4 | 0.002228703 | CDS |
| hsa-miR-323a-5p | NM_001225 | CASP4 | 8.84E-05    | CDS |
| hsa-miR-151a-5p | NM_001225 | CASP4 | 0.000172777 | CDS |



|                 |           |       |             |      |
|-----------------|-----------|-------|-------------|------|
| hsa-miR-151a-3p | NM_001225 | CASP4 | 0.001474321 | CDS  |
| hsa-miR-135b-5p | NM_001225 | CASP4 | 0.000797533 | CDS  |
| hsa-miR-148b-5p | NM_001225 | CASP4 | 0.01629919  | CDS  |
| hsa-miR-331-5p  | NM_001225 | CASP4 | 0.000353786 | CDS  |
| hsa-miR-324-5p  | NM_001225 | CASP4 | 0.000131593 | CDS  |
| hsa-miR-338-3p  | NM_001225 | CASP4 | 0.000928292 | CDS  |
| hsa-miR-338-3p  | NM_001225 | CASP4 | 0.1284782   | CDS  |
| hsa-miR-339-5p  | NM_001225 | CASP4 | 7.76E-07    | CDS  |
| hsa-miR-339-3p  | NM_001225 | CASP4 | 4.82E-05    | CDS  |
| hsa-miR-133b    | NM_001225 | CASP4 | 0.002990015 | CDS  |
| hsa-miR-133b    | NM_001225 | CASP4 | 0.00037239  | CDS  |
| hsa-miR-325     | NM_001225 | CASP4 | 0.000860321 | CDS  |
| hsa-miR-345-5p  | NM_001225 | CASP4 | 0.01082276  | CDS  |
| hsa-miR-345-3p  | NM_001225 | CASP4 | 0.000860321 | CDS  |
| hsa-miR-345-3p  | NM_001225 | CASP4 | 0.000725653 | CDS  |
| hsa-miR-345-3p  | NM_001225 | CASP4 | 4.82E-05    | CDS  |
| hsa-miR-346     | NM_001225 | CASP4 | 0.000386263 | CDS  |
| hsa-miR-196b-5p | NM_001225 | CASP4 | 0.000427688 | CDS  |
| hsa-miR-196b-5p | NM_001225 | CASP4 | 0.1530227   | CDS  |
| hsa-miR-423-5p  | NM_001225 | CASP4 | 0.001482999 | CDS  |
| hsa-miR-423-3p  | NM_001225 | CASP4 | 0.000309971 | CDS  |
| hsa-miR-425-3p  | NM_001225 | CASP4 | 0.04080268  | CDS  |
| hsa-miR-20b-5p  | NM_001225 | CASP4 | 0.000125909 | CDS  |
| hsa-miR-20b-3p  | NM_001225 | CASP4 | 0.000221888 | CDS  |
| hsa-miR-431-5p  | NM_001225 | CASP4 | 3.17E-07    | CDS  |
| hsa-miR-431-3p  | NM_001225 | CASP4 | 0.001637462 | CDS  |
| hsa-miR-431-3p  | NM_001225 | CASP4 | 0.4681456   | CDS  |
| hsa-miR-329-5p  | NM_001225 | CASP4 | 0.005838581 | 5UTR |
| hsa-miR-412-3p  | NM_001225 | CASP4 | 0.000335791 | CDS  |
| hsa-miR-410-5p  | NM_001225 | CASP4 | 0.2188127   | CDS  |
| hsa-miR-485-5p  | NM_001225 | CASP4 | 0.000482834 | CDS  |
| hsa-miR-485-3p  | NM_001225 | CASP4 | 6.51E-05    | CDS  |
| hsa-miR-486-5p  | NM_001225 | CASP4 | 0.000933448 | CDS  |
| hsa-miR-487a-5p | NM_001225 | CASP4 | 0.000328221 | CDS  |
| hsa-miR-487a-5p | NM_001225 | CASP4 | 0.000530791 | CDS  |
| hsa-miR-487a-5p | NM_001225 | CASP4 | 0.000659914 | CDS  |
| hsa-miR-488-3p  | NM_001225 | CASP4 | 0.000218895 | CDS  |
| hsa-miR-490-5p  | NM_001225 | CASP4 | 0.000294115 | CDS  |
| hsa-miR-490-5p  | NM_001225 | CASP4 | 1.00E-05    | CDS  |
| hsa-miR-491-5p  | NM_001225 | CASP4 | 0.000215353 | CDS  |
| hsa-miR-491-5p  | NM_001225 | CASP4 | 0.005156117 | CDS  |
| hsa-miR-491-3p  | NM_001225 | CASP4 | 0.002295539 | CDS  |
| hsa-miR-511-5p  | NM_001225 | CASP4 | 0.00859865  | 5UTR |
| hsa-miR-511-5p  | NM_001225 | CASP4 | 0.002095427 | CDS  |

|                 |           |       |             |      |
|-----------------|-----------|-------|-------------|------|
| hsa-miR-146b-3p | NM_001225 | CASP4 | 8.39E-06    | CDS  |
| hsa-miR-146b-3p | NM_001225 | CASP4 | 0.000578367 | CDS  |
| hsa-miR-202-3p  | NM_001225 | CASP4 | 0.006369709 | 3UTR |
| hsa-miR-202-3p  | NM_001225 | CASP4 | 0.001893298 | CDS  |
| hsa-miR-493-5p  | NM_001225 | CASP4 | 5.83E-05    | CDS  |
| hsa-miR-432-5p  | NM_001225 | CASP4 | 0.000218895 | CDS  |
| hsa-miR-432-5p  | NM_001225 | CASP4 | 0.001166167 | 3UTR |
| hsa-miR-432-3p  | NM_001225 | CASP4 | 0.000836616 | CDS  |
| hsa-miR-432-3p  | NM_001225 | CASP4 | 0.001918944 | CDS  |
| hsa-miR-432-3p  | NM_001225 | CASP4 | 0.000318808 | CDS  |
| hsa-miR-494-5p  | NM_001225 | CASP4 | 0.000579714 | CDS  |
| hsa-miR-494-5p  | NM_001225 | CASP4 | 0.08934267  | CDS  |
| hsa-miR-494-5p  | NM_001225 | CASP4 | 0.01076079  | CDS  |
| hsa-miR-496     | NM_001225 | CASP4 | 8.78E-05    | CDS  |
| hsa-miR-193b-5p | NM_001225 | CASP4 | 0.004819847 | CDS  |
| hsa-miR-193b-5p | NM_001225 | CASP4 | 0.000606734 | CDS  |
| hsa-miR-193b-3p | NM_001225 | CASP4 | 1.38E-05    | CDS  |
| hsa-miR-193b-3p | NM_001225 | CASP4 | 0.00124429  | CDS  |
| hsa-miR-497-5p  | NM_001225 | CASP4 | 0.006381234 | CDS  |
| hsa-miR-497-3p  | NM_001225 | CASP4 | 0.00124429  | CDS  |
| hsa-miR-512-5p  | NM_001225 | CASP4 | 0.000907814 | CDS  |
| hsa-miR-512-5p  | NM_001225 | CASP4 | 0.006933323 | CDS  |
| hsa-miR-512-3p  | NM_001225 | CASP4 | 0.000125909 | CDS  |
| hsa-miR-512-3p  | NM_001225 | CASP4 | 0.002095427 | CDS  |
| hsa-miR-498-5p  | NM_001225 | CASP4 | 0.009782782 | CDS  |
| hsa-miR-520e-5p | NM_001225 | CASP4 | 0.03937514  | CDS  |
| hsa-miR-515-3p  | NM_001225 | CASP4 | 0.04253148  | CDS  |
| hsa-miR-519e-5p | NM_001225 | CASP4 | 0.000431619 | 5UTR |
| hsa-miR-520f-3p | NM_001225 | CASP4 | 0.01661348  | CDS  |
| hsa-miR-520a-3p | NM_001225 | CASP4 | 0.000142782 | CDS  |
| hsa-miR-525-5p  | NM_001225 | CASP4 | 0.00307967  | CDS  |
| hsa-miR-525-3p  | NM_001225 | CASP4 | 0.000131593 | CDS  |
| hsa-miR-518f-3p | NM_001225 | CASP4 | 0.002304037 | CDS  |
| hsa-miR-526a-3p | NM_001225 | CASP4 | 0.01661348  | CDS  |
| hsa-miR-520c-3p | NM_001225 | CASP4 | 5.86E-05    | CDS  |
| hsa-miR-518c-3p | NM_001225 | CASP4 | 0.002304037 | CDS  |
| hsa-miR-524-3p  | NM_001225 | CASP4 | 0.006804399 | CDS  |
| hsa-miR-524-3p  | NM_001225 | CASP4 | 0.000768445 | CDS  |
| hsa-miR-517a-3p | NM_001225 | CASP4 | 0.003858073 | CDS  |
| hsa-miR-519d-5p | NM_001225 | CASP4 | 0.002923447 | 5UTR |
| hsa-miR-519d-5p | NM_001225 | CASP4 | 0.00307967  | CDS  |
| hsa-miR-521     | NM_001225 | CASP4 | 0.000131593 | CDS  |
| hsa-miR-520d-3p | NM_001225 | CASP4 | 0.000581447 | CDS  |
| hsa-miR-520d-3p | NM_001225 | CASP4 | 5.86E-05    | CDS  |

|                   |           |       |             |      |
|-------------------|-----------|-------|-------------|------|
| hsa-miR-520d-3p   | NM_001225 | CASP4 | 0.000171579 | CDS  |
| hsa-miR-520d-3p   | NM_001225 | CASP4 | 0.005791904 | CDS  |
| hsa-miR-517b-3p   | NM_001225 | CASP4 | 0.003858073 | CDS  |
| hsa-miR-516b-5p   | NM_001225 | CASP4 | 0.0357771   | CDS  |
| hsa-miR-516b-3p   | NM_001225 | CASP4 | 0.19092     | CDS  |
| hsa-miR-518e-3p   | NM_001225 | CASP4 | 0.000131593 | CDS  |
| hsa-miR-518a-5p   | NM_001225 | CASP4 | 0.002923447 | 5UTR |
| hsa-miR-517c-3p   | NM_001225 | CASP4 | 0.003858073 | CDS  |
| hsa-miR-522-3p    | NM_001225 | CASP4 | 4.20E-05    | CDS  |
| hsa-miR-527       | NM_001225 | CASP4 | 0.002923447 | 5UTR |
| hsa-miR-516a-3p   | NM_001225 | CASP4 | 0.19092     | CDS  |
| hsa-miR-499a-3p   | NM_001225 | CASP4 | 0.2003249   | 3UTR |
| hsa-miR-501-5p    | NM_001225 | CASP4 | 0.01515751  | CDS  |
| hsa-miR-501-5p    | NM_001225 | CASP4 | 0.000585775 | CDS  |
| hsa-miR-502-3p    | NM_001225 | CASP4 | 4.70E-05    | CDS  |
| hsa-miR-502-3p    | NM_001225 | CASP4 | 2.20E-05    | CDS  |
| hsa-miR-503-5p    | NM_001225 | CASP4 | 0.006381234 | CDS  |
| hsa-miR-503-5p    | NM_001225 | CASP4 | 0.000140068 | 5UTR |
| hsa-miR-504-5p    | NM_001225 | CASP4 | 0.002877047 | CDS  |
| hsa-miR-504-5p    | NM_001225 | CASP4 | 0.000429816 | CDS  |
| hsa-miR-504-3p    | NM_001225 | CASP4 | 0.005953452 | 3UTR |
| hsa-miR-504-3p    | NM_001225 | CASP4 | 0.001893298 | CDS  |
| hsa-miR-505-5p    | NM_001225 | CASP4 | 0.002868814 | CDS  |
| hsa-miR-505-5p    | NM_001225 | CASP4 | 0.002698706 | CDS  |
| hsa-miR-508-5p    | NM_001225 | CASP4 | 0.02114427  | CDS  |
| hsa-miR-508-3p    | NM_001225 | CASP4 | 0.00558577  | CDS  |
| hsa-miR-509-3p    | NM_001225 | CASP4 | 4.82E-05    | CDS  |
| hsa-miR-532-3p    | NM_001225 | CASP4 | 0.002973746 | CDS  |
| hsa-miR-455-3p    | NM_001225 | CASP4 | 2.70E-05    | CDS  |
| hsa-miR-376a-2-5p | NM_001225 | CASP4 | 0.000547919 | CDS  |
| hsa-miR-487b-5p   | NM_001225 | CASP4 | 0.000659914 | CDS  |
| hsa-miR-551a      | NM_001225 | CASP4 | 9.12E-06    | CDS  |
| hsa-miR-552-3p    | NM_001225 | CASP4 | 0.000190781 | CDS  |
| hsa-miR-552-3p    | NM_001225 | CASP4 | 0.00104551  | CDS  |
| hsa-miR-554       | NM_001225 | CASP4 | 0.000933448 | CDS  |
| hsa-miR-554       | NM_001225 | CASP4 | 7.30E-05    | CDS  |
| hsa-miR-92b-5p    | NM_001225 | CASP4 | 0.00023335  | CDS  |
| hsa-miR-92b-3p    | NM_001225 | CASP4 | 0.000748699 | CDS  |
| hsa-miR-556-5p    | NM_001225 | CASP4 | 0.08247515  | CDS  |
| hsa-miR-557       | NM_001225 | CASP4 | 7.53E-05    | CDS  |
| hsa-miR-558       | NM_001225 | CASP4 | 0.000240069 | CDS  |
| hsa-miR-562       | NM_001225 | CASP4 | 0.00094399  | CDS  |
| hsa-miR-567       | NM_001225 | CASP4 | 2.27E-06    | CDS  |
| hsa-miR-551b-3p   | NM_001225 | CASP4 | 0.01082276  | CDS  |

|                 |           |       |             |      |
|-----------------|-----------|-------|-------------|------|
| hsa-miR-572     | NM_001225 | CASP4 | 8.39E-06    | CDS  |
| hsa-miR-572     | NM_001225 | CASP4 | 0.01629919  | CDS  |
| hsa-miR-572     | NM_001225 | CASP4 | 0.00275918  | CDS  |
| hsa-miR-576-5p  | NM_001225 | CASP4 | 0.007087661 | CDS  |
| hsa-miR-578     | NM_001225 | CASP4 | 0.000179002 | CDS  |
| hsa-miR-579-5p  | NM_001225 | CASP4 | 0.002981617 | CDS  |
| hsa-miR-584-5p  | NM_001225 | CASP4 | 0.000568399 | CDS  |
| hsa-miR-584-5p  | NM_001225 | CASP4 | 0.002981617 | CDS  |
| hsa-miR-584-3p  | NM_001225 | CASP4 | 0.00013726  | CDS  |
| hsa-miR-587     | NM_001225 | CASP4 | 0.01557019  | 5UTR |
| hsa-miR-589-3p  | NM_001225 | CASP4 | 0.01204711  | CDS  |
| hsa-miR-589-3p  | NM_001225 | CASP4 | 0.1092693   | CDS  |
| hsa-miR-550a-3p | NM_001225 | CASP4 | 0.00275918  | CDS  |
| hsa-miR-593-5p  | NM_001225 | CASP4 | 0.000427548 | CDS  |
| hsa-miR-593-5p  | NM_001225 | CASP4 | 4.82E-05    | CDS  |
| hsa-miR-595     | NM_001225 | CASP4 | 0.004667567 | CDS  |
| hsa-miR-597-3p  | NM_001225 | CASP4 | 0.001496186 | CDS  |
| hsa-miR-598-5p  | NM_001225 | CASP4 | 9.92E-06    | CDS  |
| hsa-miR-601     | NM_001225 | CASP4 | 2.93E-05    | CDS  |
| hsa-miR-601     | NM_001225 | CASP4 | 0.000234425 | CDS  |
| hsa-miR-602     | NM_001225 | CASP4 | 6.27E-05    | CDS  |
| hsa-miR-605-5p  | NM_001225 | CASP4 | 0.002982281 | CDS  |
| hsa-miR-608     | NM_001225 | CASP4 | 0.004446168 | CDS  |
| hsa-miR-608     | NM_001225 | CASP4 | 0.01804151  | CDS  |
| hsa-miR-609     | NM_001225 | CASP4 | 0.001332125 | CDS  |
| hsa-miR-610     | NM_001225 | CASP4 | 0.00215005  | CDS  |
| hsa-miR-610     | NM_001225 | CASP4 | 0.007669794 | CDS  |
| hsa-miR-611     | NM_001225 | CASP4 | 0.000275604 | CDS  |
| hsa-miR-612     | NM_001225 | CASP4 | 0.000140068 | 5UTR |
| hsa-miR-612     | NM_001225 | CASP4 | 0.000230217 | CDS  |
| hsa-miR-613     | NM_001225 | CASP4 | 0.005593335 | CDS  |
| hsa-miR-615-5p  | NM_001225 | CASP4 | 0.000482834 | CDS  |
| hsa-miR-616-3p  | NM_001225 | CASP4 | 0.008172057 | CDS  |
| hsa-miR-616-3p  | NM_001225 | CASP4 | 0.000725653 | CDS  |
| hsa-miR-616-3p  | NM_001225 | CASP4 | 0.005060872 | 3UTR |
| hsa-miR-619-3p  | NM_001225 | CASP4 | 0.000155497 | CDS  |
| hsa-miR-619-3p  | NM_001225 | CASP4 | 4.84E-05    | CDS  |
| hsa-miR-621     | NM_001225 | CASP4 | 0.000427688 | CDS  |
| hsa-miR-622     | NM_001225 | CASP4 | 0.00059852  | CDS  |
| hsa-miR-623     | NM_001225 | CASP4 | 1.97E-05    | CDS  |
| hsa-miR-623     | NM_001225 | CASP4 | 0.003175839 | CDS  |
| hsa-miR-623     | NM_001225 | CASP4 | 0.001140635 | CDS  |
| hsa-miR-624-5p  | NM_001225 | CASP4 | 0.002990015 | CDS  |
| hsa-miR-631     | NM_001225 | CASP4 | 0.003441311 | CDS  |

|                 |           |       |             |      |
|-----------------|-----------|-------|-------------|------|
| hsa-miR-33b-3p  | NM_001225 | CASP4 | 4.82E-05    | CDS  |
| hsa-miR-632     | NM_001225 | CASP4 | 0.002462912 | CDS  |
| hsa-miR-637     | NM_001225 | CASP4 | 0.000604446 | CDS  |
| hsa-miR-637     | NM_001225 | CASP4 | 0.000275604 | CDS  |
| hsa-miR-637     | NM_001225 | CASP4 | 0.005208109 | 3UTR |
| hsa-miR-638     | NM_001225 | CASP4 | 0.002868814 | CDS  |
| hsa-miR-639     | NM_001225 | CASP4 | 0.003175839 | CDS  |
| hsa-miR-639     | NM_001225 | CASP4 | 0.0218458   | 3UTR |
| hsa-miR-642a-5p | NM_001225 | CASP4 | 0.002462912 | CDS  |
| hsa-miR-644a    | NM_001225 | CASP4 | 0.01049294  | CDS  |
| hsa-miR-647     | NM_001225 | CASP4 | 0.01412757  | 3UTR |
| hsa-miR-648     | NM_001225 | CASP4 | 0.009782782 | CDS  |
| hsa-miR-650     | NM_001225 | CASP4 | 2.56E-05    | CDS  |
| hsa-miR-652-5p  | NM_001225 | CASP4 | 5.83E-05    | CDS  |
| hsa-miR-548d-3p | NM_001225 | CASP4 | 1.00E-05    | CDS  |
| hsa-miR-661     | NM_001225 | CASP4 | 0.002429208 | CDS  |
| hsa-miR-661     | NM_001225 | CASP4 | 9.07E-06    | CDS  |
| hsa-miR-662     | NM_001225 | CASP4 | 0.00307967  | CDS  |
| hsa-miR-663a    | NM_001225 | CASP4 | 7.32E-05    | CDS  |
| hsa-miR-663a    | NM_001225 | CASP4 | 0.002517568 | CDS  |
| hsa-miR-656-5p  | NM_001225 | CASP4 | 0.2093077   | 3UTR |
| hsa-miR-549a-5p | NM_001225 | CASP4 | 2.59E-05    | CDS  |
| hsa-miR-657     | NM_001225 | CASP4 | 0.000248963 | CDS  |
| hsa-miR-657     | NM_001225 | CASP4 | 0.000579714 | CDS  |
| hsa-miR-659-3p  | NM_001225 | CASP4 | 0.000860321 | CDS  |
| hsa-miR-659-3p  | NM_001225 | CASP4 | 0.01889378  | 3UTR |
| hsa-miR-659-3p  | NM_001225 | CASP4 | 0.000155666 | CDS  |
| hsa-miR-660-3p  | NM_001225 | CASP4 | 5.83E-05    | CDS  |
| hsa-miR-758-5p  | NM_001225 | CASP4 | 0.0239871   | CDS  |
| hsa-miR-671-5p  | NM_001225 | CASP4 | 0.000661315 | 3UTR |
| hsa-miR-671-5p  | NM_001225 | CASP4 | 4.05E-05    | 5UTR |
| hsa-miR-671-3p  | NM_001225 | CASP4 | 0.002870221 | CDS  |
| hsa-miR-671-3p  | NM_001225 | CASP4 | 0.01114662  | CDS  |
| hsa-miR-671-3p  | NM_001225 | CASP4 | 8.39E-06    | CDS  |
| hsa-miR-668-5p  | NM_001225 | CASP4 | 0.00017934  | CDS  |
| hsa-miR-668-5p  | NM_001225 | CASP4 | 4.32E-05    | CDS  |
| hsa-miR-668-3p  | NM_001225 | CASP4 | 9.07E-06    | CDS  |
| hsa-miR-767-5p  | NM_001225 | CASP4 | 0.001656376 | CDS  |
| hsa-miR-767-3p  | NM_001225 | CASP4 | 3.30E-05    | CDS  |
| hsa-miR-1224-5p | NM_001225 | CASP4 | 0.002526276 | CDS  |
| hsa-miR-1224-5p | NM_001225 | CASP4 | 0.001321211 | CDS  |
| hsa-miR-1224-3p | NM_001225 | CASP4 | 0.00307967  | CDS  |
| hsa-miR-320b    | NM_001225 | CASP4 | 0.0218458   | CDS  |
| hsa-miR-320c    | NM_001225 | CASP4 | 0.0218458   | 3UTR |

|                 |           |       |             |      |
|-----------------|-----------|-------|-------------|------|
| hsa-miR-320c    | NM_001225 | CASP4 | 0.2093077   | 3UTR |
| hsa-miR-1296-5p | NM_001225 | CASP4 | 0.01597706  | CDS  |
| hsa-miR-1296-5p | NM_001225 | CASP4 | 0.000141499 | CDS  |
| hsa-miR-1296-5p | NM_001225 | CASP4 | 0.000142782 | CDS  |
| hsa-miR-1468-5p | NM_001225 | CASP4 | 0.000645829 | CDS  |
| hsa-miR-1323    | NM_001225 | CASP4 | 0.03691652  | CDS  |
| hsa-miR-1271-3p | NM_001225 | CASP4 | 0.01629919  | CDS  |
| hsa-miR-1271-3p | NM_001225 | CASP4 | 0.000142782 | CDS  |
| hsa-miR-1271-3p | NM_001225 | CASP4 | 0.04209539  | CDS  |
| hsa-miR-1301-5p | NM_001225 | CASP4 | 1.47E-05    | CDS  |
| hsa-miR-1301-3p | NM_001225 | CASP4 | 1.81E-05    | CDS  |
| hsa-miR-449c-5p | NM_001225 | CASP4 | 0.00104551  | CDS  |
| hsa-miR-769-5p  | NM_001225 | CASP4 | 0.002973746 | CDS  |
| hsa-miR-769-5p  | NM_001225 | CASP4 | 0.02607847  | CDS  |
| hsa-miR-769-3p  | NM_001225 | CASP4 | 0.01091542  | CDS  |
| hsa-miR-769-3p  | NM_001225 | CASP4 | 0.001021701 | CDS  |
| hsa-miR-766-5p  | NM_001225 | CASP4 | 8.44E-05    | CDS  |
| hsa-miR-766-5p  | NM_001225 | CASP4 | 0.005953452 | 3UTR |
| hsa-miR-766-3p  | NM_001225 | CASP4 | 0.002923447 | 5UTR |
| hsa-miR-762     | NM_001225 | CASP4 | 0.005598497 | 3UTR |
| hsa-miR-670-5p  | NM_001225 | CASP4 | 0.00059852  | CDS  |
| hsa-miR-1298-5p | NM_001225 | CASP4 | 0.000585775 | CDS  |
| hsa-miR-2113    | NM_001225 | CASP4 | 0.000148032 | CDS  |
| hsa-miR-764     | NM_001225 | CASP4 | 9.29E-05    | CDS  |
| hsa-miR-764     | NM_001225 | CASP4 | 0.000961128 | CDS  |
| hsa-miR-765     | NM_001225 | CASP4 | 0.002811797 | CDS  |
| hsa-miR-675-5p  | NM_001225 | CASP4 | 0.000369195 | CDS  |
| hsa-miR-675-3p  | NM_001225 | CASP4 | 1.75E-05    | CDS  |
| hsa-miR-298     | NM_001225 | CASP4 | 0.000536431 | CDS  |
| hsa-miR-300     | NM_001225 | CASP4 | 9.11E-05    | CDS  |
| hsa-miR-874-3p  | NM_001225 | CASP4 | 1.28E-05    | CDS  |
| hsa-miR-874-3p  | NM_001225 | CASP4 | 0.001365539 | CDS  |
| hsa-miR-890     | NM_001225 | CASP4 | 0.0469961   | 5UTR |
| hsa-miR-892b    | NM_001225 | CASP4 | 0.000317383 | CDS  |
| hsa-miR-892b    | NM_001225 | CASP4 | 0.007606361 | CDS  |
| hsa-miR-541-5p  | NM_001225 | CASP4 | 0.000651958 | CDS  |
| hsa-miR-541-5p  | NM_001225 | CASP4 | 0.03313369  | CDS  |
| hsa-miR-541-3p  | NM_001225 | CASP4 | 1.41E-05    | CDS  |
| hsa-miR-541-3p  | NM_001225 | CASP4 | 0.008659816 | CDS  |
| hsa-miR-147b-3p | NM_001225 | CASP4 | 0.005709682 | CDS  |
| hsa-miR-744-5p  | NM_001225 | CASP4 | 0.005598497 | 3UTR |
| hsa-miR-744-5p  | NM_001225 | CASP4 | 2.20E-05    | CDS  |
| hsa-miR-885-3p  | NM_001225 | CASP4 | 0.002868814 | CDS  |
| hsa-miR-885-3p  | NM_001225 | CASP4 | 0.00011745  | CDS  |

|                  |           |       |             |      |
|------------------|-----------|-------|-------------|------|
| hsa-miR-877-5p   | NM_001225 | CASP4 | 0.001321211 | CDS  |
| hsa-miR-877-3p   | NM_001225 | CASP4 | 0.3628757   | CDS  |
| hsa-miR-887-3p   | NM_001225 | CASP4 | 0.000215353 | CDS  |
| hsa-miR-665      | NM_001225 | CASP4 | 0.000282051 | CDS  |
| hsa-miR-665      | NM_001225 | CASP4 | 2.14E-05    | CDS  |
| hsa-miR-873-3p   | NM_001225 | CASP4 | 7.63E-06    | CDS  |
| hsa-miR-873-3p   | NM_001225 | CASP4 | 0.001160472 | CDS  |
| hsa-miR-543      | NM_001225 | CASP4 | 7.32E-05    | CDS  |
| hsa-miR-374b-3p  | NM_001225 | CASP4 | 0.2003249   | 3UTR |
| hsa-miR-760      | NM_001225 | CASP4 | 0.000309971 | CDS  |
| hsa-miR-301b-5p  | NM_001225 | CASP4 | 5.70E-05    | CDS  |
| hsa-miR-216b-5p  | NM_001225 | CASP4 | 1.13E-06    | CDS  |
| hsa-miR-920      | NM_001225 | CASP4 | 7.63E-06    | CDS  |
| hsa-miR-920      | NM_001225 | CASP4 | 0.002811797 | CDS  |
| hsa-miR-921      | NM_001225 | CASP4 | 0.002314096 | CDS  |
| hsa-miR-924      | NM_001225 | CASP4 | 0.01085729  | CDS  |
| hsa-miR-924      | NM_001225 | CASP4 | 0.000482834 | CDS  |
| hsa-miR-924      | NM_001225 | CASP4 | 0.001600576 | CDS  |
| hsa-miR-509-3-5p | NM_001225 | CASP4 | 1.81E-05    | CDS  |
| hsa-miR-933      | NM_001225 | CASP4 | 0.000266327 | CDS  |
| hsa-miR-933      | NM_001225 | CASP4 | 0.001142641 | CDS  |
| hsa-miR-935      | NM_001225 | CASP4 | 0.001560491 | CDS  |
| hsa-miR-937-5p   | NM_001225 | CASP4 | 0.006276804 | 3UTR |
| hsa-miR-937-5p   | NM_001225 | CASP4 | 0.002868814 | CDS  |
| hsa-miR-937-5p   | NM_001225 | CASP4 | 0.004446168 | CDS  |
| hsa-miR-937-3p   | NM_001225 | CASP4 | 8.36E-06    | CDS  |
| hsa-miR-938      | NM_001225 | CASP4 | 9.07E-06    | CDS  |
| hsa-miR-939-3p   | NM_001225 | CASP4 | 0.002982281 | CDS  |
| hsa-miR-941      | NM_001225 | CASP4 | 0.003677598 | CDS  |
| hsa-miR-943      | NM_001225 | CASP4 | 0.000748699 | CDS  |
| hsa-miR-1178-5p  | NM_001225 | CASP4 | 0.000203446 | CDS  |
| hsa-miR-1180-5p  | NM_001225 | CASP4 | 9.12E-06    | CDS  |
| hsa-miR-1180-3p  | NM_001225 | CASP4 | 0.003929355 | CDS  |
| hsa-miR-1180-3p  | NM_001225 | CASP4 | 0.000883504 | CDS  |
| hsa-miR-1181     | NM_001225 | CASP4 | 2.20E-05    | CDS  |
| hsa-miR-1182     | NM_001225 | CASP4 | 0.005208109 | 3UTR |
| hsa-miR-1182     | NM_001225 | CASP4 | 0.001893298 | CDS  |
| hsa-miR-1184     | NM_001225 | CASP4 | 0.01923861  | 3UTR |
| hsa-miR-1184     | NM_001225 | CASP4 | 1.81E-05    | CDS  |
| hsa-miR-1225-3p  | NM_001225 | CASP4 | 0.007669794 | CDS  |
| hsa-miR-1226-5p  | NM_001225 | CASP4 | 7.53E-05    | CDS  |
| hsa-miR-1226-3p  | NM_001225 | CASP4 | 0.000614096 | CDS  |
| hsa-miR-1227-5p  | NM_001225 | CASP4 | 0.004418741 | CDS  |
| hsa-miR-1227-3p  | NM_001225 | CASP4 | 0.3503675   | CDS  |

|                 |           |       |             |      |
|-----------------|-----------|-------|-------------|------|
| hsa-miR-1228-5p | NM_001225 | CASP4 | 0.000867817 | CDS  |
| hsa-miR-1229-5p | NM_001225 | CASP4 | 0.001893298 | CDS  |
| hsa-miR-1231    | NM_001225 | CASP4 | 0.000224756 | 5UTR |
| hsa-miR-1231    | NM_001225 | CASP4 | 0.008811596 | CDS  |
| hsa-miR-1233-5p | NM_001225 | CASP4 | 0.2935726   | CDS  |
| hsa-miR-1233-3p | NM_001225 | CASP4 | 5.71E-05    | 5UTR |
| hsa-miR-1236-3p | NM_001225 | CASP4 | 0.000293966 | CDS  |
| hsa-miR-1236-3p | NM_001225 | CASP4 | 0.01403179  | CDS  |
| hsa-miR-1237-5p | NM_001225 | CASP4 | 0.000427688 | CDS  |
| hsa-miR-1237-5p | NM_001225 | CASP4 | 2.56E-05    | CDS  |
| hsa-miR-1237-3p | NM_001225 | CASP4 | 8.36E-06    | CDS  |
| hsa-miR-1238-5p | NM_001225 | CASP4 | 0.006073437 | CDS  |
| hsa-miR-1200    | NM_001225 | CASP4 | 0.000922214 | CDS  |
| hsa-miR-1202    | NM_001225 | CASP4 | 0.00859865  | 5UTR |
| hsa-miR-1202    | NM_001225 | CASP4 | 0.000328221 | CDS  |
| hsa-miR-1203    | NM_001225 | CASP4 | 0.000127802 | CDS  |
| hsa-miR-1203    | NM_001225 | CASP4 | 0.002150872 | CDS  |
| hsa-miR-663b    | NM_001225 | CASP4 | 0.000318808 | CDS  |
| hsa-miR-663b    | NM_001225 | CASP4 | 0.03444711  | 5UTR |
| hsa-miR-1204    | NM_001225 | CASP4 | 0.000328221 | CDS  |
| hsa-miR-1205    | NM_001225 | CASP4 | 0.000752854 | CDS  |
| hsa-miR-1205    | NM_001225 | CASP4 | 0.003175839 | CDS  |
| hsa-miR-1207-5p | NM_001225 | CASP4 | 0.000155666 | CDS  |
| hsa-miR-1207-5p | NM_001225 | CASP4 | 0.1546664   | CDS  |
| hsa-miR-1207-5p | NM_001225 | CASP4 | 0.006538049 | CDS  |
| hsa-miR-1285-5p | NM_001225 | CASP4 | 0.001652899 | CDS  |
| hsa-miR-1285-3p | NM_001225 | CASP4 | 3.30E-05    | CDS  |
| hsa-miR-1286    | NM_001225 | CASP4 | 1.82E-05    | CDS  |
| hsa-miR-1287-5p | NM_001225 | CASP4 | 0.000933448 | CDS  |
| hsa-miR-1287-3p | NM_001225 | CASP4 | 0.001371415 | CDS  |
| hsa-miR-1289    | NM_001225 | CASP4 | 0.04253148  | CDS  |
| hsa-miR-1291    | NM_001225 | CASP4 | 0.0151755   | CDS  |
| hsa-miR-1293    | NM_001225 | CASP4 | 0.000152731 | CDS  |
| hsa-miR-1295a   | NM_001225 | CASP4 | 0.000781748 | CDS  |
| hsa-miR-1299    | NM_001225 | CASP4 | 0.006933323 | CDS  |
| hsa-miR-1303    | NM_001225 | CASP4 | 0.03057205  | CDS  |
| hsa-miR-1304-5p | NM_001225 | CASP4 | 0.000928292 | CDS  |
| hsa-miR-1304-3p | NM_001225 | CASP4 | 0.000706898 | CDS  |
| hsa-miR-1247-5p | NM_001225 | CASP4 | 0.000188063 | CDS  |
| hsa-miR-1247-3p | NM_001225 | CASP4 | 5.83E-05    | CDS  |
| hsa-miR-1249-5p | NM_001225 | CASP4 | 0.002284785 | CDS  |
| hsa-miR-1249-3p | NM_001225 | CASP4 | 0.000725653 | CDS  |
| hsa-miR-1250-5p | NM_001225 | CASP4 | 0.000369195 | CDS  |
| hsa-miR-1250-5p | NM_001225 | CASP4 | 0.001671195 | 5UTR |



|                    |           |       |             |      |
|--------------------|-----------|-------|-------------|------|
| hsa-miR-1250-5p    | NM_001225 | CASP4 | 2.78E-05    | CDS  |
| hsa-miR-1250-5p    | NM_001225 | CASP4 | 0.01412757  | 3UTR |
| hsa-miR-1251-3p    | NM_001225 | CASP4 | 0.003273847 | CDS  |
| hsa-miR-1253       | NM_001225 | CASP4 | 0.02628273  | CDS  |
| hsa-miR-1257       | NM_001225 | CASP4 | 0.000215353 | CDS  |
| hsa-miR-1260a      | NM_001225 | CASP4 | 0.003175839 | CDS  |
| hsa-miR-1261       | NM_001225 | CASP4 | 0.000556588 | CDS  |
| hsa-miR-1262       | NM_001225 | CASP4 | 0.01800674  | CDS  |
| hsa-miR-1265       | NM_001225 | CASP4 | 4.39E-05    | CDS  |
| hsa-miR-1266-5p    | NM_001225 | CASP4 | 0.00307967  | CDS  |
| hsa-miR-1266-5p    | NM_001225 | CASP4 | 0.000907814 | CDS  |
| hsa-miR-1268a      | NM_001225 | CASP4 | 0.005546619 | CDS  |
| hsa-miR-1270       | NM_001225 | CASP4 | 0.157008    | CDS  |
| hsa-miR-1270       | NM_001225 | CASP4 | 0.000671792 | CDS  |
| hsa-miR-1275       | NM_001225 | CASP4 | 2.52E-05    | 5UTR |
| hsa-miR-1275       | NM_001225 | CASP4 | 0.005208109 | 3UTR |
| hsa-miR-1276       | NM_001225 | CASP4 | 0.01085729  | CDS  |
| hsa-miR-302f       | NM_001225 | CASP4 | 0.00017934  | CDS  |
| hsa-miR-1281       | NM_001225 | CASP4 | 0.3503675   | CDS  |
| hsa-miR-1288-3p    | NM_001225 | CASP4 | 0.000709764 | CDS  |
| hsa-miR-1288-3p    | NM_001225 | CASP4 | 0.000918216 | CDS  |
| hsa-miR-1255b-5p   | NM_001225 | CASP4 | 0.005968974 | CDS  |
| hsa-miR-1255b-2-3p | NM_001225 | CASP4 | 0.001365539 | CDS  |
| hsa-miR-1306-3p    | NM_001225 | CASP4 | 0.000748699 | CDS  |
| hsa-miR-1306-3p    | NM_001225 | CASP4 | 0.000174181 | CDS  |
| hsa-miR-1307-3p    | NM_001225 | CASP4 | 0.003209116 | CDS  |
| hsa-miR-1307-3p    | NM_001225 | CASP4 | 2.26E-06    | CDS  |
| hsa-miR-1307-3p    | NM_001225 | CASP4 | 0.01227059  | CDS  |
| hsa-miR-1471       | NM_001225 | CASP4 | 0.02503297  | CDS  |
| hsa-miR-1538       | NM_001225 | CASP4 | 8.39E-06    | CDS  |
| hsa-miR-1538       | NM_001225 | CASP4 | 0.007399047 | CDS  |
| hsa-miR-1539       | NM_001225 | CASP4 | 0.002295539 | CDS  |
| hsa-miR-1539       | NM_001225 | CASP4 | 0.002877047 | CDS  |
| hsa-miR-1825       | NM_001225 | CASP4 | 0.002870221 | CDS  |
| hsa-miR-1827       | NM_001225 | CASP4 | 0.01506736  | CDS  |
| hsa-miR-1827       | NM_001225 | CASP4 | 0.004269467 | CDS  |
| hsa-miR-1908-3p    | NM_001225 | CASP4 | 2.83E-05    | CDS  |
| hsa-miR-1908-3p    | NM_001225 | CASP4 | 0.001474321 | CDS  |
| hsa-miR-1909-5p    | NM_001225 | CASP4 | 0.01128548  | CDS  |
| hsa-miR-1909-3p    | NM_001225 | CASP4 | 0.02503297  | CDS  |
| hsa-miR-1909-3p    | NM_001225 | CASP4 | 0.000256036 | CDS  |
| hsa-miR-1910-3p    | NM_001225 | CASP4 | 0.1524418   | CDS  |
| hsa-miR-1911-5p    | NM_001225 | CASP4 | 0.01128548  | CDS  |
| hsa-miR-1911-3p    | NM_001225 | CASP4 | 0.003677598 | CDS  |

|                 |           |       |             |      |
|-----------------|-----------|-------|-------------|------|
| hsa-miR-1912-5p | NM_001225 | CASP4 | 0.003209116 | CDS  |
| hsa-miR-1912-5p | NM_001225 | CASP4 | 0.09077832  | CDS  |
| hsa-miR-1912-3p | NM_001225 | CASP4 | 0.000837243 | CDS  |
| hsa-miR-1913    | NM_001225 | CASP4 | 0.000155947 | CDS  |
| hsa-miR-1914-3p | NM_001225 | CASP4 | 0.000768445 | CDS  |
| hsa-miR-1914-3p | NM_001225 | CASP4 | 0.01106304  | CDS  |
| hsa-miR-1914-3p | NM_001225 | CASP4 | 0.001249294 | CDS  |
| hsa-miR-1915-5p | NM_001225 | CASP4 | 0.002043339 | CDS  |
| hsa-miR-1915-5p | NM_001225 | CASP4 | 0.001850304 | 5UTR |
| hsa-miR-1972    | NM_001225 | CASP4 | 0.001474321 | CDS  |
| hsa-miR-1972    | NM_001225 | CASP4 | 0.000587308 | CDS  |
| hsa-miR-1972    | NM_001225 | CASP4 | 2.78E-05    | CDS  |
| hsa-miR-1976    | NM_001225 | CASP4 | 0.001862046 | CDS  |
| hsa-miR-2110    | NM_001225 | CASP4 | 3.08E-05    | 5UTR |
| hsa-miR-2116-5p | NM_001225 | CASP4 | 0.00720588  | CDS  |
| hsa-miR-2116-3p | NM_001225 | CASP4 | 5.83E-05    | CDS  |
| hsa-miR-2276-5p | NM_001225 | CASP4 | 0.000102933 | 5UTR |
| hsa-miR-2277-5p | NM_001225 | CASP4 | 0.006819084 | 3UTR |
| hsa-miR-2277-3p | NM_001225 | CASP4 | 2.83E-05    | CDS  |
| hsa-miR-2278    | NM_001225 | CASP4 | 0.002868814 | CDS  |
| hsa-miR-2681-5p | NM_001225 | CASP4 | 0.002731967 | CDS  |
| hsa-miR-2681-5p | NM_001225 | CASP4 | 0.00011745  | CDS  |
| hsa-miR-2682-3p | NM_001225 | CASP4 | 8.39E-06    | CDS  |
| hsa-miR-711     | NM_001225 | CASP4 | 0.003143502 | CDS  |
| hsa-miR-718     | NM_001225 | CASP4 | 0.000323006 | CDS  |
| hsa-miR-2861    | NM_001225 | CASP4 | 0.002150872 | CDS  |
| hsa-miR-2861    | NM_001225 | CASP4 | 3.43E-05    | CDS  |
| hsa-miR-3120-5p | NM_001225 | CASP4 | 0.002982281 | CDS  |
| hsa-miR-3122    | NM_001225 | CASP4 | 0.000578367 | CDS  |
| hsa-miR-3125    | NM_001225 | CASP4 | 0.2188127   | CDS  |
| hsa-miR-3125    | NM_001225 | CASP4 | 0.000190781 | CDS  |
| hsa-miR-3126-5p | NM_001225 | CASP4 | 0.000275604 | CDS  |
| hsa-miR-3126-3p | NM_001225 | CASP4 | 0.04342061  | CDS  |
| hsa-miR-3127-5p | NM_001225 | CASP4 | 8.66E-05    | CDS  |
| hsa-miR-3127-3p | NM_001225 | CASP4 | 0.003175839 | CDS  |
| hsa-miR-3130-5p | NM_001225 | CASP4 | 0.000614096 | CDS  |
| hsa-miR-3131    | NM_001225 | CASP4 | 0.000883504 | CDS  |
| hsa-miR-3131    | NM_001225 | CASP4 | 0.000122406 | CDS  |
| hsa-miR-3132    | NM_001225 | CASP4 | 0.000937182 | 5UTR |
| hsa-miR-3132    | NM_001225 | CASP4 | 0.01128548  | CDS  |
| hsa-miR-378b    | NM_001225 | CASP4 | 4.93E-05    | CDS  |
| hsa-miR-3135a   | NM_001225 | CASP4 | 0.001142641 | CDS  |
| hsa-miR-3135a   | NM_001225 | CASP4 | 0.000583799 | CDS  |
| hsa-miR-3136-5p | NM_001225 | CASP4 | 0.000748699 | CDS  |

|                  |           |       |             |      |
|------------------|-----------|-------|-------------|------|
| hsa-miR-3137     | NM_001225 | CASP4 | 4.61E-06    | CDS  |
| hsa-miR-548t-3p  | NM_001225 | CASP4 | 0.002981617 | CDS  |
| hsa-miR-3141     | NM_001225 | CASP4 | 0.005208109 | CDS  |
| hsa-miR-3143     | NM_001225 | CASP4 | 0.1095843   | CDS  |
| hsa-miR-3147     | NM_001225 | CASP4 | 4.34E-05    | CDS  |
| hsa-miR-3147     | NM_001225 | CASP4 | 0.000867817 | CDS  |
| hsa-miR-548v     | NM_001225 | CASP4 | 1.00E-05    | CDS  |
| hsa-miR-3150a-3p | NM_001225 | CASP4 | 0.04674126  | 5UTR |
| hsa-miR-3151-5p  | NM_001225 | CASP4 | 4.34E-05    | CDS  |
| hsa-miR-3151-3p  | NM_001225 | CASP4 | 1.38E-05    | CDS  |
| hsa-miR-3152-5p  | NM_001225 | CASP4 | 0.000102933 | 5UTR |
| hsa-miR-3153     | NM_001225 | CASP4 | 0.000556588 | CDS  |
| hsa-miR-3154     | NM_001225 | CASP4 | 0.006369709 | 3UTR |
| hsa-miR-3154     | NM_001225 | CASP4 | 0.000592024 | CDS  |
| hsa-miR-3155a    | NM_001225 | CASP4 | 0.001474321 | CDS  |
| hsa-miR-3155a    | NM_001225 | CASP4 | 0.002981617 | CDS  |
| hsa-miR-3156-5p  | NM_001225 | CASP4 | 0.0357771   | CDS  |
| hsa-miR-3156-3p  | NM_001225 | CASP4 | 0.001140635 | CDS  |
| hsa-miR-3157-5p  | NM_001225 | CASP4 | 0.002517568 | CDS  |
| hsa-miR-3158-5p  | NM_001225 | CASP4 | 0.001301877 | CDS  |
| hsa-miR-3158-5p  | NM_001225 | CASP4 | 0.000127802 | CDS  |
| hsa-miR-3158-3p  | NM_001225 | CASP4 | 0.000193288 | CDS  |
| hsa-miR-3160-5p  | NM_001225 | CASP4 | 0.000429816 | CDS  |
| hsa-miR-3162-5p  | NM_001225 | CASP4 | 0.000592024 | CDS  |
| hsa-miR-3169     | NM_001225 | CASP4 | 8.66E-05    | CDS  |
| hsa-miR-3171     | NM_001225 | CASP4 | 0.002472239 | CDS  |
| hsa-miR-3173-3p  | NM_001225 | CASP4 | 0.006369709 | CDS  |
| hsa-miR-3174     | NM_001225 | CASP4 | 0.004446168 | CDS  |
| hsa-miR-3176     | NM_001225 | CASP4 | 4.34E-05    | CDS  |
| hsa-miR-3177-3p  | NM_001225 | CASP4 | 2.20E-05    | CDS  |
| hsa-miR-3180-5p  | NM_001225 | CASP4 | 0.002870221 | CDS  |
| hsa-miR-3180-3p  | NM_001225 | CASP4 | 0.001637462 | CDS  |
| hsa-miR-3181     | NM_001225 | CASP4 | 8.39E-06    | CDS  |
| hsa-miR-3181     | NM_001225 | CASP4 | 0.00124429  | CDS  |
| hsa-miR-3183     | NM_001225 | CASP4 | 0.000102933 | 5UTR |
| hsa-miR-3183     | NM_001225 | CASP4 | 0.002304037 | CDS  |
| hsa-miR-3184-5p  | NM_001225 | CASP4 | 8.78E-05    | CDS  |
| hsa-miR-3184-5p  | NM_001225 | CASP4 | 0.04308311  | 5UTR |
| hsa-miR-3185     | NM_001225 | CASP4 | 0.000429816 | CDS  |
| hsa-miR-3186-5p  | NM_001225 | CASP4 | 0.0151755   | CDS  |
| hsa-miR-3187-5p  | NM_001225 | CASP4 | 0.01923861  | CDS  |
| hsa-miR-3187-3p  | NM_001225 | CASP4 | 0.000140068 | 5UTR |
| hsa-miR-3188     | NM_001225 | CASP4 | 0.01076079  | CDS  |
| hsa-miR-3189-5p  | NM_001225 | CASP4 | 9.07E-06    | CDS  |

|                 |           |       |             |      |
|-----------------|-----------|-------|-------------|------|
| hsa-miR-3189-3p | NM_001225 | CASP4 | 0.001807756 | CDS  |
| hsa-miR-3190-5p | NM_001225 | CASP4 | 3.30E-05    | CDS  |
| hsa-miR-3190-3p | NM_001225 | CASP4 | 0.000606734 | CDS  |
| hsa-miR-3191-5p | NM_001225 | CASP4 | 0.002311532 | CDS  |
| hsa-miR-3191-5p | NM_001225 | CASP4 | 0.000922214 | CDS  |
| hsa-miR-3191-3p | NM_001225 | CASP4 | 0.002861213 | CDS  |
| hsa-miR-3192-5p | NM_001225 | CASP4 | 0.03101366  | CDS  |
| hsa-miR-3192-5p | NM_001225 | CASP4 | 3.01E-06    | CDS  |
| hsa-miR-3192-3p | NM_001225 | CASP4 | 5.70E-05    | CDS  |
| hsa-miR-3194-5p | NM_001225 | CASP4 | 0.000887313 | CDS  |
| hsa-miR-3194-3p | NM_001225 | CASP4 | 0.000317383 | CDS  |
| hsa-miR-3195    | NM_001225 | CASP4 | 0.000564804 | CDS  |
| hsa-miR-3195    | NM_001225 | CASP4 | 9.92E-06    | CDS  |
| hsa-miR-3196    | NM_001225 | CASP4 | 4.05E-05    | 5UTR |
| hsa-miR-3197    | NM_001225 | CASP4 | 0.000867817 | CDS  |
| hsa-miR-3199    | NM_001225 | CASP4 | 0.002923447 | 5UTR |
| hsa-miR-3200-3p | NM_001225 | CASP4 | 6.27E-05    | CDS  |
| hsa-miR-514b-3p | NM_001225 | CASP4 | 5.83E-05    | CDS  |
| hsa-miR-514b-3p | NM_001225 | CASP4 | 0.000432335 | CDS  |
| hsa-miR-4296    | NM_001225 | CASP4 | 0.004418741 | CDS  |
| hsa-miR-4297    | NM_001225 | CASP4 | 0.00859865  | 5UTR |
| hsa-miR-378c    | NM_001225 | CASP4 | 0.02723061  | CDS  |
| hsa-miR-4294    | NM_001225 | CASP4 | 0.003143502 | CDS  |
| hsa-miR-4299    | NM_001225 | CASP4 | 0.000122406 | CDS  |
| hsa-miR-4299    | NM_001225 | CASP4 | 0.000578367 | CDS  |
| hsa-miR-4304    | NM_001225 | CASP4 | 0.001365539 | CDS  |
| hsa-miR-4302    | NM_001225 | CASP4 | 9.29E-05    | CDS  |
| hsa-miR-4305    | NM_001225 | CASP4 | 0.001474321 | CDS  |
| hsa-miR-4305    | NM_001225 | CASP4 | 0.3503675   | CDS  |
| hsa-miR-4308    | NM_001225 | CASP4 | 0.004508277 | CDS  |
| hsa-miR-4311    | NM_001225 | CASP4 | 0.002868814 | CDS  |
| hsa-miR-4312    | NM_001225 | CASP4 | 0.0001625   | CDS  |
| hsa-miR-4312    | NM_001225 | CASP4 | 0.000142782 | CDS  |
| hsa-miR-4315    | NM_001225 | CASP4 | 0.001140635 | CDS  |
| hsa-miR-4316    | NM_001225 | CASP4 | 0.004667567 | CDS  |
| hsa-miR-4314    | NM_001225 | CASP4 | 2.44E-05    | CDS  |
| hsa-miR-4320    | NM_001225 | CASP4 | 0.005669939 | CDS  |
| hsa-miR-4317    | NM_001225 | CASP4 | 0.001495267 | CDS  |
| hsa-miR-4322    | NM_001225 | CASP4 | 0.1115906   | 5UTR |
| hsa-miR-4321    | NM_001225 | CASP4 | 0.000318808 | CDS  |
| hsa-miR-4256    | NM_001225 | CASP4 | 0.2224987   | 3UTR |
| hsa-miR-4258    | NM_001225 | CASP4 | 0.00307967  | CDS  |
| hsa-miR-4260    | NM_001225 | CASP4 | 0.008948377 | CDS  |
| hsa-miR-4260    | NM_001225 | CASP4 | 0.01118274  | CDS  |

|                 |           |       |             |      |
|-----------------|-----------|-------|-------------|------|
| hsa-miR-4253    | NM_001225 | CASP4 | 0.000781748 | CDS  |
| hsa-miR-4254    | NM_001225 | CASP4 | 8.39E-06    | CDS  |
| hsa-miR-4252    | NM_001225 | CASP4 | 0.000723658 | CDS  |
| hsa-miR-4252    | NM_001225 | CASP4 | 0.001122082 | CDS  |
| hsa-miR-4326    | NM_001225 | CASP4 | 0.4120304   | CDS  |
| hsa-miR-4327    | NM_001225 | CASP4 | 0.00048512  | CDS  |
| hsa-miR-4265    | NM_001225 | CASP4 | 0.001806281 | CDS  |
| hsa-miR-4265    | NM_001225 | CASP4 | 0.01274028  | CDS  |
| hsa-miR-4266    | NM_001225 | CASP4 | 0.005953452 | 3UTR |
| hsa-miR-4267    | NM_001225 | CASP4 | 0.002870221 | CDS  |
| hsa-miR-4268    | NM_001225 | CASP4 | 0.001427036 | CDS  |
| hsa-miR-4268    | NM_001225 | CASP4 | 0.01017319  | CDS  |
| hsa-miR-4268    | NM_001225 | CASP4 | 0.000317383 | CDS  |
| hsa-miR-4269    | NM_001225 | CASP4 | 2.70E-05    | CDS  |
| hsa-miR-4270    | NM_001225 | CASP4 | 0.002868814 | CDS  |
| hsa-miR-4270    | NM_001225 | CASP4 | 0.005156117 | CDS  |
| hsa-miR-4270    | NM_001225 | CASP4 | 0.008560229 | CDS  |
| hsa-miR-4271    | NM_001225 | CASP4 | 0.5672603   | CDS  |
| hsa-miR-4274    | NM_001225 | CASP4 | 0.00011745  | CDS  |
| hsa-miR-4281    | NM_001225 | CASP4 | 0.000781748 | CDS  |
| hsa-miR-4279    | NM_001225 | CASP4 | 0.000883504 | CDS  |
| hsa-miR-4278    | NM_001225 | CASP4 | 0.002314096 | CDS  |
| hsa-miR-4284    | NM_001225 | CASP4 | 9.12E-06    | CDS  |
| hsa-miR-4286    | NM_001225 | CASP4 | 0.00307967  | CDS  |
| hsa-miR-4287    | NM_001225 | CASP4 | 0.01118274  | CDS  |
| hsa-miR-4292    | NM_001225 | CASP4 | 0.00307967  | CDS  |
| hsa-miR-4292    | NM_001225 | CASP4 | 0.000860321 | CDS  |
| hsa-miR-4289    | NM_001225 | CASP4 | 4.82E-05    | CDS  |
| hsa-miR-4290    | NM_001225 | CASP4 | 0.3503675   | CDS  |
| hsa-miR-4329    | NM_001225 | CASP4 | 5.70E-05    | CDS  |
| hsa-miR-3605-5p | NM_001225 | CASP4 | 0.001482999 | CDS  |
| hsa-miR-3605-5p | NM_001225 | CASP4 | 0.000275604 | CDS  |
| hsa-miR-3605-3p | NM_001225 | CASP4 | 0.000645829 | CDS  |
| hsa-miR-3614-5p | NM_001225 | CASP4 | 0.001140635 | CDS  |
| hsa-miR-3614-5p | NM_001225 | CASP4 | 0.000231173 | CDS  |
| hsa-miR-3614-3p | NM_001225 | CASP4 | 0.000282051 | CDS  |
| hsa-miR-3614-3p | NM_001225 | CASP4 | 0.008718099 | CDS  |
| hsa-miR-3616-3p | NM_001225 | CASP4 | 0.02114427  | CDS  |
| hsa-miR-3616-3p | NM_001225 | CASP4 | 0.00080334  | CDS  |
| hsa-miR-3619-5p | NM_001225 | CASP4 | 0.00013726  | CDS  |
| hsa-miR-3619-5p | NM_001225 | CASP4 | 0.002150872 | CDS  |
| hsa-miR-3619-3p | NM_001225 | CASP4 | 0.008535009 | CDS  |
| hsa-miR-3620-5p | NM_001225 | CASP4 | 0.006819084 | 3UTR |
| hsa-miR-3621    | NM_001225 | CASP4 | 0.006819084 | 3UTR |

|                  |           |       |             |      |
|------------------|-----------|-------|-------------|------|
| hsa-miR-3622a-5p | NM_001225 | CASP4 | 0.00104551  | CDS  |
| hsa-miR-3622b-5p | NM_001225 | CASP4 | 0.00438586  | CDS  |
| hsa-miR-3622b-5p | NM_001225 | CASP4 | 0.000844485 | CDS  |
| hsa-miR-3622b-3p | NM_001225 | CASP4 | 0.000188063 | CDS  |
| hsa-miR-3646     | NM_001225 | CASP4 | 0.08274242  | CDS  |
| hsa-miR-3648     | NM_001225 | CASP4 | 0.001122082 | CDS  |
| hsa-miR-3648     | NM_001225 | CASP4 | 0.000127802 | CDS  |
| hsa-miR-3650     | NM_001225 | CASP4 | 0.01804151  | CDS  |
| hsa-miR-3650     | NM_001225 | CASP4 | 0.419973    | CDS  |
| hsa-miR-3650     | NM_001225 | CASP4 | 0.000353171 | CDS  |
| hsa-miR-3652     | NM_001225 | CASP4 | 0.002517568 | CDS  |
| hsa-miR-3654     | NM_001225 | CASP4 | 0.000556588 | CDS  |
| hsa-miR-3655     | NM_001225 | CASP4 | 0.000918596 | CDS  |
| hsa-miR-3659     | NM_001225 | CASP4 | 0.002095427 | CDS  |
| hsa-miR-3661     | NM_001225 | CASP4 | 0.001142641 | CDS  |
| hsa-miR-3663-5p  | NM_001225 | CASP4 | 0.000231173 | CDS  |
| hsa-miR-3663-5p  | NM_001225 | CASP4 | 0.0218458   | 3UTR |
| hsa-miR-3663-3p  | NM_001225 | CASP4 | 4.82E-05    | CDS  |
| hsa-miR-3665     | NM_001225 | CASP4 | 0.153048    | CDS  |
| hsa-miR-3665     | NM_001225 | CASP4 | 0.000618857 | CDS  |
| hsa-miR-3667-5p  | NM_001225 | CASP4 | 0.000379457 | CDS  |
| hsa-miR-3667-3p  | NM_001225 | CASP4 | 0.003929355 | CDS  |
| hsa-miR-3670     | NM_001225 | CASP4 | 0.01085729  | CDS  |
| hsa-miR-3670     | NM_001225 | CASP4 | 0.002698706 | CDS  |
| hsa-miR-3675-5p  | NM_001225 | CASP4 | 0.01804151  | CDS  |
| hsa-miR-3677-5p  | NM_001225 | CASP4 | 0.000530791 | CDS  |
| hsa-miR-3677-5p  | NM_001225 | CASP4 | 0.002346691 | CDS  |
| hsa-miR-3677-3p  | NM_001225 | CASP4 | 4.95E-07    | CDS  |
| hsa-miR-3678-3p  | NM_001225 | CASP4 | 0.002472239 | CDS  |
| hsa-miR-3679-5p  | NM_001225 | CASP4 | 0.006276804 | CDS  |
| hsa-miR-3679-5p  | NM_001225 | CASP4 | 0.002861213 | CDS  |
| hsa-miR-3679-3p  | NM_001225 | CASP4 | 0.000804351 | CDS  |
| hsa-miR-3682-3p  | NM_001225 | CASP4 | 0.001680409 | CDS  |
| hsa-miR-3688-5p  | NM_001225 | CASP4 | 0.000530791 | CDS  |
| hsa-miR-3688-3p  | NM_001225 | CASP4 | 0.003143502 | CDS  |
| hsa-miR-3689a-5p | NM_001225 | CASP4 | 0.004891425 | CDS  |
| hsa-miR-3689a-5p | NM_001225 | CASP4 | 3.30E-05    | CDS  |
| hsa-miR-3689a-3p | NM_001225 | CASP4 | 0.02723061  | CDS  |
| hsa-miR-3690     | NM_001225 | CASP4 | 0.001474321 | CDS  |
| hsa-miR-3691-5p  | NM_001225 | CASP4 | 0.000346078 | CDS  |
| hsa-miR-3692-5p  | NM_001225 | CASP4 | 0.002982281 | CDS  |
| hsa-miR-3180     | NM_001225 | CASP4 | 0.04674126  | 5UTR |
| hsa-miR-3180     | NM_001225 | CASP4 | 0.001637462 | CDS  |
| hsa-miR-3180     | NM_001225 | CASP4 | 0.00080334  | CDS  |

|                   |           |       |             |      |
|-------------------|-----------|-------|-------------|------|
| hsa-miR-3907      | NM_001225 | CASP4 | 0.000125909 | CDS  |
| hsa-miR-3907      | NM_001225 | CASP4 | 0.000661315 | 3UTR |
| hsa-miR-3689b-5p  | NM_001225 | CASP4 | 0.004891425 | CDS  |
| hsa-miR-3689b-5p  | NM_001225 | CASP4 | 3.30E-05    | CDS  |
| hsa-miR-3689b-3p  | NM_001225 | CASP4 | 0.157008    | CDS  |
| hsa-miR-3689b-3p  | NM_001225 | CASP4 | 0.02723061  | CDS  |
| hsa-miR-3689b-3p  | NM_001225 | CASP4 | 0.005953452 | 3UTR |
| hsa-miR-3909      | NM_001225 | CASP4 | 4.32E-05    | CDS  |
| hsa-miR-3909      | NM_001225 | CASP4 | 5.42E-05    | CDS  |
| hsa-miR-3911      | NM_001225 | CASP4 | 0.00275918  | CDS  |
| hsa-miR-3911      | NM_001225 | CASP4 | 0.01007283  | CDS  |
| hsa-miR-3911      | NM_001225 | CASP4 | 0.000178408 | CDS  |
| hsa-miR-3915      | NM_001225 | CASP4 | 0.001057457 | CDS  |
| hsa-miR-3917      | NM_001225 | CASP4 | 0.009826038 | CDS  |
| hsa-miR-3917      | NM_001225 | CASP4 | 0.000604446 | CDS  |
| hsa-miR-3918      | NM_001225 | CASP4 | 0.000891406 | CDS  |
| hsa-miR-3150b-5p  | NM_001225 | CASP4 | 0.000807785 | CDS  |
| hsa-miR-3150b-5p  | NM_001225 | CASP4 | 0.001058085 | CDS  |
| hsa-miR-3150b-3p  | NM_001225 | CASP4 | 0.001074767 | CDS  |
| hsa-miR-3150b-3p  | NM_001225 | CASP4 | 0.001057457 | CDS  |
| hsa-miR-3921      | NM_001225 | CASP4 | 0.01462679  | CDS  |
| hsa-miR-3922-3p   | NM_001225 | CASP4 | 0.000873931 | CDS  |
| hsa-miR-3928-3p   | NM_001225 | CASP4 | 4.05E-05    | 5UTR |
| hsa-miR-3928-3p   | NM_001225 | CASP4 | 0.00438586  | CDS  |
| hsa-miR-3929      | NM_001225 | CASP4 | 0.001057457 | CDS  |
| hsa-miR-3934-3p   | NM_001225 | CASP4 | 0.000406052 | CDS  |
| hsa-miR-3935      | NM_001225 | CASP4 | 0.07838235  | CDS  |
| hsa-miR-3937      | NM_001225 | CASP4 | 0.2003249   | 3UTR |
| hsa-miR-3939      | NM_001225 | CASP4 | 0.000131593 | CDS  |
| hsa-miR-3940-5p   | NM_001225 | CASP4 | 0.01274028  | CDS  |
| hsa-miR-3940-5p   | NM_001225 | CASP4 | 0.005953452 | 3UTR |
| hsa-miR-3940-3p   | NM_001225 | CASP4 | 0.001122082 | CDS  |
| hsa-miR-3944-5p   | NM_001225 | CASP4 | 0.000268079 | CDS  |
| hsa-miR-3944-5p   | NM_001225 | CASP4 | 4.32E-05    | CDS  |
| hsa-miR-3944-3p   | NM_001225 | CASP4 | 0.006819084 | 3UTR |
| hsa-miR-374c-3p   | NM_001225 | CASP4 | 0.2003249   | 3UTR |
| hsa-miR-550b-2-5p | NM_001225 | CASP4 | 0.001142641 | CDS  |
| hsa-miR-550b-2-5p | NM_001225 | CASP4 | 0.000248906 | CDS  |
| hsa-miR-548aa     | NM_001225 | CASP4 | 0.002981617 | CDS  |
| hsa-miR-1268b     | NM_001225 | CASP4 | 0.005546619 | CDS  |
| hsa-miR-4425      | NM_001225 | CASP4 | 0.002429208 | CDS  |
| hsa-miR-4429      | NM_001225 | CASP4 | 0.0218458   | CDS  |
| hsa-miR-4433a-5p  | NM_001225 | CASP4 | 9.12E-06    | CDS  |
| hsa-miR-4433a-3p  | NM_001225 | CASP4 | 0.001680409 | CDS  |

|                  |           |       |             |      |
|------------------|-----------|-------|-------------|------|
| hsa-miR-4433a-3p | NM_001225 | CASP4 | 0.004404006 | CDS  |
| hsa-miR-4436a    | NM_001225 | CASP4 | 0.00023335  | CDS  |
| hsa-miR-4436a    | NM_001225 | CASP4 | 0.006733282 | CDS  |
| hsa-miR-4437     | NM_001225 | CASP4 | 0.001122082 | CDS  |
| hsa-miR-4439     | NM_001225 | CASP4 | 0.004446168 | CDS  |
| hsa-miR-4439     | NM_001225 | CASP4 | 0.001321211 | CDS  |
| hsa-miR-4440     | NM_001225 | CASP4 | 0.001431946 | CDS  |
| hsa-miR-4440     | NM_001225 | CASP4 | 0.01298236  | 3UTR |
| hsa-miR-4441     | NM_001225 | CASP4 | 0.001680409 | CDS  |
| hsa-miR-4441     | NM_001225 | CASP4 | 0.005762653 | CDS  |
| hsa-miR-4443     | NM_001225 | CASP4 | 0.005060872 | 3UTR |
| hsa-miR-4443     | NM_001225 | CASP4 | 0.000844485 | CDS  |
| hsa-miR-4443     | NM_001225 | CASP4 | 0.157008    | CDS  |
| hsa-miR-4444     | NM_001225 | CASP4 | 0.000907814 | CDS  |
| hsa-miR-4446-5p  | NM_001225 | CASP4 | 0.001494617 | CDS  |
| hsa-miR-4446-3p  | NM_001225 | CASP4 | 2.78E-05    | CDS  |
| hsa-miR-4446-3p  | NM_001225 | CASP4 | 4.39E-05    | CDS  |
| hsa-miR-4447     | NM_001225 | CASP4 | 0.01469811  | CDS  |
| hsa-miR-4448     | NM_001225 | CASP4 | 0.01017319  | CDS  |
| hsa-miR-4449     | NM_001225 | CASP4 | 0.01412757  | 3UTR |
| hsa-miR-4449     | NM_001225 | CASP4 | 0.002186513 | CDS  |
| hsa-miR-548ag    | NM_001225 | CASP4 | 0.009503041 | CDS  |
| hsa-miR-548ag    | NM_001225 | CASP4 | 0.1530227   | CDS  |
| hsa-miR-4450     | NM_001225 | CASP4 | 0.001249294 | CDS  |
| hsa-miR-4450     | NM_001225 | CASP4 | 0.5664282   | CDS  |
| hsa-miR-4450     | NM_001225 | CASP4 | 0.01506736  | CDS  |
| hsa-miR-4450     | NM_001225 | CASP4 | 0.01093692  | CDS  |
| hsa-miR-4452     | NM_001225 | CASP4 | 0.006899258 | CDS  |
| hsa-miR-4453     | NM_001225 | CASP4 | 0.00215005  | CDS  |
| hsa-miR-4453     | NM_001225 | CASP4 | 0.000309971 | CDS  |
| hsa-miR-4455     | NM_001225 | CASP4 | 0.01076079  | CDS  |
| hsa-miR-4456     | NM_001225 | CASP4 | 0.001058085 | CDS  |
| hsa-miR-4458     | NM_001225 | CASP4 | 0.1524418   | CDS  |
| hsa-miR-378h     | NM_001225 | CASP4 | 0.02723061  | CDS  |
| hsa-miR-3135b    | NM_001225 | CASP4 | 0.000314076 | CDS  |
| hsa-miR-3135b    | NM_001225 | CASP4 | 0.006538049 | 3UTR |
| hsa-miR-4462     | NM_001225 | CASP4 | 0.000432335 | 5UTR |
| hsa-miR-4463     | NM_001225 | CASP4 | 0.000429816 | CDS  |
| hsa-miR-4463     | NM_001225 | CASP4 | 0.006733282 | CDS  |
| hsa-miR-4464     | NM_001225 | CASP4 | 3.43E-05    | CDS  |
| hsa-miR-4464     | NM_001225 | CASP4 | 0.000314076 | CDS  |
| hsa-miR-4468     | NM_001225 | CASP4 | 0.002698706 | CDS  |
| hsa-miR-4469     | NM_001225 | CASP4 | 0.00011745  | CDS  |
| hsa-miR-4469     | NM_001225 | CASP4 | 0.01853112  | CDS  |



|                 |           |       |             |      |
|-----------------|-----------|-------|-------------|------|
| hsa-miR-4472    | NM_001225 | CASP4 | 0.5825232   | CDS  |
| hsa-miR-4476    | NM_001225 | CASP4 | 0.001680409 | CDS  |
| hsa-miR-4476    | NM_001225 | CASP4 | 0.004404006 | CDS  |
| hsa-miR-4478    | NM_001225 | CASP4 | 0.001893298 | CDS  |
| hsa-miR-3689c   | NM_001225 | CASP4 | 0.157008    | CDS  |
| hsa-miR-3689c   | NM_001225 | CASP4 | 0.02723061  | CDS  |
| hsa-miR-3689c   | NM_001225 | CASP4 | 0.005953452 | 3UTR |
| hsa-miR-3689d   | NM_001225 | CASP4 | 0.000867817 | CDS  |
| hsa-miR-3689e   | NM_001225 | CASP4 | 0.004891425 | CDS  |
| hsa-miR-3689e   | NM_001225 | CASP4 | 3.30E-05    | CDS  |
| hsa-miR-3689f   | NM_001225 | CASP4 | 0.004891425 | CDS  |
| hsa-miR-3155b   | NM_001225 | CASP4 | 0.001474321 | CDS  |
| hsa-miR-3155b   | NM_001225 | CASP4 | 0.002981617 | CDS  |
| hsa-miR-4481    | NM_001225 | CASP4 | 0.005060872 | 3UTR |
| hsa-miR-4482-5p | NM_001225 | CASP4 | 2.02E-05    | CDS  |
| hsa-miR-4482-3p | NM_001225 | CASP4 | 0.000135284 | CDS  |
| hsa-miR-4483    | NM_001225 | CASP4 | 0.5672603   | CDS  |
| hsa-miR-4483    | NM_001225 | CASP4 | 8.84E-05    | CDS  |
| hsa-miR-4485-3p | NM_001225 | CASP4 | 0.000891406 | CDS  |
| hsa-miR-4486    | NM_001225 | CASP4 | 0.0218458   | 3UTR |
| hsa-miR-4486    | NM_001225 | CASP4 | 7.30E-05    | CDS  |
| hsa-miR-4486    | NM_001225 | CASP4 | 0.000556588 | CDS  |
| hsa-miR-4487    | NM_001225 | CASP4 | 0.000723216 | CDS  |
| hsa-miR-4488    | NM_001225 | CASP4 | 0.005208109 | 3UTR |
| hsa-miR-4492    | NM_001225 | CASP4 | 0.005598497 | CDS  |
| hsa-miR-4492    | NM_001225 | CASP4 | 0.002150872 | CDS  |
| hsa-miR-4493    | NM_001225 | CASP4 | 0.01017319  | CDS  |
| hsa-miR-4494    | NM_001225 | CASP4 | 0.001474321 | CDS  |
| hsa-miR-4496    | NM_001225 | CASP4 | 0.001893298 | CDS  |
| hsa-miR-4497    | NM_001225 | CASP4 | 0.000637219 | 3UTR |
| hsa-miR-4497    | NM_001225 | CASP4 | 1.16E-06    | CDS  |
| hsa-miR-4498    | NM_001225 | CASP4 | 0.00027619  | CDS  |
| hsa-miR-4498    | NM_001225 | CASP4 | 0.006819084 | 3UTR |
| hsa-miR-4499    | NM_001225 | CASP4 | 0.006733282 | CDS  |
| hsa-miR-4500    | NM_001225 | CASP4 | 0.01506736  | CDS  |
| hsa-miR-4502    | NM_001225 | CASP4 | 0.2401151   | 3UTR |
| hsa-miR-4505    | NM_001225 | CASP4 | 0.006538049 | 3UTR |
| hsa-miR-4506    | NM_001225 | CASP4 | 8.84E-05    | CDS  |
| hsa-miR-4506    | NM_001225 | CASP4 | 0.000152731 | CDS  |
| hsa-miR-2392    | NM_001225 | CASP4 | 4.39E-05    | CDS  |
| hsa-miR-2392    | NM_001225 | CASP4 | 0.004667567 | CDS  |
| hsa-miR-2392    | NM_001225 | CASP4 | 0.001680409 | CDS  |
| hsa-miR-4507    | NM_001225 | CASP4 | 0.005953452 | 3UTR |
| hsa-miR-4508    | NM_001225 | CASP4 | 0.005598497 | CDS  |

|                 |           |       |             |      |
|-----------------|-----------|-------|-------------|------|
| hsa-miR-4508    | NM_001225 | CASP4 | 2.70E-05    | CDS  |
| hsa-miR-4511    | NM_001225 | CASP4 | 0.02628273  | CDS  |
| hsa-miR-4513    | NM_001225 | CASP4 | 0.000316826 | CDS  |
| hsa-miR-4515    | NM_001225 | CASP4 | 0.000353171 | CDS  |
| hsa-miR-4516    | NM_001225 | CASP4 | 0.02336121  | CDS  |
| hsa-miR-4518    | NM_001225 | CASP4 | 0.001122082 | CDS  |
| hsa-miR-4519    | NM_001225 | CASP4 | 0.009414375 | CDS  |
| hsa-miR-4521    | NM_001225 | CASP4 | 0.000807785 | CDS  |
| hsa-miR-4521    | NM_001225 | CASP4 | 0.000172777 | CDS  |
| hsa-miR-4522    | NM_001225 | CASP4 | 6.22E-06    | CDS  |
| hsa-miR-4522    | NM_001225 | CASP4 | 0.001972543 | CDS  |
| hsa-miR-4523    | NM_001225 | CASP4 | 0.01753545  | 3UTR |
| hsa-miR-4523    | NM_001225 | CASP4 | 0.04276046  | 5UTR |
| hsa-miR-4525    | NM_001225 | CASP4 | 0.005060872 | 3UTR |
| hsa-miR-4525    | NM_001225 | CASP4 | 8.44E-05    | CDS  |
| hsa-miR-4525    | NM_001225 | CASP4 | 0.02336121  | CDS  |
| hsa-miR-4525    | NM_001225 | CASP4 | 0.5672603   | CDS  |
| hsa-miR-4526    | NM_001225 | CASP4 | 0.002303406 | CDS  |
| hsa-miR-4527    | NM_001225 | CASP4 | 0.08940229  | CDS  |
| hsa-miR-4529-3p | NM_001225 | CASP4 | 0.000709764 | CDS  |
| hsa-miR-4529-3p | NM_001225 | CASP4 | 4.48E-05    | CDS  |
| hsa-miR-4534    | NM_001225 | CASP4 | 0.000556588 | CDS  |
| hsa-miR-4535    | NM_001225 | CASP4 | 0.000547919 | CDS  |
| hsa-miR-1587    | NM_001225 | CASP4 | 0.006819084 | CDS  |
| hsa-miR-4537    | NM_001225 | CASP4 | 0.00215005  | CDS  |
| hsa-miR-4538    | NM_001225 | CASP4 | 0.01753545  | 3UTR |
| hsa-miR-4539    | NM_001225 | CASP4 | 0.03290779  | CDS  |
| hsa-miR-4539    | NM_001225 | CASP4 | 0.000635321 | 3UTR |
| hsa-miR-4540    | NM_001225 | CASP4 | 0.01629919  | CDS  |
| hsa-miR-3960    | NM_001225 | CASP4 | 9.59E-05    | CDS  |
| hsa-miR-3960    | NM_001225 | CASP4 | 1.41E-05    | CDS  |
| hsa-miR-3972    | NM_001225 | CASP4 | 0.002228703 | CDS  |
| hsa-miR-3972    | NM_001225 | CASP4 | 0.007399047 | CDS  |
| hsa-miR-3972    | NM_001225 | CASP4 | 0.000268314 | CDS  |
| hsa-miR-3974    | NM_001225 | CASP4 | 0.000781748 | CDS  |
| hsa-miR-3976    | NM_001225 | CASP4 | 0.002558787 | CDS  |
| hsa-miR-3978    | NM_001225 | CASP4 | 0.001000701 | CDS  |
| hsa-miR-4632-5p | NM_001225 | CASP4 | 0.000717477 | CDS  |
| hsa-miR-4632-5p | NM_001225 | CASP4 | 0.002868814 | CDS  |
| hsa-miR-4632-5p | NM_001225 | CASP4 | 0.005208109 | CDS  |
| hsa-miR-4633-3p | NM_001225 | CASP4 | 0.002868814 | CDS  |
| hsa-miR-4634    | NM_001225 | CASP4 | 2.83E-05    | CDS  |
| hsa-miR-4634    | NM_001225 | CASP4 | 0.000437056 | CDS  |
| hsa-miR-4638-5p | NM_001225 | CASP4 | 6.27E-05    | CDS  |

|                  |           |       |             |      |
|------------------|-----------|-------|-------------|------|
| hsa-miR-4638-3p  | NM_001225 | CASP4 | 0.000837243 | CDS  |
| hsa-miR-4640-5p  | NM_001225 | CASP4 | 0.000140068 | 5UTR |
| hsa-miR-4640-3p  | NM_001225 | CASP4 | 8.36E-06    | CDS  |
| hsa-miR-4641     | NM_001225 | CASP4 | 0.00859865  | 5UTR |
| hsa-miR-4641     | NM_001225 | CASP4 | 0.08945923  | CDS  |
| hsa-miR-4642     | NM_001225 | CASP4 | 0.01179483  | CDS  |
| hsa-miR-4644     | NM_001225 | CASP4 | 0.04674126  | 5UTR |
| hsa-miR-4645-3p  | NM_001225 | CASP4 | 0.000141499 | CDS  |
| hsa-miR-4646-5p  | NM_001225 | CASP4 | 0.006933323 | CDS  |
| hsa-miR-4646-5p  | NM_001225 | CASP4 | 0.000221888 | CDS  |
| hsa-miR-4647     | NM_001225 | CASP4 | 0.07611103  | CDS  |
| hsa-miR-4647     | NM_001225 | CASP4 | 0.03313369  | CDS  |
| hsa-miR-4649-5p  | NM_001225 | CASP4 | 0.000973404 | 5UTR |
| hsa-miR-4650-5p  | NM_001225 | CASP4 | 0.3503675   | CDS  |
| hsa-miR-4651     | NM_001225 | CASP4 | 0.000606734 | CDS  |
| hsa-miR-4651     | NM_001225 | CASP4 | 0.01469811  | CDS  |
| hsa-miR-4652-3p  | NM_001225 | CASP4 | 5.70E-05    | CDS  |
| hsa-miR-4653-3p  | NM_001225 | CASP4 | 0.005060872 | CDS  |
| hsa-miR-4653-3p  | NM_001225 | CASP4 | 0.000218895 | CDS  |
| hsa-miR-4654     | NM_001225 | CASP4 | 0.1240252   | CDS  |
| hsa-miR-4654     | NM_001225 | CASP4 | 0.000353171 | CDS  |
| hsa-miR-4654     | NM_001225 | CASP4 | 0.002788661 | CDS  |
| hsa-miR-4655-5p  | NM_001225 | CASP4 | 0.000172777 | CDS  |
| hsa-miR-4655-5p  | NM_001225 | CASP4 | 0.000526877 | CDS  |
| hsa-miR-4655-5p  | NM_001225 | CASP4 | 0.04080268  | CDS  |
| hsa-miR-4656     | NM_001225 | CASP4 | 0.003029624 | CDS  |
| hsa-miR-4656     | NM_001225 | CASP4 | 0.009782782 | CDS  |
| hsa-miR-4656     | NM_001225 | CASP4 | 3.43E-05    | CDS  |
| hsa-miR-4657     | NM_001225 | CASP4 | 0.000387079 | CDS  |
| hsa-miR-4657     | NM_001225 | CASP4 | 3.30E-05    | CDS  |
| hsa-miR-4658     | NM_001225 | CASP4 | 0.000164883 | CDS  |
| hsa-miR-4658     | NM_001225 | CASP4 | 0.00293118  | CDS  |
| hsa-miR-4659a-5p | NM_001225 | CASP4 | 1.28E-05    | CDS  |
| hsa-miR-4661-5p  | NM_001225 | CASP4 | 0.01713811  | CDS  |
| hsa-miR-4661-3p  | NM_001225 | CASP4 | 9.12E-06    | CDS  |
| hsa-miR-4659b-3p | NM_001225 | CASP4 | 0.000124817 | CDS  |
| hsa-miR-4659b-3p | NM_001225 | CASP4 | 0.000299959 | CDS  |
| hsa-miR-4663     | NM_001225 | CASP4 | 0.01082276  | CDS  |
| hsa-miR-4663     | NM_001225 | CASP4 | 1.36E-06    | CDS  |
| hsa-miR-4664-5p  | NM_001225 | CASP4 | 0.000278641 | CDS  |
| hsa-miR-4664-3p  | NM_001225 | CASP4 | 0.01227059  | CDS  |
| hsa-miR-4665-3p  | NM_001225 | CASP4 | 2.26E-06    | CDS  |
| hsa-miR-4667-5p  | NM_001225 | CASP4 | 0.001482999 | CDS  |
| hsa-miR-4667-3p  | NM_001225 | CASP4 | 0.005658901 | CDS  |

|                 |           |       |             |      |
|-----------------|-----------|-------|-------------|------|
| hsa-miR-4667-3p | NM_001225 | CASP4 | 0.001140635 | CDS  |
| hsa-miR-219b-5p | NM_001225 | CASP4 | 0.000788275 | CDS  |
| hsa-miR-4669    | NM_001225 | CASP4 | 0.005841042 | CDS  |
| hsa-miR-4674    | NM_001225 | CASP4 | 0.00215005  | CDS  |
| hsa-miR-4675    | NM_001225 | CASP4 | 0.01412757  | CDS  |
| hsa-miR-4676-5p | NM_001225 | CASP4 | 0.00215005  | CDS  |
| hsa-miR-4677-5p | NM_001225 | CASP4 | 0.000174181 | CDS  |
| hsa-miR-4681    | NM_001225 | CASP4 | 0.0109351   | 3UTR |
| hsa-miR-4682    | NM_001225 | CASP4 | 0.000135284 | CDS  |
| hsa-miR-4684-5p | NM_001225 | CASP4 | 0.000386263 | CDS  |
| hsa-miR-4685-5p | NM_001225 | CASP4 | 0.002982281 | CDS  |
| hsa-miR-4686    | NM_001225 | CASP4 | 0.0218458   | 3UTR |
| hsa-miR-4686    | NM_001225 | CASP4 | 0.000189105 | CDS  |
| hsa-miR-4687-5p | NM_001225 | CASP4 | 0.00124429  | CDS  |
| hsa-miR-4687-3p | NM_001225 | CASP4 | 0.000222006 | CDS  |
| hsa-miR-4687-3p | NM_001225 | CASP4 | 0.000973404 | 5UTR |
| hsa-miR-4687-3p | NM_001225 | CASP4 | 0.002923447 | 5UTR |
| hsa-miR-1343-5p | NM_001225 | CASP4 | 0.000318808 | CDS  |
| hsa-miR-1343-5p | NM_001225 | CASP4 | 0.001482999 | CDS  |
| hsa-miR-1343-5p | NM_001225 | CASP4 | 0.01093692  | CDS  |
| hsa-miR-1343-3p | NM_001225 | CASP4 | 2.11E-05    | CDS  |
| hsa-miR-4688    | NM_001225 | CASP4 | 0.001160472 | CDS  |
| hsa-miR-4689    | NM_001225 | CASP4 | 0.002861213 | CDS  |
| hsa-miR-4689    | NM_001225 | CASP4 | 0.001057457 | CDS  |
| hsa-miR-4689    | NM_001225 | CASP4 | 0.04654808  | CDS  |
| hsa-miR-4690-5p | NM_001225 | CASP4 | 0.01753545  | 3UTR |
| hsa-miR-4691-5p | NM_001225 | CASP4 | 9.79E-05    | CDS  |
| hsa-miR-4691-5p | NM_001225 | CASP4 | 0.00059852  | CDS  |
| hsa-miR-4691-3p | NM_001225 | CASP4 | 0.000614096 | CDS  |
| hsa-miR-4692    | NM_001225 | CASP4 | 0.003677598 | CDS  |
| hsa-miR-4692    | NM_001225 | CASP4 | 0.009163709 | CDS  |
| hsa-miR-4693-3p | NM_001225 | CASP4 | 7.46E-06    | CDS  |
| hsa-miR-4695-5p | NM_001225 | CASP4 | 0.000867817 | CDS  |
| hsa-miR-4695-5p | NM_001225 | CASP4 | 0.005953452 | 3UTR |
| hsa-miR-4697-3p | NM_001225 | CASP4 | 2.55E-06    | CDS  |
| hsa-miR-4700-5p | NM_001225 | CASP4 | 0.007685493 | CDS  |
| hsa-miR-4700-3p | NM_001225 | CASP4 | 2.83E-05    | CDS  |
| hsa-miR-4701-3p | NM_001225 | CASP4 | 0.000717477 | CDS  |
| hsa-miR-4706    | NM_001225 | CASP4 | 0.001893298 | CDS  |
| hsa-miR-4707-5p | NM_001225 | CASP4 | 8.39E-06    | CDS  |
| hsa-miR-4707-5p | NM_001225 | CASP4 | 0.00307967  | CDS  |
| hsa-miR-4708-3p | NM_001225 | CASP4 | 0.03057205  | CDS  |
| hsa-miR-4708-3p | NM_001225 | CASP4 | 0.000781748 | CDS  |
| hsa-miR-4709-3p | NM_001225 | CASP4 | 0.001806281 | CDS  |

|                 |           |       |             |      |
|-----------------|-----------|-------|-------------|------|
| hsa-miR-4710    | NM_001225 | CASP4 | 0.004667567 | CDS  |
| hsa-miR-4710    | NM_001225 | CASP4 | 0.004446168 | CDS  |
| hsa-miR-4711-5p | NM_001225 | CASP4 | 0.000268314 | CDS  |
| hsa-miR-4713-3p | NM_001225 | CASP4 | 0.002808639 | CDS  |
| hsa-miR-4714-5p | NM_001225 | CASP4 | 5.70E-05    | CDS  |
| hsa-miR-4714-3p | NM_001225 | CASP4 | 0.000860321 | CDS  |
| hsa-miR-4714-3p | NM_001225 | CASP4 | 9.44E-06    | CDS  |
| hsa-miR-4715-3p | NM_001225 | CASP4 | 4.32E-05    | CDS  |
| hsa-miR-4716-5p | NM_001225 | CASP4 | 0.3628757   | CDS  |
| hsa-miR-3529-5p | NM_001225 | CASP4 | 0.008220982 | CDS  |
| hsa-miR-4717-5p | NM_001225 | CASP4 | 0.000781748 | CDS  |
| hsa-miR-4717-3p | NM_001225 | CASP4 | 0.01093692  | CDS  |
| hsa-miR-4717-3p | NM_001225 | CASP4 | 0.001853865 | CDS  |
| hsa-miR-4717-3p | NM_001225 | CASP4 | 0.00156445  | CDS  |
| hsa-miR-4718    | NM_001225 | CASP4 | 0.005470165 | CDS  |
| hsa-miR-4720-5p | NM_001225 | CASP4 | 0.01194194  | CDS  |
| hsa-miR-4721    | NM_001225 | CASP4 | 0.004304008 | CDS  |
| hsa-miR-4722-5p | NM_001225 | CASP4 | 0.005953452 | CDS  |
| hsa-miR-4722-3p | NM_001225 | CASP4 | 0.002982281 | CDS  |
| hsa-miR-4723-5p | NM_001225 | CASP4 | 2.14E-05    | CDS  |
| hsa-miR-4723-3p | NM_001225 | CASP4 | 8.36E-06    | CDS  |
| hsa-miR-4723-3p | NM_001225 | CASP4 | 0.000386263 | CDS  |
| hsa-miR-4723-3p | NM_001225 | CASP4 | 0.000525684 | CDS  |
| hsa-miR-4724-5p | NM_001225 | CASP4 | 0.006931316 | CDS  |
| hsa-miR-4724-3p | NM_001225 | CASP4 | 0.001765413 | CDS  |
| hsa-miR-4724-3p | NM_001225 | CASP4 | 0.1494029   | CDS  |
| hsa-miR-4725-5p | NM_001225 | CASP4 | 9.12E-06    | CDS  |
| hsa-miR-4725-3p | NM_001225 | CASP4 | 0.00215005  | CDS  |
| hsa-miR-4726-5p | NM_001225 | CASP4 | 0.000781748 | CDS  |
| hsa-miR-4726-3p | NM_001225 | CASP4 | 0.000127802 | CDS  |
| hsa-miR-4726-3p | NM_001225 | CASP4 | 2.02E-05    | CDS  |
| hsa-miR-4727-5p | NM_001225 | CASP4 | 0.001944551 | CDS  |
| hsa-miR-4728-5p | NM_001225 | CASP4 | 0.005953452 | 3UTR |
| hsa-miR-4728-5p | NM_001225 | CASP4 | 0.02456692  | CDS  |
| hsa-miR-4728-5p | NM_001225 | CASP4 | 0.000723216 | CDS  |
| hsa-miR-4728-3p | NM_001225 | CASP4 | 0.000631488 | CDS  |
| hsa-miR-4728-3p | NM_001225 | CASP4 | 2.83E-05    | CDS  |
| hsa-miR-4730    | NM_001225 | CASP4 | 0.000449296 | CDS  |
| hsa-miR-4730    | NM_001225 | CASP4 | 0.000127802 | CDS  |
| hsa-miR-4731-5p | NM_001225 | CASP4 | 0.005133538 | CDS  |
| hsa-miR-4732-5p | NM_001225 | CASP4 | 0.001482999 | CDS  |
| hsa-miR-4732-3p | NM_001225 | CASP4 | 9.92E-06    | CDS  |
| hsa-miR-4732-3p | NM_001225 | CASP4 | 0.002877047 | CDS  |
| hsa-miR-4733-5p | NM_001225 | CASP4 | 1.05E-05    | CDS  |

|                 |           |       |             |      |
|-----------------|-----------|-------|-------------|------|
| hsa-miR-4733-5p | NM_001225 | CASP4 | 0.001839698 | CDS  |
| hsa-miR-4733-3p | NM_001225 | CASP4 | 0.001365539 | CDS  |
| hsa-miR-4734    | NM_001225 | CASP4 | 1.81E-05    | CDS  |
| hsa-miR-4735-5p | NM_001225 | CASP4 | 0.000872079 | CDS  |
| hsa-miR-4735-3p | NM_001225 | CASP4 | 0.000662504 | 3UTR |
| hsa-miR-4736    | NM_001225 | CASP4 | 2.70E-05    | CDS  |
| hsa-miR-4736    | NM_001225 | CASP4 | 0.005352298 | CDS  |
| hsa-miR-4737    | NM_001225 | CASP4 | 0.000234425 | CDS  |
| hsa-miR-3064-5p | NM_001225 | CASP4 | 0.01923861  | 3UTR |
| hsa-miR-3064-5p | NM_001225 | CASP4 | 0.000189105 | CDS  |
| hsa-miR-3064-5p | NM_001225 | CASP4 | 0.000860321 | CDS  |
| hsa-miR-3064-3p | NM_001225 | CASP4 | 0.001495267 | CDS  |
| hsa-miR-4738-3p | NM_001225 | CASP4 | 1.81E-05    | CDS  |
| hsa-miR-4738-3p | NM_001225 | CASP4 | 0.000837243 | CDS  |
| hsa-miR-4739    | NM_001225 | CASP4 | 0.000592024 | CDS  |
| hsa-miR-4740-3p | NM_001225 | CASP4 | 0.000188063 | CDS  |
| hsa-miR-4740-3p | NM_001225 | CASP4 | 8.39E-06    | CDS  |
| hsa-miR-4740-3p | NM_001225 | CASP4 | 0.001122082 | CDS  |
| hsa-miR-4741    | NM_001225 | CASP4 | 0.002303406 | CDS  |
| hsa-miR-4743-5p | NM_001225 | CASP4 | 4.34E-05    | CDS  |
| hsa-miR-4743-5p | NM_001225 | CASP4 | 0.000723216 | CDS  |
| hsa-miR-4743-3p | NM_001225 | CASP4 | 0.000922214 | CDS  |
| hsa-miR-4745-5p | NM_001225 | CASP4 | 0.07838235  | CDS  |
| hsa-miR-4745-3p | NM_001225 | CASP4 | 6.22E-06    | CDS  |
| hsa-miR-4746-5p | NM_001225 | CASP4 | 0.000723658 | CDS  |
| hsa-miR-4746-5p | NM_001225 | CASP4 | 0.002314096 | CDS  |
| hsa-miR-4746-5p | NM_001225 | CASP4 | 0.001560491 | CDS  |
| hsa-miR-4746-3p | NM_001225 | CASP4 | 0.000109679 | CDS  |
| hsa-miR-4746-3p | NM_001225 | CASP4 | 0.000652818 | 3UTR |
| hsa-miR-4747-5p | NM_001225 | CASP4 | 0.04494976  | 5UTR |
| hsa-miR-4747-3p | NM_001225 | CASP4 | 0.001122082 | CDS  |
| hsa-miR-4748    | NM_001225 | CASP4 | 0.08531279  | CDS  |
| hsa-miR-4748    | NM_001225 | CASP4 | 0.00080334  | CDS  |
| hsa-miR-4748    | NM_001225 | CASP4 | 0.003428258 | CDS  |
| hsa-miR-4749-5p | NM_001225 | CASP4 | 0.001893298 | CDS  |
| hsa-miR-4750-5p | NM_001225 | CASP4 | 0.000922214 | CDS  |
| hsa-miR-4750-5p | NM_001225 | CASP4 | 0.000604446 | CDS  |
| hsa-miR-4750-5p | NM_001225 | CASP4 | 0.009826038 | CDS  |
| hsa-miR-4750-3p | NM_001225 | CASP4 | 1.38E-05    | CDS  |
| hsa-miR-4751    | NM_001225 | CASP4 | 0.000141499 | CDS  |
| hsa-miR-4751    | NM_001225 | CASP4 | 8.44E-05    | CDS  |
| hsa-miR-4752    | NM_001225 | CASP4 | 0.00023617  | CDS  |
| hsa-miR-371b-5p | NM_001225 | CASP4 | 1.47E-05    | CDS  |
| hsa-miR-371b-3p | NM_001225 | CASP4 | 0.001142641 | CDS  |

|                  |           |       |             |      |
|------------------|-----------|-------|-------------|------|
| hsa-miR-371b-3p  | NM_001225 | CASP4 | 0.0002477   | CDS  |
| hsa-miR-371b-3p  | NM_001225 | CASP4 | 0.000125909 | CDS  |
| hsa-miR-4754     | NM_001225 | CASP4 | 0.002870221 | CDS  |
| hsa-miR-4754     | NM_001225 | CASP4 | 2.20E-05    | CDS  |
| hsa-miR-4755-5p  | NM_001225 | CASP4 | 2.12E-05    | CDS  |
| hsa-miR-4755-5p  | NM_001225 | CASP4 | 8.36E-06    | CDS  |
| hsa-miR-4755-3p  | NM_001225 | CASP4 | 0.00293118  | CDS  |
| hsa-miR-4755-3p  | NM_001225 | CASP4 | 0.002517568 | CDS  |
| hsa-miR-499b-5p  | NM_001225 | CASP4 | 0.00124429  | CDS  |
| hsa-miR-4756-5p  | NM_001225 | CASP4 | 0.000155666 | CDS  |
| hsa-miR-4756-3p  | NM_001225 | CASP4 | 0.000587308 | 5UTR |
| hsa-miR-4757-5p  | NM_001225 | CASP4 | 5.71E-05    | 5UTR |
| hsa-miR-4758-5p  | NM_001225 | CASP4 | 0.006073437 | CDS  |
| hsa-miR-4758-5p  | NM_001225 | CASP4 | 0.000215353 | CDS  |
| hsa-miR-4758-3p  | NM_001225 | CASP4 | 9.07E-06    | CDS  |
| hsa-miR-4761-3p  | NM_001225 | CASP4 | 5.15E-05    | 5UTR |
| hsa-miR-4761-3p  | NM_001225 | CASP4 | 0.02114427  | CDS  |
| hsa-miR-4763-3p  | NM_001225 | CASP4 | 0.005953452 | CDS  |
| hsa-miR-4763-3p  | NM_001225 | CASP4 | 0.00104551  | CDS  |
| hsa-miR-4764-5p  | NM_001225 | CASP4 | 0.000346078 | CDS  |
| hsa-miR-4766-3p  | NM_001225 | CASP4 | 0.000449296 | CDS  |
| hsa-miR-4767     | NM_001225 | CASP4 | 0.000131593 | CDS  |
| hsa-miR-4767     | NM_001225 | CASP4 | 0.02114427  | CDS  |
| hsa-miR-4768-5p  | NM_001225 | CASP4 | 3.16E-05    | CDS  |
| hsa-miR-4769-5p  | NM_001225 | CASP4 | 0.5672603   | CDS  |
| hsa-miR-4769-3p  | NM_001225 | CASP4 | 0.000155947 | CDS  |
| hsa-miR-4776-5p  | NM_001225 | CASP4 | 0.00011745  | CDS  |
| hsa-miR-4778-3p  | NM_001225 | CASP4 | 0.3628757   | CDS  |
| hsa-miR-4780     | NM_001225 | CASP4 | 0.000188063 | CDS  |
| hsa-miR-4780     | NM_001225 | CASP4 | 8.36E-06    | CDS  |
| hsa-miR-4436b-5p | NM_001225 | CASP4 | 0.000505356 | 5UTR |
| hsa-miR-4436b-5p | NM_001225 | CASP4 | 6.19E-05    | CDS  |
| hsa-miR-4436b-3p | NM_001225 | CASP4 | 0.002698706 | CDS  |
| hsa-miR-4781-5p  | NM_001225 | CASP4 | 0.000383308 | CDS  |
| hsa-miR-4782-5p  | NM_001225 | CASP4 | 3.30E-05    | CDS  |
| hsa-miR-4782-3p  | NM_001225 | CASP4 | 0.001687244 | CDS  |
| hsa-miR-4783-3p  | NM_001225 | CASP4 | 0.000172777 | CDS  |
| hsa-miR-4784     | NM_001225 | CASP4 | 0.006276804 | 3UTR |
| hsa-miR-4784     | NM_001225 | CASP4 | 0.000218895 | CDS  |
| hsa-miR-2467-5p  | NM_001225 | CASP4 | 0.002728573 | CDS  |
| hsa-miR-2467-5p  | NM_001225 | CASP4 | 0.02104202  | CDS  |
| hsa-miR-2467-5p  | NM_001225 | CASP4 | 5.71E-05    | 5UTR |
| hsa-miR-2467-3p  | NM_001225 | CASP4 | 0.001057457 | CDS  |
| hsa-miR-2467-3p  | NM_001225 | CASP4 | 0.000973404 | 5UTR |

|                 |           |       |             |      |
|-----------------|-----------|-------|-------------|------|
| hsa-miR-4786-5p | NM_001225 | CASP4 | 0.004304008 | CDS  |
| hsa-miR-4786-3p | NM_001225 | CASP4 | 0.01128548  | CDS  |
| hsa-miR-4786-3p | NM_001225 | CASP4 | 4.82E-05    | CDS  |
| hsa-miR-4787-5p | NM_001225 | CASP4 | 2.56E-05    | CDS  |
| hsa-miR-4787-3p | NM_001225 | CASP4 | 0.000369195 | CDS  |
| hsa-miR-4791    | NM_001225 | CASP4 | 6.04E-05    | CDS  |
| hsa-miR-4793-5p | NM_001225 | CASP4 | 0.002186513 | CDS  |
| hsa-miR-4793-3p | NM_001225 | CASP4 | 0.000706898 | CDS  |
| hsa-miR-4795-3p | NM_001225 | CASP4 | 0.000725653 | CDS  |
| hsa-miR-4797-5p | NM_001225 | CASP4 | 0.000316826 | CDS  |
| hsa-miR-4797-5p | NM_001225 | CASP4 | 0.002487907 | CDS  |
| hsa-miR-4797-3p | NM_001225 | CASP4 | 0.003849335 | CDS  |
| hsa-miR-4802-5p | NM_001225 | CASP4 | 1.16E-05    | CDS  |
| hsa-miR-4999-5p | NM_001225 | CASP4 | 0.07567372  | CDS  |
| hsa-miR-5000-5p | NM_001225 | CASP4 | 0.1168332   | CDS  |
| hsa-miR-5001-5p | NM_001225 | CASP4 | 0.01804151  | CDS  |
| hsa-miR-5001-3p | NM_001225 | CASP4 | 0.03592735  | CDS  |
| hsa-miR-5001-3p | NM_001225 | CASP4 | 0.000102933 | 5UTR |
| hsa-miR-5001-3p | NM_001225 | CASP4 | 0.000323006 | CDS  |
| hsa-miR-5003-3p | NM_001225 | CASP4 | 0.01114662  | CDS  |
| hsa-miR-5004-5p | NM_001225 | CASP4 | 0.002861213 | CDS  |
| hsa-miR-5004-3p | NM_001225 | CASP4 | 0.001021701 | CDS  |
| hsa-miR-5004-3p | NM_001225 | CASP4 | 0.01853112  | CDS  |
| hsa-miR-5006-5p | NM_001225 | CASP4 | 0.012822    | CDS  |
| hsa-miR-5007-5p | NM_001225 | CASP4 | 0.000709764 | CDS  |
| hsa-miR-5008-5p | NM_001225 | CASP4 | 0.00438586  | CDS  |
| hsa-miR-5008-5p | NM_001225 | CASP4 | 0.00080334  | CDS  |
| hsa-miR-5008-5p | NM_001225 | CASP4 | 0.002861213 | CDS  |
| hsa-miR-5010-5p | NM_001225 | CASP4 | 0.00104551  | CDS  |
| hsa-miR-5010-5p | NM_001225 | CASP4 | 0.02336121  | CDS  |
| hsa-miR-5011-3p | NM_001225 | CASP4 | 0.1867544   | 3UTR |
| hsa-miR-5047    | NM_001225 | CASP4 | 0.153048    | CDS  |
| hsa-miR-5087    | NM_001225 | CASP4 | 0.000169899 | CDS  |
| hsa-miR-5088-5p | NM_001225 | CASP4 | 0.02617972  | CDS  |
| hsa-miR-5088-3p | NM_001225 | CASP4 | 0.002311532 | CDS  |
| hsa-miR-5088-3p | NM_001225 | CASP4 | 0.005475725 | CDS  |
| hsa-miR-5089-5p | NM_001225 | CASP4 | 0.05984624  | CDS  |
| hsa-miR-5090    | NM_001225 | CASP4 | 0.000606734 | CDS  |
| hsa-miR-5090    | NM_001225 | CASP4 | 4.84E-05    | CDS  |
| hsa-miR-5093    | NM_001225 | CASP4 | 0.005953452 | CDS  |
| hsa-miR-5189-5p | NM_001225 | CASP4 | 0.000526877 | CDS  |
| hsa-miR-5189-3p | NM_001225 | CASP4 | 0.000268314 | CDS  |
| hsa-miR-5189-3p | NM_001225 | CASP4 | 0.001474321 | CDS  |
| hsa-miR-5190    | NM_001225 | CASP4 | 0.2935726   | CDS  |



|                  |           |       |             |      |
|------------------|-----------|-------|-------------|------|
| hsa-miR-5191     | NM_001225 | CASP4 | 0.002558787 | CDS  |
| hsa-miR-5192     | NM_001225 | CASP4 | 0.002811797 | CDS  |
| hsa-miR-5192     | NM_001225 | CASP4 | 0.001637462 | CDS  |
| hsa-miR-5192     | NM_001225 | CASP4 | 0.000933598 | CDS  |
| hsa-miR-5193     | NM_001225 | CASP4 | 0.002870221 | CDS  |
| hsa-miR-5194     | NM_001225 | CASP4 | 0.01506736  | CDS  |
| hsa-miR-5195-3p  | NM_001225 | CASP4 | 0.01114662  | CDS  |
| hsa-miR-5196-5p  | NM_001225 | CASP4 | 0.04098359  | 3UTR |
| hsa-miR-5196-5p  | NM_001225 | CASP4 | 0.003393045 | CDS  |
| hsa-miR-4524b-5p | NM_001225 | CASP4 | 0.006381234 | CDS  |
| hsa-miR-5571-3p  | NM_001225 | CASP4 | 0.000140068 | 5UTR |
| hsa-miR-5100     | NM_001225 | CASP4 | 0.000325446 | CDS  |
| hsa-miR-5100     | NM_001225 | CASP4 | 0.000137537 | CDS  |
| hsa-miR-5572     | NM_001225 | CASP4 | 0.001645588 | CDS  |
| hsa-miR-5572     | NM_001225 | CASP4 | 0.000844485 | CDS  |
| hsa-miR-5580-5p  | NM_001225 | CASP4 | 0.01082276  | CDS  |
| hsa-miR-5580-3p  | NM_001225 | CASP4 | 0.01004367  | CDS  |
| hsa-miR-5581-5p  | NM_001225 | CASP4 | 9.79E-05    | CDS  |
| hsa-miR-5581-3p  | NM_001225 | CASP4 | 0.002870221 | CDS  |
| hsa-miR-5581-3p  | NM_001225 | CASP4 | 0.000806233 | CDS  |
| hsa-miR-5582-3p  | NM_001225 | CASP4 | 0.000437056 | CDS  |
| hsa-miR-5587-5p  | NM_001225 | CASP4 | 4.20E-05    | CDS  |
| hsa-miR-5587-5p  | NM_001225 | CASP4 | 0.000723658 | CDS  |
| hsa-miR-5587-3p  | NM_001225 | CASP4 | 0.00307967  | CDS  |
| hsa-miR-5587-3p  | NM_001225 | CASP4 | 0.003677598 | CDS  |
| hsa-miR-1295b-3p | NM_001225 | CASP4 | 0.000781748 | CDS  |
| hsa-miR-5588-5p  | NM_001225 | CASP4 | 0.000469015 | CDS  |
| hsa-miR-5589-5p  | NM_001225 | CASP4 | 0.006538049 | CDS  |
| hsa-miR-5589-5p  | NM_001225 | CASP4 | 0.000314076 | CDS  |
| hsa-miR-5591-5p  | NM_001225 | CASP4 | 0.004304008 | CDS  |
| hsa-miR-5682     | NM_001225 | CASP4 | 4.82E-05    | CDS  |
| hsa-miR-5683     | NM_001225 | CASP4 | 0.000400512 | CDS  |
| hsa-miR-5683     | NM_001225 | CASP4 | 0.002498367 | CDS  |
| hsa-miR-548ax    | NM_001225 | CASP4 | 0.008535009 | CDS  |
| hsa-miR-548ax    | NM_001225 | CASP4 | 0.1524418   | CDS  |
| hsa-miR-5685     | NM_001225 | CASP4 | 2.02E-05    | CDS  |
| hsa-miR-5689     | NM_001225 | CASP4 | 0.001972543 | CDS  |
| hsa-miR-5698     | NM_001225 | CASP4 | 0.000790121 | CDS  |
| hsa-miR-5699-3p  | NM_001225 | CASP4 | 0.000985936 | CDS  |
| hsa-miR-5702     | NM_001225 | CASP4 | 0.000108611 | CDS  |
| hsa-miR-5704     | NM_001225 | CASP4 | 0.000797533 | CDS  |
| hsa-miR-5705     | NM_001225 | CASP4 | 0.002289318 | CDS  |
| hsa-miR-5787     | NM_001225 | CASP4 | 0.006819084 | 3UTR |
| hsa-miR-5787     | NM_001225 | CASP4 | 0.006733282 | CDS  |

|                 |           |       |             |      |
|-----------------|-----------|-------|-------------|------|
| hsa-miR-6068    | NM_001225 | CASP4 | 2.27E-05    | CDS  |
| hsa-miR-6069    | NM_001225 | CASP4 | 0.006819084 | 3UTR |
| hsa-miR-6069    | NM_001225 | CASP4 | 1.04E-05    | CDS  |
| hsa-miR-6070    | NM_001225 | CASP4 | 0.002228703 | CDS  |
| hsa-miR-6070    | NM_001225 | CASP4 | 0.002728573 | CDS  |
| hsa-miR-6070    | NM_001225 | CASP4 | 0.01017319  | CDS  |
| hsa-miR-6072    | NM_001225 | CASP4 | 0.003175839 | CDS  |
| hsa-miR-6073    | NM_001225 | CASP4 | 0.000427688 | CDS  |
| hsa-miR-6074    | NM_001225 | CASP4 | 0.000604446 | CDS  |
| hsa-miR-6074    | NM_001225 | CASP4 | 0.00922959  | CDS  |
| hsa-miR-6075    | NM_001225 | CASP4 | 0.001122082 | CDS  |
| hsa-miR-6075    | NM_001225 | CASP4 | 0.002517568 | CDS  |
| hsa-miR-6076    | NM_001225 | CASP4 | 0.002303406 | CDS  |
| hsa-miR-6081    | NM_001225 | CASP4 | 0.000427688 | CDS  |
| hsa-miR-6081    | NM_001225 | CASP4 | 0.008535009 | CDS  |
| hsa-miR-6081    | NM_001225 | CASP4 | 0.000768445 | CDS  |
| hsa-miR-6082    | NM_001225 | CASP4 | 0.01995295  | CDS  |
| hsa-miR-6083    | NM_001225 | CASP4 | 0.000515943 | CDS  |
| hsa-miR-6084    | NM_001225 | CASP4 | 0.002160358 | CDS  |
| hsa-miR-6085    | NM_001225 | CASP4 | 0.005598497 | CDS  |
| hsa-miR-6086    | NM_001225 | CASP4 | 0.001671195 | 5UTR |
| hsa-miR-6088    | NM_001225 | CASP4 | 0.001893298 | CDS  |
| hsa-miR-6088    | NM_001225 | CASP4 | 0.000178408 | CDS  |
| hsa-miR-6089    | NM_001225 | CASP4 | 2.70E-05    | CDS  |
| hsa-miR-6090    | NM_001225 | CASP4 | 0.001893298 | CDS  |
| hsa-miR-6124    | NM_001225 | CASP4 | 0.002284785 | CDS  |
| hsa-miR-6125    | NM_001225 | CASP4 | 0.000606734 | CDS  |
| hsa-miR-6125    | NM_001225 | CASP4 | 0.008220982 | CDS  |
| hsa-miR-6127    | NM_001225 | CASP4 | 0.006369709 | 3UTR |
| hsa-miR-6129    | NM_001225 | CASP4 | 0.005133538 | CDS  |
| hsa-miR-6129    | NM_001225 | CASP4 | 0.006276804 | 3UTR |
| hsa-miR-6131    | NM_001225 | CASP4 | 0.001229686 | CDS  |
| hsa-miR-6132    | NM_001225 | CASP4 | 0.005953452 | 3UTR |
| hsa-miR-6499-3p | NM_001225 | CASP4 | 0.008535009 | CDS  |
| hsa-miR-6500-5p | NM_001225 | CASP4 | 0.00011745  | CDS  |
| hsa-miR-6500-5p | NM_001225 | CASP4 | 0.01804151  | CDS  |
| hsa-miR-6500-3p | NM_001225 | CASP4 | 0.001788715 | CDS  |
| hsa-miR-6501-5p | NM_001225 | CASP4 | 0.002079773 | 5UTR |
| hsa-miR-6501-5p | NM_001225 | CASP4 | 0.0218458   | 3UTR |
| hsa-miR-6501-3p | NM_001225 | CASP4 | 1.00E-05    | CDS  |
| hsa-miR-6505-5p | NM_001225 | CASP4 | 0.002923447 | 5UTR |
| hsa-miR-6506-5p | NM_001225 | CASP4 | 2.14E-05    | CDS  |
| hsa-miR-6506-3p | NM_001225 | CASP4 | 0.001122082 | CDS  |
| hsa-miR-6507-3p | NM_001225 | CASP4 | 0.000203446 | CDS  |

|                  |           |       |             |      |
|------------------|-----------|-------|-------------|------|
| hsa-miR-6508-5p  | NM_001225 | CASP4 | 0.000709764 | CDS  |
| hsa-miR-6510-5p  | NM_001225 | CASP4 | 0.0010499   | 5UTR |
| hsa-miR-6510-5p  | NM_001225 | CASP4 | 0.001680409 | CDS  |
| hsa-miR-6511a-3p | NM_001225 | CASP4 | 0.000425086 | CDS  |
| hsa-miR-6512-5p  | NM_001225 | CASP4 | 0.03832425  | CDS  |
| hsa-miR-6512-3p  | NM_001225 | CASP4 | 0.002870221 | CDS  |
| hsa-miR-6514-3p  | NM_001225 | CASP4 | 0.000268314 | CDS  |
| hsa-miR-6515-5p  | NM_001225 | CASP4 | 0.005060872 | 3UTR |
| hsa-miR-6716-5p  | NM_001225 | CASP4 | 4.47E-05    | 5UTR |
| hsa-miR-6716-3p  | NM_001225 | CASP4 | 0.000203446 | CDS  |
| hsa-miR-6717-5p  | NM_001225 | CASP4 | 0.01076079  | CDS  |
| hsa-miR-6717-5p  | NM_001225 | CASP4 | 0.000592024 | CDS  |
| hsa-miR-6511b-5p | NM_001225 | CASP4 | 1.81E-05    | CDS  |
| hsa-miR-6511b-3p | NM_001225 | CASP4 | 0.000425086 | CDS  |
| hsa-miR-6718-5p  | NM_001225 | CASP4 | 0.002095427 | CDS  |
| hsa-miR-6719-3p  | NM_001225 | CASP4 | 0.02104202  | CDS  |
| hsa-miR-6720-5p  | NM_001225 | CASP4 | 0.002870221 | CDS  |
| hsa-miR-6720-3p  | NM_001225 | CASP4 | 4.82E-05    | CDS  |
| hsa-miR-6721-5p  | NM_001225 | CASP4 | 0.006819084 | CDS  |
| hsa-miR-6722-3p  | NM_001225 | CASP4 | 0.001586598 | CDS  |
| hsa-miR-6722-3p  | NM_001225 | CASP4 | 0.000860321 | CDS  |
| hsa-miR-892c-5p  | NM_001225 | CASP4 | 0.000406052 | CDS  |
| hsa-miR-6726-5p  | NM_001225 | CASP4 | 0.002868814 | CDS  |
| hsa-miR-6726-5p  | NM_001225 | CASP4 | 0.000353171 | CDS  |
| hsa-miR-6727-5p  | NM_001225 | CASP4 | 0.000604446 | CDS  |
| hsa-miR-6727-5p  | NM_001225 | CASP4 | 0.1524418   | CDS  |
| hsa-miR-6727-3p  | NM_001225 | CASP4 | 0.01114662  | CDS  |
| hsa-miR-6728-5p  | NM_001225 | CASP4 | 5.52E-05    | CDS  |
| hsa-miR-6729-5p  | NM_001225 | CASP4 | 0.006276804 | 3UTR |
| hsa-miR-6730-5p  | NM_001225 | CASP4 | 0.000662504 | CDS  |
| hsa-miR-6730-5p  | NM_001225 | CASP4 | 0.119458    | CDS  |
| hsa-miR-6731-5p  | NM_001225 | CASP4 | 0.005953452 | 3UTR |
| hsa-miR-6731-5p  | NM_001225 | CASP4 | 0.005133538 | CDS  |
| hsa-miR-6731-5p  | NM_001225 | CASP4 | 0.000556588 | CDS  |
| hsa-miR-6732-5p  | NM_001225 | CASP4 | 0.006276804 | CDS  |
| hsa-miR-6733-5p  | NM_001225 | CASP4 | 0.04494976  | 5UTR |
| hsa-miR-6734-5p  | NM_001225 | CASP4 | 0.012822    | CDS  |
| hsa-miR-6734-5p  | NM_001225 | CASP4 | 0.001357433 | CDS  |
| hsa-miR-6735-5p  | NM_001225 | CASP4 | 0.002698706 | CDS  |
| hsa-miR-6735-5p  | NM_001225 | CASP4 | 0.003534416 | CDS  |
| hsa-miR-6735-3p  | NM_001225 | CASP4 | 0.000141499 | CDS  |
| hsa-miR-6735-3p  | NM_001225 | CASP4 | 0.0151755   | CDS  |
| hsa-miR-6736-5p  | NM_001225 | CASP4 | 0.002861213 | CDS  |
| hsa-miR-6736-3p  | NM_001225 | CASP4 | 0.001140635 | CDS  |

|                 |           |       |             |      |
|-----------------|-----------|-------|-------------|------|
| hsa-miR-6736-3p | NM_001225 | CASP4 | 0.01017319  | CDS  |
| hsa-miR-6736-3p | NM_001225 | CASP4 | 0.00013726  | CDS  |
| hsa-miR-6737-5p | NM_001225 | CASP4 | 0.000335791 | CDS  |
| hsa-miR-6737-5p | NM_001225 | CASP4 | 2.56E-05    | CDS  |
| hsa-miR-6738-5p | NM_001225 | CASP4 | 0.000592024 | CDS  |
| hsa-miR-6738-5p | NM_001225 | CASP4 | 0.000606734 | CDS  |
| hsa-miR-6739-5p | NM_001225 | CASP4 | 0.002284785 | CDS  |
| hsa-miR-6739-3p | NM_001225 | CASP4 | 4.19E-06    | CDS  |
| hsa-miR-6741-5p | NM_001225 | CASP4 | 0.01298236  | 3UTR |
| hsa-miR-6741-5p | NM_001225 | CASP4 | 0.04209539  | CDS  |
| hsa-miR-6741-5p | NM_001225 | CASP4 | 0.000346078 | CDS  |
| hsa-miR-6741-3p | NM_001225 | CASP4 | 0.00013726  | CDS  |
| hsa-miR-6742-3p | NM_001225 | CASP4 | 0.001735767 | CDS  |
| hsa-miR-6743-5p | NM_001225 | CASP4 | 3.43E-05    | CDS  |
| hsa-miR-6743-5p | NM_001225 | CASP4 | 0.005598497 | 3UTR |
| hsa-miR-6743-5p | NM_001225 | CASP4 | 0.01804151  | CDS  |
| hsa-miR-6743-5p | NM_001225 | CASP4 | 0.008948377 | CDS  |
| hsa-miR-6743-3p | NM_001225 | CASP4 | 0.000725653 | CDS  |
| hsa-miR-6743-3p | NM_001225 | CASP4 | 0.007435171 | CDS  |
| hsa-miR-6744-5p | NM_001225 | CASP4 | 0.000178408 | CDS  |
| hsa-miR-6744-3p | NM_001225 | CASP4 | 0.000141499 | CDS  |
| hsa-miR-6745    | NM_001225 | CASP4 | 0.01128548  | CDS  |
| hsa-miR-6745    | NM_001225 | CASP4 | 0.5825232   | CDS  |
| hsa-miR-6745    | NM_001225 | CASP4 | 0.02456692  | CDS  |
| hsa-miR-6746-5p | NM_001225 | CASP4 | 0.001702817 | CDS  |
| hsa-miR-6747-5p | NM_001225 | CASP4 | 0.001671195 | 5UTR |
| hsa-miR-6748-3p | NM_001225 | CASP4 | 0.000585775 | CDS  |
| hsa-miR-6748-3p | NM_001225 | CASP4 | 0.01515751  | CDS  |
| hsa-miR-6750-5p | NM_001225 | CASP4 | 5.15E-05    | 5UTR |
| hsa-miR-6750-5p | NM_001225 | CASP4 | 9.29E-05    | CDS  |
| hsa-miR-6751-5p | NM_001225 | CASP4 | 0.002861213 | CDS  |
| hsa-miR-6751-5p | NM_001225 | CASP4 | 0.000753361 | CDS  |
| hsa-miR-6751-3p | NM_001225 | CASP4 | 0.007669794 | CDS  |
| hsa-miR-6752-5p | NM_001225 | CASP4 | 0.000867817 | CDS  |
| hsa-miR-6752-5p | NM_001225 | CASP4 | 0.005060872 | CDS  |
| hsa-miR-6753-5p | NM_001225 | CASP4 | 0.002761015 | CDS  |
| hsa-miR-6753-3p | NM_001225 | CASP4 | 0.00027619  | CDS  |
| hsa-miR-6753-3p | NM_001225 | CASP4 | 0.000205996 | CDS  |
| hsa-miR-6754-5p | NM_001225 | CASP4 | 0.001351419 | CDS  |
| hsa-miR-6754-5p | NM_001225 | CASP4 | 0.04398309  | CDS  |
| hsa-miR-6754-3p | NM_001225 | CASP4 | 0.003175839 | CDS  |
| hsa-miR-6756-5p | NM_001225 | CASP4 | 0.005598497 | CDS  |
| hsa-miR-6756-5p | NM_001225 | CASP4 | 0.01469811  | CDS  |
| hsa-miR-6756-3p | NM_001225 | CASP4 | 0.008718099 | CDS  |

|                  |           |       |             |      |
|------------------|-----------|-------|-------------|------|
| hsa-miR-6756-3p  | NM_001225 | CASP4 | 0.3628757   | CDS  |
| hsa-miR-6757-5p  | NM_001225 | CASP4 | 0.005598497 | CDS  |
| hsa-miR-6757-5p  | NM_001225 | CASP4 | 0.005569582 | CDS  |
| hsa-miR-6757-5p  | NM_001225 | CASP4 | 0.004667567 | CDS  |
| hsa-miR-6758-5p  | NM_001225 | CASP4 | 0.2188127   | CDS  |
| hsa-miR-6758-5p  | NM_001225 | CASP4 | 0.004667567 | CDS  |
| hsa-miR-6759-5p  | NM_001225 | CASP4 | 0.001586598 | CDS  |
| hsa-miR-6760-5p  | NM_001225 | CASP4 | 0.001680409 | CDS  |
| hsa-miR-6761-5p  | NM_001225 | CASP4 | 2.11E-05    | CDS  |
| hsa-miR-6761-5p  | NM_001225 | CASP4 | 0.002495755 | CDS  |
| hsa-miR-6762-5p  | NM_001225 | CASP4 | 0.000140068 | 5UTR |
| hsa-miR-6762-3p  | NM_001225 | CASP4 | 0.009503041 | 3UTR |
| hsa-miR-6762-3p  | NM_001225 | CASP4 | 0.000723658 | CDS  |
| hsa-miR-6763-5p  | NM_001225 | CASP4 | 0.006276804 | CDS  |
| hsa-miR-6763-5p  | NM_001225 | CASP4 | 0.000172777 | CDS  |
| hsa-miR-6763-3p  | NM_001225 | CASP4 | 0.003175839 | CDS  |
| hsa-miR-6764-5p  | NM_001225 | CASP4 | 0.000234425 | CDS  |
| hsa-miR-6764-5p  | NM_001225 | CASP4 | 0.00307967  | CDS  |
| hsa-miR-6765-5p  | NM_001225 | CASP4 | 0.000867817 | CDS  |
| hsa-miR-6765-5p  | NM_001225 | CASP4 | 1.71E-05    | CDS  |
| hsa-miR-6765-3p  | NM_001225 | CASP4 | 0.001140635 | CDS  |
| hsa-miR-6766-5p  | NM_001225 | CASP4 | 9.29E-05    | CDS  |
| hsa-miR-6766-5p  | NM_001225 | CASP4 | 0.03305347  | CDS  |
| hsa-miR-6766-5p  | NM_001225 | CASP4 | 0.000592024 | CDS  |
| hsa-miR-6767-5p  | NM_001225 | CASP4 | 0.000127802 | CDS  |
| hsa-miR-6767-3p  | NM_001225 | CASP4 | 0.00014848  | CDS  |
| hsa-miR-6767-3p  | NM_001225 | CASP4 | 0.002981617 | CDS  |
| hsa-miR-6768-3p  | NM_001225 | CASP4 | 0.000781748 | CDS  |
| hsa-miR-6769a-5p | NM_001225 | CASP4 | 0.01469811  | CDS  |
| hsa-miR-6769a-5p | NM_001225 | CASP4 | 0.4499833   | CDS  |
| hsa-miR-6769a-3p | NM_001225 | CASP4 | 0.007669794 | CDS  |
| hsa-miR-6770-3p  | NM_001225 | CASP4 | 0.000836616 | CDS  |
| hsa-miR-6771-5p  | NM_001225 | CASP4 | 0.000604446 | CDS  |
| hsa-miR-6771-5p  | NM_001225 | CASP4 | 0.005953452 | CDS  |
| hsa-miR-6772-5p  | NM_001225 | CASP4 | 0.000661315 | CDS  |
| hsa-miR-6772-3p  | NM_001225 | CASP4 | 9.07E-06    | CDS  |
| hsa-miR-6772-3p  | NM_001225 | CASP4 | 0.000922214 | CDS  |
| hsa-miR-6772-3p  | NM_001225 | CASP4 | 0.002429208 | CDS  |
| hsa-miR-6773-5p  | NM_001225 | CASP4 | 0.00438586  | CDS  |
| hsa-miR-6773-5p  | NM_001225 | CASP4 | 0.001122082 | CDS  |
| hsa-miR-6773-3p  | NM_001225 | CASP4 | 0.000725653 | CDS  |
| hsa-miR-6774-5p  | NM_001225 | CASP4 | 3.30E-05    | CDS  |
| hsa-miR-6774-3p  | NM_001225 | CASP4 | 0.000515943 | CDS  |
| hsa-miR-6775-5p  | NM_001225 | CASP4 | 0.000844485 | CDS  |

|                  |           |       |             |      |
|------------------|-----------|-------|-------------|------|
| hsa-miR-6776-5p  | NM_001225 | CASP4 | 0.009055737 | CDS  |
| hsa-miR-6777-5p  | NM_001225 | CASP4 | 0.002868814 | CDS  |
| hsa-miR-6778-5p  | NM_001225 | CASP4 | 0.003193467 | CDS  |
| hsa-miR-6778-5p  | NM_001225 | CASP4 | 0.000844485 | CDS  |
| hsa-miR-6779-5p  | NM_001225 | CASP4 | 0.005953452 | 3UTR |
| hsa-miR-6779-3p  | NM_001225 | CASP4 | 0.007399047 | CDS  |
| hsa-miR-6780a-5p | NM_001225 | CASP4 | 0.00023617  | CDS  |
| hsa-miR-6780a-5p | NM_001225 | CASP4 | 0.005953452 | 3UTR |
| hsa-miR-6780a-3p | NM_001225 | CASP4 | 0.3628757   | CDS  |
| hsa-miR-6781-5p  | NM_001225 | CASP4 | 0.001637462 | CDS  |
| hsa-miR-6781-3p  | NM_001225 | CASP4 | 0.00859865  | 5UTR |
| hsa-miR-6782-5p  | NM_001225 | CASP4 | 0.005598497 | CDS  |
| hsa-miR-6782-5p  | NM_001225 | CASP4 | 0.004667567 | CDS  |
| hsa-miR-6782-5p  | NM_001225 | CASP4 | 0.001117349 | CDS  |
| hsa-miR-6783-5p  | NM_001225 | CASP4 | 5.15E-05    | 5UTR |
| hsa-miR-6783-3p  | NM_001225 | CASP4 | 0.003175839 | CDS  |
| hsa-miR-6783-3p  | NM_001225 | CASP4 | 0.001494617 | CDS  |
| hsa-miR-6784-5p  | NM_001225 | CASP4 | 5.30E-05    | CDS  |
| hsa-miR-6784-5p  | NM_001225 | CASP4 | 0.000837243 | CDS  |
| hsa-miR-6785-5p  | NM_001225 | CASP4 | 2.70E-05    | CDS  |
| hsa-miR-6785-5p  | NM_001225 | CASP4 | 0.005953452 | 3UTR |
| hsa-miR-6785-5p  | NM_001225 | CASP4 | 0.1546664   | CDS  |
| hsa-miR-6785-5p  | NM_001225 | CASP4 | 0.004304008 | CDS  |
| hsa-miR-6786-5p  | NM_001225 | CASP4 | 0.02503297  | CDS  |
| hsa-miR-6787-5p  | NM_001225 | CASP4 | 0.005060872 | 3UTR |
| hsa-miR-6787-3p  | NM_001225 | CASP4 | 0.000293966 | CDS  |
| hsa-miR-6787-3p  | NM_001225 | CASP4 | 2.55E-06    | CDS  |
| hsa-miR-6788-5p  | NM_001225 | CASP4 | 0.02723061  | CDS  |
| hsa-miR-6788-3p  | NM_001225 | CASP4 | 0.000725653 | CDS  |
| hsa-miR-6788-3p  | NM_001225 | CASP4 | 0.000155947 | CDS  |
| hsa-miR-6790-5p  | NM_001225 | CASP4 | 0.01307337  | CDS  |
| hsa-miR-6791-5p  | NM_001225 | CASP4 | 0.000282051 | CDS  |
| hsa-miR-6792-5p  | NM_001225 | CASP4 | 0.03990186  | CDS  |
| hsa-miR-6792-3p  | NM_001225 | CASP4 | 5.70E-05    | CDS  |
| hsa-miR-6793-5p  | NM_001225 | CASP4 | 0.000652818 | 3UTR |
| hsa-miR-6793-5p  | NM_001225 | CASP4 | 0.06230945  | CDS  |
| hsa-miR-6794-5p  | NM_001225 | CASP4 | 9.29E-05    | CDS  |
| hsa-miR-6794-5p  | NM_001225 | CASP4 | 0.002868814 | CDS  |
| hsa-miR-6795-5p  | NM_001225 | CASP4 | 0.000844485 | CDS  |
| hsa-miR-6795-5p  | NM_001225 | CASP4 | 0.001893298 | CDS  |
| hsa-miR-6795-3p  | NM_001225 | CASP4 | 0.000525684 | CDS  |
| hsa-miR-6795-3p  | NM_001225 | CASP4 | 0.3503675   | CDS  |
| hsa-miR-6796-5p  | NM_001225 | CASP4 | 0.000346078 | CDS  |
| hsa-miR-6796-3p  | NM_001225 | CASP4 | 1.04E-05    | CDS  |

|                 |           |       |             |      |
|-----------------|-----------|-------|-------------|------|
| hsa-miR-6797-5p | NM_001225 | CASP4 | 0.005953452 | 3UTR |
| hsa-miR-6797-3p | NM_001225 | CASP4 | 6.22E-06    | CDS  |
| hsa-miR-6797-3p | NM_001225 | CASP4 | 0.000268314 | CDS  |
| hsa-miR-6798-5p | NM_001225 | CASP4 | 0.005953452 | CDS  |
| hsa-miR-6798-5p | NM_001225 | CASP4 | 0.002981617 | CDS  |
| hsa-miR-6799-3p | NM_001225 | CASP4 | 2.02E-05    | CDS  |
| hsa-miR-6800-5p | NM_001225 | CASP4 | 2.70E-05    | CDS  |
| hsa-miR-6800-3p | NM_001225 | CASP4 | 6.19E-05    | CDS  |
| hsa-miR-6801-5p | NM_001225 | CASP4 | 0.004176603 | CDS  |
| hsa-miR-6802-5p | NM_001225 | CASP4 | 5.52E-05    | CDS  |
| hsa-miR-6803-5p | NM_001225 | CASP4 | 0.000690717 | CDS  |
| hsa-miR-6803-5p | NM_001225 | CASP4 | 0.000606734 | CDS  |
| hsa-miR-6804-5p | NM_001225 | CASP4 | 0.02104202  | CDS  |
| hsa-miR-6805-5p | NM_001225 | CASP4 | 3.08E-05    | 5UTR |
| hsa-miR-6806-5p | NM_001225 | CASP4 | 0.000427548 | CDS  |
| hsa-miR-6806-5p | NM_001225 | CASP4 | 0.01274028  | CDS  |
| hsa-miR-6806-3p | NM_001225 | CASP4 | 0.01017319  | CDS  |
| hsa-miR-6807-3p | NM_001225 | CASP4 | 6.27E-05    | CDS  |
| hsa-miR-6807-3p | NM_001225 | CASP4 | 0.002472239 | CDS  |
| hsa-miR-6807-3p | NM_001225 | CASP4 | 0.004658662 | CDS  |
| hsa-miR-6808-5p | NM_001225 | CASP4 | 0.001680409 | CDS  |
| hsa-miR-6810-5p | NM_001225 | CASP4 | 0.001074767 | CDS  |
| hsa-miR-6811-5p | NM_001225 | CASP4 | 2.20E-05    | CDS  |
| hsa-miR-6811-3p | NM_001225 | CASP4 | 0.007399047 | CDS  |
| hsa-miR-6812-5p | NM_001225 | CASP4 | 0.003791162 | CDS  |
| hsa-miR-6813-5p | NM_001225 | CASP4 | 0.005598497 | CDS  |
| hsa-miR-6814-5p | NM_001225 | CASP4 | 0.000172777 | CDS  |
| hsa-miR-6814-5p | NM_001225 | CASP4 | 0.04398309  | CDS  |
| hsa-miR-6815-5p | NM_001225 | CASP4 | 4.36E-05    | CDS  |
| hsa-miR-6815-5p | NM_001225 | CASP4 | 0.03887933  | 5UTR |
| hsa-miR-6815-3p | NM_001225 | CASP4 | 0.002304037 | CDS  |
| hsa-miR-6816-5p | NM_001225 | CASP4 | 0.008948377 | CDS  |
| hsa-miR-6816-5p | NM_001225 | CASP4 | 0.006276804 | 3UTR |
| hsa-miR-6817-3p | NM_001225 | CASP4 | 2.55E-06    | CDS  |
| hsa-miR-6817-3p | NM_001225 | CASP4 | 0.000386263 | CDS  |
| hsa-miR-6818-5p | NM_001225 | CASP4 | 0.01302503  | CDS  |
| hsa-miR-6818-5p | NM_001225 | CASP4 | 0.290863    | CDS  |
| hsa-miR-6818-3p | NM_001225 | CASP4 | 5.86E-05    | CDS  |
| hsa-miR-6819-5p | NM_001225 | CASP4 | 2.56E-05    | CDS  |
| hsa-miR-6819-3p | NM_001225 | CASP4 | 2.59E-05    | CDS  |
| hsa-miR-6819-3p | NM_001225 | CASP4 | 5.71E-05    | 5UTR |
| hsa-miR-6820-5p | NM_001225 | CASP4 | 0.000702167 | CDS  |
| hsa-miR-6821-5p | NM_001225 | CASP4 | 0.000248728 | CDS  |
| hsa-miR-6821-5p | NM_001225 | CASP4 | 2.70E-05    | CDS  |

|                  |           |       |             |      |
|------------------|-----------|-------|-------------|------|
| hsa-miR-6822-3p  | NM_001225 | CASP4 | 8.39E-06    | CDS  |
| hsa-miR-6822-3p  | NM_001225 | CASP4 | 2.59E-05    | CDS  |
| hsa-miR-6822-3p  | NM_001225 | CASP4 | 0.000141499 | CDS  |
| hsa-miR-6823-5p  | NM_001225 | CASP4 | 0.006369709 | 3UTR |
| hsa-miR-6823-5p  | NM_001225 | CASP4 | 0.0010499   | 5UTR |
| hsa-miR-6823-3p  | NM_001225 | CASP4 | 0.000248963 | CDS  |
| hsa-miR-6824-5p  | NM_001225 | CASP4 | 0.001321211 | CDS  |
| hsa-miR-6824-5p  | NM_001225 | CASP4 | 0.000215353 | CDS  |
| hsa-miR-6824-5p  | NM_001225 | CASP4 | 0.005953452 | 3UTR |
| hsa-miR-6824-3p  | NM_001225 | CASP4 | 0.000386263 | CDS  |
| hsa-miR-6824-3p  | NM_001225 | CASP4 | 0.002945966 | CDS  |
| hsa-miR-6825-5p  | NM_001225 | CASP4 | 0.02456692  | CDS  |
| hsa-miR-6825-5p  | NM_001225 | CASP4 | 0.000867817 | CDS  |
| hsa-miR-6825-3p  | NM_001225 | CASP4 | 5.70E-05    | CDS  |
| hsa-miR-6825-3p  | NM_001225 | CASP4 | 0.02147881  | CDS  |
| hsa-miR-6826-5p  | NM_001225 | CASP4 | 0.008560229 | CDS  |
| hsa-miR-6826-3p  | NM_001225 | CASP4 | 0.3503675   | CDS  |
| hsa-miR-6827-5p  | NM_001225 | CASP4 | 0.004304008 | CDS  |
| hsa-miR-6827-5p  | NM_001225 | CASP4 | 9.55E-05    | CDS  |
| hsa-miR-6827-3p  | NM_001225 | CASP4 | 5.86E-05    | CDS  |
| hsa-miR-6828-3p  | NM_001225 | CASP4 | 0.007435171 | CDS  |
| hsa-miR-6829-5p  | NM_001225 | CASP4 | 0.01298236  | 3UTR |
| hsa-miR-6829-3p  | NM_001225 | CASP4 | 0.000102933 | 5UTR |
| hsa-miR-6830-5p  | NM_001225 | CASP4 | 0.001702817 | CDS  |
| hsa-miR-6830-3p  | NM_001225 | CASP4 | 0.002462912 | CDS  |
| hsa-miR-6831-5p  | NM_001225 | CASP4 | 0.000190781 | CDS  |
| hsa-miR-6832-3p  | NM_001225 | CASP4 | 0.4669817   | CDS  |
| hsa-miR-6833-5p  | NM_001225 | CASP4 | 0.01049294  | CDS  |
| hsa-miR-6833-5p  | NM_001225 | CASP4 | 0.0357771   | CDS  |
| hsa-miR-6833-3p  | NM_001225 | CASP4 | 0.000386263 | CDS  |
| hsa-miR-6833-3p  | NM_001225 | CASP4 | 0.001494617 | CDS  |
| hsa-miR-6834-5p  | NM_001225 | CASP4 | 0.005208109 | 3UTR |
| hsa-miR-6834-5p  | NM_001225 | CASP4 | 0.001321211 | CDS  |
| hsa-miR-6834-5p  | NM_001225 | CASP4 | 0.004418741 | CDS  |
| hsa-miR-6834-3p  | NM_001225 | CASP4 | 0.000155947 | CDS  |
| hsa-miR-6835-5p  | NM_001225 | CASP4 | 0.002558787 | CDS  |
| hsa-miR-6835-5p  | NM_001225 | CASP4 | 0.000867817 | CDS  |
| hsa-miR-6780b-5p | NM_001225 | CASP4 | 0.006276804 | CDS  |
| hsa-miR-6780b-5p | NM_001225 | CASP4 | 0.001074767 | CDS  |
| hsa-miR-6780b-3p | NM_001225 | CASP4 | 0.000525684 | CDS  |
| hsa-miR-6836-5p  | NM_001225 | CASP4 | 0.000818056 | CDS  |
| hsa-miR-6836-5p  | NM_001225 | CASP4 | 2.09E-05    | CDS  |
| hsa-miR-6837-5p  | NM_001225 | CASP4 | 2.14E-05    | CDS  |
| hsa-miR-6837-5p  | NM_001225 | CASP4 | 0.000587308 | CDS  |



|                 |           |       |             |      |
|-----------------|-----------|-------|-------------|------|
| hsa-miR-6838-3p | NM_001225 | CASP4 | 0.01629919  | CDS  |
| hsa-miR-6839-3p | NM_001225 | CASP4 | 0.4382198   | CDS  |
| hsa-miR-6840-5p | NM_001225 | CASP4 | 0.00307967  | CDS  |
| hsa-miR-6840-3p | NM_001225 | CASP4 | 0.000564804 | CDS  |
| hsa-miR-6841-5p | NM_001225 | CASP4 | 0.04308311  | 5UTR |
| hsa-miR-6841-3p | NM_001225 | CASP4 | 0.001058085 | CDS  |
| hsa-miR-6842-5p | NM_001225 | CASP4 | 8.84E-05    | CDS  |
| hsa-miR-6842-5p | NM_001225 | CASP4 | 3.08E-05    | 5UTR |
| hsa-miR-6843-3p | NM_001225 | CASP4 | 7.32E-05    | CDS  |
| hsa-miR-6845-5p | NM_001225 | CASP4 | 0.00023335  | CDS  |
| hsa-miR-6845-3p | NM_001225 | CASP4 | 0.001058085 | CDS  |
| hsa-miR-6846-5p | NM_001225 | CASP4 | 0.001117349 | CDS  |
| hsa-miR-6846-5p | NM_001225 | CASP4 | 2.20E-05    | CDS  |
| hsa-miR-6846-3p | NM_001225 | CASP4 | 0.0001625   | CDS  |
| hsa-miR-6846-3p | NM_001225 | CASP4 | 0.007669794 | CDS  |
| hsa-miR-6847-5p | NM_001225 | CASP4 | 0.000256036 | CDS  |
| hsa-miR-6847-5p | NM_001225 | CASP4 | 0.000717477 | CDS  |
| hsa-miR-6847-5p | NM_001225 | CASP4 | 0.002761015 | CDS  |
| hsa-miR-6847-3p | NM_001225 | CASP4 | 0.007399047 | CDS  |
| hsa-miR-6847-3p | NM_001225 | CASP4 | 0.000429816 | CDS  |
| hsa-miR-6848-5p | NM_001225 | CASP4 | 0.005208109 | CDS  |
| hsa-miR-6848-3p | NM_001225 | CASP4 | 2.59E-05    | CDS  |
| hsa-miR-6848-3p | NM_001225 | CASP4 | 0.000328221 | CDS  |
| hsa-miR-6849-5p | NM_001225 | CASP4 | 0.004667567 | CDS  |
| hsa-miR-6849-3p | NM_001225 | CASP4 | 5.69E-05    | 5UTR |
| hsa-miR-6849-3p | NM_001225 | CASP4 | 9.29E-05    | CDS  |
| hsa-miR-6850-5p | NM_001225 | CASP4 | 0.001321211 | CDS  |
| hsa-miR-6850-5p | NM_001225 | CASP4 | 4.32E-05    | CDS  |
| hsa-miR-6850-3p | NM_001225 | CASP4 | 0.1249021   | CDS  |
| hsa-miR-6851-5p | NM_001225 | CASP4 | 0.000933598 | CDS  |
| hsa-miR-6851-5p | NM_001225 | CASP4 | 2.56E-05    | CDS  |
| hsa-miR-6851-5p | NM_001225 | CASP4 | 8.84E-05    | CDS  |
| hsa-miR-6851-3p | NM_001225 | CASP4 | 0.004080075 | CDS  |
| hsa-miR-6852-5p | NM_001225 | CASP4 | 0.000872079 | CDS  |
| hsa-miR-6852-5p | NM_001225 | CASP4 | 9.79E-05    | CDS  |
| hsa-miR-6852-5p | NM_001225 | CASP4 | 0.004819847 | CDS  |
| hsa-miR-6852-3p | NM_001225 | CASP4 | 9.47E-05    | CDS  |
| hsa-miR-6853-5p | NM_001225 | CASP4 | 0.001910621 | CDS  |
| hsa-miR-6855-5p | NM_001225 | CASP4 | 0.005598497 | CDS  |
| hsa-miR-6855-5p | NM_001225 | CASP4 | 0.001063228 | CDS  |
| hsa-miR-6855-3p | NM_001225 | CASP4 | 1.38E-05    | CDS  |
| hsa-miR-6856-3p | NM_001225 | CASP4 | 0.007399047 | CDS  |
| hsa-miR-6856-3p | NM_001225 | CASP4 | 0.000400512 | CDS  |
| hsa-miR-6858-5p | NM_001225 | CASP4 | 0.000215353 | CDS  |

|                  |           |       |             |      |
|------------------|-----------|-------|-------------|------|
| hsa-miR-6858-5p  | NM_001225 | CASP4 | 0.006276804 | CDS  |
| hsa-miR-6859-5p  | NM_001225 | CASP4 | 0.001000701 | CDS  |
| hsa-miR-6859-3p  | NM_001225 | CASP4 | 6.22E-06    | CDS  |
| hsa-miR-6769b-5p | NM_001225 | CASP4 | 0.01049294  | CDS  |
| hsa-miR-6769b-3p | NM_001225 | CASP4 | 0.000386263 | CDS  |
| hsa-miR-6861-5p  | NM_001225 | CASP4 | 0.000748699 | CDS  |
| hsa-miR-6861-5p  | NM_001225 | CASP4 | 0.005953452 | CDS  |
| hsa-miR-6862-5p  | NM_001225 | CASP4 | 0.000353171 | CDS  |
| hsa-miR-6862-5p  | NM_001225 | CASP4 | 0.01412757  | CDS  |
| hsa-miR-6862-3p  | NM_001225 | CASP4 | 2.55E-06    | CDS  |
| hsa-miR-6862-3p  | NM_001225 | CASP4 | 0.00307967  | CDS  |
| hsa-miR-6865-5p  | NM_001225 | CASP4 | 0.000190781 | CDS  |
| hsa-miR-6865-5p  | NM_001225 | CASP4 | 4.36E-05    | CDS  |
| hsa-miR-6865-5p  | NM_001225 | CASP4 | 0.000867817 | CDS  |
| hsa-miR-6865-3p  | NM_001225 | CASP4 | 2.02E-05    | CDS  |
| hsa-miR-6867-5p  | NM_001225 | CASP4 | 0.01198467  | CDS  |
| hsa-miR-6868-3p  | NM_001225 | CASP4 | 0.178672    | CDS  |
| hsa-miR-6869-3p  | NM_001225 | CASP4 | 8.39E-06    | CDS  |
| hsa-miR-6870-5p  | NM_001225 | CASP4 | 0.000606734 | CDS  |
| hsa-miR-6870-5p  | NM_001225 | CASP4 | 0.02834176  | 3UTR |
| hsa-miR-6870-5p  | NM_001225 | CASP4 | 0.5825232   | CDS  |
| hsa-miR-6870-3p  | NM_001225 | CASP4 | 0.01403179  | CDS  |
| hsa-miR-6871-5p  | NM_001225 | CASP4 | 0.004418741 | CDS  |
| hsa-miR-6871-5p  | NM_001225 | CASP4 | 0.000790121 | CDS  |
| hsa-miR-6871-5p  | NM_001225 | CASP4 | 0.1004401   | CDS  |
| hsa-miR-6871-5p  | NM_001225 | CASP4 | 0.005762653 | CDS  |
| hsa-miR-6871-3p  | NM_001225 | CASP4 | 0.00124429  | CDS  |
| hsa-miR-6871-3p  | NM_001225 | CASP4 | 4.82E-05    | CDS  |
| hsa-miR-6872-3p  | NM_001225 | CASP4 | 0.00859865  | 5UTR |
| hsa-miR-6872-3p  | NM_001225 | CASP4 | 0.002982281 | CDS  |
| hsa-miR-6872-3p  | NM_001225 | CASP4 | 0.000614096 | CDS  |
| hsa-miR-6873-5p  | NM_001225 | CASP4 | 0.002761015 | CDS  |
| hsa-miR-6873-3p  | NM_001225 | CASP4 | 0.003929355 | CDS  |
| hsa-miR-6874-3p  | NM_001225 | CASP4 | 0.001560491 | CDS  |
| hsa-miR-6874-3p  | NM_001225 | CASP4 | 0.001788715 | CDS  |
| hsa-miR-6874-3p  | NM_001225 | CASP4 | 8.39E-06    | CDS  |
| hsa-miR-6875-5p  | NM_001225 | CASP4 | 0.001074767 | CDS  |
| hsa-miR-6875-3p  | NM_001225 | CASP4 | 0.002870221 | CDS  |
| hsa-miR-6876-5p  | NM_001225 | CASP4 | 0.001680409 | CDS  |
| hsa-miR-6876-3p  | NM_001225 | CASP4 | 0.01713811  | CDS  |
| hsa-miR-6877-5p  | NM_001225 | CASP4 | 0.000592024 | CDS  |
| hsa-miR-6877-5p  | NM_001225 | CASP4 | 0.000781748 | CDS  |
| hsa-miR-6877-3p  | NM_001225 | CASP4 | 5.69E-05    | 5UTR |
| hsa-miR-6878-3p  | NM_001225 | CASP4 | 0.3503675   | CDS  |

|                 |           |       |             |      |
|-----------------|-----------|-------|-------------|------|
| hsa-miR-6879-5p | NM_001225 | CASP4 | 0.1530227   | CDS  |
| hsa-miR-6879-5p | NM_001225 | CASP4 | 0.005598497 | CDS  |
| hsa-miR-6880-5p | NM_001225 | CASP4 | 0.000723216 | CDS  |
| hsa-miR-6880-3p | NM_001225 | CASP4 | 0.000127802 | CDS  |
| hsa-miR-6881-5p | NM_001225 | CASP4 | 0.00080334  | CDS  |
| hsa-miR-6881-5p | NM_001225 | CASP4 | 0.002861213 | CDS  |
| hsa-miR-6881-5p | NM_001225 | CASP4 | 0.02834176  | 3UTR |
| hsa-miR-6881-3p | NM_001225 | CASP4 | 0.3628757   | CDS  |
| hsa-miR-6881-3p | NM_001225 | CASP4 | 0.002462912 | CDS  |
| hsa-miR-6881-3p | NM_001225 | CASP4 | 0.005658901 | CDS  |
| hsa-miR-6882-3p | NM_001225 | CASP4 | 0.002429208 | CDS  |
| hsa-miR-6883-5p | NM_001225 | CASP4 | 0.006369709 | 3UTR |
| hsa-miR-6885-5p | NM_001225 | CASP4 | 0.005953452 | CDS  |
| hsa-miR-6886-3p | NM_001225 | CASP4 | 0.000131593 | CDS  |
| hsa-miR-6887-5p | NM_001225 | CASP4 | 0.000844485 | CDS  |
| hsa-miR-6889-5p | NM_001225 | CASP4 | 0.01804151  | CDS  |
| hsa-miR-6889-5p | NM_001225 | CASP4 | 0.001000701 | CDS  |
| hsa-miR-6890-3p | NM_001225 | CASP4 | 0.001140635 | CDS  |
| hsa-miR-6891-5p | NM_001225 | CASP4 | 0.001637462 | CDS  |
| hsa-miR-6891-5p | NM_001225 | CASP4 | 0.000867817 | CDS  |
| hsa-miR-6893-5p | NM_001225 | CASP4 | 0.00104551  | CDS  |
| hsa-miR-6893-3p | NM_001225 | CASP4 | 0.000525684 | CDS  |
| hsa-miR-6894-5p | NM_001225 | CASP4 | 0.000867817 | CDS  |
| hsa-miR-6894-3p | NM_001225 | CASP4 | 0.3503675   | CDS  |
| hsa-miR-6895-5p | NM_001225 | CASP4 | 0.002150872 | CDS  |
| hsa-miR-7106-5p | NM_001225 | CASP4 | 0.000647898 | CDS  |
| hsa-miR-7106-5p | NM_001225 | CASP4 | 0.02264435  | CDS  |
| hsa-miR-7106-5p | NM_001225 | CASP4 | 0.006369709 | 3UTR |
| hsa-miR-7106-3p | NM_001225 | CASP4 | 0.01017319  | CDS  |
| hsa-miR-7107-5p | NM_001225 | CASP4 | 0.002526276 | CDS  |
| hsa-miR-7107-5p | NM_001225 | CASP4 | 0.000592024 | CDS  |
| hsa-miR-7107-5p | NM_001225 | CASP4 | 4.34E-05    | CDS  |
| hsa-miR-7107-3p | NM_001225 | CASP4 | 0.001427036 | CDS  |
| hsa-miR-7107-3p | NM_001225 | CASP4 | 0.001332125 | CDS  |
| hsa-miR-7108-5p | NM_001225 | CASP4 | 0.002980244 | CDS  |
| hsa-miR-7108-5p | NM_001225 | CASP4 | 3.30E-05    | CDS  |
| hsa-miR-7108-3p | NM_001225 | CASP4 | 0.001140635 | CDS  |
| hsa-miR-7109-5p | NM_001225 | CASP4 | 0.000172777 | CDS  |
| hsa-miR-7110-5p | NM_001225 | CASP4 | 0.005208109 | CDS  |
| hsa-miR-7110-5p | NM_001225 | CASP4 | 0.3492843   | CDS  |
| hsa-miR-7110-5p | NM_001225 | CASP4 | 0.000651958 | CDS  |
| hsa-miR-7110-5p | NM_001225 | CASP4 | 0.01007283  | CDS  |
| hsa-miR-7110-3p | NM_001225 | CASP4 | 0.000386263 | CDS  |
| hsa-miR-7111-5p | NM_001225 | CASP4 | 0.000606734 | CDS  |

|                  |           |       |             |      |
|------------------|-----------|-------|-------------|------|
| hsa-miR-7111-3p  | NM_001225 | CASP4 | 0.3503675   | CDS  |
| hsa-miR-7112-5p  | NM_001225 | CASP4 | 2.78E-05    | CDS  |
| hsa-miR-7112-3p  | NM_001225 | CASP4 | 0.004658662 | CDS  |
| hsa-miR-7112-3p  | NM_001225 | CASP4 | 0.00859865  | 5UTR |
| hsa-miR-7113-5p  | NM_001225 | CASP4 | 2.93E-05    | CDS  |
| hsa-miR-7113-5p  | NM_001225 | CASP4 | 0.000872079 | CDS  |
| hsa-miR-7113-3p  | NM_001225 | CASP4 | 0.003175839 | CDS  |
| hsa-miR-7114-5p  | NM_001225 | CASP4 | 0.000155947 | CDS  |
| hsa-miR-7114-5p  | NM_001225 | CASP4 | 0.0680779   | CDS  |
| hsa-miR-7114-3p  | NM_001225 | CASP4 | 6.22E-06    | CDS  |
| hsa-miR-7151-5p  | NM_001225 | CASP4 | 0.002728573 | CDS  |
| hsa-miR-7151-3p  | NM_001225 | CASP4 | 0.002569453 | 5UTR |
| hsa-miR-7152-3p  | NM_001225 | CASP4 | 4.61E-06    | CDS  |
| hsa-miR-7152-3p  | NM_001225 | CASP4 | 0.004127298 | CDS  |
| hsa-miR-7154-3p  | NM_001225 | CASP4 | 0.001893298 | CDS  |
| hsa-miR-7154-3p  | NM_001225 | CASP4 | 0.1524418   | CDS  |
| hsa-miR-7155-3p  | NM_001225 | CASP4 | 6.22E-06    | CDS  |
| hsa-miR-7156-5p  | NM_001225 | CASP4 | 9.07E-06    | CDS  |
| hsa-miR-7156-3p  | NM_001225 | CASP4 | 0.000127802 | CDS  |
| hsa-miR-7157-3p  | NM_001225 | CASP4 | 0.0680779   | CDS  |
| hsa-miR-7158-5p  | NM_001225 | CASP4 | 0.002728573 | CDS  |
| hsa-miR-7158-5p  | NM_001225 | CASP4 | 0.000429816 | CDS  |
| hsa-miR-7158-5p  | NM_001225 | CASP4 | 4.05E-05    | 5UTR |
| hsa-miR-7161-5p  | NM_001225 | CASP4 | 0.000316826 | CDS  |
| hsa-miR-7161-3p  | NM_001225 | CASP4 | 0.000517607 | CDS  |
| hsa-miR-7161-3p  | NM_001225 | CASP4 | 1.06E-05    | CDS  |
| hsa-miR-7160-5p  | NM_001225 | CASP4 | 0.005133538 | CDS  |
| hsa-miR-7160-5p  | NM_001225 | CASP4 | 0.000343441 | CDS  |
| hsa-miR-7160-3p  | NM_001225 | CASP4 | 0.01804151  | CDS  |
| hsa-miR-7160-3p  | NM_001225 | CASP4 | 0.000633984 | CDS  |
| hsa-miR-7162-5p  | NM_001225 | CASP4 | 0.19092     | CDS  |
| hsa-miR-7162-3p  | NM_001225 | CASP4 | 0.000335791 | CDS  |
| hsa-miR-7515     | NM_001225 | CASP4 | 0.02336121  | CDS  |
| hsa-miR-7702     | NM_001225 | CASP4 | 0.000709764 | CDS  |
| hsa-miR-7703     | NM_001225 | CASP4 | 5.70E-05    | CDS  |
| hsa-miR-7705     | NM_001225 | CASP4 | 0.01403179  | CDS  |
| hsa-miR-7706     | NM_001225 | CASP4 | 4.82E-05    | CDS  |
| hsa-miR-7706     | NM_001225 | CASP4 | 0.000379457 | CDS  |
| hsa-miR-7706     | NM_001225 | CASP4 | 0.004846782 | CDS  |
| hsa-miR-7843-5p  | NM_001225 | CASP4 | 0.02114427  | CDS  |
| hsa-miR-7843-3p  | NM_001225 | CASP4 | 0.000294115 | CDS  |
| hsa-miR-7843-3p  | NM_001225 | CASP4 | 0.004846782 | CDS  |
| hsa-miR-4433b-3p | NM_001225 | CASP4 | 0.04098359  | 3UTR |
| hsa-miR-4433b-3p | NM_001225 | CASP4 | 4.39E-05    | CDS  |

|                  |           |       |             |      |
|------------------|-----------|-------|-------------|------|
| hsa-miR-4433b-3p | NM_001225 | CASP4 | 0.001680409 | CDS  |
| hsa-miR-1273h-5p | NM_001225 | CASP4 | 0.005953452 | 3UTR |
| hsa-miR-1273h-5p | NM_001225 | CASP4 | 0.00023617  | CDS  |
| hsa-miR-1273h-3p | NM_001225 | CASP4 | 0.000127802 | CDS  |
| hsa-miR-7844-5p  | NM_001225 | CASP4 | 4.84E-05    | CDS  |
| hsa-miR-7844-5p  | NM_001225 | CASP4 | 0.003677598 | CDS  |
| hsa-miR-7845-5p  | NM_001225 | CASP4 | 0.001637462 | CDS  |
| hsa-miR-7846-3p  | NM_001225 | CASP4 | 2.70E-05    | CDS  |
| hsa-miR-7846-3p  | NM_001225 | CASP4 | 0.0010499   | 5UTR |
| hsa-miR-7846-3p  | NM_001225 | CASP4 | 0.000155666 | CDS  |
| hsa-miR-7847-3p  | NM_001225 | CASP4 | 0.002761015 | CDS  |
| hsa-miR-7848-3p  | NM_001225 | CASP4 | 8.36E-06    | CDS  |
| hsa-miR-7849-3p  | NM_001225 | CASP4 | 0.000572465 | CDS  |
| hsa-miR-7850-5p  | NM_001225 | CASP4 | 5.30E-05    | CDS  |
| hsa-miR-7851-3p  | NM_001225 | CASP4 | 0.001735767 | CDS  |
| hsa-miR-7855-5p  | NM_001225 | CASP4 | 0.002990015 | CDS  |
| hsa-miR-7855-5p  | NM_001225 | CASP4 | 0.002315533 | CDS  |
| hsa-miR-7978     | NM_001225 | CASP4 | 0.000873931 | CDS  |
| hsa-miR-8052     | NM_001225 | CASP4 | 0.001637462 | CDS  |
| hsa-miR-8052     | NM_001225 | CASP4 | 0.00023335  | CDS  |
| hsa-miR-8052     | NM_001225 | CASP4 | 4.39E-05    | CDS  |
| hsa-miR-8056     | NM_001225 | CASP4 | 0.000131593 | CDS  |
| hsa-miR-8056     | NM_001225 | CASP4 | 0.002674584 | CDS  |
| hsa-miR-8058     | NM_001225 | CASP4 | 0.000973686 | CDS  |
| hsa-miR-8059     | NM_001225 | CASP4 | 0.01800674  | CDS  |
| hsa-miR-8060     | NM_001225 | CASP4 | 0.000592176 | CDS  |
| hsa-miR-8060     | NM_001225 | CASP4 | 0.003747754 | CDS  |
| hsa-miR-8069     | NM_001225 | CASP4 | 0.005060872 | 3UTR |
| hsa-miR-8069     | NM_001225 | CASP4 | 0.004285404 | CDS  |
| hsa-miR-8069     | NM_001225 | CASP4 | 0.006421811 | CDS  |
| hsa-miR-8072     | NM_001225 | CASP4 | 0.002526276 | CDS  |
| hsa-miR-8072     | NM_001225 | CASP4 | 0.003193467 | CDS  |
| hsa-miR-8075     | NM_001225 | CASP4 | 0.007814787 | CDS  |
| hsa-miR-8075     | NM_001225 | CASP4 | 0.000248728 | CDS  |
| hsa-miR-8075     | NM_001225 | CASP4 | 0.000836616 | CDS  |
| hsa-miR-8077     | NM_001225 | CASP4 | 0.000314076 | CDS  |
| hsa-miR-8077     | NM_001225 | CASP4 | 7.30E-05    | CDS  |
| hsa-miR-8077     | NM_001225 | CASP4 | 0.001122082 | CDS  |
| hsa-miR-8077     | NM_001225 | CASP4 | 0.000702167 | CDS  |
| hsa-miR-8078     | NM_001225 | CASP4 | 0.00293118  | CDS  |
| hsa-miR-8078     | NM_001225 | CASP4 | 0.000887313 | CDS  |
| hsa-miR-8078     | NM_001225 | CASP4 | 0.001652899 | CDS  |
| hsa-miR-8081     | NM_001225 | CASP4 | 8.78E-05    | CDS  |
| hsa-miR-8081     | NM_001225 | CASP4 | 0.000211201 | CDS  |

|                   |           |       |             |      |
|-------------------|-----------|-------|-------------|------|
| hsa-miR-8082      | NM_001225 | CASP4 | 0.005133538 | CDS  |
| hsa-miR-8087      | NM_001225 | CASP4 | 0.000689104 | 3UTR |
| hsa-miR-8088      | NM_001225 | CASP4 | 0.008560229 | CDS  |
| hsa-miR-8089      | NM_001225 | CASP4 | 3.30E-05    | CDS  |
| hsa-miR-8089      | NM_001225 | CASP4 | 0.002861213 | CDS  |
| hsa-miR-9500      | NM_001225 | CASP4 | 0.02336121  | CDS  |
| hsa-miR-9500      | NM_001225 | CASP4 | 0.002284785 | CDS  |
| hsa-miR-9718      | NM_001225 | CASP4 | 0.004480019 | CDS  |
| hsa-miR-9718      | NM_001225 | CASP4 | 0.000922214 | CDS  |
| hsa-miR-9899      | NM_001225 | CASP4 | 0.00124429  | CDS  |
| hsa-miR-9901      | NM_001225 | CASP4 | 0.000723658 | CDS  |
| hsa-miR-1843      | NM_001225 | CASP4 | 1.16E-05    | CDS  |
| hsa-miR-1843      | NM_001225 | CASP4 | 4.05E-05    | 5UTR |
| hsa-miR-9986      | NM_001225 | CASP4 | 0.001321211 | CDS  |
| hsa-miR-9986      | NM_001225 | CASP4 | 0.002472239 | CDS  |
| hsa-miR-10392-5p  | NM_001225 | CASP4 | 0.000635321 | 3UTR |
| hsa-miR-10392-5p  | NM_001225 | CASP4 | 4.82E-05    | CDS  |
| hsa-miR-10393-3p  | NM_001225 | CASP4 | 9.92E-06    | CDS  |
| hsa-miR-10393-3p  | NM_001225 | CASP4 | 0.001998536 | CDS  |
| hsa-miR-10394-5p  | NM_001225 | CASP4 | 4.61E-06    | CDS  |
| hsa-miR-10394-3p  | NM_001225 | CASP4 | 0.000248963 | CDS  |
| hsa-miR-10394-3p  | NM_001225 | CASP4 | 0.01298236  | CDS  |
| hsa-miR-10395-5p  | NM_001225 | CASP4 | 0.2935726   | CDS  |
| hsa-miR-10396a-5p | NM_001225 | CASP4 | 0.001229686 | CDS  |
| hsa-miR-10396a-3p | NM_001225 | CASP4 | 0.001474321 | CDS  |
| hsa-miR-10397-5p  | NM_001225 | CASP4 | 0.002623219 | 5UTR |
| hsa-miR-10397-3p  | NM_001225 | CASP4 | 0.004002583 | CDS  |
| hsa-miR-10398-5p  | NM_001225 | CASP4 | 0.000797533 | CDS  |
| hsa-miR-10398-3p  | NM_001225 | CASP4 | 0.000526877 | CDS  |
| hsa-miR-10399-3p  | NM_001225 | CASP4 | 0.000907136 | CDS  |
| hsa-miR-10399-3p  | NM_001225 | CASP4 | 0.000526877 | CDS  |
| hsa-miR-10400-5p  | NM_001225 | CASP4 | 0.002981617 | CDS  |
| hsa-miR-10400-5p  | NM_001225 | CASP4 | 0.000427688 | CDS  |
| hsa-miR-10400-5p  | NM_001225 | CASP4 | 0.1546664   | CDS  |
| hsa-miR-10400-3p  | NM_001225 | CASP4 | 4.48E-05    | CDS  |
| hsa-miR-10401-5p  | NM_001225 | CASP4 | 0.006073437 | CDS  |
| hsa-miR-10401-5p  | NM_001225 | CASP4 | 0.002761015 | CDS  |
| hsa-miR-10396b-5p | NM_001225 | CASP4 | 0.002228703 | CDS  |
| hsa-miR-10396b-3p | NM_001225 | CASP4 | 9.12E-06    | CDS  |
| hsa-miR-10396b-3p | NM_001225 | CASP4 | 0.001474321 | CDS  |
| hsa-miR-10523-5p  | NM_001225 | CASP4 | 0.000572465 | CDS  |
| hsa-miR-9983-3p   | NM_001225 | CASP4 | 0.000748005 | 5UTR |
| hsa-miR-10524-5p  | NM_001225 | CASP4 | 4.39E-05    | CDS  |
| hsa-miR-10526-3p  | NM_001225 | CASP4 | 0.006369709 | CDS  |

|                  |           |       |             |      |
|------------------|-----------|-------|-------------|------|
| hsa-miR-11181-3p | NM_001225 | CASP4 | 0.000867817 | CDS  |
| hsa-miR-11399    | NM_001225 | CASP4 | 2.78E-05    | CDS  |
| hsa-miR-11400    | NM_001225 | CASP4 | 0.002728573 | CDS  |
| hsa-miR-11400    | NM_001225 | CASP4 | 0.01017319  | CDS  |
| hsa-miR-11401    | NM_001225 | CASP4 | 0.000515943 | CDS  |
| hsa-miR-11401    | NM_001225 | CASP4 | 6.19E-05    | CDS  |
| hsa-miR-3059-5p  | NM_001225 | CASP4 | 0.01088552  | CDS  |
| hsa-miR-3059-3p  | NM_001225 | CASP4 | 0.002973746 | CDS  |
| hsa-miR-3085-5p  | NM_001225 | CASP4 | 9.55E-05    | CDS  |
| hsa-miR-3085-5p  | NM_001225 | CASP4 | 0.02761587  | CDS  |
| hsa-miR-3085-5p  | NM_001225 | CASP4 | 4.82E-05    | CDS  |
| hsa-miR-3085-3p  | NM_001225 | CASP4 | 2.48E-05    | CDS  |
| hsa-miR-3085-3p  | NM_001225 | CASP4 | 0.01923861  | 3UTR |
| hsa-miR-6529-3p  | NM_001225 | CASP4 | 0.00778497  | CDS  |
| hsa-miR-12113    | NM_001225 | CASP4 | 0.003929355 | CDS  |
| hsa-miR-12114    | NM_001225 | CASP4 | 0.000190781 | CDS  |
| hsa-miR-12114    | NM_001225 | CASP4 | 0.001680409 | CDS  |
| hsa-miR-12117    | NM_001225 | CASP4 | 0.01956369  | CDS  |
| hsa-miR-12118    | NM_001225 | CASP4 | 0.006369709 | 3UTR |
| hsa-miR-12119    | NM_001225 | CASP4 | 0.000431619 | 5UTR |
| hsa-miR-12121    | NM_001225 | CASP4 | 0.00307967  | CDS  |
| hsa-miR-12121    | NM_001225 | CASP4 | 0.003042605 | CDS  |
| hsa-miR-12122    | NM_001225 | CASP4 | 0.000907136 | CDS  |
| hsa-miR-12126    | NM_001225 | CASP4 | 0.000429816 | CDS  |
| hsa-miR-12127    | NM_001225 | CASP4 | 0.001000701 | CDS  |
| hsa-miR-12128    | NM_001225 | CASP4 | 0.00588506  | CDS  |
| hsa-miR-12129    | NM_001225 | CASP4 | 0.000180943 | CDS  |
| hsa-miR-12130    | NM_001225 | CASP4 | 0.000205996 | CDS  |

---

**Table S3.Target miRNA of CASP4 from miRNet.**

| mirnet            | mir_id           | mir_acc     | symbol | entrez | experiment                      |
|-------------------|------------------|-------------|--------|--------|---------------------------------|
| mirnet-hsa-12982  | hsa-mir-26b-5p   | MIMAT000083 | CASP4  | 837    | Microarray                      |
| mirnet-hsa-731556 | hsa-let-7d-5p    | MIMAT000065 | CASP4  | 837    | HITS-CLIP                       |
| mirnet-hsa-731557 | hsa-mir-122-5p   | MIMAT000421 | CASP4  | 837    | Biotin-Microarrays, Microarrays |
| mirnet-hsa-731558 | hsa-mir-143-3p   | MIMAT000435 | CASP4  | 837    | PAR-CLIP                        |
| mirnet-hsa-731559 | hsa-mir-153-3p   | MIMAT000439 | CASP4  | 837    | HITS-CLIP                       |
| mirnet-hsa-731560 | hsa-mir-193a-5p  | MIMAT004614 | CASP4  | 837    | HITS-CLIP                       |
| mirnet-hsa-731561 | hsa-mir-2682-5p  | MIMAT013517 | CASP4  | 837    | HITS-CLIP                       |
| mirnet-hsa-731562 | hsa-mir-30a-5p   | MIMAT000087 | CASP4  | 837    | HITS-CLIP                       |
| mirnet-hsa-731563 | hsa-mir-30b-5p   | MIMAT000420 | CASP4  | 837    | HITS-CLIP                       |
| mirnet-hsa-731564 | hsa-mir-30c-5p   | MIMAT000244 | CASP4  | 837    | HITS-CLIP                       |
| mirnet-hsa-731565 | hsa-mir-30d-5p   | MIMAT000245 | CASP4  | 837    | HITS-CLIP                       |
| mirnet-hsa-731566 | hsa-mir-30e-5p   | MIMAT000692 | CASP4  | 837    | HITS-CLIP                       |
| mirnet-hsa-731567 | hsa-mir-3689a-5p | MIMAT018117 | CASP4  | 837    | PAR-CLIP                        |
| mirnet-hsa-731568 | hsa-mir-3689b-5p | MIMAT018180 | CASP4  | 837    | PAR-CLIP                        |
| mirnet-hsa-731569 | hsa-mir-3689e    | MIMAT019009 | CASP4  | 837    | PAR-CLIP                        |
| mirnet-hsa-731570 | hsa-mir-3689f    | MIMAT019010 | CASP4  | 837    | PAR-CLIP                        |
| mirnet-hsa-731571 | hsa-mir-573      | MIMAT003238 | CASP4  | 837    | HITS-CLIP                       |
| mirnet-hsa-731572 | hsa-mir-629-5p   | MIMAT004810 | CASP4  | 837    | HITS-CLIP                       |
| mirnet-hsa-731573 | hsa-mir-671-5p   | MIMAT003880 | CASP4  | 837    | HITS-CLIP                       |
| mirnet-hsa-731574 | hsa-mir-877-3p   | MIMAT004950 | CASP4  | 837    | HITS-CLIP                       |
| mirnet-hsa-731575 | hsa-mir-1-3p     | MIMAT0      | CASP4  | 837    | RPF-Seq,                        |



|                   |                      |                  |       |     |             |
|-------------------|----------------------|------------------|-------|-----|-------------|
|                   |                      | 000416           |       |     | RNA-Seq     |
| mirnet-hsa-731576 | hsa-mir-103a-3p      | MIMAT0<br>000101 | CASP4 | 837 | RIP-Seq     |
| mirnet-hsa-731577 | hsa-mir-23b-3p       | MIMAT0<br>000418 | CASP4 | 837 | RNA-Seq     |
| mirnet-hsa-731578 | hsa-mir-129-2-3<br>p | MIMAT0<br>004605 | CASP4 | 837 | Microarrays |
| mirnet-hsa-731579 | hsa-mir-210-3p       | MIMAT0<br>000267 | CASP4 | 837 | Microarrays |
| mirnet-hsa-731580 | hsa-mir-452-5p       | MIMAT0<br>001635 | CASP4 | 837 | Microarrays |
| mirnet-hsa-731581 | hsa-mir-374a-5p      | MIMAT0<br>000727 | CASP4 | 837 | Microarrays |
| mirnet-hsa-731582 | hsa-mir-148b-3p      | MIMAT0<br>000759 | CASP4 | 837 | Microarrays |
| mirnet-hsa-731583 | hsa-mir-133a-3p      | MIMAT0<br>000427 | CASP4 | 837 | Microarrays |

---

**Table S4.Target miRNA of NLRC4 from miRWalk.**

| mirnaid           | refseqid     | genesymbol | accessibility | position |
|-------------------|--------------|------------|---------------|----------|
| hsa-let-7b-5p     | NM_001302504 | NLRC4      | 0.002007726   | 5UTR     |
| hsa-let-7d-5p     | NM_001302504 | NLRC4      | 0.005727952   | 5UTR     |
| hsa-let-7d-5p     | NM_001302504 | NLRC4      | 0.006459822   | CDS      |
| hsa-miR-15a-3p    | NM_001302504 | NLRC4      | 3.15E-05      | CDS      |
| hsa-miR-18a-5p    | NM_001302504 | NLRC4      | 0.01680466    | 5UTR     |
| hsa-miR-18a-3p    | NM_001302504 | NLRC4      | 0.000166253   | CDS      |
| hsa-miR-19b-1-5p  | NM_001302504 | NLRC4      | 0.002426029   | CDS      |
| hsa-miR-19b-1-5p  | NM_001302504 | NLRC4      | 0.000586658   | CDS      |
| hsa-miR-20a-3p    | NM_001302504 | NLRC4      | 0.01697337    | CDS      |
| hsa-miR-21-3p     | NM_001302504 | NLRC4      | 0.02183851    | CDS      |
| hsa-miR-22-5p     | NM_001302504 | NLRC4      | 0.01719664    | CDS      |
| hsa-miR-22-5p     | NM_001302504 | NLRC4      | 0.001206662   | CDS      |
| hsa-miR-23a-5p    | NM_001302504 | NLRC4      | 0.004916043   | 5UTR     |
| hsa-miR-23a-5p    | NM_001302504 | NLRC4      | 0.02261598    | CDS      |
| hsa-miR-23a-3p    | NM_001302504 | NLRC4      | 4.02E-07      | CDS      |
| hsa-miR-23a-3p    | NM_001302504 | NLRC4      | 0.006950725   | CDS      |
| hsa-miR-23a-3p    | NM_001302504 | NLRC4      | 4.78E-05      | 5UTR     |
| hsa-miR-24-3p     | NM_001302504 | NLRC4      | 0.01083776    | 5UTR     |
| hsa-miR-25-5p     | NM_001302504 | NLRC4      | 0.002521103   | CDS      |
| hsa-miR-25-5p     | NM_001302504 | NLRC4      | 0.004040886   | 5UTR     |
| hsa-miR-25-3p     | NM_001302504 | NLRC4      | 0.1021509     | CDS      |
| hsa-miR-26a-5p    | NM_001302504 | NLRC4      | 0.02111429    | CDS      |
| hsa-miR-26a-5p    | NM_001302504 | NLRC4      | 0.000526611   | CDS      |
| hsa-miR-27a-5p    | NM_001302504 | NLRC4      | 9.02E-05      | CDS      |
| hsa-miR-27a-5p    | NM_001302504 | NLRC4      | 0.000248086   | CDS      |
| hsa-miR-28-3p     | NM_001302504 | NLRC4      | 0.04728263    | CDS      |
| hsa-miR-30a-3p    | NM_001302504 | NLRC4      | 0.002758134   | 5UTR     |
| hsa-miR-31-3p     | NM_001302504 | NLRC4      | 0.000196593   | CDS      |
| hsa-miR-32-3p     | NM_001302504 | NLRC4      | 0.003941034   | CDS      |
| hsa-miR-92a-2-5p  | NM_001302504 | NLRC4      | 0.01408661    | CDS      |
| hsa-miR-93-5p     | NM_001302504 | NLRC4      | 0.03260867    | CDS      |
| hsa-miR-93-5p     | NM_001302504 | NLRC4      | 0.002536929   | CDS      |
| hsa-miR-93-3p     | NM_001302504 | NLRC4      | 0.000491166   | CDS      |
| hsa-miR-101-5p    | NM_001302504 | NLRC4      | 0.000170659   | CDS      |
| hsa-miR-29b-2-5p  | NM_001302504 | NLRC4      | 0.003230363   | 5UTR     |
| hsa-miR-103a-2-5p | NM_001302504 | NLRC4      | 0.003672413   | CDS      |
| hsa-miR-103a-3p   | NM_001302504 | NLRC4      | 0.001687649   | 5UTR     |
| hsa-miR-103a-1-5p | NM_001302504 | NLRC4      | 0.002434622   | CDS      |
| hsa-miR-105-3p    | NM_001302504 | NLRC4      | 0.01138768    | CDS      |
| hsa-miR-107       | NM_001302504 | NLRC4      | 0.001687649   | 5UTR     |
| hsa-miR-196a-5p   | NM_001302504 | NLRC4      | 0.000651452   | CDS      |

|                   |              |       |             |      |
|-------------------|--------------|-------|-------------|------|
| hsa-miR-197-5p    | NM_001302504 | NLRC4 | 0.000605168 | CDS  |
| hsa-miR-197-3p    | NM_001302504 | NLRC4 | 5.87E-05    | CDS  |
| hsa-miR-198       | NM_001302504 | NLRC4 | 0.02559255  | 5UTR |
| hsa-miR-199a-5p   | NM_001302504 | NLRC4 | 0.000228018 | CDS  |
| hsa-miR-208a-5p   | NM_001302504 | NLRC4 | 0.01362656  | CDS  |
| hsa-miR-208a-5p   | NM_001302504 | NLRC4 | 0.003571021 | CDS  |
| hsa-miR-148a-5p   | NM_001302504 | NLRC4 | 0.001440022 | CDS  |
| hsa-miR-30c-2-3p  | NM_001302504 | NLRC4 | 0.001886311 | 5UTR |
| hsa-miR-30c-2-3p  | NM_001302504 | NLRC4 | 0.000592353 | CDS  |
| hsa-miR-30d-3p    | NM_001302504 | NLRC4 | 0.002758134 | 5UTR |
| hsa-miR-30d-3p    | NM_001302504 | NLRC4 | 0.003803932 | CDS  |
| hsa-miR-139-5p    | NM_001302504 | NLRC4 | 0.00874274  | CDS  |
| hsa-miR-139-3p    | NM_001302504 | NLRC4 | 2.66E-05    | 5UTR |
| hsa-miR-10b-3p    | NM_001302504 | NLRC4 | 0.000163163 | 5UTR |
| hsa-miR-34a-5p    | NM_001302504 | NLRC4 | 0.004854961 | CDS  |
| hsa-miR-34a-5p    | NM_001302504 | NLRC4 | 7.72E-06    | CDS  |
| hsa-miR-181a-5p   | NM_001302504 | NLRC4 | 0.000271192 | CDS  |
| hsa-miR-181a-5p   | NM_001302504 | NLRC4 | 0.006729548 | CDS  |
| hsa-miR-181a-2-3p | NM_001302504 | NLRC4 | 9.15E-06    | 5UTR |
| hsa-miR-181b-5p   | NM_001302504 | NLRC4 | 0.006729548 | CDS  |
| hsa-miR-181b-5p   | NM_001302504 | NLRC4 | 0.000271192 | CDS  |
| hsa-miR-181b-5p   | NM_001302504 | NLRC4 | 0.01472671  | CDS  |
| hsa-miR-181c-5p   | NM_001302504 | NLRC4 | 0.006729548 | CDS  |
| hsa-miR-181c-5p   | NM_001302504 | NLRC4 | 0.000271192 | CDS  |
| hsa-miR-182-5p    | NM_001302504 | NLRC4 | 0.000553642 | 5UTR |
| hsa-miR-187-5p    | NM_001302504 | NLRC4 | 7.51E-05    | CDS  |
| hsa-miR-187-3p    | NM_001302504 | NLRC4 | 0.000757346 | CDS  |
| hsa-miR-199b-5p   | NM_001302504 | NLRC4 | 0.000228018 | CDS  |
| hsa-miR-199b-5p   | NM_001302504 | NLRC4 | 0.004365555 | CDS  |
| hsa-miR-204-3p    | NM_001302504 | NLRC4 | 0.001018132 | 5UTR |
| hsa-miR-205-5p    | NM_001302504 | NLRC4 | 0.0561252   | 5UTR |
| hsa-miR-205-5p    | NM_001302504 | NLRC4 | 1.34E-05    | 5UTR |
| hsa-miR-210-5p    | NM_001302504 | NLRC4 | 2.13E-05    | CDS  |
| hsa-miR-211-5p    | NM_001302504 | NLRC4 | 0.000719145 | CDS  |
| hsa-miR-211-3p    | NM_001302504 | NLRC4 | 6.00E-06    | CDS  |
| hsa-miR-212-5p    | NM_001302504 | NLRC4 | 0.00013388  | CDS  |
| hsa-miR-212-3p    | NM_001302504 | NLRC4 | 0.00110755  | CDS  |
| hsa-miR-212-3p    | NM_001302504 | NLRC4 | 0.002426029 | CDS  |
| hsa-miR-181a-3p   | NM_001302504 | NLRC4 | 9.15E-06    | 5UTR |
| hsa-miR-214-5p    | NM_001302504 | NLRC4 | 0.000487376 | CDS  |
| hsa-miR-214-5p    | NM_001302504 | NLRC4 | 7.91E-05    | CDS  |
| hsa-miR-214-3p    | NM_001302504 | NLRC4 | 6.94E-05    | CDS  |
| hsa-miR-214-3p    | NM_001302504 | NLRC4 | 0.002536929 | CDS  |
| hsa-miR-215-3p    | NM_001302504 | NLRC4 | 0.000115841 | CDS  |

|                   |              |       |             |      |
|-------------------|--------------|-------|-------------|------|
| hsa-miR-216a-3p   | NM_001302504 | NLRC4 | 0.002587252 | 5UTR |
| hsa-miR-217-5p    | NM_001302504 | NLRC4 | 9.39E-05    | CDS  |
| hsa-miR-218-1-3p  | NM_001302504 | NLRC4 | 0.008510362 | CDS  |
| hsa-miR-219a-1-3p | NM_001302504 | NLRC4 | 0.000207258 | CDS  |
| hsa-miR-223-3p    | NM_001302504 | NLRC4 | 0.02274983  | CDS  |
| hsa-miR-224-5p    | NM_001302504 | NLRC4 | 0.000604901 | 5UTR |
| hsa-miR-224-5p    | NM_001302504 | NLRC4 | 0.006498872 | CDS  |
| hsa-miR-200b-5p   | NM_001302504 | NLRC4 | 2.82E-07    | CDS  |
| hsa-let-7g-3p     | NM_001302504 | NLRC4 | 6.75E-07    | CDS  |
| hsa-miR-15b-5p    | NM_001302504 | NLRC4 | 7.72E-06    | CDS  |
| hsa-miR-15b-5p    | NM_001302504 | NLRC4 | 0.000730261 | 5UTR |
| hsa-miR-15b-3p    | NM_001302504 | NLRC4 | 0.05384545  | CDS  |
| hsa-miR-23b-5p    | NM_001302504 | NLRC4 | 0.01919602  | CDS  |
| hsa-miR-23b-3p    | NM_001302504 | NLRC4 | 0.0318968   | 5UTR |
| hsa-miR-23b-3p    | NM_001302504 | NLRC4 | 4.02E-07    | CDS  |
| hsa-miR-27b-5p    | NM_001302504 | NLRC4 | 0.000248086 | CDS  |
| hsa-miR-27b-3p    | NM_001302504 | NLRC4 | 0.01101506  | CDS  |
| hsa-miR-30b-3p    | NM_001302504 | NLRC4 | 0.000441884 | CDS  |
| hsa-miR-30b-3p    | NM_001302504 | NLRC4 | 0.000601154 | CDS  |
| hsa-miR-124-3p    | NM_001302504 | NLRC4 | 0.01680466  | 5UTR |
| hsa-miR-125b-1-3p | NM_001302504 | NLRC4 | 5.44E-05    | 5UTR |
| hsa-miR-128-1-5p  | NM_001302504 | NLRC4 | 3.28E-05    | 5UTR |
| hsa-miR-133a-3p   | NM_001302504 | NLRC4 | 0.000174148 | 5UTR |
| hsa-miR-135a-5p   | NM_001302504 | NLRC4 | 0.07413136  | 5UTR |
| hsa-miR-137-3p    | NM_001302504 | NLRC4 | 0.01085972  | CDS  |
| hsa-miR-138-5p    | NM_001302504 | NLRC4 | 0.000271192 | CDS  |
| hsa-miR-138-5p    | NM_001302504 | NLRC4 | 0.004879862 | CDS  |
| hsa-miR-138-5p    | NM_001302504 | NLRC4 | 0.01392031  | CDS  |
| hsa-miR-140-3p    | NM_001302504 | NLRC4 | 0.01337743  | 5UTR |
| hsa-miR-141-5p    | NM_001302504 | NLRC4 | 0.002758134 | 5UTR |
| hsa-miR-142-3p    | NM_001302504 | NLRC4 | 0.000596955 | 5UTR |
| hsa-miR-145-5p    | NM_001302504 | NLRC4 | 2.42E-06    | CDS  |
| hsa-miR-145-5p    | NM_001302504 | NLRC4 | 0.000477204 | CDS  |
| hsa-miR-153-3p    | NM_001302504 | NLRC4 | 6.16E-05    | CDS  |
| hsa-miR-191-5p    | NM_001302504 | NLRC4 | 0.004907097 | CDS  |
| hsa-miR-191-3p    | NM_001302504 | NLRC4 | 7.49E-05    | CDS  |
| hsa-miR-9-5p      | NM_001302504 | NLRC4 | 0.002763122 | CDS  |
| hsa-miR-125a-3p   | NM_001302504 | NLRC4 | 0.0353236   | CDS  |
| hsa-miR-125b-2-3p | NM_001302504 | NLRC4 | 0.005072645 | CDS  |
| hsa-miR-125b-2-3p | NM_001302504 | NLRC4 | 0.000137166 | CDS  |
| hsa-miR-127-5p    | NM_001302504 | NLRC4 | 0.000111626 | 5UTR |
| hsa-miR-127-5p    | NM_001302504 | NLRC4 | 0.000601154 | CDS  |
| hsa-miR-127-3p    | NM_001302504 | NLRC4 | 0.000905808 | CDS  |
| hsa-miR-127-3p    | NM_001302504 | NLRC4 | 0.001002627 | CDS  |

|                  |              |       |             |      |
|------------------|--------------|-------|-------------|------|
| hsa-miR-134-5p   | NM_001302504 | NLRC4 | 0.02898688  | CDS  |
| hsa-miR-134-3p   | NM_001302504 | NLRC4 | 0.000388466 | CDS  |
| hsa-miR-134-3p   | NM_001302504 | NLRC4 | 0.000118833 | CDS  |
| hsa-miR-136-3p   | NM_001302504 | NLRC4 | 0.02239456  | CDS  |
| hsa-miR-149-5p   | NM_001302504 | NLRC4 | 0.000260618 | CDS  |
| hsa-miR-149-5p   | NM_001302504 | NLRC4 | 0.1692367   | 5UTR |
| hsa-miR-149-3p   | NM_001302504 | NLRC4 | 0.000262096 | 5UTR |
| hsa-miR-150-5p   | NM_001302504 | NLRC4 | 0.05096433  | 5UTR |
| hsa-miR-150-3p   | NM_001302504 | NLRC4 | 4.96E-05    | CDS  |
| hsa-miR-150-3p   | NM_001302504 | NLRC4 | 0.01135416  | 5UTR |
| hsa-miR-150-3p   | NM_001302504 | NLRC4 | 0.004462303 | CDS  |
| hsa-miR-154-5p   | NM_001302504 | NLRC4 | 0.000707503 | CDS  |
| hsa-miR-154-5p   | NM_001302504 | NLRC4 | 0.01861651  | CDS  |
| hsa-miR-184      | NM_001302504 | NLRC4 | 0.002521103 | CDS  |
| hsa-miR-185-3p   | NM_001302504 | NLRC4 | 0.002744589 | CDS  |
| hsa-miR-188-5p   | NM_001302504 | NLRC4 | 0.002274012 | CDS  |
| hsa-miR-188-3p   | NM_001302504 | NLRC4 | 4.78E-05    | 5UTR |
| hsa-miR-193a-5p  | NM_001302504 | NLRC4 | 0.003503197 | CDS  |
| hsa-miR-193a-5p  | NM_001302504 | NLRC4 | 0.02256466  | 5UTR |
| hsa-miR-193a-5p  | NM_001302504 | NLRC4 | 0.000104007 | CDS  |
| hsa-miR-195-3p   | NM_001302504 | NLRC4 | 0.002536929 | CDS  |
| hsa-miR-195-3p   | NM_001302504 | NLRC4 | 0.02013325  | 5UTR |
| hsa-miR-320a-5p  | NM_001302504 | NLRC4 | 0.006486821 | CDS  |
| hsa-miR-320a-3p  | NM_001302504 | NLRC4 | 0.001567866 | CDS  |
| hsa-miR-320a-3p  | NM_001302504 | NLRC4 | 0.01442079  | 5UTR |
| hsa-miR-200c-5p  | NM_001302504 | NLRC4 | 0.06641009  | CDS  |
| hsa-miR-1-5p     | NM_001302504 | NLRC4 | 0.01318848  | CDS  |
| hsa-miR-194-3p   | NM_001302504 | NLRC4 | 0.000357171 | CDS  |
| hsa-miR-30c-1-3p | NM_001302504 | NLRC4 | 0.003230363 | 5UTR |
| hsa-miR-30c-1-3p | NM_001302504 | NLRC4 | 0.000601154 | CDS  |
| hsa-miR-30c-1-3p | NM_001302504 | NLRC4 | 0.001280351 | CDS  |
| hsa-miR-30c-1-3p | NM_001302504 | NLRC4 | 0.02599771  | CDS  |
| hsa-miR-34b-3p   | NM_001302504 | NLRC4 | 0.000319363 | 5UTR |
| hsa-miR-34c-3p   | NM_001302504 | NLRC4 | 0.008423108 | CDS  |
| hsa-miR-99b-3p   | NM_001302504 | NLRC4 | 0.0532159   | CDS  |
| hsa-miR-99b-3p   | NM_001302504 | NLRC4 | 0.000230589 | CDS  |
| hsa-miR-296-3p   | NM_001302504 | NLRC4 | 0.000262096 | 5UTR |
| hsa-miR-296-3p   | NM_001302504 | NLRC4 | 0.005154978 | 5UTR |
| hsa-miR-296-3p   | NM_001302504 | NLRC4 | 0.06182194  | CDS  |
| hsa-miR-296-3p   | NM_001302504 | NLRC4 | 0.000427409 | CDS  |
| hsa-miR-130b-5p  | NM_001302504 | NLRC4 | 0.07413136  | 5UTR |
| hsa-miR-130b-5p  | NM_001302504 | NLRC4 | 0.0160053   | CDS  |
| hsa-miR-30e-3p   | NM_001302504 | NLRC4 | 0.008037838 | 5UTR |
| hsa-miR-361-5p   | NM_001302504 | NLRC4 | 0.000915739 | 5UTR |

|                 |              |       |             |      |
|-----------------|--------------|-------|-------------|------|
| hsa-miR-361-3p  | NM_001302504 | NLRC4 | 0.004618597 | 5UTR |
| hsa-miR-362-5p  | NM_001302504 | NLRC4 | 9.79E-05    | 5UTR |
| hsa-miR-363-5p  | NM_001302504 | NLRC4 | 0.000129336 | CDS  |
| hsa-miR-365a-5p | NM_001302504 | NLRC4 | 0.003328804 | 5UTR |
| hsa-miR-365b-5p | NM_001302504 | NLRC4 | 0.00303577  | CDS  |
| hsa-miR-365b-5p | NM_001302504 | NLRC4 | 0.003328804 | 5UTR |
| hsa-miR-302c-5p | NM_001302504 | NLRC4 | 0.000121323 | 5UTR |
| hsa-miR-302d-5p | NM_001302504 | NLRC4 | 0.01940061  | CDS  |
| hsa-miR-376c-5p | NM_001302504 | NLRC4 | 0.01718499  | CDS  |
| hsa-miR-370-5p  | NM_001302504 | NLRC4 | 3.15E-05    | CDS  |
| hsa-miR-370-3p  | NM_001302504 | NLRC4 | 0.000285464 | 5UTR |
| hsa-miR-371a-5p | NM_001302504 | NLRC4 | 8.76E-06    | 5UTR |
| hsa-miR-371a-5p | NM_001302504 | NLRC4 | 0.02111429  | CDS  |
| hsa-miR-373-5p  | NM_001302504 | NLRC4 | 8.76E-06    | 5UTR |
| hsa-miR-375-3p  | NM_001302504 | NLRC4 | 0.001137387 | CDS  |
| hsa-miR-378a-5p | NM_001302504 | NLRC4 | 0.000244245 | CDS  |
| hsa-miR-381-5p  | NM_001302504 | NLRC4 | 4.02E-06    | CDS  |
| hsa-miR-381-3p  | NM_001302504 | NLRC4 | 0.000507522 | CDS  |
| hsa-miR-381-3p  | NM_001302504 | NLRC4 | 0.03650309  | 5UTR |
| hsa-miR-330-5p  | NM_001302504 | NLRC4 | 0.02569602  | 5UTR |
| hsa-miR-330-5p  | NM_001302504 | NLRC4 | 0.004956985 | 5UTR |
| hsa-miR-328-5p  | NM_001302504 | NLRC4 | 0.004916043 | 5UTR |
| hsa-miR-328-5p  | NM_001302504 | NLRC4 | 0.004462303 | CDS  |
| hsa-miR-328-5p  | NM_001302504 | NLRC4 | 5.44E-05    | 5UTR |
| hsa-miR-328-3p  | NM_001302504 | NLRC4 | 1.35E-05    | CDS  |
| hsa-miR-342-5p  | NM_001302504 | NLRC4 | 4.18E-05    | CDS  |
| hsa-miR-342-5p  | NM_001302504 | NLRC4 | 0.02268423  | CDS  |
| hsa-miR-323a-5p | NM_001302504 | NLRC4 | 0.00013022  | CDS  |
| hsa-miR-323a-5p | NM_001302504 | NLRC4 | 0.000384649 | CDS  |
| hsa-miR-323a-5p | NM_001302504 | NLRC4 | 0.01064677  | CDS  |
| hsa-miR-326     | NM_001302504 | NLRC4 | 0.000595816 | CDS  |
| hsa-miR-326     | NM_001302504 | NLRC4 | 0.000592353 | CDS  |
| hsa-miR-326     | NM_001302504 | NLRC4 | 0.000215389 | CDS  |
| hsa-miR-151a-3p | NM_001302504 | NLRC4 | 0.000601154 | CDS  |
| hsa-miR-135b-5p | NM_001302504 | NLRC4 | 0.07413136  | 5UTR |
| hsa-miR-135b-3p | NM_001302504 | NLRC4 | 9.29E-05    | CDS  |
| hsa-miR-331-5p  | NM_001302504 | NLRC4 | 6.99E-05    | CDS  |
| hsa-miR-331-3p  | NM_001302504 | NLRC4 | 0.02225154  | 5UTR |
| hsa-miR-324-5p  | NM_001302504 | NLRC4 | 2.82E-07    | CDS  |
| hsa-miR-324-3p  | NM_001302504 | NLRC4 | 2.82E-07    | CDS  |
| hsa-miR-338-3p  | NM_001302504 | NLRC4 | 0.000174573 | CDS  |
| hsa-miR-339-3p  | NM_001302504 | NLRC4 | 0.000516525 | CDS  |
| hsa-miR-335-3p  | NM_001302504 | NLRC4 | 0.004577843 | CDS  |
| hsa-miR-133b    | NM_001302504 | NLRC4 | 0.000174148 | 5UTR |

|                 |              |       |             |      |
|-----------------|--------------|-------|-------------|------|
| hsa-miR-325     | NM_001302504 | NLRC4 | 0.005039915 | 5UTR |
| hsa-miR-345-3p  | NM_001302504 | NLRC4 | 7.09E-05    | 5UTR |
| hsa-miR-345-3p  | NM_001302504 | NLRC4 | 0.000167343 | CDS  |
| hsa-miR-345-3p  | NM_001302504 | NLRC4 | 0.001763547 | CDS  |
| hsa-miR-346     | NM_001302504 | NLRC4 | 0.000196593 | CDS  |
| hsa-miR-346     | NM_001302504 | NLRC4 | 0.003923357 | CDS  |
| hsa-miR-346     | NM_001302504 | NLRC4 | 7.51E-05    | CDS  |
| hsa-miR-196b-5p | NM_001302504 | NLRC4 | 0.000651452 | CDS  |
| hsa-miR-196b-3p | NM_001302504 | NLRC4 | 0.003455527 | CDS  |
| hsa-miR-196b-3p | NM_001302504 | NLRC4 | 0.000262096 | 5UTR |
| hsa-miR-422a    | NM_001302504 | NLRC4 | 0.003230363 | 5UTR |
| hsa-miR-423-5p  | NM_001302504 | NLRC4 | 0.001564227 | CDS  |
| hsa-miR-423-5p  | NM_001302504 | NLRC4 | 0.02261598  | CDS  |
| hsa-miR-424-5p  | NM_001302504 | NLRC4 | 7.45E-06    | CDS  |
| hsa-miR-425-5p  | NM_001302504 | NLRC4 | 0.003446949 | CDS  |
| hsa-miR-18b-3p  | NM_001302504 | NLRC4 | 0.000166253 | CDS  |
| hsa-miR-431-5p  | NM_001302504 | NLRC4 | 0.000757346 | CDS  |
| hsa-miR-431-3p  | NM_001302504 | NLRC4 | 6.99E-05    | CDS  |
| hsa-miR-433-5p  | NM_001302504 | NLRC4 | 0.001125861 | CDS  |
| hsa-miR-451a    | NM_001302504 | NLRC4 | 0.001137387 | CDS  |
| hsa-miR-409-5p  | NM_001302504 | NLRC4 | 0.000250206 | CDS  |
| hsa-miR-409-5p  | NM_001302504 | NLRC4 | 0.000167343 | CDS  |
| hsa-miR-412-3p  | NM_001302504 | NLRC4 | 0.000285506 | 5UTR |
| hsa-miR-410-5p  | NM_001302504 | NLRC4 | 0.02268423  | CDS  |
| hsa-miR-376b-5p | NM_001302504 | NLRC4 | 0.01718499  | CDS  |
| hsa-miR-483-3p  | NM_001302504 | NLRC4 | 0.01024658  | CDS  |
| hsa-miR-485-5p  | NM_001302504 | NLRC4 | 4.18E-05    | CDS  |
| hsa-miR-485-3p  | NM_001302504 | NLRC4 | 0.02545618  | 5UTR |
| hsa-miR-486-5p  | NM_001302504 | NLRC4 | 0.02225154  | 5UTR |
| hsa-miR-486-3p  | NM_001302504 | NLRC4 | 6.00E-06    | CDS  |
| hsa-miR-487a-5p | NM_001302504 | NLRC4 | 0.000252851 | CDS  |
| hsa-miR-487a-3p | NM_001302504 | NLRC4 | 0.0318968   | 5UTR |
| hsa-miR-490-3p  | NM_001302504 | NLRC4 | 6.23E-05    | 5UTR |
| hsa-miR-491-5p  | NM_001302504 | NLRC4 | 3.28E-05    | 5UTR |
| hsa-miR-491-5p  | NM_001302504 | NLRC4 | 0.000357171 | CDS  |
| hsa-miR-511-5p  | NM_001302504 | NLRC4 | 2.28E-05    | CDS  |
| hsa-miR-146b-3p | NM_001302504 | NLRC4 | 0.009341621 | CDS  |
| hsa-miR-202-3p  | NM_001302504 | NLRC4 | 0.001931775 | CDS  |
| hsa-miR-202-3p  | NM_001302504 | NLRC4 | 0.0195374   | 5UTR |
| hsa-miR-493-5p  | NM_001302504 | NLRC4 | 0.07045485  | CDS  |
| hsa-miR-432-5p  | NM_001302504 | NLRC4 | 0.000468248 | 5UTR |
| hsa-miR-432-5p  | NM_001302504 | NLRC4 | 0.003230363 | 5UTR |
| hsa-miR-432-5p  | NM_001302504 | NLRC4 | 0.01171861  | CDS  |
| hsa-miR-494-5p  | NM_001302504 | NLRC4 | 0.003719112 | 5UTR |

|                   |              |       |             |      |
|-------------------|--------------|-------|-------------|------|
| hsa-miR-494-5p    | NM_001302504 | NLRC4 | 0.000294775 | CDS  |
| hsa-miR-495-5p    | NM_001302504 | NLRC4 | 0.000250206 | CDS  |
| hsa-miR-193b-5p   | NM_001302504 | NLRC4 | 0.005846554 | 5UTR |
| hsa-miR-193b-5p   | NM_001302504 | NLRC4 | 0.03188717  | CDS  |
| hsa-miR-497-5p    | NM_001302504 | NLRC4 | 7.45E-06    | CDS  |
| hsa-miR-181d-5p   | NM_001302504 | NLRC4 | 0.006729548 | CDS  |
| hsa-miR-181d-5p   | NM_001302504 | NLRC4 | 0.000271192 | CDS  |
| hsa-miR-181d-3p   | NM_001302504 | NLRC4 | 7.09E-05    | 5UTR |
| hsa-miR-512-5p    | NM_001302504 | NLRC4 | 1.02E-05    | 5UTR |
| hsa-miR-512-5p    | NM_001302504 | NLRC4 | 2.82E-07    | CDS  |
| hsa-miR-512-3p    | NM_001302504 | NLRC4 | 8.91E-06    | CDS  |
| hsa-miR-512-3p    | NM_001302504 | NLRC4 | 0.000516525 | CDS  |
| hsa-miR-498-5p    | NM_001302504 | NLRC4 | 2.31E-05    | 5UTR |
| hsa-miR-515-3p    | NM_001302504 | NLRC4 | 0.004907097 | CDS  |
| hsa-miR-519e-5p   | NM_001302504 | NLRC4 | 2.10E-05    | 5UTR |
| hsa-miR-520a-5p   | NM_001302504 | NLRC4 | 6.23E-05    | 5UTR |
| hsa-miR-519b-3p   | NM_001302504 | NLRC4 | 0.01064677  | CDS  |
| hsa-miR-525-5p    | NM_001302504 | NLRC4 | 0.001637361 | CDS  |
| hsa-miR-523-3p    | NM_001302504 | NLRC4 | 0.000522965 | CDS  |
| hsa-miR-518c-5p   | NM_001302504 | NLRC4 | 0.002919858 | 5UTR |
| hsa-miR-518c-5p   | NM_001302504 | NLRC4 | 0.000118833 | CDS  |
| hsa-miR-524-3p    | NM_001302504 | NLRC4 | 2.91E-05    | 5UTR |
| hsa-miR-519d-5p   | NM_001302504 | NLRC4 | 0.01018554  | CDS  |
| hsa-miR-518a-5p   | NM_001302504 | NLRC4 | 5.03E-05    | 5UTR |
| hsa-miR-522-3p    | NM_001302504 | NLRC4 | 0.01064677  | CDS  |
| hsa-miR-527       | NM_001302504 | NLRC4 | 5.03E-05    | 5UTR |
| hsa-miR-499a-3p   | NM_001302504 | NLRC4 | 0.000108131 | CDS  |
| hsa-miR-500a-5p   | NM_001302504 | NLRC4 | 0.02569602  | 5UTR |
| hsa-miR-500a-3p   | NM_001302504 | NLRC4 | 0.000507522 | CDS  |
| hsa-miR-500a-3p   | NM_001302504 | NLRC4 | 0.006363825 | 5UTR |
| hsa-miR-501-3p    | NM_001302504 | NLRC4 | 0.002837809 | CDS  |
| hsa-miR-502-3p    | NM_001302504 | NLRC4 | 0.002837809 | CDS  |
| hsa-miR-502-3p    | NM_001302504 | NLRC4 | 0.006363825 | 5UTR |
| hsa-miR-450a-2-3p | NM_001302504 | NLRC4 | 3.28E-05    | 5UTR |
| hsa-miR-503-5p    | NM_001302504 | NLRC4 | 7.72E-06    | CDS  |
| hsa-miR-503-3p    | NM_001302504 | NLRC4 | 0.01287167  | CDS  |
| hsa-miR-504-5p    | NM_001302504 | NLRC4 | 0.000466531 | 5UTR |
| hsa-miR-504-3p    | NM_001302504 | NLRC4 | 0.004916043 | 5UTR |
| hsa-miR-504-3p    | NM_001302504 | NLRC4 | 1.14E-07    | CDS  |
| hsa-miR-504-3p    | NM_001302504 | NLRC4 | 0.002677635 | CDS  |
| hsa-miR-505-3p    | NM_001302504 | NLRC4 | 0.000601899 | CDS  |
| hsa-miR-513a-3p   | NM_001302504 | NLRC4 | 0.001300536 | 5UTR |
| hsa-miR-506-3p    | NM_001302504 | NLRC4 | 2.21E-05    | 5UTR |
| hsa-miR-507       | NM_001302504 | NLRC4 | 1.91E-05    | 5UTR |



|                 |              |       |             |      |
|-----------------|--------------|-------|-------------|------|
| hsa-miR-508-3p  | NM_001302504 | NLRC4 | 0.000603841 | 5UTR |
| hsa-miR-509-5p  | NM_001302504 | NLRC4 | 0.000502803 | CDS  |
| hsa-miR-509-3p  | NM_001302504 | NLRC4 | 0.1193369   | CDS  |
| hsa-miR-532-5p  | NM_001302504 | NLRC4 | 0.000915739 | 5UTR |
| hsa-miR-532-3p  | NM_001302504 | NLRC4 | 0.02111429  | CDS  |
| hsa-miR-532-3p  | NM_001302504 | NLRC4 | 0.000108131 | CDS  |
| hsa-miR-455-3p  | NM_001302504 | NLRC4 | 1.14E-07    | CDS  |
| hsa-miR-455-3p  | NM_001302504 | NLRC4 | 0.006363825 | 5UTR |
| hsa-miR-487b-5p | NM_001302504 | NLRC4 | 0.01718499  | CDS  |
| hsa-miR-487b-5p | NM_001302504 | NLRC4 | 0.003401124 | 5UTR |
| hsa-miR-487b-3p | NM_001302504 | NLRC4 | 0.008906653 | CDS  |
| hsa-miR-551a    | NM_001302504 | NLRC4 | 0.000167343 | CDS  |
| hsa-miR-552-3p  | NM_001302504 | NLRC4 | 0.005421949 | CDS  |
| hsa-miR-554     | NM_001302504 | NLRC4 | 6.41E-06    | CDS  |
| hsa-miR-92b-3p  | NM_001302504 | NLRC4 | 6.16E-05    | CDS  |
| hsa-miR-92b-3p  | NM_001302504 | NLRC4 | 0.01481681  | CDS  |
| hsa-miR-555     | NM_001302504 | NLRC4 | 0.001764953 | 5UTR |
| hsa-miR-557     | NM_001302504 | NLRC4 | 0.00059879  | CDS  |
| hsa-miR-557     | NM_001302504 | NLRC4 | 5.03E-05    | 5UTR |
| hsa-miR-564     | NM_001302504 | NLRC4 | 2.82E-07    | CDS  |
| hsa-miR-567     | NM_001302504 | NLRC4 | 0.00332693  | CDS  |
| hsa-miR-551b-5p | NM_001302504 | NLRC4 | 5.82E-05    | CDS  |
| hsa-miR-551b-5p | NM_001302504 | NLRC4 | 0.000839272 | CDS  |
| hsa-miR-551b-3p | NM_001302504 | NLRC4 | 0.000167343 | CDS  |
| hsa-miR-569     | NM_001302504 | NLRC4 | 0.000111626 | 5UTR |
| hsa-miR-571     | NM_001302504 | NLRC4 | 0.003910457 | CDS  |
| hsa-miR-572     | NM_001302504 | NLRC4 | 1.05E-05    | 5UTR |
| hsa-miR-574-5p  | NM_001302504 | NLRC4 | 0.05185139  | CDS  |
| hsa-miR-575     | NM_001302504 | NLRC4 | 0.001404358 | 5UTR |
| hsa-miR-579-5p  | NM_001302504 | NLRC4 | 0.000515859 | CDS  |
| hsa-miR-579-5p  | NM_001302504 | NLRC4 | 0.004097495 | CDS  |
| hsa-miR-581     | NM_001302504 | NLRC4 | 0.01012803  | 5UTR |
| hsa-miR-583     | NM_001302504 | NLRC4 | 0.000424871 | CDS  |
| hsa-miR-584-3p  | NM_001302504 | NLRC4 | 0.00110755  | CDS  |
| hsa-miR-585-5p  | NM_001302504 | NLRC4 | 0.005241017 | CDS  |
| hsa-miR-585-5p  | NM_001302504 | NLRC4 | 0.000853702 | 5UTR |
| hsa-miR-587     | NM_001302504 | NLRC4 | 2.10E-05    | 5UTR |
| hsa-miR-593-5p  | NM_001302504 | NLRC4 | 4.05E-05    | CDS  |
| hsa-miR-593-3p  | NM_001302504 | NLRC4 | 0.123846    | CDS  |
| hsa-miR-593-3p  | NM_001302504 | NLRC4 | 0.08763861  | CDS  |
| hsa-miR-596     | NM_001302504 | NLRC4 | 7.24E-05    | CDS  |
| hsa-miR-597-5p  | NM_001302504 | NLRC4 | 7.09E-05    | 5UTR |
| hsa-miR-597-5p  | NM_001302504 | NLRC4 | 0.000162758 | CDS  |
| hsa-miR-597-5p  | NM_001302504 | NLRC4 | 0.000196593 | CDS  |

|                 |              |       |             |      |
|-----------------|--------------|-------|-------------|------|
| hsa-miR-597-3p  | NM_001302504 | NLRC4 | 0.0246692   | CDS  |
| hsa-miR-598-5p  | NM_001302504 | NLRC4 | 0.003401124 | 5UTR |
| hsa-miR-598-5p  | NM_001302504 | NLRC4 | 5.44E-05    | 5UTR |
| hsa-miR-598-3p  | NM_001302504 | NLRC4 | 0.005140746 | CDS  |
| hsa-miR-600     | NM_001302504 | NLRC4 | 0.000952318 | CDS  |
| hsa-miR-602     | NM_001302504 | NLRC4 | 6.71E-05    | 5UTR |
| hsa-miR-604     | NM_001302504 | NLRC4 | 0.000294775 | CDS  |
| hsa-miR-605-5p  | NM_001302504 | NLRC4 | 0.000126832 | CDS  |
| hsa-miR-605-5p  | NM_001302504 | NLRC4 | 0.02569602  | 5UTR |
| hsa-miR-608     | NM_001302504 | NLRC4 | 2.91E-05    | 5UTR |
| hsa-miR-608     | NM_001302504 | NLRC4 | 7.24E-05    | CDS  |
| hsa-miR-610     | NM_001302504 | NLRC4 | 0.003134616 | CDS  |
| hsa-miR-611     | NM_001302504 | NLRC4 | 5.44E-05    | 5UTR |
| hsa-miR-612     | NM_001302504 | NLRC4 | 0.00061316  | CDS  |
| hsa-miR-614     | NM_001302504 | NLRC4 | 0.000522965 | CDS  |
| hsa-miR-615-5p  | NM_001302504 | NLRC4 | 0.00303577  | CDS  |
| hsa-miR-615-5p  | NM_001302504 | NLRC4 | 2.97E-05    | 5UTR |
| hsa-miR-615-5p  | NM_001302504 | NLRC4 | 0.002222065 | CDS  |
| hsa-miR-615-3p  | NM_001302504 | NLRC4 | 1.64E-05    | 5UTR |
| hsa-miR-616-3p  | NM_001302504 | NLRC4 | 0.002052023 | CDS  |
| hsa-miR-617     | NM_001302504 | NLRC4 | 0.000302528 | 5UTR |
| hsa-miR-619-5p  | NM_001302504 | NLRC4 | 0.000107468 | CDS  |
| hsa-miR-619-5p  | NM_001302504 | NLRC4 | 0.007500403 | CDS  |
| hsa-miR-621     | NM_001302504 | NLRC4 | 0.000105297 | CDS  |
| hsa-miR-622     | NM_001302504 | NLRC4 | 0.001033441 | CDS  |
| hsa-miR-623     | NM_001302504 | NLRC4 | 0.001206662 | CDS  |
| hsa-miR-624-5p  | NM_001302504 | NLRC4 | 0.01135416  | 5UTR |
| hsa-miR-625-5p  | NM_001302504 | NLRC4 | 0.000424871 | CDS  |
| hsa-miR-627-5p  | NM_001302504 | NLRC4 | 0.003661642 | CDS  |
| hsa-miR-629-5p  | NM_001302504 | NLRC4 | 0.01919602  | CDS  |
| hsa-miR-629-3p  | NM_001302504 | NLRC4 | 0.000167343 | CDS  |
| hsa-miR-630     | NM_001302504 | NLRC4 | 2.13E-05    | CDS  |
| hsa-miR-33b-3p  | NM_001302504 | NLRC4 | 6.99E-05    | CDS  |
| hsa-miR-33b-3p  | NM_001302504 | NLRC4 | 0.001206662 | CDS  |
| hsa-miR-636     | NM_001302504 | NLRC4 | 0.001102117 | CDS  |
| hsa-miR-637     | NM_001302504 | NLRC4 | 1.35E-05    | CDS  |
| hsa-miR-638     | NM_001302504 | NLRC4 | 0.00303577  | CDS  |
| hsa-miR-638     | NM_001302504 | NLRC4 | 2.91E-05    | 5UTR |
| hsa-miR-639     | NM_001302504 | NLRC4 | 0.00011008  | CDS  |
| hsa-miR-639     | NM_001302504 | NLRC4 | 0.008423108 | CDS  |
| hsa-miR-641     | NM_001302504 | NLRC4 | 0.03853794  | 5UTR |
| hsa-miR-642a-5p | NM_001302504 | NLRC4 | 0.000148632 | CDS  |
| hsa-miR-642a-3p | NM_001302504 | NLRC4 | 2.21E-05    | 5UTR |
| hsa-miR-648     | NM_001302504 | NLRC4 | 0.006459822 | CDS  |

|                 |              |       |             |      |
|-----------------|--------------|-------|-------------|------|
| hsa-miR-650     | NM_001302504 | NLRC4 | 0.000262096 | 5UTR |
| hsa-miR-652-5p  | NM_001302504 | NLRC4 | 0.00013388  | CDS  |
| hsa-miR-662     | NM_001302504 | NLRC4 | 0.000778346 | CDS  |
| hsa-miR-662     | NM_001302504 | NLRC4 | 9.05E-06    | CDS  |
| hsa-miR-662     | NM_001302504 | NLRC4 | 0.02569602  | 5UTR |
| hsa-miR-663a    | NM_001302504 | NLRC4 | 5.44E-05    | 5UTR |
| hsa-miR-663a    | NM_001302504 | NLRC4 | 0.008691157 | 5UTR |
| hsa-miR-449b-3p | NM_001302504 | NLRC4 | 0.000174645 | CDS  |
| hsa-miR-656-5p  | NM_001302504 | NLRC4 | 7.24E-05    | CDS  |
| hsa-miR-657     | NM_001302504 | NLRC4 | 7.45E-06    | CDS  |
| hsa-miR-657     | NM_001302504 | NLRC4 | 0.002521103 | CDS  |
| hsa-miR-658     | NM_001302504 | NLRC4 | 5.60E-05    | CDS  |
| hsa-miR-659-3p  | NM_001302504 | NLRC4 | 0.005382567 | 5UTR |
| hsa-miR-659-3p  | NM_001302504 | NLRC4 | 0.000980386 | 5UTR |
| hsa-miR-542-5p  | NM_001302504 | NLRC4 | 0.000749413 | CDS  |
| hsa-miR-758-3p  | NM_001302504 | NLRC4 | 0.000319363 | 5UTR |
| hsa-miR-1264    | NM_001302504 | NLRC4 | 0.009681347 | CDS  |
| hsa-miR-671-5p  | NM_001302504 | NLRC4 | 1.04E-07    | CDS  |
| hsa-miR-671-3p  | NM_001302504 | NLRC4 | 4.02E-07    | CDS  |
| hsa-miR-668-5p  | NM_001302504 | NLRC4 | 1.14E-07    | CDS  |
| hsa-miR-668-5p  | NM_001302504 | NLRC4 | 0.000234806 | CDS  |
| hsa-miR-668-3p  | NM_001302504 | NLRC4 | 0.000196593 | CDS  |
| hsa-miR-668-3p  | NM_001302504 | NLRC4 | 0.002716126 | CDS  |
| hsa-miR-767-5p  | NM_001302504 | NLRC4 | 0.04309693  | CDS  |
| hsa-miR-767-3p  | NM_001302504 | NLRC4 | 3.81E-05    | CDS  |
| hsa-miR-767-3p  | NM_001302504 | NLRC4 | 0.003923357 | CDS  |
| hsa-miR-1224-5p | NM_001302504 | NLRC4 | 0.002007726 | 5UTR |
| hsa-miR-1224-3p | NM_001302504 | NLRC4 | 0.000126832 | CDS  |
| hsa-miR-320b    | NM_001302504 | NLRC4 | 0.01442079  | 5UTR |
| hsa-miR-320b    | NM_001302504 | NLRC4 | 0.001567866 | CDS  |
| hsa-miR-320c    | NM_001302504 | NLRC4 | 0.001567866 | CDS  |
| hsa-miR-1296-5p | NM_001302504 | NLRC4 | 1.35E-05    | CDS  |
| hsa-miR-1296-5p | NM_001302504 | NLRC4 | 0.008674456 | 5UTR |
| hsa-miR-1296-3p | NM_001302504 | NLRC4 | 0.000357171 | CDS  |
| hsa-miR-1296-3p | NM_001302504 | NLRC4 | 0.001387149 | CDS  |
| hsa-miR-1468-5p | NM_001302504 | NLRC4 | 0.000719145 | CDS  |
| hsa-miR-1271-5p | NM_001302504 | NLRC4 | 0.000250561 | CDS  |
| hsa-miR-1301-5p | NM_001302504 | NLRC4 | 1.98E-07    | CDS  |
| hsa-miR-1301-5p | NM_001302504 | NLRC4 | 7.82E-05    | CDS  |
| hsa-miR-1301-3p | NM_001302504 | NLRC4 | 0.009156693 | CDS  |
| hsa-miR-1185-5p | NM_001302504 | NLRC4 | 2.97E-05    | 5UTR |
| hsa-miR-449c-3p | NM_001302504 | NLRC4 | 0.000523865 | CDS  |
| hsa-miR-769-5p  | NM_001302504 | NLRC4 | 0.04526763  | CDS  |
| hsa-miR-769-3p  | NM_001302504 | NLRC4 | 0.000592353 | CDS  |

|                   |              |       |             |      |
|-------------------|--------------|-------|-------------|------|
| hsa-miR-769-3p    | NM_001302504 | NLRC4 | 2.75E-05    | 5UTR |
| hsa-miR-766-3p    | NM_001302504 | NLRC4 | 9.24E-06    | CDS  |
| hsa-miR-1185-1-3p | NM_001302504 | NLRC4 | 0.000121323 | 5UTR |
| hsa-miR-1185-1-3p | NM_001302504 | NLRC4 | 0.002677635 | CDS  |
| hsa-miR-762       | NM_001302504 | NLRC4 | 0.005727952 | 5UTR |
| hsa-miR-762       | NM_001302504 | NLRC4 | 0.000294775 | CDS  |
| hsa-miR-1298-3p   | NM_001302504 | NLRC4 | 0.004956985 | 5UTR |
| hsa-miR-2113      | NM_001302504 | NLRC4 | 0.02338689  | CDS  |
| hsa-miR-761       | NM_001302504 | NLRC4 | 0.004002253 | 5UTR |
| hsa-miR-764       | NM_001302504 | NLRC4 | 0.001033441 | CDS  |
| hsa-miR-764       | NM_001302504 | NLRC4 | 0.003719112 | 5UTR |
| hsa-miR-765       | NM_001302504 | NLRC4 | 0.001018132 | 5UTR |
| hsa-miR-675-5p    | NM_001302504 | NLRC4 | 0.02559255  | 5UTR |
| hsa-miR-300       | NM_001302504 | NLRC4 | 0.03650309  | 5UTR |
| hsa-miR-450b-3p   | NM_001302504 | NLRC4 | 0.000808708 | CDS  |
| hsa-miR-450b-3p   | NM_001302504 | NLRC4 | 1.35E-05    | CDS  |
| hsa-miR-874-5p    | NM_001302504 | NLRC4 | 0.002426029 | CDS  |
| hsa-miR-874-5p    | NM_001302504 | NLRC4 | 0.008691157 | 5UTR |
| hsa-miR-874-3p    | NM_001302504 | NLRC4 | 6.18E-05    | CDS  |
| hsa-miR-874-3p    | NM_001302504 | NLRC4 | 3.81E-05    | CDS  |
| hsa-miR-888-5p    | NM_001302504 | NLRC4 | 0.000293519 | CDS  |
| hsa-miR-888-3p    | NM_001302504 | NLRC4 | 0.000262096 | 5UTR |
| hsa-miR-892b      | NM_001302504 | NLRC4 | 0.004040886 | 5UTR |
| hsa-miR-541-5p    | NM_001302504 | NLRC4 | 0.03761182  | CDS  |
| hsa-miR-541-3p    | NM_001302504 | NLRC4 | 3.28E-05    | 5UTR |
| hsa-miR-541-3p    | NM_001302504 | NLRC4 | 0.001931775 | CDS  |
| hsa-miR-889-5p    | NM_001302504 | NLRC4 | 0.000170659 | CDS  |
| hsa-miR-875-3p    | NM_001302504 | NLRC4 | 0.000388466 | CDS  |
| hsa-miR-876-5p    | NM_001302504 | NLRC4 | 0.01472951  | CDS  |
| hsa-miR-708-5p    | NM_001302504 | NLRC4 | 0.002213432 | CDS  |
| hsa-miR-744-5p    | NM_001302504 | NLRC4 | 0.006363825 | 5UTR |
| hsa-miR-744-5p    | NM_001302504 | NLRC4 | 1.14E-07    | CDS  |
| hsa-miR-885-3p    | NM_001302504 | NLRC4 | 0.000105297 | CDS  |
| hsa-miR-885-3p    | NM_001302504 | NLRC4 | 0.001687649 | 5UTR |
| hsa-miR-885-3p    | NM_001302504 | NLRC4 | 0.006459822 | CDS  |
| hsa-miR-877-5p    | NM_001302504 | NLRC4 | 0.01148179  | CDS  |
| hsa-miR-877-3p    | NM_001302504 | NLRC4 | 0.05096433  | 5UTR |
| hsa-miR-887-3p    | NM_001302504 | NLRC4 | 9.29E-05    | CDS  |
| hsa-miR-665       | NM_001302504 | NLRC4 | 0.000132151 | CDS  |
| hsa-miR-665       | NM_001302504 | NLRC4 | 2.73E-06    | CDS  |
| hsa-miR-873-5p    | NM_001302504 | NLRC4 | 0.003518183 | CDS  |
| hsa-miR-873-3p    | NM_001302504 | NLRC4 | 0.01313369  | CDS  |
| hsa-miR-873-3p    | NM_001302504 | NLRC4 | 0.000321069 | CDS  |
| hsa-miR-374b-3p   | NM_001302504 | NLRC4 | 0.003455527 | CDS  |

|                  |              |       |             |      |
|------------------|--------------|-------|-------------|------|
| hsa-miR-760      | NM_001302504 | NLRC4 | 0.0532159   | CDS  |
| hsa-miR-301b-5p  | NM_001302504 | NLRC4 | 0.004956985 | 5UTR |
| hsa-miR-921      | NM_001302504 | NLRC4 | 0.007968493 | CDS  |
| hsa-miR-922      | NM_001302504 | NLRC4 | 0.01148179  | CDS  |
| hsa-miR-509-3-5p | NM_001302504 | NLRC4 | 0.000502803 | CDS  |
| hsa-miR-933      | NM_001302504 | NLRC4 | 0.000603841 | 5UTR |
| hsa-miR-935      | NM_001302504 | NLRC4 | 0.00021044  | 5UTR |
| hsa-miR-937-5p   | NM_001302504 | NLRC4 | 0.002220645 | 5UTR |
| hsa-miR-937-5p   | NM_001302504 | NLRC4 | 0.003661642 | CDS  |
| hsa-miR-937-5p   | NM_001302504 | NLRC4 | 0.000977407 | CDS  |
| hsa-miR-938      | NM_001302504 | NLRC4 | 0.001887768 | 5UTR |
| hsa-miR-939-3p   | NM_001302504 | NLRC4 | 0.000225565 | CDS  |
| hsa-miR-939-3p   | NM_001302504 | NLRC4 | 0.02225154  | 5UTR |
| hsa-miR-940      | NM_001302504 | NLRC4 | 0.03853794  | 5UTR |
| hsa-miR-1178-3p  | NM_001302504 | NLRC4 | 0.003923357 | CDS  |
| hsa-miR-1178-3p  | NM_001302504 | NLRC4 | 0.05235348  | 5UTR |
| hsa-miR-1180-3p  | NM_001302504 | NLRC4 | 4.78E-05    | 5UTR |
| hsa-miR-1181     | NM_001302504 | NLRC4 | 0.06641009  | CDS  |
| hsa-miR-1181     | NM_001302504 | NLRC4 | 0.005613622 | CDS  |
| hsa-miR-1182     | NM_001302504 | NLRC4 | 0.02261598  | CDS  |
| hsa-miR-1182     | NM_001302504 | NLRC4 | 0.004916043 | 5UTR |
| hsa-miR-1182     | NM_001302504 | NLRC4 | 0.001881273 | CDS  |
| hsa-miR-1183     | NM_001302504 | NLRC4 | 0.003230363 | 5UTR |
| hsa-miR-1184     | NM_001302504 | NLRC4 | 0.000389944 | CDS  |
| hsa-miR-1225-3p  | NM_001302504 | NLRC4 | 0.02225154  | 5UTR |
| hsa-miR-1226-5p  | NM_001302504 | NLRC4 | 0.001710859 | 5UTR |
| hsa-miR-1227-5p  | NM_001302504 | NLRC4 | 9.02E-05    | CDS  |
| hsa-miR-1227-3p  | NM_001302504 | NLRC4 | 0.000196593 | CDS  |
| hsa-miR-1228-5p  | NM_001302504 | NLRC4 | 0.002007726 | 5UTR |
| hsa-miR-1228-5p  | NM_001302504 | NLRC4 | 0.003007178 | 5UTR |
| hsa-miR-1228-5p  | NM_001302504 | NLRC4 | 0.000262096 | 5UTR |
| hsa-miR-1229-5p  | NM_001302504 | NLRC4 | 0.002220645 | 5UTR |
| hsa-miR-1229-5p  | NM_001302504 | NLRC4 | 0.000129336 | CDS  |
| hsa-miR-1231     | NM_001302504 | NLRC4 | 0.03581307  | CDS  |
| hsa-miR-1233-5p  | NM_001302504 | NLRC4 | 0.002389222 | CDS  |
| hsa-miR-1233-5p  | NM_001302504 | NLRC4 | 2.42E-06    | CDS  |
| hsa-miR-1233-3p  | NM_001302504 | NLRC4 | 0.00013022  | CDS  |
| hsa-miR-1236-3p  | NM_001302504 | NLRC4 | 0.003803932 | CDS  |
| hsa-miR-1237-5p  | NM_001302504 | NLRC4 | 3.28E-05    | 5UTR |
| hsa-miR-1237-3p  | NM_001302504 | NLRC4 | 0.000719145 | CDS  |
| hsa-miR-1202     | NM_001302504 | NLRC4 | 0.000502803 | CDS  |
| hsa-miR-663b     | NM_001302504 | NLRC4 | 0.000167343 | CDS  |
| hsa-miR-1205     | NM_001302504 | NLRC4 | 0.002435779 | CDS  |
| hsa-miR-1207-5p  | NM_001302504 | NLRC4 | 0.004040886 | 5UTR |

|                    |              |       |             |      |
|--------------------|--------------|-------|-------------|------|
| hsa-miR-1207-5p    | NM_001302504 | NLRC4 | 0.000605168 | CDS  |
| hsa-miR-1208       | NM_001302504 | NLRC4 | 0.00011008  | CDS  |
| hsa-miR-1285-5p    | NM_001302504 | NLRC4 | 0.002434622 | CDS  |
| hsa-miR-1285-5p    | NM_001302504 | NLRC4 | 0.05384545  | CDS  |
| hsa-miR-1285-3p    | NM_001302504 | NLRC4 | 0.004956985 | 5UTR |
| hsa-miR-1285-3p    | NM_001302504 | NLRC4 | 0.000228018 | CDS  |
| hsa-miR-1286       | NM_001302504 | NLRC4 | 0.000529345 | CDS  |
| hsa-miR-1287-5p    | NM_001302504 | NLRC4 | 0.03853267  | CDS  |
| hsa-miR-1287-3p    | NM_001302504 | NLRC4 | 0.000378314 | CDS  |
| hsa-miR-1291       | NM_001302504 | NLRC4 | 0.02225154  | 5UTR |
| hsa-miR-1293       | NM_001302504 | NLRC4 | 0.01861651  | CDS  |
| hsa-miR-1293       | NM_001302504 | NLRC4 | 0.003719112 | 5UTR |
| hsa-miR-1294       | NM_001302504 | NLRC4 | 0.001710859 | CDS  |
| hsa-miR-1295a      | NM_001302504 | NLRC4 | 0.01236446  | 5UTR |
| hsa-miR-1299       | NM_001302504 | NLRC4 | 0.06960116  | CDS  |
| hsa-miR-1303       | NM_001302504 | NLRC4 | 0.000260618 | CDS  |
| hsa-miR-1245a      | NM_001302504 | NLRC4 | 0.000167343 | CDS  |
| hsa-miR-1247-5p    | NM_001302504 | NLRC4 | 0.00013388  | CDS  |
| hsa-miR-1248       | NM_001302504 | NLRC4 | 0.000225565 | CDS  |
| hsa-miR-1249-5p    | NM_001302504 | NLRC4 | 0.001549639 | CDS  |
| hsa-miR-1250-5p    | NM_001302504 | NLRC4 | 0.03260867  | CDS  |
| hsa-miR-1257       | NM_001302504 | NLRC4 | 0.01718499  | CDS  |
| hsa-miR-1258       | NM_001302504 | NLRC4 | 0.04340877  | CDS  |
| hsa-miR-1261       | NM_001302504 | NLRC4 | 0.000977407 | CDS  |
| hsa-miR-1261       | NM_001302504 | NLRC4 | 0.02787945  | CDS  |
| hsa-miR-1266-5p    | NM_001302504 | NLRC4 | 2.23E-07    | CDS  |
| hsa-miR-1266-5p    | NM_001302504 | NLRC4 | 0.01083776  | 5UTR |
| hsa-miR-1266-3p    | NM_001302504 | NLRC4 | 0.02225154  | 5UTR |
| hsa-miR-1266-3p    | NM_001302504 | NLRC4 | 0.000477134 | CDS  |
| hsa-miR-1268a      | NM_001302504 | NLRC4 | 0.000952318 | CDS  |
| hsa-miR-1272       | NM_001302504 | NLRC4 | 2.91E-05    | 5UTR |
| hsa-miR-1272       | NM_001302504 | NLRC4 | 0.01064677  | CDS  |
| hsa-miR-1281       | NM_001302504 | NLRC4 | 0.003672413 | CDS  |
| hsa-miR-1288-3p    | NM_001302504 | NLRC4 | 2.45E-05    | 5UTR |
| hsa-miR-1292-5p    | NM_001302504 | NLRC4 | 0.03090052  | CDS  |
| hsa-miR-1292-5p    | NM_001302504 | NLRC4 | 8.08E-05    | 5UTR |
| hsa-miR-1292-3p    | NM_001302504 | NLRC4 | 0.000201083 | CDS  |
| hsa-miR-1292-3p    | NM_001302504 | NLRC4 | 4.02E-07    | CDS  |
| hsa-miR-1255b-2-3p | NM_001302504 | NLRC4 | 5.87E-05    | CDS  |
| hsa-miR-664a-5p    | NM_001302504 | NLRC4 | 0.008742791 | CDS  |
| hsa-miR-1307-5p    | NM_001302504 | NLRC4 | 6.00E-05    | CDS  |
| hsa-miR-1307-3p    | NM_001302504 | NLRC4 | 3.70E-07    | CDS  |
| hsa-miR-513c-5p    | NM_001302504 | NLRC4 | 0.01318848  | CDS  |
| hsa-miR-513c-3p    | NM_001302504 | NLRC4 | 0.001300536 | 5UTR |

|                 |              |       |             |      |
|-----------------|--------------|-------|-------------|------|
| hsa-miR-1322    | NM_001302504 | NLRC4 | 0.02853091  | CDS  |
| hsa-miR-1322    | NM_001302504 | NLRC4 | 2.91E-05    | 5UTR |
| hsa-miR-1197    | NM_001302504 | NLRC4 | 0.02256466  | 5UTR |
| hsa-miR-1469    | NM_001302504 | NLRC4 | 6.71E-05    | 5UTR |
| hsa-miR-1469    | NM_001302504 | NLRC4 | 0.01083776  | 5UTR |
| hsa-miR-1470    | NM_001302504 | NLRC4 | 9.15E-06    | 5UTR |
| hsa-miR-1537-5p | NM_001302504 | NLRC4 | 5.51E-05    | CDS  |
| hsa-miR-1538    | NM_001302504 | NLRC4 | 0.002434622 | CDS  |
| hsa-miR-1539    | NM_001302504 | NLRC4 | 4.54E-05    | CDS  |
| hsa-miR-1539    | NM_001302504 | NLRC4 | 0.02225154  | 5UTR |
| hsa-miR-103b    | NM_001302504 | NLRC4 | 4.02E-07    | CDS  |
| hsa-miR-1825    | NM_001302504 | NLRC4 | 0.000477204 | CDS  |
| hsa-miR-1908-5p | NM_001302504 | NLRC4 | 0.004002253 | 5UTR |
| hsa-miR-1908-5p | NM_001302504 | NLRC4 | 5.03E-05    | 5UTR |
| hsa-miR-1908-3p | NM_001302504 | NLRC4 | 8.09E-06    | CDS  |
| hsa-miR-1908-3p | NM_001302504 | NLRC4 | 5.14E-05    | CDS  |
| hsa-miR-1909-5p | NM_001302504 | NLRC4 | 0.003503197 | CDS  |
| hsa-miR-1909-3p | NM_001302504 | NLRC4 | 0.006363825 | 5UTR |
| hsa-miR-1910-5p | NM_001302504 | NLRC4 | 0.04304292  | 5UTR |
| hsa-miR-1910-5p | NM_001302504 | NLRC4 | 0.000492336 | CDS  |
| hsa-miR-1910-3p | NM_001302504 | NLRC4 | 0.004462303 | CDS  |
| hsa-miR-1912-3p | NM_001302504 | NLRC4 | 3.70E-07    | CDS  |
| hsa-miR-1913    | NM_001302504 | NLRC4 | 0.003672413 | CDS  |
| hsa-miR-1913    | NM_001302504 | NLRC4 | 7.91E-05    | CDS  |
| hsa-miR-1914-5p | NM_001302504 | NLRC4 | 0.02225154  | 5UTR |
| hsa-miR-1914-3p | NM_001302504 | NLRC4 | 5.60E-05    | CDS  |
| hsa-miR-1915-5p | NM_001302504 | NLRC4 | 4.54E-05    | CDS  |
| hsa-miR-1915-5p | NM_001302504 | NLRC4 | 0.01135416  | 5UTR |
| hsa-miR-1915-3p | NM_001302504 | NLRC4 | 2.23E-07    | CDS  |
| hsa-miR-1915-3p | NM_001302504 | NLRC4 | 6.23E-05    | 5UTR |
| hsa-miR-1972    | NM_001302504 | NLRC4 | 3.15E-05    | CDS  |
| hsa-miR-1972    | NM_001302504 | NLRC4 | 0.008691157 | 5UTR |
| hsa-miR-1976    | NM_001302504 | NLRC4 | 0.000244245 | CDS  |
| hsa-miR-2114-3p | NM_001302504 | NLRC4 | 3.70E-05    | CDS  |
| hsa-miR-2115-3p | NM_001302504 | NLRC4 | 0.01648264  | CDS  |
| hsa-miR-2115-3p | NM_001302504 | NLRC4 | 0.001205514 | CDS  |
| hsa-miR-2116-5p | NM_001302504 | NLRC4 | 0.005382567 | 5UTR |
| hsa-miR-2116-3p | NM_001302504 | NLRC4 | 0.02569602  | 5UTR |
| hsa-miR-2276-5p | NM_001302504 | NLRC4 | 0.000137813 | CDS  |
| hsa-miR-2276-3p | NM_001302504 | NLRC4 | 0.004956985 | 5UTR |
| hsa-miR-2276-3p | NM_001302504 | NLRC4 | 0.000354811 | CDS  |
| hsa-miR-2277-5p | NM_001302504 | NLRC4 | 0.001033441 | CDS  |
| hsa-miR-2277-3p | NM_001302504 | NLRC4 | 0.000108131 | CDS  |
| hsa-miR-2277-3p | NM_001302504 | NLRC4 | 8.09E-06    | CDS  |

|                  |              |       |             |      |
|------------------|--------------|-------|-------------|------|
| hsa-miR-2277-3p  | NM_001302504 | NLRC4 | 0.000733641 | 5UTR |
| hsa-miR-2278     | NM_001302504 | NLRC4 | 0.003822677 | 5UTR |
| hsa-miR-2682-5p  | NM_001302504 | NLRC4 | 0.003518762 | CDS  |
| hsa-miR-2682-3p  | NM_001302504 | NLRC4 | 0.000215389 | CDS  |
| hsa-miR-718      | NM_001302504 | NLRC4 | 1.34E-05    | 5UTR |
| hsa-miR-2861     | NM_001302504 | NLRC4 | 9.02E-05    | CDS  |
| hsa-miR-2861     | NM_001302504 | NLRC4 | 0.00303577  | CDS  |
| hsa-miR-3117-3p  | NM_001302504 | NLRC4 | 6.47E-06    | CDS  |
| hsa-miR-3120-5p  | NM_001302504 | NLRC4 | 0.001137387 | CDS  |
| hsa-miR-3120-3p  | NM_001302504 | NLRC4 | 9.39E-05    | CDS  |
| hsa-miR-3124-5p  | NM_001302504 | NLRC4 | 0.004769708 | CDS  |
| hsa-miR-3124-3p  | NM_001302504 | NLRC4 | 0.02111429  | CDS  |
| hsa-miR-3126-5p  | NM_001302504 | NLRC4 | 0.001764953 | 5UTR |
| hsa-miR-3126-3p  | NM_001302504 | NLRC4 | 0.004956985 | 5UTR |
| hsa-miR-3127-3p  | NM_001302504 | NLRC4 | 0.000225565 | CDS  |
| hsa-miR-3127-3p  | NM_001302504 | NLRC4 | 0.008049726 | CDS  |
| hsa-miR-3129-5p  | NM_001302504 | NLRC4 | 0.01148179  | CDS  |
| hsa-miR-3130-5p  | NM_001302504 | NLRC4 | 2.36E-05    | 5UTR |
| hsa-miR-3130-5p  | NM_001302504 | NLRC4 | 0.000137813 | CDS  |
| hsa-miR-3132     | NM_001302504 | NLRC4 | 0.000605168 | CDS  |
| hsa-miR-3135a    | NM_001302504 | NLRC4 | 0.000293519 | CDS  |
| hsa-miR-3136-5p  | NM_001302504 | NLRC4 | 0.003230363 | 5UTR |
| hsa-miR-3136-3p  | NM_001302504 | NLRC4 | 0.000271192 | CDS  |
| hsa-miR-3136-3p  | NM_001302504 | NLRC4 | 0.00503807  | CDS  |
| hsa-miR-3137     | NM_001302504 | NLRC4 | 0.000502803 | CDS  |
| hsa-miR-3138     | NM_001302504 | NLRC4 | 0.000502803 | CDS  |
| hsa-miR-3140-3p  | NM_001302504 | NLRC4 | 0.0051834   | CDS  |
| hsa-miR-3141     | NM_001302504 | NLRC4 | 0.000605168 | CDS  |
| hsa-miR-3141     | NM_001302504 | NLRC4 | 9.02E-05    | CDS  |
| hsa-miR-3142     | NM_001302504 | NLRC4 | 3.04E-06    | CDS  |
| hsa-miR-3147     | NM_001302504 | NLRC4 | 0.001567866 | CDS  |
| hsa-miR-548v     | NM_001302504 | NLRC4 | 0.000812999 | CDS  |
| hsa-miR-3150a-3p | NM_001302504 | NLRC4 | 3.28E-05    | 5UTR |
| hsa-miR-3151-5p  | NM_001302504 | NLRC4 | 0.02559255  | 5UTR |
| hsa-miR-3152-3p  | NM_001302504 | NLRC4 | 0.01289354  | CDS  |
| hsa-miR-3153     | NM_001302504 | NLRC4 | 0.000605168 | CDS  |
| hsa-miR-3074-5p  | NM_001302504 | NLRC4 | 0.000660805 | CDS  |
| hsa-miR-3074-3p  | NM_001302504 | NLRC4 | 0.01236446  | 5UTR |
| hsa-miR-3155a    | NM_001302504 | NLRC4 | 0.000952318 | CDS  |
| hsa-miR-3155a    | NM_001302504 | NLRC4 | 5.82E-05    | CDS  |
| hsa-miR-3156-5p  | NM_001302504 | NLRC4 | 0.004462303 | CDS  |
| hsa-miR-3156-3p  | NM_001302504 | NLRC4 | 4.78E-05    | 5UTR |
| hsa-miR-3157-5p  | NM_001302504 | NLRC4 | 0.000526611 | CDS  |
| hsa-miR-3157-5p  | NM_001302504 | NLRC4 | 0.004769708 | CDS  |



|                 |              |       |             |      |
|-----------------|--------------|-------|-------------|------|
| hsa-miR-3157-3p | NM_001302504 | NLRC4 | 0.000140506 | CDS  |
| hsa-miR-3158-3p | NM_001302504 | NLRC4 | 0.003328804 | 5UTR |
| hsa-miR-3158-3p | NM_001302504 | NLRC4 | 0.002580033 | CDS  |
| hsa-miR-3160-5p | NM_001302504 | NLRC4 | 0.002426029 | CDS  |
| hsa-miR-3160-5p | NM_001302504 | NLRC4 | 0.00199289  | CDS  |
| hsa-miR-3162-5p | NM_001302504 | NLRC4 | 0.002744245 | 5UTR |
| hsa-miR-3165    | NM_001302504 | NLRC4 | 0.003719112 | 5UTR |
| hsa-miR-3166    | NM_001302504 | NLRC4 | 0.000605168 | CDS  |
| hsa-miR-1260b   | NM_001302504 | NLRC4 | 0.005613622 | CDS  |
| hsa-miR-3168    | NM_001302504 | NLRC4 | 0.004851312 | 5UTR |
| hsa-miR-3169    | NM_001302504 | NLRC4 | 6.99E-05    | CDS  |
| hsa-miR-3170    | NM_001302504 | NLRC4 | 0.004916043 | 5UTR |
| hsa-miR-3170    | NM_001302504 | NLRC4 | 0.02261598  | CDS  |
| hsa-miR-1193    | NM_001302504 | NLRC4 | 1.26E-05    | 5UTR |
| hsa-miR-323b-5p | NM_001302504 | NLRC4 | 0.01581897  | CDS  |
| hsa-miR-3177-5p | NM_001302504 | NLRC4 | 8.91E-06    | CDS  |
| hsa-miR-3177-3p | NM_001302504 | NLRC4 | 0.000603841 | 5UTR |
| hsa-miR-3178    | NM_001302504 | NLRC4 | 2.75E-05    | 5UTR |
| hsa-miR-3178    | NM_001302504 | NLRC4 | 0.003639629 | CDS  |
| hsa-miR-3180-3p | NM_001302504 | NLRC4 | 3.28E-05    | 5UTR |
| hsa-miR-3181    | NM_001302504 | NLRC4 | 0.005053003 | CDS  |
| hsa-miR-3183    | NM_001302504 | NLRC4 | 0.000285464 | 5UTR |
| hsa-miR-3184-5p | NM_001302504 | NLRC4 | 0.000248928 | CDS  |
| hsa-miR-3184-5p | NM_001302504 | NLRC4 | 0.003503197 | CDS  |
| hsa-miR-3185    | NM_001302504 | NLRC4 | 5.60E-05    | CDS  |
| hsa-miR-3065-3p | NM_001302504 | NLRC4 | 6.71E-05    | 5UTR |
| hsa-miR-3186-3p | NM_001302504 | NLRC4 | 0.006569541 | CDS  |
| hsa-miR-3187-5p | NM_001302504 | NLRC4 | 3.70E-07    | CDS  |
| hsa-miR-3187-3p | NM_001302504 | NLRC4 | 2.31E-05    | 5UTR |
| hsa-miR-3188    | NM_001302504 | NLRC4 | 0.001026694 | 5UTR |
| hsa-miR-3188    | NM_001302504 | NLRC4 | 7.49E-05    | CDS  |
| hsa-miR-3189-3p | NM_001302504 | NLRC4 | 0.000137813 | CDS  |
| hsa-miR-3189-3p | NM_001302504 | NLRC4 | 9.79E-05    | 5UTR |
| hsa-miR-3190-3p | NM_001302504 | NLRC4 | 0.000671587 | 5UTR |
| hsa-miR-3191-5p | NM_001302504 | NLRC4 | 0.000225565 | CDS  |
| hsa-miR-3191-3p | NM_001302504 | NLRC4 | 3.28E-05    | 5UTR |
| hsa-miR-3192-5p | NM_001302504 | NLRC4 | 0.004956985 | 5UTR |
| hsa-miR-3192-5p | NM_001302504 | NLRC4 | 4.78E-05    | 5UTR |
| hsa-miR-3192-5p | NM_001302504 | NLRC4 | 0.08763861  | CDS  |
| hsa-miR-3193    | NM_001302504 | NLRC4 | 0.008213843 | CDS  |
| hsa-miR-3194-5p | NM_001302504 | NLRC4 | 7.51E-05    | CDS  |
| hsa-miR-3194-3p | NM_001302504 | NLRC4 | 4.02E-06    | CDS  |
| hsa-miR-3195    | NM_001302504 | NLRC4 | 0.03650309  | 5UTR |
| hsa-miR-3196    | NM_001302504 | NLRC4 | 6.00E-06    | CDS  |

|                 |              |       |             |      |
|-----------------|--------------|-------|-------------|------|
| hsa-miR-3196    | NM_001302504 | NLRC4 | 0.006459822 | CDS  |
| hsa-miR-3197    | NM_001302504 | NLRC4 | 0.00303577  | CDS  |
| hsa-miR-3198    | NM_001302504 | NLRC4 | 0.002061538 | CDS  |
| hsa-miR-3198    | NM_001302504 | NLRC4 | 2.42E-06    | CDS  |
| hsa-miR-3200-5p | NM_001302504 | NLRC4 | 0.004956985 | 5UTR |
| hsa-miR-3200-3p | NM_001302504 | NLRC4 | 4.54E-05    | CDS  |
| hsa-miR-514b-5p | NM_001302504 | NLRC4 | 0.01318848  | CDS  |
| hsa-miR-514b-3p | NM_001302504 | NLRC4 | 2.21E-05    | 5UTR |
| hsa-miR-4296    | NM_001302504 | NLRC4 | 0.000248928 | CDS  |
| hsa-miR-4296    | NM_001302504 | NLRC4 | 0.005126806 | CDS  |
| hsa-miR-378c    | NM_001302504 | NLRC4 | 0.001427119 | CDS  |
| hsa-miR-4298    | NM_001302504 | NLRC4 | 0.000502803 | CDS  |
| hsa-miR-4298    | NM_001302504 | NLRC4 | 0.007500403 | CDS  |
| hsa-miR-4298    | NM_001302504 | NLRC4 | 0.003230363 | 5UTR |
| hsa-miR-4304    | NM_001302504 | NLRC4 | 4.54E-05    | CDS  |
| hsa-miR-4302    | NM_001302504 | NLRC4 | 0.000778346 | CDS  |
| hsa-miR-4303    | NM_001302504 | NLRC4 | 0.08531005  | CDS  |
| hsa-miR-4310    | NM_001302504 | NLRC4 | 6.41E-06    | CDS  |
| hsa-miR-4312    | NM_001302504 | NLRC4 | 0.02225154  | 5UTR |
| hsa-miR-4315    | NM_001302504 | NLRC4 | 0.000582754 | CDS  |
| hsa-miR-4315    | NM_001302504 | NLRC4 | 0.002083594 | CDS  |
| hsa-miR-4320    | NM_001302504 | NLRC4 | 3.04E-06    | CDS  |
| hsa-miR-4322    | NM_001302504 | NLRC4 | 0.01012803  | 5UTR |
| hsa-miR-4321    | NM_001302504 | NLRC4 | 5.44E-05    | 5UTR |
| hsa-miR-4257    | NM_001302504 | NLRC4 | 0.001931775 | CDS  |
| hsa-miR-4253    | NM_001302504 | NLRC4 | 0.005727952 | 5UTR |
| hsa-miR-4254    | NM_001302504 | NLRC4 | 1.35E-05    | CDS  |
| hsa-miR-4254    | NM_001302504 | NLRC4 | 0.000233119 | 5UTR |
| hsa-miR-4326    | NM_001302504 | NLRC4 | 0.03262098  | 5UTR |
| hsa-miR-4327    | NM_001302504 | NLRC4 | 0.001564227 | CDS  |
| hsa-miR-4327    | NM_001302504 | NLRC4 | 0.000262096 | 5UTR |
| hsa-miR-4265    | NM_001302504 | NLRC4 | 6.75E-07    | CDS  |
| hsa-miR-4268    | NM_001302504 | NLRC4 | 0.00303577  | CDS  |
| hsa-miR-4269    | NM_001302504 | NLRC4 | 0.002426029 | CDS  |
| hsa-miR-4270    | NM_001302504 | NLRC4 | 0.01236446  | 5UTR |
| hsa-miR-4273    | NM_001302504 | NLRC4 | 0.01102812  | 5UTR |
| hsa-miR-4274    | NM_001302504 | NLRC4 | 8.09E-06    | CDS  |
| hsa-miR-4274    | NM_001302504 | NLRC4 | 0.002222065 | CDS  |
| hsa-miR-4281    | NM_001302504 | NLRC4 | 1.04E-07    | CDS  |
| hsa-miR-4277    | NM_001302504 | NLRC4 | 0.006363825 | 5UTR |
| hsa-miR-4279    | NM_001302504 | NLRC4 | 0.003803932 | CDS  |
| hsa-miR-4278    | NM_001302504 | NLRC4 | 0.007968493 | CDS  |
| hsa-miR-4278    | NM_001302504 | NLRC4 | 0.001637361 | CDS  |
| hsa-miR-4280    | NM_001302504 | NLRC4 | 0.03581307  | CDS  |

|                  |              |       |             |      |
|------------------|--------------|-------|-------------|------|
| hsa-miR-4287     | NM_001302504 | NLRC4 | 0.000161927 | CDS  |
| hsa-miR-4288     | NM_001302504 | NLRC4 | 0.007958347 | CDS  |
| hsa-miR-4329     | NM_001302504 | NLRC4 | 0.000477134 | CDS  |
| hsa-miR-500b-3p  | NM_001302504 | NLRC4 | 0.000201083 | CDS  |
| hsa-miR-4328     | NM_001302504 | NLRC4 | 0.0002172   | CDS  |
| hsa-miR-3613-5p  | NM_001302504 | NLRC4 | 0.06825774  | 5UTR |
| hsa-miR-3614-5p  | NM_001302504 | NLRC4 | 0.001886311 | 5UTR |
| hsa-miR-3614-5p  | NM_001302504 | NLRC4 | 0.01354809  | CDS  |
| hsa-miR-3615     | NM_001302504 | NLRC4 | 7.91E-05    | CDS  |
| hsa-miR-3615     | NM_001302504 | NLRC4 | 6.75E-07    | CDS  |
| hsa-miR-3616-5p  | NM_001302504 | NLRC4 | 0.01648264  | CDS  |
| hsa-miR-3616-3p  | NM_001302504 | NLRC4 | 0.01354809  | CDS  |
| hsa-miR-3617-3p  | NM_001302504 | NLRC4 | 0.001671502 | CDS  |
| hsa-miR-3619-5p  | NM_001302504 | NLRC4 | 0.003455527 | CDS  |
| hsa-miR-3619-5p  | NM_001302504 | NLRC4 | 0.01236446  | 5UTR |
| hsa-miR-3619-3p  | NM_001302504 | NLRC4 | 0.00303577  | CDS  |
| hsa-miR-3620-5p  | NM_001302504 | NLRC4 | 0.002220645 | 5UTR |
| hsa-miR-3621     | NM_001302504 | NLRC4 | 1.39E-05    | CDS  |
| hsa-miR-3621     | NM_001302504 | NLRC4 | 0.005727952 | 5UTR |
| hsa-miR-3621     | NM_001302504 | NLRC4 | 0.002757795 | CDS  |
| hsa-miR-3622b-5p | NM_001302504 | NLRC4 | 0.01218382  | CDS  |
| hsa-miR-3622b-5p | NM_001302504 | NLRC4 | 0.001202517 | 5UTR |
| hsa-miR-3648     | NM_001302504 | NLRC4 | 7.36E-05    | 5UTR |
| hsa-miR-3648     | NM_001302504 | NLRC4 | 0.01442079  | 5UTR |
| hsa-miR-3650     | NM_001302504 | NLRC4 | 0.01182994  | CDS  |
| hsa-miR-3650     | NM_001302504 | NLRC4 | 0.003719112 | 5UTR |
| hsa-miR-3651     | NM_001302504 | NLRC4 | 0.000170659 | CDS  |
| hsa-miR-3652     | NM_001302504 | NLRC4 | 0.001567866 | CDS  |
| hsa-miR-3654     | NM_001302504 | NLRC4 | 0.004462303 | CDS  |
| hsa-miR-3659     | NM_001302504 | NLRC4 | 0.008780717 | 5UTR |
| hsa-miR-3662     | NM_001302504 | NLRC4 | 0.001564227 | CDS  |
| hsa-miR-3663-3p  | NM_001302504 | NLRC4 | 0.000108131 | CDS  |
| hsa-miR-3664-3p  | NM_001302504 | NLRC4 | 0.000290042 | 5UTR |
| hsa-miR-3665     | NM_001302504 | NLRC4 | 1.14E-07    | CDS  |
| hsa-miR-3665     | NM_001302504 | NLRC4 | 0.001742576 | CDS  |
| hsa-miR-3667-3p  | NM_001302504 | NLRC4 | 0.000120074 | CDS  |
| hsa-miR-3675-5p  | NM_001302504 | NLRC4 | 0.003328804 | 5UTR |
| hsa-miR-3677-3p  | NM_001302504 | NLRC4 | 0.001763547 | CDS  |
| hsa-miR-3677-3p  | NM_001302504 | NLRC4 | 0.000313265 | CDS  |
| hsa-miR-3679-5p  | NM_001302504 | NLRC4 | 0.002007726 | 5UTR |
| hsa-miR-3680-3p  | NM_001302504 | NLRC4 | 4.54E-05    | CDS  |
| hsa-miR-3680-3p  | NM_001302504 | NLRC4 | 5.03E-05    | 5UTR |
| hsa-miR-3680-3p  | NM_001302504 | NLRC4 | 0.000317398 | CDS  |
| hsa-miR-3681-5p  | NM_001302504 | NLRC4 | 0.01718499  | CDS  |

|                  |              |       |             |      |
|------------------|--------------|-------|-------------|------|
| hsa-miR-3690     | NM_001302504 | NLRC4 | 0.001427119 | CDS  |
| hsa-miR-3691-5p  | NM_001302504 | NLRC4 | 0.000977407 | CDS  |
| hsa-miR-3692-5p  | NM_001302504 | NLRC4 | 0.03853267  | CDS  |
| hsa-miR-3692-3p  | NM_001302504 | NLRC4 | 7.82E-05    | CDS  |
| hsa-miR-3714     | NM_001302504 | NLRC4 | 7.45E-06    | CDS  |
| hsa-miR-3907     | NM_001302504 | NLRC4 | 0.000294775 | CDS  |
| hsa-miR-3908     | NM_001302504 | NLRC4 | 0.006459822 | CDS  |
| hsa-miR-3909     | NM_001302504 | NLRC4 | 2.25E-06    | CDS  |
| hsa-miR-3909     | NM_001302504 | NLRC4 | 0.000225565 | CDS  |
| hsa-miR-3911     | NM_001302504 | NLRC4 | 0.007781444 | 5UTR |
| hsa-miR-3913-5p  | NM_001302504 | NLRC4 | 0.000592353 | CDS  |
| hsa-miR-3917     | NM_001302504 | NLRC4 | 0.01083776  | 5UTR |
| hsa-miR-3918     | NM_001302504 | NLRC4 | 0.002435779 | CDS  |
| hsa-miR-3918     | NM_001302504 | NLRC4 | 0.000952318 | CDS  |
| hsa-miR-3918     | NM_001302504 | NLRC4 | 0.008644879 | 5UTR |
| hsa-miR-3150b-5p | NM_001302504 | NLRC4 | 6.18E-05    | CDS  |
| hsa-miR-3150b-5p | NM_001302504 | NLRC4 | 6.23E-05    | 5UTR |
| hsa-miR-3922-5p  | NM_001302504 | NLRC4 | 8.08E-05    | 5UTR |
| hsa-miR-3923     | NM_001302504 | NLRC4 | 0.000498853 | CDS  |
| hsa-miR-3925-3p  | NM_001302504 | NLRC4 | 0.01665946  | 5UTR |
| hsa-miR-3927-3p  | NM_001302504 | NLRC4 | 0.01804454  | CDS  |
| hsa-miR-3928-5p  | NM_001302504 | NLRC4 | 2.13E-05    | CDS  |
| hsa-miR-3929     | NM_001302504 | NLRC4 | 3.30E-05    | CDS  |
| hsa-miR-3934-3p  | NM_001302504 | NLRC4 | 1.68E-06    | CDS  |
| hsa-miR-3936     | NM_001302504 | NLRC4 | 0.001026694 | 5UTR |
| hsa-miR-3940-5p  | NM_001302504 | NLRC4 | 0.006363825 | 5UTR |
| hsa-miR-3940-5p  | NM_001302504 | NLRC4 | 0.000977407 | CDS  |
| hsa-miR-3940-3p  | NM_001302504 | NLRC4 | 0.000337189 | 5UTR |
| hsa-miR-3944-5p  | NM_001302504 | NLRC4 | 0.000507522 | CDS  |
| hsa-miR-3944-3p  | NM_001302504 | NLRC4 | 4.59E-06    | CDS  |
| hsa-miR-3944-3p  | NM_001302504 | NLRC4 | 0.000378314 | CDS  |
| hsa-miR-3945     | NM_001302504 | NLRC4 | 0.005727952 | 5UTR |
| hsa-miR-3945     | NM_001302504 | NLRC4 | 0.006459822 | CDS  |
| hsa-miR-374c-3p  | NM_001302504 | NLRC4 | 0.003455527 | CDS  |
| hsa-miR-374c-3p  | NM_001302504 | NLRC4 | 0.000108131 | CDS  |
| hsa-miR-642b-5p  | NM_001302504 | NLRC4 | 0.00011505  | CDS  |
| hsa-miR-642b-5p  | NM_001302504 | NLRC4 | 0.00303577  | CDS  |
| hsa-miR-1268b    | NM_001302504 | NLRC4 | 0.000952318 | CDS  |
| hsa-miR-378e     | NM_001302504 | NLRC4 | 0.0822863   | CDS  |
| hsa-miR-4418     | NM_001302504 | NLRC4 | 0.000529345 | CDS  |
| hsa-miR-378f     | NM_001302504 | NLRC4 | 6.47E-06    | CDS  |
| hsa-miR-4420     | NM_001302504 | NLRC4 | 0.1275675   | CDS  |
| hsa-miR-4421     | NM_001302504 | NLRC4 | 5.60E-05    | CDS  |
| hsa-miR-4425     | NM_001302504 | NLRC4 | 0.000248928 | CDS  |

|                 |              |       |             |      |
|-----------------|--------------|-------|-------------|------|
| hsa-miR-4425    | NM_001302504 | NLRC4 | 0.002140535 | CDS  |
| hsa-miR-4431    | NM_001302504 | NLRC4 | 2.15E-05    | CDS  |
| hsa-miR-4435    | NM_001302504 | NLRC4 | 0.008691157 | 5UTR |
| hsa-miR-4436a   | NM_001302504 | NLRC4 | 0.000605168 | CDS  |
| hsa-miR-4436a   | NM_001302504 | NLRC4 | 0.04340877  | CDS  |
| hsa-miR-4436a   | NM_001302504 | NLRC4 | 0.003328804 | 5UTR |
| hsa-miR-4437    | NM_001302504 | NLRC4 | 1.04E-07    | CDS  |
| hsa-miR-4439    | NM_001302504 | NLRC4 | 0.01718499  | CDS  |
| hsa-miR-4439    | NM_001302504 | NLRC4 | 0.000201083 | CDS  |
| hsa-miR-4440    | NM_001302504 | NLRC4 | 0.000235484 | CDS  |
| hsa-miR-4442    | NM_001302504 | NLRC4 | 0.000605168 | CDS  |
| hsa-miR-4442    | NM_001302504 | NLRC4 | 0.01099788  | CDS  |
| hsa-miR-4444    | NM_001302504 | NLRC4 | 0.000228018 | CDS  |
| hsa-miR-4446-5p | NM_001302504 | NLRC4 | 0.000120074 | CDS  |
| hsa-miR-4446-3p | NM_001302504 | NLRC4 | 0.008674456 | 5UTR |
| hsa-miR-4447    | NM_001302504 | NLRC4 | 0.008258314 | CDS  |
| hsa-miR-4447    | NM_001302504 | NLRC4 | 0.008037564 | CDS  |
| hsa-miR-4449    | NM_001302504 | NLRC4 | 1.98E-07    | CDS  |
| hsa-miR-4450    | NM_001302504 | NLRC4 | 0.008859692 | CDS  |
| hsa-miR-4450    | NM_001302504 | NLRC4 | 3.28E-05    | 5UTR |
| hsa-miR-3135b   | NM_001302504 | NLRC4 | 0.005382567 | 5UTR |
| hsa-miR-4462    | NM_001302504 | NLRC4 | 0.000603841 | 5UTR |
| hsa-miR-4463    | NM_001302504 | NLRC4 | 0.000427409 | CDS  |
| hsa-miR-4465    | NM_001302504 | NLRC4 | 0.000228018 | CDS  |
| hsa-miR-4466    | NM_001302504 | NLRC4 | 0.001028636 | CDS  |
| hsa-miR-4466    | NM_001302504 | NLRC4 | 6.71E-05    | 5UTR |
| hsa-miR-4466    | NM_001302504 | NLRC4 | 0.000502803 | CDS  |
| hsa-miR-4467    | NM_001302504 | NLRC4 | 0.000105297 | CDS  |
| hsa-miR-4467    | NM_001302504 | NLRC4 | 0.001687649 | 5UTR |
| hsa-miR-4469    | NM_001302504 | NLRC4 | 0.00199289  | CDS  |
| hsa-miR-4470    | NM_001302504 | NLRC4 | 0.000553642 | 5UTR |
| hsa-miR-4477b   | NM_001302504 | NLRC4 | 0.02268423  | CDS  |
| hsa-miR-3689d   | NM_001302504 | NLRC4 | 0.000640331 | 5UTR |
| hsa-miR-4479    | NM_001302504 | NLRC4 | 5.03E-05    | 5UTR |
| hsa-miR-3155b   | NM_001302504 | NLRC4 | 0.000952318 | CDS  |
| hsa-miR-3155b   | NM_001302504 | NLRC4 | 0.000128564 | CDS  |
| hsa-miR-3155b   | NM_001302504 | NLRC4 | 5.82E-05    | CDS  |
| hsa-miR-4482-3p | NM_001302504 | NLRC4 | 0.003788706 | CDS  |
| hsa-miR-4483    | NM_001302504 | NLRC4 | 0.005126806 | CDS  |
| hsa-miR-4483    | NM_001302504 | NLRC4 | 0.003719112 | 5UTR |
| hsa-miR-4484    | NM_001302504 | NLRC4 | 0.002389222 | CDS  |
| hsa-miR-4485-3p | NM_001302504 | NLRC4 | 0.000262096 | 5UTR |
| hsa-miR-4486    | NM_001302504 | NLRC4 | 0.003230363 | 5UTR |
| hsa-miR-4486    | NM_001302504 | NLRC4 | 0.000116549 | CDS  |

|                  |              |       |             |      |
|------------------|--------------|-------|-------------|------|
| hsa-miR-4488     | NM_001302504 | NLRC4 | 2.97E-05    | 5UTR |
| hsa-miR-4489     | NM_001302504 | NLRC4 | 0.005727952 | 5UTR |
| hsa-miR-4493     | NM_001302504 | NLRC4 | 5.60E-05    | CDS  |
| hsa-miR-4493     | NM_001302504 | NLRC4 | 0.000337248 | 5UTR |
| hsa-miR-4494     | NM_001302504 | NLRC4 | 0.04304292  | 5UTR |
| hsa-miR-4498     | NM_001302504 | NLRC4 | 0.003007178 | 5UTR |
| hsa-miR-4502     | NM_001302504 | NLRC4 | 1.62E-05    | 5UTR |
| hsa-miR-4505     | NM_001302504 | NLRC4 | 0.004916043 | 5UTR |
| hsa-miR-4505     | NM_001302504 | NLRC4 | 0.02599771  | CDS  |
| hsa-miR-2392     | NM_001302504 | NLRC4 | 0.000353409 | 5UTR |
| hsa-miR-2392     | NM_001302504 | NLRC4 | 0.001028636 | CDS  |
| hsa-miR-2392     | NM_001302504 | NLRC4 | 0.005759136 | CDS  |
| hsa-miR-4507     | NM_001302504 | NLRC4 | 0.003230363 | 5UTR |
| hsa-miR-4507     | NM_001302504 | NLRC4 | 0.000977407 | CDS  |
| hsa-miR-4507     | NM_001302504 | NLRC4 | 0.000129336 | CDS  |
| hsa-miR-4508     | NM_001302504 | NLRC4 | 0.006363825 | 5UTR |
| hsa-miR-4511     | NM_001302504 | NLRC4 | 0.04411314  | CDS  |
| hsa-miR-4513     | NM_001302504 | NLRC4 | 0.004462303 | CDS  |
| hsa-miR-4513     | NM_001302504 | NLRC4 | 0.000262096 | 5UTR |
| hsa-miR-4514     | NM_001302504 | NLRC4 | 0.002677635 | CDS  |
| hsa-miR-4514     | NM_001302504 | NLRC4 | 0.004040886 | 5UTR |
| hsa-miR-4514     | NM_001302504 | NLRC4 | 0.01099788  | CDS  |
| hsa-miR-4515     | NM_001302504 | NLRC4 | 0.001026694 | 5UTR |
| hsa-miR-4515     | NM_001302504 | NLRC4 | 0.002580033 | CDS  |
| hsa-miR-4519     | NM_001302504 | NLRC4 | 0.004002253 | 5UTR |
| hsa-miR-4519     | NM_001302504 | NLRC4 | 0.002536929 | CDS  |
| hsa-miR-4519     | NM_001302504 | NLRC4 | 1.14E-07    | CDS  |
| hsa-miR-4520-3p  | NM_001302504 | NLRC4 | 0.003230363 | 5UTR |
| hsa-miR-4523     | NM_001302504 | NLRC4 | 0.002744589 | CDS  |
| hsa-miR-4523     | NM_001302504 | NLRC4 | 0.000427409 | CDS  |
| hsa-miR-4524a-3p | NM_001302504 | NLRC4 | 0.001742576 | CDS  |
| hsa-miR-4525     | NM_001302504 | NLRC4 | 5.44E-05    | 5UTR |
| hsa-miR-4526     | NM_001302504 | NLRC4 | 0.000167343 | CDS  |
| hsa-miR-4526     | NM_001302504 | NLRC4 | 0.004002253 | 5UTR |
| hsa-miR-4529-5p  | NM_001302504 | NLRC4 | 0.004715198 | CDS  |
| hsa-miR-4529-3p  | NM_001302504 | NLRC4 | 1.21E-05    | CDS  |
| hsa-miR-4530     | NM_001302504 | NLRC4 | 0.004002253 | 5UTR |
| hsa-miR-4531     | NM_001302504 | NLRC4 | 0.001640847 | 5UTR |
| hsa-miR-4533     | NM_001302504 | NLRC4 | 0.004317436 | CDS  |
| hsa-miR-1587     | NM_001302504 | NLRC4 | 0.006212097 | 5UTR |
| hsa-miR-1587     | NM_001302504 | NLRC4 | 0.002020599 | CDS  |
| hsa-miR-4537     | NM_001302504 | NLRC4 | 0.000196593 | CDS  |
| hsa-miR-4538     | NM_001302504 | NLRC4 | 0.01910603  | CDS  |
| hsa-miR-4538     | NM_001302504 | NLRC4 | 0.000321069 | CDS  |

|                  |              |       |             |      |
|------------------|--------------|-------|-------------|------|
| hsa-miR-3960     | NM_001302504 | NLRC4 | 0.000105297 | CDS  |
| hsa-miR-3960     | NM_001302504 | NLRC4 | 0.000262096 | 5UTR |
| hsa-miR-3972     | NM_001302504 | NLRC4 | 3.81E-05    | CDS  |
| hsa-miR-3976     | NM_001302504 | NLRC4 | 0.006459822 | CDS  |
| hsa-miR-4632-5p  | NM_001302504 | NLRC4 | 9.02E-05    | CDS  |
| hsa-miR-4632-3p  | NM_001302504 | NLRC4 | 5.87E-05    | CDS  |
| hsa-miR-4632-3p  | NM_001302504 | NLRC4 | 0.000487376 | CDS  |
| hsa-miR-4632-3p  | NM_001302504 | NLRC4 | 0.000196593 | CDS  |
| hsa-miR-4633-3p  | NM_001302504 | NLRC4 | 0.000294775 | CDS  |
| hsa-miR-4634     | NM_001302504 | NLRC4 | 1.39E-05    | CDS  |
| hsa-miR-4638-5p  | NM_001302504 | NLRC4 | 0.00011008  | CDS  |
| hsa-miR-4638-5p  | NM_001302504 | NLRC4 | 0.000271192 | CDS  |
| hsa-miR-4638-3p  | NM_001302504 | NLRC4 | 0.000388466 | CDS  |
| hsa-miR-4640-5p  | NM_001302504 | NLRC4 | 3.28E-05    | 5UTR |
| hsa-miR-4641     | NM_001302504 | NLRC4 | 0.00013388  | CDS  |
| hsa-miR-4642     | NM_001302504 | NLRC4 | 0.007026662 | CDS  |
| hsa-miR-4646-5p  | NM_001302504 | NLRC4 | 0.000601154 | CDS  |
| hsa-miR-4646-3p  | NM_001302504 | NLRC4 | 0.000148632 | CDS  |
| hsa-miR-4647     | NM_001302504 | NLRC4 | 0.04411314  | CDS  |
| hsa-miR-4648     | NM_001302504 | NLRC4 | 0.000248928 | CDS  |
| hsa-miR-4649-5p  | NM_001302504 | NLRC4 | 0.003007178 | 5UTR |
| hsa-miR-4649-5p  | NM_001302504 | NLRC4 | 0.000427409 | CDS  |
| hsa-miR-4649-5p  | NM_001302504 | NLRC4 | 0.000603841 | 5UTR |
| hsa-miR-4650-5p  | NM_001302504 | NLRC4 | 0.005053003 | CDS  |
| hsa-miR-4650-5p  | NM_001302504 | NLRC4 | 0.002434622 | CDS  |
| hsa-miR-4651     | NM_001302504 | NLRC4 | 0.005846554 | 5UTR |
| hsa-miR-4652-5p  | NM_001302504 | NLRC4 | 0.005581299 | CDS  |
| hsa-miR-4653-5p  | NM_001302504 | NLRC4 | 0.08763861  | CDS  |
| hsa-miR-4654     | NM_001302504 | NLRC4 | 0.000248928 | CDS  |
| hsa-miR-4654     | NM_001302504 | NLRC4 | 0.001076718 | CDS  |
| hsa-miR-4655-5p  | NM_001302504 | NLRC4 | 2.36E-05    | 5UTR |
| hsa-miR-4655-5p  | NM_001302504 | NLRC4 | 1.92E-06    | CDS  |
| hsa-miR-4655-3p  | NM_001302504 | NLRC4 | 4.54E-05    | CDS  |
| hsa-miR-4656     | NM_001302504 | NLRC4 | 0.01566157  | CDS  |
| hsa-miR-4657     | NM_001302504 | NLRC4 | 0.001202517 | 5UTR |
| hsa-miR-4657     | NM_001302504 | NLRC4 | 0.000502803 | CDS  |
| hsa-miR-4658     | NM_001302504 | NLRC4 | 0.004089574 | 5UTR |
| hsa-miR-4658     | NM_001302504 | NLRC4 | 0.001399021 | CDS  |
| hsa-miR-4660     | NM_001302504 | NLRC4 | 1.14E-07    | CDS  |
| hsa-miR-4661-3p  | NM_001302504 | NLRC4 | 0.000136395 | 5UTR |
| hsa-miR-4662a-5p | NM_001302504 | NLRC4 | 0.02013325  | 5UTR |
| hsa-miR-4663     | NM_001302504 | NLRC4 | 2.13E-05    | CDS  |
| hsa-miR-4663     | NM_001302504 | NLRC4 | 7.49E-05    | CDS  |
| hsa-miR-4664-5p  | NM_001302504 | NLRC4 | 7.59E-05    | CDS  |

|                 |              |       |             |      |
|-----------------|--------------|-------|-------------|------|
| hsa-miR-4664-3p | NM_001302504 | NLRC4 | 0.000290042 | 5UTR |
| hsa-miR-4664-3p | NM_001302504 | NLRC4 | 1.21E-05    | CDS  |
| hsa-miR-4665-5p | NM_001302504 | NLRC4 | 2.97E-05    | 5UTR |
| hsa-miR-4665-3p | NM_001302504 | NLRC4 | 2.10E-05    | 5UTR |
| hsa-miR-4667-5p | NM_001302504 | NLRC4 | 0.000109036 | CDS  |
| hsa-miR-4667-5p | NM_001302504 | NLRC4 | 0.008859692 | CDS  |
| hsa-miR-4667-3p | NM_001302504 | NLRC4 | 0.02569602  | 5UTR |
| hsa-miR-219b-3p | NM_001302504 | NLRC4 | 6.94E-05    | CDS  |
| hsa-miR-4669    | NM_001302504 | NLRC4 | 0.000486016 | CDS  |
| hsa-miR-4670-5p | NM_001302504 | NLRC4 | 0.000226534 | CDS  |
| hsa-miR-4671-5p | NM_001302504 | NLRC4 | 0.009164864 | CDS  |
| hsa-miR-4672    | NM_001302504 | NLRC4 | 0.003203264 | CDS  |
| hsa-miR-4673    | NM_001302504 | NLRC4 | 0.000952318 | CDS  |
| hsa-miR-4673    | NM_001302504 | NLRC4 | 0.00075673  | 5UTR |
| hsa-miR-4674    | NM_001302504 | NLRC4 | 0.003230363 | 5UTR |
| hsa-miR-4674    | NM_001302504 | NLRC4 | 5.14E-05    | CDS  |
| hsa-miR-4674    | NM_001302504 | NLRC4 | 0.02599771  | CDS  |
| hsa-miR-4675    | NM_001302504 | NLRC4 | 7.24E-05    | CDS  |
| hsa-miR-4676-5p | NM_001302504 | NLRC4 | 0.004365555 | CDS  |
| hsa-miR-4676-3p | NM_001302504 | NLRC4 | 3.07E-05    | CDS  |
| hsa-miR-4677-5p | NM_001302504 | NLRC4 | 0.003518183 | CDS  |
| hsa-miR-4681    | NM_001302504 | NLRC4 | 0.001742576 | CDS  |
| hsa-miR-4682    | NM_001302504 | NLRC4 | 0.000808708 | CDS  |
| hsa-miR-4683    | NM_001302504 | NLRC4 | 0.000749413 | CDS  |
| hsa-miR-4683    | NM_001302504 | NLRC4 | 7.42E-05    | CDS  |
| hsa-miR-4684-5p | NM_001302504 | NLRC4 | 3.07E-05    | CDS  |
| hsa-miR-4684-3p | NM_001302504 | NLRC4 | 0.000502803 | CDS  |
| hsa-miR-4685-5p | NM_001302504 | NLRC4 | 6.23E-05    | 5UTR |
| hsa-miR-4685-5p | NM_001302504 | NLRC4 | 3.70E-07    | CDS  |
| hsa-miR-4685-3p | NM_001302504 | NLRC4 | 0.000719145 | CDS  |
| hsa-miR-4685-3p | NM_001302504 | NLRC4 | 0.000140506 | CDS  |
| hsa-miR-4686    | NM_001302504 | NLRC4 | 0.007958347 | CDS  |
| hsa-miR-4687-5p | NM_001302504 | NLRC4 | 0.000170659 | CDS  |
| hsa-miR-4687-3p | NM_001302504 | NLRC4 | 0.008691157 | 5UTR |
| hsa-miR-4687-3p | NM_001302504 | NLRC4 | 0.005805567 | CDS  |
| hsa-miR-1343-5p | NM_001302504 | NLRC4 | 9.24E-06    | CDS  |
| hsa-miR-1343-5p | NM_001302504 | NLRC4 | 3.28E-05    | 5UTR |
| hsa-miR-1343-3p | NM_001302504 | NLRC4 | 0.000244245 | CDS  |
| hsa-miR-1343-3p | NM_001302504 | NLRC4 | 2.10E-05    | 5UTR |
| hsa-miR-4688    | NM_001302504 | NLRC4 | 0.000166471 | 5UTR |
| hsa-miR-4690-5p | NM_001302504 | NLRC4 | 0.001742576 | CDS  |
| hsa-miR-4690-5p | NM_001302504 | NLRC4 | 0.004040886 | 5UTR |
| hsa-miR-4690-5p | NM_001302504 | NLRC4 | 0.000605168 | CDS  |
| hsa-miR-4690-3p | NM_001302504 | NLRC4 | 6.18E-05    | CDS  |



|                 |              |       |             |      |
|-----------------|--------------|-------|-------------|------|
| hsa-miR-4690-3p | NM_001302504 | NLRC4 | 0.000167343 | CDS  |
| hsa-miR-4690-3p | NM_001302504 | NLRC4 | 0.000271192 | CDS  |
| hsa-miR-4691-5p | NM_001302504 | NLRC4 | 0.008049726 | CDS  |
| hsa-miR-4691-3p | NM_001302504 | NLRC4 | 0.00021044  | 5UTR |
| hsa-miR-4692    | NM_001302504 | NLRC4 | 0.01420162  | CDS  |
| hsa-miR-4695-5p | NM_001302504 | NLRC4 | 0.001404358 | 5UTR |
| hsa-miR-4695-3p | NM_001302504 | NLRC4 | 0.002434622 | CDS  |
| hsa-miR-4697-5p | NM_001302504 | NLRC4 | 0.008644879 | 5UTR |
| hsa-miR-4700-3p | NM_001302504 | NLRC4 | 0.001033441 | CDS  |
| hsa-miR-4701-3p | NM_001302504 | NLRC4 | 0.006212097 | 5UTR |
| hsa-miR-4707-5p | NM_001302504 | NLRC4 | 1.98E-07    | CDS  |
| hsa-miR-4707-5p | NM_001302504 | NLRC4 | 0.005039915 | 5UTR |
| hsa-miR-4708-5p | NM_001302504 | NLRC4 | 0.000749413 | CDS  |
| hsa-miR-4708-3p | NM_001302504 | NLRC4 | 6.71E-05    | 5UTR |
| hsa-miR-4709-3p | NM_001302504 | NLRC4 | 0.00754541  | CDS  |
| hsa-miR-4710    | NM_001302504 | NLRC4 | 9.29E-05    | CDS  |
| hsa-miR-4710    | NM_001302504 | NLRC4 | 0.005727952 | 5UTR |
| hsa-miR-4712-5p | NM_001302504 | NLRC4 | 0.004618597 | 5UTR |
| hsa-miR-4713-3p | NM_001302504 | NLRC4 | 0.000274924 | CDS  |
| hsa-miR-4714-5p | NM_001302504 | NLRC4 | 3.09E-05    | CDS  |
| hsa-miR-4714-3p | NM_001302504 | NLRC4 | 6.18E-05    | CDS  |
| hsa-miR-4714-3p | NM_001302504 | NLRC4 | 0.000271192 | CDS  |
| hsa-miR-4715-3p | NM_001302504 | NLRC4 | 7.82E-05    | CDS  |
| hsa-miR-4715-3p | NM_001302504 | NLRC4 | 0.000196593 | CDS  |
| hsa-miR-4715-3p | NM_001302504 | NLRC4 | 0.000487376 | CDS  |
| hsa-miR-4716-3p | NM_001302504 | NLRC4 | 0.005727952 | 5UTR |
| hsa-miR-4717-5p | NM_001302504 | NLRC4 | 6.99E-05    | CDS  |
| hsa-miR-4718    | NM_001302504 | NLRC4 | 0.008942302 | 5UTR |
| hsa-miR-4721    | NM_001302504 | NLRC4 | 0.002007726 | 5UTR |
| hsa-miR-4721    | NM_001302504 | NLRC4 | 4.02E-07    | CDS  |
| hsa-miR-4721    | NM_001302504 | NLRC4 | 0.001764953 | 5UTR |
| hsa-miR-4722-5p | NM_001302504 | NLRC4 | 0.004040886 | 5UTR |
| hsa-miR-4722-5p | NM_001302504 | NLRC4 | 5.14E-05    | CDS  |
| hsa-miR-4722-3p | NM_001302504 | NLRC4 | 7.91E-05    | CDS  |
| hsa-miR-4722-3p | NM_001302504 | NLRC4 | 0.000653259 | CDS  |
| hsa-miR-4723-5p | NM_001302504 | NLRC4 | 0.007968493 | CDS  |
| hsa-miR-4723-3p | NM_001302504 | NLRC4 | 0.000225565 | CDS  |
| hsa-miR-4724-3p | NM_001302504 | NLRC4 | 0.07198429  | CDS  |
| hsa-miR-4725-5p | NM_001302504 | NLRC4 | 0.02225154  | 5UTR |
| hsa-miR-4725-5p | NM_001302504 | NLRC4 | 0.00199289  | CDS  |
| hsa-miR-4726-5p | NM_001302504 | NLRC4 | 8.08E-05    | 5UTR |
| hsa-miR-4726-5p | NM_001302504 | NLRC4 | 0.000167343 | CDS  |
| hsa-miR-4726-3p | NM_001302504 | NLRC4 | 0.000166253 | CDS  |
| hsa-miR-4726-3p | NM_001302504 | NLRC4 | 0.000271192 | CDS  |

|                 |              |       |             |      |
|-----------------|--------------|-------|-------------|------|
| hsa-miR-4728-5p | NM_001302504 | NLRC4 | 0.003007178 | 5UTR |
| hsa-miR-4728-5p | NM_001302504 | NLRC4 | 0.007500403 | CDS  |
| hsa-miR-4730    | NM_001302504 | NLRC4 | 0.002648495 | CDS  |
| hsa-miR-4731-3p | NM_001302504 | NLRC4 | 0.04467349  | CDS  |
| hsa-miR-4732-5p | NM_001302504 | NLRC4 | 0.000502803 | CDS  |
| hsa-miR-4732-3p | NM_001302504 | NLRC4 | 0.000166253 | CDS  |
| hsa-miR-4732-3p | NM_001302504 | NLRC4 | 0.02225154  | 5UTR |
| hsa-miR-4733-3p | NM_001302504 | NLRC4 | 0.000137166 | CDS  |
| hsa-miR-4733-3p | NM_001302504 | NLRC4 | 2.23E-07    | CDS  |
| hsa-miR-4734    | NM_001302504 | NLRC4 | 2.27E-06    | CDS  |
| hsa-miR-4736    | NM_001302504 | NLRC4 | 0.008691157 | 5UTR |
| hsa-miR-4736    | NM_001302504 | NLRC4 | 4.05E-05    | CDS  |
| hsa-miR-4736    | NM_001302504 | NLRC4 | 0.000503032 | CDS  |
| hsa-miR-4737    | NM_001302504 | NLRC4 | 0.002653874 | CDS  |
| hsa-miR-3064-5p | NM_001302504 | NLRC4 | 5.14E-05    | CDS  |
| hsa-miR-4739    | NM_001302504 | NLRC4 | 0.004928285 | CDS  |
| hsa-miR-4739    | NM_001302504 | NLRC4 | 0.004462303 | CDS  |
| hsa-miR-4740-5p | NM_001302504 | NLRC4 | 0.003328804 | 5UTR |
| hsa-miR-4740-3p | NM_001302504 | NLRC4 | 0.00013388  | CDS  |
| hsa-miR-4741    | NM_001302504 | NLRC4 | 3.28E-05    | 5UTR |
| hsa-miR-4741    | NM_001302504 | NLRC4 | 6.99E-05    | CDS  |
| hsa-miR-4743-5p | NM_001302504 | NLRC4 | 0.000603841 | 5UTR |
| hsa-miR-4743-5p | NM_001302504 | NLRC4 | 0.02183851  | CDS  |
| hsa-miR-4743-3p | NM_001302504 | NLRC4 | 0.05390132  | CDS  |
| hsa-miR-122b-3p | NM_001302504 | NLRC4 | 0.000280807 | 5UTR |
| hsa-miR-4745-3p | NM_001302504 | NLRC4 | 0.002426029 | CDS  |
| hsa-miR-4746-5p | NM_001302504 | NLRC4 | 9.79E-05    | 5UTR |
| hsa-miR-4746-5p | NM_001302504 | NLRC4 | 1.02E-07    | CDS  |
| hsa-miR-4746-3p | NM_001302504 | NLRC4 | 7.45E-06    | CDS  |
| hsa-miR-4747-5p | NM_001302504 | NLRC4 | 0.000828901 | 5UTR |
| hsa-miR-4747-5p | NM_001302504 | NLRC4 | 0.00303577  | CDS  |
| hsa-miR-4747-3p | NM_001302504 | NLRC4 | 3.70E-05    | CDS  |
| hsa-miR-4749-5p | NM_001302504 | NLRC4 | 5.44E-05    | 5UTR |
| hsa-miR-4749-5p | NM_001302504 | NLRC4 | 8.91E-06    | CDS  |
| hsa-miR-4750-3p | NM_001302504 | NLRC4 | 7.91E-05    | CDS  |
| hsa-miR-4751    | NM_001302504 | NLRC4 | 0.000521544 | CDS  |
| hsa-miR-4751    | NM_001302504 | NLRC4 | 0.03761182  | CDS  |
| hsa-miR-4754    | NM_001302504 | NLRC4 | 0.000502803 | CDS  |
| hsa-miR-4754    | NM_001302504 | NLRC4 | 0.003605776 | 5UTR |
| hsa-miR-4755-5p | NM_001302504 | NLRC4 | 0.000104482 | CDS  |
| hsa-miR-499b-5p | NM_001302504 | NLRC4 | 0.003593264 | CDS  |
| hsa-miR-499b-3p | NM_001302504 | NLRC4 | 0.006950725 | CDS  |
| hsa-miR-4757-5p | NM_001302504 | NLRC4 | 0.002426029 | CDS  |
| hsa-miR-4757-5p | NM_001302504 | NLRC4 | 7.09E-05    | 5UTR |

|                  |              |       |             |      |
|------------------|--------------|-------|-------------|------|
| hsa-miR-4757-3p  | NM_001302504 | NLRC4 | 0.05756387  | CDS  |
| hsa-miR-4758-5p  | NM_001302504 | NLRC4 | 0.002744245 | 5UTR |
| hsa-miR-4758-5p  | NM_001302504 | NLRC4 | 1.39E-05    | CDS  |
| hsa-miR-4758-5p  | NM_001302504 | NLRC4 | 0.003661642 | CDS  |
| hsa-miR-4758-3p  | NM_001302504 | NLRC4 | 6.41E-06    | CDS  |
| hsa-miR-4761-3p  | NM_001302504 | NLRC4 | 0.002744589 | CDS  |
| hsa-miR-4761-3p  | NM_001302504 | NLRC4 | 5.60E-05    | CDS  |
| hsa-miR-4761-3p  | NM_001302504 | NLRC4 | 0.000484016 | CDS  |
| hsa-miR-4763-5p  | NM_001302504 | NLRC4 | 0.000167343 | CDS  |
| hsa-miR-4763-3p  | NM_001302504 | NLRC4 | 0.00092503  | CDS  |
| hsa-miR-4763-3p  | NM_001302504 | NLRC4 | 0.03853794  | 5UTR |
| hsa-miR-4763-3p  | NM_001302504 | NLRC4 | 0.003822677 | 5UTR |
| hsa-miR-4767     | NM_001302504 | NLRC4 | 0.001033441 | CDS  |
| hsa-miR-4767     | NM_001302504 | NLRC4 | 6.41E-06    | CDS  |
| hsa-miR-4768-5p  | NM_001302504 | NLRC4 | 0.03262098  | 5UTR |
| hsa-miR-4768-5p  | NM_001302504 | NLRC4 | 0.01262891  | CDS  |
| hsa-miR-4769-5p  | NM_001302504 | NLRC4 | 0.007500403 | CDS  |
| hsa-miR-4772-3p  | NM_001302504 | NLRC4 | 7.91E-05    | CDS  |
| hsa-miR-4776-3p  | NM_001302504 | NLRC4 | 1.35E-05    | CDS  |
| hsa-miR-4776-3p  | NM_001302504 | NLRC4 | 0.000285506 | 5UTR |
| hsa-miR-4780     | NM_001302504 | NLRC4 | 0.02225154  | 5UTR |
| hsa-miR-4436b-5p | NM_001302504 | NLRC4 | 1.05E-05    | 5UTR |
| hsa-miR-4436b-3p | NM_001302504 | NLRC4 | 6.00E-06    | CDS  |
| hsa-miR-4781-5p  | NM_001302504 | NLRC4 | 0.003719112 | 5UTR |
| hsa-miR-4781-5p  | NM_001302504 | NLRC4 | 5.44E-05    | 5UTR |
| hsa-miR-4783-5p  | NM_001302504 | NLRC4 | 1.39E-05    | CDS  |
| hsa-miR-4783-3p  | NM_001302504 | NLRC4 | 2.82E-07    | CDS  |
| hsa-miR-4783-3p  | NM_001302504 | NLRC4 | 7.09E-05    | 5UTR |
| hsa-miR-4784     | NM_001302504 | NLRC4 | 0.00085614  | CDS  |
| hsa-miR-4785     | NM_001302504 | NLRC4 | 0.000262096 | 5UTR |
| hsa-miR-1245b-5p | NM_001302504 | NLRC4 | 0.004854961 | CDS  |
| hsa-miR-2467-5p  | NM_001302504 | NLRC4 | 0.000294775 | CDS  |
| hsa-miR-2467-5p  | NM_001302504 | NLRC4 | 0.003503197 | CDS  |
| hsa-miR-2467-3p  | NM_001302504 | NLRC4 | 0.000605168 | CDS  |
| hsa-miR-2467-3p  | NM_001302504 | NLRC4 | 0.008644879 | 5UTR |
| hsa-miR-4786-5p  | NM_001302504 | NLRC4 | 0.009164864 | CDS  |
| hsa-miR-4786-3p  | NM_001302504 | NLRC4 | 0.001687649 | 5UTR |
| hsa-miR-4787-5p  | NM_001302504 | NLRC4 | 1.92E-06    | CDS  |
| hsa-miR-4787-3p  | NM_001302504 | NLRC4 | 0.000167343 | CDS  |
| hsa-miR-4787-3p  | NM_001302504 | NLRC4 | 0.002837809 | CDS  |
| hsa-miR-4788     | NM_001302504 | NLRC4 | 0.000952318 | CDS  |
| hsa-miR-4793-5p  | NM_001302504 | NLRC4 | 3.57E-05    | CDS  |
| hsa-miR-4793-3p  | NM_001302504 | NLRC4 | 0.05185139  | CDS  |
| hsa-miR-4797-3p  | NM_001302504 | NLRC4 | 0.008779417 | 5UTR |

|                  |              |       |             |      |
|------------------|--------------|-------|-------------|------|
| hsa-miR-4799-3p  | NM_001302504 | NLRC4 | 2.13E-05    | CDS  |
| hsa-miR-4800-3p  | NM_001302504 | NLRC4 | 0.002274012 | CDS  |
| hsa-miR-4999-5p  | NM_001302504 | NLRC4 | 6.94E-05    | CDS  |
| hsa-miR-4999-5p  | NM_001302504 | NLRC4 | 0.03853267  | CDS  |
| hsa-miR-5000-3p  | NM_001302504 | NLRC4 | 2.73E-06    | CDS  |
| hsa-miR-5001-5p  | NM_001302504 | NLRC4 | 7.24E-05    | CDS  |
| hsa-miR-5002-5p  | NM_001302504 | NLRC4 | 0.07597251  | CDS  |
| hsa-miR-5003-3p  | NM_001302504 | NLRC4 | 0.004422789 | CDS  |
| hsa-miR-5003-3p  | NM_001302504 | NLRC4 | 0.000228018 | CDS  |
| hsa-miR-5004-5p  | NM_001302504 | NLRC4 | 0.0195374   | 5UTR |
| hsa-miR-5004-3p  | NM_001302504 | NLRC4 | 0.08903252  | CDS  |
| hsa-miR-5006-5p  | NM_001302504 | NLRC4 | 2.23E-07    | CDS  |
| hsa-miR-5006-3p  | NM_001302504 | NLRC4 | 0.000719145 | CDS  |
| hsa-miR-5006-3p  | NM_001302504 | NLRC4 | 0.000143515 | CDS  |
| hsa-miR-5008-3p  | NM_001302504 | NLRC4 | 0.01135416  | 5UTR |
| hsa-miR-5008-3p  | NM_001302504 | NLRC4 | 4.54E-05    | CDS  |
| hsa-miR-5010-5p  | NM_001302504 | NLRC4 | 0.001026694 | 5UTR |
| hsa-miR-5010-3p  | NM_001302504 | NLRC4 | 0.002969932 | CDS  |
| hsa-miR-5087     | NM_001302504 | NLRC4 | 0.000104007 | CDS  |
| hsa-miR-5088-5p  | NM_001302504 | NLRC4 | 0.003639629 | 5UTR |
| hsa-miR-5088-5p  | NM_001302504 | NLRC4 | 0.007482492 | CDS  |
| hsa-miR-5088-5p  | NM_001302504 | NLRC4 | 0.000707503 | CDS  |
| hsa-miR-5089-5p  | NM_001302504 | NLRC4 | 0.01718499  | CDS  |
| hsa-miR-5089-3p  | NM_001302504 | NLRC4 | 0.05235348  | 5UTR |
| hsa-miR-5090     | NM_001302504 | NLRC4 | 1.92E-06    | CDS  |
| hsa-miR-5091     | NM_001302504 | NLRC4 | 0.002114959 | CDS  |
| hsa-miR-5092     | NM_001302504 | NLRC4 | 0.000140506 | CDS  |
| hsa-miR-5092     | NM_001302504 | NLRC4 | 6.18E-05    | CDS  |
| hsa-miR-5093     | NM_001302504 | NLRC4 | 0.03155469  | CDS  |
| hsa-miR-5187-3p  | NM_001302504 | NLRC4 | 0.001427119 | CDS  |
| hsa-miR-5189-5p  | NM_001302504 | NLRC4 | 0.004956985 | 5UTR |
| hsa-miR-5189-5p  | NM_001302504 | NLRC4 | 0.08763861  | CDS  |
| hsa-miR-5190     | NM_001302504 | NLRC4 | 0.003518762 | CDS  |
| hsa-miR-5192     | NM_001302504 | NLRC4 | 0.006884177 | CDS  |
| hsa-miR-5192     | NM_001302504 | NLRC4 | 0.000577177 | 5UTR |
| hsa-miR-5193     | NM_001302504 | NLRC4 | 0.000244245 | CDS  |
| hsa-miR-5193     | NM_001302504 | NLRC4 | 0.02225154  | 5UTR |
| hsa-miR-5194     | NM_001302504 | NLRC4 | 0.007968493 | CDS  |
| hsa-miR-5195-3p  | NM_001302504 | NLRC4 | 0.003860477 | CDS  |
| hsa-miR-5196-5p  | NM_001302504 | NLRC4 | 0.005727952 | 5UTR |
| hsa-miR-4524b-3p | NM_001302504 | NLRC4 | 0.001742576 | CDS  |
| hsa-miR-5100     | NM_001302504 | NLRC4 | 0.000604901 | 5UTR |
| hsa-miR-5100     | NM_001302504 | NLRC4 | 0.007176909 | 5UTR |
| hsa-miR-5572     | NM_001302504 | NLRC4 | 0.001387149 | CDS  |

|                  |              |       |             |      |
|------------------|--------------|-------|-------------|------|
| hsa-miR-5572     | NM_001302504 | NLRC4 | 0.000107468 | CDS  |
| hsa-miR-664b-5p  | NM_001302504 | NLRC4 | 0.006459822 | CDS  |
| hsa-miR-664b-5p  | NM_001302504 | NLRC4 | 0.003007178 | 5UTR |
| hsa-miR-664b-3p  | NM_001302504 | NLRC4 | 0.001002627 | CDS  |
| hsa-miR-5580-3p  | NM_001302504 | NLRC4 | 0.000161927 | CDS  |
| hsa-miR-5581-5p  | NM_001302504 | NLRC4 | 0.002758134 | 5UTR |
| hsa-miR-5584-5p  | NM_001302504 | NLRC4 | 0.008674456 | 5UTR |
| hsa-miR-5584-3p  | NM_001302504 | NLRC4 | 0.000255514 | CDS  |
| hsa-miR-5584-3p  | NM_001302504 | NLRC4 | 0.04801035  | 5UTR |
| hsa-miR-5587-5p  | NM_001302504 | NLRC4 | 2.45E-05    | 5UTR |
| hsa-miR-5587-5p  | NM_001302504 | NLRC4 | 2.42E-06    | CDS  |
| hsa-miR-5587-3p  | NM_001302504 | NLRC4 | 1.98E-07    | CDS  |
| hsa-miR-548au-3p | NM_001302504 | NLRC4 | 0.001495227 | CDS  |
| hsa-miR-548au-3p | NM_001302504 | NLRC4 | 7.72E-06    | CDS  |
| hsa-miR-1295b-5p | NM_001302504 | NLRC4 | 0.001389353 | CDS  |
| hsa-miR-1295b-5p | NM_001302504 | NLRC4 | 0.000161927 | CDS  |
| hsa-miR-1295b-3p | NM_001302504 | NLRC4 | 0.001742576 | CDS  |
| hsa-miR-1295b-3p | NM_001302504 | NLRC4 | 0.004040886 | 5UTR |
| hsa-miR-5588-5p  | NM_001302504 | NLRC4 | 0.00085614  | CDS  |
| hsa-miR-5588-5p  | NM_001302504 | NLRC4 | 8.77E-05    | CDS  |
| hsa-miR-5589-3p  | NM_001302504 | NLRC4 | 0.000196593 | CDS  |
| hsa-miR-5589-3p  | NM_001302504 | NLRC4 | 0.03853794  | 5UTR |
| hsa-miR-5591-3p  | NM_001302504 | NLRC4 | 0.000108131 | CDS  |
| hsa-miR-5680     | NM_001302504 | NLRC4 | 0.002020599 | CDS  |
| hsa-miR-5681a    | NM_001302504 | NLRC4 | 9.02E-05    | CDS  |
| hsa-miR-5682     | NM_001302504 | NLRC4 | 0.000537979 | CDS  |
| hsa-miR-5685     | NM_001302504 | NLRC4 | 1.14E-07    | CDS  |
| hsa-miR-5692c    | NM_001302504 | NLRC4 | 0.004618597 | 5UTR |
| hsa-miR-5687     | NM_001302504 | NLRC4 | 0.01339061  | CDS  |
| hsa-miR-5681b    | NM_001302504 | NLRC4 | 0.000238043 | CDS  |
| hsa-miR-5689     | NM_001302504 | NLRC4 | 0.04304292  | 5UTR |
| hsa-miR-5693     | NM_001302504 | NLRC4 | 6.47E-06    | CDS  |
| hsa-miR-5698     | NM_001302504 | NLRC4 | 9.02E-05    | CDS  |
| hsa-miR-5699-5p  | NM_001302504 | NLRC4 | 0.000196593 | CDS  |
| hsa-miR-5699-3p  | NM_001302504 | NLRC4 | 0.000244245 | CDS  |
| hsa-miR-5699-3p  | NM_001302504 | NLRC4 | 0.000721914 | CDS  |
| hsa-miR-5705     | NM_001302504 | NLRC4 | 0.01310449  | CDS  |
| hsa-miR-5706     | NM_001302504 | NLRC4 | 0.02787945  | CDS  |
| hsa-miR-5787     | NM_001302504 | NLRC4 | 0.005727952 | 5UTR |
| hsa-miR-1199-5p  | NM_001302504 | NLRC4 | 9.79E-05    | 5UTR |
| hsa-miR-1199-3p  | NM_001302504 | NLRC4 | 6.41E-06    | CDS  |
| hsa-miR-1199-3p  | NM_001302504 | NLRC4 | 0.002536929 | CDS  |
| hsa-miR-6068     | NM_001302504 | NLRC4 | 0.003518183 | CDS  |
| hsa-miR-6069     | NM_001302504 | NLRC4 | 0.000294775 | CDS  |

|                  |              |       |             |      |
|------------------|--------------|-------|-------------|------|
| hsa-miR-6069     | NM_001302504 | NLRC4 | 7.45E-06    | CDS  |
| hsa-miR-6070     | NM_001302504 | NLRC4 | 0.00021044  | 5UTR |
| hsa-miR-6070     | NM_001302504 | NLRC4 | 2.42E-06    | CDS  |
| hsa-miR-6075     | NM_001302504 | NLRC4 | 1.14E-07    | CDS  |
| hsa-miR-6077     | NM_001302504 | NLRC4 | 0.001473618 | 5UTR |
| hsa-miR-6078     | NM_001302504 | NLRC4 | 0.000582754 | CDS  |
| hsa-miR-6078     | NM_001302504 | NLRC4 | 0.000140506 | CDS  |
| hsa-miR-6080     | NM_001302504 | NLRC4 | 0.003505388 | CDS  |
| hsa-miR-6084     | NM_001302504 | NLRC4 | 0.000721914 | CDS  |
| hsa-miR-6085     | NM_001302504 | NLRC4 | 0.004916043 | 5UTR |
| hsa-miR-6086     | NM_001302504 | NLRC4 | 0.0195374   | 5UTR |
| hsa-miR-6086     | NM_001302504 | NLRC4 | 0.00953199  | CDS  |
| hsa-miR-6089     | NM_001302504 | NLRC4 | 0.005727952 | 5UTR |
| hsa-miR-6090     | NM_001302504 | NLRC4 | 2.97E-05    | 5UTR |
| hsa-miR-6090     | NM_001302504 | NLRC4 | 0.005727952 | 5UTR |
| hsa-miR-6090     | NM_001302504 | NLRC4 | 0.000605168 | CDS  |
| hsa-miR-6127     | NM_001302504 | NLRC4 | 0.007968493 | CDS  |
| hsa-miR-6131     | NM_001302504 | NLRC4 | 0.008691157 | 5UTR |
| hsa-miR-6131     | NM_001302504 | NLRC4 | 0.04340877  | CDS  |
| hsa-miR-6132     | NM_001302504 | NLRC4 | 0.004040886 | 5UTR |
| hsa-miR-6132     | NM_001302504 | NLRC4 | 0.001742576 | CDS  |
| hsa-miR-6133     | NM_001302504 | NLRC4 | 0.007968493 | CDS  |
| hsa-miR-6134     | NM_001302504 | NLRC4 | 0.006459822 | CDS  |
| hsa-miR-6134     | NM_001302504 | NLRC4 | 0.002533273 | CDS  |
| hsa-miR-6165     | NM_001302504 | NLRC4 | 0.004774802 | CDS  |
| hsa-miR-6165     | NM_001302504 | NLRC4 | 0.004002253 | 5UTR |
| hsa-miR-6499-3p  | NM_001302504 | NLRC4 | 7.45E-06    | CDS  |
| hsa-miR-6500-5p  | NM_001302504 | NLRC4 | 0.007356013 | CDS  |
| hsa-miR-6501-5p  | NM_001302504 | NLRC4 | 2.27E-06    | CDS  |
| hsa-miR-6503-5p  | NM_001302504 | NLRC4 | 0.002426029 | CDS  |
| hsa-miR-6503-3p  | NM_001302504 | NLRC4 | 0.01408661  | CDS  |
| hsa-miR-6505-5p  | NM_001302504 | NLRC4 | 0.000601154 | CDS  |
| hsa-miR-6505-3p  | NM_001302504 | NLRC4 | 0.00085614  | CDS  |
| hsa-miR-6506-5p  | NM_001302504 | NLRC4 | 0.000109036 | CDS  |
| hsa-miR-6506-3p  | NM_001302504 | NLRC4 | 0.009344737 | CDS  |
| hsa-miR-6507-3p  | NM_001302504 | NLRC4 | 0.002052023 | CDS  |
| hsa-miR-6509-3p  | NM_001302504 | NLRC4 | 1.34E-05    | 5UTR |
| hsa-miR-6510-5p  | NM_001302504 | NLRC4 | 0.004774802 | CDS  |
| hsa-miR-6510-5p  | NM_001302504 | NLRC4 | 0.004002253 | 5UTR |
| hsa-miR-6511a-5p | NM_001302504 | NLRC4 | 0.004487638 | CDS  |
| hsa-miR-6511a-5p | NM_001302504 | NLRC4 | 0.000230589 | CDS  |
| hsa-miR-6512-5p  | NM_001302504 | NLRC4 | 0.005857131 | CDS  |
| hsa-miR-6512-3p  | NM_001302504 | NLRC4 | 0.000123249 | CDS  |
| hsa-miR-6513-5p  | NM_001302504 | NLRC4 | 0.000592353 | CDS  |

|                  |              |       |             |      |
|------------------|--------------|-------|-------------|------|
| hsa-miR-6514-5p  | NM_001302504 | NLRC4 | 0.001026694 | 5UTR |
| hsa-miR-6514-3p  | NM_001302504 | NLRC4 | 7.91E-05    | CDS  |
| hsa-miR-6515-3p  | NM_001302504 | NLRC4 | 0.05096433  | 5UTR |
| hsa-miR-6716-5p  | NM_001302504 | NLRC4 | 0.006212097 | 5UTR |
| hsa-miR-6716-5p  | NM_001302504 | NLRC4 | 0.001028636 | CDS  |
| hsa-miR-6717-5p  | NM_001302504 | NLRC4 | 0.000427409 | CDS  |
| hsa-miR-6511b-5p | NM_001302504 | NLRC4 | 0.000502803 | CDS  |
| hsa-miR-6511b-3p | NM_001302504 | NLRC4 | 0.000140506 | CDS  |
| hsa-miR-6718-5p  | NM_001302504 | NLRC4 | 0.03090052  | CDS  |
| hsa-miR-6720-5p  | NM_001302504 | NLRC4 | 4.02E-07    | CDS  |
| hsa-miR-6721-5p  | NM_001302504 | NLRC4 | 0.003007178 | 5UTR |
| hsa-miR-6721-5p  | NM_001302504 | NLRC4 | 2.31E-05    | 5UTR |
| hsa-miR-6722-3p  | NM_001302504 | NLRC4 | 5.03E-05    | 5UTR |
| hsa-miR-6722-3p  | NM_001302504 | NLRC4 | 0.006363825 | 5UTR |
| hsa-miR-6724-5p  | NM_001302504 | NLRC4 | 6.00E-05    | CDS  |
| hsa-miR-892c-3p  | NM_001302504 | NLRC4 | 0.000120074 | CDS  |
| hsa-miR-6726-5p  | NM_001302504 | NLRC4 | 0.006212097 | 5UTR |
| hsa-miR-6726-5p  | NM_001302504 | NLRC4 | 0.005421949 | CDS  |
| hsa-miR-6726-5p  | NM_001302504 | NLRC4 | 0.01408661  | CDS  |
| hsa-miR-6726-3p  | NM_001302504 | NLRC4 | 0.000186    | CDS  |
| hsa-miR-6727-5p  | NM_001302504 | NLRC4 | 3.70E-07    | CDS  |
| hsa-miR-6727-5p  | NM_001302504 | NLRC4 | 0.003272409 | 5UTR |
| hsa-miR-6727-3p  | NM_001302504 | NLRC4 | 0.000244245 | CDS  |
| hsa-miR-6728-5p  | NM_001302504 | NLRC4 | 0.000601154 | CDS  |
| hsa-miR-6728-3p  | NM_001302504 | NLRC4 | 0.000215389 | CDS  |
| hsa-miR-6729-5p  | NM_001302504 | NLRC4 | 0.003007178 | 5UTR |
| hsa-miR-6729-5p  | NM_001302504 | NLRC4 | 8.91E-06    | CDS  |
| hsa-miR-6730-5p  | NM_001302504 | NLRC4 | 0.000640331 | 5UTR |
| hsa-miR-6731-5p  | NM_001302504 | NLRC4 | 0.01236446  | 5UTR |
| hsa-miR-6731-3p  | NM_001302504 | NLRC4 | 0.000123249 | CDS  |
| hsa-miR-6732-5p  | NM_001302504 | NLRC4 | 0.001033441 | CDS  |
| hsa-miR-6732-5p  | NM_001302504 | NLRC4 | 0.002468036 | CDS  |
| hsa-miR-6732-3p  | NM_001302504 | NLRC4 | 0.01665946  | 5UTR |
| hsa-miR-6734-5p  | NM_001302504 | NLRC4 | 0.001845745 | CDS  |
| hsa-miR-6734-3p  | NM_001302504 | NLRC4 | 0.000212555 | CDS  |
| hsa-miR-6734-3p  | NM_001302504 | NLRC4 | 0.02225154  | 5UTR |
| hsa-miR-6735-5p  | NM_001302504 | NLRC4 | 0.004928285 | CDS  |
| hsa-miR-6735-5p  | NM_001302504 | NLRC4 | 0.005727952 | 5UTR |
| hsa-miR-6735-5p  | NM_001302504 | NLRC4 | 0.000605168 | CDS  |
| hsa-miR-6735-3p  | NM_001302504 | NLRC4 | 0.003593264 | CDS  |
| hsa-miR-6736-5p  | NM_001302504 | NLRC4 | 0.003230363 | 5UTR |
| hsa-miR-6736-5p  | NM_001302504 | NLRC4 | 0.001886311 | 5UTR |
| hsa-miR-6736-3p  | NM_001302504 | NLRC4 | 8.09E-06    | CDS  |
| hsa-miR-6738-5p  | NM_001302504 | NLRC4 | 0.002744245 | 5UTR |

|                 |              |       |             |      |
|-----------------|--------------|-------|-------------|------|
| hsa-miR-6738-5p | NM_001302504 | NLRC4 | 0.005727952 | 5UTR |
| hsa-miR-6738-5p | NM_001302504 | NLRC4 | 0.004487638 | CDS  |
| hsa-miR-6738-3p | NM_001302504 | NLRC4 | 3.81E-05    | CDS  |
| hsa-miR-6738-3p | NM_001302504 | NLRC4 | 0.000215389 | CDS  |
| hsa-miR-6739-3p | NM_001302504 | NLRC4 | 3.07E-05    | CDS  |
| hsa-miR-6740-5p | NM_001302504 | NLRC4 | 0.000462347 | CDS  |
| hsa-miR-6741-5p | NM_001302504 | NLRC4 | 0.001399021 | CDS  |
| hsa-miR-6742-5p | NM_001302504 | NLRC4 | 0.0353236   | CDS  |
| hsa-miR-6743-5p | NM_001302504 | NLRC4 | 0.005727952 | 5UTR |
| hsa-miR-6743-5p | NM_001302504 | NLRC4 | 0.006459822 | CDS  |
| hsa-miR-6743-5p | NM_001302504 | NLRC4 | 9.02E-05    | CDS  |
| hsa-miR-6743-3p | NM_001302504 | NLRC4 | 0.06192316  | 5UTR |
| hsa-miR-6743-3p | NM_001302504 | NLRC4 | 0.000170659 | CDS  |
| hsa-miR-6744-5p | NM_001302504 | NLRC4 | 0.000427409 | CDS  |
| hsa-miR-6746-5p | NM_001302504 | NLRC4 | 0.007500403 | CDS  |
| hsa-miR-6746-3p | NM_001302504 | NLRC4 | 7.45E-06    | CDS  |
| hsa-miR-6747-5p | NM_001302504 | NLRC4 | 0.008859692 | CDS  |
| hsa-miR-6747-3p | NM_001302504 | NLRC4 | 0.000721914 | CDS  |
| hsa-miR-6749-5p | NM_001302504 | NLRC4 | 0.005053003 | CDS  |
| hsa-miR-6749-3p | NM_001302504 | NLRC4 | 0.004422789 | CDS  |
| hsa-miR-6750-5p | NM_001302504 | NLRC4 | 6.00E-06    | CDS  |
| hsa-miR-6751-5p | NM_001302504 | NLRC4 | 0.002208302 | 5UTR |
| hsa-miR-6751-3p | NM_001302504 | NLRC4 | 0.000255514 | CDS  |
| hsa-miR-6752-5p | NM_001302504 | NLRC4 | 0.002744245 | 5UTR |
| hsa-miR-6752-3p | NM_001302504 | NLRC4 | 0.02569602  | 5UTR |
| hsa-miR-6753-5p | NM_001302504 | NLRC4 | 0.03650309  | 5UTR |
| hsa-miR-6753-5p | NM_001302504 | NLRC4 | 1.92E-06    | CDS  |
| hsa-miR-6753-3p | NM_001302504 | NLRC4 | 1.40E-05    | 5UTR |
| hsa-miR-6754-3p | NM_001302504 | NLRC4 | 0.000225565 | CDS  |
| hsa-miR-6755-5p | NM_001302504 | NLRC4 | 0.008674456 | 5UTR |
| hsa-miR-6755-5p | NM_001302504 | NLRC4 | 0.03188717  | CDS  |
| hsa-miR-6756-5p | NM_001302504 | NLRC4 | 0.004916043 | 5UTR |
| hsa-miR-6757-5p | NM_001302504 | NLRC4 | 0.008859692 | CDS  |
| hsa-miR-6757-3p | NM_001302504 | NLRC4 | 0.008942302 | 5UTR |
| hsa-miR-6757-3p | NM_001302504 | NLRC4 | 0.003444015 | CDS  |
| hsa-miR-6758-5p | NM_001302504 | NLRC4 | 0.004317436 | CDS  |
| hsa-miR-6759-5p | NM_001302504 | NLRC4 | 0.009506185 | 5UTR |
| hsa-miR-6759-3p | NM_001302504 | NLRC4 | 0.000120074 | CDS  |
| hsa-miR-6760-5p | NM_001302504 | NLRC4 | 0.06182194  | CDS  |
| hsa-miR-6760-3p | NM_001302504 | NLRC4 | 3.07E-05    | CDS  |
| hsa-miR-6761-3p | NM_001302504 | NLRC4 | 0.004577843 | CDS  |
| hsa-miR-6762-3p | NM_001302504 | NLRC4 | 5.14E-05    | CDS  |
| hsa-miR-6762-3p | NM_001302504 | NLRC4 | 3.07E-05    | CDS  |
| hsa-miR-6763-5p | NM_001302504 | NLRC4 | 0.001564227 | CDS  |



|                  |              |       |             |      |
|------------------|--------------|-------|-------------|------|
| hsa-miR-6763-3p  | NM_001302504 | NLRC4 | 0.004422789 | CDS  |
| hsa-miR-6764-5p  | NM_001302504 | NLRC4 | 2.23E-07    | CDS  |
| hsa-miR-6764-5p  | NM_001302504 | NLRC4 | 4.78E-05    | 5UTR |
| hsa-miR-6765-5p  | NM_001302504 | NLRC4 | 0.001230162 | 5UTR |
| hsa-miR-6765-3p  | NM_001302504 | NLRC4 | 0.000140506 | CDS  |
| hsa-miR-6766-5p  | NM_001302504 | NLRC4 | 0.01177394  | CDS  |
| hsa-miR-6766-5p  | NM_001302504 | NLRC4 | 0.008674456 | 5UTR |
| hsa-miR-6766-5p  | NM_001302504 | NLRC4 | 0.001473618 | 5UTR |
| hsa-miR-6767-5p  | NM_001302504 | NLRC4 | 0.000605168 | CDS  |
| hsa-miR-6767-3p  | NM_001302504 | NLRC4 | 3.57E-05    | CDS  |
| hsa-miR-6768-5p  | NM_001302504 | NLRC4 | 0.03650309  | 5UTR |
| hsa-miR-6768-3p  | NM_001302504 | NLRC4 | 0.002148664 | 5UTR |
| hsa-miR-6769a-3p | NM_001302504 | NLRC4 | 0.000211166 | CDS  |
| hsa-miR-6770-5p  | NM_001302504 | NLRC4 | 5.60E-05    | CDS  |
| hsa-miR-6770-3p  | NM_001302504 | NLRC4 | 1.35E-05    | CDS  |
| hsa-miR-6770-3p  | NM_001302504 | NLRC4 | 0.005039915 | 5UTR |
| hsa-miR-6771-5p  | NM_001302504 | NLRC4 | 0.002587252 | 5UTR |
| hsa-miR-6772-3p  | NM_001302504 | NLRC4 | 0.000386163 | CDS  |
| hsa-miR-6773-5p  | NM_001302504 | NLRC4 | 0.003230363 | 5UTR |
| hsa-miR-6774-5p  | NM_001302504 | NLRC4 | 1.62E-05    | 5UTR |
| hsa-miR-6775-5p  | NM_001302504 | NLRC4 | 0.006498872 | CDS  |
| hsa-miR-6775-5p  | NM_001302504 | NLRC4 | 0.000262096 | 5UTR |
| hsa-miR-6775-3p  | NM_001302504 | NLRC4 | 0.007176909 | 5UTR |
| hsa-miR-6776-5p  | NM_001302504 | NLRC4 | 0.000671587 | 5UTR |
| hsa-miR-6776-5p  | NM_001302504 | NLRC4 | 0.08763861  | CDS  |
| hsa-miR-6776-5p  | NM_001302504 | NLRC4 | 0.004956985 | 5UTR |
| hsa-miR-6777-5p  | NM_001302504 | NLRC4 | 0.005727952 | 5UTR |
| hsa-miR-6778-5p  | NM_001302504 | NLRC4 | 8.08E-05    | 5UTR |
| hsa-miR-6778-3p  | NM_001302504 | NLRC4 | 0.000196593 | CDS  |
| hsa-miR-6778-3p  | NM_001302504 | NLRC4 | 0.000915739 | 5UTR |
| hsa-miR-6779-5p  | NM_001302504 | NLRC4 | 0.004040886 | 5UTR |
| hsa-miR-6779-5p  | NM_001302504 | NLRC4 | 0.000977407 | CDS  |
| hsa-miR-6779-3p  | NM_001302504 | NLRC4 | 2.13E-05    | CDS  |
| hsa-miR-6780a-5p | NM_001302504 | NLRC4 | 0.000605168 | CDS  |
| hsa-miR-6780a-3p | NM_001302504 | NLRC4 | 0.000123249 | CDS  |
| hsa-miR-6781-5p  | NM_001302504 | NLRC4 | 0.005727952 | 5UTR |
| hsa-miR-6782-5p  | NM_001302504 | NLRC4 | 0.005727952 | 5UTR |
| hsa-miR-6782-5p  | NM_001302504 | NLRC4 | 2.97E-05    | 5UTR |
| hsa-miR-6782-3p  | NM_001302504 | NLRC4 | 0.000166253 | CDS  |
| hsa-miR-6782-3p  | NM_001302504 | NLRC4 | 0.000161927 | CDS  |
| hsa-miR-6782-3p  | NM_001302504 | NLRC4 | 0.000280807 | 5UTR |
| hsa-miR-6783-5p  | NM_001302504 | NLRC4 | 0.000798203 | 5UTR |
| hsa-miR-6783-3p  | NM_001302504 | NLRC4 | 0.000126832 | CDS  |
| hsa-miR-6784-5p  | NM_001302504 | NLRC4 | 0.006363825 | 5UTR |

|                 |              |       |             |      |
|-----------------|--------------|-------|-------------|------|
| hsa-miR-6784-5p | NM_001302504 | NLRC4 | 0.001763547 | CDS  |
| hsa-miR-6784-3p | NM_001302504 | NLRC4 | 0.000285506 | 5UTR |
| hsa-miR-6785-3p | NM_001302504 | NLRC4 | 3.57E-05    | CDS  |
| hsa-miR-6787-5p | NM_001302504 | NLRC4 | 0.00085614  | CDS  |
| hsa-miR-6787-5p | NM_001302504 | NLRC4 | 0.01924724  | CDS  |
| hsa-miR-6787-3p | NM_001302504 | NLRC4 | 4.59E-06    | CDS  |
| hsa-miR-6788-3p | NM_001302504 | NLRC4 | 0.000120074 | CDS  |
| hsa-miR-6789-3p | NM_001302504 | NLRC4 | 0.000427409 | CDS  |
| hsa-miR-6789-3p | NM_001302504 | NLRC4 | 8.09E-06    | CDS  |
| hsa-miR-6790-5p | NM_001302504 | NLRC4 | 0.002220645 | 5UTR |
| hsa-miR-6790-5p | NM_001302504 | NLRC4 | 0.01718499  | CDS  |
| hsa-miR-6790-5p | NM_001302504 | NLRC4 | 0.002744245 | 5UTR |
| hsa-miR-6790-3p | NM_001302504 | NLRC4 | 0.000262096 | 5UTR |
| hsa-miR-6791-5p | NM_001302504 | NLRC4 | 2.23E-07    | CDS  |
| hsa-miR-6791-5p | NM_001302504 | NLRC4 | 0.003230363 | 5UTR |
| hsa-miR-6791-5p | NM_001302504 | NLRC4 | 0.000317195 | 5UTR |
| hsa-miR-6791-3p | NM_001302504 | NLRC4 | 0.000915739 | 5UTR |
| hsa-miR-6791-3p | NM_001302504 | NLRC4 | 0.003672413 | CDS  |
| hsa-miR-6792-5p | NM_001302504 | NLRC4 | 0.002220645 | 5UTR |
| hsa-miR-6792-3p | NM_001302504 | NLRC4 | 0.004422789 | CDS  |
| hsa-miR-6792-3p | NM_001302504 | NLRC4 | 0.000225565 | CDS  |
| hsa-miR-6793-5p | NM_001302504 | NLRC4 | 0.006363825 | 5UTR |
| hsa-miR-6793-5p | NM_001302504 | NLRC4 | 0.03365704  | CDS  |
| hsa-miR-6794-5p | NM_001302504 | NLRC4 | 0.000121323 | 5UTR |
| hsa-miR-6794-5p | NM_001302504 | NLRC4 | 0.004002253 | 5UTR |
| hsa-miR-6795-5p | NM_001302504 | NLRC4 | 0.000248928 | CDS  |
| hsa-miR-6795-5p | NM_001302504 | NLRC4 | 0.001387149 | CDS  |
| hsa-miR-6796-5p | NM_001302504 | NLRC4 | 0.02261598  | CDS  |
| hsa-miR-6797-5p | NM_001302504 | NLRC4 | 0.002468036 | CDS  |
| hsa-miR-6798-5p | NM_001302504 | NLRC4 | 0.005846554 | 5UTR |
| hsa-miR-6799-5p | NM_001302504 | NLRC4 | 0.005727952 | 5UTR |
| hsa-miR-6799-5p | NM_001302504 | NLRC4 | 0.007500403 | CDS  |
| hsa-miR-6800-5p | NM_001302504 | NLRC4 | 1.39E-05    | CDS  |
| hsa-miR-6800-5p | NM_001302504 | NLRC4 | 0.002942794 | 5UTR |
| hsa-miR-6801-5p | NM_001302504 | NLRC4 | 0.000605168 | CDS  |
| hsa-miR-6801-5p | NM_001302504 | NLRC4 | 8.08E-05    | 5UTR |
| hsa-miR-6801-3p | NM_001302504 | NLRC4 | 0.000196593 | CDS  |
| hsa-miR-6802-5p | NM_001302504 | NLRC4 | 2.31E-05    | 5UTR |
| hsa-miR-6802-5p | NM_001302504 | NLRC4 | 0.07045485  | CDS  |
| hsa-miR-6802-5p | NM_001302504 | NLRC4 | 0.000419898 | 5UTR |
| hsa-miR-6802-5p | NM_001302504 | NLRC4 | 0.002389222 | CDS  |
| hsa-miR-6803-5p | NM_001302504 | NLRC4 | 0.01083776  | 5UTR |
| hsa-miR-6804-5p | NM_001302504 | NLRC4 | 0.002007726 | 5UTR |
| hsa-miR-6804-5p | NM_001302504 | NLRC4 | 5.82E-05    | CDS  |

|                 |              |       |             |      |
|-----------------|--------------|-------|-------------|------|
| hsa-miR-6804-3p | NM_001302504 | NLRC4 | 2.28E-05    | CDS  |
| hsa-miR-6805-5p | NM_001302504 | NLRC4 | 2.97E-05    | 5UTR |
| hsa-miR-6805-3p | NM_001302504 | NLRC4 | 0.04682227  | 5UTR |
| hsa-miR-6806-5p | NM_001302504 | NLRC4 | 0.006363825 | 5UTR |
| hsa-miR-6807-5p | NM_001302504 | NLRC4 | 0.001956377 | 5UTR |
| hsa-miR-6807-3p | NM_001302504 | NLRC4 | 2.28E-05    | CDS  |
| hsa-miR-6808-5p | NM_001302504 | NLRC4 | 0.000230589 | CDS  |
| hsa-miR-6808-5p | NM_001302504 | NLRC4 | 4.13E-05    | CDS  |
| hsa-miR-6808-5p | NM_001302504 | NLRC4 | 0.004040886 | 5UTR |
| hsa-miR-6808-3p | NM_001302504 | NLRC4 | 0.007026662 | CDS  |
| hsa-miR-6810-5p | NM_001302504 | NLRC4 | 0.005727952 | 5UTR |
| hsa-miR-6810-5p | NM_001302504 | NLRC4 | 0.03090052  | CDS  |
| hsa-miR-6810-3p | NM_001302504 | NLRC4 | 0.02225154  | 5UTR |
| hsa-miR-6810-3p | NM_001302504 | NLRC4 | 0.000719145 | CDS  |
| hsa-miR-6811-5p | NM_001302504 | NLRC4 | 0.004854961 | CDS  |
| hsa-miR-6811-3p | NM_001302504 | NLRC4 | 0.01135416  | 5UTR |
| hsa-miR-6812-5p | NM_001302504 | NLRC4 | 0.0195374   | 5UTR |
| hsa-miR-6812-3p | NM_001302504 | NLRC4 | 0.07413136  | 5UTR |
| hsa-miR-6813-5p | NM_001302504 | NLRC4 | 0.005421949 | CDS  |
| hsa-miR-6813-5p | NM_001302504 | NLRC4 | 0.005846554 | 5UTR |
| hsa-miR-6813-3p | NM_001302504 | NLRC4 | 0.004504892 | CDS  |
| hsa-miR-6814-5p | NM_001302504 | NLRC4 | 0.000118833 | CDS  |
| hsa-miR-6814-5p | NM_001302504 | NLRC4 | 0.000721914 | CDS  |
| hsa-miR-6815-5p | NM_001302504 | NLRC4 | 2.91E-05    | 5UTR |
| hsa-miR-6815-3p | NM_001302504 | NLRC4 | 7.51E-05    | CDS  |
| hsa-miR-6816-5p | NM_001302504 | NLRC4 | 0.003007178 | 5UTR |
| hsa-miR-6816-3p | NM_001302504 | NLRC4 | 3.04E-06    | CDS  |
| hsa-miR-6817-5p | NM_001302504 | NLRC4 | 0.000196593 | CDS  |
| hsa-miR-6817-5p | NM_001302504 | NLRC4 | 0.000653259 | CDS  |
| hsa-miR-6817-3p | NM_001302504 | NLRC4 | 0.000719145 | CDS  |
| hsa-miR-6819-5p | NM_001302504 | NLRC4 | 0.004916043 | 5UTR |
| hsa-miR-6820-5p | NM_001302504 | NLRC4 | 0.01148179  | CDS  |
| hsa-miR-6820-5p | NM_001302504 | NLRC4 | 0.004002253 | 5UTR |
| hsa-miR-6821-5p | NM_001302504 | NLRC4 | 1.39E-05    | CDS  |
| hsa-miR-6821-5p | NM_001302504 | NLRC4 | 0.002220645 | 5UTR |
| hsa-miR-6821-3p | NM_001302504 | NLRC4 | 0.000215389 | CDS  |
| hsa-miR-6822-5p | NM_001302504 | NLRC4 | 0.008674456 | 5UTR |
| hsa-miR-6823-5p | NM_001302504 | NLRC4 | 0.005846554 | 5UTR |
| hsa-miR-6823-5p | NM_001302504 | NLRC4 | 0.003455527 | CDS  |
| hsa-miR-6823-5p | NM_001302504 | NLRC4 | 0.006498872 | CDS  |
| hsa-miR-6824-5p | NM_001302504 | NLRC4 | 0.006363825 | 5UTR |
| hsa-miR-6824-5p | NM_001302504 | NLRC4 | 0.002757795 | CDS  |
| hsa-miR-6824-3p | NM_001302504 | NLRC4 | 0.01411228  | CDS  |
| hsa-miR-6824-3p | NM_001302504 | NLRC4 | 0.02569602  | 5UTR |

|                  |              |       |             |      |
|------------------|--------------|-------|-------------|------|
| hsa-miR-6825-5p  | NM_001302504 | NLRC4 | 0.005039915 | 5UTR |
| hsa-miR-6825-3p  | NM_001302504 | NLRC4 | 2.28E-05    | CDS  |
| hsa-miR-6826-5p  | NM_001302504 | NLRC4 | 0.005759136 | CDS  |
| hsa-miR-6826-5p  | NM_001302504 | NLRC4 | 6.00E-05    | CDS  |
| hsa-miR-6826-3p  | NM_001302504 | NLRC4 | 0.000225565 | CDS  |
| hsa-miR-6826-3p  | NM_001302504 | NLRC4 | 0.000123249 | CDS  |
| hsa-miR-6827-5p  | NM_001302504 | NLRC4 | 0.000201083 | CDS  |
| hsa-miR-6828-3p  | NM_001302504 | NLRC4 | 0.04682227  | 5UTR |
| hsa-miR-6829-5p  | NM_001302504 | NLRC4 | 0.000294775 | CDS  |
| hsa-miR-6829-3p  | NM_001302504 | NLRC4 | 0.003672413 | CDS  |
| hsa-miR-6830-5p  | NM_001302504 | NLRC4 | 0.004487638 | CDS  |
| hsa-miR-6830-3p  | NM_001302504 | NLRC4 | 0.001206662 | CDS  |
| hsa-miR-6830-3p  | NM_001302504 | NLRC4 | 0.000122181 | CDS  |
| hsa-miR-6830-3p  | NM_001302504 | NLRC4 | 0.07566784  | 5UTR |
| hsa-miR-6831-5p  | NM_001302504 | NLRC4 | 0.006682669 | CDS  |
| hsa-miR-6832-5p  | NM_001302504 | NLRC4 | 0.03581307  | CDS  |
| hsa-miR-6833-3p  | NM_001302504 | NLRC4 | 0.000143515 | CDS  |
| hsa-miR-6834-5p  | NM_001302504 | NLRC4 | 0.03581307  | CDS  |
| hsa-miR-6834-3p  | NM_001302504 | NLRC4 | 0.008510362 | CDS  |
| hsa-miR-6834-3p  | NM_001302504 | NLRC4 | 0.000319363 | 5UTR |
| hsa-miR-6780b-5p | NM_001302504 | NLRC4 | 0.02261598  | CDS  |
| hsa-miR-6836-5p  | NM_001302504 | NLRC4 | 0.006363825 | 5UTR |
| hsa-miR-6836-3p  | NM_001302504 | NLRC4 | 0.000196593 | CDS  |
| hsa-miR-6837-5p  | NM_001302504 | NLRC4 | 1.92E-06    | CDS  |
| hsa-miR-6837-5p  | NM_001302504 | NLRC4 | 8.08E-05    | 5UTR |
| hsa-miR-6837-3p  | NM_001302504 | NLRC4 | 0.000616998 | CDS  |
| hsa-miR-6838-5p  | NM_001302504 | NLRC4 | 0.000605168 | CDS  |
| hsa-miR-6838-3p  | NM_001302504 | NLRC4 | 4.96E-05    | CDS  |
| hsa-miR-6838-3p  | NM_001302504 | NLRC4 | 0.000248086 | CDS  |
| hsa-miR-6839-5p  | NM_001302504 | NLRC4 | 0.002919858 | 5UTR |
| hsa-miR-6839-3p  | NM_001302504 | NLRC4 | 0.003503197 | CDS  |
| hsa-miR-6840-3p  | NM_001302504 | NLRC4 | 6.23E-05    | 5UTR |
| hsa-miR-6842-5p  | NM_001302504 | NLRC4 | 0.003661642 | CDS  |
| hsa-miR-6842-5p  | NM_001302504 | NLRC4 | 0.000133165 | CDS  |
| hsa-miR-6842-3p  | NM_001302504 | NLRC4 | 1.35E-05    | CDS  |
| hsa-miR-6842-3p  | NM_001302504 | NLRC4 | 0.008691157 | 5UTR |
| hsa-miR-6843-3p  | NM_001302504 | NLRC4 | 2.13E-05    | CDS  |
| hsa-miR-6845-5p  | NM_001302504 | NLRC4 | 0.008674456 | 5UTR |
| hsa-miR-6845-3p  | NM_001302504 | NLRC4 | 0.05096433  | 5UTR |
| hsa-miR-6846-5p  | NM_001302504 | NLRC4 | 0.04340877  | CDS  |
| hsa-miR-6846-5p  | NM_001302504 | NLRC4 | 0.006212097 | 5UTR |
| hsa-miR-6847-5p  | NM_001302504 | NLRC4 | 0.000166471 | 5UTR |
| hsa-miR-6847-5p  | NM_001302504 | NLRC4 | 5.44E-05    | 5UTR |
| hsa-miR-6847-3p  | NM_001302504 | NLRC4 | 0.006918507 | CDS  |

|                  |              |       |             |      |
|------------------|--------------|-------|-------------|------|
| hsa-miR-6847-3p  | NM_001302504 | NLRC4 | 0.0532159   | CDS  |
| hsa-miR-6847-3p  | NM_001302504 | NLRC4 | 0.008037564 | CDS  |
| hsa-miR-6848-5p  | NM_001302504 | NLRC4 | 0.006212097 | 5UTR |
| hsa-miR-6848-3p  | NM_001302504 | NLRC4 | 0.003661642 | CDS  |
| hsa-miR-6849-5p  | NM_001302504 | NLRC4 | 0.006459822 | CDS  |
| hsa-miR-6849-3p  | NM_001302504 | NLRC4 | 0.000233119 | 5UTR |
| hsa-miR-6849-3p  | NM_001302504 | NLRC4 | 8.09E-06    | CDS  |
| hsa-miR-6850-5p  | NM_001302504 | NLRC4 | 1.39E-05    | CDS  |
| hsa-miR-6851-5p  | NM_001302504 | NLRC4 | 0.002744245 | 5UTR |
| hsa-miR-6852-5p  | NM_001302504 | NLRC4 | 0.02225154  | 5UTR |
| hsa-miR-6852-5p  | NM_001302504 | NLRC4 | 0.004916043 | 5UTR |
| hsa-miR-6853-5p  | NM_001302504 | NLRC4 | 0.000357171 | CDS  |
| hsa-miR-6854-5p  | NM_001302504 | NLRC4 | 3.70E-05    | CDS  |
| hsa-miR-6855-5p  | NM_001302504 | NLRC4 | 0.004916043 | 5UTR |
| hsa-miR-6855-5p  | NM_001302504 | NLRC4 | 4.02E-07    | CDS  |
| hsa-miR-6856-5p  | NM_001302504 | NLRC4 | 0.001026694 | 5UTR |
| hsa-miR-6856-5p  | NM_001302504 | NLRC4 | 0.004462303 | CDS  |
| hsa-miR-6856-3p  | NM_001302504 | NLRC4 | 0.04304292  | 5UTR |
| hsa-miR-6857-5p  | NM_001302504 | NLRC4 | 0.006212097 | 5UTR |
| hsa-miR-6857-3p  | NM_001302504 | NLRC4 | 0.000733641 | 5UTR |
| hsa-miR-6858-5p  | NM_001302504 | NLRC4 | 0.002220645 | 5UTR |
| hsa-miR-6858-5p  | NM_001302504 | NLRC4 | 0.00953199  | CDS  |
| hsa-miR-6858-3p  | NM_001302504 | NLRC4 | 0.000170659 | CDS  |
| hsa-miR-6859-5p  | NM_001302504 | NLRC4 | 0.002468036 | CDS  |
| hsa-miR-6769b-5p | NM_001302504 | NLRC4 | 0.03853267  | CDS  |
| hsa-miR-6769b-3p | NM_001302504 | NLRC4 | 0.000225565 | CDS  |
| hsa-miR-6860     | NM_001302504 | NLRC4 | 1.92E-06    | CDS  |
| hsa-miR-6860     | NM_001302504 | NLRC4 | 0.002587252 | 5UTR |
| hsa-miR-6861-5p  | NM_001302504 | NLRC4 | 0.003230363 | 5UTR |
| hsa-miR-6861-5p  | NM_001302504 | NLRC4 | 4.54E-05    | CDS  |
| hsa-miR-6862-5p  | NM_001302504 | NLRC4 | 0.01919602  | CDS  |
| hsa-miR-6862-3p  | NM_001302504 | NLRC4 | 0.000140506 | CDS  |
| hsa-miR-6864-3p  | NM_001302504 | NLRC4 | 0.000357171 | CDS  |
| hsa-miR-6865-5p  | NM_001302504 | NLRC4 | 0.0150907   | CDS  |
| hsa-miR-6865-5p  | NM_001302504 | NLRC4 | 0.000230589 | CDS  |
| hsa-miR-6866-5p  | NM_001302504 | NLRC4 | 0.04340877  | CDS  |
| hsa-miR-6866-5p  | NM_001302504 | NLRC4 | 0.001440022 | CDS  |
| hsa-miR-6866-3p  | NM_001302504 | NLRC4 | 0.007176909 | 5UTR |
| hsa-miR-6866-3p  | NM_001302504 | NLRC4 | 0.00199289  | CDS  |
| hsa-miR-6869-5p  | NM_001302504 | NLRC4 | 0.002220645 | 5UTR |
| hsa-miR-6869-5p  | NM_001302504 | NLRC4 | 0.01718499  | CDS  |
| hsa-miR-6871-5p  | NM_001302504 | NLRC4 | 0.004002253 | 5UTR |
| hsa-miR-6871-5p  | NM_001302504 | NLRC4 | 0.001244899 | CDS  |
| hsa-miR-6871-3p  | NM_001302504 | NLRC4 | 8.09E-06    | CDS  |

|                 |              |       |             |      |
|-----------------|--------------|-------|-------------|------|
| hsa-miR-6872-5p | NM_001302504 | NLRC4 | 0.02567779  | CDS  |
| hsa-miR-6872-5p | NM_001302504 | NLRC4 | 0.01148179  | CDS  |
| hsa-miR-6873-5p | NM_001302504 | NLRC4 | 0.004002253 | 5UTR |
| hsa-miR-6875-3p | NM_001302504 | NLRC4 | 0.001206662 | CDS  |
| hsa-miR-6876-5p | NM_001302504 | NLRC4 | 0.06344209  | CDS  |
| hsa-miR-6876-3p | NM_001302504 | NLRC4 | 2.13E-05    | CDS  |
| hsa-miR-6876-3p | NM_001302504 | NLRC4 | 0.01282145  | CDS  |
| hsa-miR-6879-5p | NM_001302504 | NLRC4 | 6.00E-06    | CDS  |
| hsa-miR-6879-5p | NM_001302504 | NLRC4 | 0.001404358 | 5UTR |
| hsa-miR-6879-3p | NM_001302504 | NLRC4 | 0.000196593 | CDS  |
| hsa-miR-6880-5p | NM_001302504 | NLRC4 | 0.007301686 | CDS  |
| hsa-miR-6880-3p | NM_001302504 | NLRC4 | 5.87E-05    | CDS  |
| hsa-miR-6881-5p | NM_001302504 | NLRC4 | 0.005727952 | 5UTR |
| hsa-miR-6881-3p | NM_001302504 | NLRC4 | 0.000215389 | CDS  |
| hsa-miR-6882-5p | NM_001302504 | NLRC4 | 0.002677635 | CDS  |
| hsa-miR-6884-3p | NM_001302504 | NLRC4 | 0.000120074 | CDS  |
| hsa-miR-6885-5p | NM_001302504 | NLRC4 | 0.06344209  | CDS  |
| hsa-miR-6885-3p | NM_001302504 | NLRC4 | 0.000378314 | CDS  |
| hsa-miR-6886-5p | NM_001302504 | NLRC4 | 0.001763547 | CDS  |
| hsa-miR-6886-5p | NM_001302504 | NLRC4 | 0.01442079  | 5UTR |
| hsa-miR-6887-3p | NM_001302504 | NLRC4 | 0.000719145 | CDS  |
| hsa-miR-6888-5p | NM_001302504 | NLRC4 | 0.000294775 | CDS  |
| hsa-miR-6888-3p | NM_001302504 | NLRC4 | 0.05185139  | CDS  |
| hsa-miR-6889-3p | NM_001302504 | NLRC4 | 0.01135416  | 5UTR |
| hsa-miR-6890-5p | NM_001302504 | NLRC4 | 0.004002253 | 5UTR |
| hsa-miR-6890-5p | NM_001302504 | NLRC4 | 0.003203264 | CDS  |
| hsa-miR-6892-5p | NM_001302504 | NLRC4 | 0.007968493 | CDS  |
| hsa-miR-6892-3p | NM_001302504 | NLRC4 | 0.000719145 | CDS  |
| hsa-miR-6893-5p | NM_001302504 | NLRC4 | 0.000952318 | CDS  |
| hsa-miR-6893-5p | NM_001302504 | NLRC4 | 0.01099788  | CDS  |
| hsa-miR-6893-3p | NM_001302504 | NLRC4 | 0.02225154  | 5UTR |
| hsa-miR-6893-3p | NM_001302504 | NLRC4 | 7.91E-05    | CDS  |
| hsa-miR-6894-5p | NM_001302504 | NLRC4 | 0.04411314  | CDS  |
| hsa-miR-6895-5p | NM_001302504 | NLRC4 | 6.00E-06    | CDS  |
| hsa-miR-6895-5p | NM_001302504 | NLRC4 | 0.008674456 | 5UTR |
| hsa-miR-7106-3p | NM_001302504 | NLRC4 | 0.02569602  | 5UTR |
| hsa-miR-7108-5p | NM_001302504 | NLRC4 | 0.000378665 | CDS  |
| hsa-miR-7108-5p | NM_001302504 | NLRC4 | 0.000104007 | CDS  |
| hsa-miR-7108-5p | NM_001302504 | NLRC4 | 0.000357171 | CDS  |
| hsa-miR-7109-5p | NM_001302504 | NLRC4 | 0.009218169 | CDS  |
| hsa-miR-7110-3p | NM_001302504 | NLRC4 | 0.000719145 | CDS  |
| hsa-miR-7111-5p | NM_001302504 | NLRC4 | 0.003007178 | 5UTR |
| hsa-miR-7111-5p | NM_001302504 | NLRC4 | 5.60E-05    | CDS  |
| hsa-miR-7111-3p | NM_001302504 | NLRC4 | 0.000123249 | CDS  |

|                  |              |       |             |      |
|------------------|--------------|-------|-------------|------|
| hsa-miR-7112-3p  | NM_001302504 | NLRC4 | 8.91E-06    | CDS  |
| hsa-miR-7113-3p  | NM_001302504 | NLRC4 | 0.000215389 | CDS  |
| hsa-miR-7114-3p  | NM_001302504 | NLRC4 | 0.005833398 | CDS  |
| hsa-miR-7150     | NM_001302504 | NLRC4 | 0.004040886 | 5UTR |
| hsa-miR-7150     | NM_001302504 | NLRC4 | 0.009218169 | CDS  |
| hsa-miR-7151-5p  | NM_001302504 | NLRC4 | 0.003398753 | CDS  |
| hsa-miR-7151-3p  | NM_001302504 | NLRC4 | 0.001033441 | CDS  |
| hsa-miR-7152-5p  | NM_001302504 | NLRC4 | 0.02698587  | 5UTR |
| hsa-miR-7152-3p  | NM_001302504 | NLRC4 | 0.002061538 | CDS  |
| hsa-miR-7152-3p  | NM_001302504 | NLRC4 | 0.03090247  | CDS  |
| hsa-miR-7154-3p  | NM_001302504 | NLRC4 | 0.001831151 | CDS  |
| hsa-miR-7154-3p  | NM_001302504 | NLRC4 | 0.06344209  | CDS  |
| hsa-miR-7155-5p  | NM_001302504 | NLRC4 | 0.004916043 | 5UTR |
| hsa-miR-7156-5p  | NM_001302504 | NLRC4 | 0.01719664  | CDS  |
| hsa-miR-7156-3p  | NM_001302504 | NLRC4 | 2.31E-05    | 5UTR |
| hsa-miR-7156-3p  | NM_001302504 | NLRC4 | 1.14E-07    | CDS  |
| hsa-miR-7158-5p  | NM_001302504 | NLRC4 | 2.15E-05    | CDS  |
| hsa-miR-7161-3p  | NM_001302504 | NLRC4 | 0.1263682   | CDS  |
| hsa-miR-7161-3p  | NM_001302504 | NLRC4 | 0.00199289  | CDS  |
| hsa-miR-7160-3p  | NM_001302504 | NLRC4 | 2.73E-06    | CDS  |
| hsa-miR-7703     | NM_001302504 | NLRC4 | 2.28E-05    | CDS  |
| hsa-miR-7703     | NM_001302504 | NLRC4 | 0.02225154  | 5UTR |
| hsa-miR-7703     | NM_001302504 | NLRC4 | 0.002434622 | CDS  |
| hsa-miR-7705     | NM_001302504 | NLRC4 | 0.000271192 | CDS  |
| hsa-miR-7706     | NM_001302504 | NLRC4 | 0.000722117 | CDS  |
| hsa-miR-7706     | NM_001302504 | NLRC4 | 2.13E-05    | CDS  |
| hsa-miR-7843-5p  | NM_001302504 | NLRC4 | 5.60E-05    | CDS  |
| hsa-miR-7843-5p  | NM_001302504 | NLRC4 | 0.001764953 | 5UTR |
| hsa-miR-4433b-3p | NM_001302504 | NLRC4 | 0.005022004 | CDS  |
| hsa-miR-1273h-3p | NM_001302504 | NLRC4 | 0.000889202 | CDS  |
| hsa-miR-6516-5p  | NM_001302504 | NLRC4 | 0.000441884 | CDS  |
| hsa-miR-7845-5p  | NM_001302504 | NLRC4 | 0.004916043 | 5UTR |
| hsa-miR-7845-5p  | NM_001302504 | NLRC4 | 0.01218382  | CDS  |
| hsa-miR-7846-3p  | NM_001302504 | NLRC4 | 0.000400492 | CDS  |
| hsa-miR-7847-3p  | NM_001302504 | NLRC4 | 0.000605168 | CDS  |
| hsa-miR-7847-3p  | NM_001302504 | NLRC4 | 0.000668733 | CDS  |
| hsa-miR-7847-3p  | NM_001302504 | NLRC4 | 6.23E-05    | 5UTR |
| hsa-miR-7848-3p  | NM_001302504 | NLRC4 | 0.000161927 | CDS  |
| hsa-miR-7848-3p  | NM_001302504 | NLRC4 | 0.000280807 | 5UTR |
| hsa-miR-7851-3p  | NM_001302504 | NLRC4 | 0.04728263  | CDS  |
| hsa-miR-7853-5p  | NM_001302504 | NLRC4 | 6.41E-06    | CDS  |
| hsa-miR-7854-3p  | NM_001302504 | NLRC4 | 0.002007726 | 5UTR |
| hsa-miR-548ba    | NM_001302504 | NLRC4 | 0.02268423  | CDS  |
| hsa-miR-7974     | NM_001302504 | NLRC4 | 6.71E-05    | 5UTR |

|                   |              |       |             |      |
|-------------------|--------------|-------|-------------|------|
| hsa-miR-7974      | NM_001302504 | NLRC4 | 0.003518183 | CDS  |
| hsa-miR-7978      | NM_001302504 | NLRC4 | 0.000260618 | CDS  |
| hsa-miR-8055      | NM_001302504 | NLRC4 | 0.03853794  | 5UTR |
| hsa-miR-8055      | NM_001302504 | NLRC4 | 0.08763861  | CDS  |
| hsa-miR-8058      | NM_001302504 | NLRC4 | 1.21E-05    | CDS  |
| hsa-miR-8060      | NM_001302504 | NLRC4 | 0.000115979 | CDS  |
| hsa-miR-8064      | NM_001302504 | NLRC4 | 0.000167343 | CDS  |
| hsa-miR-8064      | NM_001302504 | NLRC4 | 0.03650309  | 5UTR |
| hsa-miR-8065      | NM_001302504 | NLRC4 | 0.002757795 | CDS  |
| hsa-miR-8069      | NM_001302504 | NLRC4 | 0.000262096 | 5UTR |
| hsa-miR-8069      | NM_001302504 | NLRC4 | 0.000977407 | CDS  |
| hsa-miR-8071      | NM_001302504 | NLRC4 | 0.000166471 | 5UTR |
| hsa-miR-8071      | NM_001302504 | NLRC4 | 0.01434077  | CDS  |
| hsa-miR-8072      | NM_001302504 | NLRC4 | 0.001687649 | 5UTR |
| hsa-miR-8072      | NM_001302504 | NLRC4 | 0.009218169 | CDS  |
| hsa-miR-8074      | NM_001302504 | NLRC4 | 0.002648495 | CDS  |
| hsa-miR-8075      | NM_001302504 | NLRC4 | 0.004365555 | CDS  |
| hsa-miR-8075      | NM_001302504 | NLRC4 | 1.62E-05    | 5UTR |
| hsa-miR-8077      | NM_001302504 | NLRC4 | 0.00092503  | CDS  |
| hsa-miR-8077      | NM_001302504 | NLRC4 | 0.001687649 | 5UTR |
| hsa-miR-8077      | NM_001302504 | NLRC4 | 0.000427409 | CDS  |
| hsa-miR-8082      | NM_001302504 | NLRC4 | 2.66E-05    | 5UTR |
| hsa-miR-8083      | NM_001302504 | NLRC4 | 0.03188717  | CDS  |
| hsa-miR-8085      | NM_001302504 | NLRC4 | 0.003479938 | CDS  |
| hsa-miR-8087      | NM_001302504 | NLRC4 | 0.002256679 | CDS  |
| hsa-miR-8087      | NM_001302504 | NLRC4 | 0.1494865   | 5UTR |
| hsa-miR-8089      | NM_001302504 | NLRC4 | 0.003230363 | 5UTR |
| hsa-miR-8089      | NM_001302504 | NLRC4 | 9.79E-05    | 5UTR |
| hsa-miR-9899      | NM_001302504 | NLRC4 | 4.05E-05    | CDS  |
| hsa-miR-9901      | NM_001302504 | NLRC4 | 0.005613622 | CDS  |
| hsa-miR-9901      | NM_001302504 | NLRC4 | 0.000404732 | 5UTR |
| hsa-miR-9901      | NM_001302504 | NLRC4 | 0.03090052  | CDS  |
| hsa-miR-9902      | NM_001302504 | NLRC4 | 6.23E-05    | 5UTR |
| hsa-miR-1843      | NM_001302504 | NLRC4 | 0.000111712 | CDS  |
| hsa-miR-9986      | NM_001302504 | NLRC4 | 0.03629209  | CDS  |
| hsa-miR-10226     | NM_001302504 | NLRC4 | 0.05000951  | CDS  |
| hsa-miR-10392-5p  | NM_001302504 | NLRC4 | 0.004769708 | CDS  |
| hsa-miR-10392-3p  | NM_001302504 | NLRC4 | 1.02E-07    | CDS  |
| hsa-miR-10394-5p  | NM_001302504 | NLRC4 | 0.000260618 | CDS  |
| hsa-miR-10394-3p  | NM_001302504 | NLRC4 | 0.000262096 | 5UTR |
| hsa-miR-10394-3p  | NM_001302504 | NLRC4 | 0.000129336 | CDS  |
| hsa-miR-10396a-5p | NM_001302504 | NLRC4 | 6.47E-06    | CDS  |
| hsa-miR-10396a-5p | NM_001302504 | NLRC4 | 0.008644879 | 5UTR |
| hsa-miR-10396a-5p | NM_001302504 | NLRC4 | 0.004040886 | 5UTR |



|                   |              |       |             |      |
|-------------------|--------------|-------|-------------|------|
| hsa-miR-10397-5p  | NM_001302504 | NLRC4 | 0.02569602  | 5UTR |
| hsa-miR-10398-3p  | NM_001302504 | NLRC4 | 0.003272409 | 5UTR |
| hsa-miR-10398-3p  | NM_001302504 | NLRC4 | 6.23E-05    | 5UTR |
| hsa-miR-10399-3p  | NM_001302504 | NLRC4 | 0.000952318 | CDS  |
| hsa-miR-10400-5p  | NM_001302504 | NLRC4 | 0.001404358 | 5UTR |
| hsa-miR-10400-3p  | NM_001302504 | NLRC4 | 0.02599771  | CDS  |
| hsa-miR-10401-3p  | NM_001302504 | NLRC4 | 0.000215389 | CDS  |
| hsa-miR-10401-3p  | NM_001302504 | NLRC4 | 0.00013388  | CDS  |
| hsa-miR-10401-3p  | NM_001302504 | NLRC4 | 0.000285506 | 5UTR |
| hsa-miR-10396b-5p | NM_001302504 | NLRC4 | 0.004002253 | 5UTR |
| hsa-miR-10396b-5p | NM_001302504 | NLRC4 | 6.47E-06    | CDS  |
| hsa-miR-10396b-3p | NM_001302504 | NLRC4 | 0.000262096 | 5UTR |
| hsa-miR-10526-3p  | NM_001302504 | NLRC4 | 0.001026694 | 5UTR |
| hsa-miR-11181-3p  | NM_001302504 | NLRC4 | 0.004928285 | CDS  |
| hsa-miR-11181-3p  | NM_001302504 | NLRC4 | 0.002389222 | CDS  |
| hsa-miR-11399     | NM_001302504 | NLRC4 | 1.02E-07    | CDS  |
| hsa-miR-11399     | NM_001302504 | NLRC4 | 0.005023276 | CDS  |
| hsa-miR-11400     | NM_001302504 | NLRC4 | 0.006918507 | CDS  |
| hsa-miR-3059-3p   | NM_001302504 | NLRC4 | 0.001797576 | CDS  |
| hsa-miR-3085-3p   | NM_001302504 | NLRC4 | 5.14E-05    | CDS  |
| hsa-miR-6529-5p   | NM_001302504 | NLRC4 | 0.000136395 | 5UTR |
| hsa-miR-6529-3p   | NM_001302504 | NLRC4 | 0.01135416  | 5UTR |
| hsa-miR-9851-5p   | NM_001302504 | NLRC4 | 0.000378314 | CDS  |
| hsa-miR-9851-5p   | NM_001302504 | NLRC4 | 1.98E-07    | CDS  |
| hsa-miR-9851-3p   | NM_001302504 | NLRC4 | 1.39E-05    | CDS  |
| hsa-miR-12113     | NM_001302504 | NLRC4 | 0.001666469 | CDS  |
| hsa-miR-12114     | NM_001302504 | NLRC4 | 0.01804454  | CDS  |
| hsa-miR-12114     | NM_001302504 | NLRC4 | 0.005846554 | 5UTR |
| hsa-miR-12115     | NM_001302504 | NLRC4 | 0.01408661  | CDS  |
| hsa-miR-12115     | NM_001302504 | NLRC4 | 0.001230162 | 5UTR |
| hsa-miR-12116     | NM_001302504 | NLRC4 | 0.000180286 | 5UTR |
| hsa-miR-12117     | NM_001302504 | NLRC4 | 0.000129336 | CDS  |
| hsa-miR-12117     | NM_001302504 | NLRC4 | 0.01214554  | CDS  |
| hsa-miR-12118     | NM_001302504 | NLRC4 | 0.000262096 | 5UTR |
| hsa-miR-12120     | NM_001302504 | NLRC4 | 0.007482492 | CDS  |
| hsa-miR-12120     | NM_001302504 | NLRC4 | 0.01680466  | 5UTR |
| hsa-miR-12121     | NM_001302504 | NLRC4 | 2.10E-05    | 5UTR |
| hsa-miR-12121     | NM_001302504 | NLRC4 | 0.000196593 | CDS  |
| hsa-miR-12122     | NM_001302504 | NLRC4 | 0.02545618  | 5UTR |
| hsa-miR-12124     | NM_001302504 | NLRC4 | 0.002007726 | 5UTR |
| hsa-miR-12126     | NM_001302504 | NLRC4 | 0.000262096 | 5UTR |
| hsa-miR-12126     | NM_001302504 | NLRC4 | 0.000427409 | CDS  |
| hsa-miR-12127     | NM_001302504 | NLRC4 | 0.005846554 | 5UTR |
| hsa-miR-12128     | NM_001302504 | NLRC4 | 2.16E-05    | 5UTR |

|                  |              |       |             |      |
|------------------|--------------|-------|-------------|------|
| hsa-miR-12129    | NM_001302504 | NLRC4 | 0.000517298 | CDS  |
| hsa-miR-12130    | NM_001302504 | NLRC4 | 0.000361707 | CDS  |
| hsa-miR-12131    | NM_001302504 | NLRC4 | 0.001018132 | 5UTR |
| hsa-let-7a-5p    | XM_017004619 | NLRC4 | 0.00237631  | CDS  |
| hsa-let-7a-2-3p  | XM_017004619 | NLRC4 | 0.006712235 | CDS  |
| hsa-let-7a-2-3p  | XM_017004619 | NLRC4 | 6.12E-05    | 3UTR |
| hsa-let-7b-5p    | XM_017004619 | NLRC4 | 0.00237631  | CDS  |
| hsa-let-7b-5p    | XM_017004619 | NLRC4 | 0.000133333 | CDS  |
| hsa-let-7c-5p    | XM_017004619 | NLRC4 | 0.00237631  | CDS  |
| hsa-let-7d-5p    | XM_017004619 | NLRC4 | 0.00237631  | CDS  |
| hsa-let-7e-5p    | XM_017004619 | NLRC4 | 2.55E-05    | CDS  |
| hsa-let-7e-3p    | XM_017004619 | NLRC4 | 2.67E-05    | 3UTR |
| hsa-let-7f-1-3p  | XM_017004619 | NLRC4 | 0.000104981 | 5UTR |
| hsa-miR-15a-5p   | XM_017004619 | NLRC4 | 0.001159809 | CDS  |
| hsa-miR-15a-5p   | XM_017004619 | NLRC4 | 0.000338269 | CDS  |
| hsa-miR-15a-3p   | XM_017004619 | NLRC4 | 1.49E-05    | CDS  |
| hsa-miR-15a-3p   | XM_017004619 | NLRC4 | 7.08E-06    | CDS  |
| hsa-miR-17-3p    | XM_017004619 | NLRC4 | 0.001752888 | CDS  |
| hsa-miR-18a-3p   | XM_017004619 | NLRC4 | 0.006075034 | CDS  |
| hsa-miR-19b-2-5p | XM_017004619 | NLRC4 | 0.00033047  | CDS  |
| hsa-miR-20a-3p   | XM_017004619 | NLRC4 | 0.02262559  | CDS  |
| hsa-miR-21-5p    | XM_017004619 | NLRC4 | 0.05139873  | CDS  |
| hsa-miR-22-5p    | XM_017004619 | NLRC4 | 0.001206662 | CDS  |
| hsa-miR-22-3p    | XM_017004619 | NLRC4 | 0.000535464 | CDS  |
| hsa-miR-23a-5p   | XM_017004619 | NLRC4 | 4.59E-05    | CDS  |
| hsa-miR-23a-5p   | XM_017004619 | NLRC4 | 0.01095107  | CDS  |
| hsa-miR-23a-5p   | XM_017004619 | NLRC4 | 7.19E-05    | CDS  |
| hsa-miR-23a-5p   | XM_017004619 | NLRC4 | 1.36E-05    | 3UTR |
| hsa-miR-23a-3p   | XM_017004619 | NLRC4 | 0.005620409 | CDS  |
| hsa-miR-24-3p    | XM_017004619 | NLRC4 | 4.24E-05    | CDS  |
| hsa-miR-25-3p    | XM_017004619 | NLRC4 | 0.000369226 | 3UTR |
| hsa-miR-26a-1-3p | XM_017004619 | NLRC4 | 0.000285706 | CDS  |
| hsa-miR-26a-1-3p | XM_017004619 | NLRC4 | 0.004030374 | CDS  |
| hsa-miR-26b-3p   | XM_017004619 | NLRC4 | 0.000381964 | CDS  |
| hsa-miR-27a-5p   | XM_017004619 | NLRC4 | 0.000121209 | CDS  |
| hsa-miR-27a-3p   | XM_017004619 | NLRC4 | 2.13E-05    | CDS  |
| hsa-miR-28-5p    | XM_017004619 | NLRC4 | 0.000268963 | CDS  |
| hsa-miR-28-3p    | XM_017004619 | NLRC4 | 0.03211739  | CDS  |
| hsa-miR-30a-3p   | XM_017004619 | NLRC4 | 2.96E-05    | CDS  |
| hsa-miR-31-3p    | XM_017004619 | NLRC4 | 2.83E-05    | CDS  |
| hsa-miR-33a-3p   | XM_017004619 | NLRC4 | 0.000787757 | CDS  |
| hsa-miR-33a-3p   | XM_017004619 | NLRC4 | 6.58E-06    | CDS  |
| hsa-miR-92a-1-5p | XM_017004619 | NLRC4 | 0.001447161 | CDS  |
| hsa-miR-92a-3p   | XM_017004619 | NLRC4 | 9.46E-05    | CDS  |

|                   |              |       |             |      |
|-------------------|--------------|-------|-------------|------|
| hsa-miR-92a-3p    | XM_017004619 | NLRC4 | 0.000998661 | CDS  |
| hsa-miR-92a-2-5p  | XM_017004619 | NLRC4 | 3.15E-05    | CDS  |
| hsa-miR-92a-2-5p  | XM_017004619 | NLRC4 | 0.009044755 | CDS  |
| hsa-miR-93-3p     | XM_017004619 | NLRC4 | 0.001014772 | CDS  |
| hsa-miR-96-5p     | XM_017004619 | NLRC4 | 2.27E-05    | CDS  |
| hsa-miR-96-3p     | XM_017004619 | NLRC4 | 4.87E-05    | 3UTR |
| hsa-miR-99a-3p    | XM_017004619 | NLRC4 | 0.00012139  | CDS  |
| hsa-miR-101-5p    | XM_017004619 | NLRC4 | 1.46E-05    | CDS  |
| hsa-miR-29b-1-5p  | XM_017004619 | NLRC4 | 0.003088161 | CDS  |
| hsa-miR-29b-2-5p  | XM_017004619 | NLRC4 | 3.76E-05    | CDS  |
| hsa-miR-29b-2-5p  | XM_017004619 | NLRC4 | 5.48E-05    | CDS  |
| hsa-miR-29b-2-5p  | XM_017004619 | NLRC4 | 0.000618871 | CDS  |
| hsa-miR-103a-1-5p | XM_017004619 | NLRC4 | 1.36E-05    | 3UTR |
| hsa-miR-105-3p    | XM_017004619 | NLRC4 | 0.000855203 | CDS  |
| hsa-miR-105-3p    | XM_017004619 | NLRC4 | 0.00132712  | CDS  |
| hsa-miR-192-3p    | XM_017004619 | NLRC4 | 6.06E-05    | CDS  |
| hsa-miR-192-3p    | XM_017004619 | NLRC4 | 0.000831238 | CDS  |
| hsa-miR-196a-5p   | XM_017004619 | NLRC4 | 0.000764946 | CDS  |
| hsa-miR-197-5p    | XM_017004619 | NLRC4 | 0.002810449 | CDS  |
| hsa-miR-197-5p    | XM_017004619 | NLRC4 | 2.14E-05    | 5UTR |
| hsa-miR-197-3p    | XM_017004619 | NLRC4 | 5.87E-05    | CDS  |
| hsa-miR-198       | XM_017004619 | NLRC4 | 0.02831089  | CDS  |
| hsa-miR-198       | XM_017004619 | NLRC4 | 0.000226722 | CDS  |
| hsa-miR-199a-5p   | XM_017004619 | NLRC4 | 3.03E-05    | CDS  |
| hsa-miR-199a-3p   | XM_017004619 | NLRC4 | 1.33E-07    | CDS  |
| hsa-miR-208a-5p   | XM_017004619 | NLRC4 | 0.295269    | 5UTR |
| hsa-miR-129-5p    | XM_017004619 | NLRC4 | 0.01566064  | CDS  |
| hsa-miR-148a-5p   | XM_017004619 | NLRC4 | 0.000837869 | CDS  |
| hsa-miR-30c-5p    | XM_017004619 | NLRC4 | 0.009171114 | CDS  |
| hsa-miR-30c-2-3p  | XM_017004619 | NLRC4 | 0.001886311 | 5UTR |
| hsa-miR-30c-2-3p  | XM_017004619 | NLRC4 | 0.00210636  | CDS  |
| hsa-miR-30c-2-3p  | XM_017004619 | NLRC4 | 0.000135949 | CDS  |
| hsa-miR-30d-3p    | XM_017004619 | NLRC4 | 0.000441884 | CDS  |
| hsa-miR-139-5p    | XM_017004619 | NLRC4 | 0.005620409 | CDS  |
| hsa-miR-139-3p    | XM_017004619 | NLRC4 | 0.000123213 | CDS  |
| hsa-miR-10a-5p    | XM_017004619 | NLRC4 | 7.28E-05    | CDS  |
| hsa-miR-34a-5p    | XM_017004619 | NLRC4 | 0.01732928  | CDS  |
| hsa-miR-34a-5p    | XM_017004619 | NLRC4 | 7.72E-06    | CDS  |
| hsa-miR-181a-5p   | XM_017004619 | NLRC4 | 7.76E-05    | CDS  |
| hsa-miR-181b-5p   | XM_017004619 | NLRC4 | 7.76E-05    | CDS  |
| hsa-miR-181c-5p   | XM_017004619 | NLRC4 | 7.76E-05    | CDS  |
| hsa-miR-187-5p    | XM_017004619 | NLRC4 | 0.000953849 | CDS  |
| hsa-miR-187-3p    | XM_017004619 | NLRC4 | 0.01050676  | CDS  |
| hsa-miR-196a-3p   | XM_017004619 | NLRC4 | 0.002975243 | CDS  |

|                   |              |       |             |      |
|-------------------|--------------|-------|-------------|------|
| hsa-miR-196a-3p   | XM_017004619 | NLRC4 | 6.98E-06    | CDS  |
| hsa-miR-199b-5p   | XM_017004619 | NLRC4 | 3.03E-05    | CDS  |
| hsa-miR-199b-3p   | XM_017004619 | NLRC4 | 1.33E-07    | CDS  |
| hsa-miR-203a-5p   | XM_017004619 | NLRC4 | 0.002346565 | CDS  |
| hsa-miR-204-5p    | XM_017004619 | NLRC4 | 0.000199878 | CDS  |
| hsa-miR-204-3p    | XM_017004619 | NLRC4 | 0.00101605  | 5UTR |
| hsa-miR-205-5p    | XM_017004619 | NLRC4 | 6.20E-07    | CDS  |
| hsa-miR-205-5p    | XM_017004619 | NLRC4 | 0.00027781  | CDS  |
| hsa-miR-205-3p    | XM_017004619 | NLRC4 | 0.04157089  | CDS  |
| hsa-miR-210-5p    | XM_017004619 | NLRC4 | 6.58E-06    | CDS  |
| hsa-miR-210-5p    | XM_017004619 | NLRC4 | 2.13E-05    | CDS  |
| hsa-miR-210-3p    | XM_017004619 | NLRC4 | 1.85E-06    | CDS  |
| hsa-miR-210-3p    | XM_017004619 | NLRC4 | 7.71E-05    | CDS  |
| hsa-miR-211-5p    | XM_017004619 | NLRC4 | 0.000199878 | CDS  |
| hsa-miR-211-5p    | XM_017004619 | NLRC4 | 0.01223285  | CDS  |
| hsa-miR-212-5p    | XM_017004619 | NLRC4 | 5.29E-05    | 3UTR |
| hsa-miR-212-5p    | XM_017004619 | NLRC4 | 0.000443412 | CDS  |
| hsa-miR-212-3p    | XM_017004619 | NLRC4 | 5.23E-05    | CDS  |
| hsa-miR-214-5p    | XM_017004619 | NLRC4 | 0.000164624 | CDS  |
| hsa-miR-214-5p    | XM_017004619 | NLRC4 | 0.000923374 | CDS  |
| hsa-miR-214-3p    | XM_017004619 | NLRC4 | 6.67E-05    | CDS  |
| hsa-miR-214-3p    | XM_017004619 | NLRC4 | 1.32E-05    | CDS  |
| hsa-miR-215-3p    | XM_017004619 | NLRC4 | 0.01223285  | CDS  |
| hsa-miR-215-3p    | XM_017004619 | NLRC4 | 0.000552817 | CDS  |
| hsa-miR-216a-5p   | XM_017004619 | NLRC4 | 0.001022618 | CDS  |
| hsa-miR-216a-3p   | XM_017004619 | NLRC4 | 3.42E-07    | CDS  |
| hsa-miR-216a-3p   | XM_017004619 | NLRC4 | 0.02825249  | CDS  |
| hsa-miR-217-5p    | XM_017004619 | NLRC4 | 0.07041108  | CDS  |
| hsa-miR-218-1-3p  | XM_017004619 | NLRC4 | 0.005266164 | CDS  |
| hsa-miR-218-2-3p  | XM_017004619 | NLRC4 | 0.000842272 | CDS  |
| hsa-miR-219a-1-3p | XM_017004619 | NLRC4 | 0.000926972 | CDS  |
| hsa-miR-219a-1-3p | XM_017004619 | NLRC4 | 0.002226838 | CDS  |
| hsa-miR-221-3p    | XM_017004619 | NLRC4 | 7.69E-06    | CDS  |
| hsa-miR-221-3p    | XM_017004619 | NLRC4 | 0.000281735 | CDS  |
| hsa-miR-222-5p    | XM_017004619 | NLRC4 | 4.44E-07    | CDS  |
| hsa-miR-222-3p    | XM_017004619 | NLRC4 | 0.003752472 | CDS  |
| hsa-miR-223-5p    | XM_017004619 | NLRC4 | 0.000799382 | CDS  |
| hsa-miR-200b-5p   | XM_017004619 | NLRC4 | 0.1399983   | CDS  |
| hsa-miR-200b-5p   | XM_017004619 | NLRC4 | 7.08E-06    | CDS  |
| hsa-miR-200b-3p   | XM_017004619 | NLRC4 | 0.03757485  | CDS  |
| hsa-let-7i-3p     | XM_017004619 | NLRC4 | 8.94E-05    | CDS  |
| hsa-let-7i-3p     | XM_017004619 | NLRC4 | 0.000324004 | CDS  |
| hsa-miR-15b-5p    | XM_017004619 | NLRC4 | 7.72E-06    | CDS  |
| hsa-miR-15b-5p    | XM_017004619 | NLRC4 | 0.001159809 | CDS  |

|                   |              |       |             |      |
|-------------------|--------------|-------|-------------|------|
| hsa-miR-23b-5p    | XM_017004619 | NLRC4 | 0.008415762 | CDS  |
| hsa-miR-23b-5p    | XM_017004619 | NLRC4 | 0.000859196 | CDS  |
| hsa-miR-23b-5p    | XM_017004619 | NLRC4 | 5.54E-06    | CDS  |
| hsa-miR-23b-3p    | XM_017004619 | NLRC4 | 0.005620409 | CDS  |
| hsa-miR-27b-3p    | XM_017004619 | NLRC4 | 2.13E-05    | CDS  |
| hsa-miR-30b-3p    | XM_017004619 | NLRC4 | 0.000441884 | CDS  |
| hsa-miR-122-5p    | XM_017004619 | NLRC4 | 4.95E-07    | CDS  |
| hsa-miR-124-5p    | XM_017004619 | NLRC4 | 0.001114676 | CDS  |
| hsa-miR-124-5p    | XM_017004619 | NLRC4 | 0.000787757 | CDS  |
| hsa-miR-124-3p    | XM_017004619 | NLRC4 | 0.001897022 | CDS  |
| hsa-miR-125b-1-3p | XM_017004619 | NLRC4 | 3.99E-05    | CDS  |
| hsa-miR-125b-1-3p | XM_017004619 | NLRC4 | 9.25E-07    | CDS  |
| hsa-miR-125b-1-3p | XM_017004619 | NLRC4 | 6.44E-05    | CDS  |
| hsa-miR-128-1-5p  | XM_017004619 | NLRC4 | 0.001727314 | CDS  |
| hsa-miR-128-1-5p  | XM_017004619 | NLRC4 | 1.86E-05    | CDS  |
| hsa-miR-128-1-5p  | XM_017004619 | NLRC4 | 6.65E-06    | CDS  |
| hsa-miR-128-3p    | XM_017004619 | NLRC4 | 3.42E-07    | CDS  |
| hsa-miR-128-3p    | XM_017004619 | NLRC4 | 9.39E-05    | CDS  |
| hsa-miR-132-3p    | XM_017004619 | NLRC4 | 4.15E-05    | CDS  |
| hsa-miR-133a-3p   | XM_017004619 | NLRC4 | 5.77E-05    | CDS  |
| hsa-miR-135a-3p   | XM_017004619 | NLRC4 | 8.25E-06    | CDS  |
| hsa-miR-135a-3p   | XM_017004619 | NLRC4 | 5.90E-05    | CDS  |
| hsa-miR-135a-3p   | XM_017004619 | NLRC4 | 9.74E-05    | CDS  |
| hsa-miR-135a-3p   | XM_017004619 | NLRC4 | 0.005224415 | CDS  |
| hsa-miR-135a-2-3p | XM_017004619 | NLRC4 | 0.00232753  | CDS  |
| hsa-miR-135a-2-3p | XM_017004619 | NLRC4 | 0.01000834  | CDS  |
| hsa-miR-137-5p    | XM_017004619 | NLRC4 | 0.001170791 | CDS  |
| hsa-miR-138-5p    | XM_017004619 | NLRC4 | 3.23E-06    | CDS  |
| hsa-miR-138-5p    | XM_017004619 | NLRC4 | 7.76E-05    | CDS  |
| hsa-miR-140-3p    | XM_017004619 | NLRC4 | 9.39E-05    | CDS  |
| hsa-miR-141-5p    | XM_017004619 | NLRC4 | 1.83E-05    | 3UTR |
| hsa-miR-141-5p    | XM_017004619 | NLRC4 | 0.000632874 | CDS  |
| hsa-miR-142-3p    | XM_017004619 | NLRC4 | 0.009171114 | CDS  |
| hsa-miR-142-3p    | XM_017004619 | NLRC4 | 0.000596955 | 5UTR |
| hsa-miR-143-5p    | XM_017004619 | NLRC4 | 4.42E-05    | CDS  |
| hsa-miR-143-5p    | XM_017004619 | NLRC4 | 0.000216501 | CDS  |
| hsa-miR-143-5p    | XM_017004619 | NLRC4 | 0.002444199 | CDS  |
| hsa-miR-143-3p    | XM_017004619 | NLRC4 | 0.000169476 | CDS  |
| hsa-miR-145-5p    | XM_017004619 | NLRC4 | 4.03E-05    | CDS  |
| hsa-miR-145-5p    | XM_017004619 | NLRC4 | 3.37E-05    | 3UTR |
| hsa-miR-152-5p    | XM_017004619 | NLRC4 | 0.006198772 | CDS  |
| hsa-miR-191-3p    | XM_017004619 | NLRC4 | 0.1076955   | CDS  |
| hsa-miR-191-3p    | XM_017004619 | NLRC4 | 6.12E-05    | 3UTR |
| hsa-miR-9-5p      | XM_017004619 | NLRC4 | 0.008738688 | CDS  |

|                   |              |       |             |      |
|-------------------|--------------|-------|-------------|------|
| hsa-miR-9-5p      | XM_017004619 | NLRC4 | 0.000535268 | CDS  |
| hsa-miR-9-5p      | XM_017004619 | NLRC4 | 0.001361655 | CDS  |
| hsa-miR-125a-5p   | XM_017004619 | NLRC4 | 0.05124352  | CDS  |
| hsa-miR-125a-3p   | XM_017004619 | NLRC4 | 9.25E-07    | CDS  |
| hsa-miR-125a-3p   | XM_017004619 | NLRC4 | 3.16E-06    | CDS  |
| hsa-miR-125b-2-3p | XM_017004619 | NLRC4 | 3.99E-05    | CDS  |
| hsa-miR-126-3p    | XM_017004619 | NLRC4 | 0.002564212 | CDS  |
| hsa-miR-127-5p    | XM_017004619 | NLRC4 | 1.12E-05    | CDS  |
| hsa-miR-127-5p    | XM_017004619 | NLRC4 | 0.007362526 | CDS  |
| hsa-miR-127-3p    | XM_017004619 | NLRC4 | 0.000469601 | 3UTR |
| hsa-miR-134-5p    | XM_017004619 | NLRC4 | 0.000103244 | CDS  |
| hsa-miR-134-5p    | XM_017004619 | NLRC4 | 0.06985438  | CDS  |
| hsa-miR-138-1-3p  | XM_017004619 | NLRC4 | 8.97E-06    | CDS  |
| hsa-miR-149-5p    | XM_017004619 | NLRC4 | 0.001304349 | CDS  |
| hsa-miR-149-3p    | XM_017004619 | NLRC4 | 0.0264118   | CDS  |
| hsa-miR-149-3p    | XM_017004619 | NLRC4 | 0.03273842  | CDS  |
| hsa-miR-150-3p    | XM_017004619 | NLRC4 | 0.000216501 | CDS  |
| hsa-miR-150-3p    | XM_017004619 | NLRC4 | 0.002208114 | CDS  |
| hsa-miR-154-5p    | XM_017004619 | NLRC4 | 0.000645022 | 3UTR |
| hsa-miR-154-5p    | XM_017004619 | NLRC4 | 0.01861651  | CDS  |
| hsa-miR-185-3p    | XM_017004619 | NLRC4 | 0.000189447 | CDS  |
| hsa-miR-185-3p    | XM_017004619 | NLRC4 | 3.68E-05    | CDS  |
| hsa-miR-188-5p    | XM_017004619 | NLRC4 | 0.002217478 | CDS  |
| hsa-miR-188-5p    | XM_017004619 | NLRC4 | 0.00027781  | CDS  |
| hsa-miR-188-3p    | XM_017004619 | NLRC4 | 9.81E-05    | CDS  |
| hsa-miR-193a-5p   | XM_017004619 | NLRC4 | 0.000297589 | CDS  |
| hsa-miR-193a-5p   | XM_017004619 | NLRC4 | 0.00016652  | CDS  |
| hsa-miR-194-5p    | XM_017004619 | NLRC4 | 0.000972019 | CDS  |
| hsa-miR-194-5p    | XM_017004619 | NLRC4 | 0.000542025 | CDS  |
| hsa-miR-195-3p    | XM_017004619 | NLRC4 | 0.05157565  | 5UTR |
| hsa-miR-320a-5p   | XM_017004619 | NLRC4 | 0.000447996 | CDS  |
| hsa-miR-320a-5p   | XM_017004619 | NLRC4 | 5.89E-05    | 3UTR |
| hsa-miR-200c-5p   | XM_017004619 | NLRC4 | 1.12E-05    | CDS  |
| hsa-miR-200c-3p   | XM_017004619 | NLRC4 | 0.000905537 | CDS  |
| hsa-miR-155-3p    | XM_017004619 | NLRC4 | 1.56E-05    | CDS  |
| hsa-miR-194-3p    | XM_017004619 | NLRC4 | 1.46E-05    | CDS  |
| hsa-miR-194-3p    | XM_017004619 | NLRC4 | 6.67E-05    | CDS  |
| hsa-miR-194-3p    | XM_017004619 | NLRC4 | 0.01738552  | 5UTR |
| hsa-miR-106b-3p   | XM_017004619 | NLRC4 | 6.05E-07    | CDS  |
| hsa-miR-106b-3p   | XM_017004619 | NLRC4 | 1.12E-05    | CDS  |
| hsa-miR-106b-3p   | XM_017004619 | NLRC4 | 0.002488019 | CDS  |
| hsa-miR-200a-5p   | XM_017004619 | NLRC4 | 0.000108746 | 3UTR |
| hsa-miR-200a-5p   | XM_017004619 | NLRC4 | 0.002472386 | CDS  |
| hsa-miR-302a-5p   | XM_017004619 | NLRC4 | 0.2170907   | CDS  |

|                   |              |       |             |      |
|-------------------|--------------|-------|-------------|------|
| hsa-miR-302a-3p   | XM_017004619 | NLRC4 | 0.002346565 | CDS  |
| hsa-miR-302a-3p   | XM_017004619 | NLRC4 | 0.000963264 | CDS  |
| hsa-miR-219a-2-3p | XM_017004619 | NLRC4 | 0.000317774 | CDS  |
| hsa-miR-299-5p    | XM_017004619 | NLRC4 | 1.59E-05    | 3UTR |
| hsa-miR-299-3p    | XM_017004619 | NLRC4 | 0.001897022 | CDS  |
| hsa-miR-99b-5p    | XM_017004619 | NLRC4 | 4.19E-05    | CDS  |
| hsa-miR-99b-3p    | XM_017004619 | NLRC4 | 1.54E-05    | CDS  |
| hsa-miR-296-3p    | XM_017004619 | NLRC4 | 0.09012369  | CDS  |
| hsa-miR-296-3p    | XM_017004619 | NLRC4 | 0.000598122 | CDS  |
| hsa-miR-130b-5p   | XM_017004619 | NLRC4 | 1.82E-06    | CDS  |
| hsa-miR-361-3p    | XM_017004619 | NLRC4 | 2.86E-05    | 3UTR |
| hsa-miR-361-3p    | XM_017004619 | NLRC4 | 0.001157739 | CDS  |
| hsa-miR-361-3p    | XM_017004619 | NLRC4 | 1.46E-05    | CDS  |
| hsa-miR-363-5p    | XM_017004619 | NLRC4 | 1.74E-05    | 3UTR |
| hsa-miR-363-5p    | XM_017004619 | NLRC4 | 0.003344924 | CDS  |
| hsa-miR-363-3p    | XM_017004619 | NLRC4 | 0.000645022 | 3UTR |
| hsa-miR-365a-5p   | XM_017004619 | NLRC4 | 0.000207579 | CDS  |
| hsa-miR-365a-5p   | XM_017004619 | NLRC4 | 0.008461483 | CDS  |
| hsa-miR-365b-5p   | XM_017004619 | NLRC4 | 0.001447161 | CDS  |
| hsa-miR-365b-5p   | XM_017004619 | NLRC4 | 3.58E-06    | CDS  |
| hsa-miR-302c-5p   | XM_017004619 | NLRC4 | 6.05E-07    | CDS  |
| hsa-miR-302c-3p   | XM_017004619 | NLRC4 | 2.73E-06    | CDS  |
| hsa-miR-302c-3p   | XM_017004619 | NLRC4 | 0.2914223   | 5UTR |
| hsa-miR-376c-5p   | XM_017004619 | NLRC4 | 0.01718499  | CDS  |
| hsa-miR-369-5p    | XM_017004619 | NLRC4 | 2.60E-05    | 3UTR |
| hsa-miR-370-5p    | XM_017004619 | NLRC4 | 6.66E-06    | CDS  |
| hsa-miR-370-5p    | XM_017004619 | NLRC4 | 6.24E-05    | CDS  |
| hsa-miR-370-3p    | XM_017004619 | NLRC4 | 0.000649339 | CDS  |
| hsa-miR-370-3p    | XM_017004619 | NLRC4 | 4.25E-05    | CDS  |
| hsa-miR-371a-5p   | XM_017004619 | NLRC4 | 0.000385323 | CDS  |
| hsa-miR-371a-5p   | XM_017004619 | NLRC4 | 0.000104356 | CDS  |
| hsa-miR-371a-3p   | XM_017004619 | NLRC4 | 2.88E-05    | CDS  |
| hsa-miR-372-5p    | XM_017004619 | NLRC4 | 0.000265951 | CDS  |
| hsa-miR-373-3p    | XM_017004619 | NLRC4 | 0.005454844 | CDS  |
| hsa-miR-375-5p    | XM_017004619 | NLRC4 | 1.36E-05    | CDS  |
| hsa-miR-376a-5p   | XM_017004619 | NLRC4 | 0.00043678  | CDS  |
| hsa-miR-376a-3p   | XM_017004619 | NLRC4 | 0.02815383  | CDS  |
| hsa-miR-377-5p    | XM_017004619 | NLRC4 | 0.000664408 | CDS  |
| hsa-miR-377-5p    | XM_017004619 | NLRC4 | 1.13E-05    | CDS  |
| hsa-miR-378a-5p   | XM_017004619 | NLRC4 | 0.000542111 | CDS  |
| hsa-miR-380-5p    | XM_017004619 | NLRC4 | 0.000276588 | 5UTR |
| hsa-miR-381-5p    | XM_017004619 | NLRC4 | 0.00043678  | CDS  |
| hsa-miR-381-5p    | XM_017004619 | NLRC4 | 1.04E-05    | 5UTR |
| hsa-miR-381-3p    | XM_017004619 | NLRC4 | 0.01388229  | CDS  |

|                 |              |       |             |      |
|-----------------|--------------|-------|-------------|------|
| hsa-miR-382-5p  | XM_017004619 | NLRC4 | 0.000963264 | CDS  |
| hsa-miR-383-5p  | XM_017004619 | NLRC4 | 0.01864953  | CDS  |
| hsa-miR-383-3p  | XM_017004619 | NLRC4 | 7.08E-06    | CDS  |
| hsa-miR-383-3p  | XM_017004619 | NLRC4 | 0.008073378 | CDS  |
| hsa-miR-330-5p  | XM_017004619 | NLRC4 | 0.004474328 | CDS  |
| hsa-miR-330-5p  | XM_017004619 | NLRC4 | 0.000106281 | CDS  |
| hsa-miR-330-5p  | XM_017004619 | NLRC4 | 7.16E-06    | CDS  |
| hsa-miR-330-3p  | XM_017004619 | NLRC4 | 0.000464893 | CDS  |
| hsa-miR-330-3p  | XM_017004619 | NLRC4 | 1.01E-05    | CDS  |
| hsa-miR-330-3p  | XM_017004619 | NLRC4 | 5.89E-05    | 3UTR |
| hsa-miR-328-3p  | XM_017004619 | NLRC4 | 1.35E-05    | CDS  |
| hsa-miR-328-3p  | XM_017004619 | NLRC4 | 8.38E-06    | CDS  |
| hsa-miR-342-5p  | XM_017004619 | NLRC4 | 0.000101259 | CDS  |
| hsa-miR-342-5p  | XM_017004619 | NLRC4 | 0.001516459 | CDS  |
| hsa-miR-323a-5p | XM_017004619 | NLRC4 | 0.000565653 | 3UTR |
| hsa-miR-323a-5p | XM_017004619 | NLRC4 | 4.99E-06    | CDS  |
| hsa-miR-323a-5p | XM_017004619 | NLRC4 | 0.01064677  | CDS  |
| hsa-miR-326     | XM_017004619 | NLRC4 | 0.00120872  | CDS  |
| hsa-miR-326     | XM_017004619 | NLRC4 | 7.16E-06    | CDS  |
| hsa-miR-326     | XM_017004619 | NLRC4 | 0.000595816 | CDS  |
| hsa-miR-151a-5p | XM_017004619 | NLRC4 | 0.001239845 | CDS  |
| hsa-miR-151a-3p | XM_017004619 | NLRC4 | 0.001481713 | CDS  |
| hsa-miR-151a-3p | XM_017004619 | NLRC4 | 0.000238785 | CDS  |
| hsa-miR-135b-5p | XM_017004619 | NLRC4 | 9.72E-05    | CDS  |
| hsa-miR-331-5p  | XM_017004619 | NLRC4 | 0.00128942  | CDS  |
| hsa-miR-331-3p  | XM_017004619 | NLRC4 | 7.16E-06    | CDS  |
| hsa-miR-331-3p  | XM_017004619 | NLRC4 | 5.29E-05    | 3UTR |
| hsa-miR-324-5p  | XM_017004619 | NLRC4 | 2.59E-05    | CDS  |
| hsa-miR-324-5p  | XM_017004619 | NLRC4 | 7.69E-06    | CDS  |
| hsa-miR-324-5p  | XM_017004619 | NLRC4 | 0.000116174 | CDS  |
| hsa-miR-324-3p  | XM_017004619 | NLRC4 | 3.50E-05    | CDS  |
| hsa-miR-324-3p  | XM_017004619 | NLRC4 | 0.000337721 | 3UTR |
| hsa-miR-324-3p  | XM_017004619 | NLRC4 | 4.84E-07    | CDS  |
| hsa-miR-339-5p  | XM_017004619 | NLRC4 | 0.000381964 | CDS  |
| hsa-miR-339-5p  | XM_017004619 | NLRC4 | 0.000268253 | CDS  |
| hsa-miR-339-3p  | XM_017004619 | NLRC4 | 0.02165254  | CDS  |
| hsa-miR-339-3p  | XM_017004619 | NLRC4 | 6.90E-06    | CDS  |
| hsa-miR-133b    | XM_017004619 | NLRC4 | 5.77E-05    | CDS  |
| hsa-miR-133b    | XM_017004619 | NLRC4 | 0.000946251 | CDS  |
| hsa-miR-325     | XM_017004619 | NLRC4 | 0.000120896 | CDS  |
| hsa-miR-345-5p  | XM_017004619 | NLRC4 | 1.22E-05    | CDS  |
| hsa-miR-345-5p  | XM_017004619 | NLRC4 | 0.003088161 | CDS  |
| hsa-miR-345-3p  | XM_017004619 | NLRC4 | 0.002217478 | CDS  |
| hsa-miR-346     | XM_017004619 | NLRC4 | 8.36E-05    | 3UTR |



|                 |              |       |             |      |
|-----------------|--------------|-------|-------------|------|
| hsa-miR-346     | XM_017004619 | NLRC4 | 8.86E-07    | CDS  |
| hsa-miR-346     | XM_017004619 | NLRC4 | 2.92E-05    | CDS  |
| hsa-miR-422a    | XM_017004619 | NLRC4 | 0.01176218  | CDS  |
| hsa-miR-422a    | XM_017004619 | NLRC4 | 0.02675239  | CDS  |
| hsa-miR-423-5p  | XM_017004619 | NLRC4 | 0.007362526 | CDS  |
| hsa-miR-423-3p  | XM_017004619 | NLRC4 | 0.001031207 | CDS  |
| hsa-miR-423-3p  | XM_017004619 | NLRC4 | 1.91E-05    | CDS  |
| hsa-miR-423-3p  | XM_017004619 | NLRC4 | 1.10E-08    | CDS  |
| hsa-miR-423-3p  | XM_017004619 | NLRC4 | 2.59E-05    | CDS  |
| hsa-miR-424-5p  | XM_017004619 | NLRC4 | 9.20E-06    | CDS  |
| hsa-miR-424-3p  | XM_017004619 | NLRC4 | 0.000107277 | CDS  |
| hsa-miR-424-3p  | XM_017004619 | NLRC4 | 0.000241027 | CDS  |
| hsa-miR-425-3p  | XM_017004619 | NLRC4 | 0.001262872 | CDS  |
| hsa-miR-425-3p  | XM_017004619 | NLRC4 | 0.08715581  | CDS  |
| hsa-miR-425-3p  | XM_017004619 | NLRC4 | 0.00128942  | CDS  |
| hsa-miR-18b-3p  | XM_017004619 | NLRC4 | 0.000583201 | CDS  |
| hsa-miR-18b-3p  | XM_017004619 | NLRC4 | 1.93E-05    | 5UTR |
| hsa-miR-18b-3p  | XM_017004619 | NLRC4 | 0.000166253 | CDS  |
| hsa-miR-20b-3p  | XM_017004619 | NLRC4 | 9.02E-06    | CDS  |
| hsa-miR-20b-3p  | XM_017004619 | NLRC4 | 6.02E-08    | CDS  |
| hsa-miR-448     | XM_017004619 | NLRC4 | 9.46E-05    | CDS  |
| hsa-miR-448     | XM_017004619 | NLRC4 | 1.24E-05    | CDS  |
| hsa-miR-449a    | XM_017004619 | NLRC4 | 0.01176218  | CDS  |
| hsa-miR-431-3p  | XM_017004619 | NLRC4 | 0.002444199 | CDS  |
| hsa-miR-431-3p  | XM_017004619 | NLRC4 | 0.01322285  | CDS  |
| hsa-miR-433-3p  | XM_017004619 | NLRC4 | 0.000146875 | CDS  |
| hsa-miR-329-5p  | XM_017004619 | NLRC4 | 0.001309985 | CDS  |
| hsa-miR-329-5p  | XM_017004619 | NLRC4 | 0.01322285  | CDS  |
| hsa-miR-329-5p  | XM_017004619 | NLRC4 | 0.001409008 | CDS  |
| hsa-miR-329-3p  | XM_017004619 | NLRC4 | 0.000652497 | CDS  |
| hsa-miR-452-5p  | XM_017004619 | NLRC4 | 0.000882282 | CDS  |
| hsa-miR-409-5p  | XM_017004619 | NLRC4 | 8.39E-05    | CDS  |
| hsa-miR-412-5p  | XM_017004619 | NLRC4 | 3.99E-05    | CDS  |
| hsa-miR-412-3p  | XM_017004619 | NLRC4 | 3.43E-05    | 3UTR |
| hsa-miR-410-5p  | XM_017004619 | NLRC4 | 0.02268423  | CDS  |
| hsa-miR-376b-5p | XM_017004619 | NLRC4 | 0.01718499  | CDS  |
| hsa-miR-483-5p  | XM_017004619 | NLRC4 | 0.01924989  | CDS  |
| hsa-miR-483-3p  | XM_017004619 | NLRC4 | 0.000337721 | 3UTR |
| hsa-miR-484     | XM_017004619 | NLRC4 | 1.91E-05    | CDS  |
| hsa-miR-485-5p  | XM_017004619 | NLRC4 | 4.35E-05    | CDS  |
| hsa-miR-485-5p  | XM_017004619 | NLRC4 | 8.69E-06    | CDS  |
| hsa-miR-485-3p  | XM_017004619 | NLRC4 | 2.83E-05    | CDS  |
| hsa-miR-485-3p  | XM_017004619 | NLRC4 | 1.22E-05    | CDS  |
| hsa-miR-486-5p  | XM_017004619 | NLRC4 | 0.000106281 | CDS  |

|                 |              |       |             |      |
|-----------------|--------------|-------|-------------|------|
| hsa-miR-486-3p  | XM_017004619 | NLRC4 | 0.001239845 | CDS  |
| hsa-miR-486-3p  | XM_017004619 | NLRC4 | 0.000441636 | CDS  |
| hsa-miR-487a-5p | XM_017004619 | NLRC4 | 0.001064408 | CDS  |
| hsa-miR-488-5p  | XM_017004619 | NLRC4 | 3.78E-05    | CDS  |
| hsa-miR-490-5p  | XM_017004619 | NLRC4 | 3.50E-05    | CDS  |
| hsa-miR-491-5p  | XM_017004619 | NLRC4 | 0.000345859 | CDS  |
| hsa-miR-491-5p  | XM_017004619 | NLRC4 | 0.003560324 | CDS  |
| hsa-miR-491-3p  | XM_017004619 | NLRC4 | 1.14E-05    | CDS  |
| hsa-miR-511-5p  | XM_017004619 | NLRC4 | 0.01050676  | CDS  |
| hsa-miR-511-5p  | XM_017004619 | NLRC4 | 0.1045722   | CDS  |
| hsa-miR-146b-5p | XM_017004619 | NLRC4 | 0.000174632 | CDS  |
| hsa-miR-202-3p  | XM_017004619 | NLRC4 | 7.36E-06    | CDS  |
| hsa-miR-202-3p  | XM_017004619 | NLRC4 | 0.000334534 | CDS  |
| hsa-miR-492     | XM_017004619 | NLRC4 | 3.78E-05    | CDS  |
| hsa-miR-492     | XM_017004619 | NLRC4 | 0.001633284 | CDS  |
| hsa-miR-493-5p  | XM_017004619 | NLRC4 | 0.001102841 | CDS  |
| hsa-miR-493-3p  | XM_017004619 | NLRC4 | 2.60E-05    | 3UTR |
| hsa-miR-493-3p  | XM_017004619 | NLRC4 | 0.001058805 | CDS  |
| hsa-miR-432-5p  | XM_017004619 | NLRC4 | 0.00210636  | CDS  |
| hsa-miR-432-5p  | XM_017004619 | NLRC4 | 0.001013066 | CDS  |
| hsa-miR-432-5p  | XM_017004619 | NLRC4 | 0.02313586  | CDS  |
| hsa-miR-432-5p  | XM_017004619 | NLRC4 | 6.97E-06    | CDS  |
| hsa-miR-432-3p  | XM_017004619 | NLRC4 | 7.74E-05    | CDS  |
| hsa-miR-432-3p  | XM_017004619 | NLRC4 | 1.96E-05    | CDS  |
| hsa-miR-494-5p  | XM_017004619 | NLRC4 | 0.003523479 | 5UTR |
| hsa-miR-494-5p  | XM_017004619 | NLRC4 | 2.03E-05    | 5UTR |
| hsa-miR-494-5p  | XM_017004619 | NLRC4 | 1.46E-05    | CDS  |
| hsa-miR-495-5p  | XM_017004619 | NLRC4 | 8.39E-05    | CDS  |
| hsa-miR-193b-5p | XM_017004619 | NLRC4 | 3.17E-07    | CDS  |
| hsa-miR-193b-5p | XM_017004619 | NLRC4 | 0.007721901 | CDS  |
| hsa-miR-497-5p  | XM_017004619 | NLRC4 | 0.001159809 | CDS  |
| hsa-miR-497-5p  | XM_017004619 | NLRC4 | 7.38E-06    | CDS  |
| hsa-miR-497-5p  | XM_017004619 | NLRC4 | 0.000338269 | CDS  |
| hsa-miR-181d-3p | XM_017004619 | NLRC4 | 0.002934367 | CDS  |
| hsa-miR-181d-3p | XM_017004619 | NLRC4 | 3.52E-05    | CDS  |
| hsa-miR-181d-3p | XM_017004619 | NLRC4 | 3.42E-07    | CDS  |
| hsa-miR-512-5p  | XM_017004619 | NLRC4 | 2.31E-05    | CDS  |
| hsa-miR-512-3p  | XM_017004619 | NLRC4 | 0.001062038 | CDS  |
| hsa-miR-498-3p  | XM_017004619 | NLRC4 | 0.000125663 | CDS  |
| hsa-miR-498-3p  | XM_017004619 | NLRC4 | 7.01E-06    | CDS  |
| hsa-miR-520e-5p | XM_017004619 | NLRC4 | 0.004557198 | CDS  |
| hsa-miR-515-3p  | XM_017004619 | NLRC4 | 0.02165254  | CDS  |
| hsa-miR-519e-3p | XM_017004619 | NLRC4 | 5.93E-05    | 3UTR |
| hsa-miR-519c-5p | XM_017004619 | NLRC4 | 0.004557198 | CDS  |

|                 |              |       |             |      |
|-----------------|--------------|-------|-------------|------|
| hsa-miR-519c-5p | XM_017004619 | NLRC4 | 0.001727314 | CDS  |
| hsa-miR-519c-5p | XM_017004619 | NLRC4 | 1.11E-05    | CDS  |
| hsa-miR-519c-3p | XM_017004619 | NLRC4 | 0.004721326 | CDS  |
| hsa-miR-520a-5p | XM_017004619 | NLRC4 | 1.11E-05    | CDS  |
| hsa-miR-520a-5p | XM_017004619 | NLRC4 | 0.001727314 | CDS  |
| hsa-miR-526b-5p | XM_017004619 | NLRC4 | 0.004557198 | CDS  |
| hsa-miR-519b-5p | XM_017004619 | NLRC4 | 0.004557198 | CDS  |
| hsa-miR-519b-5p | XM_017004619 | NLRC4 | 0.001727314 | CDS  |
| hsa-miR-519b-5p | XM_017004619 | NLRC4 | 1.11E-05    | CDS  |
| hsa-miR-525-5p  | XM_017004619 | NLRC4 | 0.001727314 | CDS  |
| hsa-miR-525-5p  | XM_017004619 | NLRC4 | 1.11E-05    | CDS  |
| hsa-miR-525-5p  | XM_017004619 | NLRC4 | 3.98E-05    | CDS  |
| hsa-miR-525-3p  | XM_017004619 | NLRC4 | 1.13E-05    | CDS  |
| hsa-miR-525-3p  | XM_017004619 | NLRC4 | 1.86E-05    | CDS  |
| hsa-miR-523-5p  | XM_017004619 | NLRC4 | 0.004557198 | CDS  |
| hsa-miR-523-5p  | XM_017004619 | NLRC4 | 0.001727314 | CDS  |
| hsa-miR-523-5p  | XM_017004619 | NLRC4 | 1.11E-05    | CDS  |
| hsa-miR-523-3p  | XM_017004619 | NLRC4 | 1.86E-05    | CDS  |
| hsa-miR-518f-5p | XM_017004619 | NLRC4 | 1.11E-05    | CDS  |
| hsa-miR-518f-5p | XM_017004619 | NLRC4 | 0.001727314 | CDS  |
| hsa-miR-518f-3p | XM_017004619 | NLRC4 | 0.007995041 | CDS  |
| hsa-miR-520b-5p | XM_017004619 | NLRC4 | 5.22E-07    | CDS  |
| hsa-miR-520b-5p | XM_017004619 | NLRC4 | 0.001408827 | CDS  |
| hsa-miR-518b    | XM_017004619 | NLRC4 | 1.61E-05    | CDS  |
| hsa-miR-526a-5p | XM_017004619 | NLRC4 | 0.001727314 | CDS  |
| hsa-miR-526a-5p | XM_017004619 | NLRC4 | 1.11E-05    | CDS  |
| hsa-miR-520c-5p | XM_017004619 | NLRC4 | 0.001727314 | CDS  |
| hsa-miR-520c-5p | XM_017004619 | NLRC4 | 1.11E-05    | CDS  |
| hsa-miR-518c-5p | XM_017004619 | NLRC4 | 7.16E-06    | CDS  |
| hsa-miR-518c-5p | XM_017004619 | NLRC4 | 0.002919858 | 5UTR |
| hsa-miR-518c-3p | XM_017004619 | NLRC4 | 0.004768539 | CDS  |
| hsa-miR-524-3p  | XM_017004619 | NLRC4 | 1.13E-05    | CDS  |
| hsa-miR-524-3p  | XM_017004619 | NLRC4 | 1.86E-05    | CDS  |
| hsa-miR-524-3p  | XM_017004619 | NLRC4 | 0.000519135 | CDS  |
| hsa-miR-517a-3p | XM_017004619 | NLRC4 | 6.23E-05    | CDS  |
| hsa-miR-517a-3p | XM_017004619 | NLRC4 | 5.88E-05    | 3UTR |
| hsa-miR-517a-3p | XM_017004619 | NLRC4 | 0.008510362 | CDS  |
| hsa-miR-519d-3p | XM_017004619 | NLRC4 | 1.01E-05    | CDS  |
| hsa-miR-521     | XM_017004619 | NLRC4 | 6.37E-06    | CDS  |
| hsa-miR-520d-5p | XM_017004619 | NLRC4 | 0.000116123 | CDS  |
| hsa-miR-520d-3p | XM_017004619 | NLRC4 | 2.88E-05    | CDS  |
| hsa-miR-520d-3p | XM_017004619 | NLRC4 | 0.004768539 | CDS  |
| hsa-miR-517b-3p | XM_017004619 | NLRC4 | 6.23E-05    | CDS  |
| hsa-miR-517b-3p | XM_017004619 | NLRC4 | 5.88E-05    | 3UTR |

|                   |              |       |             |      |
|-------------------|--------------|-------|-------------|------|
| hsa-miR-517b-3p   | XM_017004619 | NLRC4 | 0.008510362 | CDS  |
| hsa-miR-520g-5p   | XM_017004619 | NLRC4 | 0.001727314 | CDS  |
| hsa-miR-520g-3p   | XM_017004619 | NLRC4 | 0.000108746 | 3UTR |
| hsa-miR-516b-5p   | XM_017004619 | NLRC4 | 0.05383761  | CDS  |
| hsa-miR-516b-3p   | XM_017004619 | NLRC4 | 0.000301215 | CDS  |
| hsa-miR-518e-5p   | XM_017004619 | NLRC4 | 0.004557198 | CDS  |
| hsa-miR-518e-5p   | XM_017004619 | NLRC4 | 0.001727314 | CDS  |
| hsa-miR-518e-5p   | XM_017004619 | NLRC4 | 1.11E-05    | CDS  |
| hsa-miR-518e-3p   | XM_017004619 | NLRC4 | 6.37E-06    | CDS  |
| hsa-miR-518e-3p   | XM_017004619 | NLRC4 | 2.59E-05    | CDS  |
| hsa-miR-518a-5p   | XM_017004619 | NLRC4 | 0.000116123 | CDS  |
| hsa-miR-518a-3p   | XM_017004619 | NLRC4 | 0.003793535 | CDS  |
| hsa-miR-518a-3p   | XM_017004619 | NLRC4 | 0.001815418 | CDS  |
| hsa-miR-518d-5p   | XM_017004619 | NLRC4 | 0.001727314 | CDS  |
| hsa-miR-518d-5p   | XM_017004619 | NLRC4 | 1.11E-05    | CDS  |
| hsa-miR-518d-3p   | XM_017004619 | NLRC4 | 6.37E-06    | CDS  |
| hsa-miR-517c-3p   | XM_017004619 | NLRC4 | 8.36E-05    | 3UTR |
| hsa-miR-522-5p    | XM_017004619 | NLRC4 | 0.004557198 | CDS  |
| hsa-miR-522-5p    | XM_017004619 | NLRC4 | 0.001727314 | CDS  |
| hsa-miR-522-5p    | XM_017004619 | NLRC4 | 1.11E-05    | CDS  |
| hsa-miR-522-3p    | XM_017004619 | NLRC4 | 0.01064677  | CDS  |
| hsa-miR-519a-5p   | XM_017004619 | NLRC4 | 0.004557198 | CDS  |
| hsa-miR-519a-5p   | XM_017004619 | NLRC4 | 0.001727314 | CDS  |
| hsa-miR-519a-5p   | XM_017004619 | NLRC4 | 1.11E-05    | CDS  |
| hsa-miR-519a-3p   | XM_017004619 | NLRC4 | 5.93E-05    | 3UTR |
| hsa-miR-527       | XM_017004619 | NLRC4 | 0.000116123 | CDS  |
| hsa-miR-516a-3p   | XM_017004619 | NLRC4 | 0.000301215 | CDS  |
| hsa-miR-519a-2-5p | XM_017004619 | NLRC4 | 5.22E-07    | CDS  |
| hsa-miR-519a-2-5p | XM_017004619 | NLRC4 | 0.001408827 | CDS  |
| hsa-miR-500a-5p   | XM_017004619 | NLRC4 | 0.009867866 | CDS  |
| hsa-miR-500a-3p   | XM_017004619 | NLRC4 | 0.000289672 | CDS  |
| hsa-miR-500a-3p   | XM_017004619 | NLRC4 | 0.008364013 | CDS  |
| hsa-miR-501-5p    | XM_017004619 | NLRC4 | 0.000535268 | CDS  |
| hsa-miR-501-3p    | XM_017004619 | NLRC4 | 4.19E-05    | CDS  |
| hsa-miR-502-5p    | XM_017004619 | NLRC4 | 0.000187665 | CDS  |
| hsa-miR-502-3p    | XM_017004619 | NLRC4 | 0.000289672 | CDS  |
| hsa-miR-502-3p    | XM_017004619 | NLRC4 | 0.1076955   | CDS  |
| hsa-miR-502-3p    | XM_017004619 | NLRC4 | 0.008364013 | CDS  |
| hsa-miR-450a-2-3p | XM_017004619 | NLRC4 | 0.000228869 | CDS  |
| hsa-miR-503-5p    | XM_017004619 | NLRC4 | 7.38E-06    | CDS  |
| hsa-miR-503-3p    | XM_017004619 | NLRC4 | 0.000511852 | CDS  |
| hsa-miR-504-5p    | XM_017004619 | NLRC4 | 1.82E-06    | CDS  |
| hsa-miR-504-5p    | XM_017004619 | NLRC4 | 0.000535268 | CDS  |
| hsa-miR-504-3p    | XM_017004619 | NLRC4 | 6.44E-05    | CDS  |

|                   |              |       |             |      |
|-------------------|--------------|-------|-------------|------|
| hsa-miR-504-3p    | XM_017004619 | NLRC4 | 0.08715581  | CDS  |
| hsa-miR-505-5p    | XM_017004619 | NLRC4 | 0.001077566 | 5UTR |
| hsa-miR-513a-5p   | XM_017004619 | NLRC4 | 1.11E-05    | CDS  |
| hsa-miR-513a-5p   | XM_017004619 | NLRC4 | 8.09E-07    | CDS  |
| hsa-miR-513a-3p   | XM_017004619 | NLRC4 | 2.06E-05    | CDS  |
| hsa-miR-506-3p    | XM_017004619 | NLRC4 | 6.37E-06    | CDS  |
| hsa-miR-506-3p    | XM_017004619 | NLRC4 | 0.000519135 | CDS  |
| hsa-miR-507       | XM_017004619 | NLRC4 | 0.00027781  | CDS  |
| hsa-miR-507       | XM_017004619 | NLRC4 | 0.1076955   | CDS  |
| hsa-miR-507       | XM_017004619 | NLRC4 | 7.01E-06    | CDS  |
| hsa-miR-508-5p    | XM_017004619 | NLRC4 | 1.11E-05    | CDS  |
| hsa-miR-508-5p    | XM_017004619 | NLRC4 | 7.38E-06    | CDS  |
| hsa-miR-508-3p    | XM_017004619 | NLRC4 | 0.000170577 | CDS  |
| hsa-miR-509-5p    | XM_017004619 | NLRC4 | 1.12E-06    | CDS  |
| hsa-miR-509-3p    | XM_017004619 | NLRC4 | 0.008722516 | CDS  |
| hsa-miR-510-5p    | XM_017004619 | NLRC4 | 6.14E-05    | CDS  |
| hsa-miR-510-5p    | XM_017004619 | NLRC4 | 0.01064963  | CDS  |
| hsa-miR-514a-5p   | XM_017004619 | NLRC4 | 0.02204899  | 5UTR |
| hsa-miR-514a-5p   | XM_017004619 | NLRC4 | 5.78E-07    | CDS  |
| hsa-miR-532-5p    | XM_017004619 | NLRC4 | 0.01297459  | 5UTR |
| hsa-miR-532-5p    | XM_017004619 | NLRC4 | 6.96E-05    | CDS  |
| hsa-miR-532-3p    | XM_017004619 | NLRC4 | 1.83E-05    | CDS  |
| hsa-miR-455-5p    | XM_017004619 | NLRC4 | 3.16E-05    | CDS  |
| hsa-miR-455-3p    | XM_017004619 | NLRC4 | 0.000334534 | CDS  |
| hsa-miR-455-3p    | XM_017004619 | NLRC4 | 6.02E-08    | CDS  |
| hsa-miR-455-3p    | XM_017004619 | NLRC4 | 1.46E-05    | CDS  |
| hsa-miR-376a-2-5p | XM_017004619 | NLRC4 | 0.00043678  | CDS  |
| hsa-miR-487b-5p   | XM_017004619 | NLRC4 | 0.01718499  | CDS  |
| hsa-miR-487b-5p   | XM_017004619 | NLRC4 | 0.003248269 | 5UTR |
| hsa-miR-487b-3p   | XM_017004619 | NLRC4 | 0.008906653 | CDS  |
| hsa-miR-551a      | XM_017004619 | NLRC4 | 9.54E-06    | CDS  |
| hsa-miR-551a      | XM_017004619 | NLRC4 | 0.000469601 | 3UTR |
| hsa-miR-552-3p    | XM_017004619 | NLRC4 | 0.00107409  | CDS  |
| hsa-miR-554       | XM_017004619 | NLRC4 | 6.75E-05    | CDS  |
| hsa-miR-554       | XM_017004619 | NLRC4 | 6.41E-06    | CDS  |
| hsa-miR-554       | XM_017004619 | NLRC4 | 0.01194815  | CDS  |
| hsa-miR-92b-5p    | XM_017004619 | NLRC4 | 1.24E-05    | CDS  |
| hsa-miR-555       | XM_017004619 | NLRC4 | 0.000121209 | CDS  |
| hsa-miR-557       | XM_017004619 | NLRC4 | 0.0101559   | CDS  |
| hsa-miR-557       | XM_017004619 | NLRC4 | 8.86E-07    | CDS  |
| hsa-miR-557       | XM_017004619 | NLRC4 | 0.000372447 | CDS  |
| hsa-miR-564       | XM_017004619 | NLRC4 | 4.24E-05    | CDS  |
| hsa-miR-564       | XM_017004619 | NLRC4 | 0.02165254  | CDS  |
| hsa-miR-551b-5p   | XM_017004619 | NLRC4 | 0.001006519 | CDS  |

|                 |              |       |             |      |
|-----------------|--------------|-------|-------------|------|
| hsa-miR-572     | XM_017004619 | NLRC4 | 5.54E-06    | CDS  |
| hsa-miR-572     | XM_017004619 | NLRC4 | 7.28E-06    | CDS  |
| hsa-miR-572     | XM_017004619 | NLRC4 | 1.77E-06    | CDS  |
| hsa-miR-573     | XM_017004619 | NLRC4 | 0.006635339 | CDS  |
| hsa-miR-574-5p  | XM_017004619 | NLRC4 | 0.05606478  | CDS  |
| hsa-miR-575     | XM_017004619 | NLRC4 | 0.000132382 | CDS  |
| hsa-miR-575     | XM_017004619 | NLRC4 | 0.005855153 | CDS  |
| hsa-miR-578     | XM_017004619 | NLRC4 | 0.000352314 | CDS  |
| hsa-miR-579-5p  | XM_017004619 | NLRC4 | 0.001114676 | CDS  |
| hsa-miR-580-5p  | XM_017004619 | NLRC4 | 1.59E-05    | 3UTR |
| hsa-miR-581     | XM_017004619 | NLRC4 | 0.0115983   | 5UTR |
| hsa-miR-583     | XM_017004619 | NLRC4 | 0.000795975 | CDS  |
| hsa-miR-584-3p  | XM_017004619 | NLRC4 | 0.000112833 | CDS  |
| hsa-miR-586     | XM_017004619 | NLRC4 | 0.000326687 | CDS  |
| hsa-miR-587     | XM_017004619 | NLRC4 | 0.000121627 | CDS  |
| hsa-miR-587     | XM_017004619 | NLRC4 | 0.001872601 | CDS  |
| hsa-miR-587     | XM_017004619 | NLRC4 | 0.00120872  | CDS  |
| hsa-miR-588     | XM_017004619 | NLRC4 | 0.001503355 | CDS  |
| hsa-miR-588     | XM_017004619 | NLRC4 | 6.22E-05    | CDS  |
| hsa-miR-588     | XM_017004619 | NLRC4 | 1.60E-06    | CDS  |
| hsa-miR-588     | XM_017004619 | NLRC4 | 0.001121191 | CDS  |
| hsa-miR-589-5p  | XM_017004619 | NLRC4 | 1.04E-05    | CDS  |
| hsa-miR-589-3p  | XM_017004619 | NLRC4 | 0.01416172  | 3UTR |
| hsa-miR-550a-5p | XM_017004619 | NLRC4 | 0.07065603  | CDS  |
| hsa-miR-550a-5p | XM_017004619 | NLRC4 | 0.000153631 | CDS  |
| hsa-miR-550a-5p | XM_017004619 | NLRC4 | 0.000133333 | CDS  |
| hsa-miR-550a-5p | XM_017004619 | NLRC4 | 0.000671559 | CDS  |
| hsa-miR-550a-3p | XM_017004619 | NLRC4 | 7.08E-06    | CDS  |
| hsa-miR-550a-3p | XM_017004619 | NLRC4 | 1.22E-05    | CDS  |
| hsa-miR-550a-3p | XM_017004619 | NLRC4 | 0.009171114 | CDS  |
| hsa-miR-550a-3p | XM_017004619 | NLRC4 | 3.70E-05    | CDS  |
| hsa-miR-590-5p  | XM_017004619 | NLRC4 | 0.000129339 | CDS  |
| hsa-miR-593-5p  | XM_017004619 | NLRC4 | 6.98E-06    | CDS  |
| hsa-miR-593-5p  | XM_017004619 | NLRC4 | 5.85E-06    | CDS  |
| hsa-miR-593-5p  | XM_017004619 | NLRC4 | 5.66E-06    | CDS  |
| hsa-miR-593-3p  | XM_017004619 | NLRC4 | 1.82E-05    | CDS  |
| hsa-miR-593-3p  | XM_017004619 | NLRC4 | 6.96E-05    | CDS  |
| hsa-miR-593-3p  | XM_017004619 | NLRC4 | 7.53E-05    | CDS  |
| hsa-miR-595     | XM_017004619 | NLRC4 | 0.000445653 | CDS  |
| hsa-miR-595     | XM_017004619 | NLRC4 | 7.08E-06    | CDS  |
| hsa-miR-595     | XM_017004619 | NLRC4 | 7.55E-05    | CDS  |
| hsa-miR-596     | XM_017004619 | NLRC4 | 6.12E-05    | 3UTR |
| hsa-miR-596     | XM_017004619 | NLRC4 | 1.05E-05    | CDS  |
| hsa-miR-597-5p  | XM_017004619 | NLRC4 | 4.30E-06    | CDS  |

|                |              |       |             |      |
|----------------|--------------|-------|-------------|------|
| hsa-miR-597-3p | XM_017004619 | NLRC4 | 0.001064408 | CDS  |
| hsa-miR-598-5p | XM_017004619 | NLRC4 | 0.01194815  | CDS  |
| hsa-miR-598-5p | XM_017004619 | NLRC4 | 0.003248269 | 5UTR |
| hsa-miR-600    | XM_017004619 | NLRC4 | 0.000172094 | CDS  |
| hsa-miR-600    | XM_017004619 | NLRC4 | 0.000926972 | CDS  |
| hsa-miR-601    | XM_017004619 | NLRC4 | 0.002365478 | CDS  |
| hsa-miR-604    | XM_017004619 | NLRC4 | 1.77E-06    | CDS  |
| hsa-miR-605-5p | XM_017004619 | NLRC4 | 0.000583201 | CDS  |
| hsa-miR-608    | XM_017004619 | NLRC4 | 0.05045639  | CDS  |
| hsa-miR-609    | XM_017004619 | NLRC4 | 0.001262872 | CDS  |
| hsa-miR-609    | XM_017004619 | NLRC4 | 0.000119411 | CDS  |
| hsa-miR-610    | XM_017004619 | NLRC4 | 0.000271137 | CDS  |
| hsa-miR-611    | XM_017004619 | NLRC4 | 0.00043678  | CDS  |
| hsa-miR-611    | XM_017004619 | NLRC4 | 1.85E-05    | CDS  |
| hsa-miR-611    | XM_017004619 | NLRC4 | 9.54E-06    | CDS  |
| hsa-miR-611    | XM_017004619 | NLRC4 | 1.88E-05    | CDS  |
| hsa-miR-612    | XM_017004619 | NLRC4 | 4.41E-05    | CDS  |
| hsa-miR-612    | XM_017004619 | NLRC4 | 0.001914154 | CDS  |
| hsa-miR-614    | XM_017004619 | NLRC4 | 0.06684233  | CDS  |
| hsa-miR-614    | XM_017004619 | NLRC4 | 3.90E-05    | CDS  |
| hsa-miR-614    | XM_017004619 | NLRC4 | 8.56E-06    | CDS  |
| hsa-miR-615-5p | XM_017004619 | NLRC4 | 4.59E-05    | CDS  |
| hsa-miR-615-5p | XM_017004619 | NLRC4 | 0.000511852 | CDS  |
| hsa-miR-615-5p | XM_017004619 | NLRC4 | 2.40E-05    | 3UTR |
| hsa-miR-615-5p | XM_017004619 | NLRC4 | 1.36E-05    | 3UTR |
| hsa-miR-615-3p | XM_017004619 | NLRC4 | 1.92E-05    | CDS  |
| hsa-miR-616-5p | XM_017004619 | NLRC4 | 0.002217478 | CDS  |
| hsa-miR-616-3p | XM_017004619 | NLRC4 | 0.0262907   | CDS  |
| hsa-miR-616-3p | XM_017004619 | NLRC4 | 0.002052023 | CDS  |
| hsa-miR-618    | XM_017004619 | NLRC4 | 0.00561403  | CDS  |
| hsa-miR-619-5p | XM_017004619 | NLRC4 | 1.12E-06    | CDS  |
| hsa-miR-619-3p | XM_017004619 | NLRC4 | 0.01060954  | 5UTR |
| hsa-miR-619-3p | XM_017004619 | NLRC4 | 0.000406814 | CDS  |
| hsa-miR-622    | XM_017004619 | NLRC4 | 0.001445108 | CDS  |
| hsa-miR-622    | XM_017004619 | NLRC4 | 0.00107409  | CDS  |
| hsa-miR-623    | XM_017004619 | NLRC4 | 0.006055493 | CDS  |
| hsa-miR-623    | XM_017004619 | NLRC4 | 0.000239915 | CDS  |
| hsa-miR-624-5p | XM_017004619 | NLRC4 | 1.70E-05    | 5UTR |
| hsa-miR-625-5p | XM_017004619 | NLRC4 | 0.000795975 | CDS  |
| hsa-miR-626    | XM_017004619 | NLRC4 | 0.03794919  | CDS  |
| hsa-miR-627-3p | XM_017004619 | NLRC4 | 0.000236112 | 5UTR |
| hsa-miR-629-3p | XM_017004619 | NLRC4 | 0.000116174 | CDS  |
| hsa-miR-630    | XM_017004619 | NLRC4 | 0.000469993 | CDS  |
| hsa-miR-631    | XM_017004619 | NLRC4 | 4.87E-05    | 3UTR |

|                 |              |       |             |      |
|-----------------|--------------|-------|-------------|------|
| hsa-miR-33b-5p  | XM_017004619 | NLRC4 | 2.92E-05    | CDS  |
| hsa-miR-33b-3p  | XM_017004619 | NLRC4 | 0.000108746 | 3UTR |
| hsa-miR-33b-3p  | XM_017004619 | NLRC4 | 2.73E-06    | CDS  |
| hsa-miR-632     | XM_017004619 | NLRC4 | 0.00661909  | CDS  |
| hsa-miR-635     | XM_017004619 | NLRC4 | 0.000107277 | CDS  |
| hsa-miR-637     | XM_017004619 | NLRC4 | 9.62E-07    | CDS  |
| hsa-miR-639     | XM_017004619 | NLRC4 | 0.01340961  | CDS  |
| hsa-miR-640     | XM_017004619 | NLRC4 | 0.000411356 | 3UTR |
| hsa-miR-642a-5p | XM_017004619 | NLRC4 | 0.000475498 | CDS  |
| hsa-miR-642a-3p | XM_017004619 | NLRC4 | 0.003190413 | CDS  |
| hsa-miR-644a    | XM_017004619 | NLRC4 | 3.82E-05    | CDS  |
| hsa-miR-645     | XM_017004619 | NLRC4 | 0.03159106  | CDS  |
| hsa-miR-646     | XM_017004619 | NLRC4 | 0.009935842 | CDS  |
| hsa-miR-649     | XM_017004619 | NLRC4 | 0.00372152  | CDS  |
| hsa-miR-652-5p  | XM_017004619 | NLRC4 | 3.41E-06    | CDS  |
| hsa-miR-652-5p  | XM_017004619 | NLRC4 | 0.002217478 | CDS  |
| hsa-miR-652-3p  | XM_017004619 | NLRC4 | 9.56E-06    | CDS  |
| hsa-miR-661     | XM_017004619 | NLRC4 | 2.92E-05    | CDS  |
| hsa-miR-661     | XM_017004619 | NLRC4 | 0.004730357 | CDS  |
| hsa-miR-662     | XM_017004619 | NLRC4 | 4.84E-07    | CDS  |
| hsa-miR-662     | XM_017004619 | NLRC4 | 1.08E-05    | CDS  |
| hsa-miR-662     | XM_017004619 | NLRC4 | 3.50E-05    | CDS  |
| hsa-miR-663a    | XM_017004619 | NLRC4 | 1.00E-06    | CDS  |
| hsa-miR-663a    | XM_017004619 | NLRC4 | 2.10E-06    | CDS  |
| hsa-miR-449b-5p | XM_017004619 | NLRC4 | 9.79E-05    | CDS  |
| hsa-miR-654-5p  | XM_017004619 | NLRC4 | 0.002815688 | CDS  |
| hsa-miR-654-5p  | XM_017004619 | NLRC4 | 5.49E-05    | CDS  |
| hsa-miR-654-3p  | XM_017004619 | NLRC4 | 0.000235004 | CDS  |
| hsa-miR-655-5p  | XM_017004619 | NLRC4 | 5.97E-06    | CDS  |
| hsa-miR-656-5p  | XM_017004619 | NLRC4 | 0.00498711  | CDS  |
| hsa-miR-656-5p  | XM_017004619 | NLRC4 | 0.006198772 | CDS  |
| hsa-miR-549a-5p | XM_017004619 | NLRC4 | 0.000129339 | CDS  |
| hsa-miR-549a-5p | XM_017004619 | NLRC4 | 0.000953849 | CDS  |
| hsa-miR-657     | XM_017004619 | NLRC4 | 7.45E-06    | CDS  |
| hsa-miR-658     | XM_017004619 | NLRC4 | 0.003824517 | CDS  |
| hsa-miR-659-3p  | XM_017004619 | NLRC4 | 0.04526314  | CDS  |
| hsa-miR-659-3p  | XM_017004619 | NLRC4 | 0.000267696 | CDS  |
| hsa-miR-660-5p  | XM_017004619 | NLRC4 | 0.000159806 | CDS  |
| hsa-miR-660-3p  | XM_017004619 | NLRC4 | 1.83E-05    | 3UTR |
| hsa-miR-660-3p  | XM_017004619 | NLRC4 | 0.001022618 | CDS  |
| hsa-miR-660-3p  | XM_017004619 | NLRC4 | 0.03271231  | CDS  |
| hsa-miR-542-5p  | XM_017004619 | NLRC4 | 0.000511852 | CDS  |
| hsa-miR-542-5p  | XM_017004619 | NLRC4 | 0.005514936 | CDS  |
| hsa-miR-758-5p  | XM_017004619 | NLRC4 | 1.36E-05    | 3UTR |



|                   |              |       |             |      |
|-------------------|--------------|-------|-------------|------|
| hsa-miR-758-3p    | XM_017004619 | NLRC4 | 0.000123515 | CDS  |
| hsa-miR-671-5p    | XM_017004619 | NLRC4 | 4.59E-05    | CDS  |
| hsa-miR-671-5p    | XM_017004619 | NLRC4 | 0.000671559 | CDS  |
| hsa-miR-671-3p    | XM_017004619 | NLRC4 | 5.45E-06    | CDS  |
| hsa-miR-671-3p    | XM_017004619 | NLRC4 | 1.92E-05    | CDS  |
| hsa-miR-668-5p    | XM_017004619 | NLRC4 | 4.30E-06    | CDS  |
| hsa-miR-668-5p    | XM_017004619 | NLRC4 | 0.006396492 | CDS  |
| hsa-miR-668-3p    | XM_017004619 | NLRC4 | 0.000406012 | 3UTR |
| hsa-miR-668-3p    | XM_017004619 | NLRC4 | 5.97E-06    | CDS  |
| hsa-miR-550a-3-5p | XM_017004619 | NLRC4 | 2.73E-06    | CDS  |
| hsa-miR-767-5p    | XM_017004619 | NLRC4 | 0.1076955   | CDS  |
| hsa-miR-767-5p    | XM_017004619 | NLRC4 | 0.000241535 | CDS  |
| hsa-miR-767-3p    | XM_017004619 | NLRC4 | 3.43E-05    | 3UTR |
| hsa-miR-1224-5p   | XM_017004619 | NLRC4 | 0.01527382  | 5UTR |
| hsa-miR-1224-3p   | XM_017004619 | NLRC4 | 0.000612062 | CDS  |
| hsa-miR-151b      | XM_017004619 | NLRC4 | 0.001239845 | CDS  |
| hsa-miR-320b      | XM_017004619 | NLRC4 | 4.24E-05    | CDS  |
| hsa-miR-320b      | XM_017004619 | NLRC4 | 0.004588791 | CDS  |
| hsa-miR-1296-5p   | XM_017004619 | NLRC4 | 0.001661235 | CDS  |
| hsa-miR-1296-5p   | XM_017004619 | NLRC4 | 6.65E-06    | CDS  |
| hsa-miR-1296-5p   | XM_017004619 | NLRC4 | 1.35E-05    | CDS  |
| hsa-miR-1296-3p   | XM_017004619 | NLRC4 | 2.06E-05    | CDS  |
| hsa-miR-1296-3p   | XM_017004619 | NLRC4 | 0.01634487  | 5UTR |
| hsa-miR-1468-5p   | XM_017004619 | NLRC4 | 0.000369226 | 3UTR |
| hsa-miR-1468-5p   | XM_017004619 | NLRC4 | 0.000719145 | CDS  |
| hsa-miR-1271-3p   | XM_017004619 | NLRC4 | 0.000275082 | 3UTR |
| hsa-miR-1271-3p   | XM_017004619 | NLRC4 | 7.25E-06    | CDS  |
| hsa-miR-1271-3p   | XM_017004619 | NLRC4 | 6.75E-05    | CDS  |
| hsa-miR-1301-5p   | XM_017004619 | NLRC4 | 6.58E-06    | CDS  |
| hsa-miR-1301-5p   | XM_017004619 | NLRC4 | 7.82E-05    | CDS  |
| hsa-miR-1301-3p   | XM_017004619 | NLRC4 | 3.55E-05    | CDS  |
| hsa-miR-1301-3p   | XM_017004619 | NLRC4 | 0.000165293 | CDS  |
| hsa-miR-449c-5p   | XM_017004619 | NLRC4 | 9.79E-05    | CDS  |
| hsa-miR-449c-5p   | XM_017004619 | NLRC4 | 5.17E-05    | CDS  |
| hsa-miR-449c-3p   | XM_017004619 | NLRC4 | 0.000584143 | CDS  |
| hsa-miR-1283      | XM_017004619 | NLRC4 | 0.002143507 | CDS  |
| hsa-miR-769-5p    | XM_017004619 | NLRC4 | 0.000125663 | CDS  |
| hsa-miR-769-5p    | XM_017004619 | NLRC4 | 0.01390878  | CDS  |
| hsa-miR-769-3p    | XM_017004619 | NLRC4 | 1.96E-05    | CDS  |
| hsa-miR-769-3p    | XM_017004619 | NLRC4 | 0.005273831 | CDS  |
| hsa-miR-766-3p    | XM_017004619 | NLRC4 | 1.56E-05    | CDS  |
| hsa-miR-378d      | XM_017004619 | NLRC4 | 0.003596187 | CDS  |
| hsa-miR-1185-1-3p | XM_017004619 | NLRC4 | 0.000865576 | CDS  |
| hsa-miR-762       | XM_017004619 | NLRC4 | 3.17E-07    | CDS  |

|                 |              |       |             |      |
|-----------------|--------------|-------|-------------|------|
| hsa-miR-762     | XM_017004619 | NLRC4 | 0.000608953 | CDS  |
| hsa-miR-762     | XM_017004619 | NLRC4 | 0.000133333 | CDS  |
| hsa-miR-802     | XM_017004619 | NLRC4 | 0.001836158 | CDS  |
| hsa-miR-670-5p  | XM_017004619 | NLRC4 | 0.05124352  | CDS  |
| hsa-miR-1298-3p | XM_017004619 | NLRC4 | 6.05E-07    | CDS  |
| hsa-miR-1298-3p | XM_017004619 | NLRC4 | 0.2724825   | CDS  |
| hsa-miR-2113    | XM_017004619 | NLRC4 | 0.02338689  | CDS  |
| hsa-miR-761     | XM_017004619 | NLRC4 | 0.006362695 | CDS  |
| hsa-miR-761     | XM_017004619 | NLRC4 | 6.02E-08    | CDS  |
| hsa-miR-764     | XM_017004619 | NLRC4 | 0.000645022 | 3UTR |
| hsa-miR-764     | XM_017004619 | NLRC4 | 9.54E-06    | CDS  |
| hsa-miR-675-5p  | XM_017004619 | NLRC4 | 5.49E-05    | CDS  |
| hsa-miR-675-5p  | XM_017004619 | NLRC4 | 0.000345859 | CDS  |
| hsa-miR-675-5p  | XM_017004619 | NLRC4 | 0.01181189  | CDS  |
| hsa-miR-675-3p  | XM_017004619 | NLRC4 | 0.009187106 | CDS  |
| hsa-miR-298     | XM_017004619 | NLRC4 | 0.000147956 | CDS  |
| hsa-miR-298     | XM_017004619 | NLRC4 | 0.00091255  | CDS  |
| hsa-miR-892a    | XM_017004619 | NLRC4 | 0.00329055  | CDS  |
| hsa-miR-892a    | XM_017004619 | NLRC4 | 4.11E-05    | 3UTR |
| hsa-miR-874-3p  | XM_017004619 | NLRC4 | 4.84E-07    | CDS  |
| hsa-miR-888-5p  | XM_017004619 | NLRC4 | 8.94E-05    | CDS  |
| hsa-miR-892b    | XM_017004619 | NLRC4 | 0.01837384  | CDS  |
| hsa-miR-541-5p  | XM_017004619 | NLRC4 | 0.06982729  | CDS  |
| hsa-miR-541-5p  | XM_017004619 | NLRC4 | 0.01507619  | CDS  |
| hsa-miR-541-3p  | XM_017004619 | NLRC4 | 0.00842643  | CDS  |
| hsa-miR-889-5p  | XM_017004619 | NLRC4 | 5.30E-07    | CDS  |
| hsa-miR-875-5p  | XM_017004619 | NLRC4 | 2.31E-05    | CDS  |
| hsa-miR-876-5p  | XM_017004619 | NLRC4 | 0.01472951  | CDS  |
| hsa-miR-708-5p  | XM_017004619 | NLRC4 | 0.001633284 | CDS  |
| hsa-miR-708-5p  | XM_017004619 | NLRC4 | 3.69E-06    | CDS  |
| hsa-miR-708-3p  | XM_017004619 | NLRC4 | 0.000479692 | CDS  |
| hsa-miR-147b-5p | XM_017004619 | NLRC4 | 0.002573208 | CDS  |
| hsa-miR-147b-3p | XM_017004619 | NLRC4 | 9.72E-05    | CDS  |
| hsa-miR-744-5p  | XM_017004619 | NLRC4 | 0.001670142 | CDS  |
| hsa-miR-744-5p  | XM_017004619 | NLRC4 | 1.19E-06    | CDS  |
| hsa-miR-885-3p  | XM_017004619 | NLRC4 | 0.00237631  | CDS  |
| hsa-miR-885-3p  | XM_017004619 | NLRC4 | 0.00177024  | CDS  |
| hsa-miR-877-3p  | XM_017004619 | NLRC4 | 0.000369226 | 3UTR |
| hsa-miR-877-3p  | XM_017004619 | NLRC4 | 0.000583201 | CDS  |
| hsa-miR-877-3p  | XM_017004619 | NLRC4 | 0.000475498 | CDS  |
| hsa-miR-887-5p  | XM_017004619 | NLRC4 | 8.80E-06    | CDS  |
| hsa-miR-887-5p  | XM_017004619 | NLRC4 | 0.001633284 | CDS  |
| hsa-miR-665     | XM_017004619 | NLRC4 | 0.000146875 | CDS  |
| hsa-miR-873-3p  | XM_017004619 | NLRC4 | 0.02490019  | CDS  |

|                  |              |       |             |      |
|------------------|--------------|-------|-------------|------|
| hsa-miR-873-3p   | XM_017004619 | NLRC4 | 0.005860441 | CDS  |
| hsa-miR-374b-3p  | XM_017004619 | NLRC4 | 0.003864711 | CDS  |
| hsa-miR-760      | XM_017004619 | NLRC4 | 4.06E-07    | CDS  |
| hsa-miR-760      | XM_017004619 | NLRC4 | 4.84E-07    | CDS  |
| hsa-miR-301b-5p  | XM_017004619 | NLRC4 | 1.10E-08    | CDS  |
| hsa-miR-216b-3p  | XM_017004619 | NLRC4 | 0.008364013 | CDS  |
| hsa-miR-920      | XM_017004619 | NLRC4 | 0.001239845 | CDS  |
| hsa-miR-920      | XM_017004619 | NLRC4 | 0.0264118   | CDS  |
| hsa-miR-921      | XM_017004619 | NLRC4 | 0.0220862   | 5UTR |
| hsa-miR-922      | XM_017004619 | NLRC4 | 0.006362695 | CDS  |
| hsa-miR-924      | XM_017004619 | NLRC4 | 5.47E-05    | CDS  |
| hsa-miR-924      | XM_017004619 | NLRC4 | 0.002209893 | CDS  |
| hsa-miR-509-3-5p | XM_017004619 | NLRC4 | 1.23E-05    | CDS  |
| hsa-miR-933      | XM_017004619 | NLRC4 | 7.53E-05    | CDS  |
| hsa-miR-933      | XM_017004619 | NLRC4 | 0.005103181 | CDS  |
| hsa-miR-936      | XM_017004619 | NLRC4 | 0.004898831 | CDS  |
| hsa-miR-937-5p   | XM_017004619 | NLRC4 | 6.02E-08    | CDS  |
| hsa-miR-937-5p   | XM_017004619 | NLRC4 | 0.05019859  | CDS  |
| hsa-miR-938      | XM_017004619 | NLRC4 | 0.001864512 | 5UTR |
| hsa-miR-939-5p   | XM_017004619 | NLRC4 | 3.17E-07    | CDS  |
| hsa-miR-939-5p   | XM_017004619 | NLRC4 | 0.000608953 | CDS  |
| hsa-miR-939-3p   | XM_017004619 | NLRC4 | 7.16E-06    | CDS  |
| hsa-miR-939-3p   | XM_017004619 | NLRC4 | 0.00014298  | CDS  |
| hsa-miR-940      | XM_017004619 | NLRC4 | 0.02490019  | CDS  |
| hsa-miR-941      | XM_017004619 | NLRC4 | 0.000347827 | CDS  |
| hsa-miR-941      | XM_017004619 | NLRC4 | 4.19E-05    | CDS  |
| hsa-miR-942-5p   | XM_017004619 | NLRC4 | 0.000369226 | 3UTR |
| hsa-miR-1178-5p  | XM_017004619 | NLRC4 | 0.000441636 | CDS  |
| hsa-miR-1178-3p  | XM_017004619 | NLRC4 | 8.10E-07    | CDS  |
| hsa-miR-1180-5p  | XM_017004619 | NLRC4 | 7.28E-06    | CDS  |
| hsa-miR-1181     | XM_017004619 | NLRC4 | 0.000337721 | 3UTR |
| hsa-miR-1181     | XM_017004619 | NLRC4 | 0.008579731 | CDS  |
| hsa-miR-1182     | XM_017004619 | NLRC4 | 0.000671559 | CDS  |
| hsa-miR-1182     | XM_017004619 | NLRC4 | 0.004035133 | CDS  |
| hsa-miR-1183     | XM_017004619 | NLRC4 | 9.39E-05    | CDS  |
| hsa-miR-1183     | XM_017004619 | NLRC4 | 2.57E-05    | CDS  |
| hsa-miR-1183     | XM_017004619 | NLRC4 | 1.23E-05    | CDS  |
| hsa-miR-1183     | XM_017004619 | NLRC4 | 0.000566436 | CDS  |
| hsa-miR-1184     | XM_017004619 | NLRC4 | 1.92E-05    | CDS  |
| hsa-miR-1225-5p  | XM_017004619 | NLRC4 | 0.000281735 | CDS  |
| hsa-miR-1225-3p  | XM_017004619 | NLRC4 | 0.006223583 | CDS  |
| hsa-miR-1225-3p  | XM_017004619 | NLRC4 | 8.56E-06    | CDS  |
| hsa-miR-1226-5p  | XM_017004619 | NLRC4 | 0.000293001 | CDS  |
| hsa-miR-1227-5p  | XM_017004619 | NLRC4 | 2.28E-05    | CDS  |

|                 |              |       |             |      |
|-----------------|--------------|-------|-------------|------|
| hsa-miR-1227-5p | XM_017004619 | NLRC4 | 0.01108732  | CDS  |
| hsa-miR-1227-5p | XM_017004619 | NLRC4 | 5.97E-06    | CDS  |
| hsa-miR-1228-5p | XM_017004619 | NLRC4 | 0.000799382 | CDS  |
| hsa-miR-1228-3p | XM_017004619 | NLRC4 | 0.000369226 | 3UTR |
| hsa-miR-1229-5p | XM_017004619 | NLRC4 | 1.00E-06    | CDS  |
| hsa-miR-1229-5p | XM_017004619 | NLRC4 | 0.000133333 | CDS  |
| hsa-miR-1231    | XM_017004619 | NLRC4 | 0.000799382 | CDS  |
| hsa-miR-1231    | XM_017004619 | NLRC4 | 0.007684299 | CDS  |
| hsa-miR-1233-5p | XM_017004619 | NLRC4 | 1.85E-05    | CDS  |
| hsa-miR-1233-5p | XM_017004619 | NLRC4 | 4.98E-06    | CDS  |
| hsa-miR-1233-5p | XM_017004619 | NLRC4 | 0.02230438  | CDS  |
| hsa-miR-1233-5p | XM_017004619 | NLRC4 | 0.000276588 | 5UTR |
| hsa-miR-1233-3p | XM_017004619 | NLRC4 | 7.68E-06    | CDS  |
| hsa-miR-1233-3p | XM_017004619 | NLRC4 | 1.53E-05    | CDS  |
| hsa-miR-1234-3p | XM_017004619 | NLRC4 | 0.000112833 | CDS  |
| hsa-miR-1236-5p | XM_017004619 | NLRC4 | 0.000535509 | CDS  |
| hsa-miR-1236-3p | XM_017004619 | NLRC4 | 0.000259323 | CDS  |
| hsa-miR-1236-3p | XM_017004619 | NLRC4 | 0.000475498 | CDS  |
| hsa-miR-1237-5p | XM_017004619 | NLRC4 | 9.25E-07    | CDS  |
| hsa-miR-1237-5p | XM_017004619 | NLRC4 | 1.33E-07    | CDS  |
| hsa-miR-1237-3p | XM_017004619 | NLRC4 | 0.0210857   | CDS  |
| hsa-miR-1237-3p | XM_017004619 | NLRC4 | 0.01276016  | CDS  |
| hsa-miR-1238-5p | XM_017004619 | NLRC4 | 2.59E-05    | CDS  |
| hsa-miR-1200    | XM_017004619 | NLRC4 | 0.01928178  | CDS  |
| hsa-miR-1202    | XM_017004619 | NLRC4 | 6.57E-06    | CDS  |
| hsa-miR-1202    | XM_017004619 | NLRC4 | 0.000671559 | CDS  |
| hsa-miR-1202    | XM_017004619 | NLRC4 | 1.12E-05    | CDS  |
| hsa-miR-1202    | XM_017004619 | NLRC4 | 0.001466882 | CDS  |
| hsa-miR-1203    | XM_017004619 | NLRC4 | 0.001218159 | CDS  |
| hsa-miR-1203    | XM_017004619 | NLRC4 | 4.98E-06    | CDS  |
| hsa-miR-663b    | XM_017004619 | NLRC4 | 1.91E-05    | CDS  |
| hsa-miR-663b    | XM_017004619 | NLRC4 | 5.47E-06    | CDS  |
| hsa-miR-663b    | XM_017004619 | NLRC4 | 2.40E-05    | 3UTR |
| hsa-miR-1204    | XM_017004619 | NLRC4 | 1.16E-05    | CDS  |
| hsa-miR-1205    | XM_017004619 | NLRC4 | 2.13E-05    | CDS  |
| hsa-miR-1207-5p | XM_017004619 | NLRC4 | 1.85E-05    | CDS  |
| hsa-miR-1207-5p | XM_017004619 | NLRC4 | 0.000133333 | CDS  |
| hsa-miR-1208    | XM_017004619 | NLRC4 | 0.000913506 | CDS  |
| hsa-miR-1208    | XM_017004619 | NLRC4 | 0.000469993 | CDS  |
| hsa-miR-1285-5p | XM_017004619 | NLRC4 | 2.60E-05    | 3UTR |
| hsa-miR-1285-3p | XM_017004619 | NLRC4 | 0.02595679  | CDS  |
| hsa-miR-1285-3p | XM_017004619 | NLRC4 | 8.80E-06    | CDS  |
| hsa-miR-1285-3p | XM_017004619 | NLRC4 | 3.03E-05    | CDS  |
| hsa-miR-1286    | XM_017004619 | NLRC4 | 0.000496463 | CDS  |

|                 |              |       |             |      |
|-----------------|--------------|-------|-------------|------|
| hsa-miR-1286    | XM_017004619 | NLRC4 | 0.007362526 | CDS  |
| hsa-miR-1286    | XM_017004619 | NLRC4 | 0.001014772 | CDS  |
| hsa-miR-1287-5p | XM_017004619 | NLRC4 | 0.000308712 | CDS  |
| hsa-miR-1287-5p | XM_017004619 | NLRC4 | 0.02496616  | 5UTR |
| hsa-miR-1287-3p | XM_017004619 | NLRC4 | 1.56E-05    | CDS  |
| hsa-miR-1289    | XM_017004619 | NLRC4 | 0.000478711 | CDS  |
| hsa-miR-1289    | XM_017004619 | NLRC4 | 0.01176218  | CDS  |
| hsa-miR-1290    | XM_017004619 | NLRC4 | 0.01767896  | CDS  |
| hsa-miR-1290    | XM_017004619 | NLRC4 | 0.1541459   | CDS  |
| hsa-miR-1291    | XM_017004619 | NLRC4 | 0.001025993 | CDS  |
| hsa-miR-1293    | XM_017004619 | NLRC4 | 0.01861651  | CDS  |
| hsa-miR-1293    | XM_017004619 | NLRC4 | 3.17E-07    | CDS  |
| hsa-miR-1294    | XM_017004619 | NLRC4 | 8.35E-05    | CDS  |
| hsa-miR-1294    | XM_017004619 | NLRC4 | 0.001710859 | CDS  |
| hsa-miR-1299    | XM_017004619 | NLRC4 | 1.81E-05    | CDS  |
| hsa-miR-1299    | XM_017004619 | NLRC4 | 0.04943221  | CDS  |
| hsa-miR-1299    | XM_017004619 | NLRC4 | 0.09490789  | CDS  |
| hsa-miR-1299    | XM_017004619 | NLRC4 | 0.005607985 | 5UTR |
| hsa-miR-1303    | XM_017004619 | NLRC4 | 0.000260618 | CDS  |
| hsa-miR-1303    | XM_017004619 | NLRC4 | 0.000214933 | CDS  |
| hsa-miR-1304-5p | XM_017004619 | NLRC4 | 5.56E-06    | CDS  |
| hsa-miR-1304-5p | XM_017004619 | NLRC4 | 0.01135737  | CDS  |
| hsa-miR-1304-3p | XM_017004619 | NLRC4 | 0.000107543 | CDS  |
| hsa-miR-1245a   | XM_017004619 | NLRC4 | 1.31E-05    | 3UTR |
| hsa-miR-1245a   | XM_017004619 | NLRC4 | 1.04E-05    | 5UTR |
| hsa-miR-1246    | XM_017004619 | NLRC4 | 0.1541459   | CDS  |
| hsa-miR-1246    | XM_017004619 | NLRC4 | 0.000724533 | CDS  |
| hsa-miR-1246    | XM_017004619 | NLRC4 | 0.01767896  | CDS  |
| hsa-miR-1248    | XM_017004619 | NLRC4 | 0.000493929 | CDS  |
| hsa-miR-1249-5p | XM_017004619 | NLRC4 | 0.05553747  | CDS  |
| hsa-miR-1250-5p | XM_017004619 | NLRC4 | 0.006122178 | CDS  |
| hsa-miR-1250-3p | XM_017004619 | NLRC4 | 4.89E-06    | CDS  |
| hsa-miR-1251-5p | XM_017004619 | NLRC4 | 1.56E-05    | CDS  |
| hsa-miR-1251-3p | XM_017004619 | NLRC4 | 1.08E-05    | CDS  |
| hsa-miR-1253    | XM_017004619 | NLRC4 | 0.001088706 | CDS  |
| hsa-miR-1257    | XM_017004619 | NLRC4 | 0.000535509 | CDS  |
| hsa-miR-1260a   | XM_017004619 | NLRC4 | 1.12E-05    | CDS  |
| hsa-miR-1261    | XM_017004619 | NLRC4 | 0.000977407 | CDS  |
| hsa-miR-1263    | XM_017004619 | NLRC4 | 0.001064408 | CDS  |
| hsa-miR-1266-5p | XM_017004619 | NLRC4 | 0.000326334 | CDS  |
| hsa-miR-1266-5p | XM_017004619 | NLRC4 | 0.001393668 | CDS  |
| hsa-miR-1266-3p | XM_017004619 | NLRC4 | 0.000483085 | CDS  |
| hsa-miR-1266-3p | XM_017004619 | NLRC4 | 0.001456926 | CDS  |
| hsa-miR-1266-3p | XM_017004619 | NLRC4 | 0.001083295 | CDS  |

|                    |              |       |             |      |
|--------------------|--------------|-------|-------------|------|
| hsa-miR-1268a      | XM_017004619 | NLRC4 | 0.001170791 | CDS  |
| hsa-miR-1268a      | XM_017004619 | NLRC4 | 0.001897022 | CDS  |
| hsa-miR-1269a      | XM_017004619 | NLRC4 | 0.000238785 | CDS  |
| hsa-miR-1269a      | XM_017004619 | NLRC4 | 0.003596187 | CDS  |
| hsa-miR-1270       | XM_017004619 | NLRC4 | 0.08822971  | CDS  |
| hsa-miR-1272       | XM_017004619 | NLRC4 | 0.01064677  | CDS  |
| hsa-miR-1275       | XM_017004619 | NLRC4 | 0.01058857  | CDS  |
| hsa-miR-1275       | XM_017004619 | NLRC4 | 0.000345859 | CDS  |
| hsa-miR-1276       | XM_017004619 | NLRC4 | 0.000503184 | 5UTR |
| hsa-miR-1281       | XM_017004619 | NLRC4 | 0.000669213 | CDS  |
| hsa-miR-1282       | XM_017004619 | NLRC4 | 0.000337721 | 3UTR |
| hsa-miR-1288-3p    | XM_017004619 | NLRC4 | 6.39E-05    | CDS  |
| hsa-miR-1292-5p    | XM_017004619 | NLRC4 | 4.03E-05    | CDS  |
| hsa-miR-1292-5p    | XM_017004619 | NLRC4 | 0.001633284 | CDS  |
| hsa-miR-1292-3p    | XM_017004619 | NLRC4 | 8.36E-06    | CDS  |
| hsa-miR-1292-3p    | XM_017004619 | NLRC4 | 5.89E-05    | 3UTR |
| hsa-miR-1292-3p    | XM_017004619 | NLRC4 | 1.22E-05    | CDS  |
| hsa-miR-1255b-2-3p | XM_017004619 | NLRC4 | 0.000802077 | CDS  |
| hsa-miR-664a-5p    | XM_017004619 | NLRC4 | 0.06091269  | CDS  |
| hsa-miR-1306-5p    | XM_017004619 | NLRC4 | 1.60E-05    | CDS  |
| hsa-miR-1306-5p    | XM_017004619 | NLRC4 | 4.84E-07    | CDS  |
| hsa-miR-1306-5p    | XM_017004619 | NLRC4 | 6.06E-05    | CDS  |
| hsa-miR-1307-5p    | XM_017004619 | NLRC4 | 0.000112833 | CDS  |
| hsa-miR-1307-3p    | XM_017004619 | NLRC4 | 0.001218159 | CDS  |
| hsa-miR-1307-3p    | XM_017004619 | NLRC4 | 2.57E-05    | CDS  |
| hsa-miR-513b-3p    | XM_017004619 | NLRC4 | 0.000552817 | CDS  |
| hsa-miR-513c-5p    | XM_017004619 | NLRC4 | 3.04E-05    | CDS  |
| hsa-miR-513c-3p    | XM_017004619 | NLRC4 | 0.001300536 | 5UTR |
| hsa-miR-1321       | XM_017004619 | NLRC4 | 4.03E-06    | CDS  |
| hsa-miR-1469       | XM_017004619 | NLRC4 | 0.001035763 | CDS  |
| hsa-miR-1469       | XM_017004619 | NLRC4 | 0.01195042  | CDS  |
| hsa-miR-1470       | XM_017004619 | NLRC4 | 7.76E-05    | CDS  |
| hsa-miR-1470       | XM_017004619 | NLRC4 | 2.98E-05    | CDS  |
| hsa-miR-1471       | XM_017004619 | NLRC4 | 0.000159806 | CDS  |
| hsa-miR-1471       | XM_017004619 | NLRC4 | 0.000251763 | CDS  |
| hsa-miR-1538       | XM_017004619 | NLRC4 | 4.84E-07    | CDS  |
| hsa-miR-1538       | XM_017004619 | NLRC4 | 6.98E-06    | CDS  |
| hsa-miR-1538       | XM_017004619 | NLRC4 | 1.46E-05    | CDS  |
| hsa-miR-1538       | XM_017004619 | NLRC4 | 0.001503355 | CDS  |
| hsa-miR-1539       | XM_017004619 | NLRC4 | 6.33E-06    | CDS  |
| hsa-miR-1539       | XM_017004619 | NLRC4 | 6.12E-05    | 3UTR |
| hsa-miR-1539       | XM_017004619 | NLRC4 | 0.00027781  | CDS  |
| hsa-miR-1825       | XM_017004619 | NLRC4 | 0.001188578 | 5UTR |
| hsa-miR-1908-5p    | XM_017004619 | NLRC4 | 0.0268879   | CDS  |

|                 |              |       |             |      |
|-----------------|--------------|-------|-------------|------|
| hsa-miR-1908-3p | XM_017004619 | NLRC4 | 0.001172201 | CDS  |
| hsa-miR-1908-3p | XM_017004619 | NLRC4 | 8.09E-06    | CDS  |
| hsa-miR-1909-5p | XM_017004619 | NLRC4 | 0.000189882 | 3UTR |
| hsa-miR-1909-5p | XM_017004619 | NLRC4 | 0.002564212 | CDS  |
| hsa-miR-1910-5p | XM_017004619 | NLRC4 | 0.006567177 | CDS  |
| hsa-miR-1910-3p | XM_017004619 | NLRC4 | 0.04659251  | CDS  |
| hsa-miR-1911-5p | XM_017004619 | NLRC4 | 1.88E-05    | CDS  |
| hsa-miR-1911-5p | XM_017004619 | NLRC4 | 1.59E-05    | CDS  |
| hsa-miR-1912-3p | XM_017004619 | NLRC4 | 3.78E-05    | CDS  |
| hsa-miR-1913    | XM_017004619 | NLRC4 | 0.01223285  | CDS  |
| hsa-miR-1914-5p | XM_017004619 | NLRC4 | 3.49E-05    | 3UTR |
| hsa-miR-1914-3p | XM_017004619 | NLRC4 | 0.00933987  | CDS  |
| hsa-miR-1914-3p | XM_017004619 | NLRC4 | 0.001014646 | CDS  |
| hsa-miR-1915-5p | XM_017004619 | NLRC4 | 1.82E-06    | CDS  |
| hsa-miR-1915-5p | XM_017004619 | NLRC4 | 0.000326687 | CDS  |
| hsa-miR-1915-3p | XM_017004619 | NLRC4 | 1.23E-05    | CDS  |
| hsa-miR-1972    | XM_017004619 | NLRC4 | 0.001447161 | CDS  |
| hsa-miR-1972    | XM_017004619 | NLRC4 | 1.16E-05    | CDS  |
| hsa-miR-1973    | XM_017004619 | NLRC4 | 4.87E-05    | CDS  |
| hsa-miR-1976    | XM_017004619 | NLRC4 | 6.44E-07    | CDS  |
| hsa-miR-1976    | XM_017004619 | NLRC4 | 0.000337721 | 3UTR |
| hsa-miR-1976    | XM_017004619 | NLRC4 | 0.000244245 | CDS  |
| hsa-miR-2110    | XM_017004619 | NLRC4 | 6.26E-05    | CDS  |
| hsa-miR-2110    | XM_017004619 | NLRC4 | 5.56E-06    | CDS  |
| hsa-miR-2114-5p | XM_017004619 | NLRC4 | 0.000239915 | CDS  |
| hsa-miR-2114-5p | XM_017004619 | NLRC4 | 0.001172201 | CDS  |
| hsa-miR-2114-5p | XM_017004619 | NLRC4 | 0.004018656 | CDS  |
| hsa-miR-2114-3p | XM_017004619 | NLRC4 | 7.36E-06    | CDS  |
| hsa-miR-2114-3p | XM_017004619 | NLRC4 | 4.14E-05    | CDS  |
| hsa-miR-2115-5p | XM_017004619 | NLRC4 | 3.88E-05    | CDS  |
| hsa-miR-2115-5p | XM_017004619 | NLRC4 | 0.00015002  | CDS  |
| hsa-miR-2116-5p | XM_017004619 | NLRC4 | 4.06E-07    | CDS  |
| hsa-miR-2116-3p | XM_017004619 | NLRC4 | 0.000245493 | CDS  |
| hsa-miR-2117    | XM_017004619 | NLRC4 | 0.000668222 | 5UTR |
| hsa-miR-2276-5p | XM_017004619 | NLRC4 | 0.000535268 | CDS  |
| hsa-miR-2276-5p | XM_017004619 | NLRC4 | 8.27E-06    | CDS  |
| hsa-miR-2276-5p | XM_017004619 | NLRC4 | 7.76E-05    | CDS  |
| hsa-miR-2276-3p | XM_017004619 | NLRC4 | 6.54E-06    | CDS  |
| hsa-miR-2277-5p | XM_017004619 | NLRC4 | 0.000479692 | CDS  |
| hsa-miR-2277-5p | XM_017004619 | NLRC4 | 1.00E-06    | CDS  |
| hsa-miR-2277-3p | XM_017004619 | NLRC4 | 1.48E-05    | CDS  |
| hsa-miR-2681-3p | XM_017004619 | NLRC4 | 0.04156789  | CDS  |
| hsa-miR-2682-3p | XM_017004619 | NLRC4 | 2.92E-05    | CDS  |
| hsa-miR-2682-3p | XM_017004619 | NLRC4 | 7.69E-06    | CDS  |

|                 |              |       |             |      |
|-----------------|--------------|-------|-------------|------|
| hsa-miR-2682-3p | XM_017004619 | NLRC4 | 0.000542025 | CDS  |
| hsa-miR-711     | XM_017004619 | NLRC4 | 0.000671559 | CDS  |
| hsa-miR-711     | XM_017004619 | NLRC4 | 0.000407782 | CDS  |
| hsa-miR-718     | XM_017004619 | NLRC4 | 1.21E-05    | CDS  |
| hsa-miR-718     | XM_017004619 | NLRC4 | 2.98E-05    | CDS  |
| hsa-miR-718     | XM_017004619 | NLRC4 | 3.43E-05    | 3UTR |
| hsa-miR-2861    | XM_017004619 | NLRC4 | 7.19E-05    | CDS  |
| hsa-miR-2861    | XM_017004619 | NLRC4 | 0.01176218  | CDS  |
| hsa-miR-2909    | XM_017004619 | NLRC4 | 0.001027397 | CDS  |
| hsa-miR-3119    | XM_017004619 | NLRC4 | 0.00116715  | CDS  |
| hsa-miR-3120-5p | XM_017004619 | NLRC4 | 5.86E-06    | CDS  |
| hsa-miR-3120-5p | XM_017004619 | NLRC4 | 0.002171061 | CDS  |
| hsa-miR-3120-5p | XM_017004619 | NLRC4 | 6.12E-05    | 3UTR |
| hsa-miR-3120-3p | XM_017004619 | NLRC4 | 5.90E-05    | CDS  |
| hsa-miR-3122    | XM_017004619 | NLRC4 | 0.01730902  | CDS  |
| hsa-miR-3124-3p | XM_017004619 | NLRC4 | 0.000195346 | CDS  |
| hsa-miR-3126-3p | XM_017004619 | NLRC4 | 4.19E-05    | CDS  |
| hsa-miR-3127-5p | XM_017004619 | NLRC4 | 0.006385549 | CDS  |
| hsa-miR-3127-3p | XM_017004619 | NLRC4 | 0.006055493 | CDS  |
| hsa-miR-3127-3p | XM_017004619 | NLRC4 | 0.000542111 | CDS  |
| hsa-miR-3130-5p | XM_017004619 | NLRC4 | 6.15E-05    | CDS  |
| hsa-miR-3130-5p | XM_017004619 | NLRC4 | 8.94E-05    | CDS  |
| hsa-miR-3130-3p | XM_017004619 | NLRC4 | 0.0101559   | CDS  |
| hsa-miR-3130-3p | XM_017004619 | NLRC4 | 7.95E-06    | CDS  |
| hsa-miR-3131    | XM_017004619 | NLRC4 | 0.000598122 | CDS  |
| hsa-miR-3132    | XM_017004619 | NLRC4 | 0.03129093  | CDS  |
| hsa-miR-378b    | XM_017004619 | NLRC4 | 0.02675239  | CDS  |
| hsa-miR-3135a   | XM_017004619 | NLRC4 | 8.94E-05    | CDS  |
| hsa-miR-3135a   | XM_017004619 | NLRC4 | 1.44E-06    | 3UTR |
| hsa-miR-3135a   | XM_017004619 | NLRC4 | 0.001564598 | CDS  |
| hsa-miR-3136-3p | XM_017004619 | NLRC4 | 7.76E-05    | CDS  |
| hsa-miR-544b    | XM_017004619 | NLRC4 | 8.35E-05    | CDS  |
| hsa-miR-544b    | XM_017004619 | NLRC4 | 8.80E-06    | CDS  |
| hsa-miR-3137    | XM_017004619 | NLRC4 | 0.000150393 | CDS  |
| hsa-miR-3138    | XM_017004619 | NLRC4 | 0.09363977  | CDS  |
| hsa-miR-3138    | XM_017004619 | NLRC4 | 0.003450568 | CDS  |
| hsa-miR-3139    | XM_017004619 | NLRC4 | 9.25E-07    | CDS  |
| hsa-miR-3139    | XM_017004619 | NLRC4 | 4.59E-05    | CDS  |
| hsa-miR-3140-3p | XM_017004619 | NLRC4 | 6.20E-05    | CDS  |
| hsa-miR-3140-3p | XM_017004619 | NLRC4 | 2.88E-05    | CDS  |
| hsa-miR-3141    | XM_017004619 | NLRC4 | 0.000671559 | CDS  |
| hsa-miR-3141    | XM_017004619 | NLRC4 | 0.000642323 | CDS  |
| hsa-miR-3144-5p | XM_017004619 | NLRC4 | 0.005514936 | CDS  |
| hsa-miR-3144-5p | XM_017004619 | NLRC4 | 0.002762722 | 5UTR |



|                  |              |       |             |      |
|------------------|--------------|-------|-------------|------|
| hsa-miR-3144-3p  | XM_017004619 | NLRC4 | 6.12E-05    | 3UTR |
| hsa-miR-3147     | XM_017004619 | NLRC4 | 0.1399983   | CDS  |
| hsa-miR-3147     | XM_017004619 | NLRC4 | 0.01054983  | CDS  |
| hsa-miR-3147     | XM_017004619 | NLRC4 | 1.00E-06    | CDS  |
| hsa-miR-3148     | XM_017004619 | NLRC4 | 0.03211739  | CDS  |
| hsa-miR-3150a-3p | XM_017004619 | NLRC4 | 1.24E-05    | CDS  |
| hsa-miR-3150a-3p | XM_017004619 | NLRC4 | 4.74E-06    | CDS  |
| hsa-miR-3150a-3p | XM_017004619 | NLRC4 | 4.66E-05    | CDS  |
| hsa-miR-3151-5p  | XM_017004619 | NLRC4 | 0.01634487  | 5UTR |
| hsa-miR-3151-5p  | XM_017004619 | NLRC4 | 0.04004941  | CDS  |
| hsa-miR-3151-5p  | XM_017004619 | NLRC4 | 0.00034557  | CDS  |
| hsa-miR-3153     | XM_017004619 | NLRC4 | 0.008326793 | CDS  |
| hsa-miR-3074-5p  | XM_017004619 | NLRC4 | 0.01928178  | CDS  |
| hsa-miR-3154     | XM_017004619 | NLRC4 | 0.000956925 | CDS  |
| hsa-miR-3154     | XM_017004619 | NLRC4 | 0.01542657  | CDS  |
| hsa-miR-3155a    | XM_017004619 | NLRC4 | 6.15E-05    | CDS  |
| hsa-miR-3156-3p  | XM_017004619 | NLRC4 | 2.98E-05    | CDS  |
| hsa-miR-3156-3p  | XM_017004619 | NLRC4 | 0.002940157 | CDS  |
| hsa-miR-3157-5p  | XM_017004619 | NLRC4 | 1.56E-05    | CDS  |
| hsa-miR-3157-3p  | XM_017004619 | NLRC4 | 4.84E-07    | CDS  |
| hsa-miR-3157-3p  | XM_017004619 | NLRC4 | 8.27E-06    | CDS  |
| hsa-miR-3158-5p  | XM_017004619 | NLRC4 | 7.28E-05    | CDS  |
| hsa-miR-3158-5p  | XM_017004619 | NLRC4 | 6.97E-06    | CDS  |
| hsa-miR-3158-3p  | XM_017004619 | NLRC4 | 4.47E-06    | CDS  |
| hsa-miR-3158-3p  | XM_017004619 | NLRC4 | 1.24E-05    | CDS  |
| hsa-miR-3158-3p  | XM_017004619 | NLRC4 | 3.41E-07    | CDS  |
| hsa-miR-3159     | XM_017004619 | NLRC4 | 0.01001738  | CDS  |
| hsa-miR-3160-5p  | XM_017004619 | NLRC4 | 1.47E-05    | CDS  |
| hsa-miR-3160-5p  | XM_017004619 | NLRC4 | 0.000646339 | CDS  |
| hsa-miR-3161     | XM_017004619 | NLRC4 | 0.000785087 | CDS  |
| hsa-miR-3162-5p  | XM_017004619 | NLRC4 | 0.1988711   | CDS  |
| hsa-miR-3162-5p  | XM_017004619 | NLRC4 | 0.01459592  | CDS  |
| hsa-miR-3165     | XM_017004619 | NLRC4 | 0.03973969  | CDS  |
| hsa-miR-3165     | XM_017004619 | NLRC4 | 0.003523479 | 5UTR |
| hsa-miR-3165     | XM_017004619 | NLRC4 | 0.01194815  | CDS  |
| hsa-miR-3169     | XM_017004619 | NLRC4 | 7.06E-05    | CDS  |
| hsa-miR-3170     | XM_017004619 | NLRC4 | 1.46E-05    | CDS  |
| hsa-miR-3173-5p  | XM_017004619 | NLRC4 | 0.004730357 | CDS  |
| hsa-miR-3173-5p  | XM_017004619 | NLRC4 | 0.03271231  | CDS  |
| hsa-miR-3173-3p  | XM_017004619 | NLRC4 | 3.78E-05    | CDS  |
| hsa-miR-1193     | XM_017004619 | NLRC4 | 0.000276588 | 5UTR |
| hsa-miR-1193     | XM_017004619 | NLRC4 | 0.005224415 | CDS  |
| hsa-miR-323b-5p  | XM_017004619 | NLRC4 | 0.02274744  | CDS  |
| hsa-miR-323b-5p  | XM_017004619 | NLRC4 | 4.59E-05    | CDS  |

|                 |              |       |             |      |
|-----------------|--------------|-------|-------------|------|
| hsa-miR-3174    | XM_017004619 | NLRC4 | 0.000365711 | CDS  |
| hsa-miR-3174    | XM_017004619 | NLRC4 | 8.97E-05    | CDS  |
| hsa-miR-3175    | XM_017004619 | NLRC4 | 8.64E-05    | CDS  |
| hsa-miR-3175    | XM_017004619 | NLRC4 | 0.000956925 | CDS  |
| hsa-miR-3176    | XM_017004619 | NLRC4 | 0.000271137 | CDS  |
| hsa-miR-3176    | XM_017004619 | NLRC4 | 0.01623033  | CDS  |
| hsa-miR-3177-5p | XM_017004619 | NLRC4 | 1.95E-05    | 3UTR |
| hsa-miR-3177-3p | XM_017004619 | NLRC4 | 0.001670142 | CDS  |
| hsa-miR-3178    | XM_017004619 | NLRC4 | 5.97E-06    | CDS  |
| hsa-miR-3178    | XM_017004619 | NLRC4 | 0.003639629 | CDS  |
| hsa-miR-3180-5p | XM_017004619 | NLRC4 | 1.21E-05    | CDS  |
| hsa-miR-3180-5p | XM_017004619 | NLRC4 | 5.25E-05    | CDS  |
| hsa-miR-3180-3p | XM_017004619 | NLRC4 | 3.17E-07    | CDS  |
| hsa-miR-3180-3p | XM_017004619 | NLRC4 | 0.002815688 | CDS  |
| hsa-miR-3181    | XM_017004619 | NLRC4 | 6.65E-06    | CDS  |
| hsa-miR-3183    | XM_017004619 | NLRC4 | 5.89E-05    | 3UTR |
| hsa-miR-3184-5p | XM_017004619 | NLRC4 | 2.28E-05    | CDS  |
| hsa-miR-3184-5p | XM_017004619 | NLRC4 | 0.01868271  | 5UTR |
| hsa-miR-3184-3p | XM_017004619 | NLRC4 | 0.001050863 | CDS  |
| hsa-miR-3184-3p | XM_017004619 | NLRC4 | 0.00037471  | CDS  |
| hsa-miR-3185    | XM_017004619 | NLRC4 | 0.01250097  | CDS  |
| hsa-miR-3185    | XM_017004619 | NLRC4 | 2.11E-05    | CDS  |
| hsa-miR-3065-3p | XM_017004619 | NLRC4 | 0.01519719  | CDS  |
| hsa-miR-3065-3p | XM_017004619 | NLRC4 | 1.19E-05    | CDS  |
| hsa-miR-3186-5p | XM_017004619 | NLRC4 | 0.000441636 | CDS  |
| hsa-miR-3186-5p | XM_017004619 | NLRC4 | 0.000645022 | 3UTR |
| hsa-miR-3186-5p | XM_017004619 | NLRC4 | 4.15E-05    | CDS  |
| hsa-miR-3186-3p | XM_017004619 | NLRC4 | 0.001972862 | CDS  |
| hsa-miR-3186-3p | XM_017004619 | NLRC4 | 0.005620409 | CDS  |
| hsa-miR-3187-5p | XM_017004619 | NLRC4 | 0.1399983   | CDS  |
| hsa-miR-3187-5p | XM_017004619 | NLRC4 | 8.80E-06    | CDS  |
| hsa-miR-3187-3p | XM_017004619 | NLRC4 | 0.001503355 | CDS  |
| hsa-miR-3187-3p | XM_017004619 | NLRC4 | 0.01732928  | CDS  |
| hsa-miR-3188    | XM_017004619 | NLRC4 | 1.36E-05    | 3UTR |
| hsa-miR-3188    | XM_017004619 | NLRC4 | 5.97E-06    | CDS  |
| hsa-miR-3189-5p | XM_017004619 | NLRC4 | 0.000159806 | CDS  |
| hsa-miR-3189-3p | XM_017004619 | NLRC4 | 7.16E-06    | CDS  |
| hsa-miR-3189-3p | XM_017004619 | NLRC4 | 2.06E-05    | CDS  |
| hsa-miR-3189-3p | XM_017004619 | NLRC4 | 0.000120896 | CDS  |
| hsa-miR-3190-5p | XM_017004619 | NLRC4 | 5.56E-06    | CDS  |
| hsa-miR-3190-3p | XM_017004619 | NLRC4 | 0.001218159 | CDS  |
| hsa-miR-3190-3p | XM_017004619 | NLRC4 | 0.08798883  | CDS  |
| hsa-miR-3191-5p | XM_017004619 | NLRC4 | 0.000225565 | CDS  |
| hsa-miR-3191-5p | XM_017004619 | NLRC4 | 5.29E-05    | 3UTR |

|                 |              |       |             |      |
|-----------------|--------------|-------|-------------|------|
| hsa-miR-3191-3p | XM_017004619 | NLRC4 | 0.01247752  | CDS  |
| hsa-miR-3191-3p | XM_017004619 | NLRC4 | 1.04E-05    | CDS  |
| hsa-miR-3192-5p | XM_017004619 | NLRC4 | 1.23E-05    | CDS  |
| hsa-miR-3192-5p | XM_017004619 | NLRC4 | 0.00210636  | CDS  |
| hsa-miR-3192-5p | XM_017004619 | NLRC4 | 0.006869599 | CDS  |
| hsa-miR-3192-3p | XM_017004619 | NLRC4 | 0.01223285  | CDS  |
| hsa-miR-3192-3p | XM_017004619 | NLRC4 | 6.31E-05    | 3UTR |
| hsa-miR-3192-3p | XM_017004619 | NLRC4 | 6.65E-06    | CDS  |
| hsa-miR-3193    | XM_017004619 | NLRC4 | 0.006055493 | CDS  |
| hsa-miR-3193    | XM_017004619 | NLRC4 | 0.001410534 | CDS  |
| hsa-miR-3194-5p | XM_017004619 | NLRC4 | 4.06E-07    | CDS  |
| hsa-miR-3194-3p | XM_017004619 | NLRC4 | 2.94E-05    | CDS  |
| hsa-miR-3194-3p | XM_017004619 | NLRC4 | 7.76E-05    | CDS  |
| hsa-miR-3195    | XM_017004619 | NLRC4 | 4.11E-05    | 3UTR |
| hsa-miR-3195    | XM_017004619 | NLRC4 | 6.05E-07    | CDS  |
| hsa-miR-3196    | XM_017004619 | NLRC4 | 3.17E-07    | CDS  |
| hsa-miR-3196    | XM_017004619 | NLRC4 | 0.001727314 | CDS  |
| hsa-miR-3197    | XM_017004619 | NLRC4 | 0.000161338 | CDS  |
| hsa-miR-3197    | XM_017004619 | NLRC4 | 0.000379735 | CDS  |
| hsa-miR-3197    | XM_017004619 | NLRC4 | 0.001135043 | CDS  |
| hsa-miR-3198    | XM_017004619 | NLRC4 | 9.56E-06    | CDS  |
| hsa-miR-3198    | XM_017004619 | NLRC4 | 5.03E-05    | CDS  |
| hsa-miR-3198    | XM_017004619 | NLRC4 | 0.000297589 | CDS  |
| hsa-miR-3199    | XM_017004619 | NLRC4 | 5.47E-06    | CDS  |
| hsa-miR-3200-5p | XM_017004619 | NLRC4 | 0.006869599 | CDS  |
| hsa-miR-3200-3p | XM_017004619 | NLRC4 | 0.00027781  | CDS  |
| hsa-miR-514b-5p | XM_017004619 | NLRC4 | 3.04E-05    | CDS  |
| hsa-miR-3202    | XM_017004619 | NLRC4 | 0.05383761  | CDS  |
| hsa-miR-4296    | XM_017004619 | NLRC4 | 0.005126806 | CDS  |
| hsa-miR-378c    | XM_017004619 | NLRC4 | 0.000228869 | CDS  |
| hsa-miR-4293    | XM_017004619 | NLRC4 | 1.05E-05    | CDS  |
| hsa-miR-4294    | XM_017004619 | NLRC4 | 0.001633284 | CDS  |
| hsa-miR-4294    | XM_017004619 | NLRC4 | 4.59E-05    | CDS  |
| hsa-miR-4299    | XM_017004619 | NLRC4 | 0.01623033  | CDS  |
| hsa-miR-4299    | XM_017004619 | NLRC4 | 4.36E-05    | CDS  |
| hsa-miR-4298    | XM_017004619 | NLRC4 | 0.02675239  | CDS  |
| hsa-miR-4298    | XM_017004619 | NLRC4 | 0.02468582  | CDS  |
| hsa-miR-4304    | XM_017004619 | NLRC4 | 3.49E-05    | CDS  |
| hsa-miR-4304    | XM_017004619 | NLRC4 | 0.0294755   | CDS  |
| hsa-miR-4302    | XM_017004619 | NLRC4 | 0.09125359  | CDS  |
| hsa-miR-4303    | XM_017004619 | NLRC4 | 0.04786547  | 5UTR |
| hsa-miR-4303    | XM_017004619 | NLRC4 | 2.89E-05    | 5UTR |
| hsa-miR-4306    | XM_017004619 | NLRC4 | 0.02468582  | CDS  |
| hsa-miR-4309    | XM_017004619 | NLRC4 | 0.00013214  | CDS  |

|                 |              |       |             |      |
|-----------------|--------------|-------|-------------|------|
| hsa-miR-4309    | XM_017004619 | NLRC4 | 1.16E-05    | CDS  |
| hsa-miR-4308    | XM_017004619 | NLRC4 | 0.003473051 | CDS  |
| hsa-miR-4310    | XM_017004619 | NLRC4 | 6.41E-06    | CDS  |
| hsa-miR-4311    | XM_017004619 | NLRC4 | 0.03337992  | CDS  |
| hsa-miR-4311    | XM_017004619 | NLRC4 | 0.000654256 | CDS  |
| hsa-miR-4312    | XM_017004619 | NLRC4 | 0.00037471  | CDS  |
| hsa-miR-4312    | XM_017004619 | NLRC4 | 0.000646339 | CDS  |
| hsa-miR-4312    | XM_017004619 | NLRC4 | 0.000125663 | CDS  |
| hsa-miR-4313    | XM_017004619 | NLRC4 | 1.60E-06    | CDS  |
| hsa-miR-4316    | XM_017004619 | NLRC4 | 0.009044755 | CDS  |
| hsa-miR-4316    | XM_017004619 | NLRC4 | 3.99E-05    | CDS  |
| hsa-miR-4314    | XM_017004619 | NLRC4 | 0.001185525 | CDS  |
| hsa-miR-4314    | XM_017004619 | NLRC4 | 7.16E-06    | CDS  |
| hsa-miR-4318    | XM_017004619 | NLRC4 | 0.04671732  | CDS  |
| hsa-miR-4320    | XM_017004619 | NLRC4 | 0.002224226 | CDS  |
| hsa-miR-4320    | XM_017004619 | NLRC4 | 1.86E-05    | CDS  |
| hsa-miR-4322    | XM_017004619 | NLRC4 | 1.85E-06    | CDS  |
| hsa-miR-4322    | XM_017004619 | NLRC4 | 4.98E-06    | CDS  |
| hsa-miR-4322    | XM_017004619 | NLRC4 | 2.98E-05    | CDS  |
| hsa-miR-4321    | XM_017004619 | NLRC4 | 6.67E-05    | CDS  |
| hsa-miR-4321    | XM_017004619 | NLRC4 | 0.000406814 | CDS  |
| hsa-miR-4321    | XM_017004619 | NLRC4 | 0.004898831 | CDS  |
| hsa-miR-4257    | XM_017004619 | NLRC4 | 0.009044755 | CDS  |
| hsa-miR-4259    | XM_017004619 | NLRC4 | 0.000956925 | CDS  |
| hsa-miR-4259    | XM_017004619 | NLRC4 | 0.000953849 | CDS  |
| hsa-miR-4260    | XM_017004619 | NLRC4 | 0.000158814 | CDS  |
| hsa-miR-4260    | XM_017004619 | NLRC4 | 0.000267696 | CDS  |
| hsa-miR-4253    | XM_017004619 | NLRC4 | 0.004123571 | CDS  |
| hsa-miR-4254    | XM_017004619 | NLRC4 | 2.92E-05    | CDS  |
| hsa-miR-4254    | XM_017004619 | NLRC4 | 1.35E-05    | CDS  |
| hsa-miR-4252    | XM_017004619 | NLRC4 | 0.003190413 | CDS  |
| hsa-miR-4326    | XM_017004619 | NLRC4 | 5.29E-05    | 3UTR |
| hsa-miR-4327    | XM_017004619 | NLRC4 | 2.04E-05    | CDS  |
| hsa-miR-4327    | XM_017004619 | NLRC4 | 1.05E-05    | CDS  |
| hsa-miR-4265    | XM_017004619 | NLRC4 | 0.2724825   | CDS  |
| hsa-miR-4266    | XM_017004619 | NLRC4 | 4.74E-06    | CDS  |
| hsa-miR-4262    | XM_017004619 | NLRC4 | 6.67E-05    | CDS  |
| hsa-miR-2355-5p | XM_017004619 | NLRC4 | 0.001180368 | CDS  |
| hsa-miR-4268    | XM_017004619 | NLRC4 | 0.000519135 | CDS  |
| hsa-miR-4269    | XM_017004619 | NLRC4 | 0.000293001 | CDS  |
| hsa-miR-4269    | XM_017004619 | NLRC4 | 4.61E-07    | CDS  |
| hsa-miR-4263    | XM_017004619 | NLRC4 | 0.000369226 | 3UTR |
| hsa-miR-4271    | XM_017004619 | NLRC4 | 0.1988711   | CDS  |
| hsa-miR-4281    | XM_017004619 | NLRC4 | 0.000671559 | CDS  |

|                  |              |       |             |      |
|------------------|--------------|-------|-------------|------|
| hsa-miR-4281     | XM_017004619 | NLRC4 | 0.01001738  | CDS  |
| hsa-miR-4281     | XM_017004619 | NLRC4 | 4.59E-05    | CDS  |
| hsa-miR-4277     | XM_017004619 | NLRC4 | 0.09531335  | CDS  |
| hsa-miR-4278     | XM_017004619 | NLRC4 | 0.03498518  | CDS  |
| hsa-miR-4280     | XM_017004619 | NLRC4 | 0.000150393 | CDS  |
| hsa-miR-4283     | XM_017004619 | NLRC4 | 0.00034557  | CDS  |
| hsa-miR-4283     | XM_017004619 | NLRC4 | 0.01646196  | 5UTR |
| hsa-miR-4284     | XM_017004619 | NLRC4 | 9.51E-07    | CDS  |
| hsa-miR-4287     | XM_017004619 | NLRC4 | 0.000268253 | CDS  |
| hsa-miR-4288     | XM_017004619 | NLRC4 | 0.001120008 | CDS  |
| hsa-miR-4292     | XM_017004619 | NLRC4 | 7.16E-06    | CDS  |
| hsa-miR-4289     | XM_017004619 | NLRC4 | 7.01E-06    | CDS  |
| hsa-miR-4289     | XM_017004619 | NLRC4 | 0.001204086 | CDS  |
| hsa-miR-4291     | XM_017004619 | NLRC4 | 0.00175646  | CDS  |
| hsa-miR-4330     | XM_017004619 | NLRC4 | 0.002444199 | CDS  |
| hsa-miR-500b-5p  | XM_017004619 | NLRC4 | 0.009867866 | CDS  |
| hsa-miR-500b-3p  | XM_017004619 | NLRC4 | 0.009241356 | CDS  |
| hsa-miR-3605-3p  | XM_017004619 | NLRC4 | 0.000612062 | CDS  |
| hsa-miR-3605-3p  | XM_017004619 | NLRC4 | 1.83E-05    | 3UTR |
| hsa-miR-3612     | XM_017004619 | NLRC4 | 4.35E-05    | CDS  |
| hsa-miR-3612     | XM_017004619 | NLRC4 | 6.66E-06    | CDS  |
| hsa-miR-3614-5p  | XM_017004619 | NLRC4 | 0.006567177 | CDS  |
| hsa-miR-3614-3p  | XM_017004619 | NLRC4 | 0.00015002  | CDS  |
| hsa-miR-3615     | XM_017004619 | NLRC4 | 0.000583201 | CDS  |
| hsa-miR-3615     | XM_017004619 | NLRC4 | 7.91E-05    | CDS  |
| hsa-miR-3616-3p  | XM_017004619 | NLRC4 | 0.000326334 | CDS  |
| hsa-miR-3619-5p  | XM_017004619 | NLRC4 | 1.19E-05    | CDS  |
| hsa-miR-3619-5p  | XM_017004619 | NLRC4 | 0.000112833 | CDS  |
| hsa-miR-3619-3p  | XM_017004619 | NLRC4 | 0.008415762 | CDS  |
| hsa-miR-3619-3p  | XM_017004619 | NLRC4 | 3.58E-06    | CDS  |
| hsa-miR-3620-5p  | XM_017004619 | NLRC4 | 0.000133333 | CDS  |
| hsa-miR-3620-5p  | XM_017004619 | NLRC4 | 0.000755782 | CDS  |
| hsa-miR-3620-5p  | XM_017004619 | NLRC4 | 0.01465807  | CDS  |
| hsa-miR-3621     | XM_017004619 | NLRC4 | 1.85E-05    | CDS  |
| hsa-miR-3621     | XM_017004619 | NLRC4 | 1.63E-06    | CDS  |
| hsa-miR-3622a-5p | XM_017004619 | NLRC4 | 0.00091255  | CDS  |
| hsa-miR-3622b-5p | XM_017004619 | NLRC4 | 0.003824517 | CDS  |
| hsa-miR-3622b-5p | XM_017004619 | NLRC4 | 0.001200807 | 5UTR |
| hsa-miR-3648     | XM_017004619 | NLRC4 | 0.001037091 | CDS  |
| hsa-miR-3648     | XM_017004619 | NLRC4 | 2.21E-05    | CDS  |
| hsa-miR-3650     | XM_017004619 | NLRC4 | 3.82E-05    | CDS  |
| hsa-miR-3652     | XM_017004619 | NLRC4 | 0.00053405  | CDS  |
| hsa-miR-3654     | XM_017004619 | NLRC4 | 0.000897224 | CDS  |
| hsa-miR-3655     | XM_017004619 | NLRC4 | 4.97E-05    | CDS  |

|                  |              |       |             |      |
|------------------|--------------|-------|-------------|------|
| hsa-miR-3660     | XM_017004619 | NLRC4 | 5.25E-06    | CDS  |
| hsa-miR-3661     | XM_017004619 | NLRC4 | 5.93E-05    | 3UTR |
| hsa-miR-3663-5p  | XM_017004619 | NLRC4 | 0.000999579 | CDS  |
| hsa-miR-3663-5p  | XM_017004619 | NLRC4 | 0.003088161 | CDS  |
| hsa-miR-3663-3p  | XM_017004619 | NLRC4 | 0.000331211 | CDS  |
| hsa-miR-3664-3p  | XM_017004619 | NLRC4 | 0.01479238  | CDS  |
| hsa-miR-3665     | XM_017004619 | NLRC4 | 9.79E-05    | CDS  |
| hsa-miR-3665     | XM_017004619 | NLRC4 | 0.00107409  | CDS  |
| hsa-miR-3665     | XM_017004619 | NLRC4 | 1.00E-06    | CDS  |
| hsa-miR-3665     | XM_017004619 | NLRC4 | 0.08871414  | CDS  |
| hsa-miR-3667-3p  | XM_017004619 | NLRC4 | 7.95E-06    | CDS  |
| hsa-miR-3667-3p  | XM_017004619 | NLRC4 | 2.56E-07    | CDS  |
| hsa-miR-3670     | XM_017004619 | NLRC4 | 3.68E-05    | CDS  |
| hsa-miR-3670     | XM_017004619 | NLRC4 | 6.65E-06    | CDS  |
| hsa-miR-3675-5p  | XM_017004619 | NLRC4 | 5.49E-05    | CDS  |
| hsa-miR-3675-5p  | XM_017004619 | NLRC4 | 3.17E-07    | CDS  |
| hsa-miR-3675-5p  | XM_017004619 | NLRC4 | 4.66E-05    | CDS  |
| hsa-miR-3677-5p  | XM_017004619 | NLRC4 | 0.000153631 | CDS  |
| hsa-miR-3677-5p  | XM_017004619 | NLRC4 | 9.25E-07    | CDS  |
| hsa-miR-3677-3p  | XM_017004619 | NLRC4 | 7.16E-06    | CDS  |
| hsa-miR-3677-3p  | XM_017004619 | NLRC4 | 5.85E-06    | CDS  |
| hsa-miR-3678-3p  | XM_017004619 | NLRC4 | 0.001727314 | CDS  |
| hsa-miR-3678-3p  | XM_017004619 | NLRC4 | 4.41E-05    | CDS  |
| hsa-miR-3679-5p  | XM_017004619 | NLRC4 | 0.001275108 | CDS  |
| hsa-miR-3679-5p  | XM_017004619 | NLRC4 | 0.000235798 | CDS  |
| hsa-miR-3679-5p  | XM_017004619 | NLRC4 | 0.000123213 | CDS  |
| hsa-miR-3679-3p  | XM_017004619 | NLRC4 | 0.000106281 | CDS  |
| hsa-miR-3680-5p  | XM_017004619 | NLRC4 | 0.000286363 | CDS  |
| hsa-miR-3680-5p  | XM_017004619 | NLRC4 | 0.000159806 | CDS  |
| hsa-miR-3680-3p  | XM_017004619 | NLRC4 | 4.78E-05    | CDS  |
| hsa-miR-3681-5p  | XM_017004619 | NLRC4 | 0.000620765 | CDS  |
| hsa-miR-3681-5p  | XM_017004619 | NLRC4 | 0.01718499  | CDS  |
| hsa-miR-3682-5p  | XM_017004619 | NLRC4 | 0.0037024   | CDS  |
| hsa-miR-3685     | XM_017004619 | NLRC4 | 1.12E-05    | CDS  |
| hsa-miR-3689a-5p | XM_017004619 | NLRC4 | 0.000169476 | CDS  |
| hsa-miR-3691-5p  | XM_017004619 | NLRC4 | 0.01189954  | CDS  |
| hsa-miR-3691-5p  | XM_017004619 | NLRC4 | 0.04158218  | CDS  |
| hsa-miR-3691-3p  | XM_017004619 | NLRC4 | 0.000337721 | 3UTR |
| hsa-miR-3692-5p  | XM_017004619 | NLRC4 | 0.01149959  | CDS  |
| hsa-miR-3692-5p  | XM_017004619 | NLRC4 | 0.001445108 | CDS  |
| hsa-miR-3692-3p  | XM_017004619 | NLRC4 | 4.78E-05    | CDS  |
| hsa-miR-3692-3p  | XM_017004619 | NLRC4 | 0.001965083 | CDS  |
| hsa-miR-3713     | XM_017004619 | NLRC4 | 0.000356132 | 3UTR |
| hsa-miR-3714     | XM_017004619 | NLRC4 | 1.86E-05    | CDS  |

|                  |              |       |             |      |
|------------------|--------------|-------|-------------|------|
| hsa-miR-3180     | XM_017004619 | NLRC4 | 4.95E-07    | CDS  |
| hsa-miR-3180     | XM_017004619 | NLRC4 | 0.000135949 | CDS  |
| hsa-miR-3907     | XM_017004619 | NLRC4 | 0.000608953 | CDS  |
| hsa-miR-3689b-5p | XM_017004619 | NLRC4 | 0.000169476 | CDS  |
| hsa-miR-3909     | XM_017004619 | NLRC4 | 0.006055493 | CDS  |
| hsa-miR-3909     | XM_017004619 | NLRC4 | 9.61E-05    | CDS  |
| hsa-miR-3911     | XM_017004619 | NLRC4 | 6.19E-05    | CDS  |
| hsa-miR-3911     | XM_017004619 | NLRC4 | 0.004588791 | CDS  |
| hsa-miR-3911     | XM_017004619 | NLRC4 | 0.000799382 | CDS  |
| hsa-miR-3911     | XM_017004619 | NLRC4 | 5.45E-06    | CDS  |
| hsa-miR-3912-5p  | XM_017004619 | NLRC4 | 0.01171861  | CDS  |
| hsa-miR-3915     | XM_017004619 | NLRC4 | 0.000139508 | CDS  |
| hsa-miR-3917     | XM_017004619 | NLRC4 | 0.001031207 | CDS  |
| hsa-miR-3918     | XM_017004619 | NLRC4 | 0.000671559 | CDS  |
| hsa-miR-3918     | XM_017004619 | NLRC4 | 0.001727314 | CDS  |
| hsa-miR-3150b-3p | XM_017004619 | NLRC4 | 0.04142576  | CDS  |
| hsa-miR-3921     | XM_017004619 | NLRC4 | 2.19E-05    | 5UTR |
| hsa-miR-3922-3p  | XM_017004619 | NLRC4 | 0.01422779  | 5UTR |
| hsa-miR-3925-5p  | XM_017004619 | NLRC4 | 0.000926972 | CDS  |
| hsa-miR-3925-3p  | XM_017004619 | NLRC4 | 3.98E-05    | CDS  |
| hsa-miR-3928-5p  | XM_017004619 | NLRC4 | 5.34E-05    | CDS  |
| hsa-miR-3928-5p  | XM_017004619 | NLRC4 | 2.13E-05    | CDS  |
| hsa-miR-3928-3p  | XM_017004619 | NLRC4 | 8.82E-05    | CDS  |
| hsa-miR-3928-3p  | XM_017004619 | NLRC4 | 0.05553747  | CDS  |
| hsa-miR-3929     | XM_017004619 | NLRC4 | 1.44E-05    | CDS  |
| hsa-miR-3929     | XM_017004619 | NLRC4 | 0.000598122 | CDS  |
| hsa-miR-3934-5p  | XM_017004619 | NLRC4 | 0.001023348 | CDS  |
| hsa-miR-3934-3p  | XM_017004619 | NLRC4 | 1.44E-06    | CDS  |
| hsa-miR-3934-3p  | XM_017004619 | NLRC4 | 0.000326334 | CDS  |
| hsa-miR-3934-3p  | XM_017004619 | NLRC4 | 8.94E-05    | CDS  |
| hsa-miR-3935     | XM_017004619 | NLRC4 | 0.01247752  | CDS  |
| hsa-miR-3936     | XM_017004619 | NLRC4 | 0.000598122 | CDS  |
| hsa-miR-3936     | XM_017004619 | NLRC4 | 9.79E-05    | CDS  |
| hsa-miR-3936     | XM_017004619 | NLRC4 | 4.35E-05    | CDS  |
| hsa-miR-3937     | XM_017004619 | NLRC4 | 4.56E-05    | CDS  |
| hsa-miR-3939     | XM_017004619 | NLRC4 | 4.03E-05    | CDS  |
| hsa-miR-3940-5p  | XM_017004619 | NLRC4 | 0.000799382 | CDS  |
| hsa-miR-3940-5p  | XM_017004619 | NLRC4 | 0.000281957 | CDS  |
| hsa-miR-3940-5p  | XM_017004619 | NLRC4 | 0.01403961  | CDS  |
| hsa-miR-3940-3p  | XM_017004619 | NLRC4 | 5.89E-05    | 3UTR |
| hsa-miR-3943     | XM_017004619 | NLRC4 | 4.87E-05    | 3UTR |
| hsa-miR-3943     | XM_017004619 | NLRC4 | 3.03E-05    | CDS  |
| hsa-miR-3944-5p  | XM_017004619 | NLRC4 | 2.50E-05    | CDS  |
| hsa-miR-3944-5p  | XM_017004619 | NLRC4 | 9.02E-06    | CDS  |

|                   |              |       |             |      |
|-------------------|--------------|-------|-------------|------|
| hsa-miR-3944-5p   | XM_017004619 | NLRC4 | 1.36E-05    | CDS  |
| hsa-miR-3944-3p   | XM_017004619 | NLRC4 | 3.41E-07    | CDS  |
| hsa-miR-3945      | XM_017004619 | NLRC4 | 2.23E-05    | CDS  |
| hsa-miR-3945      | XM_017004619 | NLRC4 | 0.003190413 | CDS  |
| hsa-miR-374c-3p   | XM_017004619 | NLRC4 | 0.00216149  | CDS  |
| hsa-miR-642b-3p   | XM_017004619 | NLRC4 | 0.003190413 | CDS  |
| hsa-miR-550b-2-5p | XM_017004619 | NLRC4 | 4.91E-06    | CDS  |
| hsa-miR-550b-2-5p | XM_017004619 | NLRC4 | 0.000297589 | CDS  |
| hsa-miR-550b-3p   | XM_017004619 | NLRC4 | 1.12E-05    | CDS  |
| hsa-miR-550b-3p   | XM_017004619 | NLRC4 | 0.01016125  | CDS  |
| hsa-miR-1268b     | XM_017004619 | NLRC4 | 0.001170791 | CDS  |
| hsa-miR-1268b     | XM_017004619 | NLRC4 | 0.001897022 | CDS  |
| hsa-miR-378e      | XM_017004619 | NLRC4 | 0.003596187 | CDS  |
| hsa-miR-378e      | XM_017004619 | NLRC4 | 0.01439129  | CDS  |
| hsa-miR-4418      | XM_017004619 | NLRC4 | 1.12E-06    | CDS  |
| hsa-miR-4418      | XM_017004619 | NLRC4 | 0.000496463 | CDS  |
| hsa-miR-378f      | XM_017004619 | NLRC4 | 0.003596187 | CDS  |
| hsa-miR-4420      | XM_017004619 | NLRC4 | 0.000552817 | CDS  |
| hsa-miR-4420      | XM_017004619 | NLRC4 | 0.0172206   | CDS  |
| hsa-miR-4421      | XM_017004619 | NLRC4 | 0.000381964 | CDS  |
| hsa-miR-4423-5p   | XM_017004619 | NLRC4 | 0.009935842 | CDS  |
| hsa-miR-4423-3p   | XM_017004619 | NLRC4 | 6.98E-06    | CDS  |
| hsa-miR-378g      | XM_017004619 | NLRC4 | 7.71E-05    | CDS  |
| hsa-miR-4425      | XM_017004619 | NLRC4 | 4.03E-05    | CDS  |
| hsa-miR-4425      | XM_017004619 | NLRC4 | 5.30E-07    | 3UTR |
| hsa-miR-4428      | XM_017004619 | NLRC4 | 0.07187657  | CDS  |
| hsa-miR-4428      | XM_017004619 | NLRC4 | 0.000163267 | CDS  |
| hsa-miR-4429      | XM_017004619 | NLRC4 | 0.00107409  | CDS  |
| hsa-miR-4430      | XM_017004619 | NLRC4 | 0.004437771 | CDS  |
| hsa-miR-4430      | XM_017004619 | NLRC4 | 0.001025993 | CDS  |
| hsa-miR-4431      | XM_017004619 | NLRC4 | 2.15E-05    | CDS  |
| hsa-miR-4433a-3p  | XM_017004619 | NLRC4 | 0.001170791 | CDS  |
| hsa-miR-4433a-3p  | XM_017004619 | NLRC4 | 0.000519233 | CDS  |
| hsa-miR-4435      | XM_017004619 | NLRC4 | 0.003650386 | CDS  |
| hsa-miR-4435      | XM_017004619 | NLRC4 | 5.60E-05    | CDS  |
| hsa-miR-4436a     | XM_017004619 | NLRC4 | 3.16E-06    | CDS  |
| hsa-miR-4436a     | XM_017004619 | NLRC4 | 3.15E-05    | CDS  |
| hsa-miR-4437      | XM_017004619 | NLRC4 | 0.0645003   | CDS  |
| hsa-miR-4439      | XM_017004619 | NLRC4 | 0.01718499  | CDS  |
| hsa-miR-4440      | XM_017004619 | NLRC4 | 0.000121469 | CDS  |
| hsa-miR-4440      | XM_017004619 | NLRC4 | 7.16E-06    | CDS  |
| hsa-miR-4440      | XM_017004619 | NLRC4 | 8.12E-06    | CDS  |
| hsa-miR-4442      | XM_017004619 | NLRC4 | 0.000126244 | CDS  |
| hsa-miR-4443      | XM_017004619 | NLRC4 | 0.01868271  | 5UTR |



|                 |              |       |             |     |
|-----------------|--------------|-------|-------------|-----|
| hsa-miR-4445-5p | XM_017004619 | NLRC4 | 1.08E-05    | CDS |
| hsa-miR-4445-5p | XM_017004619 | NLRC4 | 0.000103244 | CDS |
| hsa-miR-4446-5p | XM_017004619 | NLRC4 | 6.06E-05    | CDS |
| hsa-miR-4446-3p | XM_017004619 | NLRC4 | 0.007721901 | CDS |
| hsa-miR-4446-3p | XM_017004619 | NLRC4 | 3.34E-05    | CDS |
| hsa-miR-4447    | XM_017004619 | NLRC4 | 0.00237631  | CDS |
| hsa-miR-4447    | XM_017004619 | NLRC4 | 0.009044755 | CDS |
| hsa-miR-4447    | XM_017004619 | NLRC4 | 0.008037564 | CDS |
| hsa-miR-4448    | XM_017004619 | NLRC4 | 0.000129339 | CDS |
| hsa-miR-4448    | XM_017004619 | NLRC4 | 0.000618871 | CDS |
| hsa-miR-4449    | XM_017004619 | NLRC4 | 0.000246572 | CDS |
| hsa-miR-4449    | XM_017004619 | NLRC4 | 6.05E-07    | CDS |
| hsa-miR-4449    | XM_017004619 | NLRC4 | 6.57E-06    | CDS |
| hsa-miR-4450    | XM_017004619 | NLRC4 | 0.00177024  | CDS |
| hsa-miR-4450    | XM_017004619 | NLRC4 | 0.03151826  | CDS |
| hsa-miR-4451    | XM_017004619 | NLRC4 | 0.02421421  | CDS |
| hsa-miR-4451    | XM_017004619 | NLRC4 | 0.000755782 | CDS |
| hsa-miR-4452    | XM_017004619 | NLRC4 | 0.003529999 | CDS |
| hsa-miR-4453    | XM_017004619 | NLRC4 | 0.000156752 | CDS |
| hsa-miR-4454    | XM_017004619 | NLRC4 | 0.0264118   | CDS |
| hsa-miR-4456    | XM_017004619 | NLRC4 | 8.53E-06    | CDS |
| hsa-miR-4458    | XM_017004619 | NLRC4 | 0.08871414  | CDS |
| hsa-miR-378h    | XM_017004619 | NLRC4 | 0.003596187 | CDS |
| hsa-miR-3135b   | XM_017004619 | NLRC4 | 0.003824517 | CDS |
| hsa-miR-3135b   | XM_017004619 | NLRC4 | 0.00216149  | CDS |
| hsa-miR-4462    | XM_017004619 | NLRC4 | 0.02815115  | CDS |
| hsa-miR-4463    | XM_017004619 | NLRC4 | 0.000241027 | CDS |
| hsa-miR-4463    | XM_017004619 | NLRC4 | 0.009181635 | CDS |
| hsa-miR-4465    | XM_017004619 | NLRC4 | 0.001069961 | CDS |
| hsa-miR-4466    | XM_017004619 | NLRC4 | 8.25E-06    | CDS |
| hsa-miR-4466    | XM_017004619 | NLRC4 | 0.000608953 | CDS |
| hsa-miR-4467    | XM_017004619 | NLRC4 | 8.97E-06    | CDS |
| hsa-miR-4467    | XM_017004619 | NLRC4 | 0.008461483 | CDS |
| hsa-miR-4467    | XM_017004619 | NLRC4 | 0.002365478 | CDS |
| hsa-miR-4469    | XM_017004619 | NLRC4 | 0.000116174 | CDS |
| hsa-miR-4469    | XM_017004619 | NLRC4 | 7.01E-06    | CDS |
| hsa-miR-4472    | XM_017004619 | NLRC4 | 0.009044755 | CDS |
| hsa-miR-4472    | XM_017004619 | NLRC4 | 0.000933789 | CDS |
| hsa-miR-4474-3p | XM_017004619 | NLRC4 | 0.006712235 | CDS |
| hsa-miR-4474-3p | XM_017004619 | NLRC4 | 9.02E-06    | CDS |
| hsa-miR-4475    | XM_017004619 | NLRC4 | 0.002224226 | CDS |
| hsa-miR-4475    | XM_017004619 | NLRC4 | 5.47E-06    | CDS |
| hsa-miR-4476    | XM_017004619 | NLRC4 | 1.73E-05    | CDS |
| hsa-miR-4477b   | XM_017004619 | NLRC4 | 0.02268423  | CDS |

|                 |              |       |             |      |
|-----------------|--------------|-------|-------------|------|
| hsa-miR-4478    | XM_017004619 | NLRC4 | 0.005514936 | CDS  |
| hsa-miR-4478    | XM_017004619 | NLRC4 | 0.000598122 | CDS  |
| hsa-miR-3689d   | XM_017004619 | NLRC4 | 1.23E-05    | 3UTR |
| hsa-miR-3689d   | XM_017004619 | NLRC4 | 3.74E-07    | CDS  |
| hsa-miR-3689d   | XM_017004619 | NLRC4 | 0.000637386 | 5UTR |
| hsa-miR-3689e   | XM_017004619 | NLRC4 | 0.000169476 | CDS  |
| hsa-miR-3689f   | XM_017004619 | NLRC4 | 0.00345569  | CDS  |
| hsa-miR-4479    | XM_017004619 | NLRC4 | 0.000120896 | CDS  |
| hsa-miR-4479    | XM_017004619 | NLRC4 | 2.59E-05    | CDS  |
| hsa-miR-4479    | XM_017004619 | NLRC4 | 5.89E-05    | 3UTR |
| hsa-miR-3155b   | XM_017004619 | NLRC4 | 6.15E-05    | CDS  |
| hsa-miR-4481    | XM_017004619 | NLRC4 | 0.00237631  | CDS  |
| hsa-miR-4482-5p | XM_017004619 | NLRC4 | 1.45E-06    | 3UTR |
| hsa-miR-4482-3p | XM_017004619 | NLRC4 | 0.1307586   | 5UTR |
| hsa-miR-4482-3p | XM_017004619 | NLRC4 | 5.25E-05    | CDS  |
| hsa-miR-4483    | XM_017004619 | NLRC4 | 0.005126806 | CDS  |
| hsa-miR-4484    | XM_017004619 | NLRC4 | 0.000345859 | CDS  |
| hsa-miR-4485-5p | XM_017004619 | NLRC4 | 3.49E-05    | 3UTR |
| hsa-miR-4485-5p | XM_017004619 | NLRC4 | 8.27E-06    | CDS  |
| hsa-miR-4486    | XM_017004619 | NLRC4 | 0.00216149  | CDS  |
| hsa-miR-4486    | XM_017004619 | NLRC4 | 0.01105221  | CDS  |
| hsa-miR-4488    | XM_017004619 | NLRC4 | 0.001661235 | CDS  |
| hsa-miR-4488    | XM_017004619 | NLRC4 | 0.005514936 | CDS  |
| hsa-miR-4488    | XM_017004619 | NLRC4 | 4.99E-06    | CDS  |
| hsa-miR-4489    | XM_017004619 | NLRC4 | 0.01176218  | CDS  |
| hsa-miR-4489    | XM_017004619 | NLRC4 | 0.003706663 | CDS  |
| hsa-miR-4490    | XM_017004619 | NLRC4 | 0.001013066 | CDS  |
| hsa-miR-4491    | XM_017004619 | NLRC4 | 7.06E-05    | CDS  |
| hsa-miR-4492    | XM_017004619 | NLRC4 | 7.68E-06    | CDS  |
| hsa-miR-4492    | XM_017004619 | NLRC4 | 5.97E-06    | CDS  |
| hsa-miR-4493    | XM_017004619 | NLRC4 | 0.000337248 | 5UTR |
| hsa-miR-4494    | XM_017004619 | NLRC4 | 0.000238785 | CDS  |
| hsa-miR-4494    | XM_017004619 | NLRC4 | 1.96E-05    | CDS  |
| hsa-miR-4496    | XM_017004619 | NLRC4 | 0.005514936 | CDS  |
| hsa-miR-4496    | XM_017004619 | NLRC4 | 0.00933987  | CDS  |
| hsa-miR-4497    | XM_017004619 | NLRC4 | 3.98E-05    | CDS  |
| hsa-miR-4498    | XM_017004619 | NLRC4 | 0.001139799 | CDS  |
| hsa-miR-4498    | XM_017004619 | NLRC4 | 0.00016652  | CDS  |
| hsa-miR-4498    | XM_017004619 | NLRC4 | 0.001447161 | CDS  |
| hsa-miR-4499    | XM_017004619 | NLRC4 | 0.01730902  | CDS  |
| hsa-miR-4501    | XM_017004619 | NLRC4 | 0.000123515 | CDS  |
| hsa-miR-4501    | XM_017004619 | NLRC4 | 3.16E-05    | CDS  |
| hsa-miR-4502    | XM_017004619 | NLRC4 | 0.01388705  | CDS  |
| hsa-miR-4505    | XM_017004619 | NLRC4 | 0.001025993 | CDS  |

|                  |              |       |             |      |
|------------------|--------------|-------|-------------|------|
| hsa-miR-4506     | XM_017004619 | NLRC4 | 0.001750774 | CDS  |
| hsa-miR-4506     | XM_017004619 | NLRC4 | 0.1222725   | CDS  |
| hsa-miR-2392     | XM_017004619 | NLRC4 | 8.25E-06    | CDS  |
| hsa-miR-2392     | XM_017004619 | NLRC4 | 0.000346237 | 5UTR |
| hsa-miR-2392     | XM_017004619 | NLRC4 | 0.01924989  | CDS  |
| hsa-miR-4507     | XM_017004619 | NLRC4 | 1.46E-05    | CDS  |
| hsa-miR-4507     | XM_017004619 | NLRC4 | 0.01465807  | CDS  |
| hsa-miR-4507     | XM_017004619 | NLRC4 | 7.71E-05    | CDS  |
| hsa-miR-4508     | XM_017004619 | NLRC4 | 1.24E-05    | CDS  |
| hsa-miR-4510     | XM_017004619 | NLRC4 | 0.000153868 | CDS  |
| hsa-miR-4510     | XM_017004619 | NLRC4 | 0.02741169  | CDS  |
| hsa-miR-4511     | XM_017004619 | NLRC4 | 0.003385126 | CDS  |
| hsa-miR-4512     | XM_017004619 | NLRC4 | 0.001727314 | CDS  |
| hsa-miR-4513     | XM_017004619 | NLRC4 | 0.000241027 | CDS  |
| hsa-miR-4514     | XM_017004619 | NLRC4 | 0.1067239   | CDS  |
| hsa-miR-4515     | XM_017004619 | NLRC4 | 3.58E-06    | CDS  |
| hsa-miR-4516     | XM_017004619 | NLRC4 | 0.07702311  | CDS  |
| hsa-miR-4516     | XM_017004619 | NLRC4 | 8.25E-06    | CDS  |
| hsa-miR-4518     | XM_017004619 | NLRC4 | 0.07041108  | CDS  |
| hsa-miR-4518     | XM_017004619 | NLRC4 | 0.009066731 | CDS  |
| hsa-miR-4519     | XM_017004619 | NLRC4 | 0.004110503 | CDS  |
| hsa-miR-4519     | XM_017004619 | NLRC4 | 1.33E-07    | CDS  |
| hsa-miR-4520-5p  | XM_017004619 | NLRC4 | 0.000107277 | CDS  |
| hsa-miR-4520-5p  | XM_017004619 | NLRC4 | 0.03271231  | CDS  |
| hsa-miR-4520-5p  | XM_017004619 | NLRC4 | 0.006567177 | CDS  |
| hsa-miR-1269b    | XM_017004619 | NLRC4 | 0.000238785 | CDS  |
| hsa-miR-4522     | XM_017004619 | NLRC4 | 5.78E-07    | CDS  |
| hsa-miR-4522     | XM_017004619 | NLRC4 | 5.54E-06    | CDS  |
| hsa-miR-4522     | XM_017004619 | NLRC4 | 2.94E-05    | CDS  |
| hsa-miR-4523     | XM_017004619 | NLRC4 | 0.004958121 | CDS  |
| hsa-miR-4523     | XM_017004619 | NLRC4 | 0.002744589 | CDS  |
| hsa-miR-4524a-5p | XM_017004619 | NLRC4 | 0.000217711 | CDS  |
| hsa-miR-4525     | XM_017004619 | NLRC4 | 6.08E-05    | CDS  |
| hsa-miR-4526     | XM_017004619 | NLRC4 | 0.0101559   | CDS  |
| hsa-miR-4526     | XM_017004619 | NLRC4 | 1.77E-06    | CDS  |
| hsa-miR-4529-5p  | XM_017004619 | NLRC4 | 3.58E-06    | CDS  |
| hsa-miR-4529-3p  | XM_017004619 | NLRC4 | 0.000104356 | CDS  |
| hsa-miR-4529-3p  | XM_017004619 | NLRC4 | 0.03484916  | CDS  |
| hsa-miR-4530     | XM_017004619 | NLRC4 | 1.52E-06    | CDS  |
| hsa-miR-4530     | XM_017004619 | NLRC4 | 0.008073378 | CDS  |
| hsa-miR-4533     | XM_017004619 | NLRC4 | 0.01842555  | CDS  |
| hsa-miR-4534     | XM_017004619 | NLRC4 | 0.01924989  | CDS  |
| hsa-miR-4534     | XM_017004619 | NLRC4 | 0.01001738  | CDS  |
| hsa-miR-4535     | XM_017004619 | NLRC4 | 0.005514936 | CDS  |

|                 |              |       |             |      |
|-----------------|--------------|-------|-------------|------|
| hsa-miR-4535    | XM_017004619 | NLRC4 | 6.20E-05    | CDS  |
| hsa-miR-1587    | XM_017004619 | NLRC4 | 1.46E-05    | CDS  |
| hsa-miR-1587    | XM_017004619 | NLRC4 | 0.0645003   | CDS  |
| hsa-miR-1587    | XM_017004619 | NLRC4 | 0.1399983   | CDS  |
| hsa-miR-4537    | XM_017004619 | NLRC4 | 0.01247752  | CDS  |
| hsa-miR-4537    | XM_017004619 | NLRC4 | 8.56E-06    | CDS  |
| hsa-miR-4538    | XM_017004619 | NLRC4 | 0.001031207 | CDS  |
| hsa-miR-4538    | XM_017004619 | NLRC4 | 0.009768947 | CDS  |
| hsa-miR-4539    | XM_017004619 | NLRC4 | 0.001027397 | CDS  |
| hsa-miR-3960    | XM_017004619 | NLRC4 | 0.001025993 | CDS  |
| hsa-miR-3960    | XM_017004619 | NLRC4 | 0.000407782 | CDS  |
| hsa-miR-3972    | XM_017004619 | NLRC4 | 1.22E-05    | CDS  |
| hsa-miR-3972    | XM_017004619 | NLRC4 | 0.000495206 | CDS  |
| hsa-miR-3972    | XM_017004619 | NLRC4 | 6.12E-05    | 3UTR |
| hsa-miR-3978    | XM_017004619 | NLRC4 | 0.000345859 | CDS  |
| hsa-miR-4632-5p | XM_017004619 | NLRC4 | 0.000133333 | CDS  |
| hsa-miR-4632-5p | XM_017004619 | NLRC4 | 0.009993837 | CDS  |
| hsa-miR-4632-3p | XM_017004619 | NLRC4 | 5.87E-05    | CDS  |
| hsa-miR-4632-3p | XM_017004619 | NLRC4 | 0.000126244 | CDS  |
| hsa-miR-4632-3p | XM_017004619 | NLRC4 | 6.02E-06    | CDS  |
| hsa-miR-4632-3p | XM_017004619 | NLRC4 | 4.84E-07    | CDS  |
| hsa-miR-4633-5p | XM_017004619 | NLRC4 | 0.01388229  | CDS  |
| hsa-miR-4633-5p | XM_017004619 | NLRC4 | 0.004730357 | CDS  |
| hsa-miR-4633-3p | XM_017004619 | NLRC4 | 4.59E-05    | CDS  |
| hsa-miR-4633-3p | XM_017004619 | NLRC4 | 3.68E-05    | CDS  |
| hsa-miR-4634    | XM_017004619 | NLRC4 | 2.59E-05    | CDS  |
| hsa-miR-4634    | XM_017004619 | NLRC4 | 6.67E-05    | CDS  |
| hsa-miR-4638-3p | XM_017004619 | NLRC4 | 0.01801811  | CDS  |
| hsa-miR-4638-3p | XM_017004619 | NLRC4 | 7.51E-07    | CDS  |
| hsa-miR-4640-5p | XM_017004619 | NLRC4 | 0.001447161 | CDS  |
| hsa-miR-4640-3p | XM_017004619 | NLRC4 | 0.001218159 | CDS  |
| hsa-miR-4640-3p | XM_017004619 | NLRC4 | 0.000381964 | CDS  |
| hsa-miR-4640-3p | XM_017004619 | NLRC4 | 4.84E-07    | CDS  |
| hsa-miR-4641    | XM_017004619 | NLRC4 | 0.00014298  | CDS  |
| hsa-miR-4641    | XM_017004619 | NLRC4 | 3.43E-05    | 3UTR |
| hsa-miR-4642    | XM_017004619 | NLRC4 | 0.003651178 | CDS  |
| hsa-miR-4645-3p | XM_017004619 | NLRC4 | 0.007995041 | CDS  |
| hsa-miR-4646-5p | XM_017004619 | NLRC4 | 0.08241963  | CDS  |
| hsa-miR-4646-5p | XM_017004619 | NLRC4 | 0.00107409  | CDS  |
| hsa-miR-4646-5p | XM_017004619 | NLRC4 | 0.001031207 | CDS  |
| hsa-miR-4646-5p | XM_017004619 | NLRC4 | 3.41E-07    | CDS  |
| hsa-miR-4647    | XM_017004619 | NLRC4 | 0.000123213 | CDS  |
| hsa-miR-4647    | XM_017004619 | NLRC4 | 0.000297589 | CDS  |
| hsa-miR-4647    | XM_017004619 | NLRC4 | 0.000755782 | CDS  |

|                  |              |       |             |      |
|------------------|--------------|-------|-------------|------|
| hsa-miR-4649-5p  | XM_017004619 | NLRC4 | 0.001447161 | CDS  |
| hsa-miR-4649-5p  | XM_017004619 | NLRC4 | 0.000293001 | CDS  |
| hsa-miR-4649-3p  | XM_017004619 | NLRC4 | 0.007691023 | CDS  |
| hsa-miR-4650-5p  | XM_017004619 | NLRC4 | 0.000772438 | CDS  |
| hsa-miR-4650-3p  | XM_017004619 | NLRC4 | 0.000133333 | CDS  |
| hsa-miR-4651     | XM_017004619 | NLRC4 | 0.008073378 | CDS  |
| hsa-miR-4652-5p  | XM_017004619 | NLRC4 | 0.001661235 | CDS  |
| hsa-miR-4652-3p  | XM_017004619 | NLRC4 | 0.00033047  | CDS  |
| hsa-miR-4653-3p  | XM_017004619 | NLRC4 | 0.002206803 | CDS  |
| hsa-miR-4654     | XM_017004619 | NLRC4 | 0.000743386 | CDS  |
| hsa-miR-4654     | XM_017004619 | NLRC4 | 0.01545477  | CDS  |
| hsa-miR-4655-5p  | XM_017004619 | NLRC4 | 0.01479238  | CDS  |
| hsa-miR-4655-5p  | XM_017004619 | NLRC4 | 1.96E-05    | CDS  |
| hsa-miR-4655-3p  | XM_017004619 | NLRC4 | 7.76E-05    | CDS  |
| hsa-miR-4656     | XM_017004619 | NLRC4 | 3.41E-07    | CDS  |
| hsa-miR-4656     | XM_017004619 | NLRC4 | 0.000755782 | CDS  |
| hsa-miR-4657     | XM_017004619 | NLRC4 | 7.85E-05    | CDS  |
| hsa-miR-4657     | XM_017004619 | NLRC4 | 0.02308038  | CDS  |
| hsa-miR-4658     | XM_017004619 | NLRC4 | 3.74E-07    | CDS  |
| hsa-miR-4658     | XM_017004619 | NLRC4 | 0.04484888  | CDS  |
| hsa-miR-4659a-5p | XM_017004619 | NLRC4 | 3.49E-05    | 3UTR |
| hsa-miR-4660     | XM_017004619 | NLRC4 | 1.43E-05    | CDS  |
| hsa-miR-4661-3p  | XM_017004619 | NLRC4 | 7.01E-06    | CDS  |
| hsa-miR-4662a-5p | XM_017004619 | NLRC4 | 0.000993094 | CDS  |
| hsa-miR-4662a-5p | XM_017004619 | NLRC4 | 0.0002043   | 5UTR |
| hsa-miR-4663     | XM_017004619 | NLRC4 | 0.00037471  | CDS  |
| hsa-miR-4664-3p  | XM_017004619 | NLRC4 | 0.000158814 | CDS  |
| hsa-miR-4664-3p  | XM_017004619 | NLRC4 | 0.002940157 | CDS  |
| hsa-miR-4664-3p  | XM_017004619 | NLRC4 | 6.44E-07    | CDS  |
| hsa-miR-4664-3p  | XM_017004619 | NLRC4 | 0.04679531  | 5UTR |
| hsa-miR-4665-5p  | XM_017004619 | NLRC4 | 1.46E-05    | CDS  |
| hsa-miR-4665-5p  | XM_017004619 | NLRC4 | 7.71E-05    | CDS  |
| hsa-miR-4665-3p  | XM_017004619 | NLRC4 | 0.001031207 | CDS  |
| hsa-miR-4665-3p  | XM_017004619 | NLRC4 | 2.94E-05    | CDS  |
| hsa-miR-4667-5p  | XM_017004619 | NLRC4 | 0.04319399  | CDS  |
| hsa-miR-4667-5p  | XM_017004619 | NLRC4 | 4.41E-05    | CDS  |
| hsa-miR-4667-3p  | XM_017004619 | NLRC4 | 0.0210857   | CDS  |
| hsa-miR-219b-5p  | XM_017004619 | NLRC4 | 1.56E-05    | CDS  |
| hsa-miR-4669     | XM_017004619 | NLRC4 | 7.53E-05    | CDS  |
| hsa-miR-4669     | XM_017004619 | NLRC4 | 0.01110275  | CDS  |
| hsa-miR-4669     | XM_017004619 | NLRC4 | 0.001372113 | CDS  |
| hsa-miR-4670-3p  | XM_017004619 | NLRC4 | 0.005519711 | CDS  |
| hsa-miR-4672     | XM_017004619 | NLRC4 | 0.000536357 | CDS  |
| hsa-miR-4673     | XM_017004619 | NLRC4 | 1.45E-06    | 3UTR |

|                 |              |       |             |      |
|-----------------|--------------|-------|-------------|------|
| hsa-miR-4673    | XM_017004619 | NLRC4 | 1.38E-07    | CDS  |
| hsa-miR-4674    | XM_017004619 | NLRC4 | 4.98E-06    | CDS  |
| hsa-miR-4674    | XM_017004619 | NLRC4 | 1.46E-05    | CDS  |
| hsa-miR-4674    | XM_017004619 | NLRC4 | 6.15E-05    | CDS  |
| hsa-miR-4676-3p | XM_017004619 | NLRC4 | 3.07E-05    | CDS  |
| hsa-miR-4676-3p | XM_017004619 | NLRC4 | 0.000535268 | CDS  |
| hsa-miR-4677-5p | XM_017004619 | NLRC4 | 0.001083295 | CDS  |
| hsa-miR-4677-5p | XM_017004619 | NLRC4 | 0.01912106  | CDS  |
| hsa-miR-4677-5p | XM_017004619 | NLRC4 | 5.29E-05    | 3UTR |
| hsa-miR-4681    | XM_017004619 | NLRC4 | 0.00216149  | CDS  |
| hsa-miR-4681    | XM_017004619 | NLRC4 | 0.004509441 | CDS  |
| hsa-miR-4682    | XM_017004619 | NLRC4 | 0.000121117 | CDS  |
| hsa-miR-4682    | XM_017004619 | NLRC4 | 5.45E-06    | CDS  |
| hsa-miR-4682    | XM_017004619 | NLRC4 | 0.01048706  | CDS  |
| hsa-miR-4683    | XM_017004619 | NLRC4 | 5.34E-05    | CDS  |
| hsa-miR-4684-5p | XM_017004619 | NLRC4 | 3.07E-05    | CDS  |
| hsa-miR-4685-5p | XM_017004619 | NLRC4 | 3.78E-05    | CDS  |
| hsa-miR-4685-5p | XM_017004619 | NLRC4 | 0.007721901 | CDS  |
| hsa-miR-4685-5p | XM_017004619 | NLRC4 | 0.000326334 | CDS  |
| hsa-miR-4685-3p | XM_017004619 | NLRC4 | 0.000583201 | CDS  |
| hsa-miR-4686    | XM_017004619 | NLRC4 | 0.000108746 | 3UTR |
| hsa-miR-4687-3p | XM_017004619 | NLRC4 | 2.51E-05    | CDS  |
| hsa-miR-4687-3p | XM_017004619 | NLRC4 | 0.01105221  | CDS  |
| hsa-miR-4687-3p | XM_017004619 | NLRC4 | 0.00116715  | CDS  |
| hsa-miR-1343-5p | XM_017004619 | NLRC4 | 0.002815688 | CDS  |
| hsa-miR-1343-3p | XM_017004619 | NLRC4 | 0.000107277 | CDS  |
| hsa-miR-1343-3p | XM_017004619 | NLRC4 | 0.000244245 | CDS  |
| hsa-miR-4688    | XM_017004619 | NLRC4 | 0.01473863  | CDS  |
| hsa-miR-4688    | XM_017004619 | NLRC4 | 9.25E-07    | CDS  |
| hsa-miR-4688    | XM_017004619 | NLRC4 | 0.000161338 | CDS  |
| hsa-miR-4689    | XM_017004619 | NLRC4 | 4.41E-05    | CDS  |
| hsa-miR-4689    | XM_017004619 | NLRC4 | 0.0696302   | CDS  |
| hsa-miR-4689    | XM_017004619 | NLRC4 | 0.01000834  | CDS  |
| hsa-miR-4690-5p | XM_017004619 | NLRC4 | 0.000133333 | CDS  |
| hsa-miR-4690-3p | XM_017004619 | NLRC4 | 6.39E-05    | CDS  |
| hsa-miR-4690-3p | XM_017004619 | NLRC4 | 0.000217711 | CDS  |
| hsa-miR-4691-5p | XM_017004619 | NLRC4 | 0.000239915 | CDS  |
| hsa-miR-4691-5p | XM_017004619 | NLRC4 | 0.000125663 | CDS  |
| hsa-miR-4691-5p | XM_017004619 | NLRC4 | 0.001383748 | CDS  |
| hsa-miR-4691-3p | XM_017004619 | NLRC4 | 1.83E-05    | CDS  |
| hsa-miR-4692    | XM_017004619 | NLRC4 | 2.75E-07    | CDS  |
| hsa-miR-4693-3p | XM_017004619 | NLRC4 | 0.000205155 | CDS  |
| hsa-miR-4695-5p | XM_017004619 | NLRC4 | 1.73E-05    | CDS  |
| hsa-miR-4695-5p | XM_017004619 | NLRC4 | 0.01250097  | CDS  |

|                 |              |       |             |      |
|-----------------|--------------|-------|-------------|------|
| hsa-miR-4695-3p | XM_017004619 | NLRC4 | 1.59E-05    | 3UTR |
| hsa-miR-4697-3p | XM_017004619 | NLRC4 | 2.08E-05    | CDS  |
| hsa-miR-4700-5p | XM_017004619 | NLRC4 | 0.02204899  | 5UTR |
| hsa-miR-4701-3p | XM_017004619 | NLRC4 | 8.25E-06    | CDS  |
| hsa-miR-4705    | XM_017004619 | NLRC4 | 6.65E-06    | CDS  |
| hsa-miR-4706    | XM_017004619 | NLRC4 | 0.000855203 | CDS  |
| hsa-miR-4706    | XM_017004619 | NLRC4 | 0.004509441 | CDS  |
| hsa-miR-4707-5p | XM_017004619 | NLRC4 | 0.001499137 | CDS  |
| hsa-miR-4707-5p | XM_017004619 | NLRC4 | 6.57E-06    | CDS  |
| hsa-miR-4707-5p | XM_017004619 | NLRC4 | 0.001548002 | CDS  |
| hsa-miR-4707-3p | XM_017004619 | NLRC4 | 3.58E-06    | CDS  |
| hsa-miR-4708-5p | XM_017004619 | NLRC4 | 0.000123213 | CDS  |
| hsa-miR-4708-3p | XM_017004619 | NLRC4 | 7.45E-06    | CDS  |
| hsa-miR-4709-3p | XM_017004619 | NLRC4 | 0.004849261 | CDS  |
| hsa-miR-4709-3p | XM_017004619 | NLRC4 | 0.01220348  | CDS  |
| hsa-miR-203b-5p | XM_017004619 | NLRC4 | 2.65E-05    | CDS  |
| hsa-miR-4710    | XM_017004619 | NLRC4 | 8.25E-06    | CDS  |
| hsa-miR-4710    | XM_017004619 | NLRC4 | 0.009044755 | CDS  |
| hsa-miR-4710    | XM_017004619 | NLRC4 | 0.001028636 | CDS  |
| hsa-miR-4711-5p | XM_017004619 | NLRC4 | 0.000668222 | 5UTR |
| hsa-miR-4711-3p | XM_017004619 | NLRC4 | 0.000802077 | CDS  |
| hsa-miR-4711-3p | XM_017004619 | NLRC4 | 0.01050676  | CDS  |
| hsa-miR-4711-3p | XM_017004619 | NLRC4 | 0.04836105  | CDS  |
| hsa-miR-4712-5p | XM_017004619 | NLRC4 | 0.000369226 | 3UTR |
| hsa-miR-4713-5p | XM_017004619 | NLRC4 | 0.001035763 | CDS  |
| hsa-miR-4713-5p | XM_017004619 | NLRC4 | 0.000106281 | CDS  |
| hsa-miR-4713-5p | XM_017004619 | NLRC4 | 0.000245493 | CDS  |
| hsa-miR-4713-3p | XM_017004619 | NLRC4 | 0.01708205  | CDS  |
| hsa-miR-4713-3p | XM_017004619 | NLRC4 | 0.001633284 | CDS  |
| hsa-miR-4714-5p | XM_017004619 | NLRC4 | 3.09E-05    | CDS  |
| hsa-miR-4714-3p | XM_017004619 | NLRC4 | 5.95E-05    | CDS  |
| hsa-miR-4714-3p | XM_017004619 | NLRC4 | 7.28E-06    | CDS  |
| hsa-miR-4714-3p | XM_017004619 | NLRC4 | 0.000123462 | CDS  |
| hsa-miR-4715-5p | XM_017004619 | NLRC4 | 1.77E-06    | CDS  |
| hsa-miR-4715-5p | XM_017004619 | NLRC4 | 0.003864711 | CDS  |
| hsa-miR-4715-3p | XM_017004619 | NLRC4 | 0.000368725 | CDS  |
| hsa-miR-4715-3p | XM_017004619 | NLRC4 | 8.36E-06    | CDS  |
| hsa-miR-4716-5p | XM_017004619 | NLRC4 | 0.01199923  | CDS  |
| hsa-miR-4716-3p | XM_017004619 | NLRC4 | 0.05553747  | CDS  |
| hsa-miR-3529-5p | XM_017004619 | NLRC4 | 0.001077566 | 5UTR |
| hsa-miR-4717-5p | XM_017004619 | NLRC4 | 5.85E-06    | CDS  |
| hsa-miR-4717-5p | XM_017004619 | NLRC4 | 0.001447161 | CDS  |
| hsa-miR-4721    | XM_017004619 | NLRC4 | 5.49E-05    | CDS  |
| hsa-miR-4721    | XM_017004619 | NLRC4 | 7.19E-05    | CDS  |

|                 |              |       |             |      |
|-----------------|--------------|-------|-------------|------|
| hsa-miR-4721    | XM_017004619 | NLRC4 | 0.000671559 | CDS  |
| hsa-miR-4722-5p | XM_017004619 | NLRC4 | 1.85E-05    | CDS  |
| hsa-miR-4722-5p | XM_017004619 | NLRC4 | 8.69E-06    | CDS  |
| hsa-miR-4722-3p | XM_017004619 | NLRC4 | 6.12E-05    | 3UTR |
| hsa-miR-4722-3p | XM_017004619 | NLRC4 | 7.91E-05    | CDS  |
| hsa-miR-4723-5p | XM_017004619 | NLRC4 | 0.000135949 | CDS  |
| hsa-miR-4723-5p | XM_017004619 | NLRC4 | 4.66E-05    | CDS  |
| hsa-miR-4723-5p | XM_017004619 | NLRC4 | 0.001661235 | CDS  |
| hsa-miR-4723-3p | XM_017004619 | NLRC4 | 0.001383748 | CDS  |
| hsa-miR-4723-3p | XM_017004619 | NLRC4 | 0.00014298  | CDS  |
| hsa-miR-451b    | XM_017004619 | NLRC4 | 9.54E-06    | CDS  |
| hsa-miR-4724-5p | XM_017004619 | NLRC4 | 0.01048706  | CDS  |
| hsa-miR-4724-3p | XM_017004619 | NLRC4 | 8.56E-06    | CDS  |
| hsa-miR-4724-3p | XM_017004619 | NLRC4 | 1.88E-05    | CDS  |
| hsa-miR-4725-5p | XM_017004619 | NLRC4 | 0.00372152  | CDS  |
| hsa-miR-4725-3p | XM_017004619 | NLRC4 | 0.004958121 | CDS  |
| hsa-miR-4726-5p | XM_017004619 | NLRC4 | 3.41E-07    | CDS  |
| hsa-miR-4726-5p | XM_017004619 | NLRC4 | 0.02447189  | CDS  |
| hsa-miR-4726-3p | XM_017004619 | NLRC4 | 7.76E-05    | CDS  |
| hsa-miR-4726-3p | XM_017004619 | NLRC4 | 1.04E-05    | CDS  |
| hsa-miR-4726-3p | XM_017004619 | NLRC4 | 0.000166253 | CDS  |
| hsa-miR-4727-5p | XM_017004619 | NLRC4 | 8.36E-05    | 3UTR |
| hsa-miR-4727-5p | XM_017004619 | NLRC4 | 7.95E-06    | CDS  |
| hsa-miR-4727-5p | XM_017004619 | NLRC4 | 6.54E-06    | CDS  |
| hsa-miR-4727-3p | XM_017004619 | NLRC4 | 6.67E-05    | CDS  |
| hsa-miR-4728-5p | XM_017004619 | NLRC4 | 9.13E-05    | CDS  |
| hsa-miR-4728-5p | XM_017004619 | NLRC4 | 0.009056833 | CDS  |
| hsa-miR-4728-5p | XM_017004619 | NLRC4 | 0.02468582  | CDS  |
| hsa-miR-4728-3p | XM_017004619 | NLRC4 | 0.01363586  | CDS  |
| hsa-miR-4731-5p | XM_017004619 | NLRC4 | 0.001014772 | CDS  |
| hsa-miR-4731-3p | XM_017004619 | NLRC4 | 2.79E-05    | CDS  |
| hsa-miR-4732-3p | XM_017004619 | NLRC4 | 0.001218159 | CDS  |
| hsa-miR-4732-3p | XM_017004619 | NLRC4 | 1.82E-06    | CDS  |
| hsa-miR-4733-3p | XM_017004619 | NLRC4 | 3.49E-05    | 3UTR |
| hsa-miR-4734    | XM_017004619 | NLRC4 | 2.92E-05    | CDS  |
| hsa-miR-4734    | XM_017004619 | NLRC4 | 5.25E-06    | CDS  |
| hsa-miR-4736    | XM_017004619 | NLRC4 | 0.000110317 | CDS  |
| hsa-miR-4736    | XM_017004619 | NLRC4 | 0.01837384  | CDS  |
| hsa-miR-4736    | XM_017004619 | NLRC4 | 0.001037091 | CDS  |
| hsa-miR-4737    | XM_017004619 | NLRC4 | 9.35E-05    | CDS  |
| hsa-miR-3064-5p | XM_017004619 | NLRC4 | 1.70E-05    | CDS  |
| hsa-miR-3064-5p | XM_017004619 | NLRC4 | 2.90E-06    | CDS  |
| hsa-miR-3064-3p | XM_017004619 | NLRC4 | 2.83E-05    | CDS  |
| hsa-miR-3064-3p | XM_017004619 | NLRC4 | 7.38E-05    | CDS  |



|                 |              |       |             |      |
|-----------------|--------------|-------|-------------|------|
| hsa-miR-4738-5p | XM_017004619 | NLRC4 | 0.001466882 | CDS  |
| hsa-miR-4738-3p | XM_017004619 | NLRC4 | 4.41E-05    | CDS  |
| hsa-miR-4738-3p | XM_017004619 | NLRC4 | 0.01195042  | CDS  |
| hsa-miR-4739    | XM_017004619 | NLRC4 | 0.01542657  | CDS  |
| hsa-miR-4740-5p | XM_017004619 | NLRC4 | 1.01E-05    | CDS  |
| hsa-miR-4740-5p | XM_017004619 | NLRC4 | 1.24E-05    | CDS  |
| hsa-miR-4740-3p | XM_017004619 | NLRC4 | 0.001054134 | CDS  |
| hsa-miR-4741    | XM_017004619 | NLRC4 | 3.41E-07    | CDS  |
| hsa-miR-4741    | XM_017004619 | NLRC4 | 0.000115293 | CDS  |
| hsa-miR-4741    | XM_017004619 | NLRC4 | 6.21E-05    | CDS  |
| hsa-miR-4742-5p | XM_017004619 | NLRC4 | 0.01519719  | CDS  |
| hsa-miR-4742-3p | XM_017004619 | NLRC4 | 0.01223285  | CDS  |
| hsa-miR-4742-3p | XM_017004619 | NLRC4 | 0.000235004 | CDS  |
| hsa-miR-4743-5p | XM_017004619 | NLRC4 | 0.001025993 | CDS  |
| hsa-miR-4743-3p | XM_017004619 | NLRC4 | 0.000787757 | CDS  |
| hsa-miR-4743-3p | XM_017004619 | NLRC4 | 0.000455398 | CDS  |
| hsa-miR-4743-3p | XM_017004619 | NLRC4 | 0.000352314 | CDS  |
| hsa-miR-4745-5p | XM_017004619 | NLRC4 | 1.12E-05    | CDS  |
| hsa-miR-4745-5p | XM_017004619 | NLRC4 | 0.000112833 | CDS  |
| hsa-miR-4745-5p | XM_017004619 | NLRC4 | 0.000171267 | CDS  |
| hsa-miR-4745-3p | XM_017004619 | NLRC4 | 1.47E-05    | CDS  |
| hsa-miR-4746-5p | XM_017004619 | NLRC4 | 0.000423087 | CDS  |
| hsa-miR-4746-5p | XM_017004619 | NLRC4 | 0.006122178 | CDS  |
| hsa-miR-4746-5p | XM_017004619 | NLRC4 | 8.53E-06    | CDS  |
| hsa-miR-4746-3p | XM_017004619 | NLRC4 | 7.45E-06    | CDS  |
| hsa-miR-4746-3p | XM_017004619 | NLRC4 | 0.000233688 | CDS  |
| hsa-miR-4746-3p | XM_017004619 | NLRC4 | 1.00E-06    | CDS  |
| hsa-miR-4746-3p | XM_017004619 | NLRC4 | 0.000216501 | CDS  |
| hsa-miR-4747-5p | XM_017004619 | NLRC4 | 0.07138354  | CDS  |
| hsa-miR-4747-5p | XM_017004619 | NLRC4 | 0.000654256 | CDS  |
| hsa-miR-4747-3p | XM_017004619 | NLRC4 | 0.00037471  | CDS  |
| hsa-miR-4747-3p | XM_017004619 | NLRC4 | 5.89E-05    | 3UTR |
| hsa-miR-4747-3p | XM_017004619 | NLRC4 | 1.41E-06    | 3UTR |
| hsa-miR-4748    | XM_017004619 | NLRC4 | 0.0645003   | CDS  |
| hsa-miR-4748    | XM_017004619 | NLRC4 | 0.000334534 | CDS  |
| hsa-miR-4748    | XM_017004619 | NLRC4 | 0.000598122 | CDS  |
| hsa-miR-4748    | XM_017004619 | NLRC4 | 0.002871608 | CDS  |
| hsa-miR-4749-5p | XM_017004619 | NLRC4 | 0.001014772 | CDS  |
| hsa-miR-4749-3p | XM_017004619 | NLRC4 | 7.69E-06    | CDS  |
| hsa-miR-4750-5p | XM_017004619 | NLRC4 | 0.000211789 | CDS  |
| hsa-miR-4750-5p | XM_017004619 | NLRC4 | 0.02675239  | CDS  |
| hsa-miR-4750-3p | XM_017004619 | NLRC4 | 7.91E-05    | CDS  |
| hsa-miR-4751    | XM_017004619 | NLRC4 | 0.000122342 | CDS  |
| hsa-miR-4751    | XM_017004619 | NLRC4 | 0.005514936 | CDS  |

|                  |              |       |             |      |
|------------------|--------------|-------|-------------|------|
| hsa-miR-4753-5p  | XM_017004619 | NLRC4 | 0.000137416 | CDS  |
| hsa-miR-4754     | XM_017004619 | NLRC4 | 0.000150393 | CDS  |
| hsa-miR-4754     | XM_017004619 | NLRC4 | 0.03273842  | CDS  |
| hsa-miR-4755-5p  | XM_017004619 | NLRC4 | 2.02E-05    | CDS  |
| hsa-miR-4755-5p  | XM_017004619 | NLRC4 | 4.27E-05    | CDS  |
| hsa-miR-4755-5p  | XM_017004619 | NLRC4 | 0.008762609 | CDS  |
| hsa-miR-4755-3p  | XM_017004619 | NLRC4 | 0.00043678  | CDS  |
| hsa-miR-4755-3p  | XM_017004619 | NLRC4 | 4.03E-05    | CDS  |
| hsa-miR-4755-3p  | XM_017004619 | NLRC4 | 6.15E-05    | CDS  |
| hsa-miR-4756-5p  | XM_017004619 | NLRC4 | 6.44E-05    | CDS  |
| hsa-miR-4757-5p  | XM_017004619 | NLRC4 | 0.000740642 | CDS  |
| hsa-miR-4757-5p  | XM_017004619 | NLRC4 | 1.59E-05    | 5UTR |
| hsa-miR-4757-3p  | XM_017004619 | NLRC4 | 0.02364189  | 5UTR |
| hsa-miR-4758-5p  | XM_017004619 | NLRC4 | 0.000855203 | CDS  |
| hsa-miR-4758-5p  | XM_017004619 | NLRC4 | 8.75E-06    | CDS  |
| hsa-miR-4758-3p  | XM_017004619 | NLRC4 | 6.41E-06    | CDS  |
| hsa-miR-4759     | XM_017004619 | NLRC4 | 0.000483629 | CDS  |
| hsa-miR-4761-5p  | XM_017004619 | NLRC4 | 2.19E-05    | 3UTR |
| hsa-miR-4761-3p  | XM_017004619 | NLRC4 | 0.002744589 | CDS  |
| hsa-miR-4761-3p  | XM_017004619 | NLRC4 | 2.69E-06    | CDS  |
| hsa-miR-4762-3p  | XM_017004619 | NLRC4 | 0.04292876  | CDS  |
| hsa-miR-4763-5p  | XM_017004619 | NLRC4 | 4.11E-05    | 3UTR |
| hsa-miR-4763-5p  | XM_017004619 | NLRC4 | 2.98E-05    | CDS  |
| hsa-miR-4763-3p  | XM_017004619 | NLRC4 | 1.00E-06    | CDS  |
| hsa-miR-4764-3p  | XM_017004619 | NLRC4 | 7.48E-07    | CDS  |
| hsa-miR-4766-5p  | XM_017004619 | NLRC4 | 0.006869599 | CDS  |
| hsa-miR-4767     | XM_017004619 | NLRC4 | 7.08E-06    | CDS  |
| hsa-miR-4767     | XM_017004619 | NLRC4 | 2.92E-05    | CDS  |
| hsa-miR-4768-5p  | XM_017004619 | NLRC4 | 0.01501814  | CDS  |
| hsa-miR-4768-3p  | XM_017004619 | NLRC4 | 0.01479238  | CDS  |
| hsa-miR-4769-5p  | XM_017004619 | NLRC4 | 0.01730902  | CDS  |
| hsa-miR-4769-5p  | XM_017004619 | NLRC4 | 2.51E-05    | CDS  |
| hsa-miR-4771     | XM_017004619 | NLRC4 | 2.01E-05    | CDS  |
| hsa-miR-4776-5p  | XM_017004619 | NLRC4 | 0.003450568 | CDS  |
| hsa-miR-4776-3p  | XM_017004619 | NLRC4 | 4.84E-07    | CDS  |
| hsa-miR-4776-3p  | XM_017004619 | NLRC4 | 1.35E-05    | CDS  |
| hsa-miR-4777-3p  | XM_017004619 | NLRC4 | 7.01E-06    | CDS  |
| hsa-miR-4778-3p  | XM_017004619 | NLRC4 | 6.20E-07    | CDS  |
| hsa-miR-4436b-5p | XM_017004619 | NLRC4 | 8.86E-07    | CDS  |
| hsa-miR-4436b-5p | XM_017004619 | NLRC4 | 0.000406012 | 3UTR |
| hsa-miR-4436b-3p | XM_017004619 | NLRC4 | 0.000671559 | CDS  |
| hsa-miR-4436b-3p | XM_017004619 | NLRC4 | 0.003130718 | CDS  |
| hsa-miR-4781-5p  | XM_017004619 | NLRC4 | 0.003523479 | 5UTR |
| hsa-miR-4781-5p  | XM_017004619 | NLRC4 | 0.000217711 | CDS  |

|                  |              |       |             |      |
|------------------|--------------|-------|-------------|------|
| hsa-miR-4781-5p  | XM_017004619 | NLRC4 | 7.38E-06    | CDS  |
| hsa-miR-4781-3p  | XM_017004619 | NLRC4 | 0.01363586  | CDS  |
| hsa-miR-4781-3p  | XM_017004619 | NLRC4 | 0.000406814 | CDS  |
| hsa-miR-4783-5p  | XM_017004619 | NLRC4 | 1.36E-05    | 3UTR |
| hsa-miR-4783-5p  | XM_017004619 | NLRC4 | 0.00151455  | CDS  |
| hsa-miR-4783-3p  | XM_017004619 | NLRC4 | 1.12E-05    | CDS  |
| hsa-miR-4783-3p  | XM_017004619 | NLRC4 | 0.000120896 | CDS  |
| hsa-miR-4784     | XM_017004619 | NLRC4 | 0.000297589 | CDS  |
| hsa-miR-4784     | XM_017004619 | NLRC4 | 0.007362526 | CDS  |
| hsa-miR-4785     | XM_017004619 | NLRC4 | 3.99E-05    | CDS  |
| hsa-miR-4785     | XM_017004619 | NLRC4 | 5.97E-06    | CDS  |
| hsa-miR-1245b-3p | XM_017004619 | NLRC4 | 0.01416172  | 3UTR |
| hsa-miR-2467-5p  | XM_017004619 | NLRC4 | 0.01416172  | 3UTR |
| hsa-miR-2467-5p  | XM_017004619 | NLRC4 | 6.17E-06    | CDS  |
| hsa-miR-2467-5p  | XM_017004619 | NLRC4 | 3.11E-06    | CDS  |
| hsa-miR-2467-3p  | XM_017004619 | NLRC4 | 0.000217711 | CDS  |
| hsa-miR-4786-5p  | XM_017004619 | NLRC4 | 0.01000834  | CDS  |
| hsa-miR-4786-5p  | XM_017004619 | NLRC4 | 0.005280519 | 5UTR |
| hsa-miR-4786-3p  | XM_017004619 | NLRC4 | 2.40E-05    | CDS  |
| hsa-miR-4786-3p  | XM_017004619 | NLRC4 | 5.34E-05    | CDS  |
| hsa-miR-4787-5p  | XM_017004619 | NLRC4 | 1.77E-06    | CDS  |
| hsa-miR-4787-5p  | XM_017004619 | NLRC4 | 0.00091255  | CDS  |
| hsa-miR-4787-5p  | XM_017004619 | NLRC4 | 0.000293001 | CDS  |
| hsa-miR-4788     | XM_017004619 | NLRC4 | 0.003190413 | CDS  |
| hsa-miR-4788     | XM_017004619 | NLRC4 | 0.000897224 | CDS  |
| hsa-miR-4793-5p  | XM_017004619 | NLRC4 | 3.57E-05    | CDS  |
| hsa-miR-4793-5p  | XM_017004619 | NLRC4 | 6.20E-07    | CDS  |
| hsa-miR-4793-3p  | XM_017004619 | NLRC4 | 3.51E-05    | CDS  |
| hsa-miR-4793-3p  | XM_017004619 | NLRC4 | 0.001102841 | CDS  |
| hsa-miR-4796-3p  | XM_017004619 | NLRC4 | 0.02398038  | CDS  |
| hsa-miR-4797-3p  | XM_017004619 | NLRC4 | 0.000265177 | CDS  |
| hsa-miR-4799-5p  | XM_017004619 | NLRC4 | 9.02E-06    | CDS  |
| hsa-miR-4799-3p  | XM_017004619 | NLRC4 | 0.000169986 | CDS  |
| hsa-miR-4800-5p  | XM_017004619 | NLRC4 | 0.01730902  | CDS  |
| hsa-miR-4802-5p  | XM_017004619 | NLRC4 | 5.97E-06    | CDS  |
| hsa-miR-5000-3p  | XM_017004619 | NLRC4 | 0.01519719  | CDS  |
| hsa-miR-5000-3p  | XM_017004619 | NLRC4 | 2.73E-06    | CDS  |
| hsa-miR-5001-5p  | XM_017004619 | NLRC4 | 0.000608953 | CDS  |
| hsa-miR-5001-5p  | XM_017004619 | NLRC4 | 0.00151455  | CDS  |
| hsa-miR-5001-5p  | XM_017004619 | NLRC4 | 0.000135859 | CDS  |
| hsa-miR-5001-5p  | XM_017004619 | NLRC4 | 0.02447189  | CDS  |
| hsa-miR-5001-3p  | XM_017004619 | NLRC4 | 3.43E-05    | 3UTR |
| hsa-miR-5001-3p  | XM_017004619 | NLRC4 | 6.31E-05    | 3UTR |
| hsa-miR-5002-5p  | XM_017004619 | NLRC4 | 2.73E-06    | CDS  |

|                 |              |       |             |      |
|-----------------|--------------|-------|-------------|------|
| hsa-miR-5002-5p | XM_017004619 | NLRC4 | 0.01201202  | CDS  |
| hsa-miR-5002-5p | XM_017004619 | NLRC4 | 0.04679531  | 5UTR |
| hsa-miR-5002-5p | XM_017004619 | NLRC4 | 0.005266164 | CDS  |
| hsa-miR-5002-3p | XM_017004619 | NLRC4 | 6.12E-05    | 3UTR |
| hsa-miR-5003-3p | XM_017004619 | NLRC4 | 0.07786144  | 5UTR |
| hsa-miR-5004-5p | XM_017004619 | NLRC4 | 0.000478711 | CDS  |
| hsa-miR-5004-3p | XM_017004619 | NLRC4 | 0.000158814 | CDS  |
| hsa-miR-5006-5p | XM_017004619 | NLRC4 | 0.002472386 | CDS  |
| hsa-miR-5006-3p | XM_017004619 | NLRC4 | 0.000719145 | CDS  |
| hsa-miR-5006-3p | XM_017004619 | NLRC4 | 0.000199878 | CDS  |
| hsa-miR-5008-5p | XM_017004619 | NLRC4 | 7.19E-05    | CDS  |
| hsa-miR-5008-3p | XM_017004619 | NLRC4 | 0.000381964 | CDS  |
| hsa-miR-5008-3p | XM_017004619 | NLRC4 | 4.98E-06    | CDS  |
| hsa-miR-5009-5p | XM_017004619 | NLRC4 | 0.003596187 | CDS  |
| hsa-miR-5010-5p | XM_017004619 | NLRC4 | 0.000598122 | CDS  |
| hsa-miR-5010-3p | XM_017004619 | NLRC4 | 0.00033047  | CDS  |
| hsa-miR-5047    | XM_017004619 | NLRC4 | 1.12E-06    | CDS  |
| hsa-miR-5047    | XM_017004619 | NLRC4 | 0.000170577 | CDS  |
| hsa-miR-5087    | XM_017004619 | NLRC4 | 5.85E-06    | CDS  |
| hsa-miR-5087    | XM_017004619 | NLRC4 | 0.001750774 | CDS  |
| hsa-miR-5088-5p | XM_017004619 | NLRC4 | 0.0645003   | CDS  |
| hsa-miR-5088-5p | XM_017004619 | NLRC4 | 0.000671559 | CDS  |
| hsa-miR-5088-3p | XM_017004619 | NLRC4 | 6.44E-07    | CDS  |
| hsa-miR-5089-5p | XM_017004619 | NLRC4 | 0.01718499  | CDS  |
| hsa-miR-5089-5p | XM_017004619 | NLRC4 | 0.000743386 | CDS  |
| hsa-miR-5090    | XM_017004619 | NLRC4 | 0.00210636  | CDS  |
| hsa-miR-5090    | XM_017004619 | NLRC4 | 0.000326334 | CDS  |
| hsa-miR-5091    | XM_017004619 | NLRC4 | 0.002762722 | 5UTR |
| hsa-miR-5091    | XM_017004619 | NLRC4 | 0.000161338 | CDS  |
| hsa-miR-5092    | XM_017004619 | NLRC4 | 7.76E-05    | CDS  |
| hsa-miR-5094    | XM_017004619 | NLRC4 | 0.01856042  | 5UTR |
| hsa-miR-5187-5p | XM_017004619 | NLRC4 | 0.01330528  | CDS  |
| hsa-miR-5187-5p | XM_017004619 | NLRC4 | 0.00086116  | CDS  |
| hsa-miR-5188    | XM_017004619 | NLRC4 | 0.000226722 | CDS  |
| hsa-miR-5188    | XM_017004619 | NLRC4 | 0.001937031 | CDS  |
| hsa-miR-5189-5p | XM_017004619 | NLRC4 | 8.80E-06    | CDS  |
| hsa-miR-5190    | XM_017004619 | NLRC4 | 3.50E-05    | CDS  |
| hsa-miR-5191    | XM_017004619 | NLRC4 | 0.000642323 | CDS  |
| hsa-miR-5192    | XM_017004619 | NLRC4 | 0.001815418 | CDS  |
| hsa-miR-5193    | XM_017004619 | NLRC4 | 0.000244245 | CDS  |
| hsa-miR-5193    | XM_017004619 | NLRC4 | 0.000106281 | CDS  |
| hsa-miR-5193    | XM_017004619 | NLRC4 | 1.83E-05    | 3UTR |
| hsa-miR-5194    | XM_017004619 | NLRC4 | 3.48E-05    | CDS  |
| hsa-miR-5194    | XM_017004619 | NLRC4 | 2.28E-05    | CDS  |

|                  |              |       |             |      |
|------------------|--------------|-------|-------------|------|
| hsa-miR-5195-3p  | XM_017004619 | NLRC4 | 0.000423087 | CDS  |
| hsa-miR-5195-3p  | XM_017004619 | NLRC4 | 0.01839056  | 5UTR |
| hsa-miR-5195-3p  | XM_017004619 | NLRC4 | 5.71E-06    | CDS  |
| hsa-miR-5196-5p  | XM_017004619 | NLRC4 | 0.07138354  | CDS  |
| hsa-miR-5196-5p  | XM_017004619 | NLRC4 | 0.009044755 | CDS  |
| hsa-miR-5196-3p  | XM_017004619 | NLRC4 | 0.000406012 | 3UTR |
| hsa-miR-5571-5p  | XM_017004619 | NLRC4 | 0.000447908 | CDS  |
| hsa-miR-5571-5p  | XM_017004619 | NLRC4 | 0.000901486 | CDS  |
| hsa-miR-5571-3p  | XM_017004619 | NLRC4 | 5.23E-05    | CDS  |
| hsa-miR-5571-3p  | XM_017004619 | NLRC4 | 0.000245493 | CDS  |
| hsa-miR-5100     | XM_017004619 | NLRC4 | 0.00199289  | CDS  |
| hsa-miR-5100     | XM_017004619 | NLRC4 | 6.65E-06    | CDS  |
| hsa-miR-5100     | XM_017004619 | NLRC4 | 0.01235071  | 5UTR |
| hsa-miR-5572     | XM_017004619 | NLRC4 | 1.28E-06    | CDS  |
| hsa-miR-5579-5p  | XM_017004619 | NLRC4 | 0.000842272 | CDS  |
| hsa-miR-5579-3p  | XM_017004619 | NLRC4 | 2.75E-07    | CDS  |
| hsa-miR-664b-5p  | XM_017004619 | NLRC4 | 0.0645003   | CDS  |
| hsa-miR-664b-5p  | XM_017004619 | NLRC4 | 0.005609759 | CDS  |
| hsa-miR-664b-3p  | XM_017004619 | NLRC4 | 0.000369226 | 3UTR |
| hsa-miR-5581-5p  | XM_017004619 | NLRC4 | 1.57E-05    | 3UTR |
| hsa-miR-5581-3p  | XM_017004619 | NLRC4 | 0.000245493 | CDS  |
| hsa-miR-5581-3p  | XM_017004619 | NLRC4 | 0.000369226 | 3UTR |
| hsa-miR-5584-3p  | XM_017004619 | NLRC4 | 0.008224432 | CDS  |
| hsa-miR-5585-3p  | XM_017004619 | NLRC4 | 1.12E-06    | 3UTR |
| hsa-miR-5586-3p  | XM_017004619 | NLRC4 | 9.68E-05    | CDS  |
| hsa-miR-5587-5p  | XM_017004619 | NLRC4 | 0.001064408 | CDS  |
| hsa-miR-5587-3p  | XM_017004619 | NLRC4 | 0.001218159 | CDS  |
| hsa-miR-5587-3p  | XM_017004619 | NLRC4 | 6.57E-06    | CDS  |
| hsa-miR-5587-3p  | XM_017004619 | NLRC4 | 5.89E-05    | 3UTR |
| hsa-miR-548au-3p | XM_017004619 | NLRC4 | 7.72E-06    | CDS  |
| hsa-miR-1295b-5p | XM_017004619 | NLRC4 | 0.00329055  | CDS  |
| hsa-miR-1295b-3p | XM_017004619 | NLRC4 | 0.000281957 | CDS  |
| hsa-miR-1295b-3p | XM_017004619 | NLRC4 | 0.01837384  | CDS  |
| hsa-miR-5589-5p  | XM_017004619 | NLRC4 | 2.92E-05    | CDS  |
| hsa-miR-5589-3p  | XM_017004619 | NLRC4 | 0.006223583 | CDS  |
| hsa-miR-5589-3p  | XM_017004619 | NLRC4 | 6.41E-06    | CDS  |
| hsa-miR-5591-5p  | XM_017004619 | NLRC4 | 0.00237631  | CDS  |
| hsa-miR-5591-3p  | XM_017004619 | NLRC4 | 0.00014298  | CDS  |
| hsa-miR-5683     | XM_017004619 | NLRC4 | 0.05000297  | CDS  |
| hsa-miR-548ax    | XM_017004619 | NLRC4 | 0.005707855 | CDS  |
| hsa-miR-5685     | XM_017004619 | NLRC4 | 1.46E-05    | CDS  |
| hsa-miR-5689     | XM_017004619 | NLRC4 | 6.37E-06    | CDS  |
| hsa-miR-5691     | XM_017004619 | NLRC4 | 0.00111785  | CDS  |
| hsa-miR-5696     | XM_017004619 | NLRC4 | 0.03362553  | CDS  |

|                 |              |       |             |      |
|-----------------|--------------|-------|-------------|------|
| hsa-miR-5698    | XM_017004619 | NLRC4 | 0.001014646 | CDS  |
| hsa-miR-5699-3p | XM_017004619 | NLRC4 | 0.000244245 | CDS  |
| hsa-miR-5699-3p | XM_017004619 | NLRC4 | 0.000542111 | CDS  |
| hsa-miR-5702    | XM_017004619 | NLRC4 | 4.83E-05    | CDS  |
| hsa-miR-5703    | XM_017004619 | NLRC4 | 0.0264118   | CDS  |
| hsa-miR-5704    | XM_017004619 | NLRC4 | 1.61E-05    | CDS  |
| hsa-miR-5705    | XM_017004619 | NLRC4 | 0.02402248  | CDS  |
| hsa-miR-5705    | XM_017004619 | NLRC4 | 4.42E-05    | CDS  |
| hsa-miR-5706    | XM_017004619 | NLRC4 | 0.000228869 | CDS  |
| hsa-miR-5708    | XM_017004619 | NLRC4 | 1.59E-05    | 3UTR |
| hsa-miR-5739    | XM_017004619 | NLRC4 | 0.000855203 | CDS  |
| hsa-miR-5787    | XM_017004619 | NLRC4 | 0.000671559 | CDS  |
| hsa-miR-5787    | XM_017004619 | NLRC4 | 0.1188673   | CDS  |
| hsa-miR-5787    | XM_017004619 | NLRC4 | 9.76E-05    | CDS  |
| hsa-miR-1199-5p | XM_017004619 | NLRC4 | 4.98E-06    | CDS  |
| hsa-miR-1199-5p | XM_017004619 | NLRC4 | 8.56E-06    | CDS  |
| hsa-miR-1199-3p | XM_017004619 | NLRC4 | 6.41E-06    | CDS  |
| hsa-miR-1199-3p | XM_017004619 | NLRC4 | 0.006223583 | CDS  |
| hsa-miR-6068    | XM_017004619 | NLRC4 | 5.25E-05    | CDS  |
| hsa-miR-6068    | XM_017004619 | NLRC4 | 2.96E-05    | CDS  |
| hsa-miR-6069    | XM_017004619 | NLRC4 | 3.41E-07    | CDS  |
| hsa-miR-6070    | XM_017004619 | NLRC4 | 0.005266164 | CDS  |
| hsa-miR-6071    | XM_017004619 | NLRC4 | 0.01228754  | CDS  |
| hsa-miR-6071    | XM_017004619 | NLRC4 | 2.94E-05    | CDS  |
| hsa-miR-6074    | XM_017004619 | NLRC4 | 1.92E-05    | CDS  |
| hsa-miR-6075    | XM_017004619 | NLRC4 | 8.36E-06    | CDS  |
| hsa-miR-6075    | XM_017004619 | NLRC4 | 0.000972019 | CDS  |
| hsa-miR-6077    | XM_017004619 | NLRC4 | 0.003385126 | CDS  |
| hsa-miR-6078    | XM_017004619 | NLRC4 | 1.46E-05    | CDS  |
| hsa-miR-6078    | XM_017004619 | NLRC4 | 0.000121469 | CDS  |
| hsa-miR-6080    | XM_017004619 | NLRC4 | 0.00727267  | CDS  |
| hsa-miR-6081    | XM_017004619 | NLRC4 | 0.000161338 | CDS  |
| hsa-miR-6083    | XM_017004619 | NLRC4 | 0.04526314  | CDS  |
| hsa-miR-6084    | XM_017004619 | NLRC4 | 8.36E-06    | CDS  |
| hsa-miR-6084    | XM_017004619 | NLRC4 | 3.43E-05    | 3UTR |
| hsa-miR-6086    | XM_017004619 | NLRC4 | 0.001135043 | CDS  |
| hsa-miR-6086    | XM_017004619 | NLRC4 | 0.08822971  | CDS  |
| hsa-miR-6086    | XM_017004619 | NLRC4 | 0.004035133 | CDS  |
| hsa-miR-6088    | XM_017004619 | NLRC4 | 0.03183273  | CDS  |
| hsa-miR-6088    | XM_017004619 | NLRC4 | 0.001645489 | CDS  |
| hsa-miR-6089    | XM_017004619 | NLRC4 | 0.01176218  | CDS  |
| hsa-miR-6090    | XM_017004619 | NLRC4 | 0.001239845 | CDS  |
| hsa-miR-6124    | XM_017004619 | NLRC4 | 0.000671559 | CDS  |
| hsa-miR-6125    | XM_017004619 | NLRC4 | 0.08871414  | CDS  |

|                  |              |       |             |      |
|------------------|--------------|-------|-------------|------|
| hsa-miR-6125     | XM_017004619 | NLRC4 | 0.0264118   | CDS  |
| hsa-miR-6125     | XM_017004619 | NLRC4 | 2.01E-05    | CDS  |
| hsa-miR-6126     | XM_017004619 | NLRC4 | 0.001025993 | CDS  |
| hsa-miR-6126     | XM_017004619 | NLRC4 | 5.54E-06    | CDS  |
| hsa-miR-6127     | XM_017004619 | NLRC4 | 0.004639071 | CDS  |
| hsa-miR-6127     | XM_017004619 | NLRC4 | 0.04749199  | CDS  |
| hsa-miR-378j     | XM_017004619 | NLRC4 | 0.00721524  | CDS  |
| hsa-miR-378j     | XM_017004619 | NLRC4 | 0.003596187 | CDS  |
| hsa-miR-6129     | XM_017004619 | NLRC4 | 2.09E-06    | CDS  |
| hsa-miR-6129     | XM_017004619 | NLRC4 | 0.06687653  | CDS  |
| hsa-miR-6132     | XM_017004619 | NLRC4 | 0.00107409  | CDS  |
| hsa-miR-6133     | XM_017004619 | NLRC4 | 2.55E-05    | CDS  |
| hsa-miR-6133     | XM_017004619 | NLRC4 | 0.0268879   | CDS  |
| hsa-miR-6165     | XM_017004619 | NLRC4 | 1.85E-05    | CDS  |
| hsa-miR-6165     | XM_017004619 | NLRC4 | 0.02245598  | CDS  |
| hsa-miR-6165     | XM_017004619 | NLRC4 | 1.00E-06    | CDS  |
| hsa-miR-6499-5p  | XM_017004619 | NLRC4 | 4.98E-06    | CDS  |
| hsa-miR-6499-5p  | XM_017004619 | NLRC4 | 3.41E-07    | CDS  |
| hsa-miR-6499-3p  | XM_017004619 | NLRC4 | 7.45E-06    | CDS  |
| hsa-miR-6500-5p  | XM_017004619 | NLRC4 | 3.68E-05    | CDS  |
| hsa-miR-6500-5p  | XM_017004619 | NLRC4 | 0.005855153 | CDS  |
| hsa-miR-6500-3p  | XM_017004619 | NLRC4 | 0.000102364 | 5UTR |
| hsa-miR-6500-3p  | XM_017004619 | NLRC4 | 0.000821102 | CDS  |
| hsa-miR-6500-3p  | XM_017004619 | NLRC4 | 0.007495679 | CDS  |
| hsa-miR-6501-5p  | XM_017004619 | NLRC4 | 1.44E-06    | CDS  |
| hsa-miR-6501-3p  | XM_017004619 | NLRC4 | 7.18E-05    | CDS  |
| hsa-miR-6501-3p  | XM_017004619 | NLRC4 | 0.002208114 | CDS  |
| hsa-miR-6502-3p  | XM_017004619 | NLRC4 | 0.000469601 | 3UTR |
| hsa-miR-6503-3p  | XM_017004619 | NLRC4 | 6.44E-05    | CDS  |
| hsa-miR-6503-3p  | XM_017004619 | NLRC4 | 0.000571804 | CDS  |
| hsa-miR-6504-5p  | XM_017004619 | NLRC4 | 2.19E-05    | 5UTR |
| hsa-miR-6505-5p  | XM_017004619 | NLRC4 | 0.001481713 | CDS  |
| hsa-miR-6505-5p  | XM_017004619 | NLRC4 | 0.001028636 | CDS  |
| hsa-miR-6507-5p  | XM_017004619 | NLRC4 | 0.02185333  | CDS  |
| hsa-miR-6509-5p  | XM_017004619 | NLRC4 | 0.000578387 | CDS  |
| hsa-miR-6509-3p  | XM_017004619 | NLRC4 | 1.12E-05    | CDS  |
| hsa-miR-6510-5p  | XM_017004619 | NLRC4 | 1.00E-06    | CDS  |
| hsa-miR-6510-5p  | XM_017004619 | NLRC4 | 0.002263662 | CDS  |
| hsa-miR-6510-3p  | XM_017004619 | NLRC4 | 0.00329055  | CDS  |
| hsa-miR-6511a-5p | XM_017004619 | NLRC4 | 0.1067239   | CDS  |
| hsa-miR-6511a-5p | XM_017004619 | NLRC4 | 0.002224226 | CDS  |
| hsa-miR-6511a-3p | XM_017004619 | NLRC4 | 0.000119651 | CDS  |
| hsa-miR-6513-3p  | XM_017004619 | NLRC4 | 0.01416172  | 3UTR |
| hsa-miR-6514-5p  | XM_017004619 | NLRC4 | 4.95E-07    | CDS  |

|                  |              |       |             |      |
|------------------|--------------|-------|-------------|------|
| hsa-miR-6514-5p  | XM_017004619 | NLRC4 | 0.00034557  | CDS  |
| hsa-miR-6515-5p  | XM_017004619 | NLRC4 | 0.08288526  | CDS  |
| hsa-miR-6515-5p  | XM_017004619 | NLRC4 | 0.05383761  | CDS  |
| hsa-miR-6515-5p  | XM_017004619 | NLRC4 | 0.02468582  | CDS  |
| hsa-miR-6715b-5p | XM_017004619 | NLRC4 | 0.001170791 | CDS  |
| hsa-miR-6715b-5p | XM_017004619 | NLRC4 | 4.15E-05    | CDS  |
| hsa-miR-6716-5p  | XM_017004619 | NLRC4 | 0.08882998  | CDS  |
| hsa-miR-6716-5p  | XM_017004619 | NLRC4 | 0.00086116  | CDS  |
| hsa-miR-6716-3p  | XM_017004619 | NLRC4 | 0.000645151 | CDS  |
| hsa-miR-6717-5p  | XM_017004619 | NLRC4 | 6.20E-05    | CDS  |
| hsa-miR-6511b-5p | XM_017004619 | NLRC4 | 0.1399983   | CDS  |
| hsa-miR-6511b-5p | XM_017004619 | NLRC4 | 0.000211789 | CDS  |
| hsa-miR-6511b-5p | XM_017004619 | NLRC4 | 7.71E-05    | CDS  |
| hsa-miR-6511b-5p | XM_017004619 | NLRC4 | 0.01064963  | CDS  |
| hsa-miR-6718-5p  | XM_017004619 | NLRC4 | 0.001064408 | CDS  |
| hsa-miR-6720-5p  | XM_017004619 | NLRC4 | 1.47E-05    | CDS  |
| hsa-miR-6720-3p  | XM_017004619 | NLRC4 | 0.000133333 | CDS  |
| hsa-miR-6720-3p  | XM_017004619 | NLRC4 | 2.55E-05    | CDS  |
| hsa-miR-6720-3p  | XM_017004619 | NLRC4 | 2.79E-05    | CDS  |
| hsa-miR-6721-5p  | XM_017004619 | NLRC4 | 1.12E-05    | CDS  |
| hsa-miR-6721-5p  | XM_017004619 | NLRC4 | 0.1222725   | CDS  |
| hsa-miR-6722-5p  | XM_017004619 | NLRC4 | 6.37E-06    | CDS  |
| hsa-miR-6722-3p  | XM_017004619 | NLRC4 | 1.19E-06    | CDS  |
| hsa-miR-6724-5p  | XM_017004619 | NLRC4 | 4.98E-06    | CDS  |
| hsa-miR-6726-5p  | XM_017004619 | NLRC4 | 3.17E-07    | CDS  |
| hsa-miR-6726-5p  | XM_017004619 | NLRC4 | 0.001633284 | CDS  |
| hsa-miR-6726-5p  | XM_017004619 | NLRC4 | 1.16E-05    | CDS  |
| hsa-miR-6726-3p  | XM_017004619 | NLRC4 | 4.84E-07    | CDS  |
| hsa-miR-6726-3p  | XM_017004619 | NLRC4 | 6.12E-05    | 3UTR |
| hsa-miR-6726-3p  | XM_017004619 | NLRC4 | 0.001031207 | CDS  |
| hsa-miR-6727-5p  | XM_017004619 | NLRC4 | 0.00210636  | CDS  |
| hsa-miR-6727-5p  | XM_017004619 | NLRC4 | 0.007047336 | CDS  |
| hsa-miR-6727-5p  | XM_017004619 | NLRC4 | 3.78E-05    | CDS  |
| hsa-miR-6727-3p  | XM_017004619 | NLRC4 | 0.000244245 | CDS  |
| hsa-miR-6727-3p  | XM_017004619 | NLRC4 | 0.001397618 | CDS  |
| hsa-miR-6728-5p  | XM_017004619 | NLRC4 | 0.000834806 | CDS  |
| hsa-miR-6728-5p  | XM_017004619 | NLRC4 | 0.08241963  | CDS  |
| hsa-miR-6728-5p  | XM_017004619 | NLRC4 | 0.02675239  | CDS  |
| hsa-miR-6728-3p  | XM_017004619 | NLRC4 | 1.82E-05    | CDS  |
| hsa-miR-6728-3p  | XM_017004619 | NLRC4 | 6.31E-05    | 3UTR |
| hsa-miR-6728-3p  | XM_017004619 | NLRC4 | 7.91E-05    | CDS  |
| hsa-miR-6729-5p  | XM_017004619 | NLRC4 | 0.003824517 | CDS  |
| hsa-miR-6729-5p  | XM_017004619 | NLRC4 | 0.000755782 | CDS  |
| hsa-miR-6729-3p  | XM_017004619 | NLRC4 | 0.000337721 | 3UTR |



|                 |              |       |             |      |
|-----------------|--------------|-------|-------------|------|
| hsa-miR-6730-5p | XM_017004619 | NLRC4 | 0.000187316 | CDS  |
| hsa-miR-6730-5p | XM_017004619 | NLRC4 | 0.001014646 | CDS  |
| hsa-miR-6730-3p | XM_017004619 | NLRC4 | 0.000337721 | 3UTR |
| hsa-miR-6731-5p | XM_017004619 | NLRC4 | 0.000135949 | CDS  |
| hsa-miR-6731-5p | XM_017004619 | NLRC4 | 0.000276588 | 5UTR |
| hsa-miR-6731-3p | XM_017004619 | NLRC4 | 0.008234576 | CDS  |
| hsa-miR-6731-3p | XM_017004619 | NLRC4 | 0.000259323 | CDS  |
| hsa-miR-6732-5p | XM_017004619 | NLRC4 | 0.000598122 | CDS  |
| hsa-miR-6732-3p | XM_017004619 | NLRC4 | 0.000337721 | 3UTR |
| hsa-miR-6732-3p | XM_017004619 | NLRC4 | 0.009187106 | CDS  |
| hsa-miR-6733-3p | XM_017004619 | NLRC4 | 0.01519719  | CDS  |
| hsa-miR-6734-5p | XM_017004619 | NLRC4 | 0.002665851 | CDS  |
| hsa-miR-6734-3p | XM_017004619 | NLRC4 | 0.000259323 | CDS  |
| hsa-miR-6735-5p | XM_017004619 | NLRC4 | 0.02185333  | CDS  |
| hsa-miR-6735-5p | XM_017004619 | NLRC4 | 0.01473863  | CDS  |
| hsa-miR-6735-3p | XM_017004619 | NLRC4 | 1.46E-05    | CDS  |
| hsa-miR-6735-3p | XM_017004619 | NLRC4 | 1.61E-05    | CDS  |
| hsa-miR-6736-5p | XM_017004619 | NLRC4 | 0.000855203 | CDS  |
| hsa-miR-6736-5p | XM_017004619 | NLRC4 | 0.001886311 | 5UTR |
| hsa-miR-6736-3p | XM_017004619 | NLRC4 | 8.09E-06    | CDS  |
| hsa-miR-6737-5p | XM_017004619 | NLRC4 | 0.000384216 | CDS  |
| hsa-miR-6737-5p | XM_017004619 | NLRC4 | 3.48E-05    | CDS  |
| hsa-miR-6737-3p | XM_017004619 | NLRC4 | 0.01223285  | CDS  |
| hsa-miR-6738-5p | XM_017004619 | NLRC4 | 9.62E-07    | CDS  |
| hsa-miR-6738-3p | XM_017004619 | NLRC4 | 0.000215389 | CDS  |
| hsa-miR-6738-3p | XM_017004619 | NLRC4 | 0.000108746 | 3UTR |
| hsa-miR-6740-5p | XM_017004619 | NLRC4 | 0.01730902  | CDS  |
| hsa-miR-6740-5p | XM_017004619 | NLRC4 | 0.000267696 | CDS  |
| hsa-miR-6740-5p | XM_017004619 | NLRC4 | 0.000506083 | CDS  |
| hsa-miR-6740-3p | XM_017004619 | NLRC4 | 0.1045722   | CDS  |
| hsa-miR-6740-3p | XM_017004619 | NLRC4 | 8.36E-05    | 3UTR |
| hsa-miR-6740-3p | XM_017004619 | NLRC4 | 0.0109425   | CDS  |
| hsa-miR-6741-5p | XM_017004619 | NLRC4 | 0.000293001 | CDS  |
| hsa-miR-6741-5p | XM_017004619 | NLRC4 | 0.04971988  | CDS  |
| hsa-miR-6741-5p | XM_017004619 | NLRC4 | 0.00933987  | CDS  |
| hsa-miR-6741-3p | XM_017004619 | NLRC4 | 5.88E-05    | 3UTR |
| hsa-miR-6742-5p | XM_017004619 | NLRC4 | 0.04053145  | CDS  |
| hsa-miR-6742-5p | XM_017004619 | NLRC4 | 0.06972308  | CDS  |
| hsa-miR-6742-3p | XM_017004619 | NLRC4 | 0.000107277 | CDS  |
| hsa-miR-6742-3p | XM_017004619 | NLRC4 | 0.001218159 | CDS  |
| hsa-miR-6743-5p | XM_017004619 | NLRC4 | 0.000379735 | CDS  |
| hsa-miR-6743-5p | XM_017004619 | NLRC4 | 0.01542657  | CDS  |
| hsa-miR-6743-3p | XM_017004619 | NLRC4 | 1.60E-06    | CDS  |
| hsa-miR-6744-3p | XM_017004619 | NLRC4 | 0.001269939 | CDS  |

|                 |              |       |             |      |
|-----------------|--------------|-------|-------------|------|
| hsa-miR-6744-3p | XM_017004619 | NLRC4 | 0.001262872 | CDS  |
| hsa-miR-6744-3p | XM_017004619 | NLRC4 | 0.000125663 | CDS  |
| hsa-miR-6745    | XM_017004619 | NLRC4 | 0.003824517 | CDS  |
| hsa-miR-6746-5p | XM_017004619 | NLRC4 | 4.74E-06    | CDS  |
| hsa-miR-6746-5p | XM_017004619 | NLRC4 | 0.01479238  | CDS  |
| hsa-miR-6746-5p | XM_017004619 | NLRC4 | 0.02837663  | CDS  |
| hsa-miR-6746-3p | XM_017004619 | NLRC4 | 1.88E-05    | CDS  |
| hsa-miR-6746-3p | XM_017004619 | NLRC4 | 7.45E-06    | CDS  |
| hsa-miR-6746-3p | XM_017004619 | NLRC4 | 0.000972019 | CDS  |
| hsa-miR-6747-5p | XM_017004619 | NLRC4 | 0.03151826  | CDS  |
| hsa-miR-6747-3p | XM_017004619 | NLRC4 | 5.56E-06    | CDS  |
| hsa-miR-6748-5p | XM_017004619 | NLRC4 | 0.009044755 | CDS  |
| hsa-miR-6748-5p | XM_017004619 | NLRC4 | 0.03296809  | CDS  |
| hsa-miR-6748-3p | XM_017004619 | NLRC4 | 0.009187106 | CDS  |
| hsa-miR-6748-3p | XM_017004619 | NLRC4 | 0.06177347  | CDS  |
| hsa-miR-6749-5p | XM_017004619 | NLRC4 | 0.000113783 | CDS  |
| hsa-miR-6749-5p | XM_017004619 | NLRC4 | 6.44E-07    | CDS  |
| hsa-miR-6749-3p | XM_017004619 | NLRC4 | 0.000106281 | CDS  |
| hsa-miR-6750-3p | XM_017004619 | NLRC4 | 6.90E-06    | CDS  |
| hsa-miR-6751-5p | XM_017004619 | NLRC4 | 0.08241963  | CDS  |
| hsa-miR-6751-5p | XM_017004619 | NLRC4 | 0.002208302 | CDS  |
| hsa-miR-6752-5p | XM_017004619 | NLRC4 | 8.25E-06    | CDS  |
| hsa-miR-6752-5p | XM_017004619 | NLRC4 | 0.000293001 | CDS  |
| hsa-miR-6752-3p | XM_017004619 | NLRC4 | 0.000245493 | CDS  |
| hsa-miR-6753-5p | XM_017004619 | NLRC4 | 7.18E-05    | CDS  |
| hsa-miR-6753-5p | XM_017004619 | NLRC4 | 0.000326334 | CDS  |
| hsa-miR-6753-3p | XM_017004619 | NLRC4 | 1.59E-05    | 3UTR |
| hsa-miR-6753-3p | XM_017004619 | NLRC4 | 0.000411356 | 3UTR |
| hsa-miR-6753-3p | XM_017004619 | NLRC4 | 0.000381964 | CDS  |
| hsa-miR-6754-5p | XM_017004619 | NLRC4 | 4.74E-06    | CDS  |
| hsa-miR-6754-5p | XM_017004619 | NLRC4 | 4.87E-05    | 3UTR |
| hsa-miR-6754-3p | XM_017004619 | NLRC4 | 0.000369226 | 3UTR |
| hsa-miR-6756-5p | XM_017004619 | NLRC4 | 3.41E-07    | CDS  |
| hsa-miR-6756-5p | XM_017004619 | NLRC4 | 0.008461483 | CDS  |
| hsa-miR-6757-5p | XM_017004619 | NLRC4 | 0.000276588 | 5UTR |
| hsa-miR-6757-5p | XM_017004619 | NLRC4 | 0.03151826  | CDS  |
| hsa-miR-6757-5p | XM_017004619 | NLRC4 | 8.25E-06    | CDS  |
| hsa-miR-6757-3p | XM_017004619 | NLRC4 | 0.004374828 | CDS  |
| hsa-miR-6757-3p | XM_017004619 | NLRC4 | 0.00329055  | CDS  |
| hsa-miR-6758-5p | XM_017004619 | NLRC4 | 0.000214933 | CDS  |
| hsa-miR-6759-5p | XM_017004619 | NLRC4 | 0.0220862   | 5UTR |
| hsa-miR-6759-3p | XM_017004619 | NLRC4 | 0.000411356 | 3UTR |
| hsa-miR-6759-3p | XM_017004619 | NLRC4 | 0.004730357 | CDS  |
| hsa-miR-6760-5p | XM_017004619 | NLRC4 | 4.03E-06    | CDS  |

|                  |              |       |             |      |
|------------------|--------------|-------|-------------|------|
| hsa-miR-6760-3p  | XM_017004619 | NLRC4 | 3.07E-05    | CDS  |
| hsa-miR-6760-3p  | XM_017004619 | NLRC4 | 0.004370877 | CDS  |
| hsa-miR-6761-5p  | XM_017004619 | NLRC4 | 5.71E-06    | CDS  |
| hsa-miR-6762-5p  | XM_017004619 | NLRC4 | 3.17E-07    | CDS  |
| hsa-miR-6762-5p  | XM_017004619 | NLRC4 | 0.001516459 | CDS  |
| hsa-miR-6762-3p  | XM_017004619 | NLRC4 | 4.78E-06    | CDS  |
| hsa-miR-6762-3p  | XM_017004619 | NLRC4 | 0.000963264 | CDS  |
| hsa-miR-6762-3p  | XM_017004619 | NLRC4 | 0.006628845 | CDS  |
| hsa-miR-6762-3p  | XM_017004619 | NLRC4 | 1.32E-05    | CDS  |
| hsa-miR-6763-5p  | XM_017004619 | NLRC4 | 0.1399983   | CDS  |
| hsa-miR-6763-5p  | XM_017004619 | NLRC4 | 0.08241963  | CDS  |
| hsa-miR-6763-5p  | XM_017004619 | NLRC4 | 0.000511852 | CDS  |
| hsa-miR-6763-5p  | XM_017004619 | NLRC4 | 0.001372911 | CDS  |
| hsa-miR-6763-3p  | XM_017004619 | NLRC4 | 6.12E-05    | 3UTR |
| hsa-miR-6763-3p  | XM_017004619 | NLRC4 | 0.000106281 | CDS  |
| hsa-miR-6764-5p  | XM_017004619 | NLRC4 | 1.23E-05    | CDS  |
| hsa-miR-6764-5p  | XM_017004619 | NLRC4 | 2.86E-05    | 3UTR |
| hsa-miR-6764-3p  | XM_017004619 | NLRC4 | 4.79E-06    | CDS  |
| hsa-miR-6765-5p  | XM_017004619 | NLRC4 | 2.13E-05    | CDS  |
| hsa-miR-6765-5p  | XM_017004619 | NLRC4 | 0.01527382  | 5UTR |
| hsa-miR-6765-3p  | XM_017004619 | NLRC4 | 1.46E-05    | CDS  |
| hsa-miR-6766-5p  | XM_017004619 | NLRC4 | 0.001023348 | CDS  |
| hsa-miR-6766-5p  | XM_017004619 | NLRC4 | 0.000345859 | CDS  |
| hsa-miR-6766-5p  | XM_017004619 | NLRC4 | 6.21E-05    | CDS  |
| hsa-miR-6766-3p  | XM_017004619 | NLRC4 | 0.009171114 | CDS  |
| hsa-miR-6767-5p  | XM_017004619 | NLRC4 | 1.24E-05    | CDS  |
| hsa-miR-6767-3p  | XM_017004619 | NLRC4 | 0.001972862 | CDS  |
| hsa-miR-6768-5p  | XM_017004619 | NLRC4 | 5.90E-05    | CDS  |
| hsa-miR-6768-3p  | XM_017004619 | NLRC4 | 0.00043678  | CDS  |
| hsa-miR-6769a-5p | XM_017004619 | NLRC4 | 0.003558933 | CDS  |
| hsa-miR-6769a-5p | XM_017004619 | NLRC4 | 0.08871414  | CDS  |
| hsa-miR-6769a-5p | XM_017004619 | NLRC4 | 0.04450285  | CDS  |
| hsa-miR-6769a-3p | XM_017004619 | NLRC4 | 8.56E-06    | CDS  |
| hsa-miR-6770-5p  | XM_017004619 | NLRC4 | 0.004509441 | CDS  |
| hsa-miR-6770-3p  | XM_017004619 | NLRC4 | 1.16E-05    | CDS  |
| hsa-miR-6770-3p  | XM_017004619 | NLRC4 | 0.003473051 | CDS  |
| hsa-miR-6770-3p  | XM_017004619 | NLRC4 | 0.003651178 | CDS  |
| hsa-miR-6771-5p  | XM_017004619 | NLRC4 | 6.44E-05    | CDS  |
| hsa-miR-6771-5p  | XM_017004619 | NLRC4 | 0.001031207 | CDS  |
| hsa-miR-6771-3p  | XM_017004619 | NLRC4 | 7.76E-05    | CDS  |
| hsa-miR-6771-3p  | XM_017004619 | NLRC4 | 8.38E-06    | CDS  |
| hsa-miR-6772-5p  | XM_017004619 | NLRC4 | 0.000608953 | CDS  |
| hsa-miR-6772-5p  | XM_017004619 | NLRC4 | 4.43E-05    | CDS  |
| hsa-miR-6772-5p  | XM_017004619 | NLRC4 | 7.36E-05    | CDS  |

|                 |              |       |             |      |
|-----------------|--------------|-------|-------------|------|
| hsa-miR-6772-3p | XM_017004619 | NLRC4 | 0.000362454 | CDS  |
| hsa-miR-6772-3p | XM_017004619 | NLRC4 | 0.001519754 | CDS  |
| hsa-miR-6773-5p | XM_017004619 | NLRC4 | 0.000132382 | CDS  |
| hsa-miR-6773-5p | XM_017004619 | NLRC4 | 3.41E-07    | CDS  |
| hsa-miR-6773-3p | XM_017004619 | NLRC4 | 0.009187106 | CDS  |
| hsa-miR-6774-5p | XM_017004619 | NLRC4 | 8.80E-06    | CDS  |
| hsa-miR-6774-3p | XM_017004619 | NLRC4 | 0.008234576 | CDS  |
| hsa-miR-6775-5p | XM_017004619 | NLRC4 | 0.000671559 | CDS  |
| hsa-miR-6776-5p | XM_017004619 | NLRC4 | 0.2724825   | CDS  |
| hsa-miR-6776-3p | XM_017004619 | NLRC4 | 0.006567177 | CDS  |
| hsa-miR-6777-5p | XM_017004619 | NLRC4 | 0.0264118   | CDS  |
| hsa-miR-6777-5p | XM_017004619 | NLRC4 | 1.49E-05    | CDS  |
| hsa-miR-6777-5p | XM_017004619 | NLRC4 | 0.00237631  | CDS  |
| hsa-miR-6778-5p | XM_017004619 | NLRC4 | 0.000345859 | CDS  |
| hsa-miR-6778-5p | XM_017004619 | NLRC4 | 0.02308038  | CDS  |
| hsa-miR-6778-5p | XM_017004619 | NLRC4 | 0.02214725  | 5UTR |
| hsa-miR-6779-5p | XM_017004619 | NLRC4 | 0.009056833 | CDS  |
| hsa-miR-6779-5p | XM_017004619 | NLRC4 | 0.1399983   | CDS  |
| hsa-miR-6779-5p | XM_017004619 | NLRC4 | 0.000135949 | CDS  |
| hsa-miR-6779-3p | XM_017004619 | NLRC4 | 1.46E-05    | CDS  |
| hsa-miR-6779-3p | XM_017004619 | NLRC4 | 0.000337721 | 3UTR |
| hsa-miR-6781-5p | XM_017004619 | NLRC4 | 2.55E-05    | CDS  |
| hsa-miR-6781-5p | XM_017004619 | NLRC4 | 0.000671559 | CDS  |
| hsa-miR-6781-3p | XM_017004619 | NLRC4 | 0.000326687 | CDS  |
| hsa-miR-6781-3p | XM_017004619 | NLRC4 | 0.000337721 | 3UTR |
| hsa-miR-6782-5p | XM_017004619 | NLRC4 | 9.25E-07    | CDS  |
| hsa-miR-6782-3p | XM_017004619 | NLRC4 | 0.000166253 | CDS  |
| hsa-miR-6782-3p | XM_017004619 | NLRC4 | 0.00015002  | CDS  |
| hsa-miR-6783-5p | XM_017004619 | NLRC4 | 0.01246415  | CDS  |
| hsa-miR-6783-5p | XM_017004619 | NLRC4 | 0.05611306  | CDS  |
| hsa-miR-6783-3p | XM_017004619 | NLRC4 | 0.06177347  | CDS  |
| hsa-miR-6783-3p | XM_017004619 | NLRC4 | 0.000583201 | CDS  |
| hsa-miR-6784-5p | XM_017004619 | NLRC4 | 1.00E-06    | CDS  |
| hsa-miR-6784-5p | XM_017004619 | NLRC4 | 6.15E-05    | CDS  |
| hsa-miR-6784-3p | XM_017004619 | NLRC4 | 4.84E-07    | CDS  |
| hsa-miR-6785-5p | XM_017004619 | NLRC4 | 0.000142999 | CDS  |
| hsa-miR-6785-3p | XM_017004619 | NLRC4 | 3.57E-05    | CDS  |
| hsa-miR-6785-3p | XM_017004619 | NLRC4 | 0.000239915 | CDS  |
| hsa-miR-6786-5p | XM_017004619 | NLRC4 | 1.85E-05    | CDS  |
| hsa-miR-6786-5p | XM_017004619 | NLRC4 | 0.003456785 | CDS  |
| hsa-miR-6786-3p | XM_017004619 | NLRC4 | 0.000542025 | CDS  |
| hsa-miR-6786-3p | XM_017004619 | NLRC4 | 0.04142576  | CDS  |
| hsa-miR-6787-5p | XM_017004619 | NLRC4 | 9.39E-05    | CDS  |
| hsa-miR-6787-5p | XM_017004619 | NLRC4 | 0.001644724 | CDS  |

|                 |              |       |             |      |
|-----------------|--------------|-------|-------------|------|
| hsa-miR-6787-3p | XM_017004619 | NLRC4 | 0.007691023 | CDS  |
| hsa-miR-6789-5p | XM_017004619 | NLRC4 | 1.24E-05    | CDS  |
| hsa-miR-6789-3p | XM_017004619 | NLRC4 | 0.00151455  | CDS  |
| hsa-miR-6789-3p | XM_017004619 | NLRC4 | 0.001218159 | CDS  |
| hsa-miR-6790-5p | XM_017004619 | NLRC4 | 0.000570492 | CDS  |
| hsa-miR-6790-5p | XM_017004619 | NLRC4 | 0.08189838  | CDS  |
| hsa-miR-6790-5p | XM_017004619 | NLRC4 | 0.01718499  | CDS  |
| hsa-miR-6790-3p | XM_017004619 | NLRC4 | 6.12E-05    | 3UTR |
| hsa-miR-6791-5p | XM_017004619 | NLRC4 | 6.33E-06    | CDS  |
| hsa-miR-6791-3p | XM_017004619 | NLRC4 | 5.25E-05    | CDS  |
| hsa-miR-6791-3p | XM_017004619 | NLRC4 | 0.000612062 | CDS  |
| hsa-miR-6791-3p | XM_017004619 | NLRC4 | 5.93E-05    | 3UTR |
| hsa-miR-6792-5p | XM_017004619 | NLRC4 | 1.00E-06    | CDS  |
| hsa-miR-6792-5p | XM_017004619 | NLRC4 | 0.000165293 | CDS  |
| hsa-miR-6792-3p | XM_017004619 | NLRC4 | 0.000225565 | CDS  |
| hsa-miR-6792-3p | XM_017004619 | NLRC4 | 0.001408827 | CDS  |
| hsa-miR-6793-5p | XM_017004619 | NLRC4 | 0.01465807  | CDS  |
| hsa-miR-6793-5p | XM_017004619 | NLRC4 | 0.0645003   | CDS  |
| hsa-miR-6793-5p | XM_017004619 | NLRC4 | 1.19E-06    | CDS  |
| hsa-miR-6793-5p | XM_017004619 | NLRC4 | 0.001754209 | CDS  |
| hsa-miR-6793-3p | XM_017004619 | NLRC4 | 8.38E-06    | CDS  |
| hsa-miR-6794-5p | XM_017004619 | NLRC4 | 0.001661235 | CDS  |
| hsa-miR-6795-5p | XM_017004619 | NLRC4 | 0.01000834  | CDS  |
| hsa-miR-6795-5p | XM_017004619 | NLRC4 | 0.00034557  | CDS  |
| hsa-miR-6796-5p | XM_017004619 | NLRC4 | 1.19E-06    | CDS  |
| hsa-miR-6796-3p | XM_017004619 | NLRC4 | 0.000963264 | CDS  |
| hsa-miR-6797-5p | XM_017004619 | NLRC4 | 0.03545045  | CDS  |
| hsa-miR-6797-5p | XM_017004619 | NLRC4 | 0.01069605  | CDS  |
| hsa-miR-6797-3p | XM_017004619 | NLRC4 | 2.08E-05    | CDS  |
| hsa-miR-6798-5p | XM_017004619 | NLRC4 | 9.25E-07    | CDS  |
| hsa-miR-6798-5p | XM_017004619 | NLRC4 | 0.008073378 | CDS  |
| hsa-miR-6798-5p | XM_017004619 | NLRC4 | 0.02352991  | CDS  |
| hsa-miR-6799-5p | XM_017004619 | NLRC4 | 0.000598122 | CDS  |
| hsa-miR-6799-5p | XM_017004619 | NLRC4 | 0.02837663  | CDS  |
| hsa-miR-6799-5p | XM_017004619 | NLRC4 | 6.44E-05    | CDS  |
| hsa-miR-6799-3p | XM_017004619 | NLRC4 | 7.95E-06    | CDS  |
| hsa-miR-6799-3p | XM_017004619 | NLRC4 | 8.12E-06    | CDS  |
| hsa-miR-6800-3p | XM_017004619 | NLRC4 | 0.000802077 | CDS  |
| hsa-miR-6801-5p | XM_017004619 | NLRC4 | 0.01181189  | CDS  |
| hsa-miR-6801-3p | XM_017004619 | NLRC4 | 0.000612062 | CDS  |
| hsa-miR-6802-5p | XM_017004619 | NLRC4 | 0.1399983   | CDS  |
| hsa-miR-6802-5p | XM_017004619 | NLRC4 | 0.01105221  | CDS  |
| hsa-miR-6802-3p | XM_017004619 | NLRC4 | 0.008234576 | CDS  |
| hsa-miR-6803-3p | XM_017004619 | NLRC4 | 0.000583201 | CDS  |

|                 |              |       |             |      |
|-----------------|--------------|-------|-------------|------|
| hsa-miR-6803-3p | XM_017004619 | NLRC4 | 0.000106281 | CDS  |
| hsa-miR-6804-5p | XM_017004619 | NLRC4 | 0.001239845 | CDS  |
| hsa-miR-6804-3p | XM_017004619 | NLRC4 | 2.28E-05    | CDS  |
| hsa-miR-6805-5p | XM_017004619 | NLRC4 | 9.62E-07    | CDS  |
| hsa-miR-6805-5p | XM_017004619 | NLRC4 | 0.01250097  | CDS  |
| hsa-miR-6805-5p | XM_017004619 | NLRC4 | 0.000133333 | CDS  |
| hsa-miR-6805-3p | XM_017004619 | NLRC4 | 1.22E-05    | CDS  |
| hsa-miR-6805-3p | XM_017004619 | NLRC4 | 0.04729951  | CDS  |
| hsa-miR-6806-5p | XM_017004619 | NLRC4 | 0.000235798 | CDS  |
| hsa-miR-6806-3p | XM_017004619 | NLRC4 | 1.10E-08    | CDS  |
| hsa-miR-6806-3p | XM_017004619 | NLRC4 | 0.000233688 | CDS  |
| hsa-miR-6806-3p | XM_017004619 | NLRC4 | 0.000272475 | CDS  |
| hsa-miR-6807-5p | XM_017004619 | NLRC4 | 0.001956377 | 5UTR |
| hsa-miR-6807-3p | XM_017004619 | NLRC4 | 0.01106226  | CDS  |
| hsa-miR-6807-3p | XM_017004619 | NLRC4 | 2.28E-05    | CDS  |
| hsa-miR-6807-3p | XM_017004619 | NLRC4 | 0.001519754 | CDS  |
| hsa-miR-6808-5p | XM_017004619 | NLRC4 | 0.00107409  | CDS  |
| hsa-miR-6808-3p | XM_017004619 | NLRC4 | 7.92E-05    | CDS  |
| hsa-miR-6809-5p | XM_017004619 | NLRC4 | 0.0268879   | CDS  |
| hsa-miR-6810-5p | XM_017004619 | NLRC4 | 0.000511852 | CDS  |
| hsa-miR-6810-5p | XM_017004619 | NLRC4 | 0.001088706 | CDS  |
| hsa-miR-6810-3p | XM_017004619 | NLRC4 | 0.000719145 | CDS  |
| hsa-miR-6811-5p | XM_017004619 | NLRC4 | 0.000165293 | CDS  |
| hsa-miR-6812-5p | XM_017004619 | NLRC4 | 0.000297589 | CDS  |
| hsa-miR-6813-5p | XM_017004619 | NLRC4 | 9.25E-07    | CDS  |
| hsa-miR-6813-5p | XM_017004619 | NLRC4 | 9.69E-05    | 3UTR |
| hsa-miR-6815-5p | XM_017004619 | NLRC4 | 4.03E-05    | CDS  |
| hsa-miR-6815-5p | XM_017004619 | NLRC4 | 0.000379735 | CDS  |
| hsa-miR-6815-3p | XM_017004619 | NLRC4 | 1.47E-05    | CDS  |
| hsa-miR-6816-5p | XM_017004619 | NLRC4 | 0.000235798 | CDS  |
| hsa-miR-6816-5p | XM_017004619 | NLRC4 | 0.03847363  | CDS  |
| hsa-miR-6817-5p | XM_017004619 | NLRC4 | 6.31E-05    | 3UTR |
| hsa-miR-6817-5p | XM_017004619 | NLRC4 | 2.68E-06    | CDS  |
| hsa-miR-6818-5p | XM_017004619 | NLRC4 | 0.001053639 | CDS  |
| hsa-miR-6818-3p | XM_017004619 | NLRC4 | 0.04729951  | CDS  |
| hsa-miR-6819-5p | XM_017004619 | NLRC4 | 3.17E-07    | CDS  |
| hsa-miR-6819-5p | XM_017004619 | NLRC4 | 0.000834806 | CDS  |
| hsa-miR-6819-5p | XM_017004619 | NLRC4 | 0.000608953 | CDS  |
| hsa-miR-6820-5p | XM_017004619 | NLRC4 | 0.1222725   | CDS  |
| hsa-miR-6820-5p | XM_017004619 | NLRC4 | 0.02113113  | CDS  |
| hsa-miR-6820-5p | XM_017004619 | NLRC4 | 0.008824709 | CDS  |
| hsa-miR-6820-3p | XM_017004619 | NLRC4 | 0.000123515 | CDS  |
| hsa-miR-6820-3p | XM_017004619 | NLRC4 | 0.03794919  | CDS  |
| hsa-miR-6820-3p | XM_017004619 | NLRC4 | 5.56E-06    | CDS  |

|                  |              |       |             |      |
|------------------|--------------|-------|-------------|------|
| hsa-miR-6821-5p  | XM_017004619 | NLRC4 | 2.73E-06    | CDS  |
| hsa-miR-6821-5p  | XM_017004619 | NLRC4 | 1.35E-06    | CDS  |
| hsa-miR-6821-5p  | XM_017004619 | NLRC4 | 8.12E-06    | CDS  |
| hsa-miR-6821-5p  | XM_017004619 | NLRC4 | 0.002263662 | CDS  |
| hsa-miR-6821-3p  | XM_017004619 | NLRC4 | 0.000215389 | CDS  |
| hsa-miR-6822-5p  | XM_017004619 | NLRC4 | 0.000956925 | CDS  |
| hsa-miR-6822-3p  | XM_017004619 | NLRC4 | 2.04E-05    | CDS  |
| hsa-miR-6823-5p  | XM_017004619 | NLRC4 | 0.06687653  | CDS  |
| hsa-miR-6823-5p  | XM_017004619 | NLRC4 | 0.007047336 | CDS  |
| hsa-miR-6823-3p  | XM_017004619 | NLRC4 | 0.000630286 | CDS  |
| hsa-miR-6824-5p  | XM_017004619 | NLRC4 | 0.01058857  | CDS  |
| hsa-miR-6824-3p  | XM_017004619 | NLRC4 | 3.99E-05    | CDS  |
| hsa-miR-6825-5p  | XM_017004619 | NLRC4 | 0.08871414  | CDS  |
| hsa-miR-6825-5p  | XM_017004619 | NLRC4 | 0.000142999 | CDS  |
| hsa-miR-6825-5p  | XM_017004619 | NLRC4 | 0.001239845 | CDS  |
| hsa-miR-6825-3p  | XM_017004619 | NLRC4 | 2.28E-05    | CDS  |
| hsa-miR-6825-3p  | XM_017004619 | NLRC4 | 0.01228227  | CDS  |
| hsa-miR-6826-5p  | XM_017004619 | NLRC4 | 0.02668285  | CDS  |
| hsa-miR-6826-3p  | XM_017004619 | NLRC4 | 0.000225565 | CDS  |
| hsa-miR-6826-3p  | XM_017004619 | NLRC4 | 0.000583201 | CDS  |
| hsa-miR-6827-5p  | XM_017004619 | NLRC4 | 2.09E-06    | CDS  |
| hsa-miR-6827-3p  | XM_017004619 | NLRC4 | 0.000337721 | 3UTR |
| hsa-miR-6828-5p  | XM_017004619 | NLRC4 | 0.00180674  | CDS  |
| hsa-miR-6828-3p  | XM_017004619 | NLRC4 | 8.36E-05    | 3UTR |
| hsa-miR-6829-5p  | XM_017004619 | NLRC4 | 0.000297589 | CDS  |
| hsa-miR-6829-3p  | XM_017004619 | NLRC4 | 7.69E-05    | CDS  |
| hsa-miR-6829-3p  | XM_017004619 | NLRC4 | 2.98E-05    | CDS  |
| hsa-miR-6829-3p  | XM_017004619 | NLRC4 | 0.001022618 | CDS  |
| hsa-miR-6830-5p  | XM_017004619 | NLRC4 | 0.07138354  | CDS  |
| hsa-miR-6830-3p  | XM_017004619 | NLRC4 | 0.1045722   | CDS  |
| hsa-miR-6831-5p  | XM_017004619 | NLRC4 | 0.0264118   | CDS  |
| hsa-miR-6832-5p  | XM_017004619 | NLRC4 | 1.85E-05    | CDS  |
| hsa-miR-6833-3p  | XM_017004619 | NLRC4 | 0.000199878 | CDS  |
| hsa-miR-6833-3p  | XM_017004619 | NLRC4 | 0.000719145 | CDS  |
| hsa-miR-6834-5p  | XM_017004619 | NLRC4 | 0.01058857  | CDS  |
| hsa-miR-6834-5p  | XM_017004619 | NLRC4 | 2.48E-06    | CDS  |
| hsa-miR-6834-3p  | XM_017004619 | NLRC4 | 0.004370877 | CDS  |
| hsa-miR-6835-3p  | XM_017004619 | NLRC4 | 2.59E-05    | CDS  |
| hsa-miR-6780b-5p | XM_017004619 | NLRC4 | 1.13E-05    | CDS  |
| hsa-miR-6780b-5p | XM_017004619 | NLRC4 | 0.000150393 | CDS  |
| hsa-miR-6780b-3p | XM_017004619 | NLRC4 | 0.000612062 | CDS  |
| hsa-miR-6780b-3p | XM_017004619 | NLRC4 | 0.009331195 | CDS  |
| hsa-miR-6836-5p  | XM_017004619 | NLRC4 | 5.90E-05    | CDS  |
| hsa-miR-6836-5p  | XM_017004619 | NLRC4 | 2.59E-05    | CDS  |

|                 |              |       |             |      |
|-----------------|--------------|-------|-------------|------|
| hsa-miR-6836-5p | XM_017004619 | NLRC4 | 0.000264029 | CDS  |
| hsa-miR-6836-3p | XM_017004619 | NLRC4 | 2.92E-05    | CDS  |
| hsa-miR-6837-5p | XM_017004619 | NLRC4 | 0.001670037 | CDS  |
| hsa-miR-6837-5p | XM_017004619 | NLRC4 | 7.18E-05    | CDS  |
| hsa-miR-6837-3p | XM_017004619 | NLRC4 | 6.44E-07    | CDS  |
| hsa-miR-6837-3p | XM_017004619 | NLRC4 | 0.00095499  | CDS  |
| hsa-miR-6837-3p | XM_017004619 | NLRC4 | 0.003065349 | CDS  |
| hsa-miR-6838-5p | XM_017004619 | NLRC4 | 4.93E-05    | CDS  |
| hsa-miR-6838-5p | XM_017004619 | NLRC4 | 6.12E-08    | CDS  |
| hsa-miR-6838-3p | XM_017004619 | NLRC4 | 4.96E-05    | CDS  |
| hsa-miR-6838-3p | XM_017004619 | NLRC4 | 0.000542111 | CDS  |
| hsa-miR-6839-5p | XM_017004619 | NLRC4 | 0.02595679  | CDS  |
| hsa-miR-6839-5p | XM_017004619 | NLRC4 | 0.002919858 | 5UTR |
| hsa-miR-6840-5p | XM_017004619 | NLRC4 | 0.003963322 | CDS  |
| hsa-miR-6840-5p | XM_017004619 | NLRC4 | 0.001218159 | CDS  |
| hsa-miR-6840-5p | XM_017004619 | NLRC4 | 4.84E-07    | CDS  |
| hsa-miR-6840-3p | XM_017004619 | NLRC4 | 1.52E-06    | CDS  |
| hsa-miR-6841-5p | XM_017004619 | NLRC4 | 6.21E-05    | CDS  |
| hsa-miR-6841-5p | XM_017004619 | NLRC4 | 0.000264029 | CDS  |
| hsa-miR-6841-5p | XM_017004619 | NLRC4 | 4.59E-05    | CDS  |
| hsa-miR-6841-3p | XM_017004619 | NLRC4 | 0.00027781  | CDS  |
| hsa-miR-6841-3p | XM_017004619 | NLRC4 | 0.000215389 | CDS  |
| hsa-miR-6842-5p | XM_017004619 | NLRC4 | 4.95E-07    | CDS  |
| hsa-miR-6842-5p | XM_017004619 | NLRC4 | 0.000511852 | CDS  |
| hsa-miR-6842-5p | XM_017004619 | NLRC4 | 0.01247752  | CDS  |
| hsa-miR-6842-3p | XM_017004619 | NLRC4 | 0.001503355 | CDS  |
| hsa-miR-6842-3p | XM_017004619 | NLRC4 | 0.008288481 | CDS  |
| hsa-miR-6842-3p | XM_017004619 | NLRC4 | 1.35E-05    | CDS  |
| hsa-miR-6843-3p | XM_017004619 | NLRC4 | 1.60E-06    | CDS  |
| hsa-miR-6845-5p | XM_017004619 | NLRC4 | 9.56E-06    | CDS  |
| hsa-miR-6845-3p | XM_017004619 | NLRC4 | 6.44E-07    | CDS  |
| hsa-miR-6846-5p | XM_017004619 | NLRC4 | 0.2077442   | CDS  |
| hsa-miR-6846-5p | XM_017004619 | NLRC4 | 0.000297589 | CDS  |
| hsa-miR-6846-3p | XM_017004619 | NLRC4 | 0.000411356 | 3UTR |
| hsa-miR-6846-3p | XM_017004619 | NLRC4 | 0.0210857   | CDS  |
| hsa-miR-6847-5p | XM_017004619 | NLRC4 | 1.63E-06    | CDS  |
| hsa-miR-6847-5p | XM_017004619 | NLRC4 | 0.000100105 | CDS  |
| hsa-miR-6847-5p | XM_017004619 | NLRC4 | 0.00091255  | CDS  |
| hsa-miR-6847-3p | XM_017004619 | NLRC4 | 2.03E-05    | 5UTR |
| hsa-miR-6847-3p | XM_017004619 | NLRC4 | 0.02194376  | CDS  |
| hsa-miR-6848-5p | XM_017004619 | NLRC4 | 0.000511852 | CDS  |
| hsa-miR-6848-5p | XM_017004619 | NLRC4 | 9.62E-07    | CDS  |
| hsa-miR-6848-3p | XM_017004619 | NLRC4 | 0.000361045 | 3UTR |
| hsa-miR-6849-3p | XM_017004619 | NLRC4 | 6.06E-05    | CDS  |



|                  |              |       |             |     |
|------------------|--------------|-------|-------------|-----|
| hsa-miR-6850-5p  | XM_017004619 | NLRC4 | 8.81E-06    | CDS |
| hsa-miR-6850-3p  | XM_017004619 | NLRC4 | 1.83E-05    | CDS |
| hsa-miR-6850-3p  | XM_017004619 | NLRC4 | 6.15E-05    | CDS |
| hsa-miR-6851-5p  | XM_017004619 | NLRC4 | 1.00E-06    | CDS |
| hsa-miR-6851-5p  | XM_017004619 | NLRC4 | 0.08802059  | CDS |
| hsa-miR-6851-3p  | XM_017004619 | NLRC4 | 0.000612062 | CDS |
| hsa-miR-6852-5p  | XM_017004619 | NLRC4 | 0.002217478 | CDS |
| hsa-miR-6854-5p  | XM_017004619 | NLRC4 | 6.12E-08    | CDS |
| hsa-miR-6854-5p  | XM_017004619 | NLRC4 | 0.001185525 | CDS |
| hsa-miR-6854-5p  | XM_017004619 | NLRC4 | 1.41E-06    | CDS |
| hsa-miR-6854-3p  | XM_017004619 | NLRC4 | 0.01228227  | CDS |
| hsa-miR-6855-5p  | XM_017004619 | NLRC4 | 0.000478711 | CDS |
| hsa-miR-6855-5p  | XM_017004619 | NLRC4 | 0.000170577 | CDS |
| hsa-miR-6855-5p  | XM_017004619 | NLRC4 | 0.02468582  | CDS |
| hsa-miR-6856-5p  | XM_017004619 | NLRC4 | 0.005224415 | CDS |
| hsa-miR-6856-5p  | XM_017004619 | NLRC4 | 0.00237631  | CDS |
| hsa-miR-6857-5p  | XM_017004619 | NLRC4 | 0.000511852 | CDS |
| hsa-miR-6857-5p  | XM_017004619 | NLRC4 | 0.000511852 | CDS |
| hsa-miR-6857-5p  | XM_017004619 | NLRC4 | 0.03847363  | CDS |
| hsa-miR-6857-3p  | XM_017004619 | NLRC4 | 2.06E-05    | CDS |
| hsa-miR-6857-3p  | XM_017004619 | NLRC4 | 0.000103244 | CDS |
| hsa-miR-6858-5p  | XM_017004619 | NLRC4 | 0.009417785 | CDS |
| hsa-miR-6858-3p  | XM_017004619 | NLRC4 | 0.001172201 | CDS |
| hsa-miR-6858-3p  | XM_017004619 | NLRC4 | 2.79E-05    | CDS |
| hsa-miR-6858-3p  | XM_017004619 | NLRC4 | 7.45E-06    | CDS |
| hsa-miR-6859-5p  | XM_017004619 | NLRC4 | 0.01069605  | CDS |
| hsa-miR-6859-5p  | XM_017004619 | NLRC4 | 0.000654256 | CDS |
| hsa-miR-6859-5p  | XM_017004619 | NLRC4 | 9.13E-05    | CDS |
| hsa-miR-6859-3p  | XM_017004619 | NLRC4 | 5.54E-06    | CDS |
| hsa-miR-6859-3p  | XM_017004619 | NLRC4 | 0.000612062 | CDS |
| hsa-miR-6769b-5p | XM_017004619 | NLRC4 | 0.008120752 | CDS |
| hsa-miR-6769b-3p | XM_017004619 | NLRC4 | 0.000225565 | CDS |
| hsa-miR-6860     | XM_017004619 | NLRC4 | 0.00216149  | CDS |
| hsa-miR-6860     | XM_017004619 | NLRC4 | 0.1399983   | CDS |
| hsa-miR-6861-5p  | XM_017004619 | NLRC4 | 0.1399983   | CDS |
| hsa-miR-6861-5p  | XM_017004619 | NLRC4 | 0.08241963  | CDS |
| hsa-miR-6861-3p  | XM_017004619 | NLRC4 | 4.79E-06    | CDS |
| hsa-miR-6861-3p  | XM_017004619 | NLRC4 | 5.34E-05    | CDS |
| hsa-miR-6862-5p  | XM_017004619 | NLRC4 | 0.000671559 | CDS |
| hsa-miR-6862-3p  | XM_017004619 | NLRC4 | 1.12E-05    | CDS |
| hsa-miR-6863     | XM_017004619 | NLRC4 | 0.00293663  | CDS |
| hsa-miR-6863     | XM_017004619 | NLRC4 | 0.009417785 | CDS |
| hsa-miR-6864-5p  | XM_017004619 | NLRC4 | 0.004849261 | CDS |
| hsa-miR-6865-5p  | XM_017004619 | NLRC4 | 0.001394641 | CDS |

|                 |              |       |             |      |
|-----------------|--------------|-------|-------------|------|
| hsa-miR-6865-5p | XM_017004619 | NLRC4 | 0.0101559   | CDS  |
| hsa-miR-6865-5p | XM_017004619 | NLRC4 | 0.001023348 | CDS  |
| hsa-miR-6866-5p | XM_017004619 | NLRC4 | 4.87E-05    | 3UTR |
| hsa-miR-6866-3p | XM_017004619 | NLRC4 | 0.01235071  | 5UTR |
| hsa-miR-6866-3p | XM_017004619 | NLRC4 | 0.00199289  | CDS  |
| hsa-miR-6867-5p | XM_017004619 | NLRC4 | 0.03296809  | CDS  |
| hsa-miR-6868-3p | XM_017004619 | NLRC4 | 0.004537093 | CDS  |
| hsa-miR-6868-3p | XM_017004619 | NLRC4 | 0.0037024   | CDS  |
| hsa-miR-6868-3p | XM_017004619 | NLRC4 | 1.08E-05    | CDS  |
| hsa-miR-6869-5p | XM_017004619 | NLRC4 | 8.97E-05    | CDS  |
| hsa-miR-6869-5p | XM_017004619 | NLRC4 | 1.97E-05    | CDS  |
| hsa-miR-6869-5p | XM_017004619 | NLRC4 | 0.02289173  | CDS  |
| hsa-miR-6869-3p | XM_017004619 | NLRC4 | 4.11E-05    | 3UTR |
| hsa-miR-6869-3p | XM_017004619 | NLRC4 | 1.77E-06    | CDS  |
| hsa-miR-6870-5p | XM_017004619 | NLRC4 | 0.2077442   | CDS  |
| hsa-miR-6870-5p | XM_017004619 | NLRC4 | 0.1188673   | CDS  |
| hsa-miR-6871-5p | XM_017004619 | NLRC4 | 5.90E-05    | CDS  |
| hsa-miR-6871-5p | XM_017004619 | NLRC4 | 0.000334534 | CDS  |
| hsa-miR-6872-5p | XM_017004619 | NLRC4 | 8.75E-06    | CDS  |
| hsa-miR-6872-3p | XM_017004619 | NLRC4 | 0.004370877 | CDS  |
| hsa-miR-6873-5p | XM_017004619 | NLRC4 | 0.01473863  | CDS  |
| hsa-miR-6873-3p | XM_017004619 | NLRC4 | 0.000135215 | CDS  |
| hsa-miR-6874-5p | XM_017004619 | NLRC4 | 0.000138684 | 3UTR |
| hsa-miR-6874-3p | XM_017004619 | NLRC4 | 0.01885488  | CDS  |
| hsa-miR-6874-3p | XM_017004619 | NLRC4 | 0.000272475 | CDS  |
| hsa-miR-6875-3p | XM_017004619 | NLRC4 | 0.001206662 | CDS  |
| hsa-miR-6875-3p | XM_017004619 | NLRC4 | 0.00118012  | CDS  |
| hsa-miR-6875-3p | XM_017004619 | NLRC4 | 0.02486339  | CDS  |
| hsa-miR-6876-5p | XM_017004619 | NLRC4 | 0.0264118   | CDS  |
| hsa-miR-6876-3p | XM_017004619 | NLRC4 | 0.03794919  | CDS  |
| hsa-miR-6877-5p | XM_017004619 | NLRC4 | 0.001447161 | CDS  |
| hsa-miR-6877-5p | XM_017004619 | NLRC4 | 0.002224226 | CDS  |
| hsa-miR-6877-3p | XM_017004619 | NLRC4 | 0.000645022 | 3UTR |
| hsa-miR-6878-3p | XM_017004619 | NLRC4 | 0.000772438 | CDS  |
| hsa-miR-6879-5p | XM_017004619 | NLRC4 | 0.000144025 | CDS  |
| hsa-miR-6879-5p | XM_017004619 | NLRC4 | 0.06013926  | CDS  |
| hsa-miR-6880-5p | XM_017004619 | NLRC4 | 0.0268879   | CDS  |
| hsa-miR-6880-5p | XM_017004619 | NLRC4 | 0.002365478 | CDS  |
| hsa-miR-6880-3p | XM_017004619 | NLRC4 | 0.000447996 | CDS  |
| hsa-miR-6880-3p | XM_017004619 | NLRC4 | 0.02047911  | CDS  |
| hsa-miR-6881-3p | XM_017004619 | NLRC4 | 0.000215389 | CDS  |
| hsa-miR-6882-3p | XM_017004619 | NLRC4 | 6.12E-05    | 3UTR |
| hsa-miR-6883-5p | XM_017004619 | NLRC4 | 0.1547776   | CDS  |
| hsa-miR-6883-5p | XM_017004619 | NLRC4 | 0.0645003   | CDS  |

|                 |              |       |             |      |
|-----------------|--------------|-------|-------------|------|
| hsa-miR-6883-5p | XM_017004619 | NLRC4 | 1.13E-05    | CDS  |
| hsa-miR-6883-3p | XM_017004619 | NLRC4 | 0.000583201 | CDS  |
| hsa-miR-6883-3p | XM_017004619 | NLRC4 | 0.000106281 | CDS  |
| hsa-miR-6884-5p | XM_017004619 | NLRC4 | 4.35E-05    | CDS  |
| hsa-miR-6884-3p | XM_017004619 | NLRC4 | 0.000337721 | 3UTR |
| hsa-miR-6885-5p | XM_017004619 | NLRC4 | 0.000207579 | CDS  |
| hsa-miR-6885-3p | XM_017004619 | NLRC4 | 0.000378314 | CDS  |
| hsa-miR-6885-3p | XM_017004619 | NLRC4 | 0.007691023 | CDS  |
| hsa-miR-6886-5p | XM_017004619 | NLRC4 | 0.000120896 | CDS  |
| hsa-miR-6886-5p | XM_017004619 | NLRC4 | 0.00107409  | CDS  |
| hsa-miR-6886-3p | XM_017004619 | NLRC4 | 0.000583201 | CDS  |
| hsa-miR-6887-5p | XM_017004619 | NLRC4 | 0.000297589 | CDS  |
| hsa-miR-6887-5p | XM_017004619 | NLRC4 | 2.28E-05    | CDS  |
| hsa-miR-6887-3p | XM_017004619 | NLRC4 | 0.000583201 | CDS  |
| hsa-miR-6887-3p | XM_017004619 | NLRC4 | 0.000719145 | CDS  |
| hsa-miR-6888-5p | XM_017004619 | NLRC4 | 0.001409008 | CDS  |
| hsa-miR-6888-3p | XM_017004619 | NLRC4 | 8.36E-05    | 3UTR |
| hsa-miR-6889-5p | XM_017004619 | NLRC4 | 0.1188673   | CDS  |
| hsa-miR-6889-5p | XM_017004619 | NLRC4 | 0.00086116  | CDS  |
| hsa-miR-6889-3p | XM_017004619 | NLRC4 | 0.01223285  | CDS  |
| hsa-miR-6890-5p | XM_017004619 | NLRC4 | 0.000235798 | CDS  |
| hsa-miR-6890-5p | XM_017004619 | NLRC4 | 0.03694075  | CDS  |
| hsa-miR-6890-3p | XM_017004619 | NLRC4 | 0.000337721 | 3UTR |
| hsa-miR-6891-5p | XM_017004619 | NLRC4 | 0.07765027  | CDS  |
| hsa-miR-6891-5p | XM_017004619 | NLRC4 | 0.000163267 | CDS  |
| hsa-miR-6892-5p | XM_017004619 | NLRC4 | 7.36E-05    | CDS  |
| hsa-miR-6892-5p | XM_017004619 | NLRC4 | 0.001027397 | CDS  |
| hsa-miR-6892-5p | XM_017004619 | NLRC4 | 0.04749199  | CDS  |
| hsa-miR-6892-3p | XM_017004619 | NLRC4 | 0.000719145 | CDS  |
| hsa-miR-6892-3p | XM_017004619 | NLRC4 | 0.000106281 | CDS  |
| hsa-miR-6893-5p | XM_017004619 | NLRC4 | 0.000100105 | CDS  |
| hsa-miR-6893-5p | XM_017004619 | NLRC4 | 9.79E-05    | CDS  |
| hsa-miR-6894-5p | XM_017004619 | NLRC4 | 9.62E-07    | CDS  |
| hsa-miR-6894-5p | XM_017004619 | NLRC4 | 8.25E-06    | CDS  |
| hsa-miR-6894-5p | XM_017004619 | NLRC4 | 0.000598122 | CDS  |
| hsa-miR-6894-5p | XM_017004619 | NLRC4 | 3.18E-05    | CDS  |
| hsa-miR-6895-5p | XM_017004619 | NLRC4 | 1.49E-05    | CDS  |
| hsa-miR-6895-5p | XM_017004619 | NLRC4 | 0.000264029 | CDS  |
| hsa-miR-6895-3p | XM_017004619 | NLRC4 | 0.000406012 | 3UTR |
| hsa-miR-6895-3p | XM_017004619 | NLRC4 | 8.86E-07    | CDS  |
| hsa-miR-7106-5p | XM_017004619 | NLRC4 | 0.05553747  | CDS  |
| hsa-miR-7106-5p | XM_017004619 | NLRC4 | 0.009044755 | CDS  |
| hsa-miR-7106-5p | XM_017004619 | NLRC4 | 0.08882998  | CDS  |
| hsa-miR-7106-3p | XM_017004619 | NLRC4 | 0.000271085 | CDS  |

|                 |              |       |             |      |
|-----------------|--------------|-------|-------------|------|
| hsa-miR-7106-3p | XM_017004619 | NLRC4 | 0.000129339 | CDS  |
| hsa-miR-7107-5p | XM_017004619 | NLRC4 | 4.84E-07    | CDS  |
| hsa-miR-7107-3p | XM_017004619 | NLRC4 | 1.96E-05    | 5UTR |
| hsa-miR-7108-5p | XM_017004619 | NLRC4 | 1.33E-05    | CDS  |
| hsa-miR-7108-3p | XM_017004619 | NLRC4 | 0.00014298  | CDS  |
| hsa-miR-7109-5p | XM_017004619 | NLRC4 | 0.04319399  | CDS  |
| hsa-miR-7109-5p | XM_017004619 | NLRC4 | 7.85E-05    | CDS  |
| hsa-miR-7109-5p | XM_017004619 | NLRC4 | 0.05383761  | CDS  |
| hsa-miR-7109-3p | XM_017004619 | NLRC4 | 0.00015002  | CDS  |
| hsa-miR-7110-5p | XM_017004619 | NLRC4 | 3.17E-07    | CDS  |
| hsa-miR-7110-5p | XM_017004619 | NLRC4 | 0.05611306  | CDS  |
| hsa-miR-7110-3p | XM_017004619 | NLRC4 | 0.000106281 | CDS  |
| hsa-miR-7111-5p | XM_017004619 | NLRC4 | 0.0268879   | CDS  |
| hsa-miR-7111-5p | XM_017004619 | NLRC4 | 3.17E-07    | CDS  |
| hsa-miR-7111-5p | XM_017004619 | NLRC4 | 0.007362526 | CDS  |
| hsa-miR-7111-5p | XM_017004619 | NLRC4 | 0.04053145  | CDS  |
| hsa-miR-7111-3p | XM_017004619 | NLRC4 | 0.000583201 | CDS  |
| hsa-miR-7112-5p | XM_017004619 | NLRC4 | 2.03E-05    | 5UTR |
| hsa-miR-7112-5p | XM_017004619 | NLRC4 | 0.008415762 | CDS  |
| hsa-miR-7112-3p | XM_017004619 | NLRC4 | 0.02815115  | CDS  |
| hsa-miR-7112-3p | XM_017004619 | NLRC4 | 2.08E-05    | CDS  |
| hsa-miR-7113-5p | XM_017004619 | NLRC4 | 5.71E-06    | CDS  |
| hsa-miR-7113-3p | XM_017004619 | NLRC4 | 0.000215389 | CDS  |
| hsa-miR-7114-5p | XM_017004619 | NLRC4 | 0.000570492 | CDS  |
| hsa-miR-7114-5p | XM_017004619 | NLRC4 | 0.000649339 | CDS  |
| hsa-miR-7150    | XM_017004619 | NLRC4 | 0.009056833 | CDS  |
| hsa-miR-7151-5p | XM_017004619 | NLRC4 | 2.60E-05    | 3UTR |
| hsa-miR-7151-5p | XM_017004619 | NLRC4 | 0.000469601 | 3UTR |
| hsa-miR-7151-3p | XM_017004619 | NLRC4 | 9.39E-05    | CDS  |
| hsa-miR-7151-3p | XM_017004619 | NLRC4 | 4.87E-05    | 3UTR |
| hsa-miR-7152-5p | XM_017004619 | NLRC4 | 6.20E-07    | CDS  |
| hsa-miR-7152-5p | XM_017004619 | NLRC4 | 0.000352314 | CDS  |
| hsa-miR-7152-3p | XM_017004619 | NLRC4 | 8.80E-06    | CDS  |
| hsa-miR-7152-3p | XM_017004619 | NLRC4 | 6.19E-05    | CDS  |
| hsa-miR-7154-3p | XM_017004619 | NLRC4 | 0.001014646 | CDS  |
| hsa-miR-7155-5p | XM_017004619 | NLRC4 | 0.05005492  | CDS  |
| hsa-miR-7155-5p | XM_017004619 | NLRC4 | 0.004474328 | CDS  |
| hsa-miR-7155-5p | XM_017004619 | NLRC4 | 5.56E-06    | CDS  |
| hsa-miR-7156-5p | XM_017004619 | NLRC4 | 0.008224432 | CDS  |
| hsa-miR-7156-3p | XM_017004619 | NLRC4 | 0.000150393 | CDS  |
| hsa-miR-7156-3p | XM_017004619 | NLRC4 | 3.55E-05    | CDS  |
| hsa-miR-7156-3p | XM_017004619 | NLRC4 | 0.000324004 | CDS  |
| hsa-miR-7157-5p | XM_017004619 | NLRC4 | 2.75E-07    | CDS  |
| hsa-miR-7157-3p | XM_017004619 | NLRC4 | 6.32E-05    | CDS  |

|                  |              |       |             |      |
|------------------|--------------|-------|-------------|------|
| hsa-miR-7158-5p  | XM_017004619 | NLRC4 | 0.000772438 | CDS  |
| hsa-miR-7158-5p  | XM_017004619 | NLRC4 | 0.004721326 | CDS  |
| hsa-miR-7158-3p  | XM_017004619 | NLRC4 | 0.00024586  | CDS  |
| hsa-miR-7158-3p  | XM_017004619 | NLRC4 | 0.02815115  | CDS  |
| hsa-miR-7161-3p  | XM_017004619 | NLRC4 | 0.00199289  | CDS  |
| hsa-miR-7161-3p  | XM_017004619 | NLRC4 | 0.001727314 | CDS  |
| hsa-miR-7160-5p  | XM_017004619 | NLRC4 | 0.001014772 | CDS  |
| hsa-miR-7160-5p  | XM_017004619 | NLRC4 | 0.01363586  | CDS  |
| hsa-miR-7160-5p  | XM_017004619 | NLRC4 | 0.000923374 | CDS  |
| hsa-miR-7160-3p  | XM_017004619 | NLRC4 | 8.81E-06    | CDS  |
| hsa-miR-7160-3p  | XM_017004619 | NLRC4 | 0.001262872 | CDS  |
| hsa-miR-7162-3p  | XM_017004619 | NLRC4 | 0.08743824  | CDS  |
| hsa-miR-7703     | XM_017004619 | NLRC4 | 6.12E-05    | 3UTR |
| hsa-miR-7703     | XM_017004619 | NLRC4 | 2.28E-05    | CDS  |
| hsa-miR-7704     | XM_017004619 | NLRC4 | 0.000441636 | CDS  |
| hsa-miR-7704     | XM_017004619 | NLRC4 | 4.74E-05    | CDS  |
| hsa-miR-7705     | XM_017004619 | NLRC4 | 4.24E-05    | CDS  |
| hsa-miR-7706     | XM_017004619 | NLRC4 | 1.82E-06    | CDS  |
| hsa-miR-7706     | XM_017004619 | NLRC4 | 2.62E-05    | CDS  |
| hsa-miR-7706     | XM_017004619 | NLRC4 | 0.00329055  | CDS  |
| hsa-miR-7843-5p  | XM_017004619 | NLRC4 | 8.69E-06    | CDS  |
| hsa-miR-7843-5p  | XM_017004619 | NLRC4 | 6.44E-05    | CDS  |
| hsa-miR-7843-5p  | XM_017004619 | NLRC4 | 0.005514936 | CDS  |
| hsa-miR-7843-3p  | XM_017004619 | NLRC4 | 0.000169476 | CDS  |
| hsa-miR-7843-3p  | XM_017004619 | NLRC4 | 2.48E-06    | CDS  |
| hsa-miR-7843-3p  | XM_017004619 | NLRC4 | 0.001064408 | CDS  |
| hsa-miR-4433b-3p | XM_017004619 | NLRC4 | 0.01473863  | CDS  |
| hsa-miR-4433b-3p | XM_017004619 | NLRC4 | 0.001170791 | CDS  |
| hsa-miR-4433b-3p | XM_017004619 | NLRC4 | 0.01459592  | CDS  |
| hsa-miR-1273h-5p | XM_017004619 | NLRC4 | 5.25E-06    | CDS  |
| hsa-miR-1273h-5p | XM_017004619 | NLRC4 | 0.000276588 | 5UTR |
| hsa-miR-1273h-5p | XM_017004619 | NLRC4 | 0.02468582  | CDS  |
| hsa-miR-1273h-3p | XM_017004619 | NLRC4 | 6.12E-05    | 3UTR |
| hsa-miR-6516-5p  | XM_017004619 | NLRC4 | 0.000416659 | CDS  |
| hsa-miR-6516-5p  | XM_017004619 | NLRC4 | 0.000441884 | CDS  |
| hsa-miR-7846-3p  | XM_017004619 | NLRC4 | 0.008073378 | CDS  |
| hsa-miR-7847-3p  | XM_017004619 | NLRC4 | 0.02308038  | CDS  |
| hsa-miR-7847-3p  | XM_017004619 | NLRC4 | 0.001027397 | CDS  |
| hsa-miR-7847-3p  | XM_017004619 | NLRC4 | 0.001445108 | CDS  |
| hsa-miR-7847-3p  | XM_017004619 | NLRC4 | 2.62E-05    | CDS  |
| hsa-miR-7848-3p  | XM_017004619 | NLRC4 | 4.84E-07    | CDS  |
| hsa-miR-7848-3p  | XM_017004619 | NLRC4 | 0.000225565 | CDS  |
| hsa-miR-7849-3p  | XM_017004619 | NLRC4 | 0.001054134 | CDS  |
| hsa-miR-7849-3p  | XM_017004619 | NLRC4 | 0.000722043 | 5UTR |

|                 |              |       |             |      |
|-----------------|--------------|-------|-------------|------|
| hsa-miR-7849-3p | XM_017004619 | NLRC4 | 0.01407431  | CDS  |
| hsa-miR-7850-5p | XM_017004619 | NLRC4 | 0.01693603  | CDS  |
| hsa-miR-7851-3p | XM_017004619 | NLRC4 | 0.1121072   | CDS  |
| hsa-miR-7851-3p | XM_017004619 | NLRC4 | 8.80E-06    | CDS  |
| hsa-miR-7853-5p | XM_017004619 | NLRC4 | 6.41E-06    | CDS  |
| hsa-miR-7854-3p | XM_017004619 | NLRC4 | 0.000407782 | CDS  |
| hsa-miR-7854-3p | XM_017004619 | NLRC4 | 0.000664408 | CDS  |
| hsa-miR-7854-3p | XM_017004619 | NLRC4 | 0.000432941 | CDS  |
| hsa-miR-7856-5p | XM_017004619 | NLRC4 | 0.002224226 | CDS  |
| hsa-miR-7973    | XM_017004619 | NLRC4 | 0.000123515 | CDS  |
| hsa-miR-7974    | XM_017004619 | NLRC4 | 0.02194376  | CDS  |
| hsa-miR-7974    | XM_017004619 | NLRC4 | 0.00037471  | CDS  |
| hsa-miR-7974    | XM_017004619 | NLRC4 | 4.41E-05    | CDS  |
| hsa-miR-7978    | XM_017004619 | NLRC4 | 2.19E-05    | 5UTR |
| hsa-miR-8052    | XM_017004619 | NLRC4 | 0.000189447 | CDS  |
| hsa-miR-8053    | XM_017004619 | NLRC4 | 0.000169986 | CDS  |
| hsa-miR-8054    | XM_017004619 | NLRC4 | 0.1888091   | CDS  |
| hsa-miR-8054    | XM_017004619 | NLRC4 | 0.007995041 | CDS  |
| hsa-miR-8055    | XM_017004619 | NLRC4 | 0.002863565 | CDS  |
| hsa-miR-8056    | XM_017004619 | NLRC4 | 2.74E-05    | CDS  |
| hsa-miR-8057    | XM_017004619 | NLRC4 | 0.000671559 | CDS  |
| hsa-miR-8057    | XM_017004619 | NLRC4 | 4.61E-07    | CDS  |
| hsa-miR-8058    | XM_017004619 | NLRC4 | 0.000228869 | CDS  |
| hsa-miR-8060    | XM_017004619 | NLRC4 | 0.00095499  | CDS  |
| hsa-miR-8060    | XM_017004619 | NLRC4 | 0.000146875 | CDS  |
| hsa-miR-8069    | XM_017004619 | NLRC4 | 0.000771038 | CDS  |
| hsa-miR-8069    | XM_017004619 | NLRC4 | 0.0264118   | CDS  |
| hsa-miR-8071    | XM_017004619 | NLRC4 | 0.000724533 | CDS  |
| hsa-miR-8072    | XM_017004619 | NLRC4 | 0.003824517 | CDS  |
| hsa-miR-8072    | XM_017004619 | NLRC4 | 0.000133333 | CDS  |
| hsa-miR-8074    | XM_017004619 | NLRC4 | 0.01105221  | CDS  |
| hsa-miR-8074    | XM_017004619 | NLRC4 | 1.91E-05    | CDS  |
| hsa-miR-8074    | XM_017004619 | NLRC4 | 1.42E-05    | 5UTR |
| hsa-miR-8075    | XM_017004619 | NLRC4 | 0.000988815 | CDS  |
| hsa-miR-8077    | XM_017004619 | NLRC4 | 0.002226838 | CDS  |
| hsa-miR-8077    | XM_017004619 | NLRC4 | 0.05045639  | CDS  |
| hsa-miR-8078    | XM_017004619 | NLRC4 | 4.03E-05    | CDS  |
| hsa-miR-8078    | XM_017004619 | NLRC4 | 1.60E-06    | CDS  |
| hsa-miR-8079    | XM_017004619 | NLRC4 | 0.002221194 | CDS  |
| hsa-miR-8079    | XM_017004619 | NLRC4 | 0.000645022 | 3UTR |
| hsa-miR-8079    | XM_017004619 | NLRC4 | 0.001836158 | CDS  |
| hsa-miR-8080    | XM_017004619 | NLRC4 | 0.005514936 | CDS  |
| hsa-miR-8081    | XM_017004619 | NLRC4 | 0.000630286 | CDS  |
| hsa-miR-8081    | XM_017004619 | NLRC4 | 0.06961787  | CDS  |

|                   |              |       |             |      |
|-------------------|--------------|-------|-------------|------|
| hsa-miR-8081      | XM_017004619 | NLRC4 | 0.01195042  | CDS  |
| hsa-miR-8081      | XM_017004619 | NLRC4 | 1.96E-05    | CDS  |
| hsa-miR-8085      | XM_017004619 | NLRC4 | 0.004639071 | CDS  |
| hsa-miR-8085      | XM_017004619 | NLRC4 | 0.01496644  | CDS  |
| hsa-miR-8085      | XM_017004619 | NLRC4 | 0.000642323 | CDS  |
| hsa-miR-8087      | XM_017004619 | NLRC4 | 0.004768539 | CDS  |
| hsa-miR-8088      | XM_017004619 | NLRC4 | 0.01016125  | CDS  |
| hsa-miR-8089      | XM_017004619 | NLRC4 | 8.53E-06    | CDS  |
| hsa-miR-8089      | XM_017004619 | NLRC4 | 0.08241963  | CDS  |
| hsa-miR-8089      | XM_017004619 | NLRC4 | 0.001372911 | CDS  |
| hsa-miR-8089      | XM_017004619 | NLRC4 | 8.80E-06    | CDS  |
| hsa-miR-9500      | XM_017004619 | NLRC4 | 0.001599855 | CDS  |
| hsa-miR-9718      | XM_017004619 | NLRC4 | 0.01275645  | CDS  |
| hsa-miR-9899      | XM_017004619 | NLRC4 | 0.001262872 | CDS  |
| hsa-miR-9899      | XM_017004619 | NLRC4 | 5.90E-06    | CDS  |
| hsa-miR-9901      | XM_017004619 | NLRC4 | 7.08E-06    | CDS  |
| hsa-miR-9901      | XM_017004619 | NLRC4 | 2.67E-05    | 3UTR |
| hsa-miR-9902      | XM_017004619 | NLRC4 | 0.0011826   | CDS  |
| hsa-miR-9902      | XM_017004619 | NLRC4 | 7.08E-06    | CDS  |
| hsa-miR-9903      | XM_017004619 | NLRC4 | 1.88E-05    | CDS  |
| hsa-miR-9985      | XM_017004619 | NLRC4 | 2.13E-05    | CDS  |
| hsa-miR-1843      | XM_017004619 | NLRC4 | 4.35E-05    | CDS  |
| hsa-miR-9986      | XM_017004619 | NLRC4 | 6.17E-06    | CDS  |
| hsa-miR-10226     | XM_017004619 | NLRC4 | 0.000337721 | 3UTR |
| hsa-miR-10392-5p  | XM_017004619 | NLRC4 | 0.006396492 | CDS  |
| hsa-miR-10392-5p  | XM_017004619 | NLRC4 | 0.003599718 | CDS  |
| hsa-miR-10392-5p  | XM_017004619 | NLRC4 | 0.02677736  | CDS  |
| hsa-miR-10392-3p  | XM_017004619 | NLRC4 | 1.12E-05    | CDS  |
| hsa-miR-10394-5p  | XM_017004619 | NLRC4 | 0.007691023 | CDS  |
| hsa-miR-10394-5p  | XM_017004619 | NLRC4 | 4.48E-05    | CDS  |
| hsa-miR-10394-5p  | XM_017004619 | NLRC4 | 1.19E-05    | CDS  |
| hsa-miR-10394-5p  | XM_017004619 | NLRC4 | 0.000260618 | CDS  |
| hsa-miR-10394-3p  | XM_017004619 | NLRC4 | 0.000297589 | CDS  |
| hsa-miR-10395-5p  | XM_017004619 | NLRC4 | 0.004588791 | CDS  |
| hsa-miR-10396a-5p | XM_017004619 | NLRC4 | 1.00E-06    | CDS  |
| hsa-miR-10396a-5p | XM_017004619 | NLRC4 | 0.002444199 | CDS  |
| hsa-miR-10396a-3p | XM_017004619 | NLRC4 | 1.82E-06    | CDS  |
| hsa-miR-10396a-3p | XM_017004619 | NLRC4 | 0.00037471  | CDS  |
| hsa-miR-10397-5p  | XM_017004619 | NLRC4 | 8.38E-06    | CDS  |
| hsa-miR-10398-5p  | XM_017004619 | NLRC4 | 9.16E-05    | CDS  |
| hsa-miR-10398-3p  | XM_017004619 | NLRC4 | 3.15E-05    | 3UTR |
| hsa-miR-10398-3p  | XM_017004619 | NLRC4 | 7.95E-06    | CDS  |
| hsa-miR-10400-5p  | XM_017004619 | NLRC4 | 0.000441636 | CDS  |
| hsa-miR-10400-5p  | XM_017004619 | NLRC4 | 0.003651178 | CDS  |

|                   |              |       |             |      |
|-------------------|--------------|-------|-------------|------|
| hsa-miR-10400-5p  | XM_017004619 | NLRC4 | 0.007721901 | CDS  |
| hsa-miR-10400-3p  | XM_017004619 | NLRC4 | 1.46E-05    | CDS  |
| hsa-miR-10400-3p  | XM_017004619 | NLRC4 | 4.98E-06    | CDS  |
| hsa-miR-10401-5p  | XM_017004619 | NLRC4 | 0.007684299 | CDS  |
| hsa-miR-10401-5p  | XM_017004619 | NLRC4 | 0.000649339 | CDS  |
| hsa-miR-10401-5p  | XM_017004619 | NLRC4 | 6.97E-06    | CDS  |
| hsa-miR-10401-3p  | XM_017004619 | NLRC4 | 0.000107277 | CDS  |
| hsa-miR-10396b-5p | XM_017004619 | NLRC4 | 1.00E-06    | CDS  |
| hsa-miR-10396b-5p | XM_017004619 | NLRC4 | 0.002444199 | CDS  |
| hsa-miR-10396b-3p | XM_017004619 | NLRC4 | 1.82E-06    | CDS  |
| hsa-miR-10522-5p  | XM_017004619 | NLRC4 | 5.89E-05    | 3UTR |
| hsa-miR-10526-3p  | XM_017004619 | NLRC4 | 0.000671559 | CDS  |
| hsa-miR-10526-3p  | XM_017004619 | NLRC4 | 0.003864711 | CDS  |
| hsa-miR-10526-3p  | XM_017004619 | NLRC4 | 0.000598122 | CDS  |
| hsa-miR-11181-5p  | XM_017004619 | NLRC4 | 0.001068663 | CDS  |
| hsa-miR-11181-3p  | XM_017004619 | NLRC4 | 0.05553747  | CDS  |
| hsa-miR-11181-3p  | XM_017004619 | NLRC4 | 0.02185333  | CDS  |
| hsa-miR-11399     | XM_017004619 | NLRC4 | 0.007047336 | CDS  |
| hsa-miR-11399     | XM_017004619 | NLRC4 | 0.01095107  | CDS  |
| hsa-miR-11400     | XM_017004619 | NLRC4 | 0.01626591  | CDS  |
| hsa-miR-3059-5p   | XM_017004619 | NLRC4 | 0.000369226 | 3UTR |
| hsa-miR-3059-3p   | XM_017004619 | NLRC4 | 0.001495183 | CDS  |
| hsa-miR-3085-5p   | XM_017004619 | NLRC4 | 1.28E-06    | CDS  |
| hsa-miR-3085-5p   | XM_017004619 | NLRC4 | 0.000608953 | CDS  |
| hsa-miR-3085-3p   | XM_017004619 | NLRC4 | 0.007691023 | CDS  |
| hsa-miR-3085-3p   | XM_017004619 | NLRC4 | 2.19E-05    | 5UTR |
| hsa-miR-6529-5p   | XM_017004619 | NLRC4 | 4.59E-05    | CDS  |
| hsa-miR-6529-3p   | XM_017004619 | NLRC4 | 3.92E-05    | CDS  |
| hsa-miR-6529-3p   | XM_017004619 | NLRC4 | 7.91E-05    | CDS  |
| hsa-miR-9851-5p   | XM_017004619 | NLRC4 | 0.000378314 | CDS  |
| hsa-miR-9851-5p   | XM_017004619 | NLRC4 | 0.002488019 | CDS  |
| hsa-miR-9851-5p   | XM_017004619 | NLRC4 | 4.19E-05    | CDS  |
| hsa-miR-9851-3p   | XM_017004619 | NLRC4 | 6.98E-06    | CDS  |
| hsa-miR-9851-3p   | XM_017004619 | NLRC4 | 2.27E-05    | CDS  |
| hsa-miR-12118     | XM_017004619 | NLRC4 | 0.002757107 | CDS  |
| hsa-miR-12119     | XM_017004619 | NLRC4 | 0.02352991  | CDS  |
| hsa-miR-12119     | XM_017004619 | NLRC4 | 0.01000834  | CDS  |
| hsa-miR-12120     | XM_017004619 | NLRC4 | 1.91E-05    | CDS  |
| hsa-miR-12121     | XM_017004619 | NLRC4 | 1.92E-05    | CDS  |
| hsa-miR-12122     | XM_017004619 | NLRC4 | 0.005103181 | CDS  |
| hsa-miR-12122     | XM_017004619 | NLRC4 | 3.50E-05    | CDS  |
| hsa-miR-12124     | XM_017004619 | NLRC4 | 0.003385126 | CDS  |
| hsa-miR-12124     | XM_017004619 | NLRC4 | 0.000598122 | CDS  |
| hsa-miR-12124     | XM_017004619 | NLRC4 | 0.001239845 | CDS  |



|                  |              |       |             |      |
|------------------|--------------|-------|-------------|------|
| hsa-miR-12125    | XM_017004619 | NLRC4 | 0.000106281 | CDS  |
| hsa-miR-12126    | XM_017004619 | NLRC4 | 0.000107556 | 5UTR |
| hsa-miR-12126    | XM_017004619 | NLRC4 | 0.000136559 | CDS  |
| hsa-miR-12126    | XM_017004619 | NLRC4 | 1.42E-05    | 5UTR |
| hsa-miR-12127    | XM_017004619 | NLRC4 | 0.000432941 | CDS  |
| hsa-miR-12127    | XM_017004619 | NLRC4 | 0.01367002  | CDS  |
| hsa-miR-12128    | XM_017004619 | NLRC4 | 0.001394641 | CDS  |
| hsa-miR-12128    | XM_017004619 | NLRC4 | 2.67E-06    | CDS  |
| hsa-miR-12129    | XM_017004619 | NLRC4 | 0.1025644   | CDS  |
| hsa-miR-12131    | XM_017004619 | NLRC4 | 0.001218159 | CDS  |
| hsa-miR-12131    | XM_017004619 | NLRC4 | 0.00101605  | 5UTR |
| hsa-let-7a-5p    | NM_021209    | NLRC4 | 0.00237631  | CDS  |
| hsa-let-7b-5p    | NM_021209    | NLRC4 | 0.00237631  | CDS  |
| hsa-let-7b-5p    | NM_021209    | NLRC4 | 0.000133333 | CDS  |
| hsa-let-7c-5p    | NM_021209    | NLRC4 | 0.00237631  | CDS  |
| hsa-let-7c-3p    | NM_021209    | NLRC4 | 9.41E-05    | CDS  |
| hsa-let-7d-5p    | NM_021209    | NLRC4 | 0.00237631  | CDS  |
| hsa-let-7d-5p    | NM_021209    | NLRC4 | 0.005727952 | 5UTR |
| hsa-let-7e-5p    | NM_021209    | NLRC4 | 2.55E-05    | CDS  |
| hsa-miR-15a-5p   | NM_021209    | NLRC4 | 0.000338269 | CDS  |
| hsa-miR-15a-3p   | NM_021209    | NLRC4 | 7.08E-06    | CDS  |
| hsa-miR-17-3p    | NM_021209    | NLRC4 | 0.001752888 | CDS  |
| hsa-miR-17-3p    | NM_021209    | NLRC4 | 0.01064963  | CDS  |
| hsa-miR-18a-5p   | NM_021209    | NLRC4 | 0.01680466  | 5UTR |
| hsa-miR-18a-3p   | NM_021209    | NLRC4 | 0.006075034 | CDS  |
| hsa-miR-18a-3p   | NM_021209    | NLRC4 | 0.000583201 | CDS  |
| hsa-miR-19b-1-5p | NM_021209    | NLRC4 | 0.002426029 | CDS  |
| hsa-miR-19b-2-5p | NM_021209    | NLRC4 | 0.00033047  | CDS  |
| hsa-miR-21-5p    | NM_021209    | NLRC4 | 0.05139873  | CDS  |
| hsa-miR-21-3p    | NM_021209    | NLRC4 | 0.02183851  | CDS  |
| hsa-miR-22-5p    | NM_021209    | NLRC4 | 0.008149687 | CDS  |
| hsa-miR-22-5p    | NM_021209    | NLRC4 | 0.001206662 | CDS  |
| hsa-miR-22-3p    | NM_021209    | NLRC4 | 0.000535464 | CDS  |
| hsa-miR-23a-5p   | NM_021209    | NLRC4 | 4.59E-05    | CDS  |
| hsa-miR-23a-5p   | NM_021209    | NLRC4 | 0.01095107  | CDS  |
| hsa-miR-23a-5p   | NM_021209    | NLRC4 | 7.19E-05    | CDS  |
| hsa-miR-23a-5p   | NM_021209    | NLRC4 | 0.000671559 | CDS  |
| hsa-miR-23a-3p   | NM_021209    | NLRC4 | 4.02E-07    | CDS  |
| hsa-miR-23a-3p   | NM_021209    | NLRC4 | 0.006950725 | CDS  |
| hsa-miR-23a-3p   | NM_021209    | NLRC4 | 4.78E-05    | 5UTR |
| hsa-miR-24-3p    | NM_021209    | NLRC4 | 4.24E-05    | CDS  |
| hsa-miR-24-3p    | NM_021209    | NLRC4 | 0.01083776  | 5UTR |
| hsa-miR-25-5p    | NM_021209    | NLRC4 | 0.002521103 | CDS  |
| hsa-miR-25-3p    | NM_021209    | NLRC4 | 0.000998661 | CDS  |

|                   |           |       |             |      |
|-------------------|-----------|-------|-------------|------|
| hsa-miR-26a-5p    | NM_021209 | NLRC4 | 0.02111429  | CDS  |
| hsa-miR-26a-1-3p  | NM_021209 | NLRC4 | 0.000259323 | CDS  |
| hsa-miR-26b-3p    | NM_021209 | NLRC4 | 0.000381964 | CDS  |
| hsa-miR-26b-3p    | NM_021209 | NLRC4 | 0.00042543  | CDS  |
| hsa-miR-27a-5p    | NM_021209 | NLRC4 | 0.000121209 | CDS  |
| hsa-miR-27a-5p    | NM_021209 | NLRC4 | 9.02E-05    | CDS  |
| hsa-miR-27a-5p    | NM_021209 | NLRC4 | 5.47E-06    | CDS  |
| hsa-miR-27a-3p    | NM_021209 | NLRC4 | 2.13E-05    | CDS  |
| hsa-miR-28-5p     | NM_021209 | NLRC4 | 0.000268963 | CDS  |
| hsa-miR-28-3p     | NM_021209 | NLRC4 | 0.03211739  | CDS  |
| hsa-miR-30a-3p    | NM_021209 | NLRC4 | 2.96E-05    | CDS  |
| hsa-miR-30a-3p    | NM_021209 | NLRC4 | 0.008037838 | 5UTR |
| hsa-miR-31-3p     | NM_021209 | NLRC4 | 2.83E-05    | CDS  |
| hsa-miR-31-3p     | NM_021209 | NLRC4 | 0.000196593 | CDS  |
| hsa-miR-32-3p     | NM_021209 | NLRC4 | 0.003941034 | CDS  |
| hsa-miR-33a-3p    | NM_021209 | NLRC4 | 0.000787757 | CDS  |
| hsa-miR-92a-1-5p  | NM_021209 | NLRC4 | 0.001447161 | CDS  |
| hsa-miR-92a-3p    | NM_021209 | NLRC4 | 9.46E-05    | CDS  |
| hsa-miR-92a-2-5p  | NM_021209 | NLRC4 | 3.15E-05    | CDS  |
| hsa-miR-92a-2-5p  | NM_021209 | NLRC4 | 0.01408661  | CDS  |
| hsa-miR-93-3p     | NM_021209 | NLRC4 | 0.000491166 | CDS  |
| hsa-miR-96-5p     | NM_021209 | NLRC4 | 2.27E-05    | CDS  |
| hsa-miR-99a-3p    | NM_021209 | NLRC4 | 0.0074165   | CDS  |
| hsa-miR-101-5p    | NM_021209 | NLRC4 | 0.000170659 | CDS  |
| hsa-miR-29b-1-5p  | NM_021209 | NLRC4 | 0.003088161 | CDS  |
| hsa-miR-29b-2-5p  | NM_021209 | NLRC4 | 3.76E-05    | CDS  |
| hsa-miR-29b-2-5p  | NM_021209 | NLRC4 | 0.000618871 | CDS  |
| hsa-miR-103a-2-5p | NM_021209 | NLRC4 | 0.004422789 | CDS  |
| hsa-miR-103a-3p   | NM_021209 | NLRC4 | 4.61E-07    | CDS  |
| hsa-miR-103a-3p   | NM_021209 | NLRC4 | 0.001687649 | 5UTR |
| hsa-miR-103a-1-5p | NM_021209 | NLRC4 | 5.14E-05    | CDS  |
| hsa-miR-105-3p    | NM_021209 | NLRC4 | 0.000855203 | CDS  |
| hsa-miR-105-3p    | NM_021209 | NLRC4 | 0.00132712  | CDS  |
| hsa-miR-106a-3p   | NM_021209 | NLRC4 | 0.000157089 | CDS  |
| hsa-miR-107       | NM_021209 | NLRC4 | 1.33E-07    | CDS  |
| hsa-miR-192-3p    | NM_021209 | NLRC4 | 6.06E-05    | CDS  |
| hsa-miR-197-5p    | NM_021209 | NLRC4 | 3.41E-07    | CDS  |
| hsa-miR-197-5p    | NM_021209 | NLRC4 | 0.002810449 | CDS  |
| hsa-miR-197-5p    | NM_021209 | NLRC4 | 0.000605168 | CDS  |
| hsa-miR-197-3p    | NM_021209 | NLRC4 | 5.87E-05    | CDS  |
| hsa-miR-198       | NM_021209 | NLRC4 | 0.02559255  | 5UTR |
| hsa-miR-198       | NM_021209 | NLRC4 | 0.02831089  | CDS  |
| hsa-miR-199a-5p   | NM_021209 | NLRC4 | 3.03E-05    | CDS  |
| hsa-miR-199a-3p   | NM_021209 | NLRC4 | 1.33E-07    | CDS  |

|                   |           |       |             |      |
|-------------------|-----------|-------|-------------|------|
| hsa-miR-208a-5p   | NM_021209 | NLRC4 | 2.55E-05    | CDS  |
| hsa-miR-208a-5p   | NM_021209 | NLRC4 | 0.02663835  | CDS  |
| hsa-miR-129-5p    | NM_021209 | NLRC4 | 0.01566064  | CDS  |
| hsa-miR-148a-5p   | NM_021209 | NLRC4 | 0.000837869 | CDS  |
| hsa-miR-30c-2-3p  | NM_021209 | NLRC4 | 0.001886311 | 5UTR |
| hsa-miR-30c-2-3p  | NM_021209 | NLRC4 | 0.00210636  | CDS  |
| hsa-miR-30c-2-3p  | NM_021209 | NLRC4 | 0.000592353 | CDS  |
| hsa-miR-30c-2-3p  | NM_021209 | NLRC4 | 0.000135949 | CDS  |
| hsa-miR-30d-3p    | NM_021209 | NLRC4 | 0.002758134 | 5UTR |
| hsa-miR-30d-3p    | NM_021209 | NLRC4 | 0.003803932 | CDS  |
| hsa-miR-139-5p    | NM_021209 | NLRC4 | 0.00874274  | CDS  |
| hsa-miR-139-3p    | NM_021209 | NLRC4 | 0.000123213 | CDS  |
| hsa-miR-139-3p    | NM_021209 | NLRC4 | 2.66E-05    | 5UTR |
| hsa-miR-10a-5p    | NM_021209 | NLRC4 | 1.88E-05    | CDS  |
| hsa-miR-10b-5p    | NM_021209 | NLRC4 | 0.001410534 | CDS  |
| hsa-miR-10b-3p    | NM_021209 | NLRC4 | 0.000435946 | CDS  |
| hsa-miR-10b-3p    | NM_021209 | NLRC4 | 0.000163163 | 5UTR |
| hsa-miR-181a-5p   | NM_021209 | NLRC4 | 7.76E-05    | CDS  |
| hsa-miR-181a-5p   | NM_021209 | NLRC4 | 0.006729548 | CDS  |
| hsa-miR-181a-2-3p | NM_021209 | NLRC4 | 9.15E-06    | 5UTR |
| hsa-miR-181b-5p   | NM_021209 | NLRC4 | 0.006729548 | CDS  |
| hsa-miR-181b-5p   | NM_021209 | NLRC4 | 7.76E-05    | CDS  |
| hsa-miR-181b-5p   | NM_021209 | NLRC4 | 0.01472671  | CDS  |
| hsa-miR-181c-5p   | NM_021209 | NLRC4 | 0.006729548 | CDS  |
| hsa-miR-181c-5p   | NM_021209 | NLRC4 | 7.76E-05    | CDS  |
| hsa-miR-182-5p    | NM_021209 | NLRC4 | 0.000553642 | 5UTR |
| hsa-miR-187-5p    | NM_021209 | NLRC4 | 7.51E-05    | CDS  |
| hsa-miR-187-3p    | NM_021209 | NLRC4 | 0.000115647 | CDS  |
| hsa-miR-187-3p    | NM_021209 | NLRC4 | 0.000757346 | CDS  |
| hsa-miR-199b-5p   | NM_021209 | NLRC4 | 3.03E-05    | CDS  |
| hsa-miR-199b-3p   | NM_021209 | NLRC4 | 1.33E-07    | CDS  |
| hsa-miR-203a-5p   | NM_021209 | NLRC4 | 0.002346565 | CDS  |
| hsa-miR-204-5p    | NM_021209 | NLRC4 | 0.000199878 | CDS  |
| hsa-miR-204-3p    | NM_021209 | NLRC4 | 0.001018132 | 5UTR |
| hsa-miR-205-5p    | NM_021209 | NLRC4 | 6.20E-07    | CDS  |
| hsa-miR-205-5p    | NM_021209 | NLRC4 | 0.0561252   | 5UTR |
| hsa-miR-205-5p    | NM_021209 | NLRC4 | 0.00027781  | CDS  |
| hsa-miR-205-5p    | NM_021209 | NLRC4 | 1.34E-05    | 5UTR |
| hsa-miR-205-3p    | NM_021209 | NLRC4 | 0.04157089  | CDS  |
| hsa-miR-205-3p    | NM_021209 | NLRC4 | 0.001498968 | CDS  |
| hsa-miR-210-5p    | NM_021209 | NLRC4 | 6.58E-06    | CDS  |
| hsa-miR-210-5p    | NM_021209 | NLRC4 | 2.13E-05    | CDS  |
| hsa-miR-210-3p    | NM_021209 | NLRC4 | 1.85E-06    | CDS  |
| hsa-miR-210-3p    | NM_021209 | NLRC4 | 7.71E-05    | CDS  |

|                   |           |       |             |      |
|-------------------|-----------|-------|-------------|------|
| hsa-miR-211-5p    | NM_021209 | NLRC4 | 0.000719145 | CDS  |
| hsa-miR-211-5p    | NM_021209 | NLRC4 | 0.000199878 | CDS  |
| hsa-miR-211-5p    | NM_021209 | NLRC4 | 0.01223285  | CDS  |
| hsa-miR-211-3p    | NM_021209 | NLRC4 | 6.00E-06    | CDS  |
| hsa-miR-212-5p    | NM_021209 | NLRC4 | 0.000443412 | CDS  |
| hsa-miR-212-3p    | NM_021209 | NLRC4 | 5.23E-05    | CDS  |
| hsa-miR-212-3p    | NM_021209 | NLRC4 | 0.00110755  | CDS  |
| hsa-miR-212-3p    | NM_021209 | NLRC4 | 0.002426029 | CDS  |
| hsa-miR-181a-3p   | NM_021209 | NLRC4 | 9.15E-06    | 5UTR |
| hsa-miR-214-5p    | NM_021209 | NLRC4 | 0.000164624 | CDS  |
| hsa-miR-214-5p    | NM_021209 | NLRC4 | 0.000923374 | CDS  |
| hsa-miR-214-3p    | NM_021209 | NLRC4 | 6.94E-05    | CDS  |
| hsa-miR-214-3p    | NM_021209 | NLRC4 | 6.67E-05    | CDS  |
| hsa-miR-215-3p    | NM_021209 | NLRC4 | 0.01223285  | CDS  |
| hsa-miR-215-3p    | NM_021209 | NLRC4 | 0.000552817 | CDS  |
| hsa-miR-216a-3p   | NM_021209 | NLRC4 | 3.42E-07    | CDS  |
| hsa-miR-216a-3p   | NM_021209 | NLRC4 | 0.02825249  | CDS  |
| hsa-miR-216a-3p   | NM_021209 | NLRC4 | 0.002587252 | 5UTR |
| hsa-miR-217-5p    | NM_021209 | NLRC4 | 9.39E-05    | CDS  |
| hsa-miR-218-1-3p  | NM_021209 | NLRC4 | 0.005266164 | CDS  |
| hsa-miR-218-2-3p  | NM_021209 | NLRC4 | 0.000842272 | CDS  |
| hsa-miR-218-2-3p  | NM_021209 | NLRC4 | 6.24E-05    | CDS  |
| hsa-miR-219a-1-3p | NM_021209 | NLRC4 | 0.000926972 | CDS  |
| hsa-miR-219a-1-3p | NM_021209 | NLRC4 | 0.002226838 | CDS  |
| hsa-miR-221-3p    | NM_021209 | NLRC4 | 7.69E-06    | CDS  |
| hsa-miR-221-3p    | NM_021209 | NLRC4 | 0.001225395 | CDS  |
| hsa-miR-221-3p    | NM_021209 | NLRC4 | 0.000137416 | CDS  |
| hsa-miR-221-3p    | NM_021209 | NLRC4 | 0.000281735 | CDS  |
| hsa-miR-222-5p    | NM_021209 | NLRC4 | 4.44E-07    | CDS  |
| hsa-miR-222-3p    | NM_021209 | NLRC4 | 0.003752472 | CDS  |
| hsa-miR-223-3p    | NM_021209 | NLRC4 | 0.02274983  | CDS  |
| hsa-miR-224-5p    | NM_021209 | NLRC4 | 0.000604901 | 5UTR |
| hsa-miR-224-5p    | NM_021209 | NLRC4 | 0.006498872 | CDS  |
| hsa-miR-200b-5p   | NM_021209 | NLRC4 | 2.82E-07    | CDS  |
| hsa-miR-200b-5p   | NM_021209 | NLRC4 | 0.1399983   | CDS  |
| hsa-miR-200b-3p   | NM_021209 | NLRC4 | 0.03757485  | CDS  |
| hsa-let-7g-3p     | NM_021209 | NLRC4 | 6.75E-07    | CDS  |
| hsa-let-7g-3p     | NM_021209 | NLRC4 | 2.96E-05    | CDS  |
| hsa-let-7i-5p     | NM_021209 | NLRC4 | 0.00750087  | CDS  |
| hsa-let-7i-3p     | NM_021209 | NLRC4 | 8.94E-05    | CDS  |
| hsa-let-7i-3p     | NM_021209 | NLRC4 | 0.000324004 | CDS  |
| hsa-miR-15b-5p    | NM_021209 | NLRC4 | 7.72E-06    | CDS  |
| hsa-miR-15b-5p    | NM_021209 | NLRC4 | 0.000730261 | 5UTR |
| hsa-miR-15b-3p    | NM_021209 | NLRC4 | 0.05384545  | CDS  |

|                   |           |       |             |      |
|-------------------|-----------|-------|-------------|------|
| hsa-miR-23b-5p    | NM_021209 | NLRC4 | 0.008415762 | CDS  |
| hsa-miR-23b-5p    | NM_021209 | NLRC4 | 0.000859196 | CDS  |
| hsa-miR-23b-5p    | NM_021209 | NLRC4 | 5.54E-06    | CDS  |
| hsa-miR-23b-3p    | NM_021209 | NLRC4 | 0.0318968   | 5UTR |
| hsa-miR-23b-3p    | NM_021209 | NLRC4 | 4.02E-07    | CDS  |
| hsa-miR-27b-5p    | NM_021209 | NLRC4 | 0.000248086 | CDS  |
| hsa-miR-27b-3p    | NM_021209 | NLRC4 | 2.13E-05    | CDS  |
| hsa-miR-30b-3p    | NM_021209 | NLRC4 | 0.000441884 | CDS  |
| hsa-miR-30b-3p    | NM_021209 | NLRC4 | 0.08241963  | CDS  |
| hsa-miR-122-5p    | NM_021209 | NLRC4 | 4.95E-07    | CDS  |
| hsa-miR-124-5p    | NM_021209 | NLRC4 | 0.001114676 | CDS  |
| hsa-miR-124-5p    | NM_021209 | NLRC4 | 0.000787757 | CDS  |
| hsa-miR-124-3p    | NM_021209 | NLRC4 | 0.01680466  | 5UTR |
| hsa-miR-124-3p    | NM_021209 | NLRC4 | 0.001897022 | CDS  |
| hsa-miR-125b-1-3p | NM_021209 | NLRC4 | 5.44E-05    | 5UTR |
| hsa-miR-125b-1-3p | NM_021209 | NLRC4 | 3.99E-05    | CDS  |
| hsa-miR-125b-1-3p | NM_021209 | NLRC4 | 9.25E-07    | CDS  |
| hsa-miR-128-1-5p  | NM_021209 | NLRC4 | 0.001727314 | CDS  |
| hsa-miR-128-1-5p  | NM_021209 | NLRC4 | 1.86E-05    | CDS  |
| hsa-miR-128-1-5p  | NM_021209 | NLRC4 | 6.65E-06    | CDS  |
| hsa-miR-128-3p    | NM_021209 | NLRC4 | 3.42E-07    | CDS  |
| hsa-miR-128-3p    | NM_021209 | NLRC4 | 9.39E-05    | CDS  |
| hsa-miR-130a-5p   | NM_021209 | NLRC4 | 0.0379225   | CDS  |
| hsa-miR-133a-3p   | NM_021209 | NLRC4 | 0.000174148 | 5UTR |
| hsa-miR-135a-5p   | NM_021209 | NLRC4 | 0.07413136  | 5UTR |
| hsa-miR-135a-5p   | NM_021209 | NLRC4 | 0.000772438 | CDS  |
| hsa-miR-135a-3p   | NM_021209 | NLRC4 | 5.90E-05    | CDS  |
| hsa-miR-135a-2-3p | NM_021209 | NLRC4 | 0.00232753  | CDS  |
| hsa-miR-135a-2-3p | NM_021209 | NLRC4 | 0.01000834  | CDS  |
| hsa-miR-137-5p    | NM_021209 | NLRC4 | 0.001170791 | CDS  |
| hsa-miR-137-5p    | NM_021209 | NLRC4 | 0.1188673   | CDS  |
| hsa-miR-137-3p    | NM_021209 | NLRC4 | 0.01085972  | CDS  |
| hsa-miR-138-5p    | NM_021209 | NLRC4 | 3.23E-06    | CDS  |
| hsa-miR-138-5p    | NM_021209 | NLRC4 | 7.76E-05    | CDS  |
| hsa-miR-138-5p    | NM_021209 | NLRC4 | 0.004879862 | CDS  |
| hsa-miR-140-5p    | NM_021209 | NLRC4 | 0.001114676 | CDS  |
| hsa-miR-140-5p    | NM_021209 | NLRC4 | 5.59E-05    | CDS  |
| hsa-miR-140-3p    | NM_021209 | NLRC4 | 0.01337743  | 5UTR |
| hsa-miR-142-3p    | NM_021209 | NLRC4 | 0.009171114 | CDS  |
| hsa-miR-142-3p    | NM_021209 | NLRC4 | 0.000596955 | 5UTR |
| hsa-miR-143-5p    | NM_021209 | NLRC4 | 4.42E-05    | CDS  |
| hsa-miR-143-5p    | NM_021209 | NLRC4 | 0.000216501 | CDS  |
| hsa-miR-143-5p    | NM_021209 | NLRC4 | 0.002444199 | CDS  |
| hsa-miR-143-3p    | NM_021209 | NLRC4 | 0.00170134  | CDS  |

|                   |           |       |             |      |
|-------------------|-----------|-------|-------------|------|
| hsa-miR-143-3p    | NM_021209 | NLRC4 | 0.000169476 | CDS  |
| hsa-miR-145-5p    | NM_021209 | NLRC4 | 4.03E-05    | CDS  |
| hsa-miR-145-5p    | NM_021209 | NLRC4 | 2.42E-06    | CDS  |
| hsa-miR-145-3p    | NM_021209 | NLRC4 | 0.04013073  | CDS  |
| hsa-miR-152-5p    | NM_021209 | NLRC4 | 0.000837869 | CDS  |
| hsa-miR-152-5p    | NM_021209 | NLRC4 | 0.006198772 | CDS  |
| hsa-miR-153-3p    | NM_021209 | NLRC4 | 6.16E-05    | CDS  |
| hsa-miR-191-5p    | NM_021209 | NLRC4 | 0.004907097 | CDS  |
| hsa-miR-191-3p    | NM_021209 | NLRC4 | 7.49E-05    | CDS  |
| hsa-miR-191-3p    | NM_021209 | NLRC4 | 0.1076955   | CDS  |
| hsa-miR-191-3p    | NM_021209 | NLRC4 | 0.0101559   | CDS  |
| hsa-miR-9-5p      | NM_021209 | NLRC4 | 0.008738688 | CDS  |
| hsa-miR-9-5p      | NM_021209 | NLRC4 | 0.000535268 | CDS  |
| hsa-miR-9-5p      | NM_021209 | NLRC4 | 0.001384617 | CDS  |
| hsa-miR-125a-5p   | NM_021209 | NLRC4 | 0.05124352  | CDS  |
| hsa-miR-125a-3p   | NM_021209 | NLRC4 | 9.25E-07    | CDS  |
| hsa-miR-125a-3p   | NM_021209 | NLRC4 | 3.16E-06    | CDS  |
| hsa-miR-125b-2-3p | NM_021209 | NLRC4 | 3.99E-05    | CDS  |
| hsa-miR-125b-2-3p | NM_021209 | NLRC4 | 0.005072645 | CDS  |
| hsa-miR-126-3p    | NM_021209 | NLRC4 | 0.002564212 | CDS  |
| hsa-miR-127-5p    | NM_021209 | NLRC4 | 0.000111626 | 5UTR |
| hsa-miR-127-5p    | NM_021209 | NLRC4 | 1.12E-05    | CDS  |
| hsa-miR-127-5p    | NM_021209 | NLRC4 | 0.001481713 | CDS  |
| hsa-miR-127-3p    | NM_021209 | NLRC4 | 8.56E-06    | CDS  |
| hsa-miR-127-3p    | NM_021209 | NLRC4 | 0.000905808 | CDS  |
| hsa-miR-129-2-3p  | NM_021209 | NLRC4 | 2.98E-05    | CDS  |
| hsa-miR-134-3p    | NM_021209 | NLRC4 | 0.000115647 | CDS  |
| hsa-miR-134-3p    | NM_021209 | NLRC4 | 0.000388466 | CDS  |
| hsa-miR-134-3p    | NM_021209 | NLRC4 | 2.96E-05    | CDS  |
| hsa-miR-136-3p    | NM_021209 | NLRC4 | 0.02239456  | CDS  |
| hsa-miR-138-1-3p  | NM_021209 | NLRC4 | 8.97E-06    | CDS  |
| hsa-miR-149-5p    | NM_021209 | NLRC4 | 0.001304349 | CDS  |
| hsa-miR-149-3p    | NM_021209 | NLRC4 | 0.0264118   | CDS  |
| hsa-miR-149-3p    | NM_021209 | NLRC4 | 0.03273842  | CDS  |
| hsa-miR-150-5p    | NM_021209 | NLRC4 | 0.000268253 | CDS  |
| hsa-miR-150-3p    | NM_021209 | NLRC4 | 0.000216501 | CDS  |
| hsa-miR-150-3p    | NM_021209 | NLRC4 | 0.002208114 | CDS  |
| hsa-miR-150-3p    | NM_021209 | NLRC4 | 4.96E-05    | CDS  |
| hsa-miR-154-5p    | NM_021209 | NLRC4 | 0.000707503 | CDS  |
| hsa-miR-154-5p    | NM_021209 | NLRC4 | 0.01861651  | CDS  |
| hsa-miR-154-5p    | NM_021209 | NLRC4 | 7.08E-06    | CDS  |
| hsa-miR-184       | NM_021209 | NLRC4 | 0.002521103 | CDS  |
| hsa-miR-185-5p    | NM_021209 | NLRC4 | 0.007362526 | CDS  |
| hsa-miR-185-3p    | NM_021209 | NLRC4 | 0.000189447 | CDS  |

|                   |           |       |             |      |
|-------------------|-----------|-------|-------------|------|
| hsa-miR-185-3p    | NM_021209 | NLRC4 | 3.68E-05    | CDS  |
| hsa-miR-186-5p    | NM_021209 | NLRC4 | 0.001054134 | CDS  |
| hsa-miR-188-5p    | NM_021209 | NLRC4 | 0.002217478 | CDS  |
| hsa-miR-188-5p    | NM_021209 | NLRC4 | 0.00027781  | CDS  |
| hsa-miR-188-3p    | NM_021209 | NLRC4 | 4.78E-05    | 5UTR |
| hsa-miR-188-3p    | NM_021209 | NLRC4 | 2.98E-05    | CDS  |
| hsa-miR-193a-5p   | NM_021209 | NLRC4 | 0.000297589 | CDS  |
| hsa-miR-193a-5p   | NM_021209 | NLRC4 | 0.00016652  | CDS  |
| hsa-miR-193a-3p   | NM_021209 | NLRC4 | 9.61E-05    | CDS  |
| hsa-miR-194-5p    | NM_021209 | NLRC4 | 0.000972019 | CDS  |
| hsa-miR-194-5p    | NM_021209 | NLRC4 | 0.000542025 | CDS  |
| hsa-miR-195-3p    | NM_021209 | NLRC4 | 0.002536929 | CDS  |
| hsa-miR-195-3p    | NM_021209 | NLRC4 | 0.001503355 | CDS  |
| hsa-miR-195-3p    | NM_021209 | NLRC4 | 0.02013325  | 5UTR |
| hsa-miR-320a-5p   | NM_021209 | NLRC4 | 0.000447996 | CDS  |
| hsa-miR-320a-5p   | NM_021209 | NLRC4 | 6.96E-05    | CDS  |
| hsa-miR-320a-3p   | NM_021209 | NLRC4 | 0.001567866 | CDS  |
| hsa-miR-320a-3p   | NM_021209 | NLRC4 | 0.01442079  | 5UTR |
| hsa-miR-200c-5p   | NM_021209 | NLRC4 | 1.12E-05    | CDS  |
| hsa-miR-200c-5p   | NM_021209 | NLRC4 | 0.06641009  | CDS  |
| hsa-miR-1-5p      | NM_021209 | NLRC4 | 0.01318848  | CDS  |
| hsa-miR-155-3p    | NM_021209 | NLRC4 | 2.98E-05    | CDS  |
| hsa-miR-128-2-5p  | NM_021209 | NLRC4 | 0.003651178 | CDS  |
| hsa-miR-194-3p    | NM_021209 | NLRC4 | 1.46E-05    | CDS  |
| hsa-miR-194-3p    | NM_021209 | NLRC4 | 0.00216149  | CDS  |
| hsa-miR-106b-3p   | NM_021209 | NLRC4 | 6.05E-07    | CDS  |
| hsa-miR-106b-3p   | NM_021209 | NLRC4 | 1.12E-05    | CDS  |
| hsa-miR-106b-3p   | NM_021209 | NLRC4 | 0.002488019 | CDS  |
| hsa-miR-30c-1-3p  | NM_021209 | NLRC4 | 0.003230363 | 5UTR |
| hsa-miR-302a-5p   | NM_021209 | NLRC4 | 0.2170907   | CDS  |
| hsa-miR-302a-3p   | NM_021209 | NLRC4 | 2.88E-05    | CDS  |
| hsa-miR-302a-3p   | NM_021209 | NLRC4 | 0.002346565 | CDS  |
| hsa-miR-302a-3p   | NM_021209 | NLRC4 | 0.000963264 | CDS  |
| hsa-miR-219a-2-3p | NM_021209 | NLRC4 | 0.00069606  | CDS  |
| hsa-miR-34b-3p    | NM_021209 | NLRC4 | 0.000319363 | 5UTR |
| hsa-miR-34c-5p    | NM_021209 | NLRC4 | 0.004462303 | CDS  |
| hsa-miR-299-3p    | NM_021209 | NLRC4 | 0.001897022 | CDS  |
| hsa-miR-99b-3p    | NM_021209 | NLRC4 | 0.0532159   | CDS  |
| hsa-miR-99b-3p    | NM_021209 | NLRC4 | 0.000230589 | CDS  |
| hsa-miR-296-3p    | NM_021209 | NLRC4 | 0.09012369  | CDS  |
| hsa-miR-296-3p    | NM_021209 | NLRC4 | 0.000598122 | CDS  |
| hsa-miR-296-3p    | NM_021209 | NLRC4 | 0.000262096 | 5UTR |
| hsa-miR-130b-5p   | NM_021209 | NLRC4 | 0.07413136  | 5UTR |
| hsa-miR-130b-5p   | NM_021209 | NLRC4 | 1.82E-06    | CDS  |

|                 |           |       |             |      |
|-----------------|-----------|-------|-------------|------|
| hsa-miR-130b-3p | NM_021209 | NLRC4 | 0.000435946 | CDS  |
| hsa-miR-30e-3p  | NM_021209 | NLRC4 | 0.002758134 | 5UTR |
| hsa-miR-361-5p  | NM_021209 | NLRC4 | 0.000915739 | 5UTR |
| hsa-miR-361-3p  | NM_021209 | NLRC4 | 0.001157739 | CDS  |
| hsa-miR-361-3p  | NM_021209 | NLRC4 | 1.46E-05    | CDS  |
| hsa-miR-363-5p  | NM_021209 | NLRC4 | 0.003344924 | CDS  |
| hsa-miR-365a-5p | NM_021209 | NLRC4 | 0.003328804 | 5UTR |
| hsa-miR-365a-5p | NM_021209 | NLRC4 | 0.000207579 | CDS  |
| hsa-miR-365b-5p | NM_021209 | NLRC4 | 0.001447161 | CDS  |
| hsa-miR-365b-5p | NM_021209 | NLRC4 | 0.0264118   | CDS  |
| hsa-miR-365b-5p | NM_021209 | NLRC4 | 0.00303577  | CDS  |
| hsa-miR-302c-5p | NM_021209 | NLRC4 | 0.000121323 | 5UTR |
| hsa-miR-302d-5p | NM_021209 | NLRC4 | 0.01940061  | CDS  |
| hsa-miR-376c-5p | NM_021209 | NLRC4 | 0.01718499  | CDS  |
| hsa-miR-369-5p  | NM_021209 | NLRC4 | 0.06684233  | CDS  |
| hsa-miR-370-5p  | NM_021209 | NLRC4 | 6.66E-06    | CDS  |
| hsa-miR-370-5p  | NM_021209 | NLRC4 | 6.24E-05    | CDS  |
| hsa-miR-370-3p  | NM_021209 | NLRC4 | 0.000649339 | CDS  |
| hsa-miR-371a-5p | NM_021209 | NLRC4 | 8.76E-06    | 5UTR |
| hsa-miR-371a-5p | NM_021209 | NLRC4 | 0.000385323 | CDS  |
| hsa-miR-371a-5p | NM_021209 | NLRC4 | 0.000104356 | CDS  |
| hsa-miR-371a-3p | NM_021209 | NLRC4 | 2.88E-05    | CDS  |
| hsa-miR-372-5p  | NM_021209 | NLRC4 | 0.000265951 | CDS  |
| hsa-miR-373-5p  | NM_021209 | NLRC4 | 8.76E-06    | 5UTR |
| hsa-miR-373-3p  | NM_021209 | NLRC4 | 0.005454844 | CDS  |
| hsa-miR-375-3p  | NM_021209 | NLRC4 | 0.001137387 | CDS  |
| hsa-miR-376a-5p | NM_021209 | NLRC4 | 0.00043678  | CDS  |
| hsa-miR-376a-3p | NM_021209 | NLRC4 | 0.02815383  | CDS  |
| hsa-miR-377-5p  | NM_021209 | NLRC4 | 0.000664408 | CDS  |
| hsa-miR-377-5p  | NM_021209 | NLRC4 | 1.13E-05    | CDS  |
| hsa-miR-377-5p  | NM_021209 | NLRC4 | 0.000447908 | CDS  |
| hsa-miR-378a-5p | NM_021209 | NLRC4 | 0.000542111 | CDS  |
| hsa-miR-378a-3p | NM_021209 | NLRC4 | 0.02675239  | CDS  |
| hsa-miR-380-5p  | NM_021209 | NLRC4 | 0.00116715  | CDS  |
| hsa-miR-381-5p  | NM_021209 | NLRC4 | 4.02E-06    | CDS  |
| hsa-miR-381-5p  | NM_021209 | NLRC4 | 0.00043678  | CDS  |
| hsa-miR-381-5p  | NM_021209 | NLRC4 | 0.000293001 | CDS  |
| hsa-miR-381-3p  | NM_021209 | NLRC4 | 0.000507522 | CDS  |
| hsa-miR-381-3p  | NM_021209 | NLRC4 | 0.01388229  | CDS  |
| hsa-miR-381-3p  | NM_021209 | NLRC4 | 0.03650309  | 5UTR |
| hsa-miR-382-5p  | NM_021209 | NLRC4 | 0.000963264 | CDS  |
| hsa-miR-383-3p  | NM_021209 | NLRC4 | 7.08E-06    | CDS  |
| hsa-miR-330-5p  | NM_021209 | NLRC4 | 0.004474328 | CDS  |
| hsa-miR-330-5p  | NM_021209 | NLRC4 | 0.000106281 | CDS  |



|                 |           |       |             |      |
|-----------------|-----------|-------|-------------|------|
| hsa-miR-330-5p  | NM_021209 | NLRC4 | 7.16E-06    | CDS  |
| hsa-miR-330-3p  | NM_021209 | NLRC4 | 0.000464893 | CDS  |
| hsa-miR-328-5p  | NM_021209 | NLRC4 | 0.004916043 | 5UTR |
| hsa-miR-328-3p  | NM_021209 | NLRC4 | 1.35E-05    | CDS  |
| hsa-miR-328-3p  | NM_021209 | NLRC4 | 0.000143285 | CDS  |
| hsa-miR-328-3p  | NM_021209 | NLRC4 | 6.20E-05    | CDS  |
| hsa-miR-342-5p  | NM_021209 | NLRC4 | 4.18E-05    | CDS  |
| hsa-miR-342-5p  | NM_021209 | NLRC4 | 0.000101259 | CDS  |
| hsa-miR-342-5p  | NM_021209 | NLRC4 | 0.001516459 | CDS  |
| hsa-miR-323a-5p | NM_021209 | NLRC4 | 0.00013022  | CDS  |
| hsa-miR-323a-5p | NM_021209 | NLRC4 | 0.000384649 | CDS  |
| hsa-miR-323a-5p | NM_021209 | NLRC4 | 4.99E-06    | CDS  |
| hsa-miR-326     | NM_021209 | NLRC4 | 0.00120872  | CDS  |
| hsa-miR-326     | NM_021209 | NLRC4 | 7.16E-06    | CDS  |
| hsa-miR-326     | NM_021209 | NLRC4 | 0.000595816 | CDS  |
| hsa-miR-151a-5p | NM_021209 | NLRC4 | 0.001239845 | CDS  |
| hsa-miR-151a-5p | NM_021209 | NLRC4 | 0.000384216 | CDS  |
| hsa-miR-151a-3p | NM_021209 | NLRC4 | 0.001481713 | CDS  |
| hsa-miR-151a-3p | NM_021209 | NLRC4 | 0.000238785 | CDS  |
| hsa-miR-135b-5p | NM_021209 | NLRC4 | 0.07413136  | 5UTR |
| hsa-miR-135b-5p | NM_021209 | NLRC4 | 9.72E-05    | CDS  |
| hsa-miR-135b-5p | NM_021209 | NLRC4 | 0.000772438 | CDS  |
| hsa-miR-135b-3p | NM_021209 | NLRC4 | 3.53E-05    | CDS  |
| hsa-miR-331-5p  | NM_021209 | NLRC4 | 6.99E-05    | CDS  |
| hsa-miR-331-3p  | NM_021209 | NLRC4 | 0.02225154  | 5UTR |
| hsa-miR-331-3p  | NM_021209 | NLRC4 | 7.16E-06    | CDS  |
| hsa-miR-324-5p  | NM_021209 | NLRC4 | 2.82E-07    | CDS  |
| hsa-miR-324-5p  | NM_021209 | NLRC4 | 2.59E-05    | CDS  |
| hsa-miR-324-5p  | NM_021209 | NLRC4 | 7.69E-06    | CDS  |
| hsa-miR-324-3p  | NM_021209 | NLRC4 | 3.50E-05    | CDS  |
| hsa-miR-324-3p  | NM_021209 | NLRC4 | 2.82E-07    | CDS  |
| hsa-miR-338-3p  | NM_021209 | NLRC4 | 0.000174573 | CDS  |
| hsa-miR-339-5p  | NM_021209 | NLRC4 | 0.000381964 | CDS  |
| hsa-miR-339-3p  | NM_021209 | NLRC4 | 0.02165254  | CDS  |
| hsa-miR-339-3p  | NM_021209 | NLRC4 | 6.90E-06    | CDS  |
| hsa-miR-335-3p  | NM_021209 | NLRC4 | 0.004577843 | CDS  |
| hsa-miR-133b    | NM_021209 | NLRC4 | 0.000174148 | 5UTR |
| hsa-miR-133b    | NM_021209 | NLRC4 | 5.77E-05    | CDS  |
| hsa-miR-325     | NM_021209 | NLRC4 | 0.005039915 | 5UTR |
| hsa-miR-345-5p  | NM_021209 | NLRC4 | 1.22E-05    | CDS  |
| hsa-miR-345-5p  | NM_021209 | NLRC4 | 0.003088161 | CDS  |
| hsa-miR-345-3p  | NM_021209 | NLRC4 | 2.04E-05    | CDS  |
| hsa-miR-345-3p  | NM_021209 | NLRC4 | 7.09E-05    | 5UTR |
| hsa-miR-345-3p  | NM_021209 | NLRC4 | 0.002217478 | CDS  |

|                   |           |       |             |      |
|-------------------|-----------|-------|-------------|------|
| hsa-miR-346       | NM_021209 | NLRC4 | 8.86E-07    | CDS  |
| hsa-miR-346       | NM_021209 | NLRC4 | 0.000196593 | CDS  |
| hsa-miR-346       | NM_021209 | NLRC4 | 0.003923357 | CDS  |
| hsa-miR-196b-5p   | NM_021209 | NLRC4 | 0.00498711  | CDS  |
| hsa-miR-196b-3p   | NM_021209 | NLRC4 | 0.003455527 | CDS  |
| hsa-miR-196b-3p   | NM_021209 | NLRC4 | 0.000262096 | 5UTR |
| hsa-miR-422a      | NM_021209 | NLRC4 | 0.003230363 | 5UTR |
| hsa-miR-422a      | NM_021209 | NLRC4 | 0.01176218  | CDS  |
| hsa-miR-423-5p    | NM_021209 | NLRC4 | 0.001564227 | CDS  |
| hsa-miR-423-3p    | NM_021209 | NLRC4 | 1.91E-05    | CDS  |
| hsa-miR-423-3p    | NM_021209 | NLRC4 | 1.10E-08    | CDS  |
| hsa-miR-424-5p    | NM_021209 | NLRC4 | 9.20E-06    | CDS  |
| hsa-miR-424-5p    | NM_021209 | NLRC4 | 7.45E-06    | CDS  |
| hsa-miR-424-3p    | NM_021209 | NLRC4 | 0.000107277 | CDS  |
| hsa-miR-424-3p    | NM_021209 | NLRC4 | 0.000241027 | CDS  |
| hsa-miR-425-5p    | NM_021209 | NLRC4 | 0.003446949 | CDS  |
| hsa-miR-425-3p    | NM_021209 | NLRC4 | 0.001262872 | CDS  |
| hsa-miR-425-3p    | NM_021209 | NLRC4 | 0.00128942  | CDS  |
| hsa-miR-425-3p    | NM_021209 | NLRC4 | 1.91E-05    | CDS  |
| hsa-miR-18b-5p    | NM_021209 | NLRC4 | 6.66E-06    | CDS  |
| hsa-miR-18b-3p    | NM_021209 | NLRC4 | 0.000583201 | CDS  |
| hsa-miR-18b-3p    | NM_021209 | NLRC4 | 0.000166253 | CDS  |
| hsa-miR-20b-3p    | NM_021209 | NLRC4 | 9.02E-06    | CDS  |
| hsa-miR-20b-3p    | NM_021209 | NLRC4 | 6.02E-08    | CDS  |
| hsa-miR-448       | NM_021209 | NLRC4 | 9.46E-05    | CDS  |
| hsa-miR-449a      | NM_021209 | NLRC4 | 0.01176218  | CDS  |
| hsa-miR-450a-1-3p | NM_021209 | NLRC4 | 0.000228869 | CDS  |
| hsa-miR-431-5p    | NM_021209 | NLRC4 | 0.000757346 | CDS  |
| hsa-miR-431-3p    | NM_021209 | NLRC4 | 6.99E-05    | CDS  |
| hsa-miR-431-3p    | NM_021209 | NLRC4 | 0.002444199 | CDS  |
| hsa-miR-433-3p    | NM_021209 | NLRC4 | 0.000146875 | CDS  |
| hsa-miR-329-5p    | NM_021209 | NLRC4 | 0.001309985 | CDS  |
| hsa-miR-329-5p    | NM_021209 | NLRC4 | 0.01322285  | CDS  |
| hsa-miR-329-5p    | NM_021209 | NLRC4 | 0.000174632 | CDS  |
| hsa-miR-329-5p    | NM_021209 | NLRC4 | 0.001409008 | CDS  |
| hsa-miR-329-3p    | NM_021209 | NLRC4 | 0.000652497 | CDS  |
| hsa-miR-451a      | NM_021209 | NLRC4 | 0.001137387 | CDS  |
| hsa-miR-452-5p    | NM_021209 | NLRC4 | 0.000882282 | CDS  |
| hsa-miR-452-5p    | NM_021209 | NLRC4 | 0.000115293 | CDS  |
| hsa-miR-409-5p    | NM_021209 | NLRC4 | 8.39E-05    | CDS  |
| hsa-miR-409-5p    | NM_021209 | NLRC4 | 7.36E-05    | CDS  |
| hsa-miR-412-5p    | NM_021209 | NLRC4 | 3.99E-05    | CDS  |
| hsa-miR-412-3p    | NM_021209 | NLRC4 | 0.000285506 | 5UTR |
| hsa-miR-412-3p    | NM_021209 | NLRC4 | 0.001408827 | CDS  |

|                 |           |       |             |      |
|-----------------|-----------|-------|-------------|------|
| hsa-miR-412-3p  | NM_021209 | NLRC4 | 1.46E-05    | CDS  |
| hsa-miR-410-5p  | NM_021209 | NLRC4 | 0.02268423  | CDS  |
| hsa-miR-410-3p  | NM_021209 | NLRC4 | 2.79E-05    | CDS  |
| hsa-miR-376b-5p | NM_021209 | NLRC4 | 0.01718499  | CDS  |
| hsa-miR-483-5p  | NM_021209 | NLRC4 | 0.01924989  | CDS  |
| hsa-miR-483-3p  | NM_021209 | NLRC4 | 0.01024658  | CDS  |
| hsa-miR-484     | NM_021209 | NLRC4 | 1.91E-05    | CDS  |
| hsa-miR-485-5p  | NM_021209 | NLRC4 | 8.69E-06    | CDS  |
| hsa-miR-485-5p  | NM_021209 | NLRC4 | 4.35E-05    | CDS  |
| hsa-miR-485-3p  | NM_021209 | NLRC4 | 2.83E-05    | CDS  |
| hsa-miR-485-3p  | NM_021209 | NLRC4 | 1.22E-05    | CDS  |
| hsa-miR-485-3p  | NM_021209 | NLRC4 | 0.02545618  | 5UTR |
| hsa-miR-486-5p  | NM_021209 | NLRC4 | 0.02225154  | 5UTR |
| hsa-miR-486-3p  | NM_021209 | NLRC4 | 6.00E-06    | CDS  |
| hsa-miR-486-3p  | NM_021209 | NLRC4 | 0.001239845 | CDS  |
| hsa-miR-487a-5p | NM_021209 | NLRC4 | 0.001064408 | CDS  |
| hsa-miR-487a-3p | NM_021209 | NLRC4 | 0.0318968   | 5UTR |
| hsa-miR-488-5p  | NM_021209 | NLRC4 | 3.78E-05    | CDS  |
| hsa-miR-488-3p  | NM_021209 | NLRC4 | 0.000723292 | CDS  |
| hsa-miR-490-5p  | NM_021209 | NLRC4 | 3.50E-05    | CDS  |
| hsa-miR-490-3p  | NM_021209 | NLRC4 | 6.23E-05    | 5UTR |
| hsa-miR-490-3p  | NM_021209 | NLRC4 | 0.001218159 | CDS  |
| hsa-miR-491-5p  | NM_021209 | NLRC4 | 0.000345859 | CDS  |
| hsa-miR-491-5p  | NM_021209 | NLRC4 | 0.003560324 | CDS  |
| hsa-miR-491-5p  | NM_021209 | NLRC4 | 3.28E-05    | 5UTR |
| hsa-miR-491-3p  | NM_021209 | NLRC4 | 1.14E-05    | CDS  |
| hsa-miR-511-5p  | NM_021209 | NLRC4 | 0.01050676  | CDS  |
| hsa-miR-511-5p  | NM_021209 | NLRC4 | 0.1045722   | CDS  |
| hsa-miR-146b-5p | NM_021209 | NLRC4 | 0.000174632 | CDS  |
| hsa-miR-146b-3p | NM_021209 | NLRC4 | 0.009341621 | CDS  |
| hsa-miR-202-3p  | NM_021209 | NLRC4 | 0.000334534 | CDS  |
| hsa-miR-202-3p  | NM_021209 | NLRC4 | 7.36E-06    | CDS  |
| hsa-miR-492     | NM_021209 | NLRC4 | 3.78E-05    | CDS  |
| hsa-miR-492     | NM_021209 | NLRC4 | 0.001633284 | CDS  |
| hsa-miR-493-5p  | NM_021209 | NLRC4 | 0.001102841 | CDS  |
| hsa-miR-493-3p  | NM_021209 | NLRC4 | 0.003987316 | CDS  |
| hsa-miR-493-3p  | NM_021209 | NLRC4 | 0.001058805 | CDS  |
| hsa-miR-493-3p  | NM_021209 | NLRC4 | 0.000432941 | CDS  |
| hsa-miR-432-5p  | NM_021209 | NLRC4 | 0.00210636  | CDS  |
| hsa-miR-432-5p  | NM_021209 | NLRC4 | 0.001013066 | CDS  |
| hsa-miR-432-5p  | NM_021209 | NLRC4 | 0.02313586  | CDS  |
| hsa-miR-432-3p  | NM_021209 | NLRC4 | 7.74E-05    | CDS  |
| hsa-miR-432-3p  | NM_021209 | NLRC4 | 1.96E-05    | CDS  |
| hsa-miR-494-5p  | NM_021209 | NLRC4 | 0.003719112 | 5UTR |

|                 |           |       |             |      |
|-----------------|-----------|-------|-------------|------|
| hsa-miR-494-5p  | NM_021209 | NLRC4 | 1.46E-05    | CDS  |
| hsa-miR-494-5p  | NM_021209 | NLRC4 | 0.000294775 | CDS  |
| hsa-miR-494-5p  | NM_021209 | NLRC4 | 0.000772438 | CDS  |
| hsa-miR-193b-5p | NM_021209 | NLRC4 | 0.005846554 | 5UTR |
| hsa-miR-193b-5p | NM_021209 | NLRC4 | 3.17E-07    | CDS  |
| hsa-miR-497-5p  | NM_021209 | NLRC4 | 0.001159809 | CDS  |
| hsa-miR-497-5p  | NM_021209 | NLRC4 | 7.38E-06    | CDS  |
| hsa-miR-181d-5p | NM_021209 | NLRC4 | 0.006729548 | CDS  |
| hsa-miR-181d-5p | NM_021209 | NLRC4 | 7.76E-05    | CDS  |
| hsa-miR-181d-3p | NM_021209 | NLRC4 | 0.002934367 | CDS  |
| hsa-miR-181d-3p | NM_021209 | NLRC4 | 3.52E-05    | CDS  |
| hsa-miR-181d-3p | NM_021209 | NLRC4 | 7.09E-05    | 5UTR |
| hsa-miR-512-5p  | NM_021209 | NLRC4 | 2.31E-05    | CDS  |
| hsa-miR-512-5p  | NM_021209 | NLRC4 | 1.02E-05    | 5UTR |
| hsa-miR-512-3p  | NM_021209 | NLRC4 | 0.001062038 | CDS  |
| hsa-miR-512-3p  | NM_021209 | NLRC4 | 8.91E-06    | CDS  |
| hsa-miR-512-3p  | NM_021209 | NLRC4 | 0.000516525 | CDS  |
| hsa-miR-498-5p  | NM_021209 | NLRC4 | 2.31E-05    | 5UTR |
| hsa-miR-498-3p  | NM_021209 | NLRC4 | 0.000125663 | CDS  |
| hsa-miR-498-3p  | NM_021209 | NLRC4 | 7.01E-06    | CDS  |
| hsa-miR-520e-5p | NM_021209 | NLRC4 | 0.004557198 | CDS  |
| hsa-miR-515-3p  | NM_021209 | NLRC4 | 0.02165254  | CDS  |
| hsa-miR-519e-5p | NM_021209 | NLRC4 | 2.10E-05    | 5UTR |
| hsa-miR-519e-3p | NM_021209 | NLRC4 | 0.000164596 | CDS  |
| hsa-miR-519c-5p | NM_021209 | NLRC4 | 0.004557198 | CDS  |
| hsa-miR-519c-5p | NM_021209 | NLRC4 | 0.001727314 | CDS  |
| hsa-miR-519c-5p | NM_021209 | NLRC4 | 1.11E-05    | CDS  |
| hsa-miR-519c-3p | NM_021209 | NLRC4 | 0.004721326 | CDS  |
| hsa-miR-520a-5p | NM_021209 | NLRC4 | 1.11E-05    | CDS  |
| hsa-miR-520a-5p | NM_021209 | NLRC4 | 0.001727314 | CDS  |
| hsa-miR-520a-5p | NM_021209 | NLRC4 | 6.23E-05    | 5UTR |
| hsa-miR-526b-5p | NM_021209 | NLRC4 | 0.004557198 | CDS  |
| hsa-miR-526b-5p | NM_021209 | NLRC4 | 0.000147163 | CDS  |
| hsa-miR-519b-5p | NM_021209 | NLRC4 | 0.004557198 | CDS  |
| hsa-miR-519b-5p | NM_021209 | NLRC4 | 0.001727314 | CDS  |
| hsa-miR-519b-5p | NM_021209 | NLRC4 | 1.11E-05    | CDS  |
| hsa-miR-519b-3p | NM_021209 | NLRC4 | 0.01064677  | CDS  |
| hsa-miR-525-5p  | NM_021209 | NLRC4 | 0.001727314 | CDS  |
| hsa-miR-525-5p  | NM_021209 | NLRC4 | 1.11E-05    | CDS  |
| hsa-miR-525-5p  | NM_021209 | NLRC4 | 0.001637361 | CDS  |
| hsa-miR-525-3p  | NM_021209 | NLRC4 | 1.13E-05    | CDS  |
| hsa-miR-525-3p  | NM_021209 | NLRC4 | 1.86E-05    | CDS  |
| hsa-miR-525-3p  | NM_021209 | NLRC4 | 0.00151455  | CDS  |
| hsa-miR-523-5p  | NM_021209 | NLRC4 | 0.004557198 | CDS  |

|                 |           |       |             |      |
|-----------------|-----------|-------|-------------|------|
| hsa-miR-523-5p  | NM_021209 | NLRC4 | 0.001727314 | CDS  |
| hsa-miR-523-5p  | NM_021209 | NLRC4 | 1.11E-05    | CDS  |
| hsa-miR-523-3p  | NM_021209 | NLRC4 | 1.86E-05    | CDS  |
| hsa-miR-518f-5p | NM_021209 | NLRC4 | 1.11E-05    | CDS  |
| hsa-miR-518f-5p | NM_021209 | NLRC4 | 0.001727314 | CDS  |
| hsa-miR-518f-3p | NM_021209 | NLRC4 | 0.007995041 | CDS  |
| hsa-miR-518f-3p | NM_021209 | NLRC4 | 0.004721326 | CDS  |
| hsa-miR-520b-5p | NM_021209 | NLRC4 | 5.22E-07    | CDS  |
| hsa-miR-520b-5p | NM_021209 | NLRC4 | 0.001408827 | CDS  |
| hsa-miR-518b    | NM_021209 | NLRC4 | 1.61E-05    | CDS  |
| hsa-miR-518b    | NM_021209 | NLRC4 | 6.37E-06    | CDS  |
| hsa-miR-526a-5p | NM_021209 | NLRC4 | 0.001727314 | CDS  |
| hsa-miR-526a-5p | NM_021209 | NLRC4 | 1.11E-05    | CDS  |
| hsa-miR-520c-5p | NM_021209 | NLRC4 | 0.001727314 | CDS  |
| hsa-miR-520c-5p | NM_021209 | NLRC4 | 1.11E-05    | CDS  |
| hsa-miR-518c-5p | NM_021209 | NLRC4 | 7.16E-06    | CDS  |
| hsa-miR-518c-5p | NM_021209 | NLRC4 | 0.002919858 | 5UTR |
| hsa-miR-518c-3p | NM_021209 | NLRC4 | 6.37E-06    | CDS  |
| hsa-miR-518c-3p | NM_021209 | NLRC4 | 0.004721326 | CDS  |
| hsa-miR-524-3p  | NM_021209 | NLRC4 | 2.91E-05    | 5UTR |
| hsa-miR-524-3p  | NM_021209 | NLRC4 | 1.13E-05    | CDS  |
| hsa-miR-524-3p  | NM_021209 | NLRC4 | 1.86E-05    | CDS  |
| hsa-miR-517a-3p | NM_021209 | NLRC4 | 6.23E-05    | CDS  |
| hsa-miR-519d-5p | NM_021209 | NLRC4 | 0.000119651 | CDS  |
| hsa-miR-519d-5p | NM_021209 | NLRC4 | 0.01018554  | CDS  |
| hsa-miR-519d-3p | NM_021209 | NLRC4 | 1.01E-05    | CDS  |
| hsa-miR-521     | NM_021209 | NLRC4 | 6.37E-06    | CDS  |
| hsa-miR-520d-3p | NM_021209 | NLRC4 | 2.88E-05    | CDS  |
| hsa-miR-520d-3p | NM_021209 | NLRC4 | 0.004768539 | CDS  |
| hsa-miR-517b-3p | NM_021209 | NLRC4 | 6.23E-05    | CDS  |
| hsa-miR-520g-5p | NM_021209 | NLRC4 | 0.001727314 | CDS  |
| hsa-miR-516b-5p | NM_021209 | NLRC4 | 0.05383761  | CDS  |
| hsa-miR-516b-3p | NM_021209 | NLRC4 | 0.000301215 | CDS  |
| hsa-miR-518e-5p | NM_021209 | NLRC4 | 0.004557198 | CDS  |
| hsa-miR-518e-5p | NM_021209 | NLRC4 | 0.001727314 | CDS  |
| hsa-miR-518e-5p | NM_021209 | NLRC4 | 1.11E-05    | CDS  |
| hsa-miR-518e-3p | NM_021209 | NLRC4 | 6.37E-06    | CDS  |
| hsa-miR-518e-3p | NM_021209 | NLRC4 | 2.59E-05    | CDS  |
| hsa-miR-518a-5p | NM_021209 | NLRC4 | 5.03E-05    | 5UTR |
| hsa-miR-518a-3p | NM_021209 | NLRC4 | 0.001815418 | CDS  |
| hsa-miR-518d-5p | NM_021209 | NLRC4 | 0.001727314 | CDS  |
| hsa-miR-518d-5p | NM_021209 | NLRC4 | 1.11E-05    | CDS  |
| hsa-miR-518d-3p | NM_021209 | NLRC4 | 6.37E-06    | CDS  |
| hsa-miR-518d-3p | NM_021209 | NLRC4 | 2.79E-05    | CDS  |

|                   |           |       |             |      |
|-------------------|-----------|-------|-------------|------|
| hsa-miR-518d-3p   | NM_021209 | NLRC4 | 2.59E-05    | CDS  |
| hsa-miR-517c-3p   | NM_021209 | NLRC4 | 6.23E-05    | CDS  |
| hsa-miR-522-5p    | NM_021209 | NLRC4 | 0.004557198 | CDS  |
| hsa-miR-522-5p    | NM_021209 | NLRC4 | 0.001727314 | CDS  |
| hsa-miR-522-5p    | NM_021209 | NLRC4 | 1.11E-05    | CDS  |
| hsa-miR-522-3p    | NM_021209 | NLRC4 | 0.01064677  | CDS  |
| hsa-miR-519a-5p   | NM_021209 | NLRC4 | 0.004557198 | CDS  |
| hsa-miR-519a-5p   | NM_021209 | NLRC4 | 0.001727314 | CDS  |
| hsa-miR-519a-5p   | NM_021209 | NLRC4 | 1.11E-05    | CDS  |
| hsa-miR-519a-3p   | NM_021209 | NLRC4 | 1.01E-05    | CDS  |
| hsa-miR-519a-3p   | NM_021209 | NLRC4 | 0.004721326 | CDS  |
| hsa-miR-527       | NM_021209 | NLRC4 | 5.03E-05    | 5UTR |
| hsa-miR-516a-3p   | NM_021209 | NLRC4 | 0.000301215 | CDS  |
| hsa-miR-519a-2-5p | NM_021209 | NLRC4 | 5.22E-07    | CDS  |
| hsa-miR-519a-2-5p | NM_021209 | NLRC4 | 0.001408827 | CDS  |
| hsa-miR-499a-3p   | NM_021209 | NLRC4 | 0.000108131 | CDS  |
| hsa-miR-500a-5p   | NM_021209 | NLRC4 | 0.009867866 | CDS  |
| hsa-miR-500a-5p   | NM_021209 | NLRC4 | 0.000187665 | CDS  |
| hsa-miR-500a-3p   | NM_021209 | NLRC4 | 0.000507522 | CDS  |
| hsa-miR-500a-3p   | NM_021209 | NLRC4 | 0.006363825 | 5UTR |
| hsa-miR-501-5p    | NM_021209 | NLRC4 | 0.000535268 | CDS  |
| hsa-miR-501-5p    | NM_021209 | NLRC4 | 0.01928178  | CDS  |
| hsa-miR-501-3p    | NM_021209 | NLRC4 | 0.002837809 | CDS  |
| hsa-miR-501-3p    | NM_021209 | NLRC4 | 4.19E-05    | CDS  |
| hsa-miR-502-5p    | NM_021209 | NLRC4 | 0.000187665 | CDS  |
| hsa-miR-502-5p    | NM_021209 | NLRC4 | 0.000114297 | CDS  |
| hsa-miR-502-3p    | NM_021209 | NLRC4 | 0.002837809 | CDS  |
| hsa-miR-502-3p    | NM_021209 | NLRC4 | 0.000289672 | CDS  |
| hsa-miR-502-3p    | NM_021209 | NLRC4 | 0.1076955   | CDS  |
| hsa-miR-502-3p    | NM_021209 | NLRC4 | 0.006363825 | 5UTR |
| hsa-miR-450a-2-3p | NM_021209 | NLRC4 | 0.000228869 | CDS  |
| hsa-miR-450a-2-3p | NM_021209 | NLRC4 | 3.28E-05    | 5UTR |
| hsa-miR-503-5p    | NM_021209 | NLRC4 | 4.41E-05    | CDS  |
| hsa-miR-503-3p    | NM_021209 | NLRC4 | 9.02E-06    | CDS  |
| hsa-miR-503-3p    | NM_021209 | NLRC4 | 0.000511852 | CDS  |
| hsa-miR-504-5p    | NM_021209 | NLRC4 | 1.82E-06    | CDS  |
| hsa-miR-504-5p    | NM_021209 | NLRC4 | 0.000466531 | 5UTR |
| hsa-miR-504-3p    | NM_021209 | NLRC4 | 6.44E-05    | CDS  |
| hsa-miR-504-3p    | NM_021209 | NLRC4 | 0.08715581  | CDS  |
| hsa-miR-505-5p    | NM_021209 | NLRC4 | 0.000268963 | CDS  |
| hsa-miR-513a-5p   | NM_021209 | NLRC4 | 1.11E-05    | CDS  |
| hsa-miR-513a-5p   | NM_021209 | NLRC4 | 0.02825249  | CDS  |
| hsa-miR-506-3p    | NM_021209 | NLRC4 | 2.21E-05    | 5UTR |
| hsa-miR-506-3p    | NM_021209 | NLRC4 | 6.37E-06    | CDS  |

|                   |           |       |             |      |
|-------------------|-----------|-------|-------------|------|
| hsa-miR-507       | NM_021209 | NLRC4 | 1.91E-05    | 5UTR |
| hsa-miR-507       | NM_021209 | NLRC4 | 0.00027781  | CDS  |
| hsa-miR-507       | NM_021209 | NLRC4 | 0.1076955   | CDS  |
| hsa-miR-508-5p    | NM_021209 | NLRC4 | 1.11E-05    | CDS  |
| hsa-miR-508-5p    | NM_021209 | NLRC4 | 7.38E-06    | CDS  |
| hsa-miR-508-3p    | NM_021209 | NLRC4 | 0.000170577 | CDS  |
| hsa-miR-508-3p    | NM_021209 | NLRC4 | 0.000603841 | 5UTR |
| hsa-miR-509-5p    | NM_021209 | NLRC4 | 0.000502803 | CDS  |
| hsa-miR-509-5p    | NM_021209 | NLRC4 | 1.12E-06    | CDS  |
| hsa-miR-509-3p    | NM_021209 | NLRC4 | 0.008722516 | CDS  |
| hsa-miR-510-5p    | NM_021209 | NLRC4 | 6.14E-05    | CDS  |
| hsa-miR-510-5p    | NM_021209 | NLRC4 | 0.01064963  | CDS  |
| hsa-miR-514a-5p   | NM_021209 | NLRC4 | 0.001218159 | CDS  |
| hsa-miR-514a-5p   | NM_021209 | NLRC4 | 5.78E-07    | CDS  |
| hsa-miR-514a-3p   | NM_021209 | NLRC4 | 4.25E-05    | CDS  |
| hsa-miR-532-5p    | NM_021209 | NLRC4 | 0.000915739 | 5UTR |
| hsa-miR-532-5p    | NM_021209 | NLRC4 | 6.96E-05    | CDS  |
| hsa-miR-532-5p    | NM_021209 | NLRC4 | 0.003587217 | CDS  |
| hsa-miR-532-3p    | NM_021209 | NLRC4 | 0.02111429  | CDS  |
| hsa-miR-455-3p    | NM_021209 | NLRC4 | 1.14E-07    | CDS  |
| hsa-miR-455-3p    | NM_021209 | NLRC4 | 0.000334534 | CDS  |
| hsa-miR-376a-2-5p | NM_021209 | NLRC4 | 0.00043678  | CDS  |
| hsa-miR-487b-5p   | NM_021209 | NLRC4 | 0.01718499  | CDS  |
| hsa-miR-487b-5p   | NM_021209 | NLRC4 | 0.003401124 | 5UTR |
| hsa-miR-487b-3p   | NM_021209 | NLRC4 | 0.008906653 | CDS  |
| hsa-miR-551a      | NM_021209 | NLRC4 | 0.000167343 | CDS  |
| hsa-miR-551a      | NM_021209 | NLRC4 | 9.54E-06    | CDS  |
| hsa-miR-552-5p    | NM_021209 | NLRC4 | 8.38E-06    | CDS  |
| hsa-miR-552-3p    | NM_021209 | NLRC4 | 0.00107409  | CDS  |
| hsa-miR-554       | NM_021209 | NLRC4 | 6.41E-06    | CDS  |
| hsa-miR-554       | NM_021209 | NLRC4 | 0.01194815  | CDS  |
| hsa-miR-92b-3p    | NM_021209 | NLRC4 | 6.16E-05    | CDS  |
| hsa-miR-92b-3p    | NM_021209 | NLRC4 | 0.01275645  | CDS  |
| hsa-miR-92b-3p    | NM_021209 | NLRC4 | 9.46E-05    | CDS  |
| hsa-miR-555       | NM_021209 | NLRC4 | 0.02490019  | CDS  |
| hsa-miR-557       | NM_021209 | NLRC4 | 0.00059879  | CDS  |
| hsa-miR-557       | NM_021209 | NLRC4 | 0.0101559   | CDS  |
| hsa-miR-558       | NM_021209 | NLRC4 | 3.76E-06    | CDS  |
| hsa-miR-564       | NM_021209 | NLRC4 | 4.24E-05    | CDS  |
| hsa-miR-564       | NM_021209 | NLRC4 | 5.17E-05    | CDS  |
| hsa-miR-564       | NM_021209 | NLRC4 | 5.90E-05    | CDS  |
| hsa-miR-564       | NM_021209 | NLRC4 | 0.02165254  | CDS  |
| hsa-miR-567       | NM_021209 | NLRC4 | 0.00332693  | CDS  |
| hsa-miR-551b-5p   | NM_021209 | NLRC4 | 0.001006519 | CDS  |

|                 |           |       |             |      |
|-----------------|-----------|-------|-------------|------|
| hsa-miR-551b-5p | NM_021209 | NLRC4 | 1.91E-05    | CDS  |
| hsa-miR-551b-5p | NM_021209 | NLRC4 | 0.009181635 | CDS  |
| hsa-miR-551b-3p | NM_021209 | NLRC4 | 0.000167343 | CDS  |
| hsa-miR-569     | NM_021209 | NLRC4 | 0.000111626 | 5UTR |
| hsa-miR-571     | NM_021209 | NLRC4 | 0.000156752 | CDS  |
| hsa-miR-571     | NM_021209 | NLRC4 | 0.000112833 | CDS  |
| hsa-miR-572     | NM_021209 | NLRC4 | 5.54E-06    | CDS  |
| hsa-miR-572     | NM_021209 | NLRC4 | 1.05E-05    | 5UTR |
| hsa-miR-572     | NM_021209 | NLRC4 | 7.28E-06    | CDS  |
| hsa-miR-573     | NM_021209 | NLRC4 | 0.006635339 | CDS  |
| hsa-miR-574-5p  | NM_021209 | NLRC4 | 0.05606478  | CDS  |
| hsa-miR-574-3p  | NM_021209 | NLRC4 | 6.58E-06    | CDS  |
| hsa-miR-575     | NM_021209 | NLRC4 | 0.000132382 | CDS  |
| hsa-miR-575     | NM_021209 | NLRC4 | 0.005855153 | CDS  |
| hsa-miR-578     | NM_021209 | NLRC4 | 0.000352314 | CDS  |
| hsa-miR-579-5p  | NM_021209 | NLRC4 | 0.001114676 | CDS  |
| hsa-miR-581     | NM_021209 | NLRC4 | 0.01012803  | 5UTR |
| hsa-miR-583     | NM_021209 | NLRC4 | 0.000795975 | CDS  |
| hsa-miR-584-5p  | NM_021209 | NLRC4 | 0.001051738 | CDS  |
| hsa-miR-584-3p  | NM_021209 | NLRC4 | 0.000112833 | CDS  |
| hsa-miR-585-5p  | NM_021209 | NLRC4 | 0.005241017 | CDS  |
| hsa-miR-587     | NM_021209 | NLRC4 | 0.000121627 | CDS  |
| hsa-miR-587     | NM_021209 | NLRC4 | 0.001872601 | CDS  |
| hsa-miR-587     | NM_021209 | NLRC4 | 0.00120872  | CDS  |
| hsa-miR-588     | NM_021209 | NLRC4 | 0.001503355 | CDS  |
| hsa-miR-588     | NM_021209 | NLRC4 | 1.60E-06    | CDS  |
| hsa-miR-589-5p  | NM_021209 | NLRC4 | 1.13E-05    | CDS  |
| hsa-miR-589-5p  | NM_021209 | NLRC4 | 1.04E-05    | CDS  |
| hsa-miR-550a-5p | NM_021209 | NLRC4 | 0.07065603  | CDS  |
| hsa-miR-550a-5p | NM_021209 | NLRC4 | 0.000153631 | CDS  |
| hsa-miR-550a-5p | NM_021209 | NLRC4 | 0.000133333 | CDS  |
| hsa-miR-550a-3p | NM_021209 | NLRC4 | 7.08E-06    | CDS  |
| hsa-miR-590-5p  | NM_021209 | NLRC4 | 0.000129339 | CDS  |
| hsa-miR-593-5p  | NM_021209 | NLRC4 | 6.98E-06    | CDS  |
| hsa-miR-593-5p  | NM_021209 | NLRC4 | 4.05E-05    | CDS  |
| hsa-miR-593-3p  | NM_021209 | NLRC4 | 6.96E-05    | CDS  |
| hsa-miR-593-3p  | NM_021209 | NLRC4 | 7.53E-05    | CDS  |
| hsa-miR-595     | NM_021209 | NLRC4 | 0.000445653 | CDS  |
| hsa-miR-595     | NM_021209 | NLRC4 | 7.08E-06    | CDS  |
| hsa-miR-595     | NM_021209 | NLRC4 | 7.55E-05    | CDS  |
| hsa-miR-596     | NM_021209 | NLRC4 | 1.05E-05    | CDS  |
| hsa-miR-596     | NM_021209 | NLRC4 | 0.00037471  | CDS  |
| hsa-miR-596     | NM_021209 | NLRC4 | 0.000646339 | CDS  |
| hsa-miR-597-5p  | NM_021209 | NLRC4 | 4.30E-06    | CDS  |



|                |           |       |             |      |
|----------------|-----------|-------|-------------|------|
| hsa-miR-597-5p | NM_021209 | NLRC4 | 7.09E-05    | 5UTR |
| hsa-miR-597-3p | NM_021209 | NLRC4 | 0.001064408 | CDS  |
| hsa-miR-598-5p | NM_021209 | NLRC4 | 0.01194815  | CDS  |
| hsa-miR-598-5p | NM_021209 | NLRC4 | 0.003401124 | 5UTR |
| hsa-miR-598-3p | NM_021209 | NLRC4 | 0.005140746 | CDS  |
| hsa-miR-600    | NM_021209 | NLRC4 | 0.02825249  | CDS  |
| hsa-miR-600    | NM_021209 | NLRC4 | 0.000159806 | CDS  |
| hsa-miR-600    | NM_021209 | NLRC4 | 0.000926972 | CDS  |
| hsa-miR-601    | NM_021209 | NLRC4 | 0.02621044  | CDS  |
| hsa-miR-602    | NM_021209 | NLRC4 | 6.71E-05    | 5UTR |
| hsa-miR-602    | NM_021209 | NLRC4 | 1.97E-05    | CDS  |
| hsa-miR-604    | NM_021209 | NLRC4 | 0.000294775 | CDS  |
| hsa-miR-604    | NM_021209 | NLRC4 | 1.77E-06    | CDS  |
| hsa-miR-605-5p | NM_021209 | NLRC4 | 0.000245493 | CDS  |
| hsa-miR-605-5p | NM_021209 | NLRC4 | 0.000583201 | CDS  |
| hsa-miR-605-5p | NM_021209 | NLRC4 | 0.000126832 | CDS  |
| hsa-miR-608    | NM_021209 | NLRC4 | 0.05045639  | CDS  |
| hsa-miR-608    | NM_021209 | NLRC4 | 2.91E-05    | 5UTR |
| hsa-miR-609    | NM_021209 | NLRC4 | 0.001262872 | CDS  |
| hsa-miR-609    | NM_021209 | NLRC4 | 0.000119411 | CDS  |
| hsa-miR-610    | NM_021209 | NLRC4 | 0.000271137 | CDS  |
| hsa-miR-610    | NM_021209 | NLRC4 | 0.003134616 | CDS  |
| hsa-miR-611    | NM_021209 | NLRC4 | 5.44E-05    | 5UTR |
| hsa-miR-612    | NM_021209 | NLRC4 | 0.1530098   | CDS  |
| hsa-miR-612    | NM_021209 | NLRC4 | 0.001914154 | CDS  |
| hsa-miR-614    | NM_021209 | NLRC4 | 0.06684233  | CDS  |
| hsa-miR-614    | NM_021209 | NLRC4 | 3.90E-05    | CDS  |
| hsa-miR-614    | NM_021209 | NLRC4 | 8.56E-06    | CDS  |
| hsa-miR-615-5p | NM_021209 | NLRC4 | 4.59E-05    | CDS  |
| hsa-miR-615-5p | NM_021209 | NLRC4 | 0.00303577  | CDS  |
| hsa-miR-615-3p | NM_021209 | NLRC4 | 1.92E-05    | CDS  |
| hsa-miR-616-3p | NM_021209 | NLRC4 | 0.0262907   | CDS  |
| hsa-miR-616-3p | NM_021209 | NLRC4 | 0.002052023 | CDS  |
| hsa-miR-617    | NM_021209 | NLRC4 | 0.000302528 | 5UTR |
| hsa-miR-618    | NM_021209 | NLRC4 | 0.00561403  | CDS  |
| hsa-miR-619-5p | NM_021209 | NLRC4 | 0.001027397 | CDS  |
| hsa-miR-619-5p | NM_021209 | NLRC4 | 0.000107468 | CDS  |
| hsa-miR-619-5p | NM_021209 | NLRC4 | 0.02837663  | CDS  |
| hsa-miR-619-3p | NM_021209 | NLRC4 | 0.000104356 | CDS  |
| hsa-miR-619-3p | NM_021209 | NLRC4 | 0.000406814 | CDS  |
| hsa-miR-621    | NM_021209 | NLRC4 | 0.000105297 | CDS  |
| hsa-miR-622    | NM_021209 | NLRC4 | 0.001033441 | CDS  |
| hsa-miR-622    | NM_021209 | NLRC4 | 0.001445108 | CDS  |
| hsa-miR-623    | NM_021209 | NLRC4 | 0.006055493 | CDS  |

|                 |           |       |             |      |
|-----------------|-----------|-------|-------------|------|
| hsa-miR-623     | NM_021209 | NLRC4 | 0.000239915 | CDS  |
| hsa-miR-624-5p  | NM_021209 | NLRC4 | 0.01135416  | 5UTR |
| hsa-miR-625-5p  | NM_021209 | NLRC4 | 0.000795975 | CDS  |
| hsa-miR-625-3p  | NM_021209 | NLRC4 | 1.60E-05    | CDS  |
| hsa-miR-627-5p  | NM_021209 | NLRC4 | 0.003661642 | CDS  |
| hsa-miR-628-5p  | NM_021209 | NLRC4 | 0.001169957 | CDS  |
| hsa-miR-628-3p  | NM_021209 | NLRC4 | 0.003925449 | CDS  |
| hsa-miR-629-5p  | NM_021209 | NLRC4 | 0.01919602  | CDS  |
| hsa-miR-629-3p  | NM_021209 | NLRC4 | 0.000116174 | CDS  |
| hsa-miR-629-3p  | NM_021209 | NLRC4 | 0.000167343 | CDS  |
| hsa-miR-630     | NM_021209 | NLRC4 | 0.000469993 | CDS  |
| hsa-miR-33b-5p  | NM_021209 | NLRC4 | 2.92E-05    | CDS  |
| hsa-miR-33b-3p  | NM_021209 | NLRC4 | 6.99E-05    | CDS  |
| hsa-miR-33b-3p  | NM_021209 | NLRC4 | 2.73E-06    | CDS  |
| hsa-miR-632     | NM_021209 | NLRC4 | 0.00661909  | CDS  |
| hsa-miR-635     | NM_021209 | NLRC4 | 0.000107277 | CDS  |
| hsa-miR-635     | NM_021209 | NLRC4 | 0.000326334 | CDS  |
| hsa-miR-636     | NM_021209 | NLRC4 | 0.001102117 | CDS  |
| hsa-miR-637     | NM_021209 | NLRC4 | 0.001135043 | CDS  |
| hsa-miR-637     | NM_021209 | NLRC4 | 0.03273842  | CDS  |
| hsa-miR-637     | NM_021209 | NLRC4 | 1.96E-05    | CDS  |
| hsa-miR-638     | NM_021209 | NLRC4 | 0.00303577  | CDS  |
| hsa-miR-638     | NM_021209 | NLRC4 | 2.91E-05    | 5UTR |
| hsa-miR-639     | NM_021209 | NLRC4 | 0.01340961  | CDS  |
| hsa-miR-639     | NM_021209 | NLRC4 | 0.00011008  | CDS  |
| hsa-miR-641     | NM_021209 | NLRC4 | 0.03853794  | 5UTR |
| hsa-miR-642a-5p | NM_021209 | NLRC4 | 0.000148632 | CDS  |
| hsa-miR-642a-3p | NM_021209 | NLRC4 | 0.003190413 | CDS  |
| hsa-miR-644a    | NM_021209 | NLRC4 | 3.82E-05    | CDS  |
| hsa-miR-644a    | NM_021209 | NLRC4 | 0.000379735 | CDS  |
| hsa-miR-645     | NM_021209 | NLRC4 | 0.03159106  | CDS  |
| hsa-miR-646     | NM_021209 | NLRC4 | 0.009935842 | CDS  |
| hsa-miR-649     | NM_021209 | NLRC4 | 0.00372152  | CDS  |
| hsa-miR-650     | NM_021209 | NLRC4 | 0.000142999 | CDS  |
| hsa-miR-650     | NM_021209 | NLRC4 | 3.18E-05    | CDS  |
| hsa-miR-652-5p  | NM_021209 | NLRC4 | 3.41E-06    | CDS  |
| hsa-miR-652-5p  | NM_021209 | NLRC4 | 0.00013388  | CDS  |
| hsa-miR-652-5p  | NM_021209 | NLRC4 | 0.002217478 | CDS  |
| hsa-miR-652-3p  | NM_021209 | NLRC4 | 9.56E-06    | CDS  |
| hsa-miR-661     | NM_021209 | NLRC4 | 2.92E-05    | CDS  |
| hsa-miR-661     | NM_021209 | NLRC4 | 0.004730357 | CDS  |
| hsa-miR-662     | NM_021209 | NLRC4 | 4.84E-07    | CDS  |
| hsa-miR-662     | NM_021209 | NLRC4 | 1.08E-05    | CDS  |
| hsa-miR-662     | NM_021209 | NLRC4 | 3.50E-05    | CDS  |

|                   |           |       |             |      |
|-------------------|-----------|-------|-------------|------|
| hsa-miR-662       | NM_021209 | NLRC4 | 0.000778346 | CDS  |
| hsa-miR-663a      | NM_021209 | NLRC4 | 1.00E-06    | CDS  |
| hsa-miR-663a      | NM_021209 | NLRC4 | 5.44E-05    | 5UTR |
| hsa-miR-449b-5p   | NM_021209 | NLRC4 | 9.79E-05    | CDS  |
| hsa-miR-449b-3p   | NM_021209 | NLRC4 | 0.000174645 | CDS  |
| hsa-miR-449b-3p   | NM_021209 | NLRC4 | 1.46E-05    | CDS  |
| hsa-miR-654-5p    | NM_021209 | NLRC4 | 0.002815688 | CDS  |
| hsa-miR-654-3p    | NM_021209 | NLRC4 | 0.000235004 | CDS  |
| hsa-miR-655-5p    | NM_021209 | NLRC4 | 5.97E-06    | CDS  |
| hsa-miR-656-5p    | NM_021209 | NLRC4 | 0.00498711  | CDS  |
| hsa-miR-656-5p    | NM_021209 | NLRC4 | 7.24E-05    | CDS  |
| hsa-miR-656-5p    | NM_021209 | NLRC4 | 0.006198772 | CDS  |
| hsa-miR-549a-5p   | NM_021209 | NLRC4 | 0.000129339 | CDS  |
| hsa-miR-549a-5p   | NM_021209 | NLRC4 | 0.000953849 | CDS  |
| hsa-miR-657       | NM_021209 | NLRC4 | 6.08E-06    | CDS  |
| hsa-miR-658       | NM_021209 | NLRC4 | 0.003824517 | CDS  |
| hsa-miR-659-5p    | NM_021209 | NLRC4 | 0.000125663 | CDS  |
| hsa-miR-659-3p    | NM_021209 | NLRC4 | 0.04526314  | CDS  |
| hsa-miR-659-3p    | NM_021209 | NLRC4 | 0.000267696 | CDS  |
| hsa-miR-659-3p    | NM_021209 | NLRC4 | 0.004030374 | CDS  |
| hsa-miR-660-3p    | NM_021209 | NLRC4 | 0.001022618 | CDS  |
| hsa-miR-660-3p    | NM_021209 | NLRC4 | 0.03271231  | CDS  |
| hsa-miR-542-5p    | NM_021209 | NLRC4 | 0.000749413 | CDS  |
| hsa-miR-542-5p    | NM_021209 | NLRC4 | 0.000511852 | CDS  |
| hsa-miR-542-5p    | NM_021209 | NLRC4 | 0.005514936 | CDS  |
| hsa-miR-758-3p    | NM_021209 | NLRC4 | 0.000319363 | 5UTR |
| hsa-miR-758-3p    | NM_021209 | NLRC4 | 0.000123515 | CDS  |
| hsa-miR-1264      | NM_021209 | NLRC4 | 0.009681347 | CDS  |
| hsa-miR-671-5p    | NM_021209 | NLRC4 | 4.59E-05    | CDS  |
| hsa-miR-671-5p    | NM_021209 | NLRC4 | 0.000671559 | CDS  |
| hsa-miR-671-5p    | NM_021209 | NLRC4 | 1.53E-05    | CDS  |
| hsa-miR-671-3p    | NM_021209 | NLRC4 | 7.28E-06    | CDS  |
| hsa-miR-671-3p    | NM_021209 | NLRC4 | 5.45E-06    | CDS  |
| hsa-miR-668-5p    | NM_021209 | NLRC4 | 1.14E-07    | CDS  |
| hsa-miR-668-5p    | NM_021209 | NLRC4 | 0.006396492 | CDS  |
| hsa-miR-668-3p    | NM_021209 | NLRC4 | 0.000196593 | CDS  |
| hsa-miR-668-3p    | NM_021209 | NLRC4 | 0.000113041 | CDS  |
| hsa-miR-668-3p    | NM_021209 | NLRC4 | 1.46E-05    | CDS  |
| hsa-miR-550a-3-5p | NM_021209 | NLRC4 | 2.73E-06    | CDS  |
| hsa-miR-550a-3-5p | NM_021209 | NLRC4 | 0.000133333 | CDS  |
| hsa-miR-767-5p    | NM_021209 | NLRC4 | 0.1076955   | CDS  |
| hsa-miR-767-3p    | NM_021209 | NLRC4 | 3.81E-05    | CDS  |
| hsa-miR-767-3p    | NM_021209 | NLRC4 | 0.003923357 | CDS  |
| hsa-miR-1224-5p   | NM_021209 | NLRC4 | 0.002007726 | 5UTR |

|                   |           |       |             |      |
|-------------------|-----------|-------|-------------|------|
| hsa-miR-1224-5p   | NM_021209 | NLRC4 | 0.01247752  | CDS  |
| hsa-miR-1224-3p   | NM_021209 | NLRC4 | 0.000612062 | CDS  |
| hsa-miR-151b      | NM_021209 | NLRC4 | 0.001239845 | CDS  |
| hsa-miR-320b      | NM_021209 | NLRC4 | 0.01442079  | 5UTR |
| hsa-miR-320b      | NM_021209 | NLRC4 | 4.24E-05    | CDS  |
| hsa-miR-320b      | NM_021209 | NLRC4 | 0.001567866 | CDS  |
| hsa-miR-320c      | NM_021209 | NLRC4 | 0.001567866 | CDS  |
| hsa-miR-320c      | NM_021209 | NLRC4 | 0.02227046  | CDS  |
| hsa-miR-1296-5p   | NM_021209 | NLRC4 | 0.001661235 | CDS  |
| hsa-miR-1296-5p   | NM_021209 | NLRC4 | 6.65E-06    | CDS  |
| hsa-miR-1296-5p   | NM_021209 | NLRC4 | 1.35E-05    | CDS  |
| hsa-miR-1296-3p   | NM_021209 | NLRC4 | 2.06E-05    | CDS  |
| hsa-miR-1296-3p   | NM_021209 | NLRC4 | 0.000171267 | CDS  |
| hsa-miR-1296-3p   | NM_021209 | NLRC4 | 0.000357171 | CDS  |
| hsa-miR-1296-3p   | NM_021209 | NLRC4 | 0.00933987  | CDS  |
| hsa-miR-1468-5p   | NM_021209 | NLRC4 | 0.000719145 | CDS  |
| hsa-miR-1323      | NM_021209 | NLRC4 | 0.000241027 | CDS  |
| hsa-miR-1271-5p   | NM_021209 | NLRC4 | 0.000250561 | CDS  |
| hsa-miR-1271-5p   | NM_021209 | NLRC4 | 6.98E-06    | CDS  |
| hsa-miR-1271-3p   | NM_021209 | NLRC4 | 7.25E-06    | CDS  |
| hsa-miR-1271-3p   | NM_021209 | NLRC4 | 0.000945067 | CDS  |
| hsa-miR-1301-5p   | NM_021209 | NLRC4 | 6.58E-06    | CDS  |
| hsa-miR-1301-5p   | NM_021209 | NLRC4 | 1.98E-07    | CDS  |
| hsa-miR-1301-5p   | NM_021209 | NLRC4 | 7.82E-05    | CDS  |
| hsa-miR-1301-3p   | NM_021209 | NLRC4 | 3.55E-05    | CDS  |
| hsa-miR-1301-3p   | NM_021209 | NLRC4 | 0.01194815  | CDS  |
| hsa-miR-1185-5p   | NM_021209 | NLRC4 | 2.97E-05    | 5UTR |
| hsa-miR-1185-5p   | NM_021209 | NLRC4 | 8.85E-05    | CDS  |
| hsa-miR-449c-5p   | NM_021209 | NLRC4 | 9.79E-05    | CDS  |
| hsa-miR-449c-5p   | NM_021209 | NLRC4 | 5.17E-05    | CDS  |
| hsa-miR-449c-3p   | NM_021209 | NLRC4 | 0.000584143 | CDS  |
| hsa-miR-1283      | NM_021209 | NLRC4 | 0.002143507 | CDS  |
| hsa-miR-769-5p    | NM_021209 | NLRC4 | 0.000125663 | CDS  |
| hsa-miR-769-5p    | NM_021209 | NLRC4 | 0.01390878  | CDS  |
| hsa-miR-769-3p    | NM_021209 | NLRC4 | 1.96E-05    | CDS  |
| hsa-miR-769-3p    | NM_021209 | NLRC4 | 0.005273831 | CDS  |
| hsa-miR-766-5p    | NM_021209 | NLRC4 | 0.05611306  | CDS  |
| hsa-miR-766-3p    | NM_021209 | NLRC4 | 9.24E-06    | CDS  |
| hsa-miR-378d      | NM_021209 | NLRC4 | 0.003596187 | CDS  |
| hsa-miR-378d      | NM_021209 | NLRC4 | 0.01439129  | CDS  |
| hsa-miR-1185-1-3p | NM_021209 | NLRC4 | 0.000121323 | 5UTR |
| hsa-miR-1185-1-3p | NM_021209 | NLRC4 | 0.002677635 | CDS  |
| hsa-miR-762       | NM_021209 | NLRC4 | 3.17E-07    | CDS  |
| hsa-miR-802       | NM_021209 | NLRC4 | 0.001836158 | CDS  |

|                 |           |       |             |      |
|-----------------|-----------|-------|-------------|------|
| hsa-miR-670-5p  | NM_021209 | NLRC4 | 0.000133333 | CDS  |
| hsa-miR-670-5p  | NM_021209 | NLRC4 | 0.05124352  | CDS  |
| hsa-miR-1298-3p | NM_021209 | NLRC4 | 6.05E-07    | CDS  |
| hsa-miR-1298-3p | NM_021209 | NLRC4 | 0.2724825   | CDS  |
| hsa-miR-2113    | NM_021209 | NLRC4 | 0.02338689  | CDS  |
| hsa-miR-761     | NM_021209 | NLRC4 | 0.006362695 | CDS  |
| hsa-miR-764     | NM_021209 | NLRC4 | 0.001033441 | CDS  |
| hsa-miR-765     | NM_021209 | NLRC4 | 0.05383761  | CDS  |
| hsa-miR-765     | NM_021209 | NLRC4 | 0.001018132 | 5UTR |
| hsa-miR-675-5p  | NM_021209 | NLRC4 | 5.49E-05    | CDS  |
| hsa-miR-675-5p  | NM_021209 | NLRC4 | 0.000345859 | CDS  |
| hsa-miR-675-5p  | NM_021209 | NLRC4 | 0.01181189  | CDS  |
| hsa-miR-675-3p  | NM_021209 | NLRC4 | 0.009187106 | CDS  |
| hsa-miR-298     | NM_021209 | NLRC4 | 0.000147956 | CDS  |
| hsa-miR-891a-5p | NM_021209 | NLRC4 | 0.06961787  | CDS  |
| hsa-miR-891a-3p | NM_021209 | NLRC4 | 0.09383526  | CDS  |
| hsa-miR-300     | NM_021209 | NLRC4 | 0.03650309  | 5UTR |
| hsa-miR-892a    | NM_021209 | NLRC4 | 0.00329055  | CDS  |
| hsa-miR-892a    | NM_021209 | NLRC4 | 0.000972019 | CDS  |
| hsa-miR-450b-3p | NM_021209 | NLRC4 | 1.51E-05    | CDS  |
| hsa-miR-450b-3p | NM_021209 | NLRC4 | 0.000808708 | CDS  |
| hsa-miR-450b-3p | NM_021209 | NLRC4 | 1.35E-05    | CDS  |
| hsa-miR-874-5p  | NM_021209 | NLRC4 | 1.12E-05    | CDS  |
| hsa-miR-874-5p  | NM_021209 | NLRC4 | 0.002426029 | CDS  |
| hsa-miR-874-3p  | NM_021209 | NLRC4 | 4.84E-07    | CDS  |
| hsa-miR-888-5p  | NM_021209 | NLRC4 | 8.94E-05    | CDS  |
| hsa-miR-888-3p  | NM_021209 | NLRC4 | 0.000262096 | 5UTR |
| hsa-miR-888-3p  | NM_021209 | NLRC4 | 0.000802077 | CDS  |
| hsa-miR-892b    | NM_021209 | NLRC4 | 0.01837384  | CDS  |
| hsa-miR-541-5p  | NM_021209 | NLRC4 | 0.06759073  | CDS  |
| hsa-miR-541-5p  | NM_021209 | NLRC4 | 0.01507619  | CDS  |
| hsa-miR-541-3p  | NM_021209 | NLRC4 | 3.28E-05    | 5UTR |
| hsa-miR-889-5p  | NM_021209 | NLRC4 | 5.30E-07    | CDS  |
| hsa-miR-875-5p  | NM_021209 | NLRC4 | 2.31E-05    | CDS  |
| hsa-miR-875-3p  | NM_021209 | NLRC4 | 0.000388466 | CDS  |
| hsa-miR-876-5p  | NM_021209 | NLRC4 | 0.01472951  | CDS  |
| hsa-miR-876-5p  | NM_021209 | NLRC4 | 0.000324703 | CDS  |
| hsa-miR-708-5p  | NM_021209 | NLRC4 | 0.001633284 | CDS  |
| hsa-miR-708-5p  | NM_021209 | NLRC4 | 3.69E-06    | CDS  |
| hsa-miR-708-3p  | NM_021209 | NLRC4 | 0.000479692 | CDS  |
| hsa-miR-147b-5p | NM_021209 | NLRC4 | 0.002573208 | CDS  |
| hsa-miR-147b-3p | NM_021209 | NLRC4 | 9.72E-05    | CDS  |
| hsa-miR-744-5p  | NM_021209 | NLRC4 | 0.001670142 | CDS  |
| hsa-miR-744-5p  | NM_021209 | NLRC4 | 1.19E-06    | CDS  |

|                  |           |       |             |      |
|------------------|-----------|-------|-------------|------|
| hsa-miR-885-3p   | NM_021209 | NLRC4 | 0.00237631  | CDS  |
| hsa-miR-885-3p   | NM_021209 | NLRC4 | 0.000105297 | CDS  |
| hsa-miR-885-3p   | NM_021209 | NLRC4 | 0.00498711  | CDS  |
| hsa-miR-877-5p   | NM_021209 | NLRC4 | 0.01148179  | CDS  |
| hsa-miR-877-3p   | NM_021209 | NLRC4 | 0.000583201 | CDS  |
| hsa-miR-877-3p   | NM_021209 | NLRC4 | 0.05096433  | 5UTR |
| hsa-miR-877-3p   | NM_021209 | NLRC4 | 0.000475498 | CDS  |
| hsa-miR-887-5p   | NM_021209 | NLRC4 | 8.80E-06    | CDS  |
| hsa-miR-887-5p   | NM_021209 | NLRC4 | 0.001633284 | CDS  |
| hsa-miR-887-3p   | NM_021209 | NLRC4 | 9.29E-05    | CDS  |
| hsa-miR-665      | NM_021209 | NLRC4 | 0.000146875 | CDS  |
| hsa-miR-873-5p   | NM_021209 | NLRC4 | 0.003518183 | CDS  |
| hsa-miR-873-5p   | NM_021209 | NLRC4 | 0.000187515 | CDS  |
| hsa-miR-873-3p   | NM_021209 | NLRC4 | 0.01313369  | CDS  |
| hsa-miR-873-3p   | NM_021209 | NLRC4 | 0.02490019  | CDS  |
| hsa-miR-873-3p   | NM_021209 | NLRC4 | 0.005860441 | CDS  |
| hsa-miR-374b-3p  | NM_021209 | NLRC4 | 0.003455527 | CDS  |
| hsa-miR-374b-3p  | NM_021209 | NLRC4 | 0.003864711 | CDS  |
| hsa-miR-760      | NM_021209 | NLRC4 | 4.06E-07    | CDS  |
| hsa-miR-760      | NM_021209 | NLRC4 | 4.84E-07    | CDS  |
| hsa-miR-301b-5p  | NM_021209 | NLRC4 | 1.10E-08    | CDS  |
| hsa-miR-216b-3p  | NM_021209 | NLRC4 | 0.008364013 | CDS  |
| hsa-miR-920      | NM_021209 | NLRC4 | 0.001239845 | CDS  |
| hsa-miR-920      | NM_021209 | NLRC4 | 0.0264118   | CDS  |
| hsa-miR-921      | NM_021209 | NLRC4 | 0.001670037 | CDS  |
| hsa-miR-922      | NM_021209 | NLRC4 | 0.006362695 | CDS  |
| hsa-miR-924      | NM_021209 | NLRC4 | 5.47E-05    | CDS  |
| hsa-miR-924      | NM_021209 | NLRC4 | 0.002209893 | CDS  |
| hsa-miR-924      | NM_021209 | NLRC4 | 0.000598122 | CDS  |
| hsa-miR-509-3-5p | NM_021209 | NLRC4 | 1.23E-05    | CDS  |
| hsa-miR-509-3-5p | NM_021209 | NLRC4 | 0.000502803 | CDS  |
| hsa-miR-509-3-5p | NM_021209 | NLRC4 | 9.02E-06    | CDS  |
| hsa-miR-933      | NM_021209 | NLRC4 | 0.000603841 | 5UTR |
| hsa-miR-934      | NM_021209 | NLRC4 | 8.86E-07    | CDS  |
| hsa-miR-935      | NM_021209 | NLRC4 | 0.00021044  | 5UTR |
| hsa-miR-935      | NM_021209 | NLRC4 | 6.67E-05    | CDS  |
| hsa-miR-936      | NM_021209 | NLRC4 | 0.004898831 | CDS  |
| hsa-miR-937-5p   | NM_021209 | NLRC4 | 0.002220645 | 5UTR |
| hsa-miR-937-5p   | NM_021209 | NLRC4 | 0.003661642 | CDS  |
| hsa-miR-937-5p   | NM_021209 | NLRC4 | 6.02E-08    | CDS  |
| hsa-miR-938      | NM_021209 | NLRC4 | 0.001887768 | 5UTR |
| hsa-miR-939-5p   | NM_021209 | NLRC4 | 2.62E-05    | CDS  |
| hsa-miR-939-5p   | NM_021209 | NLRC4 | 0.000608953 | CDS  |
| hsa-miR-939-3p   | NM_021209 | NLRC4 | 7.16E-06    | CDS  |

|                 |           |       |             |      |
|-----------------|-----------|-------|-------------|------|
| hsa-miR-939-3p  | NM_021209 | NLRC4 | 0.00014298  | CDS  |
| hsa-miR-940     | NM_021209 | NLRC4 | 0.03853794  | 5UTR |
| hsa-miR-941     | NM_021209 | NLRC4 | 0.000347827 | CDS  |
| hsa-miR-941     | NM_021209 | NLRC4 | 4.19E-05    | CDS  |
| hsa-miR-942-5p  | NM_021209 | NLRC4 | 1.08E-05    | CDS  |
| hsa-miR-1178-5p | NM_021209 | NLRC4 | 0.000441636 | CDS  |
| hsa-miR-1178-3p | NM_021209 | NLRC4 | 0.003923357 | CDS  |
| hsa-miR-1178-3p | NM_021209 | NLRC4 | 0.05235348  | 5UTR |
| hsa-miR-1180-5p | NM_021209 | NLRC4 | 7.28E-06    | CDS  |
| hsa-miR-1181    | NM_021209 | NLRC4 | 5.97E-06    | CDS  |
| hsa-miR-1181    | NM_021209 | NLRC4 | 0.06641009  | CDS  |
| hsa-miR-1181    | NM_021209 | NLRC4 | 0.005613622 | CDS  |
| hsa-miR-1182    | NM_021209 | NLRC4 | 0.02261598  | CDS  |
| hsa-miR-1182    | NM_021209 | NLRC4 | 0.000671559 | CDS  |
| hsa-miR-1182    | NM_021209 | NLRC4 | 0.004035133 | CDS  |
| hsa-miR-1183    | NM_021209 | NLRC4 | 9.39E-05    | CDS  |
| hsa-miR-1183    | NM_021209 | NLRC4 | 2.57E-05    | CDS  |
| hsa-miR-1183    | NM_021209 | NLRC4 | 0.000566436 | CDS  |
| hsa-miR-1184    | NM_021209 | NLRC4 | 1.92E-05    | CDS  |
| hsa-miR-1225-5p | NM_021209 | NLRC4 | 0.000281735 | CDS  |
| hsa-miR-1225-3p | NM_021209 | NLRC4 | 0.02225154  | 5UTR |
| hsa-miR-1225-3p | NM_021209 | NLRC4 | 8.56E-06    | CDS  |
| hsa-miR-1226-5p | NM_021209 | NLRC4 | 0.000293001 | CDS  |
| hsa-miR-1226-3p | NM_021209 | NLRC4 | 0.006567177 | CDS  |
| hsa-miR-1227-5p | NM_021209 | NLRC4 | 2.28E-05    | CDS  |
| hsa-miR-1227-5p | NM_021209 | NLRC4 | 0.01108732  | CDS  |
| hsa-miR-1227-5p | NM_021209 | NLRC4 | 9.02E-05    | CDS  |
| hsa-miR-1227-5p | NM_021209 | NLRC4 | 5.97E-06    | CDS  |
| hsa-miR-1227-3p | NM_021209 | NLRC4 | 8.86E-07    | CDS  |
| hsa-miR-1227-3p | NM_021209 | NLRC4 | 0.000196593 | CDS  |
| hsa-miR-1228-5p | NM_021209 | NLRC4 | 0.000799382 | CDS  |
| hsa-miR-1228-5p | NM_021209 | NLRC4 | 0.002007726 | 5UTR |
| hsa-miR-1229-5p | NM_021209 | NLRC4 | 0.002220645 | 5UTR |
| hsa-miR-1229-5p | NM_021209 | NLRC4 | 1.00E-06    | CDS  |
| hsa-miR-1229-5p | NM_021209 | NLRC4 | 0.000133333 | CDS  |
| hsa-miR-1231    | NM_021209 | NLRC4 | 0.000799382 | CDS  |
| hsa-miR-1231    | NM_021209 | NLRC4 | 0.007684299 | CDS  |
| hsa-miR-1233-5p | NM_021209 | NLRC4 | 1.85E-05    | CDS  |
| hsa-miR-1233-5p | NM_021209 | NLRC4 | 4.98E-06    | CDS  |
| hsa-miR-1233-5p | NM_021209 | NLRC4 | 0.02230438  | CDS  |
| hsa-miR-1233-3p | NM_021209 | NLRC4 | 7.68E-06    | CDS  |
| hsa-miR-1233-3p | NM_021209 | NLRC4 | 1.53E-05    | CDS  |
| hsa-miR-1234-3p | NM_021209 | NLRC4 | 1.46E-05    | CDS  |
| hsa-miR-1236-5p | NM_021209 | NLRC4 | 0.000535509 | CDS  |

|                 |           |       |             |      |
|-----------------|-----------|-------|-------------|------|
| hsa-miR-1236-5p | NM_021209 | NLRC4 | 0.1613492   | CDS  |
| hsa-miR-1236-3p | NM_021209 | NLRC4 | 0.000259323 | CDS  |
| hsa-miR-1236-3p | NM_021209 | NLRC4 | 0.000475498 | CDS  |
| hsa-miR-1237-5p | NM_021209 | NLRC4 | 9.25E-07    | CDS  |
| hsa-miR-1237-5p | NM_021209 | NLRC4 | 1.33E-07    | CDS  |
| hsa-miR-1237-3p | NM_021209 | NLRC4 | 0.0210857   | CDS  |
| hsa-miR-1237-3p | NM_021209 | NLRC4 | 0.01276016  | CDS  |
| hsa-miR-1238-5p | NM_021209 | NLRC4 | 2.59E-05    | CDS  |
| hsa-miR-1200    | NM_021209 | NLRC4 | 0.01928178  | CDS  |
| hsa-miR-1202    | NM_021209 | NLRC4 | 6.57E-06    | CDS  |
| hsa-miR-1202    | NM_021209 | NLRC4 | 0.000671559 | CDS  |
| hsa-miR-1202    | NM_021209 | NLRC4 | 1.12E-05    | CDS  |
| hsa-miR-1203    | NM_021209 | NLRC4 | 0.001218159 | CDS  |
| hsa-miR-1203    | NM_021209 | NLRC4 | 4.98E-06    | CDS  |
| hsa-miR-1203    | NM_021209 | NLRC4 | 0.00210636  | CDS  |
| hsa-miR-663b    | NM_021209 | NLRC4 | 1.91E-05    | CDS  |
| hsa-miR-663b    | NM_021209 | NLRC4 | 5.47E-06    | CDS  |
| hsa-miR-663b    | NM_021209 | NLRC4 | 1.60E-06    | CDS  |
| hsa-miR-1204    | NM_021209 | NLRC4 | 1.16E-05    | CDS  |
| hsa-miR-1204    | NM_021209 | NLRC4 | 0.000511852 | CDS  |
| hsa-miR-1205    | NM_021209 | NLRC4 | 0.002435779 | CDS  |
| hsa-miR-1206    | NM_021209 | NLRC4 | 0.009066731 | CDS  |
| hsa-miR-1207-5p | NM_021209 | NLRC4 | 0.002365478 | CDS  |
| hsa-miR-1207-5p | NM_021209 | NLRC4 | 0.004040886 | 5UTR |
| hsa-miR-1207-5p | NM_021209 | NLRC4 | 1.85E-05    | CDS  |
| hsa-miR-1208    | NM_021209 | NLRC4 | 0.00011008  | CDS  |
| hsa-miR-1285-5p | NM_021209 | NLRC4 | 0.002434622 | CDS  |
| hsa-miR-1285-5p | NM_021209 | NLRC4 | 0.05384545  | CDS  |
| hsa-miR-1285-3p | NM_021209 | NLRC4 | 0.02595679  | CDS  |
| hsa-miR-1285-3p | NM_021209 | NLRC4 | 8.80E-06    | CDS  |
| hsa-miR-1285-3p | NM_021209 | NLRC4 | 0.004956985 | 5UTR |
| hsa-miR-1286    | NM_021209 | NLRC4 | 0.000496463 | CDS  |
| hsa-miR-1286    | NM_021209 | NLRC4 | 0.007362526 | CDS  |
| hsa-miR-1286    | NM_021209 | NLRC4 | 0.001014772 | CDS  |
| hsa-miR-1287-5p | NM_021209 | NLRC4 | 0.000308712 | CDS  |
| hsa-miR-1287-5p | NM_021209 | NLRC4 | 0.03853267  | CDS  |
| hsa-miR-1287-3p | NM_021209 | NLRC4 | 1.56E-05    | CDS  |
| hsa-miR-1287-3p | NM_021209 | NLRC4 | 2.94E-05    | CDS  |
| hsa-miR-1289    | NM_021209 | NLRC4 | 0.000478711 | CDS  |
| hsa-miR-1289    | NM_021209 | NLRC4 | 0.01176218  | CDS  |
| hsa-miR-1290    | NM_021209 | NLRC4 | 0.01767896  | CDS  |
| hsa-miR-1290    | NM_021209 | NLRC4 | 0.1541459   | CDS  |
| hsa-miR-1291    | NM_021209 | NLRC4 | 0.001025993 | CDS  |
| hsa-miR-1293    | NM_021209 | NLRC4 | 0.01861651  | CDS  |



|                 |           |       |             |      |
|-----------------|-----------|-------|-------------|------|
| hsa-miR-1294    | NM_021209 | NLRC4 | 8.35E-05    | CDS  |
| hsa-miR-1294    | NM_021209 | NLRC4 | 0.001710859 | CDS  |
| hsa-miR-1295a   | NM_021209 | NLRC4 | 0.01236446  | 5UTR |
| hsa-miR-1299    | NM_021209 | NLRC4 | 1.81E-05    | CDS  |
| hsa-miR-1299    | NM_021209 | NLRC4 | 0.04943221  | CDS  |
| hsa-miR-1303    | NM_021209 | NLRC4 | 0.000260618 | CDS  |
| hsa-miR-1303    | NM_021209 | NLRC4 | 0.000214933 | CDS  |
| hsa-miR-1304-5p | NM_021209 | NLRC4 | 5.56E-06    | CDS  |
| hsa-miR-1304-5p | NM_021209 | NLRC4 | 0.01135737  | CDS  |
| hsa-miR-1304-3p | NM_021209 | NLRC4 | 0.01501814  | CDS  |
| hsa-miR-1304-3p | NM_021209 | NLRC4 | 0.000107543 | CDS  |
| hsa-miR-1245a   | NM_021209 | NLRC4 | 0.000167343 | CDS  |
| hsa-miR-1246    | NM_021209 | NLRC4 | 0.1541459   | CDS  |
| hsa-miR-1246    | NM_021209 | NLRC4 | 0.142157    | CDS  |
| hsa-miR-1246    | NM_021209 | NLRC4 | 0.000724533 | CDS  |
| hsa-miR-1246    | NM_021209 | NLRC4 | 0.01767896  | CDS  |
| hsa-miR-1247-5p | NM_021209 | NLRC4 | 0.00013388  | CDS  |
| hsa-miR-1247-3p | NM_021209 | NLRC4 | 7.16E-06    | CDS  |
| hsa-miR-1248    | NM_021209 | NLRC4 | 0.000225565 | CDS  |
| hsa-miR-1249-5p | NM_021209 | NLRC4 | 0.05553747  | CDS  |
| hsa-miR-1250-5p | NM_021209 | NLRC4 | 0.006122178 | CDS  |
| hsa-miR-1250-3p | NM_021209 | NLRC4 | 4.89E-06    | CDS  |
| hsa-miR-1251-5p | NM_021209 | NLRC4 | 1.56E-05    | CDS  |
| hsa-miR-1253    | NM_021209 | NLRC4 | 0.001088706 | CDS  |
| hsa-miR-1257    | NM_021209 | NLRC4 | 0.000535509 | CDS  |
| hsa-miR-1261    | NM_021209 | NLRC4 | 0.000977407 | CDS  |
| hsa-miR-1261    | NM_021209 | NLRC4 | 0.02787945  | CDS  |
| hsa-miR-1263    | NM_021209 | NLRC4 | 0.001064408 | CDS  |
| hsa-miR-1265    | NM_021209 | NLRC4 | 0.08647864  | CDS  |
| hsa-miR-1265    | NM_021209 | NLRC4 | 0.009768947 | CDS  |
| hsa-miR-1266-5p | NM_021209 | NLRC4 | 0.000326334 | CDS  |
| hsa-miR-1266-5p | NM_021209 | NLRC4 | 4.59E-06    | CDS  |
| hsa-miR-1266-5p | NM_021209 | NLRC4 | 0.01083776  | 5UTR |
| hsa-miR-1266-3p | NM_021209 | NLRC4 | 0.02225154  | 5UTR |
| hsa-miR-1266-3p | NM_021209 | NLRC4 | 0.001456926 | CDS  |
| hsa-miR-1266-3p | NM_021209 | NLRC4 | 0.001083295 | CDS  |
| hsa-miR-1267    | NM_021209 | NLRC4 | 0.00014298  | CDS  |
| hsa-miR-1268a   | NM_021209 | NLRC4 | 0.001170791 | CDS  |
| hsa-miR-1269a   | NM_021209 | NLRC4 | 0.000238785 | CDS  |
| hsa-miR-1269a   | NM_021209 | NLRC4 | 0.003596187 | CDS  |
| hsa-miR-1269a   | NM_021209 | NLRC4 | 0.01439129  | CDS  |
| hsa-miR-1270    | NM_021209 | NLRC4 | 0.08822971  | CDS  |
| hsa-miR-1272    | NM_021209 | NLRC4 | 2.91E-05    | 5UTR |
| hsa-miR-1272    | NM_021209 | NLRC4 | 0.01064677  | CDS  |

|                    |           |       |             |      |
|--------------------|-----------|-------|-------------|------|
| hsa-miR-1275       | NM_021209 | NLRC4 | 0.01058857  | CDS  |
| hsa-miR-1276       | NM_021209 | NLRC4 | 3.78E-05    | CDS  |
| hsa-miR-1276       | NM_021209 | NLRC4 | 6.39E-05    | CDS  |
| hsa-miR-548i       | NM_021209 | NLRC4 | 0.0527194   | CDS  |
| hsa-miR-1281       | NM_021209 | NLRC4 | 0.003672413 | CDS  |
| hsa-miR-1288-5p    | NM_021209 | NLRC4 | 0.006232519 | CDS  |
| hsa-miR-1288-3p    | NM_021209 | NLRC4 | 2.45E-05    | 5UTR |
| hsa-miR-1288-3p    | NM_021209 | NLRC4 | 6.39E-05    | CDS  |
| hsa-miR-1292-5p    | NM_021209 | NLRC4 | 0.03090052  | CDS  |
| hsa-miR-1292-5p    | NM_021209 | NLRC4 | 4.03E-05    | CDS  |
| hsa-miR-1292-3p    | NM_021209 | NLRC4 | 8.36E-06    | CDS  |
| hsa-miR-1292-3p    | NM_021209 | NLRC4 | 1.22E-05    | CDS  |
| hsa-miR-1255b-5p   | NM_021209 | NLRC4 | 0.000407782 | CDS  |
| hsa-miR-1255b-2-3p | NM_021209 | NLRC4 | 2.79E-05    | CDS  |
| hsa-miR-664a-5p    | NM_021209 | NLRC4 | 0.06091269  | CDS  |
| hsa-miR-664a-5p    | NM_021209 | NLRC4 | 0.008742791 | CDS  |
| hsa-miR-1306-5p    | NM_021209 | NLRC4 | 1.60E-05    | CDS  |
| hsa-miR-1306-5p    | NM_021209 | NLRC4 | 4.84E-07    | CDS  |
| hsa-miR-1306-3p    | NM_021209 | NLRC4 | 1.53E-05    | CDS  |
| hsa-miR-1307-5p    | NM_021209 | NLRC4 | 6.00E-05    | CDS  |
| hsa-miR-1307-3p    | NM_021209 | NLRC4 | 3.70E-07    | CDS  |
| hsa-miR-1307-3p    | NM_021209 | NLRC4 | 0.001218159 | CDS  |
| hsa-miR-1307-3p    | NM_021209 | NLRC4 | 2.57E-05    | CDS  |
| hsa-miR-513b-3p    | NM_021209 | NLRC4 | 0.000552817 | CDS  |
| hsa-miR-513c-5p    | NM_021209 | NLRC4 | 0.01318848  | CDS  |
| hsa-miR-513c-5p    | NM_021209 | NLRC4 | 3.04E-05    | CDS  |
| hsa-miR-513c-3p    | NM_021209 | NLRC4 | 0.001300536 | 5UTR |
| hsa-miR-1321       | NM_021209 | NLRC4 | 4.03E-06    | CDS  |
| hsa-miR-1322       | NM_021209 | NLRC4 | 0.02853091  | CDS  |
| hsa-miR-1322       | NM_021209 | NLRC4 | 2.91E-05    | 5UTR |
| hsa-miR-1197       | NM_021209 | NLRC4 | 0.02256466  | 5UTR |
| hsa-miR-1469       | NM_021209 | NLRC4 | 0.001035763 | CDS  |
| hsa-miR-1469       | NM_021209 | NLRC4 | 0.01195042  | CDS  |
| hsa-miR-1470       | NM_021209 | NLRC4 | 7.76E-05    | CDS  |
| hsa-miR-1470       | NM_021209 | NLRC4 | 2.98E-05    | CDS  |
| hsa-miR-1471       | NM_021209 | NLRC4 | 0.000159806 | CDS  |
| hsa-miR-1471       | NM_021209 | NLRC4 | 0.000251763 | CDS  |
| hsa-miR-1471       | NM_021209 | NLRC4 | 6.96E-05    | CDS  |
| hsa-miR-1538       | NM_021209 | NLRC4 | 4.84E-07    | CDS  |
| hsa-miR-1538       | NM_021209 | NLRC4 | 6.98E-06    | CDS  |
| hsa-miR-1538       | NM_021209 | NLRC4 | 1.46E-05    | CDS  |
| hsa-miR-1539       | NM_021209 | NLRC4 | 6.33E-06    | CDS  |
| hsa-miR-1539       | NM_021209 | NLRC4 | 0.00027781  | CDS  |
| hsa-miR-1539       | NM_021209 | NLRC4 | 4.54E-05    | CDS  |

|                 |           |       |             |      |
|-----------------|-----------|-------|-------------|------|
| hsa-miR-103b    | NM_021209 | NLRC4 | 4.02E-07    | CDS  |
| hsa-miR-1825    | NM_021209 | NLRC4 | 0.000477204 | CDS  |
| hsa-miR-1908-5p | NM_021209 | NLRC4 | 0.004002253 | 5UTR |
| hsa-miR-1908-5p | NM_021209 | NLRC4 | 5.03E-05    | 5UTR |
| hsa-miR-1908-5p | NM_021209 | NLRC4 | 0.0268879   | CDS  |
| hsa-miR-1908-3p | NM_021209 | NLRC4 | 0.001172201 | CDS  |
| hsa-miR-1908-3p | NM_021209 | NLRC4 | 8.09E-06    | CDS  |
| hsa-miR-1908-3p | NM_021209 | NLRC4 | 5.14E-05    | CDS  |
| hsa-miR-1909-5p | NM_021209 | NLRC4 | 0.002564212 | CDS  |
| hsa-miR-1909-5p | NM_021209 | NLRC4 | 0.000285798 | CDS  |
| hsa-miR-1909-3p | NM_021209 | NLRC4 | 0.006396492 | CDS  |
| hsa-miR-1910-5p | NM_021209 | NLRC4 | 0.006567177 | CDS  |
| hsa-miR-1910-3p | NM_021209 | NLRC4 | 0.004462303 | CDS  |
| hsa-miR-1911-5p | NM_021209 | NLRC4 | 1.88E-05    | CDS  |
| hsa-miR-1911-5p | NM_021209 | NLRC4 | 0.000379918 | CDS  |
| hsa-miR-1911-3p | NM_021209 | NLRC4 | 0.001170791 | CDS  |
| hsa-miR-1912-3p | NM_021209 | NLRC4 | 3.78E-05    | CDS  |
| hsa-miR-1912-3p | NM_021209 | NLRC4 | 3.70E-07    | CDS  |
| hsa-miR-1913    | NM_021209 | NLRC4 | 0.01223285  | CDS  |
| hsa-miR-1913    | NM_021209 | NLRC4 | 0.003672413 | CDS  |
| hsa-miR-1914-5p | NM_021209 | NLRC4 | 0.02225154  | 5UTR |
| hsa-miR-1914-3p | NM_021209 | NLRC4 | 0.001014646 | CDS  |
| hsa-miR-1915-5p | NM_021209 | NLRC4 | 4.54E-05    | CDS  |
| hsa-miR-1915-5p | NM_021209 | NLRC4 | 1.82E-06    | CDS  |
| hsa-miR-1915-5p | NM_021209 | NLRC4 | 0.000326687 | CDS  |
| hsa-miR-1915-3p | NM_021209 | NLRC4 | 2.23E-07    | CDS  |
| hsa-miR-1915-3p | NM_021209 | NLRC4 | 1.23E-05    | CDS  |
| hsa-miR-1915-3p | NM_021209 | NLRC4 | 6.23E-05    | 5UTR |
| hsa-miR-1972    | NM_021209 | NLRC4 | 0.001447161 | CDS  |
| hsa-miR-1972    | NM_021209 | NLRC4 | 1.16E-05    | CDS  |
| hsa-miR-1976    | NM_021209 | NLRC4 | 6.44E-07    | CDS  |
| hsa-miR-1976    | NM_021209 | NLRC4 | 0.000244245 | CDS  |
| hsa-miR-2110    | NM_021209 | NLRC4 | 5.56E-06    | CDS  |
| hsa-miR-2110    | NM_021209 | NLRC4 | 6.26E-05    | CDS  |
| hsa-miR-2114-5p | NM_021209 | NLRC4 | 0.001172201 | CDS  |
| hsa-miR-2114-5p | NM_021209 | NLRC4 | 0.004018656 | CDS  |
| hsa-miR-2114-3p | NM_021209 | NLRC4 | 7.36E-06    | CDS  |
| hsa-miR-2114-3p | NM_021209 | NLRC4 | 4.14E-05    | CDS  |
| hsa-miR-2115-5p | NM_021209 | NLRC4 | 3.88E-05    | CDS  |
| hsa-miR-2115-3p | NM_021209 | NLRC4 | 0.01648264  | CDS  |
| hsa-miR-2115-3p | NM_021209 | NLRC4 | 0.001205514 | CDS  |
| hsa-miR-2116-5p | NM_021209 | NLRC4 | 4.06E-07    | CDS  |
| hsa-miR-2116-3p | NM_021209 | NLRC4 | 0.000245493 | CDS  |
| hsa-miR-548q    | NM_021209 | NLRC4 | 0.02227046  | CDS  |

|                 |           |       |             |      |
|-----------------|-----------|-------|-------------|------|
| hsa-miR-2276-5p | NM_021209 | NLRC4 | 8.27E-06    | CDS  |
| hsa-miR-2276-3p | NM_021209 | NLRC4 | 6.54E-06    | CDS  |
| hsa-miR-2277-5p | NM_021209 | NLRC4 | 0.000479692 | CDS  |
| hsa-miR-2277-5p | NM_021209 | NLRC4 | 0.001033441 | CDS  |
| hsa-miR-2277-5p | NM_021209 | NLRC4 | 1.00E-06    | CDS  |
| hsa-miR-2277-3p | NM_021209 | NLRC4 | 1.48E-05    | CDS  |
| hsa-miR-2277-3p | NM_021209 | NLRC4 | 0.000108131 | CDS  |
| hsa-miR-2277-3p | NM_021209 | NLRC4 | 8.09E-06    | CDS  |
| hsa-miR-2278    | NM_021209 | NLRC4 | 0.005224415 | CDS  |
| hsa-miR-2681-5p | NM_021209 | NLRC4 | 0.000239915 | CDS  |
| hsa-miR-2681-5p | NM_021209 | NLRC4 | 0.000802077 | CDS  |
| hsa-miR-2681-3p | NM_021209 | NLRC4 | 0.04156789  | CDS  |
| hsa-miR-2682-5p | NM_021209 | NLRC4 | 0.003518762 | CDS  |
| hsa-miR-2682-5p | NM_021209 | NLRC4 | 9.54E-06    | CDS  |
| hsa-miR-2682-3p | NM_021209 | NLRC4 | 2.92E-05    | CDS  |
| hsa-miR-2682-3p | NM_021209 | NLRC4 | 7.69E-06    | CDS  |
| hsa-miR-2682-3p | NM_021209 | NLRC4 | 4.71E-07    | CDS  |
| hsa-miR-711     | NM_021209 | NLRC4 | 0.000671559 | CDS  |
| hsa-miR-711     | NM_021209 | NLRC4 | 0.000407782 | CDS  |
| hsa-miR-718     | NM_021209 | NLRC4 | 1.34E-05    | 5UTR |
| hsa-miR-718     | NM_021209 | NLRC4 | 2.98E-05    | CDS  |
| hsa-miR-2861    | NM_021209 | NLRC4 | 7.19E-05    | CDS  |
| hsa-miR-2861    | NM_021209 | NLRC4 | 0.01176218  | CDS  |
| hsa-miR-2861    | NM_021209 | NLRC4 | 9.02E-05    | CDS  |
| hsa-miR-2909    | NM_021209 | NLRC4 | 0.001027397 | CDS  |
| hsa-miR-3117-3p | NM_021209 | NLRC4 | 0.000281957 | CDS  |
| hsa-miR-3119    | NM_021209 | NLRC4 | 0.00116715  | CDS  |
| hsa-miR-3120-5p | NM_021209 | NLRC4 | 5.86E-06    | CDS  |
| hsa-miR-3120-5p | NM_021209 | NLRC4 | 0.002171061 | CDS  |
| hsa-miR-3120-3p | NM_021209 | NLRC4 | 9.39E-05    | CDS  |
| hsa-miR-3121-5p | NM_021209 | NLRC4 | 2.34E-05    | CDS  |
| hsa-miR-3122    | NM_021209 | NLRC4 | 0.01730902  | CDS  |
| hsa-miR-3124-5p | NM_021209 | NLRC4 | 0.004769708 | CDS  |
| hsa-miR-3124-3p | NM_021209 | NLRC4 | 0.01276016  | CDS  |
| hsa-miR-3124-3p | NM_021209 | NLRC4 | 0.02111429  | CDS  |
| hsa-miR-3126-5p | NM_021209 | NLRC4 | 0.001764953 | 5UTR |
| hsa-miR-3126-3p | NM_021209 | NLRC4 | 0.004956985 | 5UTR |
| hsa-miR-3126-3p | NM_021209 | NLRC4 | 4.19E-05    | CDS  |
| hsa-miR-3126-3p | NM_021209 | NLRC4 | 1.47E-05    | CDS  |
| hsa-miR-3127-5p | NM_021209 | NLRC4 | 0.006385549 | CDS  |
| hsa-miR-3127-3p | NM_021209 | NLRC4 | 0.006055493 | CDS  |
| hsa-miR-3127-3p | NM_021209 | NLRC4 | 0.000542111 | CDS  |
| hsa-miR-3129-5p | NM_021209 | NLRC4 | 0.01148179  | CDS  |
| hsa-miR-3130-5p | NM_021209 | NLRC4 | 6.15E-05    | CDS  |

|                  |           |       |             |      |
|------------------|-----------|-------|-------------|------|
| hsa-miR-3130-5p  | NM_021209 | NLRC4 | 1.83E-05    | CDS  |
| hsa-miR-3130-5p  | NM_021209 | NLRC4 | 8.94E-05    | CDS  |
| hsa-miR-3130-3p  | NM_021209 | NLRC4 | 0.0101559   | CDS  |
| hsa-miR-3131     | NM_021209 | NLRC4 | 0.000598122 | CDS  |
| hsa-miR-3132     | NM_021209 | NLRC4 | 0.03129093  | CDS  |
| hsa-miR-3135a    | NM_021209 | NLRC4 | 8.94E-05    | CDS  |
| hsa-miR-3135a    | NM_021209 | NLRC4 | 0.001564598 | CDS  |
| hsa-miR-3136-5p  | NM_021209 | NLRC4 | 0.003230363 | 5UTR |
| hsa-miR-3136-3p  | NM_021209 | NLRC4 | 0.00503807  | CDS  |
| hsa-miR-544b     | NM_021209 | NLRC4 | 8.35E-05    | CDS  |
| hsa-miR-544b     | NM_021209 | NLRC4 | 8.80E-06    | CDS  |
| hsa-miR-3137     | NM_021209 | NLRC4 | 5.45E-06    | CDS  |
| hsa-miR-3137     | NM_021209 | NLRC4 | 0.000150393 | CDS  |
| hsa-miR-3138     | NM_021209 | NLRC4 | 0.000502803 | CDS  |
| hsa-miR-3138     | NM_021209 | NLRC4 | 0.003450568 | CDS  |
| hsa-miR-3140-5p  | NM_021209 | NLRC4 | 0.01801811  | CDS  |
| hsa-miR-3140-3p  | NM_021209 | NLRC4 | 6.20E-05    | CDS  |
| hsa-miR-3140-3p  | NM_021209 | NLRC4 | 2.88E-05    | CDS  |
| hsa-miR-3141     | NM_021209 | NLRC4 | 0.000671559 | CDS  |
| hsa-miR-3141     | NM_021209 | NLRC4 | 0.000605168 | CDS  |
| hsa-miR-3141     | NM_021209 | NLRC4 | 0.000642323 | CDS  |
| hsa-miR-3142     | NM_021209 | NLRC4 | 3.04E-06    | CDS  |
| hsa-miR-3144-5p  | NM_021209 | NLRC4 | 0.005514936 | CDS  |
| hsa-miR-3147     | NM_021209 | NLRC4 | 0.1399983   | CDS  |
| hsa-miR-3147     | NM_021209 | NLRC4 | 0.01054983  | CDS  |
| hsa-miR-3147     | NM_021209 | NLRC4 | 1.00E-06    | CDS  |
| hsa-miR-3147     | NM_021209 | NLRC4 | 4.47E-06    | CDS  |
| hsa-miR-548v     | NM_021209 | NLRC4 | 0.000812999 | CDS  |
| hsa-miR-3148     | NM_021209 | NLRC4 | 6.98E-06    | CDS  |
| hsa-miR-3148     | NM_021209 | NLRC4 | 0.03211739  | CDS  |
| hsa-miR-3150a-3p | NM_021209 | NLRC4 | 3.28E-05    | 5UTR |
| hsa-miR-3150a-3p | NM_021209 | NLRC4 | 1.24E-05    | CDS  |
| hsa-miR-3151-5p  | NM_021209 | NLRC4 | 0.02559255  | 5UTR |
| hsa-miR-3152-3p  | NM_021209 | NLRC4 | 0.01289354  | CDS  |
| hsa-miR-3153     | NM_021209 | NLRC4 | 0.000605168 | CDS  |
| hsa-miR-3074-5p  | NM_021209 | NLRC4 | 0.01928178  | CDS  |
| hsa-miR-3154     | NM_021209 | NLRC4 | 0.000956925 | CDS  |
| hsa-miR-3154     | NM_021209 | NLRC4 | 0.01542657  | CDS  |
| hsa-miR-3155a    | NM_021209 | NLRC4 | 6.15E-05    | CDS  |
| hsa-miR-3156-3p  | NM_021209 | NLRC4 | 2.98E-05    | CDS  |
| hsa-miR-3156-3p  | NM_021209 | NLRC4 | 0.002940157 | CDS  |
| hsa-miR-3157-5p  | NM_021209 | NLRC4 | 1.56E-05    | CDS  |
| hsa-miR-3157-3p  | NM_021209 | NLRC4 | 4.84E-07    | CDS  |
| hsa-miR-3157-3p  | NM_021209 | NLRC4 | 8.27E-06    | CDS  |

|                 |           |       |             |      |
|-----------------|-----------|-------|-------------|------|
| hsa-miR-3157-3p | NM_021209 | NLRC4 | 0.000140506 | CDS  |
| hsa-miR-3158-5p | NM_021209 | NLRC4 | 7.28E-05    | CDS  |
| hsa-miR-3158-5p | NM_021209 | NLRC4 | 6.97E-06    | CDS  |
| hsa-miR-3158-3p | NM_021209 | NLRC4 | 4.47E-06    | CDS  |
| hsa-miR-3158-3p | NM_021209 | NLRC4 | 0.003328804 | 5UTR |
| hsa-miR-3158-3p | NM_021209 | NLRC4 | 0.002580033 | CDS  |
| hsa-miR-3158-3p | NM_021209 | NLRC4 | 1.24E-05    | CDS  |
| hsa-miR-3159    | NM_021209 | NLRC4 | 0.01001738  | CDS  |
| hsa-miR-3160-5p | NM_021209 | NLRC4 | 1.47E-05    | CDS  |
| hsa-miR-3160-5p | NM_021209 | NLRC4 | 0.000646339 | CDS  |
| hsa-miR-3160-5p | NM_021209 | NLRC4 | 0.002426029 | CDS  |
| hsa-miR-3161    | NM_021209 | NLRC4 | 0.000785087 | CDS  |
| hsa-miR-3162-5p | NM_021209 | NLRC4 | 0.1988711   | CDS  |
| hsa-miR-3162-5p | NM_021209 | NLRC4 | 0.002744245 | 5UTR |
| hsa-miR-3163    | NM_021209 | NLRC4 | 0.009993837 | CDS  |
| hsa-miR-3164    | NM_021209 | NLRC4 | 0.04495882  | CDS  |
| hsa-miR-3165    | NM_021209 | NLRC4 | 0.05016788  | CDS  |
| hsa-miR-3165    | NM_021209 | NLRC4 | 0.003719112 | 5UTR |
| hsa-miR-3165    | NM_021209 | NLRC4 | 0.01194815  | CDS  |
| hsa-miR-3168    | NM_021209 | NLRC4 | 0.004851312 | 5UTR |
| hsa-miR-3169    | NM_021209 | NLRC4 | 7.06E-05    | CDS  |
| hsa-miR-3170    | NM_021209 | NLRC4 | 1.46E-05    | CDS  |
| hsa-miR-3173-5p | NM_021209 | NLRC4 | 0.004730357 | CDS  |
| hsa-miR-3173-5p | NM_021209 | NLRC4 | 0.03271231  | CDS  |
| hsa-miR-3173-3p | NM_021209 | NLRC4 | 3.78E-05    | CDS  |
| hsa-miR-1193    | NM_021209 | NLRC4 | 1.26E-05    | 5UTR |
| hsa-miR-1193    | NM_021209 | NLRC4 | 0.005224415 | CDS  |
| hsa-miR-323b-5p | NM_021209 | NLRC4 | 0.02250464  | CDS  |
| hsa-miR-3174    | NM_021209 | NLRC4 | 0.000365711 | CDS  |
| hsa-miR-3175    | NM_021209 | NLRC4 | 8.64E-05    | CDS  |
| hsa-miR-3175    | NM_021209 | NLRC4 | 0.000956925 | CDS  |
| hsa-miR-3176    | NM_021209 | NLRC4 | 0.01623033  | CDS  |
| hsa-miR-3177-3p | NM_021209 | NLRC4 | 0.000603841 | 5UTR |
| hsa-miR-3178    | NM_021209 | NLRC4 | 5.97E-06    | CDS  |
| hsa-miR-3178    | NM_021209 | NLRC4 | 2.75E-05    | 5UTR |
| hsa-miR-3180-5p | NM_021209 | NLRC4 | 1.21E-05    | CDS  |
| hsa-miR-3180-5p | NM_021209 | NLRC4 | 5.25E-05    | CDS  |
| hsa-miR-3180-3p | NM_021209 | NLRC4 | 0.002815688 | CDS  |
| hsa-miR-3181    | NM_021209 | NLRC4 | 6.65E-06    | CDS  |
| hsa-miR-3183    | NM_021209 | NLRC4 | 2.59E-05    | CDS  |
| hsa-miR-3183    | NM_021209 | NLRC4 | 0.000285464 | 5UTR |
| hsa-miR-3184-5p | NM_021209 | NLRC4 | 2.28E-05    | CDS  |
| hsa-miR-3184-3p | NM_021209 | NLRC4 | 0.001050863 | CDS  |
| hsa-miR-3184-3p | NM_021209 | NLRC4 | 0.00037471  | CDS  |

|                 |           |       |             |      |
|-----------------|-----------|-------|-------------|------|
| hsa-miR-3184-3p | NM_021209 | NLRC4 | 0.000137416 | CDS  |
| hsa-miR-3185    | NM_021209 | NLRC4 | 0.01250097  | CDS  |
| hsa-miR-3185    | NM_021209 | NLRC4 | 2.11E-05    | CDS  |
| hsa-miR-3065-3p | NM_021209 | NLRC4 | 0.01519719  | CDS  |
| hsa-miR-3065-3p | NM_021209 | NLRC4 | 6.71E-05    | 5UTR |
| hsa-miR-3065-3p | NM_021209 | NLRC4 | 1.19E-05    | CDS  |
| hsa-miR-3065-3p | NM_021209 | NLRC4 | 1.07E-05    | CDS  |
| hsa-miR-3186-5p | NM_021209 | NLRC4 | 0.000441636 | CDS  |
| hsa-miR-3186-3p | NM_021209 | NLRC4 | 0.001972862 | CDS  |
| hsa-miR-3186-3p | NM_021209 | NLRC4 | 0.006569541 | CDS  |
| hsa-miR-3186-3p | NM_021209 | NLRC4 | 0.005620409 | CDS  |
| hsa-miR-3187-5p | NM_021209 | NLRC4 | 3.70E-07    | CDS  |
| hsa-miR-3187-3p | NM_021209 | NLRC4 | 0.001503355 | CDS  |
| hsa-miR-3187-3p | NM_021209 | NLRC4 | 0.01732928  | CDS  |
| hsa-miR-3188    | NM_021209 | NLRC4 | 0.001026694 | 5UTR |
| hsa-miR-3188    | NM_021209 | NLRC4 | 5.97E-06    | CDS  |
| hsa-miR-3188    | NM_021209 | NLRC4 | 0.000926972 | CDS  |
| hsa-miR-3189-5p | NM_021209 | NLRC4 | 0.000159806 | CDS  |
| hsa-miR-3189-3p | NM_021209 | NLRC4 | 7.16E-06    | CDS  |
| hsa-miR-3189-3p | NM_021209 | NLRC4 | 2.06E-05    | CDS  |
| hsa-miR-3189-3p | NM_021209 | NLRC4 | 0.000137813 | CDS  |
| hsa-miR-3190-5p | NM_021209 | NLRC4 | 0.06961787  | CDS  |
| hsa-miR-3190-5p | NM_021209 | NLRC4 | 2.34E-05    | CDS  |
| hsa-miR-3190-5p | NM_021209 | NLRC4 | 5.56E-06    | CDS  |
| hsa-miR-3190-3p | NM_021209 | NLRC4 | 0.000671587 | 5UTR |
| hsa-miR-3190-3p | NM_021209 | NLRC4 | 0.001218159 | CDS  |
| hsa-miR-3190-3p | NM_021209 | NLRC4 | 0.08798883  | CDS  |
| hsa-miR-3191-5p | NM_021209 | NLRC4 | 0.000225565 | CDS  |
| hsa-miR-3191-3p | NM_021209 | NLRC4 | 3.28E-05    | 5UTR |
| hsa-miR-3192-5p | NM_021209 | NLRC4 | 1.23E-05    | CDS  |
| hsa-miR-3192-5p | NM_021209 | NLRC4 | 0.004956985 | 5UTR |
| hsa-miR-3192-5p | NM_021209 | NLRC4 | 0.00210636  | CDS  |
| hsa-miR-3192-3p | NM_021209 | NLRC4 | 0.01223285  | CDS  |
| hsa-miR-3192-3p | NM_021209 | NLRC4 | 6.65E-06    | CDS  |
| hsa-miR-3193    | NM_021209 | NLRC4 | 0.006055493 | CDS  |
| hsa-miR-3193    | NM_021209 | NLRC4 | 0.008213843 | CDS  |
| hsa-miR-3194-5p | NM_021209 | NLRC4 | 7.51E-05    | CDS  |
| hsa-miR-3194-5p | NM_021209 | NLRC4 | 4.06E-07    | CDS  |
| hsa-miR-3194-3p | NM_021209 | NLRC4 | 2.94E-05    | CDS  |
| hsa-miR-3194-3p | NM_021209 | NLRC4 | 4.02E-06    | CDS  |
| hsa-miR-3194-3p | NM_021209 | NLRC4 | 7.76E-05    | CDS  |
| hsa-miR-3195    | NM_021209 | NLRC4 | 6.05E-07    | CDS  |
| hsa-miR-3196    | NM_021209 | NLRC4 | 3.17E-07    | CDS  |
| hsa-miR-3197    | NM_021209 | NLRC4 | 0.000161338 | CDS  |

|                 |           |       |             |      |
|-----------------|-----------|-------|-------------|------|
| hsa-miR-3197    | NM_021209 | NLRC4 | 0.001135043 | CDS  |
| hsa-miR-3198    | NM_021209 | NLRC4 | 9.56E-06    | CDS  |
| hsa-miR-3198    | NM_021209 | NLRC4 | 5.03E-05    | CDS  |
| hsa-miR-3198    | NM_021209 | NLRC4 | 0.000297589 | CDS  |
| hsa-miR-3200-5p | NM_021209 | NLRC4 | 0.006869599 | CDS  |
| hsa-miR-3200-3p | NM_021209 | NLRC4 | 4.54E-05    | CDS  |
| hsa-miR-514b-5p | NM_021209 | NLRC4 | 3.04E-05    | CDS  |
| hsa-miR-514b-5p | NM_021209 | NLRC4 | 0.01318848  | CDS  |
| hsa-miR-514b-3p | NM_021209 | NLRC4 | 2.21E-05    | 5UTR |
| hsa-miR-3202    | NM_021209 | NLRC4 | 0.000626821 | CDS  |
| hsa-miR-3202    | NM_021209 | NLRC4 | 0.02468582  | CDS  |
| hsa-miR-3202    | NM_021209 | NLRC4 | 0.05383761  | CDS  |
| hsa-miR-4296    | NM_021209 | NLRC4 | 0.000248928 | CDS  |
| hsa-miR-4296    | NM_021209 | NLRC4 | 0.005126806 | CDS  |
| hsa-miR-378c    | NM_021209 | NLRC4 | 0.000228869 | CDS  |
| hsa-miR-4293    | NM_021209 | NLRC4 | 1.05E-05    | CDS  |
| hsa-miR-4294    | NM_021209 | NLRC4 | 0.001633284 | CDS  |
| hsa-miR-4299    | NM_021209 | NLRC4 | 0.01623033  | CDS  |
| hsa-miR-4299    | NM_021209 | NLRC4 | 4.36E-05    | CDS  |
| hsa-miR-4298    | NM_021209 | NLRC4 | 0.02675239  | CDS  |
| hsa-miR-4298    | NM_021209 | NLRC4 | 0.000502803 | CDS  |
| hsa-miR-4304    | NM_021209 | NLRC4 | 4.54E-05    | CDS  |
| hsa-miR-4304    | NM_021209 | NLRC4 | 0.0294755   | CDS  |
| hsa-miR-4304    | NM_021209 | NLRC4 | 4.98E-06    | CDS  |
| hsa-miR-4304    | NM_021209 | NLRC4 | 1.33E-07    | CDS  |
| hsa-miR-4302    | NM_021209 | NLRC4 | 0.000778346 | CDS  |
| hsa-miR-4302    | NM_021209 | NLRC4 | 0.09125359  | CDS  |
| hsa-miR-4303    | NM_021209 | NLRC4 | 0.08531005  | CDS  |
| hsa-miR-4303    | NM_021209 | NLRC4 | 0.001027397 | CDS  |
| hsa-miR-4306    | NM_021209 | NLRC4 | 0.02468582  | CDS  |
| hsa-miR-4309    | NM_021209 | NLRC4 | 0.00013214  | CDS  |
| hsa-miR-4309    | NM_021209 | NLRC4 | 1.16E-05    | CDS  |
| hsa-miR-4308    | NM_021209 | NLRC4 | 0.003473051 | CDS  |
| hsa-miR-4308    | NM_021209 | NLRC4 | 0.001218159 | CDS  |
| hsa-miR-4310    | NM_021209 | NLRC4 | 6.41E-06    | CDS  |
| hsa-miR-4311    | NM_021209 | NLRC4 | 0.03337992  | CDS  |
| hsa-miR-4311    | NM_021209 | NLRC4 | 0.000654256 | CDS  |
| hsa-miR-4312    | NM_021209 | NLRC4 | 0.00037471  | CDS  |
| hsa-miR-4312    | NM_021209 | NLRC4 | 0.000646339 | CDS  |
| hsa-miR-4312    | NM_021209 | NLRC4 | 0.000125663 | CDS  |
| hsa-miR-4313    | NM_021209 | NLRC4 | 1.60E-06    | CDS  |
| hsa-miR-4315    | NM_021209 | NLRC4 | 0.000582754 | CDS  |
| hsa-miR-4315    | NM_021209 | NLRC4 | 0.002083594 | CDS  |
| hsa-miR-4316    | NM_021209 | NLRC4 | 0.009044755 | CDS  |



|                 |           |       |             |      |
|-----------------|-----------|-------|-------------|------|
| hsa-miR-4316    | NM_021209 | NLRC4 | 3.99E-05    | CDS  |
| hsa-miR-4314    | NM_021209 | NLRC4 | 0.001185525 | CDS  |
| hsa-miR-4314    | NM_021209 | NLRC4 | 7.16E-06    | CDS  |
| hsa-miR-4318    | NM_021209 | NLRC4 | 6.05E-07    | CDS  |
| hsa-miR-4318    | NM_021209 | NLRC4 | 0.04671732  | CDS  |
| hsa-miR-4320    | NM_021209 | NLRC4 | 0.002224226 | CDS  |
| hsa-miR-4320    | NM_021209 | NLRC4 | 1.86E-05    | CDS  |
| hsa-miR-4322    | NM_021209 | NLRC4 | 1.85E-06    | CDS  |
| hsa-miR-4322    | NM_021209 | NLRC4 | 7.16E-06    | CDS  |
| hsa-miR-4322    | NM_021209 | NLRC4 | 4.98E-06    | CDS  |
| hsa-miR-4322    | NM_021209 | NLRC4 | 2.98E-05    | CDS  |
| hsa-miR-4321    | NM_021209 | NLRC4 | 6.67E-05    | CDS  |
| hsa-miR-4321    | NM_021209 | NLRC4 | 5.44E-05    | 5UTR |
| hsa-miR-4321    | NM_021209 | NLRC4 | 0.000406814 | CDS  |
| hsa-miR-4321    | NM_021209 | NLRC4 | 0.004898831 | CDS  |
| hsa-miR-4257    | NM_021209 | NLRC4 | 0.009044755 | CDS  |
| hsa-miR-4259    | NM_021209 | NLRC4 | 0.000956925 | CDS  |
| hsa-miR-4259    | NM_021209 | NLRC4 | 0.000953849 | CDS  |
| hsa-miR-4259    | NM_021209 | NLRC4 | 0.08150963  | CDS  |
| hsa-miR-4260    | NM_021209 | NLRC4 | 0.000158814 | CDS  |
| hsa-miR-4253    | NM_021209 | NLRC4 | 0.005727952 | 5UTR |
| hsa-miR-4253    | NM_021209 | NLRC4 | 0.004123571 | CDS  |
| hsa-miR-4254    | NM_021209 | NLRC4 | 2.92E-05    | CDS  |
| hsa-miR-4254    | NM_021209 | NLRC4 | 1.35E-05    | CDS  |
| hsa-miR-4254    | NM_021209 | NLRC4 | 0.000233119 | 5UTR |
| hsa-miR-4252    | NM_021209 | NLRC4 | 0.003190413 | CDS  |
| hsa-miR-4326    | NM_021209 | NLRC4 | 0.03262098  | 5UTR |
| hsa-miR-4327    | NM_021209 | NLRC4 | 2.04E-05    | CDS  |
| hsa-miR-4327    | NM_021209 | NLRC4 | 1.05E-05    | CDS  |
| hsa-miR-4327    | NM_021209 | NLRC4 | 0.001564227 | CDS  |
| hsa-miR-4265    | NM_021209 | NLRC4 | 4.48E-05    | CDS  |
| hsa-miR-4265    | NM_021209 | NLRC4 | 6.75E-07    | CDS  |
| hsa-miR-4265    | NM_021209 | NLRC4 | 0.2724825   | CDS  |
| hsa-miR-4266    | NM_021209 | NLRC4 | 4.74E-06    | CDS  |
| hsa-miR-4262    | NM_021209 | NLRC4 | 6.67E-05    | CDS  |
| hsa-miR-2355-5p | NM_021209 | NLRC4 | 0.001180368 | CDS  |
| hsa-miR-2355-3p | NM_021209 | NLRC4 | 0.01626591  | CDS  |
| hsa-miR-4268    | NM_021209 | NLRC4 | 4.47E-06    | CDS  |
| hsa-miR-4269    | NM_021209 | NLRC4 | 0.002426029 | CDS  |
| hsa-miR-4269    | NM_021209 | NLRC4 | 0.000293001 | CDS  |
| hsa-miR-4269    | NM_021209 | NLRC4 | 1.54E-05    | CDS  |
| hsa-miR-4270    | NM_021209 | NLRC4 | 0.01236446  | 5UTR |
| hsa-miR-4270    | NM_021209 | NLRC4 | 0.004035133 | CDS  |
| hsa-miR-4271    | NM_021209 | NLRC4 | 0.1988711   | CDS  |

|                 |           |       |             |      |
|-----------------|-----------|-------|-------------|------|
| hsa-miR-4273    | NM_021209 | NLRC4 | 0.01102812  | 5UTR |
| hsa-miR-4274    | NM_021209 | NLRC4 | 8.09E-06    | CDS  |
| hsa-miR-4281    | NM_021209 | NLRC4 | 0.000671559 | CDS  |
| hsa-miR-4281    | NM_021209 | NLRC4 | 0.01001738  | CDS  |
| hsa-miR-4277    | NM_021209 | NLRC4 | 0.006363825 | 5UTR |
| hsa-miR-4278    | NM_021209 | NLRC4 | 0.03498518  | CDS  |
| hsa-miR-4280    | NM_021209 | NLRC4 | 0.000150393 | CDS  |
| hsa-miR-4283    | NM_021209 | NLRC4 | 0.000671559 | CDS  |
| hsa-miR-4287    | NM_021209 | NLRC4 | 0.000268253 | CDS  |
| hsa-miR-4287    | NM_021209 | NLRC4 | 0.000106281 | CDS  |
| hsa-miR-4288    | NM_021209 | NLRC4 | 0.007958347 | CDS  |
| hsa-miR-4288    | NM_021209 | NLRC4 | 0.001120008 | CDS  |
| hsa-miR-4292    | NM_021209 | NLRC4 | 7.16E-06    | CDS  |
| hsa-miR-4289    | NM_021209 | NLRC4 | 7.01E-06    | CDS  |
| hsa-miR-4289    | NM_021209 | NLRC4 | 0.001204086 | CDS  |
| hsa-miR-4291    | NM_021209 | NLRC4 | 0.00175646  | CDS  |
| hsa-miR-4291    | NM_021209 | NLRC4 | 1.19E-05    | CDS  |
| hsa-miR-4330    | NM_021209 | NLRC4 | 0.002444199 | CDS  |
| hsa-miR-500b-5p | NM_021209 | NLRC4 | 0.009867866 | CDS  |
| hsa-miR-500b-3p | NM_021209 | NLRC4 | 0.000201083 | CDS  |
| hsa-miR-500b-3p | NM_021209 | NLRC4 | 4.19E-05    | CDS  |
| hsa-miR-4328    | NM_021209 | NLRC4 | 0.0002172   | CDS  |
| hsa-miR-3605-3p | NM_021209 | NLRC4 | 0.000612062 | CDS  |
| hsa-miR-3612    | NM_021209 | NLRC4 | 4.35E-05    | CDS  |
| hsa-miR-3612    | NM_021209 | NLRC4 | 6.66E-06    | CDS  |
| hsa-miR-3613-5p | NM_021209 | NLRC4 | 0.06825774  | 5UTR |
| hsa-miR-3614-5p | NM_021209 | NLRC4 | 0.006567177 | CDS  |
| hsa-miR-3614-3p | NM_021209 | NLRC4 | 0.00015002  | CDS  |
| hsa-miR-3615    | NM_021209 | NLRC4 | 0.000583201 | CDS  |
| hsa-miR-3615    | NM_021209 | NLRC4 | 7.91E-05    | CDS  |
| hsa-miR-3615    | NM_021209 | NLRC4 | 6.75E-07    | CDS  |
| hsa-miR-3616-5p | NM_021209 | NLRC4 | 0.01648264  | CDS  |
| hsa-miR-3616-3p | NM_021209 | NLRC4 | 0.000326334 | CDS  |
| hsa-miR-3616-3p | NM_021209 | NLRC4 | 0.000384216 | CDS  |
| hsa-miR-3619-5p | NM_021209 | NLRC4 | 0.003455527 | CDS  |
| hsa-miR-3619-5p | NM_021209 | NLRC4 | 1.19E-05    | CDS  |
| hsa-miR-3619-3p | NM_021209 | NLRC4 | 0.008415762 | CDS  |
| hsa-miR-3619-3p | NM_021209 | NLRC4 | 0.00303577  | CDS  |
| hsa-miR-3620-5p | NM_021209 | NLRC4 | 0.000133333 | CDS  |
| hsa-miR-3620-5p | NM_021209 | NLRC4 | 0.002220645 | 5UTR |
| hsa-miR-3620-5p | NM_021209 | NLRC4 | 0.005514936 | CDS  |
| hsa-miR-3620-3p | NM_021209 | NLRC4 | 4.84E-07    | CDS  |
| hsa-miR-3621    | NM_021209 | NLRC4 | 1.85E-05    | CDS  |
| hsa-miR-3621    | NM_021209 | NLRC4 | 1.39E-05    | CDS  |

|                  |           |       |             |      |
|------------------|-----------|-------|-------------|------|
| hsa-miR-3621     | NM_021209 | NLRC4 | 0.005727952 | 5UTR |
| hsa-miR-3622a-5p | NM_021209 | NLRC4 | 0.00091255  | CDS  |
| hsa-miR-3622b-5p | NM_021209 | NLRC4 | 0.003824517 | CDS  |
| hsa-miR-3622b-5p | NM_021209 | NLRC4 | 0.01218382  | CDS  |
| hsa-miR-3622b-5p | NM_021209 | NLRC4 | 0.001202517 | 5UTR |
| hsa-miR-3648     | NM_021209 | NLRC4 | 7.36E-05    | 5UTR |
| hsa-miR-3648     | NM_021209 | NLRC4 | 1.05E-05    | CDS  |
| hsa-miR-3648     | NM_021209 | NLRC4 | 0.001037091 | CDS  |
| hsa-miR-3649     | NM_021209 | NLRC4 | 0.05611306  | CDS  |
| hsa-miR-3650     | NM_021209 | NLRC4 | 3.82E-05    | CDS  |
| hsa-miR-3650     | NM_021209 | NLRC4 | 0.01182994  | CDS  |
| hsa-miR-3651     | NM_021209 | NLRC4 | 4.24E-05    | CDS  |
| hsa-miR-3651     | NM_021209 | NLRC4 | 0.000170659 | CDS  |
| hsa-miR-3652     | NM_021209 | NLRC4 | 0.001567866 | CDS  |
| hsa-miR-3652     | NM_021209 | NLRC4 | 4.41E-05    | CDS  |
| hsa-miR-3654     | NM_021209 | NLRC4 | 0.000897224 | CDS  |
| hsa-miR-3654     | NM_021209 | NLRC4 | 0.004462303 | CDS  |
| hsa-miR-3655     | NM_021209 | NLRC4 | 4.97E-05    | CDS  |
| hsa-miR-3659     | NM_021209 | NLRC4 | 0.008288481 | CDS  |
| hsa-miR-3663-5p  | NM_021209 | NLRC4 | 0.000999579 | CDS  |
| hsa-miR-3663-3p  | NM_021209 | NLRC4 | 0.000331211 | CDS  |
| hsa-miR-3664-3p  | NM_021209 | NLRC4 | 0.000290042 | 5UTR |
| hsa-miR-3664-3p  | NM_021209 | NLRC4 | 0.01479238  | CDS  |
| hsa-miR-3665     | NM_021209 | NLRC4 | 1.14E-07    | CDS  |
| hsa-miR-3665     | NM_021209 | NLRC4 | 9.79E-05    | CDS  |
| hsa-miR-3665     | NM_021209 | NLRC4 | 0.00107409  | CDS  |
| hsa-miR-3667-3p  | NM_021209 | NLRC4 | 0.000120074 | CDS  |
| hsa-miR-3670     | NM_021209 | NLRC4 | 3.68E-05    | CDS  |
| hsa-miR-3675-5p  | NM_021209 | NLRC4 | 5.49E-05    | CDS  |
| hsa-miR-3675-5p  | NM_021209 | NLRC4 | 3.17E-07    | CDS  |
| hsa-miR-3675-5p  | NM_021209 | NLRC4 | 0.003560324 | CDS  |
| hsa-miR-3675-5p  | NM_021209 | NLRC4 | 4.66E-05    | CDS  |
| hsa-miR-3677-5p  | NM_021209 | NLRC4 | 2.65E-05    | CDS  |
| hsa-miR-3677-5p  | NM_021209 | NLRC4 | 0.000153631 | CDS  |
| hsa-miR-3677-5p  | NM_021209 | NLRC4 | 9.25E-07    | CDS  |
| hsa-miR-3677-3p  | NM_021209 | NLRC4 | 7.16E-06    | CDS  |
| hsa-miR-3677-3p  | NM_021209 | NLRC4 | 5.85E-06    | CDS  |
| hsa-miR-3678-3p  | NM_021209 | NLRC4 | 4.41E-05    | CDS  |
| hsa-miR-3679-5p  | NM_021209 | NLRC4 | 0.001275108 | CDS  |
| hsa-miR-3679-5p  | NM_021209 | NLRC4 | 0.000235798 | CDS  |
| hsa-miR-3680-5p  | NM_021209 | NLRC4 | 0.000286363 | CDS  |
| hsa-miR-3680-5p  | NM_021209 | NLRC4 | 0.000159806 | CDS  |
| hsa-miR-3680-3p  | NM_021209 | NLRC4 | 4.78E-05    | CDS  |
| hsa-miR-3680-3p  | NM_021209 | NLRC4 | 4.54E-05    | CDS  |

|                  |           |       |             |      |
|------------------|-----------|-------|-------------|------|
| hsa-miR-3680-3p  | NM_021209 | NLRC4 | 5.03E-05    | 5UTR |
| hsa-miR-3681-5p  | NM_021209 | NLRC4 | 0.000620765 | CDS  |
| hsa-miR-3681-5p  | NM_021209 | NLRC4 | 0.001561663 | CDS  |
| hsa-miR-3681-5p  | NM_021209 | NLRC4 | 0.01718499  | CDS  |
| hsa-miR-3681-3p  | NM_021209 | NLRC4 | 1.60E-07    | CDS  |
| hsa-miR-3682-5p  | NM_021209 | NLRC4 | 0.0037024   | CDS  |
| hsa-miR-3682-3p  | NM_021209 | NLRC4 | 0.000988815 | CDS  |
| hsa-miR-3682-3p  | NM_021209 | NLRC4 | 0.000331211 | CDS  |
| hsa-miR-3688-3p  | NM_021209 | NLRC4 | 0.001999086 | CDS  |
| hsa-miR-3689a-5p | NM_021209 | NLRC4 | 0.000169476 | CDS  |
| hsa-miR-3689a-5p | NM_021209 | NLRC4 | 0.000123515 | CDS  |
| hsa-miR-3689a-3p | NM_021209 | NLRC4 | 4.48E-05    | CDS  |
| hsa-miR-3691-5p  | NM_021209 | NLRC4 | 0.01189954  | CDS  |
| hsa-miR-3691-5p  | NM_021209 | NLRC4 | 0.04158218  | CDS  |
| hsa-miR-3692-5p  | NM_021209 | NLRC4 | 0.01149959  | CDS  |
| hsa-miR-3692-5p  | NM_021209 | NLRC4 | 0.001445108 | CDS  |
| hsa-miR-3692-5p  | NM_021209 | NLRC4 | 0.000649339 | CDS  |
| hsa-miR-3692-3p  | NM_021209 | NLRC4 | 4.78E-05    | CDS  |
| hsa-miR-3692-3p  | NM_021209 | NLRC4 | 0.001965083 | CDS  |
| hsa-miR-3713     | NM_021209 | NLRC4 | 0.000216501 | CDS  |
| hsa-miR-3714     | NM_021209 | NLRC4 | 7.45E-06    | CDS  |
| hsa-miR-3714     | NM_021209 | NLRC4 | 1.86E-05    | CDS  |
| hsa-miR-3180     | NM_021209 | NLRC4 | 4.95E-07    | CDS  |
| hsa-miR-3907     | NM_021209 | NLRC4 | 0.000294775 | CDS  |
| hsa-miR-3689b-5p | NM_021209 | NLRC4 | 0.000169476 | CDS  |
| hsa-miR-3689b-5p | NM_021209 | NLRC4 | 0.000123515 | CDS  |
| hsa-miR-3908     | NM_021209 | NLRC4 | 0.006459822 | CDS  |
| hsa-miR-3909     | NM_021209 | NLRC4 | 0.006055493 | CDS  |
| hsa-miR-3909     | NM_021209 | NLRC4 | 9.61E-05    | CDS  |
| hsa-miR-3911     | NM_021209 | NLRC4 | 6.19E-05    | CDS  |
| hsa-miR-3911     | NM_021209 | NLRC4 | 0.007781444 | 5UTR |
| hsa-miR-3913-5p  | NM_021209 | NLRC4 | 0.000592353 | CDS  |
| hsa-miR-3917     | NM_021209 | NLRC4 | 0.001031207 | CDS  |
| hsa-miR-3917     | NM_021209 | NLRC4 | 0.01083776  | 5UTR |
| hsa-miR-3918     | NM_021209 | NLRC4 | 0.002435779 | CDS  |
| hsa-miR-3918     | NM_021209 | NLRC4 | 0.000671559 | CDS  |
| hsa-miR-3150b-5p | NM_021209 | NLRC4 | 6.18E-05    | CDS  |
| hsa-miR-3150b-5p | NM_021209 | NLRC4 | 6.23E-05    | 5UTR |
| hsa-miR-3150b-3p | NM_021209 | NLRC4 | 0.04142576  | CDS  |
| hsa-miR-3150b-3p | NM_021209 | NLRC4 | 0.005581299 | CDS  |
| hsa-miR-3922-3p  | NM_021209 | NLRC4 | 8.80E-06    | CDS  |
| hsa-miR-3922-3p  | NM_021209 | NLRC4 | 0.002648495 | CDS  |
| hsa-miR-3923     | NM_021209 | NLRC4 | 0.000498853 | CDS  |
| hsa-miR-3925-5p  | NM_021209 | NLRC4 | 0.004592381 | CDS  |

|                   |           |       |             |      |
|-------------------|-----------|-------|-------------|------|
| hsa-miR-3925-3p   | NM_021209 | NLRC4 | 3.98E-05    | CDS  |
| hsa-miR-3927-5p   | NM_021209 | NLRC4 | 2.83E-05    | CDS  |
| hsa-miR-3928-5p   | NM_021209 | NLRC4 | 5.34E-05    | CDS  |
| hsa-miR-3928-5p   | NM_021209 | NLRC4 | 2.13E-05    | CDS  |
| hsa-miR-3928-3p   | NM_021209 | NLRC4 | 8.82E-05    | CDS  |
| hsa-miR-3928-3p   | NM_021209 | NLRC4 | 0.05553747  | CDS  |
| hsa-miR-3929      | NM_021209 | NLRC4 | 1.44E-05    | CDS  |
| hsa-miR-3929      | NM_021209 | NLRC4 | 0.000598122 | CDS  |
| hsa-miR-3929      | NM_021209 | NLRC4 | 0.005514936 | CDS  |
| hsa-miR-3934-5p   | NM_021209 | NLRC4 | 0.001023348 | CDS  |
| hsa-miR-3934-3p   | NM_021209 | NLRC4 | 1.68E-06    | CDS  |
| hsa-miR-3935      | NM_021209 | NLRC4 | 0.01247752  | CDS  |
| hsa-miR-3936      | NM_021209 | NLRC4 | 0.000598122 | CDS  |
| hsa-miR-3936      | NM_021209 | NLRC4 | 9.79E-05    | CDS  |
| hsa-miR-3936      | NM_021209 | NLRC4 | 0.001026694 | 5UTR |
| hsa-miR-3936      | NM_021209 | NLRC4 | 4.35E-05    | CDS  |
| hsa-miR-3937      | NM_021209 | NLRC4 | 4.56E-05    | CDS  |
| hsa-miR-3937      | NM_021209 | NLRC4 | 0.000441636 | CDS  |
| hsa-miR-3940-5p   | NM_021209 | NLRC4 | 0.000799382 | CDS  |
| hsa-miR-3940-5p   | NM_021209 | NLRC4 | 0.000281957 | CDS  |
| hsa-miR-3940-5p   | NM_021209 | NLRC4 | 0.01403961  | CDS  |
| hsa-miR-3943      | NM_021209 | NLRC4 | 3.03E-05    | CDS  |
| hsa-miR-3944-5p   | NM_021209 | NLRC4 | 2.50E-05    | CDS  |
| hsa-miR-3944-5p   | NM_021209 | NLRC4 | 9.02E-06    | CDS  |
| hsa-miR-3944-5p   | NM_021209 | NLRC4 | 1.36E-05    | CDS  |
| hsa-miR-3944-3p   | NM_021209 | NLRC4 | 3.41E-07    | CDS  |
| hsa-miR-3944-3p   | NM_021209 | NLRC4 | 4.59E-06    | CDS  |
| hsa-miR-3945      | NM_021209 | NLRC4 | 0.005727952 | 5UTR |
| hsa-miR-3945      | NM_021209 | NLRC4 | 0.003190413 | CDS  |
| hsa-miR-374c-3p   | NM_021209 | NLRC4 | 0.00216149  | CDS  |
| hsa-miR-374c-3p   | NM_021209 | NLRC4 | 0.003455527 | CDS  |
| hsa-miR-642b-5p   | NM_021209 | NLRC4 | 0.00011505  | CDS  |
| hsa-miR-642b-5p   | NM_021209 | NLRC4 | 0.00303577  | CDS  |
| hsa-miR-642b-3p   | NM_021209 | NLRC4 | 0.003190413 | CDS  |
| hsa-miR-550b-2-5p | NM_021209 | NLRC4 | 4.91E-06    | CDS  |
| hsa-miR-550b-2-5p | NM_021209 | NLRC4 | 0.000297589 | CDS  |
| hsa-miR-550b-3p   | NM_021209 | NLRC4 | 1.12E-05    | CDS  |
| hsa-miR-550b-3p   | NM_021209 | NLRC4 | 0.01016125  | CDS  |
| hsa-miR-1268b     | NM_021209 | NLRC4 | 0.001170791 | CDS  |
| hsa-miR-1268b     | NM_021209 | NLRC4 | 0.001897022 | CDS  |
| hsa-miR-548ab     | NM_021209 | NLRC4 | 0.000337384 | CDS  |
| hsa-miR-4418      | NM_021209 | NLRC4 | 1.12E-06    | CDS  |
| hsa-miR-378f      | NM_021209 | NLRC4 | 0.003596187 | CDS  |
| hsa-miR-378f      | NM_021209 | NLRC4 | 6.47E-06    | CDS  |

|                  |           |       |             |      |
|------------------|-----------|-------|-------------|------|
| hsa-miR-378f     | NM_021209 | NLRC4 | 0.01048706  | CDS  |
| hsa-miR-4420     | NM_021209 | NLRC4 | 0.000552817 | CDS  |
| hsa-miR-4420     | NM_021209 | NLRC4 | 0.0172206   | CDS  |
| hsa-miR-4421     | NM_021209 | NLRC4 | 0.000381964 | CDS  |
| hsa-miR-4421     | NM_021209 | NLRC4 | 8.35E-05    | CDS  |
| hsa-miR-4422     | NM_021209 | NLRC4 | 6.12E-08    | CDS  |
| hsa-miR-4422     | NM_021209 | NLRC4 | 0.000137416 | CDS  |
| hsa-miR-4423-5p  | NM_021209 | NLRC4 | 0.009935842 | CDS  |
| hsa-miR-4423-3p  | NM_021209 | NLRC4 | 6.98E-06    | CDS  |
| hsa-miR-378g     | NM_021209 | NLRC4 | 1.46E-05    | CDS  |
| hsa-miR-378g     | NM_021209 | NLRC4 | 7.71E-05    | CDS  |
| hsa-miR-4425     | NM_021209 | NLRC4 | 4.03E-05    | CDS  |
| hsa-miR-4428     | NM_021209 | NLRC4 | 0.07187657  | CDS  |
| hsa-miR-4428     | NM_021209 | NLRC4 | 0.000163267 | CDS  |
| hsa-miR-4429     | NM_021209 | NLRC4 | 0.00107409  | CDS  |
| hsa-miR-4430     | NM_021209 | NLRC4 | 0.001025993 | CDS  |
| hsa-miR-4431     | NM_021209 | NLRC4 | 2.15E-05    | CDS  |
| hsa-miR-4433a-5p | NM_021209 | NLRC4 | 0.008579731 | CDS  |
| hsa-miR-4433a-3p | NM_021209 | NLRC4 | 0.001170791 | CDS  |
| hsa-miR-4433a-3p | NM_021209 | NLRC4 | 0.000519233 | CDS  |
| hsa-miR-4433a-3p | NM_021209 | NLRC4 | 0.01473863  | CDS  |
| hsa-miR-4435     | NM_021209 | NLRC4 | 0.003650386 | CDS  |
| hsa-miR-4435     | NM_021209 | NLRC4 | 0.008691157 | 5UTR |
| hsa-miR-4436a    | NM_021209 | NLRC4 | 0.000605168 | CDS  |
| hsa-miR-4436a    | NM_021209 | NLRC4 | 3.16E-06    | CDS  |
| hsa-miR-4436a    | NM_021209 | NLRC4 | 0.00216149  | CDS  |
| hsa-miR-4436a    | NM_021209 | NLRC4 | 3.15E-05    | CDS  |
| hsa-miR-4437     | NM_021209 | NLRC4 | 0.0645003   | CDS  |
| hsa-miR-4437     | NM_021209 | NLRC4 | 1.04E-07    | CDS  |
| hsa-miR-4439     | NM_021209 | NLRC4 | 0.01718499  | CDS  |
| hsa-miR-4440     | NM_021209 | NLRC4 | 0.000121469 | CDS  |
| hsa-miR-4440     | NM_021209 | NLRC4 | 0.000235484 | CDS  |
| hsa-miR-4440     | NM_021209 | NLRC4 | 7.16E-06    | CDS  |
| hsa-miR-4441     | NM_021209 | NLRC4 | 0.07138354  | CDS  |
| hsa-miR-4442     | NM_021209 | NLRC4 | 0.000126244 | CDS  |
| hsa-miR-4442     | NM_021209 | NLRC4 | 0.000605168 | CDS  |
| hsa-miR-4442     | NM_021209 | NLRC4 | 0.01099788  | CDS  |
| hsa-miR-4445-5p  | NM_021209 | NLRC4 | 1.08E-05    | CDS  |
| hsa-miR-4445-5p  | NM_021209 | NLRC4 | 0.000103244 | CDS  |
| hsa-miR-4446-5p  | NM_021209 | NLRC4 | 6.06E-05    | CDS  |
| hsa-miR-4446-5p  | NM_021209 | NLRC4 | 0.001291886 | CDS  |
| hsa-miR-4446-3p  | NM_021209 | NLRC4 | 0.007721901 | CDS  |
| hsa-miR-4447     | NM_021209 | NLRC4 | 0.00237631  | CDS  |
| hsa-miR-4447     | NM_021209 | NLRC4 | 0.009044755 | CDS  |

|                 |           |       |             |      |
|-----------------|-----------|-------|-------------|------|
| hsa-miR-4447    | NM_021209 | NLRC4 | 0.008258314 | CDS  |
| hsa-miR-4447    | NM_021209 | NLRC4 | 0.008037564 | CDS  |
| hsa-miR-4448    | NM_021209 | NLRC4 | 0.000129339 | CDS  |
| hsa-miR-4448    | NM_021209 | NLRC4 | 0.000618871 | CDS  |
| hsa-miR-4449    | NM_021209 | NLRC4 | 1.98E-07    | CDS  |
| hsa-miR-4449    | NM_021209 | NLRC4 | 0.000246572 | CDS  |
| hsa-miR-4450    | NM_021209 | NLRC4 | 0.00177024  | CDS  |
| hsa-miR-4450    | NM_021209 | NLRC4 | 0.2077442   | CDS  |
| hsa-miR-4450    | NM_021209 | NLRC4 | 0.03151826  | CDS  |
| hsa-miR-4451    | NM_021209 | NLRC4 | 0.02421421  | CDS  |
| hsa-miR-4451    | NM_021209 | NLRC4 | 0.000755782 | CDS  |
| hsa-miR-4452    | NM_021209 | NLRC4 | 0.003529999 | CDS  |
| hsa-miR-4454    | NM_021209 | NLRC4 | 0.0264118   | CDS  |
| hsa-miR-4456    | NM_021209 | NLRC4 | 8.53E-06    | CDS  |
| hsa-miR-4458    | NM_021209 | NLRC4 | 0.08871414  | CDS  |
| hsa-miR-378h    | NM_021209 | NLRC4 | 0.003596187 | CDS  |
| hsa-miR-3135b   | NM_021209 | NLRC4 | 0.00216149  | CDS  |
| hsa-miR-4462    | NM_021209 | NLRC4 | 0.02815115  | CDS  |
| hsa-miR-4463    | NM_021209 | NLRC4 | 0.08150963  | CDS  |
| hsa-miR-4463    | NM_021209 | NLRC4 | 2.55E-05    | CDS  |
| hsa-miR-4463    | NM_021209 | NLRC4 | 0.000241027 | CDS  |
| hsa-miR-4463    | NM_021209 | NLRC4 | 0.000427409 | CDS  |
| hsa-miR-4465    | NM_021209 | NLRC4 | 0.001069961 | CDS  |
| hsa-miR-4466    | NM_021209 | NLRC4 | 8.25E-06    | CDS  |
| hsa-miR-4466    | NM_021209 | NLRC4 | 0.000608953 | CDS  |
| hsa-miR-4467    | NM_021209 | NLRC4 | 8.97E-06    | CDS  |
| hsa-miR-4467    | NM_021209 | NLRC4 | 0.000105297 | CDS  |
| hsa-miR-4469    | NM_021209 | NLRC4 | 7.01E-06    | CDS  |
| hsa-miR-4469    | NM_021209 | NLRC4 | 0.000116174 | CDS  |
| hsa-miR-4472    | NM_021209 | NLRC4 | 0.009044755 | CDS  |
| hsa-miR-4472    | NM_021209 | NLRC4 | 0.000933789 | CDS  |
| hsa-miR-4474-5p | NM_021209 | NLRC4 | 0.000265177 | CDS  |
| hsa-miR-4474-3p | NM_021209 | NLRC4 | 0.006712235 | CDS  |
| hsa-miR-4474-3p | NM_021209 | NLRC4 | 9.02E-06    | CDS  |
| hsa-miR-4475    | NM_021209 | NLRC4 | 0.002224226 | CDS  |
| hsa-miR-4475    | NM_021209 | NLRC4 | 5.47E-06    | CDS  |
| hsa-miR-4476    | NM_021209 | NLRC4 | 1.73E-05    | CDS  |
| hsa-miR-4477b   | NM_021209 | NLRC4 | 0.02268423  | CDS  |
| hsa-miR-4478    | NM_021209 | NLRC4 | 0.005514936 | CDS  |
| hsa-miR-4478    | NM_021209 | NLRC4 | 0.000598122 | CDS  |
| hsa-miR-4478    | NM_021209 | NLRC4 | 7.19E-05    | CDS  |
| hsa-miR-3689d   | NM_021209 | NLRC4 | 3.74E-07    | CDS  |
| hsa-miR-3689d   | NM_021209 | NLRC4 | 0.000640331 | 5UTR |
| hsa-miR-3689e   | NM_021209 | NLRC4 | 0.000169476 | CDS  |

|                 |           |       |             |      |
|-----------------|-----------|-------|-------------|------|
| hsa-miR-3689e   | NM_021209 | NLRC4 | 0.000123515 | CDS  |
| hsa-miR-3689f   | NM_021209 | NLRC4 | 0.01801811  | CDS  |
| hsa-miR-3689f   | NM_021209 | NLRC4 | 0.00345569  | CDS  |
| hsa-miR-4479    | NM_021209 | NLRC4 | 0.000120896 | CDS  |
| hsa-miR-4479    | NM_021209 | NLRC4 | 2.59E-05    | CDS  |
| hsa-miR-3155b   | NM_021209 | NLRC4 | 6.15E-05    | CDS  |
| hsa-miR-3155b   | NM_021209 | NLRC4 | 0.001170791 | CDS  |
| hsa-miR-4481    | NM_021209 | NLRC4 | 0.00237631  | CDS  |
| hsa-miR-4482-5p | NM_021209 | NLRC4 | 0.00014298  | CDS  |
| hsa-miR-4482-3p | NM_021209 | NLRC4 | 0.1194994   | CDS  |
| hsa-miR-4482-3p | NM_021209 | NLRC4 | 5.25E-05    | CDS  |
| hsa-miR-4483    | NM_021209 | NLRC4 | 0.00237631  | CDS  |
| hsa-miR-4483    | NM_021209 | NLRC4 | 0.005126806 | CDS  |
| hsa-miR-4483    | NM_021209 | NLRC4 | 0.003719112 | 5UTR |
| hsa-miR-4485-5p | NM_021209 | NLRC4 | 8.27E-06    | CDS  |
| hsa-miR-4485-5p | NM_021209 | NLRC4 | 8.36E-06    | CDS  |
| hsa-miR-4485-3p | NM_021209 | NLRC4 | 0.000262096 | 5UTR |
| hsa-miR-4486    | NM_021209 | NLRC4 | 0.003230363 | 5UTR |
| hsa-miR-4486    | NM_021209 | NLRC4 | 0.000116549 | CDS  |
| hsa-miR-4486    | NM_021209 | NLRC4 | 0.00216149  | CDS  |
| hsa-miR-4488    | NM_021209 | NLRC4 | 0.001661235 | CDS  |
| hsa-miR-4488    | NM_021209 | NLRC4 | 2.97E-05    | 5UTR |
| hsa-miR-4489    | NM_021209 | NLRC4 | 0.01176218  | CDS  |
| hsa-miR-4489    | NM_021209 | NLRC4 | 0.003706663 | CDS  |
| hsa-miR-4491    | NM_021209 | NLRC4 | 7.06E-05    | CDS  |
| hsa-miR-4492    | NM_021209 | NLRC4 | 7.68E-06    | CDS  |
| hsa-miR-4492    | NM_021209 | NLRC4 | 5.97E-06    | CDS  |
| hsa-miR-4493    | NM_021209 | NLRC4 | 5.60E-05    | CDS  |
| hsa-miR-4493    | NM_021209 | NLRC4 | 0.000337248 | 5UTR |
| hsa-miR-4494    | NM_021209 | NLRC4 | 0.000238785 | CDS  |
| hsa-miR-4494    | NM_021209 | NLRC4 | 1.96E-05    | CDS  |
| hsa-miR-4496    | NM_021209 | NLRC4 | 0.00933987  | CDS  |
| hsa-miR-4498    | NM_021209 | NLRC4 | 0.001139799 | CDS  |
| hsa-miR-4498    | NM_021209 | NLRC4 | 0.00016652  | CDS  |
| hsa-miR-4498    | NM_021209 | NLRC4 | 0.001447161 | CDS  |
| hsa-miR-4499    | NM_021209 | NLRC4 | 0.01730902  | CDS  |
| hsa-miR-4501    | NM_021209 | NLRC4 | 0.000123515 | CDS  |
| hsa-miR-4501    | NM_021209 | NLRC4 | 3.16E-05    | CDS  |
| hsa-miR-4502    | NM_021209 | NLRC4 | 0.01388705  | CDS  |
| hsa-miR-4505    | NM_021209 | NLRC4 | 0.001025993 | CDS  |
| hsa-miR-4506    | NM_021209 | NLRC4 | 0.001750774 | CDS  |
| hsa-miR-4506    | NM_021209 | NLRC4 | 0.1222725   | CDS  |
| hsa-miR-2392    | NM_021209 | NLRC4 | 8.25E-06    | CDS  |
| hsa-miR-2392    | NM_021209 | NLRC4 | 0.000353409 | 5UTR |



|                  |           |       |             |      |
|------------------|-----------|-------|-------------|------|
| hsa-miR-2392     | NM_021209 | NLRC4 | 0.01924989  | CDS  |
| hsa-miR-4507     | NM_021209 | NLRC4 | 1.46E-05    | CDS  |
| hsa-miR-4507     | NM_021209 | NLRC4 | 0.01465807  | CDS  |
| hsa-miR-4507     | NM_021209 | NLRC4 | 7.71E-05    | CDS  |
| hsa-miR-4507     | NM_021209 | NLRC4 | 0.01083776  | 5UTR |
| hsa-miR-4508     | NM_021209 | NLRC4 | 0.006363825 | 5UTR |
| hsa-miR-4510     | NM_021209 | NLRC4 | 0.000153868 | CDS  |
| hsa-miR-4510     | NM_021209 | NLRC4 | 0.02741169  | CDS  |
| hsa-miR-4511     | NM_021209 | NLRC4 | 0.003385126 | CDS  |
| hsa-miR-4511     | NM_021209 | NLRC4 | 0.04411314  | CDS  |
| hsa-miR-4512     | NM_021209 | NLRC4 | 0.001727314 | CDS  |
| hsa-miR-4512     | NM_021209 | NLRC4 | 3.69E-06    | CDS  |
| hsa-miR-4512     | NM_021209 | NLRC4 | 1.49E-05    | CDS  |
| hsa-miR-4513     | NM_021209 | NLRC4 | 0.000241027 | CDS  |
| hsa-miR-4513     | NM_021209 | NLRC4 | 4.41E-05    | CDS  |
| hsa-miR-4514     | NM_021209 | NLRC4 | 0.1067239   | CDS  |
| hsa-miR-4514     | NM_021209 | NLRC4 | 0.002677635 | CDS  |
| hsa-miR-4515     | NM_021209 | NLRC4 | 3.58E-06    | CDS  |
| hsa-miR-4516     | NM_021209 | NLRC4 | 0.07702311  | CDS  |
| hsa-miR-4518     | NM_021209 | NLRC4 | 0.07041108  | CDS  |
| hsa-miR-4518     | NM_021209 | NLRC4 | 0.009066731 | CDS  |
| hsa-miR-4519     | NM_021209 | NLRC4 | 0.004002253 | 5UTR |
| hsa-miR-4519     | NM_021209 | NLRC4 | 0.004110503 | CDS  |
| hsa-miR-4519     | NM_021209 | NLRC4 | 1.33E-07    | CDS  |
| hsa-miR-4520-5p  | NM_021209 | NLRC4 | 0.000107277 | CDS  |
| hsa-miR-4520-5p  | NM_021209 | NLRC4 | 0.03271231  | CDS  |
| hsa-miR-4520-5p  | NM_021209 | NLRC4 | 0.006567177 | CDS  |
| hsa-miR-4520-3p  | NM_021209 | NLRC4 | 0.003230363 | 5UTR |
| hsa-miR-4521     | NM_021209 | NLRC4 | 0.002226838 | CDS  |
| hsa-miR-1269b    | NM_021209 | NLRC4 | 0.000238785 | CDS  |
| hsa-miR-4522     | NM_021209 | NLRC4 | 5.78E-07    | CDS  |
| hsa-miR-4522     | NM_021209 | NLRC4 | 5.54E-06    | CDS  |
| hsa-miR-4522     | NM_021209 | NLRC4 | 2.94E-05    | CDS  |
| hsa-miR-4523     | NM_021209 | NLRC4 | 0.004958121 | CDS  |
| hsa-miR-4523     | NM_021209 | NLRC4 | 0.002744589 | CDS  |
| hsa-miR-4524a-5p | NM_021209 | NLRC4 | 0.000217711 | CDS  |
| hsa-miR-4524a-3p | NM_021209 | NLRC4 | 0.001742576 | CDS  |
| hsa-miR-4524a-3p | NM_021209 | NLRC4 | 0.000441636 | CDS  |
| hsa-miR-4525     | NM_021209 | NLRC4 | 6.08E-05    | CDS  |
| hsa-miR-4526     | NM_021209 | NLRC4 | 0.0101559   | CDS  |
| hsa-miR-4527     | NM_021209 | NLRC4 | 0.009486119 | CDS  |
| hsa-miR-4529-5p  | NM_021209 | NLRC4 | 3.58E-06    | CDS  |
| hsa-miR-4529-3p  | NM_021209 | NLRC4 | 0.000104356 | CDS  |
| hsa-miR-4530     | NM_021209 | NLRC4 | 1.52E-06    | CDS  |

|                 |           |       |             |      |
|-----------------|-----------|-------|-------------|------|
| hsa-miR-4531    | NM_021209 | NLRC4 | 0.001640847 | 5UTR |
| hsa-miR-4533    | NM_021209 | NLRC4 | 0.01842555  | CDS  |
| hsa-miR-4533    | NM_021209 | NLRC4 | 0.02468582  | CDS  |
| hsa-miR-4534    | NM_021209 | NLRC4 | 0.01924989  | CDS  |
| hsa-miR-4534    | NM_021209 | NLRC4 | 0.01001738  | CDS  |
| hsa-miR-4535    | NM_021209 | NLRC4 | 0.005514936 | CDS  |
| hsa-miR-4535    | NM_021209 | NLRC4 | 6.20E-05    | CDS  |
| hsa-miR-1587    | NM_021209 | NLRC4 | 1.46E-05    | CDS  |
| hsa-miR-1587    | NM_021209 | NLRC4 | 0.006212097 | 5UTR |
| hsa-miR-1587    | NM_021209 | NLRC4 | 0.0645003   | CDS  |
| hsa-miR-1587    | NM_021209 | NLRC4 | 0.002020599 | CDS  |
| hsa-miR-548an   | NM_021209 | NLRC4 | 0.000859196 | CDS  |
| hsa-miR-4537    | NM_021209 | NLRC4 | 0.01247752  | CDS  |
| hsa-miR-4537    | NM_021209 | NLRC4 | 0.000196593 | CDS  |
| hsa-miR-4537    | NM_021209 | NLRC4 | 0.005109208 | CDS  |
| hsa-miR-4537    | NM_021209 | NLRC4 | 8.56E-06    | CDS  |
| hsa-miR-4538    | NM_021209 | NLRC4 | 0.001031207 | CDS  |
| hsa-miR-4538    | NM_021209 | NLRC4 | 0.01910603  | CDS  |
| hsa-miR-4538    | NM_021209 | NLRC4 | 0.009768947 | CDS  |
| hsa-miR-4539    | NM_021209 | NLRC4 | 0.001027397 | CDS  |
| hsa-miR-4539    | NM_021209 | NLRC4 | 0.02677736  | CDS  |
| hsa-miR-4540    | NM_021209 | NLRC4 | 6.26E-05    | CDS  |
| hsa-miR-3960    | NM_021209 | NLRC4 | 0.001025993 | CDS  |
| hsa-miR-3960    | NM_021209 | NLRC4 | 1.00E-06    | CDS  |
| hsa-miR-3960    | NM_021209 | NLRC4 | 0.000105297 | CDS  |
| hsa-miR-3972    | NM_021209 | NLRC4 | 1.22E-05    | CDS  |
| hsa-miR-3972    | NM_021209 | NLRC4 | 3.81E-05    | CDS  |
| hsa-miR-3972    | NM_021209 | NLRC4 | 0.000495206 | CDS  |
| hsa-miR-3975    | NM_021209 | NLRC4 | 0.02308526  | CDS  |
| hsa-miR-3976    | NM_021209 | NLRC4 | 0.006459822 | CDS  |
| hsa-miR-3977    | NM_021209 | NLRC4 | 0.002346565 | CDS  |
| hsa-miR-3978    | NM_021209 | NLRC4 | 0.000345859 | CDS  |
| hsa-miR-4632-5p | NM_021209 | NLRC4 | 9.02E-05    | CDS  |
| hsa-miR-4632-5p | NM_021209 | NLRC4 | 0.000133333 | CDS  |
| hsa-miR-4632-3p | NM_021209 | NLRC4 | 5.87E-05    | CDS  |
| hsa-miR-4632-3p | NM_021209 | NLRC4 | 0.000126244 | CDS  |
| hsa-miR-4632-3p | NM_021209 | NLRC4 | 0.000487376 | CDS  |
| hsa-miR-4632-3p | NM_021209 | NLRC4 | 6.02E-06    | CDS  |
| hsa-miR-4633-5p | NM_021209 | NLRC4 | 0.01388229  | CDS  |
| hsa-miR-4633-5p | NM_021209 | NLRC4 | 0.004730357 | CDS  |
| hsa-miR-4633-3p | NM_021209 | NLRC4 | 4.59E-05    | CDS  |
| hsa-miR-4633-3p | NM_021209 | NLRC4 | 3.68E-05    | CDS  |
| hsa-miR-4634    | NM_021209 | NLRC4 | 1.39E-05    | CDS  |
| hsa-miR-4634    | NM_021209 | NLRC4 | 2.59E-05    | CDS  |

|                  |           |       |             |      |
|------------------|-----------|-------|-------------|------|
| hsa-miR-4635     | NM_021209 | NLRC4 | 2.96E-05    | CDS  |
| hsa-miR-4638-5p  | NM_021209 | NLRC4 | 0.00011008  | CDS  |
| hsa-miR-4638-5p  | NM_021209 | NLRC4 | 2.51E-05    | CDS  |
| hsa-miR-4638-3p  | NM_021209 | NLRC4 | 0.000388466 | CDS  |
| hsa-miR-4638-3p  | NM_021209 | NLRC4 | 0.01801811  | CDS  |
| hsa-miR-4639-3p  | NM_021209 | NLRC4 | 2.98E-05    | CDS  |
| hsa-miR-4640-5p  | NM_021209 | NLRC4 | 0.001447161 | CDS  |
| hsa-miR-4640-3p  | NM_021209 | NLRC4 | 0.000381964 | CDS  |
| hsa-miR-4641     | NM_021209 | NLRC4 | 0.00014298  | CDS  |
| hsa-miR-4642     | NM_021209 | NLRC4 | 0.003651178 | CDS  |
| hsa-miR-4645-3p  | NM_021209 | NLRC4 | 0.007995041 | CDS  |
| hsa-miR-4646-5p  | NM_021209 | NLRC4 | 0.08241963  | CDS  |
| hsa-miR-4646-3p  | NM_021209 | NLRC4 | 0.000148632 | CDS  |
| hsa-miR-4647     | NM_021209 | NLRC4 | 0.000123213 | CDS  |
| hsa-miR-4647     | NM_021209 | NLRC4 | 0.000297589 | CDS  |
| hsa-miR-4648     | NM_021209 | NLRC4 | 0.001053639 | CDS  |
| hsa-miR-4648     | NM_021209 | NLRC4 | 0.000248928 | CDS  |
| hsa-miR-4648     | NM_021209 | NLRC4 | 0.000189447 | CDS  |
| hsa-miR-4649-5p  | NM_021209 | NLRC4 | 0.003007178 | 5UTR |
| hsa-miR-4649-5p  | NM_021209 | NLRC4 | 0.000427409 | CDS  |
| hsa-miR-4649-3p  | NM_021209 | NLRC4 | 0.007691023 | CDS  |
| hsa-miR-4650-5p  | NM_021209 | NLRC4 | 0.000772438 | CDS  |
| hsa-miR-4650-3p  | NM_021209 | NLRC4 | 0.000608953 | CDS  |
| hsa-miR-4651     | NM_021209 | NLRC4 | 0.005846554 | 5UTR |
| hsa-miR-4652-5p  | NM_021209 | NLRC4 | 0.001661235 | CDS  |
| hsa-miR-4652-3p  | NM_021209 | NLRC4 | 0.00033047  | CDS  |
| hsa-miR-4652-3p  | NM_021209 | NLRC4 | 0.01971301  | CDS  |
| hsa-miR-4653-3p  | NM_021209 | NLRC4 | 0.002206803 | CDS  |
| hsa-miR-4653-3p  | NM_021209 | NLRC4 | 0.000478711 | CDS  |
| hsa-miR-4654     | NM_021209 | NLRC4 | 0.000743386 | CDS  |
| hsa-miR-4654     | NM_021209 | NLRC4 | 0.01545477  | CDS  |
| hsa-miR-4655-5p  | NM_021209 | NLRC4 | 0.01479238  | CDS  |
| hsa-miR-4655-3p  | NM_021209 | NLRC4 | 4.54E-05    | CDS  |
| hsa-miR-4655-3p  | NM_021209 | NLRC4 | 7.95E-06    | CDS  |
| hsa-miR-4655-3p  | NM_021209 | NLRC4 | 0.000251763 | CDS  |
| hsa-miR-4655-3p  | NM_021209 | NLRC4 | 7.76E-05    | CDS  |
| hsa-miR-4656     | NM_021209 | NLRC4 | 3.41E-07    | CDS  |
| hsa-miR-4656     | NM_021209 | NLRC4 | 0.000755782 | CDS  |
| hsa-miR-4657     | NM_021209 | NLRC4 | 0.02308038  | CDS  |
| hsa-miR-4658     | NM_021209 | NLRC4 | 0.004089574 | 5UTR |
| hsa-miR-4658     | NM_021209 | NLRC4 | 3.74E-07    | CDS  |
| hsa-miR-4659a-3p | NM_021209 | NLRC4 | 4.27E-05    | CDS  |
| hsa-miR-4660     | NM_021209 | NLRC4 | 1.43E-05    | CDS  |
| hsa-miR-4661-3p  | NM_021209 | NLRC4 | 7.01E-06    | CDS  |

|                  |           |       |             |      |
|------------------|-----------|-------|-------------|------|
| hsa-miR-4662a-5p | NM_021209 | NLRC4 | 0.000993094 | CDS  |
| hsa-miR-4662a-5p | NM_021209 | NLRC4 | 0.02013325  | 5UTR |
| hsa-miR-4663     | NM_021209 | NLRC4 | 2.13E-05    | CDS  |
| hsa-miR-4664-5p  | NM_021209 | NLRC4 | 0.000268963 | CDS  |
| hsa-miR-4664-3p  | NM_021209 | NLRC4 | 0.000290042 | 5UTR |
| hsa-miR-4664-3p  | NM_021209 | NLRC4 | 6.44E-07    | CDS  |
| hsa-miR-4665-5p  | NM_021209 | NLRC4 | 2.97E-05    | 5UTR |
| hsa-miR-4665-3p  | NM_021209 | NLRC4 | 0.001031207 | CDS  |
| hsa-miR-4667-5p  | NM_021209 | NLRC4 | 0.04319399  | CDS  |
| hsa-miR-4667-5p  | NM_021209 | NLRC4 | 4.41E-05    | CDS  |
| hsa-miR-4667-3p  | NM_021209 | NLRC4 | 0.0210857   | CDS  |
| hsa-miR-219b-5p  | NM_021209 | NLRC4 | 1.56E-05    | CDS  |
| hsa-miR-219b-3p  | NM_021209 | NLRC4 | 6.94E-05    | CDS  |
| hsa-miR-4669     | NM_021209 | NLRC4 | 7.53E-05    | CDS  |
| hsa-miR-4669     | NM_021209 | NLRC4 | 0.01110275  | CDS  |
| hsa-miR-4669     | NM_021209 | NLRC4 | 0.001372113 | CDS  |
| hsa-miR-4670-5p  | NM_021209 | NLRC4 | 0.000226534 | CDS  |
| hsa-miR-4671-5p  | NM_021209 | NLRC4 | 0.009164864 | CDS  |
| hsa-miR-4672     | NM_021209 | NLRC4 | 0.003203264 | CDS  |
| hsa-miR-4672     | NM_021209 | NLRC4 | 0.000536357 | CDS  |
| hsa-miR-4674     | NM_021209 | NLRC4 | 4.98E-06    | CDS  |
| hsa-miR-4674     | NM_021209 | NLRC4 | 0.003230363 | 5UTR |
| hsa-miR-4674     | NM_021209 | NLRC4 | 1.46E-05    | CDS  |
| hsa-miR-4676-5p  | NM_021209 | NLRC4 | 0.000132382 | CDS  |
| hsa-miR-4676-3p  | NM_021209 | NLRC4 | 3.07E-05    | CDS  |
| hsa-miR-4676-3p  | NM_021209 | NLRC4 | 0.000535268 | CDS  |
| hsa-miR-4677-5p  | NM_021209 | NLRC4 | 0.001083295 | CDS  |
| hsa-miR-4677-5p  | NM_021209 | NLRC4 | 0.01912106  | CDS  |
| hsa-miR-4677-5p  | NM_021209 | NLRC4 | 0.003518183 | CDS  |
| hsa-miR-4677-5p  | NM_021209 | NLRC4 | 0.001965083 | CDS  |
| hsa-miR-4681     | NM_021209 | NLRC4 | 0.00216149  | CDS  |
| hsa-miR-4681     | NM_021209 | NLRC4 | 0.001742576 | CDS  |
| hsa-miR-4682     | NM_021209 | NLRC4 | 5.45E-06    | CDS  |
| hsa-miR-4682     | NM_021209 | NLRC4 | 0.01048706  | CDS  |
| hsa-miR-4683     | NM_021209 | NLRC4 | 0.000749413 | CDS  |
| hsa-miR-4684-5p  | NM_021209 | NLRC4 | 3.07E-05    | CDS  |
| hsa-miR-4684-3p  | NM_021209 | NLRC4 | 0.000502803 | CDS  |
| hsa-miR-4685-5p  | NM_021209 | NLRC4 | 6.23E-05    | 5UTR |
| hsa-miR-4685-5p  | NM_021209 | NLRC4 | 3.70E-07    | CDS  |
| hsa-miR-4685-5p  | NM_021209 | NLRC4 | 3.78E-05    | CDS  |
| hsa-miR-4685-5p  | NM_021209 | NLRC4 | 0.007721901 | CDS  |
| hsa-miR-4685-3p  | NM_021209 | NLRC4 | 0.000583201 | CDS  |
| hsa-miR-4685-3p  | NM_021209 | NLRC4 | 0.000719145 | CDS  |
| hsa-miR-4686     | NM_021209 | NLRC4 | 0.1399983   | CDS  |

|                 |           |       |             |      |
|-----------------|-----------|-------|-------------|------|
| hsa-miR-4686    | NM_021209 | NLRC4 | 0.001120008 | CDS  |
| hsa-miR-4687-5p | NM_021209 | NLRC4 | 0.000170659 | CDS  |
| hsa-miR-4687-3p | NM_021209 | NLRC4 | 2.51E-05    | CDS  |
| hsa-miR-4687-3p | NM_021209 | NLRC4 | 0.01105221  | CDS  |
| hsa-miR-4687-3p | NM_021209 | NLRC4 | 0.00116715  | CDS  |
| hsa-miR-1343-5p | NM_021209 | NLRC4 | 9.24E-06    | CDS  |
| hsa-miR-1343-5p | NM_021209 | NLRC4 | 3.28E-05    | 5UTR |
| hsa-miR-1343-3p | NM_021209 | NLRC4 | 0.000107277 | CDS  |
| hsa-miR-1343-3p | NM_021209 | NLRC4 | 0.000244245 | CDS  |
| hsa-miR-1343-3p | NM_021209 | NLRC4 | 4.98E-06    | CDS  |
| hsa-miR-4688    | NM_021209 | NLRC4 | 0.000166471 | 5UTR |
| hsa-miR-4688    | NM_021209 | NLRC4 | 0.01473863  | CDS  |
| hsa-miR-4689    | NM_021209 | NLRC4 | 4.41E-05    | CDS  |
| hsa-miR-4689    | NM_021209 | NLRC4 | 0.0696302   | CDS  |
| hsa-miR-4690-5p | NM_021209 | NLRC4 | 0.000133333 | CDS  |
| hsa-miR-4690-5p | NM_021209 | NLRC4 | 0.001742576 | CDS  |
| hsa-miR-4690-3p | NM_021209 | NLRC4 | 6.39E-05    | CDS  |
| hsa-miR-4690-3p | NM_021209 | NLRC4 | 0.000217711 | CDS  |
| hsa-miR-4691-5p | NM_021209 | NLRC4 | 0.000239915 | CDS  |
| hsa-miR-4691-5p | NM_021209 | NLRC4 | 0.000125663 | CDS  |
| hsa-miR-4691-5p | NM_021209 | NLRC4 | 0.001383748 | CDS  |
| hsa-miR-4691-3p | NM_021209 | NLRC4 | 1.83E-05    | CDS  |
| hsa-miR-4691-3p | NM_021209 | NLRC4 | 0.008073378 | CDS  |
| hsa-miR-4692    | NM_021209 | NLRC4 | 2.75E-07    | CDS  |
| hsa-miR-4692    | NM_021209 | NLRC4 | 0.01420162  | CDS  |
| hsa-miR-4693-3p | NM_021209 | NLRC4 | 0.000205155 | CDS  |
| hsa-miR-4695-5p | NM_021209 | NLRC4 | 0.001404358 | 5UTR |
| hsa-miR-4695-5p | NM_021209 | NLRC4 | 1.73E-05    | CDS  |
| hsa-miR-4695-3p | NM_021209 | NLRC4 | 0.002434622 | CDS  |
| hsa-miR-4697-5p | NM_021209 | NLRC4 | 0.000142999 | CDS  |
| hsa-miR-4697-3p | NM_021209 | NLRC4 | 2.08E-05    | CDS  |
| hsa-miR-4700-5p | NM_021209 | NLRC4 | 8.82E-05    | CDS  |
| hsa-miR-4700-3p | NM_021209 | NLRC4 | 0.001033441 | CDS  |
| hsa-miR-4701-3p | NM_021209 | NLRC4 | 0.006212097 | 5UTR |
| hsa-miR-4704-3p | NM_021209 | NLRC4 | 1.83E-05    | CDS  |
| hsa-miR-4705    | NM_021209 | NLRC4 | 6.65E-06    | CDS  |
| hsa-miR-4706    | NM_021209 | NLRC4 | 0.000855203 | CDS  |
| hsa-miR-4706    | NM_021209 | NLRC4 | 0.004509441 | CDS  |
| hsa-miR-4707-5p | NM_021209 | NLRC4 | 1.98E-07    | CDS  |
| hsa-miR-4707-5p | NM_021209 | NLRC4 | 0.001499137 | CDS  |
| hsa-miR-4707-5p | NM_021209 | NLRC4 | 6.57E-06    | CDS  |
| hsa-miR-4707-3p | NM_021209 | NLRC4 | 3.58E-06    | CDS  |
| hsa-miR-4708-5p | NM_021209 | NLRC4 | 0.000123213 | CDS  |
| hsa-miR-4708-5p | NM_021209 | NLRC4 | 0.000749413 | CDS  |

|                 |           |       |             |      |
|-----------------|-----------|-------|-------------|------|
| hsa-miR-4708-3p | NM_021209 | NLRC4 | 6.71E-05    | 5UTR |
| hsa-miR-4709-5p | NM_021209 | NLRC4 | 0.002114959 | CDS  |
| hsa-miR-4709-3p | NM_021209 | NLRC4 | 0.004849261 | CDS  |
| hsa-miR-4709-3p | NM_021209 | NLRC4 | 0.01220348  | CDS  |
| hsa-miR-203b-5p | NM_021209 | NLRC4 | 2.65E-05    | CDS  |
| hsa-miR-4710    | NM_021209 | NLRC4 | 8.25E-06    | CDS  |
| hsa-miR-4710    | NM_021209 | NLRC4 | 9.29E-05    | CDS  |
| hsa-miR-4710    | NM_021209 | NLRC4 | 0.009044755 | CDS  |
| hsa-miR-4710    | NM_021209 | NLRC4 | 0.005727952 | 5UTR |
| hsa-miR-4711-3p | NM_021209 | NLRC4 | 0.000802077 | CDS  |
| hsa-miR-4711-3p | NM_021209 | NLRC4 | 0.01050676  | CDS  |
| hsa-miR-4711-3p | NM_021209 | NLRC4 | 0.04836105  | CDS  |
| hsa-miR-4712-5p | NM_021209 | NLRC4 | 1.92E-05    | CDS  |
| hsa-miR-4712-5p | NM_021209 | NLRC4 | 5.71E-06    | CDS  |
| hsa-miR-4713-5p | NM_021209 | NLRC4 | 0.001035763 | CDS  |
| hsa-miR-4713-5p | NM_021209 | NLRC4 | 0.000106281 | CDS  |
| hsa-miR-4713-5p | NM_021209 | NLRC4 | 0.000245493 | CDS  |
| hsa-miR-4713-3p | NM_021209 | NLRC4 | 0.01708205  | CDS  |
| hsa-miR-4713-3p | NM_021209 | NLRC4 | 0.001633284 | CDS  |
| hsa-miR-4714-5p | NM_021209 | NLRC4 | 3.09E-05    | CDS  |
| hsa-miR-4714-3p | NM_021209 | NLRC4 | 6.18E-05    | CDS  |
| hsa-miR-4715-5p | NM_021209 | NLRC4 | 0.000215072 | CDS  |
| hsa-miR-4715-3p | NM_021209 | NLRC4 | 0.000368725 | CDS  |
| hsa-miR-4715-3p | NM_021209 | NLRC4 | 7.82E-05    | CDS  |
| hsa-miR-4715-3p | NM_021209 | NLRC4 | 0.000196593 | CDS  |
| hsa-miR-4715-3p | NM_021209 | NLRC4 | 8.36E-06    | CDS  |
| hsa-miR-4716-5p | NM_021209 | NLRC4 | 0.01199923  | CDS  |
| hsa-miR-4716-3p | NM_021209 | NLRC4 | 0.005727952 | 5UTR |
| hsa-miR-4716-3p | NM_021209 | NLRC4 | 0.03964555  | CDS  |
| hsa-miR-4717-5p | NM_021209 | NLRC4 | 5.85E-06    | CDS  |
| hsa-miR-4717-5p | NM_021209 | NLRC4 | 0.001447161 | CDS  |
| hsa-miR-4717-3p | NM_021209 | NLRC4 | 0.000109153 | CDS  |
| hsa-miR-4717-3p | NM_021209 | NLRC4 | 0.02888349  | CDS  |
| hsa-miR-4718    | NM_021209 | NLRC4 | 0.008942302 | 5UTR |
| hsa-miR-4720-5p | NM_021209 | NLRC4 | 0.0011826   | CDS  |
| hsa-miR-4722-5p | NM_021209 | NLRC4 | 1.85E-05    | CDS  |
| hsa-miR-4722-3p | NM_021209 | NLRC4 | 7.91E-05    | CDS  |
| hsa-miR-4722-3p | NM_021209 | NLRC4 | 2.27E-05    | CDS  |
| hsa-miR-4723-5p | NM_021209 | NLRC4 | 0.000135949 | CDS  |
| hsa-miR-4723-5p | NM_021209 | NLRC4 | 4.66E-05    | CDS  |
| hsa-miR-4723-5p | NM_021209 | NLRC4 | 0.001661235 | CDS  |
| hsa-miR-4723-3p | NM_021209 | NLRC4 | 0.000225565 | CDS  |
| hsa-miR-4723-3p | NM_021209 | NLRC4 | 0.001383748 | CDS  |
| hsa-miR-4723-3p | NM_021209 | NLRC4 | 0.00014298  | CDS  |

|                 |           |       |             |      |
|-----------------|-----------|-------|-------------|------|
| hsa-miR-451b    | NM_021209 | NLRC4 | 9.54E-06    | CDS  |
| hsa-miR-4724-5p | NM_021209 | NLRC4 | 0.01048706  | CDS  |
| hsa-miR-4724-5p | NM_021209 | NLRC4 | 0.001372911 | CDS  |
| hsa-miR-4724-3p | NM_021209 | NLRC4 | 8.56E-06    | CDS  |
| hsa-miR-4724-3p | NM_021209 | NLRC4 | 1.88E-05    | CDS  |
| hsa-miR-4725-5p | NM_021209 | NLRC4 | 0.00372152  | CDS  |
| hsa-miR-4726-5p | NM_021209 | NLRC4 | 3.41E-07    | CDS  |
| hsa-miR-4726-5p | NM_021209 | NLRC4 | 0.02447189  | CDS  |
| hsa-miR-4726-3p | NM_021209 | NLRC4 | 7.76E-05    | CDS  |
| hsa-miR-4726-3p | NM_021209 | NLRC4 | 1.04E-05    | CDS  |
| hsa-miR-4726-3p | NM_021209 | NLRC4 | 0.000166253 | CDS  |
| hsa-miR-4726-3p | NM_021209 | NLRC4 | 6.15E-05    | CDS  |
| hsa-miR-4727-5p | NM_021209 | NLRC4 | 7.95E-06    | CDS  |
| hsa-miR-4727-5p | NM_021209 | NLRC4 | 6.54E-06    | CDS  |
| hsa-miR-4728-5p | NM_021209 | NLRC4 | 9.13E-05    | CDS  |
| hsa-miR-4728-5p | NM_021209 | NLRC4 | 0.009056833 | CDS  |
| hsa-miR-4728-5p | NM_021209 | NLRC4 | 0.02468582  | CDS  |
| hsa-miR-4728-3p | NM_021209 | NLRC4 | 0.01363586  | CDS  |
| hsa-miR-4729    | NM_021209 | NLRC4 | 0.000649339 | CDS  |
| hsa-miR-4730    | NM_021209 | NLRC4 | 0.002648495 | CDS  |
| hsa-miR-4731-5p | NM_021209 | NLRC4 | 0.001014772 | CDS  |
| hsa-miR-4731-3p | NM_021209 | NLRC4 | 0.04467349  | CDS  |
| hsa-miR-4731-3p | NM_021209 | NLRC4 | 2.79E-05    | CDS  |
| hsa-miR-4732-3p | NM_021209 | NLRC4 | 0.001218159 | CDS  |
| hsa-miR-4732-3p | NM_021209 | NLRC4 | 0.000166253 | CDS  |
| hsa-miR-4732-3p | NM_021209 | NLRC4 | 1.82E-06    | CDS  |
| hsa-miR-4733-3p | NM_021209 | NLRC4 | 0.000137166 | CDS  |
| hsa-miR-4733-3p | NM_021209 | NLRC4 | 2.23E-07    | CDS  |
| hsa-miR-4734    | NM_021209 | NLRC4 | 2.92E-05    | CDS  |
| hsa-miR-4734    | NM_021209 | NLRC4 | 2.27E-06    | CDS  |
| hsa-miR-4736    | NM_021209 | NLRC4 | 0.008691157 | 5UTR |
| hsa-miR-4736    | NM_021209 | NLRC4 | 4.05E-05    | CDS  |
| hsa-miR-4736    | NM_021209 | NLRC4 | 0.000110757 | CDS  |
| hsa-miR-4737    | NM_021209 | NLRC4 | 9.35E-05    | CDS  |
| hsa-miR-3064-5p | NM_021209 | NLRC4 | 1.70E-05    | CDS  |
| hsa-miR-3064-5p | NM_021209 | NLRC4 | 2.90E-06    | CDS  |
| hsa-miR-3064-3p | NM_021209 | NLRC4 | 2.83E-05    | CDS  |
| hsa-miR-4738-5p | NM_021209 | NLRC4 | 0.001466882 | CDS  |
| hsa-miR-4738-3p | NM_021209 | NLRC4 | 4.41E-05    | CDS  |
| hsa-miR-4738-3p | NM_021209 | NLRC4 | 0.01195042  | CDS  |
| hsa-miR-4738-3p | NM_021209 | NLRC4 | 4.98E-06    | CDS  |
| hsa-miR-4740-5p | NM_021209 | NLRC4 | 1.01E-05    | CDS  |
| hsa-miR-4740-3p | NM_021209 | NLRC4 | 0.00013388  | CDS  |
| hsa-miR-4741    | NM_021209 | NLRC4 | 3.41E-07    | CDS  |

|                 |           |       |             |      |
|-----------------|-----------|-------|-------------|------|
| hsa-miR-4741    | NM_021209 | NLRC4 | 0.000115293 | CDS  |
| hsa-miR-4741    | NM_021209 | NLRC4 | 3.28E-05    | 5UTR |
| hsa-miR-4743-5p | NM_021209 | NLRC4 | 0.002365478 | CDS  |
| hsa-miR-4743-5p | NM_021209 | NLRC4 | 0.001025993 | CDS  |
| hsa-miR-4743-5p | NM_021209 | NLRC4 | 0.00043678  | CDS  |
| hsa-miR-4743-3p | NM_021209 | NLRC4 | 0.000455398 | CDS  |
| hsa-miR-122b-3p | NM_021209 | NLRC4 | 0.000280807 | 5UTR |
| hsa-miR-4745-5p | NM_021209 | NLRC4 | 1.12E-05    | CDS  |
| hsa-miR-4745-5p | NM_021209 | NLRC4 | 0.000112833 | CDS  |
| hsa-miR-4745-5p | NM_021209 | NLRC4 | 0.000171267 | CDS  |
| hsa-miR-4746-5p | NM_021209 | NLRC4 | 0.000423087 | CDS  |
| hsa-miR-4746-5p | NM_021209 | NLRC4 | 0.006122178 | CDS  |
| hsa-miR-4746-5p | NM_021209 | NLRC4 | 9.79E-05    | 5UTR |
| hsa-miR-4746-3p | NM_021209 | NLRC4 | 7.45E-06    | CDS  |
| hsa-miR-4746-3p | NM_021209 | NLRC4 | 0.000233688 | CDS  |
| hsa-miR-4746-3p | NM_021209 | NLRC4 | 0.000216501 | CDS  |
| hsa-miR-4747-5p | NM_021209 | NLRC4 | 0.07138354  | CDS  |
| hsa-miR-4747-5p | NM_021209 | NLRC4 | 0.000654256 | CDS  |
| hsa-miR-4747-3p | NM_021209 | NLRC4 | 0.001447161 | CDS  |
| hsa-miR-4747-3p | NM_021209 | NLRC4 | 0.00037471  | CDS  |
| hsa-miR-4747-3p | NM_021209 | NLRC4 | 3.70E-05    | CDS  |
| hsa-miR-4748    | NM_021209 | NLRC4 | 0.1613492   | CDS  |
| hsa-miR-4748    | NM_021209 | NLRC4 | 0.0645003   | CDS  |
| hsa-miR-4748    | NM_021209 | NLRC4 | 0.000334534 | CDS  |
| hsa-miR-4748    | NM_021209 | NLRC4 | 0.000598122 | CDS  |
| hsa-miR-4748    | NM_021209 | NLRC4 | 0.002871608 | CDS  |
| hsa-miR-4749-5p | NM_021209 | NLRC4 | 5.44E-05    | 5UTR |
| hsa-miR-4749-5p | NM_021209 | NLRC4 | 8.91E-06    | CDS  |
| hsa-miR-4749-3p | NM_021209 | NLRC4 | 7.69E-06    | CDS  |
| hsa-miR-4750-5p | NM_021209 | NLRC4 | 0.000211789 | CDS  |
| hsa-miR-4750-5p | NM_021209 | NLRC4 | 0.02675239  | CDS  |
| hsa-miR-4750-3p | NM_021209 | NLRC4 | 7.91E-05    | CDS  |
| hsa-miR-4751    | NM_021209 | NLRC4 | 4.90E-05    | CDS  |
| hsa-miR-4751    | NM_021209 | NLRC4 | 0.000521544 | CDS  |
| hsa-miR-4751    | NM_021209 | NLRC4 | 0.000122342 | CDS  |
| hsa-miR-4751    | NM_021209 | NLRC4 | 0.005514936 | CDS  |
| hsa-miR-4753-5p | NM_021209 | NLRC4 | 0.000137416 | CDS  |
| hsa-miR-4754    | NM_021209 | NLRC4 | 0.000150393 | CDS  |
| hsa-miR-4754    | NM_021209 | NLRC4 | 0.03273842  | CDS  |
| hsa-miR-4754    | NM_021209 | NLRC4 | 5.45E-06    | CDS  |
| hsa-miR-4755-5p | NM_021209 | NLRC4 | 2.02E-05    | CDS  |
| hsa-miR-4755-5p | NM_021209 | NLRC4 | 4.27E-05    | CDS  |
| hsa-miR-4755-5p | NM_021209 | NLRC4 | 0.008762609 | CDS  |
| hsa-miR-4755-3p | NM_021209 | NLRC4 | 0.00043678  | CDS  |



|                  |           |       |             |      |
|------------------|-----------|-------|-------------|------|
| hsa-miR-4755-3p  | NM_021209 | NLRC4 | 4.03E-05    | CDS  |
| hsa-miR-4755-3p  | NM_021209 | NLRC4 | 6.15E-05    | CDS  |
| hsa-miR-499b-3p  | NM_021209 | NLRC4 | 0.006950725 | CDS  |
| hsa-miR-4756-5p  | NM_021209 | NLRC4 | 0.002757107 | CDS  |
| hsa-miR-4756-5p  | NM_021209 | NLRC4 | 6.44E-05    | CDS  |
| hsa-miR-4757-5p  | NM_021209 | NLRC4 | 0.002426029 | CDS  |
| hsa-miR-4757-5p  | NM_021209 | NLRC4 | 0.000740642 | CDS  |
| hsa-miR-4757-5p  | NM_021209 | NLRC4 | 7.09E-05    | 5UTR |
| hsa-miR-4757-3p  | NM_021209 | NLRC4 | 0.05756387  | CDS  |
| hsa-miR-4758-5p  | NM_021209 | NLRC4 | 0.000855203 | CDS  |
| hsa-miR-4758-5p  | NM_021209 | NLRC4 | 0.000570492 | CDS  |
| hsa-miR-4758-5p  | NM_021209 | NLRC4 | 0.03129093  | CDS  |
| hsa-miR-4758-5p  | NM_021209 | NLRC4 | 0.002744245 | 5UTR |
| hsa-miR-4758-3p  | NM_021209 | NLRC4 | 6.41E-06    | CDS  |
| hsa-miR-4761-3p  | NM_021209 | NLRC4 | 0.002744589 | CDS  |
| hsa-miR-4761-3p  | NM_021209 | NLRC4 | 2.69E-06    | CDS  |
| hsa-miR-4761-3p  | NM_021209 | NLRC4 | 0.000207579 | CDS  |
| hsa-miR-4763-5p  | NM_021209 | NLRC4 | 0.000167343 | CDS  |
| hsa-miR-4763-5p  | NM_021209 | NLRC4 | 2.98E-05    | CDS  |
| hsa-miR-4763-3p  | NM_021209 | NLRC4 | 1.00E-06    | CDS  |
| hsa-miR-4763-3p  | NM_021209 | NLRC4 | 0.00092503  | CDS  |
| hsa-miR-4766-5p  | NM_021209 | NLRC4 | 0.006869599 | CDS  |
| hsa-miR-4767     | NM_021209 | NLRC4 | 0.001033441 | CDS  |
| hsa-miR-4767     | NM_021209 | NLRC4 | 7.08E-06    | CDS  |
| hsa-miR-4768-5p  | NM_021209 | NLRC4 | 0.03262098  | 5UTR |
| hsa-miR-4768-3p  | NM_021209 | NLRC4 | 0.01479238  | CDS  |
| hsa-miR-4769-5p  | NM_021209 | NLRC4 | 0.01730902  | CDS  |
| hsa-miR-4769-5p  | NM_021209 | NLRC4 | 2.51E-05    | CDS  |
| hsa-miR-4769-3p  | NM_021209 | NLRC4 | 0.007691023 | CDS  |
| hsa-miR-4771     | NM_021209 | NLRC4 | 2.01E-05    | CDS  |
| hsa-miR-4776-5p  | NM_021209 | NLRC4 | 0.003450568 | CDS  |
| hsa-miR-4776-3p  | NM_021209 | NLRC4 | 4.84E-07    | CDS  |
| hsa-miR-4776-3p  | NM_021209 | NLRC4 | 1.35E-05    | CDS  |
| hsa-miR-4776-3p  | NM_021209 | NLRC4 | 0.000285506 | 5UTR |
| hsa-miR-4777-3p  | NM_021209 | NLRC4 | 7.01E-06    | CDS  |
| hsa-miR-4778-3p  | NM_021209 | NLRC4 | 6.20E-07    | CDS  |
| hsa-miR-4780     | NM_021209 | NLRC4 | 0.02225154  | 5UTR |
| hsa-miR-4436b-5p | NM_021209 | NLRC4 | 8.86E-07    | CDS  |
| hsa-miR-4436b-5p | NM_021209 | NLRC4 | 1.05E-05    | 5UTR |
| hsa-miR-4436b-3p | NM_021209 | NLRC4 | 0.000100105 | CDS  |
| hsa-miR-4436b-3p | NM_021209 | NLRC4 | 6.00E-06    | CDS  |
| hsa-miR-4436b-3p | NM_021209 | NLRC4 | 0.000671559 | CDS  |
| hsa-miR-4781-5p  | NM_021209 | NLRC4 | 0.003719112 | 5UTR |
| hsa-miR-4781-5p  | NM_021209 | NLRC4 | 5.44E-05    | 5UTR |

|                  |           |       |             |     |
|------------------|-----------|-------|-------------|-----|
| hsa-miR-4781-3p  | NM_021209 | NLRC4 | 0.01363586  | CDS |
| hsa-miR-4781-3p  | NM_021209 | NLRC4 | 0.000406814 | CDS |
| hsa-miR-4783-5p  | NM_021209 | NLRC4 | 1.39E-05    | CDS |
| hsa-miR-4783-3p  | NM_021209 | NLRC4 | 1.12E-05    | CDS |
| hsa-miR-4784     | NM_021209 | NLRC4 | 0.00085614  | CDS |
| hsa-miR-4784     | NM_021209 | NLRC4 | 0.007362526 | CDS |
| hsa-miR-4785     | NM_021209 | NLRC4 | 3.99E-05    | CDS |
| hsa-miR-1245b-5p | NM_021209 | NLRC4 | 0.004854961 | CDS |
| hsa-miR-1245b-3p | NM_021209 | NLRC4 | 2.47E-05    | CDS |
| hsa-miR-2467-5p  | NM_021209 | NLRC4 | 6.17E-06    | CDS |
| hsa-miR-2467-3p  | NM_021209 | NLRC4 | 1.00E-06    | CDS |
| hsa-miR-2467-3p  | NM_021209 | NLRC4 | 0.000217711 | CDS |
| hsa-miR-4786-5p  | NM_021209 | NLRC4 | 0.01000834  | CDS |
| hsa-miR-4786-5p  | NM_021209 | NLRC4 | 0.000271137 | CDS |
| hsa-miR-4786-3p  | NM_021209 | NLRC4 | 5.34E-05    | CDS |
| hsa-miR-4787-5p  | NM_021209 | NLRC4 | 1.77E-06    | CDS |
| hsa-miR-4787-5p  | NM_021209 | NLRC4 | 0.00091255  | CDS |
| hsa-miR-4787-3p  | NM_021209 | NLRC4 | 1.28E-06    | CDS |
| hsa-miR-4787-3p  | NM_021209 | NLRC4 | 0.000167343 | CDS |
| hsa-miR-4788     | NM_021209 | NLRC4 | 0.000952318 | CDS |
| hsa-miR-4788     | NM_021209 | NLRC4 | 0.003190413 | CDS |
| hsa-miR-4789-3p  | NM_021209 | NLRC4 | 0.000109153 | CDS |
| hsa-miR-4793-5p  | NM_021209 | NLRC4 | 3.57E-05    | CDS |
| hsa-miR-4793-5p  | NM_021209 | NLRC4 | 6.20E-07    | CDS |
| hsa-miR-4793-3p  | NM_021209 | NLRC4 | 0.005380517 | CDS |
| hsa-miR-4793-3p  | NM_021209 | NLRC4 | 7.69E-05    | CDS |
| hsa-miR-4796-3p  | NM_021209 | NLRC4 | 0.02398038  | CDS |
| hsa-miR-4799-5p  | NM_021209 | NLRC4 | 9.02E-06    | CDS |
| hsa-miR-4799-3p  | NM_021209 | NLRC4 | 0.000169986 | CDS |
| hsa-miR-4799-3p  | NM_021209 | NLRC4 | 2.13E-05    | CDS |
| hsa-miR-4800-5p  | NM_021209 | NLRC4 | 0.000153631 | CDS |
| hsa-miR-4800-5p  | NM_021209 | NLRC4 | 0.02308038  | CDS |
| hsa-miR-4800-3p  | NM_021209 | NLRC4 | 0.002274012 | CDS |
| hsa-miR-4802-5p  | NM_021209 | NLRC4 | 5.97E-06    | CDS |
| hsa-miR-4802-5p  | NM_021209 | NLRC4 | 9.56E-06    | CDS |
| hsa-miR-4999-5p  | NM_021209 | NLRC4 | 6.94E-05    | CDS |
| hsa-miR-5000-3p  | NM_021209 | NLRC4 | 0.01519719  | CDS |
| hsa-miR-5000-3p  | NM_021209 | NLRC4 | 2.73E-06    | CDS |
| hsa-miR-5001-5p  | NM_021209 | NLRC4 | 0.000608953 | CDS |
| hsa-miR-5001-5p  | NM_021209 | NLRC4 | 0.00151455  | CDS |
| hsa-miR-5001-5p  | NM_021209 | NLRC4 | 9.02E-05    | CDS |
| hsa-miR-5001-5p  | NM_021209 | NLRC4 | 0.000135859 | CDS |
| hsa-miR-5001-3p  | NM_021209 | NLRC4 | 0.06177347  | CDS |
| hsa-miR-5002-5p  | NM_021209 | NLRC4 | 2.73E-06    | CDS |

|                 |           |       |             |      |
|-----------------|-----------|-------|-------------|------|
| hsa-miR-5002-5p | NM_021209 | NLRC4 | 0.01201202  | CDS  |
| hsa-miR-5002-5p | NM_021209 | NLRC4 | 0.005266164 | CDS  |
| hsa-miR-5002-5p | NM_021209 | NLRC4 | 0.1304055   | CDS  |
| hsa-miR-5003-3p | NM_021209 | NLRC4 | 0.004422789 | CDS  |
| hsa-miR-5004-5p | NM_021209 | NLRC4 | 0.0195374   | 5UTR |
| hsa-miR-5004-5p | NM_021209 | NLRC4 | 0.000478711 | CDS  |
| hsa-miR-5004-3p | NM_021209 | NLRC4 | 0.000158814 | CDS  |
| hsa-miR-5006-5p | NM_021209 | NLRC4 | 2.23E-07    | CDS  |
| hsa-miR-5006-5p | NM_021209 | NLRC4 | 0.002472386 | CDS  |
| hsa-miR-5006-3p | NM_021209 | NLRC4 | 0.000719145 | CDS  |
| hsa-miR-5006-3p | NM_021209 | NLRC4 | 0.000143515 | CDS  |
| hsa-miR-5008-5p | NM_021209 | NLRC4 | 7.01E-06    | CDS  |
| hsa-miR-5008-5p | NM_021209 | NLRC4 | 7.19E-05    | CDS  |
| hsa-miR-5008-3p | NM_021209 | NLRC4 | 0.000381964 | CDS  |
| hsa-miR-5008-3p | NM_021209 | NLRC4 | 0.01135416  | 5UTR |
| hsa-miR-5009-5p | NM_021209 | NLRC4 | 0.003596187 | CDS  |
| hsa-miR-5009-5p | NM_021209 | NLRC4 | 0.1011718   | CDS  |
| hsa-miR-5010-5p | NM_021209 | NLRC4 | 0.000598122 | CDS  |
| hsa-miR-5010-3p | NM_021209 | NLRC4 | 0.00033047  | CDS  |
| hsa-miR-5010-3p | NM_021209 | NLRC4 | 0.01672155  | CDS  |
| hsa-miR-5047    | NM_021209 | NLRC4 | 1.12E-06    | CDS  |
| hsa-miR-5047    | NM_021209 | NLRC4 | 0.000170577 | CDS  |
| hsa-miR-5047    | NM_021209 | NLRC4 | 0.002488019 | CDS  |
| hsa-miR-5087    | NM_021209 | NLRC4 | 5.85E-06    | CDS  |
| hsa-miR-5087    | NM_021209 | NLRC4 | 0.001750774 | CDS  |
| hsa-miR-5088-5p | NM_021209 | NLRC4 | 0.0645003   | CDS  |
| hsa-miR-5088-5p | NM_021209 | NLRC4 | 0.000671559 | CDS  |
| hsa-miR-5088-3p | NM_021209 | NLRC4 | 6.44E-07    | CDS  |
| hsa-miR-5088-3p | NM_021209 | NLRC4 | 0.02341705  | CDS  |
| hsa-miR-5089-5p | NM_021209 | NLRC4 | 0.01718499  | CDS  |
| hsa-miR-5089-5p | NM_021209 | NLRC4 | 0.000743386 | CDS  |
| hsa-miR-5089-3p | NM_021209 | NLRC4 | 0.05235348  | 5UTR |
| hsa-miR-5090    | NM_021209 | NLRC4 | 1.92E-06    | CDS  |
| hsa-miR-5090    | NM_021209 | NLRC4 | 0.00210636  | CDS  |
| hsa-miR-5090    | NM_021209 | NLRC4 | 4.98E-06    | CDS  |
| hsa-miR-5091    | NM_021209 | NLRC4 | 0.002114959 | CDS  |
| hsa-miR-5091    | NM_021209 | NLRC4 | 0.000161338 | CDS  |
| hsa-miR-5092    | NM_021209 | NLRC4 | 0.000140506 | CDS  |
| hsa-miR-5093    | NM_021209 | NLRC4 | 0.000113783 | CDS  |
| hsa-miR-5187-5p | NM_021209 | NLRC4 | 0.01330528  | CDS  |
| hsa-miR-5187-5p | NM_021209 | NLRC4 | 0.03602765  | CDS  |
| hsa-miR-5187-5p | NM_021209 | NLRC4 | 0.00086116  | CDS  |
| hsa-miR-5188    | NM_021209 | NLRC4 | 0.000226722 | CDS  |
| hsa-miR-5188    | NM_021209 | NLRC4 | 0.001937031 | CDS  |

|                  |           |       |             |      |
|------------------|-----------|-------|-------------|------|
| hsa-miR-5189-5p  | NM_021209 | NLRC4 | 0.004956985 | 5UTR |
| hsa-miR-5189-5p  | NM_021209 | NLRC4 | 8.80E-06    | CDS  |
| hsa-miR-5190     | NM_021209 | NLRC4 | 3.50E-05    | CDS  |
| hsa-miR-5190     | NM_021209 | NLRC4 | 6.67E-05    | CDS  |
| hsa-miR-5191     | NM_021209 | NLRC4 | 0.000642323 | CDS  |
| hsa-miR-5192     | NM_021209 | NLRC4 | 0.001815418 | CDS  |
| hsa-miR-5192     | NM_021209 | NLRC4 | 6.14E-05    | CDS  |
| hsa-miR-5193     | NM_021209 | NLRC4 | 0.000244245 | CDS  |
| hsa-miR-5193     | NM_021209 | NLRC4 | 0.000106281 | CDS  |
| hsa-miR-5193     | NM_021209 | NLRC4 | 0.02225154  | 5UTR |
| hsa-miR-5194     | NM_021209 | NLRC4 | 3.48E-05    | CDS  |
| hsa-miR-5194     | NM_021209 | NLRC4 | 2.28E-05    | CDS  |
| hsa-miR-5195-3p  | NM_021209 | NLRC4 | 0.000423087 | CDS  |
| hsa-miR-5195-3p  | NM_021209 | NLRC4 | 0.000469993 | CDS  |
| hsa-miR-5196-5p  | NM_021209 | NLRC4 | 0.07138354  | CDS  |
| hsa-miR-5196-5p  | NM_021209 | NLRC4 | 0.009044755 | CDS  |
| hsa-miR-4524b-3p | NM_021209 | NLRC4 | 0.001742576 | CDS  |
| hsa-miR-5571-5p  | NM_021209 | NLRC4 | 0.000447908 | CDS  |
| hsa-miR-5571-3p  | NM_021209 | NLRC4 | 0.000535268 | CDS  |
| hsa-miR-5571-3p  | NM_021209 | NLRC4 | 5.23E-05    | CDS  |
| hsa-miR-5571-3p  | NM_021209 | NLRC4 | 0.000245493 | CDS  |
| hsa-miR-5571-3p  | NM_021209 | NLRC4 | 0.007684299 | CDS  |
| hsa-miR-5100     | NM_021209 | NLRC4 | 0.000604901 | 5UTR |
| hsa-miR-5100     | NM_021209 | NLRC4 | 6.65E-06    | CDS  |
| hsa-miR-5100     | NM_021209 | NLRC4 | 0.007176909 | 5UTR |
| hsa-miR-5572     | NM_021209 | NLRC4 | 1.28E-06    | CDS  |
| hsa-miR-548as-5p | NM_021209 | NLRC4 | 0.0527194   | CDS  |
| hsa-miR-664b-5p  | NM_021209 | NLRC4 | 0.0645003   | CDS  |
| hsa-miR-664b-5p  | NM_021209 | NLRC4 | 0.006459822 | CDS  |
| hsa-miR-664b-5p  | NM_021209 | NLRC4 | 0.003007178 | 5UTR |
| hsa-miR-664b-5p  | NM_021209 | NLRC4 | 0.005609759 | CDS  |
| hsa-miR-664b-3p  | NM_021209 | NLRC4 | 0.001002627 | CDS  |
| hsa-miR-5580-5p  | NM_021209 | NLRC4 | 0.01623033  | CDS  |
| hsa-miR-5580-3p  | NM_021209 | NLRC4 | 0.000161927 | CDS  |
| hsa-miR-5581-5p  | NM_021209 | NLRC4 | 7.95E-06    | CDS  |
| hsa-miR-5581-3p  | NM_021209 | NLRC4 | 0.000245493 | CDS  |
| hsa-miR-5584-5p  | NM_021209 | NLRC4 | 0.008674456 | 5UTR |
| hsa-miR-5584-3p  | NM_021209 | NLRC4 | 0.008149687 | CDS  |
| hsa-miR-5584-3p  | NM_021209 | NLRC4 | 0.000255514 | CDS  |
| hsa-miR-5586-3p  | NM_021209 | NLRC4 | 9.68E-05    | CDS  |
| hsa-miR-5587-5p  | NM_021209 | NLRC4 | 0.001064408 | CDS  |
| hsa-miR-5587-3p  | NM_021209 | NLRC4 | 1.98E-07    | CDS  |
| hsa-miR-548au-3p | NM_021209 | NLRC4 | 0.001495227 | CDS  |
| hsa-miR-548au-3p | NM_021209 | NLRC4 | 7.72E-06    | CDS  |

|                  |           |       |             |      |
|------------------|-----------|-------|-------------|------|
| hsa-miR-548au-3p | NM_021209 | NLRC4 | 1.51E-05    | CDS  |
| hsa-miR-1295b-5p | NM_021209 | NLRC4 | 0.00329055  | CDS  |
| hsa-miR-1295b-5p | NM_021209 | NLRC4 | 0.001389353 | CDS  |
| hsa-miR-1295b-3p | NM_021209 | NLRC4 | 0.001742576 | CDS  |
| hsa-miR-1295b-3p | NM_021209 | NLRC4 | 0.01837384  | CDS  |
| hsa-miR-5588-5p  | NM_021209 | NLRC4 | 0.00085614  | CDS  |
| hsa-miR-5588-5p  | NM_021209 | NLRC4 | 8.77E-05    | CDS  |
| hsa-miR-5588-5p  | NM_021209 | NLRC4 | 0.003092163 | CDS  |
| hsa-miR-5589-5p  | NM_021209 | NLRC4 | 2.92E-05    | CDS  |
| hsa-miR-5589-5p  | NM_021209 | NLRC4 | 0.01201202  | CDS  |
| hsa-miR-5589-3p  | NM_021209 | NLRC4 | 0.000196593 | CDS  |
| hsa-miR-5591-5p  | NM_021209 | NLRC4 | 0.00237631  | CDS  |
| hsa-miR-5591-3p  | NM_021209 | NLRC4 | 0.00014298  | CDS  |
| hsa-miR-5591-3p  | NM_021209 | NLRC4 | 0.000108131 | CDS  |
| hsa-miR-5680     | NM_021209 | NLRC4 | 0.000406814 | CDS  |
| hsa-miR-5682     | NM_021209 | NLRC4 | 0.000537979 | CDS  |
| hsa-miR-5682     | NM_021209 | NLRC4 | 0.006362695 | CDS  |
| hsa-miR-5683     | NM_021209 | NLRC4 | 0.05000297  | CDS  |
| hsa-miR-5684     | NM_021209 | NLRC4 | 0.03362553  | CDS  |
| hsa-miR-548ax    | NM_021209 | NLRC4 | 0.005707855 | CDS  |
| hsa-miR-5685     | NM_021209 | NLRC4 | 1.14E-07    | CDS  |
| hsa-miR-5692c    | NM_021209 | NLRC4 | 0.004618597 | 5UTR |
| hsa-miR-5687     | NM_021209 | NLRC4 | 0.01339061  | CDS  |
| hsa-miR-5681b    | NM_021209 | NLRC4 | 0.000238043 | CDS  |
| hsa-miR-5689     | NM_021209 | NLRC4 | 6.37E-06    | CDS  |
| hsa-miR-5689     | NM_021209 | NLRC4 | 0.04304292  | 5UTR |
| hsa-miR-5691     | NM_021209 | NLRC4 | 9.46E-05    | CDS  |
| hsa-miR-5691     | NM_021209 | NLRC4 | 0.00111785  | CDS  |
| hsa-miR-5696     | NM_021209 | NLRC4 | 0.03362553  | CDS  |
| hsa-miR-5698     | NM_021209 | NLRC4 | 0.001014646 | CDS  |
| hsa-miR-5698     | NM_021209 | NLRC4 | 9.02E-05    | CDS  |
| hsa-miR-5699-5p  | NM_021209 | NLRC4 | 0.000196593 | CDS  |
| hsa-miR-5699-3p  | NM_021209 | NLRC4 | 0.000244245 | CDS  |
| hsa-miR-5699-3p  | NM_021209 | NLRC4 | 0.000721914 | CDS  |
| hsa-miR-5699-3p  | NM_021209 | NLRC4 | 0.000542111 | CDS  |
| hsa-miR-5702     | NM_021209 | NLRC4 | 4.83E-05    | CDS  |
| hsa-miR-5703     | NM_021209 | NLRC4 | 0.0264118   | CDS  |
| hsa-miR-5705     | NM_021209 | NLRC4 | 0.02402248  | CDS  |
| hsa-miR-5705     | NM_021209 | NLRC4 | 2.68E-06    | CDS  |
| hsa-miR-5706     | NM_021209 | NLRC4 | 0.000228869 | CDS  |
| hsa-miR-5706     | NM_021209 | NLRC4 | 0.02787945  | CDS  |
| hsa-miR-5739     | NM_021209 | NLRC4 | 0.0361666   | CDS  |
| hsa-miR-5739     | NM_021209 | NLRC4 | 0.000855203 | CDS  |
| hsa-miR-5787     | NM_021209 | NLRC4 | 3.41E-07    | CDS  |

|                 |           |       |             |      |
|-----------------|-----------|-------|-------------|------|
| hsa-miR-5787    | NM_021209 | NLRC4 | 0.000671559 | CDS  |
| hsa-miR-5787    | NM_021209 | NLRC4 | 0.005727952 | 5UTR |
| hsa-miR-1199-5p | NM_021209 | NLRC4 | 4.98E-06    | CDS  |
| hsa-miR-1199-5p | NM_021209 | NLRC4 | 8.56E-06    | CDS  |
| hsa-miR-1199-3p | NM_021209 | NLRC4 | 6.41E-06    | CDS  |
| hsa-miR-1199-3p | NM_021209 | NLRC4 | 0.006223583 | CDS  |
| hsa-miR-6068    | NM_021209 | NLRC4 | 5.25E-05    | CDS  |
| hsa-miR-6068    | NM_021209 | NLRC4 | 0.003518183 | CDS  |
| hsa-miR-6068    | NM_021209 | NLRC4 | 4.74E-06    | CDS  |
| hsa-miR-6069    | NM_021209 | NLRC4 | 3.41E-07    | CDS  |
| hsa-miR-6070    | NM_021209 | NLRC4 | 0.00021044  | 5UTR |
| hsa-miR-6070    | NM_021209 | NLRC4 | 0.005266164 | CDS  |
| hsa-miR-6071    | NM_021209 | NLRC4 | 0.01228754  | CDS  |
| hsa-miR-6071    | NM_021209 | NLRC4 | 2.94E-05    | CDS  |
| hsa-miR-6072    | NM_021209 | NLRC4 | 0.000211512 | CDS  |
| hsa-miR-6074    | NM_021209 | NLRC4 | 1.92E-05    | CDS  |
| hsa-miR-6075    | NM_021209 | NLRC4 | 1.14E-07    | CDS  |
| hsa-miR-6076    | NM_021209 | NLRC4 | 0.002263662 | CDS  |
| hsa-miR-6077    | NM_021209 | NLRC4 | 2.11E-05    | CDS  |
| hsa-miR-6077    | NM_021209 | NLRC4 | 0.003385126 | CDS  |
| hsa-miR-6078    | NM_021209 | NLRC4 | 1.46E-05    | CDS  |
| hsa-miR-6080    | NM_021209 | NLRC4 | 0.003505388 | CDS  |
| hsa-miR-6081    | NM_021209 | NLRC4 | 0.000161338 | CDS  |
| hsa-miR-6083    | NM_021209 | NLRC4 | 0.04526314  | CDS  |
| hsa-miR-6084    | NM_021209 | NLRC4 | 8.36E-06    | CDS  |
| hsa-miR-6084    | NM_021209 | NLRC4 | 1.12E-05    | CDS  |
| hsa-miR-6085    | NM_021209 | NLRC4 | 9.62E-07    | CDS  |
| hsa-miR-6086    | NM_021209 | NLRC4 | 0.08822971  | CDS  |
| hsa-miR-6086    | NM_021209 | NLRC4 | 0.004035133 | CDS  |
| hsa-miR-6088    | NM_021209 | NLRC4 | 0.03183273  | CDS  |
| hsa-miR-6088    | NM_021209 | NLRC4 | 0.001645489 | CDS  |
| hsa-miR-6089    | NM_021209 | NLRC4 | 0.01176218  | CDS  |
| hsa-miR-6090    | NM_021209 | NLRC4 | 0.001239845 | CDS  |
| hsa-miR-6090    | NM_021209 | NLRC4 | 2.97E-05    | 5UTR |
| hsa-miR-6125    | NM_021209 | NLRC4 | 0.08871414  | CDS  |
| hsa-miR-6125    | NM_021209 | NLRC4 | 0.0264118   | CDS  |
| hsa-miR-6126    | NM_021209 | NLRC4 | 5.54E-06    | CDS  |
| hsa-miR-6127    | NM_021209 | NLRC4 | 0.004639071 | CDS  |
| hsa-miR-6127    | NM_021209 | NLRC4 | 0.04749199  | CDS  |
| hsa-miR-378j    | NM_021209 | NLRC4 | 0.00721524  | CDS  |
| hsa-miR-378j    | NM_021209 | NLRC4 | 0.003596187 | CDS  |
| hsa-miR-6129    | NM_021209 | NLRC4 | 2.09E-06    | CDS  |
| hsa-miR-6131    | NM_021209 | NLRC4 | 0.008691157 | 5UTR |
| hsa-miR-6131    | NM_021209 | NLRC4 | 0.04340877  | CDS  |

|                  |           |       |             |      |
|------------------|-----------|-------|-------------|------|
| hsa-miR-6132     | NM_021209 | NLRC4 | 0.00107409  | CDS  |
| hsa-miR-6132     | NM_021209 | NLRC4 | 0.004040886 | 5UTR |
| hsa-miR-6133     | NM_021209 | NLRC4 | 0.0268879   | CDS  |
| hsa-miR-6165     | NM_021209 | NLRC4 | 0.02245598  | CDS  |
| hsa-miR-6499-5p  | NM_021209 | NLRC4 | 4.98E-06    | CDS  |
| hsa-miR-6499-5p  | NM_021209 | NLRC4 | 3.41E-07    | CDS  |
| hsa-miR-6499-3p  | NM_021209 | NLRC4 | 7.45E-06    | CDS  |
| hsa-miR-6499-3p  | NM_021209 | NLRC4 | 0.02507925  | CDS  |
| hsa-miR-6500-5p  | NM_021209 | NLRC4 | 3.68E-05    | CDS  |
| hsa-miR-6500-5p  | NM_021209 | NLRC4 | 0.005855153 | CDS  |
| hsa-miR-6500-3p  | NM_021209 | NLRC4 | 0.000821102 | CDS  |
| hsa-miR-6500-3p  | NM_021209 | NLRC4 | 0.007495679 | CDS  |
| hsa-miR-6501-5p  | NM_021209 | NLRC4 | 2.27E-06    | CDS  |
| hsa-miR-6501-3p  | NM_021209 | NLRC4 | 7.18E-05    | CDS  |
| hsa-miR-6503-5p  | NM_021209 | NLRC4 | 0.002426029 | CDS  |
| hsa-miR-6503-5p  | NM_021209 | NLRC4 | 0.00037471  | CDS  |
| hsa-miR-6503-5p  | NM_021209 | NLRC4 | 0.02651416  | CDS  |
| hsa-miR-6503-3p  | NM_021209 | NLRC4 | 0.01408661  | CDS  |
| hsa-miR-6503-3p  | NM_021209 | NLRC4 | 6.44E-05    | CDS  |
| hsa-miR-6503-3p  | NM_021209 | NLRC4 | 0.000571804 | CDS  |
| hsa-miR-6505-5p  | NM_021209 | NLRC4 | 0.001481713 | CDS  |
| hsa-miR-6505-3p  | NM_021209 | NLRC4 | 0.00085614  | CDS  |
| hsa-miR-6506-5p  | NM_021209 | NLRC4 | 0.000109036 | CDS  |
| hsa-miR-6506-3p  | NM_021209 | NLRC4 | 0.009344737 | CDS  |
| hsa-miR-6507-5p  | NM_021209 | NLRC4 | 0.02185333  | CDS  |
| hsa-miR-6509-5p  | NM_021209 | NLRC4 | 0.005273831 | CDS  |
| hsa-miR-6509-3p  | NM_021209 | NLRC4 | 1.12E-05    | CDS  |
| hsa-miR-6509-3p  | NM_021209 | NLRC4 | 1.34E-05    | 5UTR |
| hsa-miR-6510-5p  | NM_021209 | NLRC4 | 1.00E-06    | CDS  |
| hsa-miR-6510-5p  | NM_021209 | NLRC4 | 0.002263662 | CDS  |
| hsa-miR-6510-3p  | NM_021209 | NLRC4 | 0.00329055  | CDS  |
| hsa-miR-6511a-5p | NM_021209 | NLRC4 | 0.1067239   | CDS  |
| hsa-miR-6511a-5p | NM_021209 | NLRC4 | 0.002224226 | CDS  |
| hsa-miR-6511a-5p | NM_021209 | NLRC4 | 0.004487638 | CDS  |
| hsa-miR-6511a-3p | NM_021209 | NLRC4 | 0.000119651 | CDS  |
| hsa-miR-6512-5p  | NM_021209 | NLRC4 | 0.005857131 | CDS  |
| hsa-miR-6512-3p  | NM_021209 | NLRC4 | 6.26E-05    | CDS  |
| hsa-miR-6513-5p  | NM_021209 | NLRC4 | 0.000592353 | CDS  |
| hsa-miR-6514-5p  | NM_021209 | NLRC4 | 4.95E-07    | CDS  |
| hsa-miR-6514-5p  | NM_021209 | NLRC4 | 0.00034557  | CDS  |
| hsa-miR-6514-3p  | NM_021209 | NLRC4 | 7.91E-05    | CDS  |
| hsa-miR-6515-5p  | NM_021209 | NLRC4 | 0.08288526  | CDS  |
| hsa-miR-6515-5p  | NM_021209 | NLRC4 | 0.05383761  | CDS  |
| hsa-miR-6515-5p  | NM_021209 | NLRC4 | 0.02468582  | CDS  |

|                  |           |       |             |      |
|------------------|-----------|-------|-------------|------|
| hsa-miR-6515-3p  | NM_021209 | NLRC4 | 0.05096433  | 5UTR |
| hsa-miR-6715b-5p | NM_021209 | NLRC4 | 0.001170791 | CDS  |
| hsa-miR-6716-5p  | NM_021209 | NLRC4 | 0.08882998  | CDS  |
| hsa-miR-6716-5p  | NM_021209 | NLRC4 | 0.00086116  | CDS  |
| hsa-miR-6716-3p  | NM_021209 | NLRC4 | 0.000645151 | CDS  |
| hsa-miR-6717-5p  | NM_021209 | NLRC4 | 6.20E-05    | CDS  |
| hsa-miR-6511b-5p | NM_021209 | NLRC4 | 0.1399983   | CDS  |
| hsa-miR-6511b-5p | NM_021209 | NLRC4 | 0.000211789 | CDS  |
| hsa-miR-6511b-5p | NM_021209 | NLRC4 | 7.71E-05    | CDS  |
| hsa-miR-6511b-5p | NM_021209 | NLRC4 | 0.000502803 | CDS  |
| hsa-miR-6718-5p  | NM_021209 | NLRC4 | 2.65E-05    | CDS  |
| hsa-miR-6718-5p  | NM_021209 | NLRC4 | 0.000618    | CDS  |
| hsa-miR-6718-5p  | NM_021209 | NLRC4 | 0.001064408 | CDS  |
| hsa-miR-6720-5p  | NM_021209 | NLRC4 | 1.47E-05    | CDS  |
| hsa-miR-6720-3p  | NM_021209 | NLRC4 | 0.000133333 | CDS  |
| hsa-miR-6720-3p  | NM_021209 | NLRC4 | 2.55E-05    | CDS  |
| hsa-miR-6720-3p  | NM_021209 | NLRC4 | 2.79E-05    | CDS  |
| hsa-miR-6721-5p  | NM_021209 | NLRC4 | 1.12E-05    | CDS  |
| hsa-miR-6721-5p  | NM_021209 | NLRC4 | 0.1222725   | CDS  |
| hsa-miR-6722-3p  | NM_021209 | NLRC4 | 1.19E-06    | CDS  |
| hsa-miR-6724-5p  | NM_021209 | NLRC4 | 1.46E-05    | CDS  |
| hsa-miR-6724-5p  | NM_021209 | NLRC4 | 4.98E-06    | CDS  |
| hsa-miR-892c-5p  | NM_021209 | NLRC4 | 0.1542798   | CDS  |
| hsa-miR-892c-3p  | NM_021209 | NLRC4 | 0.000120074 | CDS  |
| hsa-miR-6726-5p  | NM_021209 | NLRC4 | 3.17E-07    | CDS  |
| hsa-miR-6726-5p  | NM_021209 | NLRC4 | 0.001633284 | CDS  |
| hsa-miR-6726-5p  | NM_021209 | NLRC4 | 1.16E-05    | CDS  |
| hsa-miR-6726-5p  | NM_021209 | NLRC4 | 0.08715581  | CDS  |
| hsa-miR-6726-3p  | NM_021209 | NLRC4 | 4.84E-07    | CDS  |
| hsa-miR-6726-3p  | NM_021209 | NLRC4 | 0.000186    | CDS  |
| hsa-miR-6726-3p  | NM_021209 | NLRC4 | 0.001031207 | CDS  |
| hsa-miR-6726-3p  | NM_021209 | NLRC4 | 0.005620409 | CDS  |
| hsa-miR-6727-5p  | NM_021209 | NLRC4 | 0.00210636  | CDS  |
| hsa-miR-6727-5p  | NM_021209 | NLRC4 | 3.70E-07    | CDS  |
| hsa-miR-6727-5p  | NM_021209 | NLRC4 | 0.007047336 | CDS  |
| hsa-miR-6727-3p  | NM_021209 | NLRC4 | 0.000244245 | CDS  |
| hsa-miR-6727-3p  | NM_021209 | NLRC4 | 0.000535268 | CDS  |
| hsa-miR-6727-3p  | NM_021209 | NLRC4 | 0.001397618 | CDS  |
| hsa-miR-6728-5p  | NM_021209 | NLRC4 | 0.000834806 | CDS  |
| hsa-miR-6728-5p  | NM_021209 | NLRC4 | 0.02675239  | CDS  |
| hsa-miR-6728-3p  | NM_021209 | NLRC4 | 1.82E-05    | CDS  |
| hsa-miR-6728-3p  | NM_021209 | NLRC4 | 7.91E-05    | CDS  |
| hsa-miR-6729-5p  | NM_021209 | NLRC4 | 0.003824517 | CDS  |
| hsa-miR-6729-5p  | NM_021209 | NLRC4 | 0.000755782 | CDS  |



|                 |           |       |             |      |
|-----------------|-----------|-------|-------------|------|
| hsa-miR-6729-5p | NM_021209 | NLRC4 | 0.003007178 | 5UTR |
| hsa-miR-6729-3p | NM_021209 | NLRC4 | 0.000259323 | CDS  |
| hsa-miR-6729-3p | NM_021209 | NLRC4 | 0.008234576 | CDS  |
| hsa-miR-6730-5p | NM_021209 | NLRC4 | 0.000187316 | CDS  |
| hsa-miR-6730-5p | NM_021209 | NLRC4 | 0.001014646 | CDS  |
| hsa-miR-6731-5p | NM_021209 | NLRC4 | 0.01236446  | 5UTR |
| hsa-miR-6731-5p | NM_021209 | NLRC4 | 0.000135949 | CDS  |
| hsa-miR-6731-3p | NM_021209 | NLRC4 | 0.008234576 | CDS  |
| hsa-miR-6732-5p | NM_021209 | NLRC4 | 0.000598122 | CDS  |
| hsa-miR-6732-5p | NM_021209 | NLRC4 | 0.000100105 | CDS  |
| hsa-miR-6732-3p | NM_021209 | NLRC4 | 0.01665946  | 5UTR |
| hsa-miR-6732-3p | NM_021209 | NLRC4 | 0.009187106 | CDS  |
| hsa-miR-6733-3p | NM_021209 | NLRC4 | 0.01519719  | CDS  |
| hsa-miR-6734-5p | NM_021209 | NLRC4 | 0.002665851 | CDS  |
| hsa-miR-6734-3p | NM_021209 | NLRC4 | 0.000259323 | CDS  |
| hsa-miR-6734-3p | NM_021209 | NLRC4 | 0.000212555 | CDS  |
| hsa-miR-6735-5p | NM_021209 | NLRC4 | 0.02185333  | CDS  |
| hsa-miR-6735-5p | NM_021209 | NLRC4 | 0.005727952 | 5UTR |
| hsa-miR-6735-5p | NM_021209 | NLRC4 | 0.000605168 | CDS  |
| hsa-miR-6735-3p | NM_021209 | NLRC4 | 1.46E-05    | CDS  |
| hsa-miR-6735-3p | NM_021209 | NLRC4 | 1.61E-05    | CDS  |
| hsa-miR-6736-5p | NM_021209 | NLRC4 | 0.000855203 | CDS  |
| hsa-miR-6736-5p | NM_021209 | NLRC4 | 2.10E-06    | CDS  |
| hsa-miR-6736-5p | NM_021209 | NLRC4 | 0.003230363 | 5UTR |
| hsa-miR-6736-3p | NM_021209 | NLRC4 | 8.09E-06    | CDS  |
| hsa-miR-6737-5p | NM_021209 | NLRC4 | 0.01246415  | CDS  |
| hsa-miR-6737-5p | NM_021209 | NLRC4 | 0.000384216 | CDS  |
| hsa-miR-6737-5p | NM_021209 | NLRC4 | 0.1011718   | CDS  |
| hsa-miR-6737-3p | NM_021209 | NLRC4 | 0.01223285  | CDS  |
| hsa-miR-6738-5p | NM_021209 | NLRC4 | 9.62E-07    | CDS  |
| hsa-miR-6738-5p | NM_021209 | NLRC4 | 0.002744245 | 5UTR |
| hsa-miR-6738-3p | NM_021209 | NLRC4 | 3.81E-05    | CDS  |
| hsa-miR-6738-3p | NM_021209 | NLRC4 | 0.000215389 | CDS  |
| hsa-miR-6739-3p | NM_021209 | NLRC4 | 3.07E-05    | CDS  |
| hsa-miR-6740-5p | NM_021209 | NLRC4 | 0.01730902  | CDS  |
| hsa-miR-6740-5p | NM_021209 | NLRC4 | 0.000267696 | CDS  |
| hsa-miR-6740-5p | NM_021209 | NLRC4 | 0.000506083 | CDS  |
| hsa-miR-6740-3p | NM_021209 | NLRC4 | 0.1045722   | CDS  |
| hsa-miR-6740-3p | NM_021209 | NLRC4 | 0.0109425   | CDS  |
| hsa-miR-6741-5p | NM_021209 | NLRC4 | 0.000293001 | CDS  |
| hsa-miR-6741-5p | NM_021209 | NLRC4 | 0.04971988  | CDS  |
| hsa-miR-6741-5p | NM_021209 | NLRC4 | 0.00933987  | CDS  |
| hsa-miR-6741-5p | NM_021209 | NLRC4 | 0.02308038  | CDS  |
| hsa-miR-6742-5p | NM_021209 | NLRC4 | 0.06689403  | CDS  |

|                 |           |       |             |      |
|-----------------|-----------|-------|-------------|------|
| hsa-miR-6742-3p | NM_021209 | NLRC4 | 0.000107277 | CDS  |
| hsa-miR-6742-3p | NM_021209 | NLRC4 | 0.001218159 | CDS  |
| hsa-miR-6742-3p | NM_021209 | NLRC4 | 0.000652497 | CDS  |
| hsa-miR-6743-5p | NM_021209 | NLRC4 | 9.62E-07    | CDS  |
| hsa-miR-6743-5p | NM_021209 | NLRC4 | 0.000379735 | CDS  |
| hsa-miR-6743-5p | NM_021209 | NLRC4 | 0.005727952 | 5UTR |
| hsa-miR-6743-3p | NM_021209 | NLRC4 | 0.06192316  | 5UTR |
| hsa-miR-6744-3p | NM_021209 | NLRC4 | 0.001269939 | CDS  |
| hsa-miR-6744-3p | NM_021209 | NLRC4 | 0.001262872 | CDS  |
| hsa-miR-6744-3p | NM_021209 | NLRC4 | 0.000125663 | CDS  |
| hsa-miR-6745    | NM_021209 | NLRC4 | 0.008326793 | CDS  |
| hsa-miR-6746-5p | NM_021209 | NLRC4 | 4.74E-06    | CDS  |
| hsa-miR-6746-5p | NM_021209 | NLRC4 | 0.01479238  | CDS  |
| hsa-miR-6746-5p | NM_021209 | NLRC4 | 0.02837663  | CDS  |
| hsa-miR-6746-3p | NM_021209 | NLRC4 | 1.88E-05    | CDS  |
| hsa-miR-6746-3p | NM_021209 | NLRC4 | 7.45E-06    | CDS  |
| hsa-miR-6747-5p | NM_021209 | NLRC4 | 0.03151826  | CDS  |
| hsa-miR-6747-5p | NM_021209 | NLRC4 | 0.003824517 | CDS  |
| hsa-miR-6747-3p | NM_021209 | NLRC4 | 5.56E-06    | CDS  |
| hsa-miR-6748-5p | NM_021209 | NLRC4 | 0.009044755 | CDS  |
| hsa-miR-6748-5p | NM_021209 | NLRC4 | 0.03296809  | CDS  |
| hsa-miR-6748-5p | NM_021209 | NLRC4 | 0.000608953 | CDS  |
| hsa-miR-6748-3p | NM_021209 | NLRC4 | 0.009187106 | CDS  |
| hsa-miR-6749-5p | NM_021209 | NLRC4 | 0.000113783 | CDS  |
| hsa-miR-6749-5p | NM_021209 | NLRC4 | 7.68E-06    | CDS  |
| hsa-miR-6749-5p | NM_021209 | NLRC4 | 6.44E-07    | CDS  |
| hsa-miR-6749-3p | NM_021209 | NLRC4 | 0.000106281 | CDS  |
| hsa-miR-6750-5p | NM_021209 | NLRC4 | 6.00E-06    | CDS  |
| hsa-miR-6750-5p | NM_021209 | NLRC4 | 1.73E-05    | CDS  |
| hsa-miR-6750-3p | NM_021209 | NLRC4 | 6.90E-06    | CDS  |
| hsa-miR-6751-5p | NM_021209 | NLRC4 | 0.08241963  | CDS  |
| hsa-miR-6751-5p | NM_021209 | NLRC4 | 0.002208302 | CDS  |
| hsa-miR-6751-3p | NM_021209 | NLRC4 | 0.006712235 | CDS  |
| hsa-miR-6752-5p | NM_021209 | NLRC4 | 0.002744245 | 5UTR |
| hsa-miR-6752-5p | NM_021209 | NLRC4 | 8.25E-06    | CDS  |
| hsa-miR-6752-5p | NM_021209 | NLRC4 | 0.000293001 | CDS  |
| hsa-miR-6752-3p | NM_021209 | NLRC4 | 0.000245493 | CDS  |
| hsa-miR-6752-3p | NM_021209 | NLRC4 | 0.02569602  | 5UTR |
| hsa-miR-6753-5p | NM_021209 | NLRC4 | 7.18E-05    | CDS  |
| hsa-miR-6753-3p | NM_021209 | NLRC4 | 1.40E-05    | 5UTR |
| hsa-miR-6753-3p | NM_021209 | NLRC4 | 0.000381964 | CDS  |
| hsa-miR-6754-5p | NM_021209 | NLRC4 | 4.74E-06    | CDS  |
| hsa-miR-6754-3p | NM_021209 | NLRC4 | 0.000669213 | CDS  |
| hsa-miR-6754-3p | NM_021209 | NLRC4 | 0.00561403  | CDS  |

|                 |           |       |             |      |
|-----------------|-----------|-------|-------------|------|
| hsa-miR-6754-3p | NM_021209 | NLRC4 | 2.98E-05    | CDS  |
| hsa-miR-6755-5p | NM_021209 | NLRC4 | 0.008674456 | 5UTR |
| hsa-miR-6756-5p | NM_021209 | NLRC4 | 0.004916043 | 5UTR |
| hsa-miR-6756-5p | NM_021209 | NLRC4 | 3.41E-07    | CDS  |
| hsa-miR-6756-3p | NM_021209 | NLRC4 | 0.000583201 | CDS  |
| hsa-miR-6757-5p | NM_021209 | NLRC4 | 0.03151826  | CDS  |
| hsa-miR-6757-5p | NM_021209 | NLRC4 | 8.25E-06    | CDS  |
| hsa-miR-6757-3p | NM_021209 | NLRC4 | 6.05E-07    | CDS  |
| hsa-miR-6757-3p | NM_021209 | NLRC4 | 0.00329055  | CDS  |
| hsa-miR-6758-5p | NM_021209 | NLRC4 | 0.000214933 | CDS  |
| hsa-miR-6758-3p | NM_021209 | NLRC4 | 1.08E-05    | CDS  |
| hsa-miR-6759-3p | NM_021209 | NLRC4 | 0.004730357 | CDS  |
| hsa-miR-6760-5p | NM_021209 | NLRC4 | 4.03E-06    | CDS  |
| hsa-miR-6760-3p | NM_021209 | NLRC4 | 3.07E-05    | CDS  |
| hsa-miR-6760-3p | NM_021209 | NLRC4 | 0.004370877 | CDS  |
| hsa-miR-6761-5p | NM_021209 | NLRC4 | 5.71E-06    | CDS  |
| hsa-miR-6761-3p | NM_021209 | NLRC4 | 0.004577843 | CDS  |
| hsa-miR-6761-3p | NM_021209 | NLRC4 | 0.000245493 | CDS  |
| hsa-miR-6762-5p | NM_021209 | NLRC4 | 3.17E-07    | CDS  |
| hsa-miR-6762-5p | NM_021209 | NLRC4 | 0.001516459 | CDS  |
| hsa-miR-6762-3p | NM_021209 | NLRC4 | 4.78E-06    | CDS  |
| hsa-miR-6762-3p | NM_021209 | NLRC4 | 5.14E-05    | CDS  |
| hsa-miR-6762-3p | NM_021209 | NLRC4 | 0.000963264 | CDS  |
| hsa-miR-6762-3p | NM_021209 | NLRC4 | 0.006628845 | CDS  |
| hsa-miR-6763-5p | NM_021209 | NLRC4 | 0.1399983   | CDS  |
| hsa-miR-6763-5p | NM_021209 | NLRC4 | 0.08241963  | CDS  |
| hsa-miR-6763-5p | NM_021209 | NLRC4 | 0.000511852 | CDS  |
| hsa-miR-6763-5p | NM_021209 | NLRC4 | 0.001372911 | CDS  |
| hsa-miR-6763-3p | NM_021209 | NLRC4 | 0.000106281 | CDS  |
| hsa-miR-6763-3p | NM_021209 | NLRC4 | 0.004422789 | CDS  |
| hsa-miR-6764-5p | NM_021209 | NLRC4 | 1.23E-05    | CDS  |
| hsa-miR-6764-5p | NM_021209 | NLRC4 | 2.23E-07    | CDS  |
| hsa-miR-6764-3p | NM_021209 | NLRC4 | 4.79E-06    | CDS  |
| hsa-miR-6765-5p | NM_021209 | NLRC4 | 2.13E-05    | CDS  |
| hsa-miR-6765-3p | NM_021209 | NLRC4 | 1.46E-05    | CDS  |
| hsa-miR-6765-3p | NM_021209 | NLRC4 | 8.53E-06    | CDS  |
| hsa-miR-6766-5p | NM_021209 | NLRC4 | 0.000345859 | CDS  |
| hsa-miR-6766-5p | NM_021209 | NLRC4 | 6.21E-05    | CDS  |
| hsa-miR-6766-3p | NM_021209 | NLRC4 | 0.009171114 | CDS  |
| hsa-miR-6767-5p | NM_021209 | NLRC4 | 0.000605168 | CDS  |
| hsa-miR-6767-3p | NM_021209 | NLRC4 | 3.57E-05    | CDS  |
| hsa-miR-6767-3p | NM_021209 | NLRC4 | 0.001972862 | CDS  |
| hsa-miR-6767-3p | NM_021209 | NLRC4 | 2.88E-05    | CDS  |
| hsa-miR-6768-5p | NM_021209 | NLRC4 | 0.03650309  | 5UTR |

|                  |           |       |             |      |
|------------------|-----------|-------|-------------|------|
| hsa-miR-6768-5p  | NM_021209 | NLRC4 | 5.90E-05    | CDS  |
| hsa-miR-6769a-5p | NM_021209 | NLRC4 | 0.003558933 | CDS  |
| hsa-miR-6769a-5p | NM_021209 | NLRC4 | 0.08871414  | CDS  |
| hsa-miR-6769a-5p | NM_021209 | NLRC4 | 0.04450285  | CDS  |
| hsa-miR-6770-5p  | NM_021209 | NLRC4 | 0.004509441 | CDS  |
| hsa-miR-6770-3p  | NM_021209 | NLRC4 | 1.16E-05    | CDS  |
| hsa-miR-6770-3p  | NM_021209 | NLRC4 | 0.003473051 | CDS  |
| hsa-miR-6770-3p  | NM_021209 | NLRC4 | 0.003651178 | CDS  |
| hsa-miR-6771-5p  | NM_021209 | NLRC4 | 6.44E-05    | CDS  |
| hsa-miR-6771-5p  | NM_021209 | NLRC4 | 0.002587252 | 5UTR |
| hsa-miR-6772-5p  | NM_021209 | NLRC4 | 0.000608953 | CDS  |
| hsa-miR-6772-5p  | NM_021209 | NLRC4 | 7.36E-05    | CDS  |
| hsa-miR-6772-5p  | NM_021209 | NLRC4 | 0.000855203 | CDS  |
| hsa-miR-6772-3p  | NM_021209 | NLRC4 | 0.000362454 | CDS  |
| hsa-miR-6772-3p  | NM_021209 | NLRC4 | 0.001519754 | CDS  |
| hsa-miR-6773-5p  | NM_021209 | NLRC4 | 0.000132382 | CDS  |
| hsa-miR-6773-5p  | NM_021209 | NLRC4 | 0.003230363 | 5UTR |
| hsa-miR-6773-5p  | NM_021209 | NLRC4 | 1.46E-05    | CDS  |
| hsa-miR-6773-5p  | NM_021209 | NLRC4 | 2.55E-05    | CDS  |
| hsa-miR-6773-3p  | NM_021209 | NLRC4 | 0.009187106 | CDS  |
| hsa-miR-6774-3p  | NM_021209 | NLRC4 | 0.008234576 | CDS  |
| hsa-miR-6775-5p  | NM_021209 | NLRC4 | 0.000671559 | CDS  |
| hsa-miR-6775-5p  | NM_021209 | NLRC4 | 3.17E-07    | CDS  |
| hsa-miR-6775-3p  | NM_021209 | NLRC4 | 0.00037471  | CDS  |
| hsa-miR-6776-5p  | NM_021209 | NLRC4 | 0.2724825   | CDS  |
| hsa-miR-6776-5p  | NM_021209 | NLRC4 | 0.000671587 | 5UTR |
| hsa-miR-6777-5p  | NM_021209 | NLRC4 | 0.0264118   | CDS  |
| hsa-miR-6777-5p  | NM_021209 | NLRC4 | 1.49E-05    | CDS  |
| hsa-miR-6777-5p  | NM_021209 | NLRC4 | 0.00237631  | CDS  |
| hsa-miR-6777-3p  | NM_021209 | NLRC4 | 6.44E-07    | CDS  |
| hsa-miR-6777-3p  | NM_021209 | NLRC4 | 4.89E-06    | CDS  |
| hsa-miR-6778-5p  | NM_021209 | NLRC4 | 0.000345859 | CDS  |
| hsa-miR-6778-5p  | NM_021209 | NLRC4 | 0.02308038  | CDS  |
| hsa-miR-6778-5p  | NM_021209 | NLRC4 | 0.000274924 | CDS  |
| hsa-miR-6778-3p  | NM_021209 | NLRC4 | 1.43E-05    | CDS  |
| hsa-miR-6778-3p  | NM_021209 | NLRC4 | 0.000196593 | CDS  |
| hsa-miR-6779-5p  | NM_021209 | NLRC4 | 0.009056833 | CDS  |
| hsa-miR-6779-5p  | NM_021209 | NLRC4 | 0.1399983   | CDS  |
| hsa-miR-6779-5p  | NM_021209 | NLRC4 | 0.08241963  | CDS  |
| hsa-miR-6779-5p  | NM_021209 | NLRC4 | 0.000135949 | CDS  |
| hsa-miR-6779-3p  | NM_021209 | NLRC4 | 1.46E-05    | CDS  |
| hsa-miR-6779-3p  | NM_021209 | NLRC4 | 1.61E-05    | CDS  |
| hsa-miR-6780a-3p | NM_021209 | NLRC4 | 0.000123249 | CDS  |
| hsa-miR-6781-5p  | NM_021209 | NLRC4 | 2.55E-05    | CDS  |

|                 |           |       |             |      |
|-----------------|-----------|-------|-------------|------|
| hsa-miR-6781-5p | NM_021209 | NLRC4 | 0.005727952 | 5UTR |
| hsa-miR-6781-3p | NM_021209 | NLRC4 | 0.000326687 | CDS  |
| hsa-miR-6782-5p | NM_021209 | NLRC4 | 9.25E-07    | CDS  |
| hsa-miR-6782-5p | NM_021209 | NLRC4 | 0.005727952 | 5UTR |
| hsa-miR-6782-3p | NM_021209 | NLRC4 | 0.000166253 | CDS  |
| hsa-miR-6782-3p | NM_021209 | NLRC4 | 0.00015002  | CDS  |
| hsa-miR-6783-5p | NM_021209 | NLRC4 | 0.01246415  | CDS  |
| hsa-miR-6783-5p | NM_021209 | NLRC4 | 0.000139508 | CDS  |
| hsa-miR-6783-3p | NM_021209 | NLRC4 | 0.06177347  | CDS  |
| hsa-miR-6783-3p | NM_021209 | NLRC4 | 0.000583201 | CDS  |
| hsa-miR-6784-5p | NM_021209 | NLRC4 | 0.006363825 | 5UTR |
| hsa-miR-6784-5p | NM_021209 | NLRC4 | 1.00E-06    | CDS  |
| hsa-miR-6784-5p | NM_021209 | NLRC4 | 6.15E-05    | CDS  |
| hsa-miR-6785-5p | NM_021209 | NLRC4 | 0.000142999 | CDS  |
| hsa-miR-6785-3p | NM_021209 | NLRC4 | 3.57E-05    | CDS  |
| hsa-miR-6785-3p | NM_021209 | NLRC4 | 0.000239915 | CDS  |
| hsa-miR-6786-5p | NM_021209 | NLRC4 | 1.85E-05    | CDS  |
| hsa-miR-6786-5p | NM_021209 | NLRC4 | 0.000724533 | CDS  |
| hsa-miR-6786-3p | NM_021209 | NLRC4 | 0.000542025 | CDS  |
| hsa-miR-6786-3p | NM_021209 | NLRC4 | 0.04142576  | CDS  |
| hsa-miR-6787-5p | NM_021209 | NLRC4 | 1.00E-06    | CDS  |
| hsa-miR-6787-5p | NM_021209 | NLRC4 | 9.39E-05    | CDS  |
| hsa-miR-6787-5p | NM_021209 | NLRC4 | 0.001644724 | CDS  |
| hsa-miR-6787-3p | NM_021209 | NLRC4 | 0.007691023 | CDS  |
| hsa-miR-6787-3p | NM_021209 | NLRC4 | 4.59E-06    | CDS  |
| hsa-miR-6789-3p | NM_021209 | NLRC4 | 0.00151455  | CDS  |
| hsa-miR-6789-3p | NM_021209 | NLRC4 | 0.001218159 | CDS  |
| hsa-miR-6790-5p | NM_021209 | NLRC4 | 0.002220645 | 5UTR |
| hsa-miR-6790-5p | NM_021209 | NLRC4 | 0.08189838  | CDS  |
| hsa-miR-6790-3p | NM_021209 | NLRC4 | 0.000262096 | 5UTR |
| hsa-miR-6790-3p | NM_021209 | NLRC4 | 7.68E-06    | CDS  |
| hsa-miR-6791-5p | NM_021209 | NLRC4 | 6.33E-06    | CDS  |
| hsa-miR-6791-5p | NM_021209 | NLRC4 | 7.16E-06    | CDS  |
| hsa-miR-6791-5p | NM_021209 | NLRC4 | 2.23E-07    | CDS  |
| hsa-miR-6791-3p | NM_021209 | NLRC4 | 5.25E-05    | CDS  |
| hsa-miR-6791-3p | NM_021209 | NLRC4 | 0.000612062 | CDS  |
| hsa-miR-6792-5p | NM_021209 | NLRC4 | 1.00E-06    | CDS  |
| hsa-miR-6792-5p | NM_021209 | NLRC4 | 0.002220645 | 5UTR |
| hsa-miR-6792-3p | NM_021209 | NLRC4 | 0.004422789 | CDS  |
| hsa-miR-6792-3p | NM_021209 | NLRC4 | 0.000225565 | CDS  |
| hsa-miR-6793-5p | NM_021209 | NLRC4 | 0.006363825 | 5UTR |
| hsa-miR-6793-5p | NM_021209 | NLRC4 | 0.03365704  | CDS  |
| hsa-miR-6793-3p | NM_021209 | NLRC4 | 8.38E-06    | CDS  |
| hsa-miR-6794-5p | NM_021209 | NLRC4 | 0.001661235 | CDS  |

|                 |           |       |             |      |
|-----------------|-----------|-------|-------------|------|
| hsa-miR-6795-5p | NM_021209 | NLRC4 | 0.01000834  | CDS  |
| hsa-miR-6796-5p | NM_021209 | NLRC4 | 1.19E-06    | CDS  |
| hsa-miR-6796-5p | NM_021209 | NLRC4 | 4.42E-05    | CDS  |
| hsa-miR-6796-3p | NM_021209 | NLRC4 | 0.000963264 | CDS  |
| hsa-miR-6797-5p | NM_021209 | NLRC4 | 0.03545045  | CDS  |
| hsa-miR-6798-5p | NM_021209 | NLRC4 | 0.005846554 | 5UTR |
| hsa-miR-6798-5p | NM_021209 | NLRC4 | 0.03498518  | CDS  |
| hsa-miR-6798-5p | NM_021209 | NLRC4 | 9.25E-07    | CDS  |
| hsa-miR-6798-5p | NM_021209 | NLRC4 | 0.008073378 | CDS  |
| hsa-miR-6798-3p | NM_021209 | NLRC4 | 0.006567177 | CDS  |
| hsa-miR-6799-5p | NM_021209 | NLRC4 | 0.000598122 | CDS  |
| hsa-miR-6799-5p | NM_021209 | NLRC4 | 0.005727952 | 5UTR |
| hsa-miR-6799-5p | NM_021209 | NLRC4 | 0.02837663  | CDS  |
| hsa-miR-6799-3p | NM_021209 | NLRC4 | 8.12E-06    | CDS  |
| hsa-miR-6799-3p | NM_021209 | NLRC4 | 7.95E-06    | CDS  |
| hsa-miR-6799-3p | NM_021209 | NLRC4 | 0.001202897 | CDS  |
| hsa-miR-6800-5p | NM_021209 | NLRC4 | 1.39E-05    | CDS  |
| hsa-miR-6800-5p | NM_021209 | NLRC4 | 0.002942794 | 5UTR |
| hsa-miR-6800-3p | NM_021209 | NLRC4 | 0.000802077 | CDS  |
| hsa-miR-6801-5p | NM_021209 | NLRC4 | 0.000605168 | CDS  |
| hsa-miR-6801-3p | NM_021209 | NLRC4 | 0.000612062 | CDS  |
| hsa-miR-6801-3p | NM_021209 | NLRC4 | 0.000196593 | CDS  |
| hsa-miR-6802-5p | NM_021209 | NLRC4 | 0.1399983   | CDS  |
| hsa-miR-6802-5p | NM_021209 | NLRC4 | 0.01105221  | CDS  |
| hsa-miR-6802-3p | NM_021209 | NLRC4 | 0.008234576 | CDS  |
| hsa-miR-6802-3p | NM_021209 | NLRC4 | 0.000612062 | CDS  |
| hsa-miR-6803-5p | NM_021209 | NLRC4 | 0.01083776  | 5UTR |
| hsa-miR-6803-3p | NM_021209 | NLRC4 | 0.000583201 | CDS  |
| hsa-miR-6803-3p | NM_021209 | NLRC4 | 0.000106281 | CDS  |
| hsa-miR-6804-5p | NM_021209 | NLRC4 | 0.001239845 | CDS  |
| hsa-miR-6804-3p | NM_021209 | NLRC4 | 2.28E-05    | CDS  |
| hsa-miR-6805-5p | NM_021209 | NLRC4 | 2.97E-05    | 5UTR |
| hsa-miR-6805-5p | NM_021209 | NLRC4 | 9.62E-07    | CDS  |
| hsa-miR-6805-3p | NM_021209 | NLRC4 | 0.04729951  | CDS  |
| hsa-miR-6806-5p | NM_021209 | NLRC4 | 0.000235798 | CDS  |
| hsa-miR-6806-5p | NM_021209 | NLRC4 | 0.006363825 | 5UTR |
| hsa-miR-6806-3p | NM_021209 | NLRC4 | 1.10E-08    | CDS  |
| hsa-miR-6806-3p | NM_021209 | NLRC4 | 0.000233688 | CDS  |
| hsa-miR-6806-3p | NM_021209 | NLRC4 | 0.000272475 | CDS  |
| hsa-miR-6807-5p | NM_021209 | NLRC4 | 0.001956377 | 5UTR |
| hsa-miR-6807-3p | NM_021209 | NLRC4 | 0.01106226  | CDS  |
| hsa-miR-6807-3p | NM_021209 | NLRC4 | 2.28E-05    | CDS  |
| hsa-miR-6807-3p | NM_021209 | NLRC4 | 0.001519754 | CDS  |
| hsa-miR-6808-5p | NM_021209 | NLRC4 | 0.001170791 | CDS  |

|                 |           |       |             |      |
|-----------------|-----------|-------|-------------|------|
| hsa-miR-6808-5p | NM_021209 | NLRC4 | 0.000230589 | CDS  |
| hsa-miR-6808-5p | NM_021209 | NLRC4 | 1.54E-05    | CDS  |
| hsa-miR-6808-3p | NM_021209 | NLRC4 | 7.92E-05    | CDS  |
| hsa-miR-6809-5p | NM_021209 | NLRC4 | 0.0268879   | CDS  |
| hsa-miR-6810-5p | NM_021209 | NLRC4 | 0.000511852 | CDS  |
| hsa-miR-6810-5p | NM_021209 | NLRC4 | 0.001088706 | CDS  |
| hsa-miR-6810-3p | NM_021209 | NLRC4 | 0.02225154  | 5UTR |
| hsa-miR-6810-3p | NM_021209 | NLRC4 | 0.000719145 | CDS  |
| hsa-miR-6811-5p | NM_021209 | NLRC4 | 0.000165293 | CDS  |
| hsa-miR-6811-3p | NM_021209 | NLRC4 | 0.00037471  | CDS  |
| hsa-miR-6812-5p | NM_021209 | NLRC4 | 0.04053145  | CDS  |
| hsa-miR-6812-5p | NM_021209 | NLRC4 | 0.000297589 | CDS  |
| hsa-miR-6812-3p | NM_021209 | NLRC4 | 0.07413136  | 5UTR |
| hsa-miR-6813-5p | NM_021209 | NLRC4 | 9.25E-07    | CDS  |
| hsa-miR-6813-5p | NM_021209 | NLRC4 | 3.68E-05    | CDS  |
| hsa-miR-6813-3p | NM_021209 | NLRC4 | 0.004504892 | CDS  |
| hsa-miR-6814-3p | NM_021209 | NLRC4 | 0.008234576 | CDS  |
| hsa-miR-6815-5p | NM_021209 | NLRC4 | 4.03E-05    | CDS  |
| hsa-miR-6815-5p | NM_021209 | NLRC4 | 2.91E-05    | 5UTR |
| hsa-miR-6815-3p | NM_021209 | NLRC4 | 1.47E-05    | CDS  |
| hsa-miR-6815-3p | NM_021209 | NLRC4 | 7.51E-05    | CDS  |
| hsa-miR-6816-5p | NM_021209 | NLRC4 | 0.003007178 | 5UTR |
| hsa-miR-6816-5p | NM_021209 | NLRC4 | 0.000235798 | CDS  |
| hsa-miR-6816-5p | NM_021209 | NLRC4 | 0.03847363  | CDS  |
| hsa-miR-6817-5p | NM_021209 | NLRC4 | 2.68E-06    | CDS  |
| hsa-miR-6817-3p | NM_021209 | NLRC4 | 0.000719145 | CDS  |
| hsa-miR-6818-5p | NM_021209 | NLRC4 | 0.001053639 | CDS  |
| hsa-miR-6818-3p | NM_021209 | NLRC4 | 0.04729951  | CDS  |
| hsa-miR-6819-5p | NM_021209 | NLRC4 | 3.17E-07    | CDS  |
| hsa-miR-6819-5p | NM_021209 | NLRC4 | 0.000834806 | CDS  |
| hsa-miR-6819-5p | NM_021209 | NLRC4 | 0.000608953 | CDS  |
| hsa-miR-6819-3p | NM_021209 | NLRC4 | 0.000542025 | CDS  |
| hsa-miR-6820-5p | NM_021209 | NLRC4 | 0.1222725   | CDS  |
| hsa-miR-6820-5p | NM_021209 | NLRC4 | 0.02113113  | CDS  |
| hsa-miR-6820-5p | NM_021209 | NLRC4 | 0.008824709 | CDS  |
| hsa-miR-6820-3p | NM_021209 | NLRC4 | 0.000123515 | CDS  |
| hsa-miR-6820-3p | NM_021209 | NLRC4 | 0.03794919  | CDS  |
| hsa-miR-6820-3p | NM_021209 | NLRC4 | 5.56E-06    | CDS  |
| hsa-miR-6821-5p | NM_021209 | NLRC4 | 2.73E-06    | CDS  |
| hsa-miR-6821-5p | NM_021209 | NLRC4 | 1.35E-06    | CDS  |
| hsa-miR-6821-5p | NM_021209 | NLRC4 | 1.39E-05    | CDS  |
| hsa-miR-6821-3p | NM_021209 | NLRC4 | 0.000215389 | CDS  |
| hsa-miR-6822-5p | NM_021209 | NLRC4 | 0.000956925 | CDS  |
| hsa-miR-6823-5p | NM_021209 | NLRC4 | 0.06687653  | CDS  |

|                  |           |       |             |      |
|------------------|-----------|-------|-------------|------|
| hsa-miR-6823-5p  | NM_021209 | NLRC4 | 0.007047336 | CDS  |
| hsa-miR-6823-5p  | NM_021209 | NLRC4 | 0.005846554 | 5UTR |
| hsa-miR-6823-3p  | NM_021209 | NLRC4 | 2.79E-05    | CDS  |
| hsa-miR-6823-3p  | NM_021209 | NLRC4 | 0.000630286 | CDS  |
| hsa-miR-6824-5p  | NM_021209 | NLRC4 | 1.00E-06    | CDS  |
| hsa-miR-6824-3p  | NM_021209 | NLRC4 | 0.01411228  | CDS  |
| hsa-miR-6825-5p  | NM_021209 | NLRC4 | 0.08871414  | CDS  |
| hsa-miR-6825-5p  | NM_021209 | NLRC4 | 0.000142999 | CDS  |
| hsa-miR-6825-5p  | NM_021209 | NLRC4 | 0.001239845 | CDS  |
| hsa-miR-6825-3p  | NM_021209 | NLRC4 | 2.28E-05    | CDS  |
| hsa-miR-6825-3p  | NM_021209 | NLRC4 | 0.01228227  | CDS  |
| hsa-miR-6826-5p  | NM_021209 | NLRC4 | 0.02668285  | CDS  |
| hsa-miR-6826-5p  | NM_021209 | NLRC4 | 6.00E-05    | CDS  |
| hsa-miR-6826-3p  | NM_021209 | NLRC4 | 0.000225565 | CDS  |
| hsa-miR-6826-3p  | NM_021209 | NLRC4 | 0.000583201 | CDS  |
| hsa-miR-6826-3p  | NM_021209 | NLRC4 | 0.000123249 | CDS  |
| hsa-miR-6827-5p  | NM_021209 | NLRC4 | 0.000142999 | CDS  |
| hsa-miR-6827-5p  | NM_021209 | NLRC4 | 2.09E-06    | CDS  |
| hsa-miR-6827-3p  | NM_021209 | NLRC4 | 0.02047911  | CDS  |
| hsa-miR-6828-5p  | NM_021209 | NLRC4 | 0.00180674  | CDS  |
| hsa-miR-6828-3p  | NM_021209 | NLRC4 | 0.04682227  | 5UTR |
| hsa-miR-6828-3p  | NM_021209 | NLRC4 | 0.007691023 | CDS  |
| hsa-miR-6829-5p  | NM_021209 | NLRC4 | 0.000297589 | CDS  |
| hsa-miR-6829-5p  | NM_021209 | NLRC4 | 0.000294775 | CDS  |
| hsa-miR-6829-3p  | NM_021209 | NLRC4 | 0.003672413 | CDS  |
| hsa-miR-6829-3p  | NM_021209 | NLRC4 | 7.69E-05    | CDS  |
| hsa-miR-6829-3p  | NM_021209 | NLRC4 | 1.82E-05    | CDS  |
| hsa-miR-6830-5p  | NM_021209 | NLRC4 | 0.07138354  | CDS  |
| hsa-miR-6830-3p  | NM_021209 | NLRC4 | 0.1045722   | CDS  |
| hsa-miR-6830-3p  | NM_021209 | NLRC4 | 0.001206662 | CDS  |
| hsa-miR-6831-5p  | NM_021209 | NLRC4 | 0.0264118   | CDS  |
| hsa-miR-6831-5p  | NM_021209 | NLRC4 | 4.06E-07    | CDS  |
| hsa-miR-6833-5p  | NM_021209 | NLRC4 | 0.09125359  | CDS  |
| hsa-miR-6833-5p  | NM_021209 | NLRC4 | 0.1914291   | CDS  |
| hsa-miR-6833-3p  | NM_021209 | NLRC4 | 0.000199878 | CDS  |
| hsa-miR-6833-3p  | NM_021209 | NLRC4 | 0.000143515 | CDS  |
| hsa-miR-6834-5p  | NM_021209 | NLRC4 | 0.01058857  | CDS  |
| hsa-miR-6834-5p  | NM_021209 | NLRC4 | 2.48E-06    | CDS  |
| hsa-miR-6834-3p  | NM_021209 | NLRC4 | 0.009171114 | CDS  |
| hsa-miR-6834-3p  | NM_021209 | NLRC4 | 0.008510362 | CDS  |
| hsa-miR-6834-3p  | NM_021209 | NLRC4 | 0.000319363 | 5UTR |
| hsa-miR-6835-3p  | NM_021209 | NLRC4 | 2.59E-05    | CDS  |
| hsa-miR-6780b-5p | NM_021209 | NLRC4 | 0.02261598  | CDS  |
| hsa-miR-6780b-5p | NM_021209 | NLRC4 | 1.13E-05    | CDS  |



|                  |           |       |             |      |
|------------------|-----------|-------|-------------|------|
| hsa-miR-6780b-5p | NM_021209 | NLRC4 | 0.0696302   | CDS  |
| hsa-miR-6780b-3p | NM_021209 | NLRC4 | 0.000612062 | CDS  |
| hsa-miR-6780b-3p | NM_021209 | NLRC4 | 0.009331195 | CDS  |
| hsa-miR-6836-5p  | NM_021209 | NLRC4 | 2.59E-05    | CDS  |
| hsa-miR-6836-5p  | NM_021209 | NLRC4 | 0.006363825 | 5UTR |
| hsa-miR-6836-5p  | NM_021209 | NLRC4 | 1.49E-05    | CDS  |
| hsa-miR-6836-3p  | NM_021209 | NLRC4 | 2.92E-05    | CDS  |
| hsa-miR-6836-3p  | NM_021209 | NLRC4 | 4.84E-07    | CDS  |
| hsa-miR-6836-3p  | NM_021209 | NLRC4 | 8.94E-05    | CDS  |
| hsa-miR-6837-5p  | NM_021209 | NLRC4 | 0.001670037 | CDS  |
| hsa-miR-6837-5p  | NM_021209 | NLRC4 | 7.18E-05    | CDS  |
| hsa-miR-6837-3p  | NM_021209 | NLRC4 | 0.00095499  | CDS  |
| hsa-miR-6837-3p  | NM_021209 | NLRC4 | 0.003065349 | CDS  |
| hsa-miR-6837-3p  | NM_021209 | NLRC4 | 0.00561403  | CDS  |
| hsa-miR-6838-5p  | NM_021209 | NLRC4 | 4.93E-05    | CDS  |
| hsa-miR-6838-3p  | NM_021209 | NLRC4 | 4.96E-05    | CDS  |
| hsa-miR-6838-3p  | NM_021209 | NLRC4 | 0.000542111 | CDS  |
| hsa-miR-6838-3p  | NM_021209 | NLRC4 | 0.000248086 | CDS  |
| hsa-miR-6838-3p  | NM_021209 | NLRC4 | 6.20E-05    | CDS  |
| hsa-miR-6839-5p  | NM_021209 | NLRC4 | 0.02595679  | CDS  |
| hsa-miR-6839-5p  | NM_021209 | NLRC4 | 0.002919858 | 5UTR |
| hsa-miR-6839-3p  | NM_021209 | NLRC4 | 0.003503197 | CDS  |
| hsa-miR-6840-5p  | NM_021209 | NLRC4 | 0.003963322 | CDS  |
| hsa-miR-6840-3p  | NM_021209 | NLRC4 | 6.23E-05    | 5UTR |
| hsa-miR-6841-5p  | NM_021209 | NLRC4 | 6.21E-05    | CDS  |
| hsa-miR-6841-5p  | NM_021209 | NLRC4 | 0.000264029 | CDS  |
| hsa-miR-6841-3p  | NM_021209 | NLRC4 | 0.00027781  | CDS  |
| hsa-miR-6842-5p  | NM_021209 | NLRC4 | 4.95E-07    | CDS  |
| hsa-miR-6842-5p  | NM_021209 | NLRC4 | 0.000511852 | CDS  |
| hsa-miR-6842-5p  | NM_021209 | NLRC4 | 0.01247752  | CDS  |
| hsa-miR-6842-3p  | NM_021209 | NLRC4 | 0.001503355 | CDS  |
| hsa-miR-6842-3p  | NM_021209 | NLRC4 | 0.008288481 | CDS  |
| hsa-miR-6842-3p  | NM_021209 | NLRC4 | 1.35E-05    | CDS  |
| hsa-miR-6842-3p  | NM_021209 | NLRC4 | 0.000953849 | CDS  |
| hsa-miR-6843-3p  | NM_021209 | NLRC4 | 0.000324703 | CDS  |
| hsa-miR-6843-3p  | NM_021209 | NLRC4 | 0.000285159 | CDS  |
| hsa-miR-6845-5p  | NM_021209 | NLRC4 | 9.56E-06    | CDS  |
| hsa-miR-6845-3p  | NM_021209 | NLRC4 | 0.05096433  | 5UTR |
| hsa-miR-6846-5p  | NM_021209 | NLRC4 | 0.04340877  | CDS  |
| hsa-miR-6846-5p  | NM_021209 | NLRC4 | 0.2077442   | CDS  |
| hsa-miR-6846-5p  | NM_021209 | NLRC4 | 0.000511852 | CDS  |
| hsa-miR-6846-3p  | NM_021209 | NLRC4 | 0.0210857   | CDS  |
| hsa-miR-6847-5p  | NM_021209 | NLRC4 | 0.000166471 | 5UTR |
| hsa-miR-6847-5p  | NM_021209 | NLRC4 | 5.44E-05    | 5UTR |

|                  |           |       |             |      |
|------------------|-----------|-------|-------------|------|
| hsa-miR-6847-3p  | NM_021209 | NLRC4 | 0.02194376  | CDS  |
| hsa-miR-6848-5p  | NM_021209 | NLRC4 | 0.000511852 | CDS  |
| hsa-miR-6848-5p  | NM_021209 | NLRC4 | 9.62E-07    | CDS  |
| hsa-miR-6848-5p  | NM_021209 | NLRC4 | 0.006212097 | 5UTR |
| hsa-miR-6848-3p  | NM_021209 | NLRC4 | 7.19E-05    | CDS  |
| hsa-miR-6849-5p  | NM_021209 | NLRC4 | 0.009417785 | CDS  |
| hsa-miR-6849-5p  | NM_021209 | NLRC4 | 0.03110691  | CDS  |
| hsa-miR-6849-3p  | NM_021209 | NLRC4 | 0.006567177 | CDS  |
| hsa-miR-6849-3p  | NM_021209 | NLRC4 | 0.000233119 | 5UTR |
| hsa-miR-6849-3p  | NM_021209 | NLRC4 | 6.06E-05    | CDS  |
| hsa-miR-6850-5p  | NM_021209 | NLRC4 | 1.39E-05    | CDS  |
| hsa-miR-6850-5p  | NM_021209 | NLRC4 | 0.000345859 | CDS  |
| hsa-miR-6850-3p  | NM_021209 | NLRC4 | 1.83E-05    | CDS  |
| hsa-miR-6850-3p  | NM_021209 | NLRC4 | 6.15E-05    | CDS  |
| hsa-miR-6851-5p  | NM_021209 | NLRC4 | 1.00E-06    | CDS  |
| hsa-miR-6851-5p  | NM_021209 | NLRC4 | 0.08802059  | CDS  |
| hsa-miR-6851-5p  | NM_021209 | NLRC4 | 0.002744245 | 5UTR |
| hsa-miR-6851-3p  | NM_021209 | NLRC4 | 0.000612062 | CDS  |
| hsa-miR-6852-5p  | NM_021209 | NLRC4 | 0.002217478 | CDS  |
| hsa-miR-6852-5p  | NM_021209 | NLRC4 | 0.02225154  | 5UTR |
| hsa-miR-6852-3p  | NM_021209 | NLRC4 | 0.02033551  | CDS  |
| hsa-miR-6853-5p  | NM_021209 | NLRC4 | 0.004588791 | CDS  |
| hsa-miR-6853-5p  | NM_021209 | NLRC4 | 0.000357171 | CDS  |
| hsa-miR-6854-3p  | NM_021209 | NLRC4 | 0.01228227  | CDS  |
| hsa-miR-6855-5p  | NM_021209 | NLRC4 | 0.000478711 | CDS  |
| hsa-miR-6855-5p  | NM_021209 | NLRC4 | 0.004916043 | 5UTR |
| hsa-miR-6856-5p  | NM_021209 | NLRC4 | 0.005224415 | CDS  |
| hsa-miR-6856-5p  | NM_021209 | NLRC4 | 0.00237631  | CDS  |
| hsa-miR-6856-3p  | NM_021209 | NLRC4 | 3.55E-05    | CDS  |
| hsa-miR-6857-5p  | NM_021209 | NLRC4 | 0.000511852 | CDS  |
| hsa-miR-6857-5p  | NM_021209 | NLRC4 | 0.000511852 | CDS  |
| hsa-miR-6857-5p  | NM_021209 | NLRC4 | 0.03847363  | CDS  |
| hsa-miR-6857-3p  | NM_021209 | NLRC4 | 2.06E-05    | CDS  |
| hsa-miR-6857-3p  | NM_021209 | NLRC4 | 0.000103244 | CDS  |
| hsa-miR-6857-3p  | NM_021209 | NLRC4 | 0.006712235 | CDS  |
| hsa-miR-6858-5p  | NM_021209 | NLRC4 | 0.009417785 | CDS  |
| hsa-miR-6858-5p  | NM_021209 | NLRC4 | 0.002220645 | 5UTR |
| hsa-miR-6858-3p  | NM_021209 | NLRC4 | 0.001172201 | CDS  |
| hsa-miR-6858-3p  | NM_021209 | NLRC4 | 2.79E-05    | CDS  |
| hsa-miR-6858-3p  | NM_021209 | NLRC4 | 0.000170659 | CDS  |
| hsa-miR-6859-5p  | NM_021209 | NLRC4 | 0.01069605  | CDS  |
| hsa-miR-6859-5p  | NM_021209 | NLRC4 | 0.000654256 | CDS  |
| hsa-miR-6859-3p  | NM_021209 | NLRC4 | 5.54E-06    | CDS  |
| hsa-miR-6769b-5p | NM_021209 | NLRC4 | 0.002365478 | CDS  |

|                  |           |       |             |      |
|------------------|-----------|-------|-------------|------|
| hsa-miR-6769b-5p | NM_021209 | NLRC4 | 0.008120752 | CDS  |
| hsa-miR-6769b-3p | NM_021209 | NLRC4 | 0.000225565 | CDS  |
| hsa-miR-6860     | NM_021209 | NLRC4 | 1.92E-06    | CDS  |
| hsa-miR-6860     | NM_021209 | NLRC4 | 0.00216149  | CDS  |
| hsa-miR-6860     | NM_021209 | NLRC4 | 0.1399983   | CDS  |
| hsa-miR-6861-5p  | NM_021209 | NLRC4 | 0.1399983   | CDS  |
| hsa-miR-6861-5p  | NM_021209 | NLRC4 | 0.08241963  | CDS  |
| hsa-miR-6862-5p  | NM_021209 | NLRC4 | 0.000671559 | CDS  |
| hsa-miR-6863     | NM_021209 | NLRC4 | 0.00293663  | CDS  |
| hsa-miR-6863     | NM_021209 | NLRC4 | 0.009417785 | CDS  |
| hsa-miR-6864-3p  | NM_021209 | NLRC4 | 0.000357171 | CDS  |
| hsa-miR-6865-5p  | NM_021209 | NLRC4 | 0.001023348 | CDS  |
| hsa-miR-6866-5p  | NM_021209 | NLRC4 | 0.04340877  | CDS  |
| hsa-miR-6866-3p  | NM_021209 | NLRC4 | 0.007176909 | 5UTR |
| hsa-miR-6866-3p  | NM_021209 | NLRC4 | 0.00199289  | CDS  |
| hsa-miR-6867-5p  | NM_021209 | NLRC4 | 0.03296809  | CDS  |
| hsa-miR-6868-3p  | NM_021209 | NLRC4 | 0.004537093 | CDS  |
| hsa-miR-6868-3p  | NM_021209 | NLRC4 | 0.0037024   | CDS  |
| hsa-miR-6868-3p  | NM_021209 | NLRC4 | 1.08E-05    | CDS  |
| hsa-miR-6869-5p  | NM_021209 | NLRC4 | 1.97E-05    | CDS  |
| hsa-miR-6869-5p  | NM_021209 | NLRC4 | 0.002220645 | 5UTR |
| hsa-miR-6869-3p  | NM_021209 | NLRC4 | 1.77E-06    | CDS  |
| hsa-miR-6870-5p  | NM_021209 | NLRC4 | 0.2077442   | CDS  |
| hsa-miR-6870-5p  | NM_021209 | NLRC4 | 0.1188673   | CDS  |
| hsa-miR-6870-5p  | NM_021209 | NLRC4 | 0.000297589 | CDS  |
| hsa-miR-6870-3p  | NM_021209 | NLRC4 | 0.008234576 | CDS  |
| hsa-miR-6871-5p  | NM_021209 | NLRC4 | 5.90E-05    | CDS  |
| hsa-miR-6871-5p  | NM_021209 | NLRC4 | 0.000334534 | CDS  |
| hsa-miR-6871-5p  | NM_021209 | NLRC4 | 0.000142999 | CDS  |
| hsa-miR-6871-5p  | NM_021209 | NLRC4 | 4.56E-05    | CDS  |
| hsa-miR-6872-5p  | NM_021209 | NLRC4 | 0.02567779  | CDS  |
| hsa-miR-6872-5p  | NM_021209 | NLRC4 | 0.01148179  | CDS  |
| hsa-miR-6872-3p  | NM_021209 | NLRC4 | 0.000119651 | CDS  |
| hsa-miR-6872-3p  | NM_021209 | NLRC4 | 0.004370877 | CDS  |
| hsa-miR-6873-5p  | NM_021209 | NLRC4 | 0.004002253 | 5UTR |
| hsa-miR-6873-5p  | NM_021209 | NLRC4 | 0.01473863  | CDS  |
| hsa-miR-6873-3p  | NM_021209 | NLRC4 | 0.000135215 | CDS  |
| hsa-miR-6874-5p  | NM_021209 | NLRC4 | 9.56E-06    | CDS  |
| hsa-miR-6874-5p  | NM_021209 | NLRC4 | 3.68E-05    | CDS  |
| hsa-miR-6874-3p  | NM_021209 | NLRC4 | 0.01885488  | CDS  |
| hsa-miR-6874-3p  | NM_021209 | NLRC4 | 0.000272475 | CDS  |
| hsa-miR-6875-3p  | NM_021209 | NLRC4 | 0.001206662 | CDS  |
| hsa-miR-6875-3p  | NM_021209 | NLRC4 | 0.00118012  | CDS  |
| hsa-miR-6875-3p  | NM_021209 | NLRC4 | 0.02486339  | CDS  |

|                 |           |       |             |      |
|-----------------|-----------|-------|-------------|------|
| hsa-miR-6875-3p | NM_021209 | NLRC4 | 6.44E-07    | CDS  |
| hsa-miR-6876-5p | NM_021209 | NLRC4 | 0.000536357 | CDS  |
| hsa-miR-6876-5p | NM_021209 | NLRC4 | 0.0264118   | CDS  |
| hsa-miR-6876-3p | NM_021209 | NLRC4 | 0.03794919  | CDS  |
| hsa-miR-6876-3p | NM_021209 | NLRC4 | 2.18E-05    | CDS  |
| hsa-miR-6877-5p | NM_021209 | NLRC4 | 0.002224226 | CDS  |
| hsa-miR-6877-3p | NM_021209 | NLRC4 | 2.79E-05    | CDS  |
| hsa-miR-6878-5p | NM_021209 | NLRC4 | 0.000654256 | CDS  |
| hsa-miR-6878-3p | NM_021209 | NLRC4 | 0.000772438 | CDS  |
| hsa-miR-6879-5p | NM_021209 | NLRC4 | 6.00E-06    | CDS  |
| hsa-miR-6879-5p | NM_021209 | NLRC4 | 0.000144025 | CDS  |
| hsa-miR-6879-3p | NM_021209 | NLRC4 | 0.000196593 | CDS  |
| hsa-miR-6880-5p | NM_021209 | NLRC4 | 0.0268879   | CDS  |
| hsa-miR-6880-5p | NM_021209 | NLRC4 | 0.002365478 | CDS  |
| hsa-miR-6880-3p | NM_021209 | NLRC4 | 0.000447996 | CDS  |
| hsa-miR-6880-3p | NM_021209 | NLRC4 | 0.02047911  | CDS  |
| hsa-miR-6881-5p | NM_021209 | NLRC4 | 0.005727952 | 5UTR |
| hsa-miR-6881-3p | NM_021209 | NLRC4 | 0.000215389 | CDS  |
| hsa-miR-6881-3p | NM_021209 | NLRC4 | 0.000583201 | CDS  |
| hsa-miR-6881-3p | NM_021209 | NLRC4 | 0.000475498 | CDS  |
| hsa-miR-6882-5p | NM_021209 | NLRC4 | 0.002677635 | CDS  |
| hsa-miR-6883-5p | NM_021209 | NLRC4 | 0.1547776   | CDS  |
| hsa-miR-6883-5p | NM_021209 | NLRC4 | 0.0645003   | CDS  |
| hsa-miR-6883-5p | NM_021209 | NLRC4 | 1.13E-05    | CDS  |
| hsa-miR-6883-3p | NM_021209 | NLRC4 | 0.000583201 | CDS  |
| hsa-miR-6883-3p | NM_021209 | NLRC4 | 0.000106281 | CDS  |
| hsa-miR-6884-5p | NM_021209 | NLRC4 | 4.35E-05    | CDS  |
| hsa-miR-6884-3p | NM_021209 | NLRC4 | 0.000115647 | CDS  |
| hsa-miR-6884-3p | NM_021209 | NLRC4 | 0.000120074 | CDS  |
| hsa-miR-6885-5p | NM_021209 | NLRC4 | 0.000207579 | CDS  |
| hsa-miR-6885-3p | NM_021209 | NLRC4 | 0.000378314 | CDS  |
| hsa-miR-6886-5p | NM_021209 | NLRC4 | 0.000120896 | CDS  |
| hsa-miR-6886-5p | NM_021209 | NLRC4 | 0.00107409  | CDS  |
| hsa-miR-6887-5p | NM_021209 | NLRC4 | 0.000297589 | CDS  |
| hsa-miR-6887-3p | NM_021209 | NLRC4 | 0.000719145 | CDS  |
| hsa-miR-6888-5p | NM_021209 | NLRC4 | 0.000294775 | CDS  |
| hsa-miR-6888-5p | NM_021209 | NLRC4 | 0.001409008 | CDS  |
| hsa-miR-6888-3p | NM_021209 | NLRC4 | 0.05185139  | CDS  |
| hsa-miR-6889-5p | NM_021209 | NLRC4 | 0.1188673   | CDS  |
| hsa-miR-6889-3p | NM_021209 | NLRC4 | 0.01223285  | CDS  |
| hsa-miR-6889-3p | NM_021209 | NLRC4 | 0.01135416  | 5UTR |
| hsa-miR-6890-5p | NM_021209 | NLRC4 | 0.000235798 | CDS  |
| hsa-miR-6890-5p | NM_021209 | NLRC4 | 0.005727952 | 5UTR |
| hsa-miR-6890-5p | NM_021209 | NLRC4 | 0.003203264 | CDS  |

|                 |           |       |             |      |
|-----------------|-----------|-------|-------------|------|
| hsa-miR-6890-3p | NM_021209 | NLRC4 | 0.009187106 | CDS  |
| hsa-miR-6891-5p | NM_021209 | NLRC4 | 0.07765027  | CDS  |
| hsa-miR-6891-5p | NM_021209 | NLRC4 | 0.000163267 | CDS  |
| hsa-miR-6891-5p | NM_021209 | NLRC4 | 0.05553747  | CDS  |
| hsa-miR-6892-5p | NM_021209 | NLRC4 | 7.36E-05    | CDS  |
| hsa-miR-6892-5p | NM_021209 | NLRC4 | 0.001027397 | CDS  |
| hsa-miR-6892-3p | NM_021209 | NLRC4 | 0.000719145 | CDS  |
| hsa-miR-6893-5p | NM_021209 | NLRC4 | 0.000100105 | CDS  |
| hsa-miR-6893-5p | NM_021209 | NLRC4 | 9.79E-05    | CDS  |
| hsa-miR-6894-5p | NM_021209 | NLRC4 | 9.62E-07    | CDS  |
| hsa-miR-6894-5p | NM_021209 | NLRC4 | 8.25E-06    | CDS  |
| hsa-miR-6894-5p | NM_021209 | NLRC4 | 0.000598122 | CDS  |
| hsa-miR-6894-5p | NM_021209 | NLRC4 | 3.18E-05    | CDS  |
| hsa-miR-6895-5p | NM_021209 | NLRC4 | 1.49E-05    | CDS  |
| hsa-miR-6895-5p | NM_021209 | NLRC4 | 0.001727314 | CDS  |
| hsa-miR-6895-3p | NM_021209 | NLRC4 | 8.86E-07    | CDS  |
| hsa-miR-6895-3p | NM_021209 | NLRC4 | 7.53E-05    | CDS  |
| hsa-miR-6895-3p | NM_021209 | NLRC4 | 0.00042543  | CDS  |
| hsa-miR-7106-5p | NM_021209 | NLRC4 | 0.05553747  | CDS  |
| hsa-miR-7106-5p | NM_021209 | NLRC4 | 0.009044755 | CDS  |
| hsa-miR-7106-5p | NM_021209 | NLRC4 | 0.08882998  | CDS  |
| hsa-miR-7106-3p | NM_021209 | NLRC4 | 0.02569602  | 5UTR |
| hsa-miR-7106-3p | NM_021209 | NLRC4 | 0.000271085 | CDS  |
| hsa-miR-7106-3p | NM_021209 | NLRC4 | 0.000129339 | CDS  |
| hsa-miR-7107-5p | NM_021209 | NLRC4 | 4.84E-07    | CDS  |
| hsa-miR-7108-5p | NM_021209 | NLRC4 | 1.33E-05    | CDS  |
| hsa-miR-7109-5p | NM_021209 | NLRC4 | 7.85E-05    | CDS  |
| hsa-miR-7109-5p | NM_021209 | NLRC4 | 0.05383761  | CDS  |
| hsa-miR-7109-3p | NM_021209 | NLRC4 | 0.00015002  | CDS  |
| hsa-miR-7110-5p | NM_021209 | NLRC4 | 3.17E-07    | CDS  |
| hsa-miR-7110-5p | NM_021209 | NLRC4 | 0.05611306  | CDS  |
| hsa-miR-7110-3p | NM_021209 | NLRC4 | 0.000106281 | CDS  |
| hsa-miR-7111-5p | NM_021209 | NLRC4 | 0.0268879   | CDS  |
| hsa-miR-7111-5p | NM_021209 | NLRC4 | 0.003007178 | 5UTR |
| hsa-miR-7111-3p | NM_021209 | NLRC4 | 0.000583201 | CDS  |
| hsa-miR-7112-3p | NM_021209 | NLRC4 | 8.91E-06    | CDS  |
| hsa-miR-7112-3p | NM_021209 | NLRC4 | 0.02815115  | CDS  |
| hsa-miR-7113-3p | NM_021209 | NLRC4 | 0.000215389 | CDS  |
| hsa-miR-7114-5p | NM_021209 | NLRC4 | 0.000649339 | CDS  |
| hsa-miR-7114-3p | NM_021209 | NLRC4 | 0.005833398 | CDS  |
| hsa-miR-7150    | NM_021209 | NLRC4 | 0.004040886 | 5UTR |
| hsa-miR-7150    | NM_021209 | NLRC4 | 0.009056833 | CDS  |
| hsa-miR-7151-5p | NM_021209 | NLRC4 | 0.003398753 | CDS  |
| hsa-miR-7151-3p | NM_021209 | NLRC4 | 9.39E-05    | CDS  |

|                 |           |       |             |      |
|-----------------|-----------|-------|-------------|------|
| hsa-miR-7151-3p | NM_021209 | NLRC4 | 0.001033441 | CDS  |
| hsa-miR-7152-5p | NM_021209 | NLRC4 | 0.02698587  | 5UTR |
| hsa-miR-7152-5p | NM_021209 | NLRC4 | 6.20E-07    | CDS  |
| hsa-miR-7152-5p | NM_021209 | NLRC4 | 0.000352314 | CDS  |
| hsa-miR-7152-3p | NM_021209 | NLRC4 | 8.80E-06    | CDS  |
| hsa-miR-7152-3p | NM_021209 | NLRC4 | 6.19E-05    | CDS  |
| hsa-miR-7154-3p | NM_021209 | NLRC4 | 0.001831151 | CDS  |
| hsa-miR-7154-3p | NM_021209 | NLRC4 | 0.06344209  | CDS  |
| hsa-miR-7154-3p | NM_021209 | NLRC4 | 0.001014646 | CDS  |
| hsa-miR-7155-5p | NM_021209 | NLRC4 | 0.05005492  | CDS  |
| hsa-miR-7155-5p | NM_021209 | NLRC4 | 0.004474328 | CDS  |
| hsa-miR-7155-5p | NM_021209 | NLRC4 | 5.56E-06    | CDS  |
| hsa-miR-7155-3p | NM_021209 | NLRC4 | 7.76E-05    | CDS  |
| hsa-miR-7156-5p | NM_021209 | NLRC4 | 0.008149687 | CDS  |
| hsa-miR-7156-3p | NM_021209 | NLRC4 | 0.000150393 | CDS  |
| hsa-miR-7156-3p | NM_021209 | NLRC4 | 3.55E-05    | CDS  |
| hsa-miR-7156-3p | NM_021209 | NLRC4 | 0.000324004 | CDS  |
| hsa-miR-7157-5p | NM_021209 | NLRC4 | 2.75E-07    | CDS  |
| hsa-miR-7157-3p | NM_021209 | NLRC4 | 6.32E-05    | CDS  |
| hsa-miR-7158-5p | NM_021209 | NLRC4 | 0.004721326 | CDS  |
| hsa-miR-7158-3p | NM_021209 | NLRC4 | 0.00024586  | CDS  |
| hsa-miR-7158-3p | NM_021209 | NLRC4 | 0.02815115  | CDS  |
| hsa-miR-7161-3p | NM_021209 | NLRC4 | 0.1263682   | CDS  |
| hsa-miR-7161-3p | NM_021209 | NLRC4 | 0.00199289  | CDS  |
| hsa-miR-7160-5p | NM_021209 | NLRC4 | 0.001014772 | CDS  |
| hsa-miR-7160-5p | NM_021209 | NLRC4 | 0.01363586  | CDS  |
| hsa-miR-7160-5p | NM_021209 | NLRC4 | 0.000923374 | CDS  |
| hsa-miR-7160-3p | NM_021209 | NLRC4 | 8.81E-06    | CDS  |
| hsa-miR-7160-3p | NM_021209 | NLRC4 | 0.001262872 | CDS  |
| hsa-miR-7160-3p | NM_021209 | NLRC4 | 2.73E-06    | CDS  |
| hsa-miR-7162-5p | NM_021209 | NLRC4 | 2.98E-05    | CDS  |
| hsa-miR-7162-3p | NM_021209 | NLRC4 | 0.08763861  | CDS  |
| hsa-miR-7162-3p | NM_021209 | NLRC4 | 0.08743824  | CDS  |
| hsa-miR-7703    | NM_021209 | NLRC4 | 2.28E-05    | CDS  |
| hsa-miR-7703    | NM_021209 | NLRC4 | 0.02225154  | 5UTR |
| hsa-miR-7704    | NM_021209 | NLRC4 | 0.000441636 | CDS  |
| hsa-miR-7704    | NM_021209 | NLRC4 | 4.74E-05    | CDS  |
| hsa-miR-7705    | NM_021209 | NLRC4 | 4.24E-05    | CDS  |
| hsa-miR-7706    | NM_021209 | NLRC4 | 2.62E-05    | CDS  |
| hsa-miR-7706    | NM_021209 | NLRC4 | 0.000722117 | CDS  |
| hsa-miR-7843-5p | NM_021209 | NLRC4 | 8.69E-06    | CDS  |
| hsa-miR-7843-5p | NM_021209 | NLRC4 | 5.60E-05    | CDS  |
| hsa-miR-7843-5p | NM_021209 | NLRC4 | 6.44E-05    | CDS  |
| hsa-miR-7843-3p | NM_021209 | NLRC4 | 0.000169476 | CDS  |

|                  |           |       |             |      |
|------------------|-----------|-------|-------------|------|
| hsa-miR-7843-3p  | NM_021209 | NLRC4 | 2.48E-06    | CDS  |
| hsa-miR-4433b-5p | NM_021209 | NLRC4 | 0.009171114 | CDS  |
| hsa-miR-4433b-3p | NM_021209 | NLRC4 | 0.01473863  | CDS  |
| hsa-miR-4433b-3p | NM_021209 | NLRC4 | 0.001170791 | CDS  |
| hsa-miR-4433b-3p | NM_021209 | NLRC4 | 0.01459592  | CDS  |
| hsa-miR-1273h-5p | NM_021209 | NLRC4 | 0.02468582  | CDS  |
| hsa-miR-1273h-3p | NM_021209 | NLRC4 | 0.000889202 | CDS  |
| hsa-miR-6516-5p  | NM_021209 | NLRC4 | 0.000416659 | CDS  |
| hsa-miR-7845-5p  | NM_021209 | NLRC4 | 0.000642323 | CDS  |
| hsa-miR-7845-5p  | NM_021209 | NLRC4 | 0.004916043 | 5UTR |
| hsa-miR-7846-3p  | NM_021209 | NLRC4 | 0.000400492 | CDS  |
| hsa-miR-7847-3p  | NM_021209 | NLRC4 | 0.02308038  | CDS  |
| hsa-miR-7847-3p  | NM_021209 | NLRC4 | 0.000605168 | CDS  |
| hsa-miR-7847-3p  | NM_021209 | NLRC4 | 0.001445108 | CDS  |
| hsa-miR-7848-3p  | NM_021209 | NLRC4 | 4.84E-07    | CDS  |
| hsa-miR-7848-3p  | NM_021209 | NLRC4 | 1.88E-05    | CDS  |
| hsa-miR-7849-3p  | NM_021209 | NLRC4 | 0.001054134 | CDS  |
| hsa-miR-7849-3p  | NM_021209 | NLRC4 | 0.01407431  | CDS  |
| hsa-miR-7850-5p  | NM_021209 | NLRC4 | 0.01693603  | CDS  |
| hsa-miR-7851-3p  | NM_021209 | NLRC4 | 8.80E-06    | CDS  |
| hsa-miR-7851-3p  | NM_021209 | NLRC4 | 0.1121072   | CDS  |
| hsa-miR-7853-5p  | NM_021209 | NLRC4 | 6.41E-06    | CDS  |
| hsa-miR-7854-3p  | NM_021209 | NLRC4 | 0.000407782 | CDS  |
| hsa-miR-7854-3p  | NM_021209 | NLRC4 | 0.000664408 | CDS  |
| hsa-miR-7854-3p  | NM_021209 | NLRC4 | 0.000432941 | CDS  |
| hsa-miR-7856-5p  | NM_021209 | NLRC4 | 0.002224226 | CDS  |
| hsa-miR-548ba    | NM_021209 | NLRC4 | 0.02268423  | CDS  |
| hsa-miR-7973     | NM_021209 | NLRC4 | 0.000123515 | CDS  |
| hsa-miR-7974     | NM_021209 | NLRC4 | 0.02194376  | CDS  |
| hsa-miR-7974     | NM_021209 | NLRC4 | 0.00037471  | CDS  |
| hsa-miR-7974     | NM_021209 | NLRC4 | 4.41E-05    | CDS  |
| hsa-miR-7978     | NM_021209 | NLRC4 | 0.001057125 | CDS  |
| hsa-miR-7978     | NM_021209 | NLRC4 | 0.000260618 | CDS  |
| hsa-miR-7978     | NM_021209 | NLRC4 | 0.08846149  | CDS  |
| hsa-miR-8052     | NM_021209 | NLRC4 | 0.000189447 | CDS  |
| hsa-miR-8054     | NM_021209 | NLRC4 | 0.1888091   | CDS  |
| hsa-miR-8054     | NM_021209 | NLRC4 | 0.007995041 | CDS  |
| hsa-miR-8055     | NM_021209 | NLRC4 | 1.21E-05    | CDS  |
| hsa-miR-8055     | NM_021209 | NLRC4 | 0.08763861  | CDS  |
| hsa-miR-8055     | NM_021209 | NLRC4 | 0.002863565 | CDS  |
| hsa-miR-8056     | NM_021209 | NLRC4 | 2.74E-05    | CDS  |
| hsa-miR-8057     | NM_021209 | NLRC4 | 0.000671559 | CDS  |
| hsa-miR-8057     | NM_021209 | NLRC4 | 4.87E-05    | CDS  |
| hsa-miR-8058     | NM_021209 | NLRC4 | 0.000228869 | CDS  |

|              |           |       |             |      |
|--------------|-----------|-------|-------------|------|
| hsa-miR-8058 | NM_021209 | NLRC4 | 0.003596187 | CDS  |
| hsa-miR-8059 | NM_021209 | NLRC4 | 0.000671559 | CDS  |
| hsa-miR-8060 | NM_021209 | NLRC4 | 0.00095499  | CDS  |
| hsa-miR-8060 | NM_021209 | NLRC4 | 0.000146875 | CDS  |
| hsa-miR-8064 | NM_021209 | NLRC4 | 0.000167343 | CDS  |
| hsa-miR-8064 | NM_021209 | NLRC4 | 0.03650309  | 5UTR |
| hsa-miR-8065 | NM_021209 | NLRC4 | 0.002757795 | CDS  |
| hsa-miR-8069 | NM_021209 | NLRC4 | 0.000771038 | CDS  |
| hsa-miR-8069 | NM_021209 | NLRC4 | 0.0264118   | CDS  |
| hsa-miR-8069 | NM_021209 | NLRC4 | 8.25E-06    | CDS  |
| hsa-miR-8071 | NM_021209 | NLRC4 | 0.000724533 | CDS  |
| hsa-miR-8072 | NM_021209 | NLRC4 | 0.003824517 | CDS  |
| hsa-miR-8072 | NM_021209 | NLRC4 | 0.001687649 | 5UTR |
| hsa-miR-8074 | NM_021209 | NLRC4 | 1.91E-05    | CDS  |
| hsa-miR-8075 | NM_021209 | NLRC4 | 0.000988815 | CDS  |
| hsa-miR-8077 | NM_021209 | NLRC4 | 0.002226838 | CDS  |
| hsa-miR-8077 | NM_021209 | NLRC4 | 0.05045639  | CDS  |
| hsa-miR-8077 | NM_021209 | NLRC4 | 0.00092503  | CDS  |
| hsa-miR-8078 | NM_021209 | NLRC4 | 4.03E-05    | CDS  |
| hsa-miR-8078 | NM_021209 | NLRC4 | 1.60E-06    | CDS  |
| hsa-miR-8079 | NM_021209 | NLRC4 | 0.002221194 | CDS  |
| hsa-miR-8079 | NM_021209 | NLRC4 | 0.001836158 | CDS  |
| hsa-miR-8080 | NM_021209 | NLRC4 | 0.005514936 | CDS  |
| hsa-miR-8081 | NM_021209 | NLRC4 | 0.06961787  | CDS  |
| hsa-miR-8081 | NM_021209 | NLRC4 | 0.01195042  | CDS  |
| hsa-miR-8082 | NM_021209 | NLRC4 | 2.66E-05    | 5UTR |
| hsa-miR-8083 | NM_021209 | NLRC4 | 6.21E-05    | CDS  |
| hsa-miR-8085 | NM_021209 | NLRC4 | 0.004639071 | CDS  |
| hsa-miR-8085 | NM_021209 | NLRC4 | 0.01496644  | CDS  |
| hsa-miR-8087 | NM_021209 | NLRC4 | 0.004768539 | CDS  |
| hsa-miR-8088 | NM_021209 | NLRC4 | 0.01016125  | CDS  |
| hsa-miR-8089 | NM_021209 | NLRC4 | 8.53E-06    | CDS  |
| hsa-miR-8089 | NM_021209 | NLRC4 | 0.08241963  | CDS  |
| hsa-miR-8089 | NM_021209 | NLRC4 | 0.001372911 | CDS  |
| hsa-miR-8089 | NM_021209 | NLRC4 | 8.80E-06    | CDS  |
| hsa-miR-9500 | NM_021209 | NLRC4 | 0.01189954  | CDS  |
| hsa-miR-9718 | NM_021209 | NLRC4 | 0.000999579 | CDS  |
| hsa-miR-9718 | NM_021209 | NLRC4 | 0.01275645  | CDS  |
| hsa-miR-9899 | NM_021209 | NLRC4 | 0.001262872 | CDS  |
| hsa-miR-9900 | NM_021209 | NLRC4 | 0.000107954 | CDS  |
| hsa-miR-9901 | NM_021209 | NLRC4 | 0.005613622 | CDS  |
| hsa-miR-9901 | NM_021209 | NLRC4 | 7.08E-06    | CDS  |
| hsa-miR-9901 | NM_021209 | NLRC4 | 0.000404732 | 5UTR |
| hsa-miR-9901 | NM_021209 | NLRC4 | 0.000618871 | CDS  |



|                   |           |       |             |      |
|-------------------|-----------|-------|-------------|------|
| hsa-miR-9902      | NM_021209 | NLRC4 | 0.0011826   | CDS  |
| hsa-miR-9902      | NM_021209 | NLRC4 | 7.08E-06    | CDS  |
| hsa-miR-9903      | NM_021209 | NLRC4 | 1.88E-05    | CDS  |
| hsa-miR-9903      | NM_021209 | NLRC4 | 0.00042543  | CDS  |
| hsa-miR-9985      | NM_021209 | NLRC4 | 2.13E-05    | CDS  |
| hsa-miR-1843      | NM_021209 | NLRC4 | 4.35E-05    | CDS  |
| hsa-miR-1843      | NM_021209 | NLRC4 | 8.81E-06    | CDS  |
| hsa-miR-9986      | NM_021209 | NLRC4 | 6.17E-06    | CDS  |
| hsa-miR-9986      | NM_021209 | NLRC4 | 9.35E-05    | CDS  |
| hsa-miR-10226     | NM_021209 | NLRC4 | 0.05000951  | CDS  |
| hsa-miR-10392-5p  | NM_021209 | NLRC4 | 0.004769708 | CDS  |
| hsa-miR-10392-5p  | NM_021209 | NLRC4 | 0.003599718 | CDS  |
| hsa-miR-10392-3p  | NM_021209 | NLRC4 | 1.12E-05    | CDS  |
| hsa-miR-10393-3p  | NM_021209 | NLRC4 | 0.00043678  | CDS  |
| hsa-miR-10393-3p  | NM_021209 | NLRC4 | 0.002815688 | CDS  |
| hsa-miR-10394-5p  | NM_021209 | NLRC4 | 0.007691023 | CDS  |
| hsa-miR-10394-5p  | NM_021209 | NLRC4 | 4.48E-05    | CDS  |
| hsa-miR-10394-5p  | NM_021209 | NLRC4 | 1.19E-05    | CDS  |
| hsa-miR-10394-5p  | NM_021209 | NLRC4 | 0.000260618 | CDS  |
| hsa-miR-10394-3p  | NM_021209 | NLRC4 | 0.008415762 | CDS  |
| hsa-miR-10394-3p  | NM_021209 | NLRC4 | 0.000262096 | 5UTR |
| hsa-miR-10394-3p  | NM_021209 | NLRC4 | 0.000129336 | CDS  |
| hsa-miR-10395-5p  | NM_021209 | NLRC4 | 0.000345859 | CDS  |
| hsa-miR-10395-5p  | NM_021209 | NLRC4 | 0.004588791 | CDS  |
| hsa-miR-10396a-5p | NM_021209 | NLRC4 | 1.00E-06    | CDS  |
| hsa-miR-10396a-5p | NM_021209 | NLRC4 | 0.002444199 | CDS  |
| hsa-miR-10396a-3p | NM_021209 | NLRC4 | 1.82E-06    | CDS  |
| hsa-miR-10397-5p  | NM_021209 | NLRC4 | 8.38E-06    | CDS  |
| hsa-miR-10398-5p  | NM_021209 | NLRC4 | 9.16E-05    | CDS  |
| hsa-miR-10398-3p  | NM_021209 | NLRC4 | 7.95E-06    | CDS  |
| hsa-miR-10398-3p  | NM_021209 | NLRC4 | 1.10E-08    | CDS  |
| hsa-miR-10399-3p  | NM_021209 | NLRC4 | 0.000952318 | CDS  |
| hsa-miR-10399-3p  | NM_021209 | NLRC4 | 8.68E-05    | CDS  |
| hsa-miR-10399-3p  | NM_021209 | NLRC4 | 0.000897224 | CDS  |
| hsa-miR-10400-5p  | NM_021209 | NLRC4 | 0.001404358 | 5UTR |
| hsa-miR-10400-5p  | NM_021209 | NLRC4 | 0.003651178 | CDS  |
| hsa-miR-10400-5p  | NM_021209 | NLRC4 | 0.007721901 | CDS  |
| hsa-miR-10400-3p  | NM_021209 | NLRC4 | 1.46E-05    | CDS  |
| hsa-miR-10400-3p  | NM_021209 | NLRC4 | 4.98E-06    | CDS  |
| hsa-miR-10401-5p  | NM_021209 | NLRC4 | 0.007684299 | CDS  |
| hsa-miR-10401-5p  | NM_021209 | NLRC4 | 0.000649339 | CDS  |
| hsa-miR-10401-5p  | NM_021209 | NLRC4 | 6.97E-06    | CDS  |
| hsa-miR-10401-3p  | NM_021209 | NLRC4 | 0.000215389 | CDS  |
| hsa-miR-10401-3p  | NM_021209 | NLRC4 | 0.00013388  | CDS  |

|                   |           |       |             |      |
|-------------------|-----------|-------|-------------|------|
| hsa-miR-10396b-5p | NM_021209 | NLRC4 | 1.00E-06    | CDS  |
| hsa-miR-10396b-5p | NM_021209 | NLRC4 | 0.002444199 | CDS  |
| hsa-miR-10396b-3p | NM_021209 | NLRC4 | 1.82E-06    | CDS  |
| hsa-miR-10396b-3p | NM_021209 | NLRC4 | 1.53E-05    | CDS  |
| hsa-miR-10523-5p  | NM_021209 | NLRC4 | 0.000618    | CDS  |
| hsa-miR-10524-5p  | NM_021209 | NLRC4 | 1.46E-05    | CDS  |
| hsa-miR-10526-3p  | NM_021209 | NLRC4 | 0.000671559 | CDS  |
| hsa-miR-10527-5p  | NM_021209 | NLRC4 | 0.004768539 | CDS  |
| hsa-miR-11181-3p  | NM_021209 | NLRC4 | 0.05553747  | CDS  |
| hsa-miR-11181-3p  | NM_021209 | NLRC4 | 0.02185333  | CDS  |
| hsa-miR-11399     | NM_021209 | NLRC4 | 0.007047336 | CDS  |
| hsa-miR-11399     | NM_021209 | NLRC4 | 0.01095107  | CDS  |
| hsa-miR-11400     | NM_021209 | NLRC4 | 0.01626591  | CDS  |
| hsa-miR-11400     | NM_021209 | NLRC4 | 0.006918507 | CDS  |
| hsa-miR-3059-5p   | NM_021209 | NLRC4 | 4.27E-05    | CDS  |
| hsa-miR-3059-3p   | NM_021209 | NLRC4 | 0.001495183 | CDS  |
| hsa-miR-3085-5p   | NM_021209 | NLRC4 | 1.28E-06    | CDS  |
| hsa-miR-3085-5p   | NM_021209 | NLRC4 | 0.000608953 | CDS  |
| hsa-miR-3085-3p   | NM_021209 | NLRC4 | 0.007691023 | CDS  |
| hsa-miR-3085-3p   | NM_021209 | NLRC4 | 5.14E-05    | CDS  |
| hsa-miR-6529-5p   | NM_021209 | NLRC4 | 4.59E-05    | CDS  |
| hsa-miR-6529-5p   | NM_021209 | NLRC4 | 0.000136395 | 5UTR |
| hsa-miR-6529-5p   | NM_021209 | NLRC4 | 0.005514936 | CDS  |
| hsa-miR-6529-3p   | NM_021209 | NLRC4 | 3.92E-05    | CDS  |
| hsa-miR-6529-3p   | NM_021209 | NLRC4 | 0.01135416  | 5UTR |
| hsa-miR-9851-5p   | NM_021209 | NLRC4 | 0.000378314 | CDS  |
| hsa-miR-9851-5p   | NM_021209 | NLRC4 | 1.98E-07    | CDS  |
| hsa-miR-9851-5p   | NM_021209 | NLRC4 | 0.002488019 | CDS  |
| hsa-miR-9851-3p   | NM_021209 | NLRC4 | 6.98E-06    | CDS  |
| hsa-miR-9851-3p   | NM_021209 | NLRC4 | 2.27E-05    | CDS  |
| hsa-miR-9851-3p   | NM_021209 | NLRC4 | 1.39E-05    | CDS  |
| hsa-miR-12113     | NM_021209 | NLRC4 | 0.001666469 | CDS  |
| hsa-miR-12114     | NM_021209 | NLRC4 | 0.01804454  | CDS  |
| hsa-miR-12115     | NM_021209 | NLRC4 | 0.02308038  | CDS  |
| hsa-miR-12115     | NM_021209 | NLRC4 | 0.02447189  | CDS  |
| hsa-miR-12116     | NM_021209 | NLRC4 | 4.78E-06    | CDS  |
| hsa-miR-12117     | NM_021209 | NLRC4 | 0.000129336 | CDS  |
| hsa-miR-12118     | NM_021209 | NLRC4 | 0.000262096 | 5UTR |
| hsa-miR-12118     | NM_021209 | NLRC4 | 0.2851706   | CDS  |
| hsa-miR-12119     | NM_021209 | NLRC4 | 0.02352991  | CDS  |
| hsa-miR-12120     | NM_021209 | NLRC4 | 0.007482492 | CDS  |
| hsa-miR-12120     | NM_021209 | NLRC4 | 1.88E-05    | CDS  |
| hsa-miR-12121     | NM_021209 | NLRC4 | 1.85E-06    | CDS  |
| hsa-miR-12122     | NM_021209 | NLRC4 | 0.005103181 | CDS  |

|                  |              |       |             |      |
|------------------|--------------|-------|-------------|------|
| hsa-miR-12122    | NM_021209    | NLRC4 | 3.50E-05    | CDS  |
| hsa-miR-12124    | NM_021209    | NLRC4 | 0.003385126 | CDS  |
| hsa-miR-12124    | NM_021209    | NLRC4 | 0.000598122 | CDS  |
| hsa-miR-12124    | NM_021209    | NLRC4 | 0.002007726 | 5UTR |
| hsa-miR-12125    | NM_021209    | NLRC4 | 0.000106281 | CDS  |
| hsa-miR-12126    | NM_021209    | NLRC4 | 0.000136559 | CDS  |
| hsa-miR-12126    | NM_021209    | NLRC4 | 0.000348202 | CDS  |
| hsa-miR-12126    | NM_021209    | NLRC4 | 0.000262096 | 5UTR |
| hsa-miR-12127    | NM_021209    | NLRC4 | 0.000432941 | CDS  |
| hsa-miR-12127    | NM_021209    | NLRC4 | 0.01367002  | CDS  |
| hsa-miR-12127    | NM_021209    | NLRC4 | 0.005846554 | 5UTR |
| hsa-miR-12128    | NM_021209    | NLRC4 | 0.001394641 | CDS  |
| hsa-miR-12129    | NM_021209    | NLRC4 | 0.1025644   | CDS  |
| hsa-miR-12129    | NM_021209    | NLRC4 | 0.000517298 | CDS  |
| hsa-miR-12130    | NM_021209    | NLRC4 | 0.000361707 | CDS  |
| hsa-miR-12131    | NM_021209    | NLRC4 | 0.001218159 | CDS  |
| hsa-miR-12131    | NM_021209    | NLRC4 | 0.001018132 | 5UTR |
| hsa-let-7a-5p    | NM_001199138 | NLRC4 | 0.00237631  | CDS  |
| hsa-let-7b-5p    | NM_001199138 | NLRC4 | 0.00237631  | CDS  |
| hsa-let-7b-5p    | NM_001199138 | NLRC4 | 0.00750087  | CDS  |
| hsa-let-7b-5p    | NM_001199138 | NLRC4 | 0.000133333 | CDS  |
| hsa-let-7c-5p    | NM_001199138 | NLRC4 | 0.00237631  | CDS  |
| hsa-let-7c-3p    | NM_001199138 | NLRC4 | 9.41E-05    | CDS  |
| hsa-let-7d-5p    | NM_001199138 | NLRC4 | 0.00237631  | CDS  |
| hsa-let-7e-5p    | NM_001199138 | NLRC4 | 2.55E-05    | CDS  |
| hsa-let-7f-1-3p  | NM_001199138 | NLRC4 | 0.000104981 | 5UTR |
| hsa-miR-15a-5p   | NM_001199138 | NLRC4 | 0.000338269 | CDS  |
| hsa-miR-15a-3p   | NM_001199138 | NLRC4 | 7.08E-06    | CDS  |
| hsa-miR-16-5p    | NM_001199138 | NLRC4 | 9.20E-06    | CDS  |
| hsa-miR-17-3p    | NM_001199138 | NLRC4 | 0.001752888 | CDS  |
| hsa-miR-17-3p    | NM_001199138 | NLRC4 | 0.01064963  | CDS  |
| hsa-miR-18a-3p   | NM_001199138 | NLRC4 | 0.006075034 | CDS  |
| hsa-miR-18a-3p   | NM_001199138 | NLRC4 | 0.000583201 | CDS  |
| hsa-miR-19b-1-5p | NM_001199138 | NLRC4 | 0.002426029 | CDS  |
| hsa-miR-19b-2-5p | NM_001199138 | NLRC4 | 0.00033047  | CDS  |
| hsa-miR-21-5p    | NM_001199138 | NLRC4 | 0.05139873  | CDS  |
| hsa-miR-21-3p    | NM_001199138 | NLRC4 | 0.02183851  | CDS  |
| hsa-miR-22-5p    | NM_001199138 | NLRC4 | 0.008149687 | CDS  |
| hsa-miR-22-5p    | NM_001199138 | NLRC4 | 0.001206662 | CDS  |
| hsa-miR-22-3p    | NM_001199138 | NLRC4 | 0.000535464 | CDS  |
| hsa-miR-23a-5p   | NM_001199138 | NLRC4 | 4.59E-05    | CDS  |
| hsa-miR-23a-5p   | NM_001199138 | NLRC4 | 0.01095107  | CDS  |
| hsa-miR-23a-5p   | NM_001199138 | NLRC4 | 7.19E-05    | CDS  |
| hsa-miR-23a-5p   | NM_001199138 | NLRC4 | 0.000671559 | CDS  |

|                   |              |       |             |      |
|-------------------|--------------|-------|-------------|------|
| hsa-miR-23a-3p    | NM_001199138 | NLRC4 | 4.02E-07    | CDS  |
| hsa-miR-23a-3p    | NM_001199138 | NLRC4 | 0.005620409 | CDS  |
| hsa-miR-24-3p     | NM_001199138 | NLRC4 | 4.24E-05    | CDS  |
| hsa-miR-25-5p     | NM_001199138 | NLRC4 | 0.002521103 | CDS  |
| hsa-miR-25-3p     | NM_001199138 | NLRC4 | 0.000998661 | CDS  |
| hsa-miR-26a-5p    | NM_001199138 | NLRC4 | 0.02111429  | CDS  |
| hsa-miR-26a-1-3p  | NM_001199138 | NLRC4 | 0.000259323 | CDS  |
| hsa-miR-26a-1-3p  | NM_001199138 | NLRC4 | 0.004030374 | CDS  |
| hsa-miR-26b-3p    | NM_001199138 | NLRC4 | 0.000381964 | CDS  |
| hsa-miR-26b-3p    | NM_001199138 | NLRC4 | 0.00042543  | CDS  |
| hsa-miR-27a-5p    | NM_001199138 | NLRC4 | 0.000121209 | CDS  |
| hsa-miR-27a-5p    | NM_001199138 | NLRC4 | 9.02E-05    | CDS  |
| hsa-miR-27a-3p    | NM_001199138 | NLRC4 | 2.13E-05    | CDS  |
| hsa-miR-28-5p     | NM_001199138 | NLRC4 | 0.000268963 | CDS  |
| hsa-miR-28-3p     | NM_001199138 | NLRC4 | 0.03211739  | CDS  |
| hsa-miR-30a-3p    | NM_001199138 | NLRC4 | 2.96E-05    | CDS  |
| hsa-miR-31-3p     | NM_001199138 | NLRC4 | 2.83E-05    | CDS  |
| hsa-miR-31-3p     | NM_001199138 | NLRC4 | 0.000196593 | CDS  |
| hsa-miR-32-3p     | NM_001199138 | NLRC4 | 0.003941034 | CDS  |
| hsa-miR-33a-3p    | NM_001199138 | NLRC4 | 0.000787757 | CDS  |
| hsa-miR-92a-1-5p  | NM_001199138 | NLRC4 | 0.001447161 | CDS  |
| hsa-miR-92a-3p    | NM_001199138 | NLRC4 | 9.46E-05    | CDS  |
| hsa-miR-92a-2-5p  | NM_001199138 | NLRC4 | 3.15E-05    | CDS  |
| hsa-miR-92a-2-5p  | NM_001199138 | NLRC4 | 0.009044755 | CDS  |
| hsa-miR-92a-2-5p  | NM_001199138 | NLRC4 | 0.01408661  | CDS  |
| hsa-miR-93-3p     | NM_001199138 | NLRC4 | 0.000491166 | CDS  |
| hsa-miR-96-5p     | NM_001199138 | NLRC4 | 2.27E-05    | CDS  |
| hsa-miR-96-3p     | NM_001199138 | NLRC4 | 9.05E-06    | CDS  |
| hsa-miR-99a-3p    | NM_001199138 | NLRC4 | 0.0074165   | CDS  |
| hsa-miR-101-5p    | NM_001199138 | NLRC4 | 0.000170659 | CDS  |
| hsa-miR-29b-1-5p  | NM_001199138 | NLRC4 | 0.003088161 | CDS  |
| hsa-miR-29b-2-5p  | NM_001199138 | NLRC4 | 3.76E-05    | CDS  |
| hsa-miR-29b-2-5p  | NM_001199138 | NLRC4 | 0.000618871 | CDS  |
| hsa-miR-103a-2-5p | NM_001199138 | NLRC4 | 0.004422789 | CDS  |
| hsa-miR-103a-3p   | NM_001199138 | NLRC4 | 4.61E-07    | CDS  |
| hsa-miR-103a-1-5p | NM_001199138 | NLRC4 | 5.14E-05    | CDS  |
| hsa-miR-105-3p    | NM_001199138 | NLRC4 | 0.000855203 | CDS  |
| hsa-miR-105-3p    | NM_001199138 | NLRC4 | 0.00132712  | CDS  |
| hsa-miR-106a-3p   | NM_001199138 | NLRC4 | 0.000157089 | CDS  |
| hsa-miR-107       | NM_001199138 | NLRC4 | 1.33E-07    | CDS  |
| hsa-miR-197-5p    | NM_001199138 | NLRC4 | 1.84E-05    | 5UTR |
| hsa-miR-197-5p    | NM_001199138 | NLRC4 | 3.41E-07    | CDS  |
| hsa-miR-197-5p    | NM_001199138 | NLRC4 | 0.002810449 | CDS  |
| hsa-miR-197-5p    | NM_001199138 | NLRC4 | 0.000605168 | CDS  |

|                  |              |       |             |      |
|------------------|--------------|-------|-------------|------|
| hsa-miR-197-3p   | NM_001199138 | NLRC4 | 5.87E-05    | CDS  |
| hsa-miR-198      | NM_001199138 | NLRC4 | 0.02831089  | CDS  |
| hsa-miR-198      | NM_001199138 | NLRC4 | 0.000226722 | CDS  |
| hsa-miR-199a-5p  | NM_001199138 | NLRC4 | 3.03E-05    | CDS  |
| hsa-miR-199a-3p  | NM_001199138 | NLRC4 | 1.33E-07    | CDS  |
| hsa-miR-208a-5p  | NM_001199138 | NLRC4 | 2.55E-05    | CDS  |
| hsa-miR-208a-5p  | NM_001199138 | NLRC4 | 0.318128    | 5UTR |
| hsa-miR-129-5p   | NM_001199138 | NLRC4 | 0.01566064  | CDS  |
| hsa-miR-148a-5p  | NM_001199138 | NLRC4 | 0.000837869 | CDS  |
| hsa-miR-30c-2-3p | NM_001199138 | NLRC4 | 0.00210636  | CDS  |
| hsa-miR-30c-2-3p | NM_001199138 | NLRC4 | 0.000592353 | CDS  |
| hsa-miR-30c-2-3p | NM_001199138 | NLRC4 | 0.000135949 | CDS  |
| hsa-miR-139-5p   | NM_001199138 | NLRC4 | 0.00874274  | CDS  |
| hsa-miR-139-3p   | NM_001199138 | NLRC4 | 0.000123213 | CDS  |
| hsa-miR-10a-5p   | NM_001199138 | NLRC4 | 1.88E-05    | CDS  |
| hsa-miR-10b-5p   | NM_001199138 | NLRC4 | 0.001410534 | CDS  |
| hsa-miR-10b-3p   | NM_001199138 | NLRC4 | 0.000435946 | CDS  |
| hsa-miR-181a-5p  | NM_001199138 | NLRC4 | 7.76E-05    | CDS  |
| hsa-miR-181a-5p  | NM_001199138 | NLRC4 | 0.006729548 | CDS  |
| hsa-miR-181b-5p  | NM_001199138 | NLRC4 | 0.006729548 | CDS  |
| hsa-miR-181b-5p  | NM_001199138 | NLRC4 | 7.76E-05    | CDS  |
| hsa-miR-181b-5p  | NM_001199138 | NLRC4 | 0.01472671  | CDS  |
| hsa-miR-181c-5p  | NM_001199138 | NLRC4 | 0.006729548 | CDS  |
| hsa-miR-181c-5p  | NM_001199138 | NLRC4 | 7.76E-05    | CDS  |
| hsa-miR-187-5p   | NM_001199138 | NLRC4 | 7.51E-05    | CDS  |
| hsa-miR-187-3p   | NM_001199138 | NLRC4 | 0.000115647 | CDS  |
| hsa-miR-187-3p   | NM_001199138 | NLRC4 | 0.000757346 | CDS  |
| hsa-miR-199b-5p  | NM_001199138 | NLRC4 | 3.03E-05    | CDS  |
| hsa-miR-199b-3p  | NM_001199138 | NLRC4 | 1.33E-07    | CDS  |
| hsa-miR-203a-5p  | NM_001199138 | NLRC4 | 0.002346565 | CDS  |
| hsa-miR-204-5p   | NM_001199138 | NLRC4 | 0.000199878 | CDS  |
| hsa-miR-204-3p   | NM_001199138 | NLRC4 | 0.00101605  | 5UTR |
| hsa-miR-205-5p   | NM_001199138 | NLRC4 | 6.20E-07    | CDS  |
| hsa-miR-205-5p   | NM_001199138 | NLRC4 | 0.00027781  | CDS  |
| hsa-miR-205-3p   | NM_001199138 | NLRC4 | 0.04157089  | CDS  |
| hsa-miR-205-3p   | NM_001199138 | NLRC4 | 0.001498968 | CDS  |
| hsa-miR-210-5p   | NM_001199138 | NLRC4 | 6.58E-06    | CDS  |
| hsa-miR-210-5p   | NM_001199138 | NLRC4 | 2.13E-05    | CDS  |
| hsa-miR-210-3p   | NM_001199138 | NLRC4 | 1.85E-06    | CDS  |
| hsa-miR-210-3p   | NM_001199138 | NLRC4 | 7.71E-05    | CDS  |
| hsa-miR-211-5p   | NM_001199138 | NLRC4 | 0.000719145 | CDS  |
| hsa-miR-211-5p   | NM_001199138 | NLRC4 | 0.000199878 | CDS  |
| hsa-miR-211-5p   | NM_001199138 | NLRC4 | 0.01223285  | CDS  |
| hsa-miR-211-3p   | NM_001199138 | NLRC4 | 6.00E-06    | CDS  |

|                   |              |       |             |     |
|-------------------|--------------|-------|-------------|-----|
| hsa-miR-212-5p    | NM_001199138 | NLRC4 | 0.000443412 | CDS |
| hsa-miR-212-3p    | NM_001199138 | NLRC4 | 5.23E-05    | CDS |
| hsa-miR-212-3p    | NM_001199138 | NLRC4 | 0.00110755  | CDS |
| hsa-miR-212-3p    | NM_001199138 | NLRC4 | 0.002426029 | CDS |
| hsa-miR-214-5p    | NM_001199138 | NLRC4 | 0.000164624 | CDS |
| hsa-miR-214-3p    | NM_001199138 | NLRC4 | 6.94E-05    | CDS |
| hsa-miR-214-3p    | NM_001199138 | NLRC4 | 6.67E-05    | CDS |
| hsa-miR-214-3p    | NM_001199138 | NLRC4 | 0.002536929 | CDS |
| hsa-miR-215-3p    | NM_001199138 | NLRC4 | 0.01223285  | CDS |
| hsa-miR-215-3p    | NM_001199138 | NLRC4 | 0.000552817 | CDS |
| hsa-miR-216a-5p   | NM_001199138 | NLRC4 | 0.001022618 | CDS |
| hsa-miR-216a-3p   | NM_001199138 | NLRC4 | 3.42E-07    | CDS |
| hsa-miR-216a-3p   | NM_001199138 | NLRC4 | 0.02825249  | CDS |
| hsa-miR-217-5p    | NM_001199138 | NLRC4 | 9.39E-05    | CDS |
| hsa-miR-218-1-3p  | NM_001199138 | NLRC4 | 0.005266164 | CDS |
| hsa-miR-218-2-3p  | NM_001199138 | NLRC4 | 0.000842272 | CDS |
| hsa-miR-218-2-3p  | NM_001199138 | NLRC4 | 6.24E-05    | CDS |
| hsa-miR-219a-1-3p | NM_001199138 | NLRC4 | 0.000926972 | CDS |
| hsa-miR-219a-1-3p | NM_001199138 | NLRC4 | 0.002226838 | CDS |
| hsa-miR-221-3p    | NM_001199138 | NLRC4 | 7.69E-06    | CDS |
| hsa-miR-221-3p    | NM_001199138 | NLRC4 | 0.001225395 | CDS |
| hsa-miR-221-3p    | NM_001199138 | NLRC4 | 0.000137416 | CDS |
| hsa-miR-221-3p    | NM_001199138 | NLRC4 | 0.000281735 | CDS |
| hsa-miR-222-5p    | NM_001199138 | NLRC4 | 4.44E-07    | CDS |
| hsa-miR-222-5p    | NM_001199138 | NLRC4 | 0.000945067 | CDS |
| hsa-miR-222-3p    | NM_001199138 | NLRC4 | 0.003752472 | CDS |
| hsa-miR-223-3p    | NM_001199138 | NLRC4 | 0.02274983  | CDS |
| hsa-miR-224-5p    | NM_001199138 | NLRC4 | 0.006498872 | CDS |
| hsa-miR-200b-5p   | NM_001199138 | NLRC4 | 2.82E-07    | CDS |
| hsa-miR-200b-5p   | NM_001199138 | NLRC4 | 0.1399983   | CDS |
| hsa-miR-200b-3p   | NM_001199138 | NLRC4 | 0.03757485  | CDS |
| hsa-let-7g-3p     | NM_001199138 | NLRC4 | 6.75E-07    | CDS |
| hsa-let-7g-3p     | NM_001199138 | NLRC4 | 2.96E-05    | CDS |
| hsa-let-7i-5p     | NM_001199138 | NLRC4 | 0.00750087  | CDS |
| hsa-let-7i-3p     | NM_001199138 | NLRC4 | 8.94E-05    | CDS |
| hsa-let-7i-3p     | NM_001199138 | NLRC4 | 0.000324004 | CDS |
| hsa-miR-15b-5p    | NM_001199138 | NLRC4 | 7.72E-06    | CDS |
| hsa-miR-23b-5p    | NM_001199138 | NLRC4 | 0.008415762 | CDS |
| hsa-miR-23b-5p    | NM_001199138 | NLRC4 | 0.000859196 | CDS |
| hsa-miR-23b-5p    | NM_001199138 | NLRC4 | 5.54E-06    | CDS |
| hsa-miR-23b-3p    | NM_001199138 | NLRC4 | 4.02E-07    | CDS |
| hsa-miR-23b-3p    | NM_001199138 | NLRC4 | 0.005620409 | CDS |
| hsa-miR-27b-5p    | NM_001199138 | NLRC4 | 0.000248086 | CDS |
| hsa-miR-27b-3p    | NM_001199138 | NLRC4 | 2.13E-05    | CDS |

|                   |              |       |             |      |
|-------------------|--------------|-------|-------------|------|
| hsa-miR-30b-5p    | NM_001199138 | NLRC4 | 0.009171114 | CDS  |
| hsa-miR-30b-3p    | NM_001199138 | NLRC4 | 0.000441884 | CDS  |
| hsa-miR-30b-3p    | NM_001199138 | NLRC4 | 0.08241963  | CDS  |
| hsa-miR-30b-3p    | NM_001199138 | NLRC4 | 0.001481713 | CDS  |
| hsa-miR-122-5p    | NM_001199138 | NLRC4 | 4.95E-07    | CDS  |
| hsa-miR-124-5p    | NM_001199138 | NLRC4 | 0.001114676 | CDS  |
| hsa-miR-124-5p    | NM_001199138 | NLRC4 | 0.000787757 | CDS  |
| hsa-miR-124-3p    | NM_001199138 | NLRC4 | 0.001897022 | CDS  |
| hsa-miR-124-3p    | NM_001199138 | NLRC4 | 4.18E-05    | CDS  |
| hsa-miR-125b-1-3p | NM_001199138 | NLRC4 | 3.99E-05    | CDS  |
| hsa-miR-125b-1-3p | NM_001199138 | NLRC4 | 9.25E-07    | CDS  |
| hsa-miR-125b-1-3p | NM_001199138 | NLRC4 | 6.44E-05    | CDS  |
| hsa-miR-128-1-5p  | NM_001199138 | NLRC4 | 0.001727314 | CDS  |
| hsa-miR-128-1-5p  | NM_001199138 | NLRC4 | 1.86E-05    | CDS  |
| hsa-miR-128-1-5p  | NM_001199138 | NLRC4 | 6.65E-06    | CDS  |
| hsa-miR-128-3p    | NM_001199138 | NLRC4 | 3.42E-07    | CDS  |
| hsa-miR-128-3p    | NM_001199138 | NLRC4 | 9.39E-05    | CDS  |
| hsa-miR-130a-5p   | NM_001199138 | NLRC4 | 0.0379225   | CDS  |
| hsa-miR-135a-5p   | NM_001199138 | NLRC4 | 0.000772438 | CDS  |
| hsa-miR-135a-3p   | NM_001199138 | NLRC4 | 5.90E-05    | CDS  |
| hsa-miR-135a-3p   | NM_001199138 | NLRC4 | 0.005224415 | CDS  |
| hsa-miR-135a-2-3p | NM_001199138 | NLRC4 | 0.00232753  | CDS  |
| hsa-miR-137-5p    | NM_001199138 | NLRC4 | 0.001170791 | CDS  |
| hsa-miR-137-5p    | NM_001199138 | NLRC4 | 0.1188673   | CDS  |
| hsa-miR-138-5p    | NM_001199138 | NLRC4 | 3.23E-06    | CDS  |
| hsa-miR-138-5p    | NM_001199138 | NLRC4 | 7.76E-05    | CDS  |
| hsa-miR-138-5p    | NM_001199138 | NLRC4 | 0.004879862 | CDS  |
| hsa-miR-140-5p    | NM_001199138 | NLRC4 | 0.001114676 | CDS  |
| hsa-miR-140-5p    | NM_001199138 | NLRC4 | 5.59E-05    | CDS  |
| hsa-miR-140-3p    | NM_001199138 | NLRC4 | 3.70E-07    | CDS  |
| hsa-miR-142-3p    | NM_001199138 | NLRC4 | 0.009171114 | CDS  |
| hsa-miR-142-3p    | NM_001199138 | NLRC4 | 0.000596955 | 5UTR |
| hsa-miR-143-5p    | NM_001199138 | NLRC4 | 0.000216501 | CDS  |
| hsa-miR-143-5p    | NM_001199138 | NLRC4 | 4.42E-05    | CDS  |
| hsa-miR-143-5p    | NM_001199138 | NLRC4 | 0.002444199 | CDS  |
| hsa-miR-143-3p    | NM_001199138 | NLRC4 | 0.00170134  | CDS  |
| hsa-miR-143-3p    | NM_001199138 | NLRC4 | 0.000169476 | CDS  |
| hsa-miR-143-3p    | NM_001199138 | NLRC4 | 0.004509441 | CDS  |
| hsa-miR-145-5p    | NM_001199138 | NLRC4 | 4.03E-05    | CDS  |
| hsa-miR-145-5p    | NM_001199138 | NLRC4 | 2.42E-06    | CDS  |
| hsa-miR-145-3p    | NM_001199138 | NLRC4 | 0.04013073  | CDS  |
| hsa-miR-152-5p    | NM_001199138 | NLRC4 | 0.000837869 | CDS  |
| hsa-miR-152-5p    | NM_001199138 | NLRC4 | 0.006198772 | CDS  |
| hsa-miR-153-3p    | NM_001199138 | NLRC4 | 6.16E-05    | CDS  |

|                   |              |       |             |     |
|-------------------|--------------|-------|-------------|-----|
| hsa-miR-191-3p    | NM_001199138 | NLRC4 | 7.49E-05    | CDS |
| hsa-miR-191-3p    | NM_001199138 | NLRC4 | 0.1076955   | CDS |
| hsa-miR-191-3p    | NM_001199138 | NLRC4 | 0.0101559   | CDS |
| hsa-miR-9-5p      | NM_001199138 | NLRC4 | 0.008738688 | CDS |
| hsa-miR-9-5p      | NM_001199138 | NLRC4 | 0.000535268 | CDS |
| hsa-miR-9-5p      | NM_001199138 | NLRC4 | 0.001384617 | CDS |
| hsa-miR-125a-5p   | NM_001199138 | NLRC4 | 0.05124352  | CDS |
| hsa-miR-125a-3p   | NM_001199138 | NLRC4 | 9.25E-07    | CDS |
| hsa-miR-125a-3p   | NM_001199138 | NLRC4 | 3.16E-06    | CDS |
| hsa-miR-125b-2-3p | NM_001199138 | NLRC4 | 0.005072645 | CDS |
| hsa-miR-126-3p    | NM_001199138 | NLRC4 | 0.002564212 | CDS |
| hsa-miR-127-5p    | NM_001199138 | NLRC4 | 1.12E-05    | CDS |
| hsa-miR-127-5p    | NM_001199138 | NLRC4 | 0.001481713 | CDS |
| hsa-miR-127-5p    | NM_001199138 | NLRC4 | 0.007362526 | CDS |
| hsa-miR-127-3p    | NM_001199138 | NLRC4 | 8.56E-06    | CDS |
| hsa-miR-127-3p    | NM_001199138 | NLRC4 | 0.000905808 | CDS |
| hsa-miR-127-3p    | NM_001199138 | NLRC4 | 0.001002627 | CDS |
| hsa-miR-129-2-3p  | NM_001199138 | NLRC4 | 2.98E-05    | CDS |
| hsa-miR-134-5p    | NM_001199138 | NLRC4 | 0.000103244 | CDS |
| hsa-miR-134-5p    | NM_001199138 | NLRC4 | 0.06985438  | CDS |
| hsa-miR-134-3p    | NM_001199138 | NLRC4 | 0.000115647 | CDS |
| hsa-miR-134-3p    | NM_001199138 | NLRC4 | 1.04E-05    | CDS |
| hsa-miR-134-3p    | NM_001199138 | NLRC4 | 2.96E-05    | CDS |
| hsa-miR-136-3p    | NM_001199138 | NLRC4 | 0.02271549  | CDS |
| hsa-miR-138-1-3p  | NM_001199138 | NLRC4 | 8.97E-06    | CDS |
| hsa-miR-149-5p    | NM_001199138 | NLRC4 | 0.001304349 | CDS |
| hsa-miR-149-3p    | NM_001199138 | NLRC4 | 0.0264118   | CDS |
| hsa-miR-149-3p    | NM_001199138 | NLRC4 | 0.03273842  | CDS |
| hsa-miR-150-3p    | NM_001199138 | NLRC4 | 0.000216501 | CDS |
| hsa-miR-150-3p    | NM_001199138 | NLRC4 | 0.002208114 | CDS |
| hsa-miR-154-5p    | NM_001199138 | NLRC4 | 0.01861651  | CDS |
| hsa-miR-184       | NM_001199138 | NLRC4 | 0.002521103 | CDS |
| hsa-miR-185-5p    | NM_001199138 | NLRC4 | 0.007362526 | CDS |
| hsa-miR-185-3p    | NM_001199138 | NLRC4 | 0.000189447 | CDS |
| hsa-miR-186-5p    | NM_001199138 | NLRC4 | 0.001054134 | CDS |
| hsa-miR-188-5p    | NM_001199138 | NLRC4 | 0.002217478 | CDS |
| hsa-miR-188-5p    | NM_001199138 | NLRC4 | 0.000239915 | CDS |
| hsa-miR-188-3p    | NM_001199138 | NLRC4 | 2.98E-05    | CDS |
| hsa-miR-188-3p    | NM_001199138 | NLRC4 | 0.006055493 | CDS |
| hsa-miR-193a-5p   | NM_001199138 | NLRC4 | 0.000297589 | CDS |
| hsa-miR-193a-5p   | NM_001199138 | NLRC4 | 0.00016652  | CDS |
| hsa-miR-193a-3p   | NM_001199138 | NLRC4 | 9.61E-05    | CDS |
| hsa-miR-194-5p    | NM_001199138 | NLRC4 | 0.000972019 | CDS |
| hsa-miR-194-5p    | NM_001199138 | NLRC4 | 0.000542025 | CDS |



|                   |              |       |             |      |
|-------------------|--------------|-------|-------------|------|
| hsa-miR-195-3p    | NM_001199138 | NLRC4 | 0.002536929 | CDS  |
| hsa-miR-195-3p    | NM_001199138 | NLRC4 | 0.001503355 | CDS  |
| hsa-miR-195-3p    | NM_001199138 | NLRC4 | 0.05157565  | 5UTR |
| hsa-miR-320a-5p   | NM_001199138 | NLRC4 | 0.000447996 | CDS  |
| hsa-miR-320a-5p   | NM_001199138 | NLRC4 | 6.96E-05    | CDS  |
| hsa-miR-320a-5p   | NM_001199138 | NLRC4 | 0.001022618 | CDS  |
| hsa-miR-320a-3p   | NM_001199138 | NLRC4 | 0.001567866 | CDS  |
| hsa-miR-200c-5p   | NM_001199138 | NLRC4 | 1.12E-05    | CDS  |
| hsa-miR-200c-5p   | NM_001199138 | NLRC4 | 0.06641009  | CDS  |
| hsa-miR-1-5p      | NM_001199138 | NLRC4 | 0.01318848  | CDS  |
| hsa-miR-128-2-5p  | NM_001199138 | NLRC4 | 0.003651178 | CDS  |
| hsa-miR-194-3p    | NM_001199138 | NLRC4 | 0.01534616  | 5UTR |
| hsa-miR-106b-3p   | NM_001199138 | NLRC4 | 6.05E-07    | CDS  |
| hsa-miR-106b-3p   | NM_001199138 | NLRC4 | 1.12E-05    | CDS  |
| hsa-miR-106b-3p   | NM_001199138 | NLRC4 | 0.002488019 | CDS  |
| hsa-miR-29c-5p    | NM_001199138 | NLRC4 | 4.78E-06    | CDS  |
| hsa-miR-29c-5p    | NM_001199138 | NLRC4 | 0.002434622 | CDS  |
| hsa-miR-302a-5p   | NM_001199138 | NLRC4 | 0.2170907   | CDS  |
| hsa-miR-302a-3p   | NM_001199138 | NLRC4 | 2.88E-05    | CDS  |
| hsa-miR-302a-3p   | NM_001199138 | NLRC4 | 0.002346565 | CDS  |
| hsa-miR-302a-3p   | NM_001199138 | NLRC4 | 0.000963264 | CDS  |
| hsa-miR-219a-2-3p | NM_001199138 | NLRC4 | 0.00069606  | CDS  |
| hsa-miR-34c-5p    | NM_001199138 | NLRC4 | 0.004462303 | CDS  |
| hsa-miR-299-3p    | NM_001199138 | NLRC4 | 0.001897022 | CDS  |
| hsa-miR-99b-3p    | NM_001199138 | NLRC4 | 0.0532159   | CDS  |
| hsa-miR-99b-3p    | NM_001199138 | NLRC4 | 0.000230589 | CDS  |
| hsa-miR-296-5p    | NM_001199138 | NLRC4 | 0.000211166 | CDS  |
| hsa-miR-296-3p    | NM_001199138 | NLRC4 | 0.09012369  | CDS  |
| hsa-miR-296-3p    | NM_001199138 | NLRC4 | 0.000598122 | CDS  |
| hsa-miR-130b-5p   | NM_001199138 | NLRC4 | 1.82E-06    | CDS  |
| hsa-miR-130b-5p   | NM_001199138 | NLRC4 | 0.0160053   | CDS  |
| hsa-miR-130b-3p   | NM_001199138 | NLRC4 | 0.000435946 | CDS  |
| hsa-miR-361-5p    | NM_001199138 | NLRC4 | 0.000423087 | CDS  |
| hsa-miR-361-3p    | NM_001199138 | NLRC4 | 0.001157739 | CDS  |
| hsa-miR-361-3p    | NM_001199138 | NLRC4 | 1.46E-05    | CDS  |
| hsa-miR-363-5p    | NM_001199138 | NLRC4 | 0.003344924 | CDS  |
| hsa-miR-365a-5p   | NM_001199138 | NLRC4 | 0.000207579 | CDS  |
| hsa-miR-365a-5p   | NM_001199138 | NLRC4 | 0.00303577  | CDS  |
| hsa-miR-365b-5p   | NM_001199138 | NLRC4 | 0.001447161 | CDS  |
| hsa-miR-365b-5p   | NM_001199138 | NLRC4 | 0.0264118   | CDS  |
| hsa-miR-365b-5p   | NM_001199138 | NLRC4 | 0.00303577  | CDS  |
| hsa-miR-302c-3p   | NM_001199138 | NLRC4 | 0.3143165   | 5UTR |
| hsa-miR-302d-5p   | NM_001199138 | NLRC4 | 0.01940061  | CDS  |
| hsa-miR-376c-5p   | NM_001199138 | NLRC4 | 0.01718499  | CDS  |

|                 |              |       |             |      |
|-----------------|--------------|-------|-------------|------|
| hsa-miR-369-5p  | NM_001199138 | NLRC4 | 0.06684233  | CDS  |
| hsa-miR-370-5p  | NM_001199138 | NLRC4 | 6.66E-06    | CDS  |
| hsa-miR-370-5p  | NM_001199138 | NLRC4 | 6.24E-05    | CDS  |
| hsa-miR-370-3p  | NM_001199138 | NLRC4 | 0.000649339 | CDS  |
| hsa-miR-371a-5p | NM_001199138 | NLRC4 | 0.000385323 | CDS  |
| hsa-miR-371a-5p | NM_001199138 | NLRC4 | 0.000104356 | CDS  |
| hsa-miR-371a-5p | NM_001199138 | NLRC4 | 0.02111429  | CDS  |
| hsa-miR-371a-3p | NM_001199138 | NLRC4 | 2.88E-05    | CDS  |
| hsa-miR-372-5p  | NM_001199138 | NLRC4 | 0.000265951 | CDS  |
| hsa-miR-373-5p  | NM_001199138 | NLRC4 | 0.02111429  | CDS  |
| hsa-miR-373-3p  | NM_001199138 | NLRC4 | 0.005454844 | CDS  |
| hsa-miR-375-5p  | NM_001199138 | NLRC4 | 1.36E-05    | CDS  |
| hsa-miR-376a-5p | NM_001199138 | NLRC4 | 0.00043678  | CDS  |
| hsa-miR-376a-3p | NM_001199138 | NLRC4 | 0.02815383  | CDS  |
| hsa-miR-377-5p  | NM_001199138 | NLRC4 | 0.000664408 | CDS  |
| hsa-miR-377-5p  | NM_001199138 | NLRC4 | 1.13E-05    | CDS  |
| hsa-miR-377-5p  | NM_001199138 | NLRC4 | 0.000447908 | CDS  |
| hsa-miR-378a-5p | NM_001199138 | NLRC4 | 0.000542111 | CDS  |
| hsa-miR-378a-3p | NM_001199138 | NLRC4 | 0.02675239  | CDS  |
| hsa-miR-380-5p  | NM_001199138 | NLRC4 | 0.00116715  | CDS  |
| hsa-miR-380-5p  | NM_001199138 | NLRC4 | 0.000276588 | 5UTR |
| hsa-miR-381-5p  | NM_001199138 | NLRC4 | 4.02E-06    | CDS  |
| hsa-miR-381-5p  | NM_001199138 | NLRC4 | 0.00043678  | CDS  |
| hsa-miR-381-5p  | NM_001199138 | NLRC4 | 0.000293001 | CDS  |
| hsa-miR-381-3p  | NM_001199138 | NLRC4 | 0.000507522 | CDS  |
| hsa-miR-381-3p  | NM_001199138 | NLRC4 | 0.01388229  | CDS  |
| hsa-miR-382-5p  | NM_001199138 | NLRC4 | 0.000963264 | CDS  |
| hsa-miR-383-3p  | NM_001199138 | NLRC4 | 7.08E-06    | CDS  |
| hsa-miR-330-5p  | NM_001199138 | NLRC4 | 0.004474328 | CDS  |
| hsa-miR-330-5p  | NM_001199138 | NLRC4 | 0.000106281 | CDS  |
| hsa-miR-330-5p  | NM_001199138 | NLRC4 | 7.16E-06    | CDS  |
| hsa-miR-330-3p  | NM_001199138 | NLRC4 | 0.000464893 | CDS  |
| hsa-miR-328-3p  | NM_001199138 | NLRC4 | 1.35E-05    | CDS  |
| hsa-miR-328-3p  | NM_001199138 | NLRC4 | 8.38E-06    | CDS  |
| hsa-miR-328-3p  | NM_001199138 | NLRC4 | 6.20E-05    | CDS  |
| hsa-miR-342-5p  | NM_001199138 | NLRC4 | 4.18E-05    | CDS  |
| hsa-miR-342-5p  | NM_001199138 | NLRC4 | 0.000101259 | CDS  |
| hsa-miR-342-5p  | NM_001199138 | NLRC4 | 0.001516459 | CDS  |
| hsa-miR-342-3p  | NM_001199138 | NLRC4 | 0.000186    | CDS  |
| hsa-miR-323a-5p | NM_001199138 | NLRC4 | 0.00013022  | CDS  |
| hsa-miR-323a-5p | NM_001199138 | NLRC4 | 0.000384649 | CDS  |
| hsa-miR-323a-5p | NM_001199138 | NLRC4 | 4.99E-06    | CDS  |
| hsa-miR-326     | NM_001199138 | NLRC4 | 0.00120872  | CDS  |
| hsa-miR-326     | NM_001199138 | NLRC4 | 7.16E-06    | CDS  |

|                 |              |       |             |      |
|-----------------|--------------|-------|-------------|------|
| hsa-miR-326     | NM_001199138 | NLRC4 | 0.000595816 | CDS  |
| hsa-miR-151a-5p | NM_001199138 | NLRC4 | 0.001239845 | CDS  |
| hsa-miR-151a-5p | NM_001199138 | NLRC4 | 0.000384216 | CDS  |
| hsa-miR-151a-3p | NM_001199138 | NLRC4 | 0.001481713 | CDS  |
| hsa-miR-151a-3p | NM_001199138 | NLRC4 | 0.000238785 | CDS  |
| hsa-miR-135b-5p | NM_001199138 | NLRC4 | 9.72E-05    | CDS  |
| hsa-miR-135b-5p | NM_001199138 | NLRC4 | 0.000772438 | CDS  |
| hsa-miR-135b-3p | NM_001199138 | NLRC4 | 3.53E-05    | CDS  |
| hsa-miR-331-5p  | NM_001199138 | NLRC4 | 6.99E-05    | CDS  |
| hsa-miR-331-5p  | NM_001199138 | NLRC4 | 0.00128942  | CDS  |
| hsa-miR-331-3p  | NM_001199138 | NLRC4 | 7.16E-06    | CDS  |
| hsa-miR-324-5p  | NM_001199138 | NLRC4 | 2.82E-07    | CDS  |
| hsa-miR-324-5p  | NM_001199138 | NLRC4 | 2.59E-05    | CDS  |
| hsa-miR-324-5p  | NM_001199138 | NLRC4 | 7.69E-06    | CDS  |
| hsa-miR-324-3p  | NM_001199138 | NLRC4 | 3.50E-05    | CDS  |
| hsa-miR-324-3p  | NM_001199138 | NLRC4 | 2.82E-07    | CDS  |
| hsa-miR-338-3p  | NM_001199138 | NLRC4 | 0.000174573 | CDS  |
| hsa-miR-339-5p  | NM_001199138 | NLRC4 | 0.000381964 | CDS  |
| hsa-miR-339-3p  | NM_001199138 | NLRC4 | 0.01441158  | 5UTR |
| hsa-miR-339-3p  | NM_001199138 | NLRC4 | 0.02165254  | CDS  |
| hsa-miR-335-3p  | NM_001199138 | NLRC4 | 0.004577843 | CDS  |
| hsa-miR-133b    | NM_001199138 | NLRC4 | 0.000946251 | CDS  |
| hsa-miR-325     | NM_001199138 | NLRC4 | 0.000120896 | CDS  |
| hsa-miR-345-5p  | NM_001199138 | NLRC4 | 1.22E-05    | CDS  |
| hsa-miR-345-5p  | NM_001199138 | NLRC4 | 0.003088161 | CDS  |
| hsa-miR-345-3p  | NM_001199138 | NLRC4 | 2.04E-05    | CDS  |
| hsa-miR-345-3p  | NM_001199138 | NLRC4 | 0.002217478 | CDS  |
| hsa-miR-346     | NM_001199138 | NLRC4 | 8.86E-07    | CDS  |
| hsa-miR-346     | NM_001199138 | NLRC4 | 0.000196593 | CDS  |
| hsa-miR-346     | NM_001199138 | NLRC4 | 0.003923357 | CDS  |
| hsa-miR-196b-5p | NM_001199138 | NLRC4 | 0.00498711  | CDS  |
| hsa-miR-196b-3p | NM_001199138 | NLRC4 | 0.003455527 | CDS  |
| hsa-miR-422a    | NM_001199138 | NLRC4 | 0.01176218  | CDS  |
| hsa-miR-423-5p  | NM_001199138 | NLRC4 | 0.001564227 | CDS  |
| hsa-miR-423-3p  | NM_001199138 | NLRC4 | 1.91E-05    | CDS  |
| hsa-miR-423-3p  | NM_001199138 | NLRC4 | 1.10E-08    | CDS  |
| hsa-miR-424-5p  | NM_001199138 | NLRC4 | 9.20E-06    | CDS  |
| hsa-miR-424-5p  | NM_001199138 | NLRC4 | 7.45E-06    | CDS  |
| hsa-miR-424-3p  | NM_001199138 | NLRC4 | 0.000107277 | CDS  |
| hsa-miR-424-3p  | NM_001199138 | NLRC4 | 0.000241027 | CDS  |
| hsa-miR-425-5p  | NM_001199138 | NLRC4 | 0.003446949 | CDS  |
| hsa-miR-425-3p  | NM_001199138 | NLRC4 | 0.001262872 | CDS  |
| hsa-miR-425-3p  | NM_001199138 | NLRC4 | 0.00128942  | CDS  |
| hsa-miR-18b-5p  | NM_001199138 | NLRC4 | 6.66E-06    | CDS  |

|                   |              |       |             |      |
|-------------------|--------------|-------|-------------|------|
| hsa-miR-18b-3p    | NM_001199138 | NLRC4 | 0.000583201 | CDS  |
| hsa-miR-18b-3p    | NM_001199138 | NLRC4 | 1.93E-05    | 5UTR |
| hsa-miR-18b-3p    | NM_001199138 | NLRC4 | 0.000166253 | CDS  |
| hsa-miR-20b-3p    | NM_001199138 | NLRC4 | 9.02E-06    | CDS  |
| hsa-miR-20b-3p    | NM_001199138 | NLRC4 | 6.02E-08    | CDS  |
| hsa-miR-448       | NM_001199138 | NLRC4 | 9.46E-05    | CDS  |
| hsa-miR-450a-1-3p | NM_001199138 | NLRC4 | 0.000228869 | CDS  |
| hsa-miR-431-5p    | NM_001199138 | NLRC4 | 0.000757346 | CDS  |
| hsa-miR-431-3p    | NM_001199138 | NLRC4 | 6.99E-05    | CDS  |
| hsa-miR-431-3p    | NM_001199138 | NLRC4 | 0.002444199 | CDS  |
| hsa-miR-433-5p    | NM_001199138 | NLRC4 | 0.001125861 | CDS  |
| hsa-miR-433-3p    | NM_001199138 | NLRC4 | 0.000146875 | CDS  |
| hsa-miR-329-5p    | NM_001199138 | NLRC4 | 0.001309985 | CDS  |
| hsa-miR-329-5p    | NM_001199138 | NLRC4 | 0.01322285  | CDS  |
| hsa-miR-329-5p    | NM_001199138 | NLRC4 | 0.000174632 | CDS  |
| hsa-miR-329-5p    | NM_001199138 | NLRC4 | 0.001409008 | CDS  |
| hsa-miR-329-3p    | NM_001199138 | NLRC4 | 0.000652497 | CDS  |
| hsa-miR-451a      | NM_001199138 | NLRC4 | 0.001137387 | CDS  |
| hsa-miR-452-5p    | NM_001199138 | NLRC4 | 0.000882282 | CDS  |
| hsa-miR-409-5p    | NM_001199138 | NLRC4 | 8.39E-05    | CDS  |
| hsa-miR-409-5p    | NM_001199138 | NLRC4 | 7.36E-05    | CDS  |
| hsa-miR-412-5p    | NM_001199138 | NLRC4 | 3.99E-05    | CDS  |
| hsa-miR-412-3p    | NM_001199138 | NLRC4 | 0.001408827 | CDS  |
| hsa-miR-412-3p    | NM_001199138 | NLRC4 | 1.46E-05    | CDS  |
| hsa-miR-412-3p    | NM_001199138 | NLRC4 | 0.00561403  | CDS  |
| hsa-miR-410-5p    | NM_001199138 | NLRC4 | 0.02268423  | CDS  |
| hsa-miR-410-3p    | NM_001199138 | NLRC4 | 2.79E-05    | CDS  |
| hsa-miR-376b-5p   | NM_001199138 | NLRC4 | 0.01718499  | CDS  |
| hsa-miR-483-5p    | NM_001199138 | NLRC4 | 0.01924989  | CDS  |
| hsa-miR-483-3p    | NM_001199138 | NLRC4 | 0.01024658  | CDS  |
| hsa-miR-484       | NM_001199138 | NLRC4 | 1.91E-05    | CDS  |
| hsa-miR-485-5p    | NM_001199138 | NLRC4 | 8.69E-06    | CDS  |
| hsa-miR-485-5p    | NM_001199138 | NLRC4 | 4.35E-05    | CDS  |
| hsa-miR-485-3p    | NM_001199138 | NLRC4 | 2.83E-05    | CDS  |
| hsa-miR-485-3p    | NM_001199138 | NLRC4 | 1.22E-05    | CDS  |
| hsa-miR-486-5p    | NM_001199138 | NLRC4 | 4.54E-05    | CDS  |
| hsa-miR-486-3p    | NM_001199138 | NLRC4 | 6.00E-06    | CDS  |
| hsa-miR-486-3p    | NM_001199138 | NLRC4 | 0.001239845 | CDS  |
| hsa-miR-487a-5p   | NM_001199138 | NLRC4 | 0.001064408 | CDS  |
| hsa-miR-488-5p    | NM_001199138 | NLRC4 | 3.78E-05    | CDS  |
| hsa-miR-488-3p    | NM_001199138 | NLRC4 | 0.000723292 | CDS  |
| hsa-miR-490-5p    | NM_001199138 | NLRC4 | 3.50E-05    | CDS  |
| hsa-miR-490-3p    | NM_001199138 | NLRC4 | 0.001218159 | CDS  |
| hsa-miR-491-5p    | NM_001199138 | NLRC4 | 0.000345859 | CDS  |

|                 |              |       |             |      |
|-----------------|--------------|-------|-------------|------|
| hsa-miR-491-5p  | NM_001199138 | NLRC4 | 0.003560324 | CDS  |
| hsa-miR-491-3p  | NM_001199138 | NLRC4 | 1.14E-05    | CDS  |
| hsa-miR-511-5p  | NM_001199138 | NLRC4 | 0.01050676  | CDS  |
| hsa-miR-511-5p  | NM_001199138 | NLRC4 | 0.1045722   | CDS  |
| hsa-miR-146b-5p | NM_001199138 | NLRC4 | 0.000174632 | CDS  |
| hsa-miR-146b-3p | NM_001199138 | NLRC4 | 0.009341621 | CDS  |
| hsa-miR-202-3p  | NM_001199138 | NLRC4 | 0.000334534 | CDS  |
| hsa-miR-202-3p  | NM_001199138 | NLRC4 | 7.36E-06    | CDS  |
| hsa-miR-492     | NM_001199138 | NLRC4 | 3.78E-05    | CDS  |
| hsa-miR-492     | NM_001199138 | NLRC4 | 0.001633284 | CDS  |
| hsa-miR-493-5p  | NM_001199138 | NLRC4 | 0.001102841 | CDS  |
| hsa-miR-493-3p  | NM_001199138 | NLRC4 | 0.003987316 | CDS  |
| hsa-miR-493-3p  | NM_001199138 | NLRC4 | 0.001058805 | CDS  |
| hsa-miR-493-3p  | NM_001199138 | NLRC4 | 0.000432941 | CDS  |
| hsa-miR-432-5p  | NM_001199138 | NLRC4 | 0.00210636  | CDS  |
| hsa-miR-432-5p  | NM_001199138 | NLRC4 | 0.001013066 | CDS  |
| hsa-miR-432-5p  | NM_001199138 | NLRC4 | 0.02313586  | CDS  |
| hsa-miR-432-3p  | NM_001199138 | NLRC4 | 7.74E-05    | CDS  |
| hsa-miR-432-3p  | NM_001199138 | NLRC4 | 1.96E-05    | CDS  |
| hsa-miR-494-5p  | NM_001199138 | NLRC4 | 0.003523479 | 5UTR |
| hsa-miR-494-5p  | NM_001199138 | NLRC4 | 2.03E-05    | 5UTR |
| hsa-miR-494-5p  | NM_001199138 | NLRC4 | 1.46E-05    | CDS  |
| hsa-miR-494-5p  | NM_001199138 | NLRC4 | 0.000294775 | CDS  |
| hsa-miR-193b-5p | NM_001199138 | NLRC4 | 3.17E-07    | CDS  |
| hsa-miR-193b-5p | NM_001199138 | NLRC4 | 0.007721901 | CDS  |
| hsa-miR-497-5p  | NM_001199138 | NLRC4 | 0.001159809 | CDS  |
| hsa-miR-497-5p  | NM_001199138 | NLRC4 | 7.38E-06    | CDS  |
| hsa-miR-181d-5p | NM_001199138 | NLRC4 | 0.006729548 | CDS  |
| hsa-miR-181d-5p | NM_001199138 | NLRC4 | 7.76E-05    | CDS  |
| hsa-miR-181d-3p | NM_001199138 | NLRC4 | 0.002934367 | CDS  |
| hsa-miR-181d-3p | NM_001199138 | NLRC4 | 3.52E-05    | CDS  |
| hsa-miR-181d-3p | NM_001199138 | NLRC4 | 3.42E-07    | CDS  |
| hsa-miR-512-5p  | NM_001199138 | NLRC4 | 2.31E-05    | CDS  |
| hsa-miR-512-5p  | NM_001199138 | NLRC4 | 2.82E-07    | CDS  |
| hsa-miR-512-3p  | NM_001199138 | NLRC4 | 0.001062038 | CDS  |
| hsa-miR-512-3p  | NM_001199138 | NLRC4 | 8.91E-06    | CDS  |
| hsa-miR-512-3p  | NM_001199138 | NLRC4 | 0.000228649 | CDS  |
| hsa-miR-498-3p  | NM_001199138 | NLRC4 | 0.000125663 | CDS  |
| hsa-miR-498-3p  | NM_001199138 | NLRC4 | 7.01E-06    | CDS  |
| hsa-miR-520e-5p | NM_001199138 | NLRC4 | 0.004557198 | CDS  |
| hsa-miR-515-3p  | NM_001199138 | NLRC4 | 0.02165254  | CDS  |
| hsa-miR-519e-3p | NM_001199138 | NLRC4 | 0.000164596 | CDS  |
| hsa-miR-520f-3p | NM_001199138 | NLRC4 | 0.01495392  | CDS  |
| hsa-miR-519c-5p | NM_001199138 | NLRC4 | 0.004557198 | CDS  |

|                 |              |       |             |      |
|-----------------|--------------|-------|-------------|------|
| hsa-miR-519c-5p | NM_001199138 | NLRC4 | 0.001727314 | CDS  |
| hsa-miR-519c-5p | NM_001199138 | NLRC4 | 1.11E-05    | CDS  |
| hsa-miR-519c-3p | NM_001199138 | NLRC4 | 0.004721326 | CDS  |
| hsa-miR-520a-5p | NM_001199138 | NLRC4 | 1.11E-05    | CDS  |
| hsa-miR-520a-5p | NM_001199138 | NLRC4 | 0.001727314 | CDS  |
| hsa-miR-526b-5p | NM_001199138 | NLRC4 | 0.004557198 | CDS  |
| hsa-miR-526b-5p | NM_001199138 | NLRC4 | 0.000147163 | CDS  |
| hsa-miR-519b-5p | NM_001199138 | NLRC4 | 0.004557198 | CDS  |
| hsa-miR-519b-5p | NM_001199138 | NLRC4 | 0.001727314 | CDS  |
| hsa-miR-519b-5p | NM_001199138 | NLRC4 | 1.11E-05    | CDS  |
| hsa-miR-519b-3p | NM_001199138 | NLRC4 | 0.01064677  | CDS  |
| hsa-miR-525-5p  | NM_001199138 | NLRC4 | 0.001727314 | CDS  |
| hsa-miR-525-5p  | NM_001199138 | NLRC4 | 1.11E-05    | CDS  |
| hsa-miR-525-5p  | NM_001199138 | NLRC4 | 0.001637361 | CDS  |
| hsa-miR-525-3p  | NM_001199138 | NLRC4 | 1.13E-05    | CDS  |
| hsa-miR-525-3p  | NM_001199138 | NLRC4 | 1.86E-05    | CDS  |
| hsa-miR-525-3p  | NM_001199138 | NLRC4 | 0.00151455  | CDS  |
| hsa-miR-523-5p  | NM_001199138 | NLRC4 | 0.004557198 | CDS  |
| hsa-miR-523-5p  | NM_001199138 | NLRC4 | 0.001727314 | CDS  |
| hsa-miR-523-5p  | NM_001199138 | NLRC4 | 1.11E-05    | CDS  |
| hsa-miR-523-3p  | NM_001199138 | NLRC4 | 1.86E-05    | CDS  |
| hsa-miR-518f-5p | NM_001199138 | NLRC4 | 1.11E-05    | CDS  |
| hsa-miR-518f-5p | NM_001199138 | NLRC4 | 0.001727314 | CDS  |
| hsa-miR-518f-3p | NM_001199138 | NLRC4 | 0.004721326 | CDS  |
| hsa-miR-518f-3p | NM_001199138 | NLRC4 | 0.007995041 | CDS  |
| hsa-miR-520b-5p | NM_001199138 | NLRC4 | 5.22E-07    | CDS  |
| hsa-miR-520b-5p | NM_001199138 | NLRC4 | 0.001408827 | CDS  |
| hsa-miR-518b    | NM_001199138 | NLRC4 | 1.61E-05    | CDS  |
| hsa-miR-518b    | NM_001199138 | NLRC4 | 6.37E-06    | CDS  |
| hsa-miR-526a-5p | NM_001199138 | NLRC4 | 0.001727314 | CDS  |
| hsa-miR-526a-5p | NM_001199138 | NLRC4 | 0.004557198 | CDS  |
| hsa-miR-526a-5p | NM_001199138 | NLRC4 | 1.11E-05    | CDS  |
| hsa-miR-520c-5p | NM_001199138 | NLRC4 | 0.001727314 | CDS  |
| hsa-miR-520c-5p | NM_001199138 | NLRC4 | 0.004557198 | CDS  |
| hsa-miR-520c-5p | NM_001199138 | NLRC4 | 1.11E-05    | CDS  |
| hsa-miR-518c-5p | NM_001199138 | NLRC4 | 7.16E-06    | CDS  |
| hsa-miR-518c-5p | NM_001199138 | NLRC4 | 0.002919858 | 5UTR |
| hsa-miR-518c-3p | NM_001199138 | NLRC4 | 6.37E-06    | CDS  |
| hsa-miR-518c-3p | NM_001199138 | NLRC4 | 0.004721326 | CDS  |
| hsa-miR-524-3p  | NM_001199138 | NLRC4 | 1.13E-05    | CDS  |
| hsa-miR-524-3p  | NM_001199138 | NLRC4 | 1.86E-05    | CDS  |
| hsa-miR-524-3p  | NM_001199138 | NLRC4 | 0.000519135 | CDS  |
| hsa-miR-517a-3p | NM_001199138 | NLRC4 | 6.23E-05    | CDS  |
| hsa-miR-519d-5p | NM_001199138 | NLRC4 | 0.000119651 | CDS  |

|                   |              |       |             |     |
|-------------------|--------------|-------|-------------|-----|
| hsa-miR-519d-5p   | NM_001199138 | NLRC4 | 0.01018554  | CDS |
| hsa-miR-519d-3p   | NM_001199138 | NLRC4 | 1.01E-05    | CDS |
| hsa-miR-521       | NM_001199138 | NLRC4 | 6.37E-06    | CDS |
| hsa-miR-520d-3p   | NM_001199138 | NLRC4 | 2.88E-05    | CDS |
| hsa-miR-520d-3p   | NM_001199138 | NLRC4 | 0.004768539 | CDS |
| hsa-miR-517b-3p   | NM_001199138 | NLRC4 | 6.23E-05    | CDS |
| hsa-miR-520g-5p   | NM_001199138 | NLRC4 | 0.001727314 | CDS |
| hsa-miR-516b-5p   | NM_001199138 | NLRC4 | 0.05383761  | CDS |
| hsa-miR-516b-3p   | NM_001199138 | NLRC4 | 0.000301215 | CDS |
| hsa-miR-518e-5p   | NM_001199138 | NLRC4 | 0.004557198 | CDS |
| hsa-miR-518e-5p   | NM_001199138 | NLRC4 | 0.001727314 | CDS |
| hsa-miR-518e-5p   | NM_001199138 | NLRC4 | 1.11E-05    | CDS |
| hsa-miR-518e-3p   | NM_001199138 | NLRC4 | 6.37E-06    | CDS |
| hsa-miR-518e-3p   | NM_001199138 | NLRC4 | 2.59E-05    | CDS |
| hsa-miR-518a-3p   | NM_001199138 | NLRC4 | 0.001815418 | CDS |
| hsa-miR-518d-5p   | NM_001199138 | NLRC4 | 0.001727314 | CDS |
| hsa-miR-518d-5p   | NM_001199138 | NLRC4 | 0.004557198 | CDS |
| hsa-miR-518d-5p   | NM_001199138 | NLRC4 | 1.11E-05    | CDS |
| hsa-miR-518d-3p   | NM_001199138 | NLRC4 | 6.37E-06    | CDS |
| hsa-miR-518d-3p   | NM_001199138 | NLRC4 | 2.79E-05    | CDS |
| hsa-miR-518d-3p   | NM_001199138 | NLRC4 | 2.59E-05    | CDS |
| hsa-miR-522-5p    | NM_001199138 | NLRC4 | 0.004557198 | CDS |
| hsa-miR-522-5p    | NM_001199138 | NLRC4 | 0.001727314 | CDS |
| hsa-miR-522-5p    | NM_001199138 | NLRC4 | 1.11E-05    | CDS |
| hsa-miR-519a-5p   | NM_001199138 | NLRC4 | 0.004557198 | CDS |
| hsa-miR-519a-5p   | NM_001199138 | NLRC4 | 0.001727314 | CDS |
| hsa-miR-519a-5p   | NM_001199138 | NLRC4 | 1.11E-05    | CDS |
| hsa-miR-519a-3p   | NM_001199138 | NLRC4 | 1.01E-05    | CDS |
| hsa-miR-519a-3p   | NM_001199138 | NLRC4 | 0.004721326 | CDS |
| hsa-miR-516a-3p   | NM_001199138 | NLRC4 | 0.000301215 | CDS |
| hsa-miR-519a-2-5p | NM_001199138 | NLRC4 | 5.22E-07    | CDS |
| hsa-miR-519a-2-5p | NM_001199138 | NLRC4 | 0.001408827 | CDS |
| hsa-miR-499a-3p   | NM_001199138 | NLRC4 | 0.000108131 | CDS |
| hsa-miR-500a-5p   | NM_001199138 | NLRC4 | 0.009867866 | CDS |
| hsa-miR-500a-5p   | NM_001199138 | NLRC4 | 0.000187665 | CDS |
| hsa-miR-500a-3p   | NM_001199138 | NLRC4 | 0.000507522 | CDS |
| hsa-miR-500a-3p   | NM_001199138 | NLRC4 | 0.000289672 | CDS |
| hsa-miR-501-5p    | NM_001199138 | NLRC4 | 0.000535268 | CDS |
| hsa-miR-501-3p    | NM_001199138 | NLRC4 | 0.002837809 | CDS |
| hsa-miR-501-3p    | NM_001199138 | NLRC4 | 4.19E-05    | CDS |
| hsa-miR-501-3p    | NM_001199138 | NLRC4 | 6.37E-06    | CDS |
| hsa-miR-502-5p    | NM_001199138 | NLRC4 | 0.000114297 | CDS |
| hsa-miR-502-3p    | NM_001199138 | NLRC4 | 0.002837809 | CDS |
| hsa-miR-502-3p    | NM_001199138 | NLRC4 | 0.000289672 | CDS |

|                   |              |       |             |      |
|-------------------|--------------|-------|-------------|------|
| hsa-miR-502-3p    | NM_001199138 | NLRC4 | 0.1076955   | CDS  |
| hsa-miR-450a-2-3p | NM_001199138 | NLRC4 | 0.000228869 | CDS  |
| hsa-miR-503-5p    | NM_001199138 | NLRC4 | 4.41E-05    | CDS  |
| hsa-miR-503-3p    | NM_001199138 | NLRC4 | 9.02E-06    | CDS  |
| hsa-miR-503-3p    | NM_001199138 | NLRC4 | 0.000511852 | CDS  |
| hsa-miR-504-5p    | NM_001199138 | NLRC4 | 1.82E-06    | CDS  |
| hsa-miR-504-5p    | NM_001199138 | NLRC4 | 0.000535268 | CDS  |
| hsa-miR-504-3p    | NM_001199138 | NLRC4 | 6.44E-05    | CDS  |
| hsa-miR-504-3p    | NM_001199138 | NLRC4 | 0.08715581  | CDS  |
| hsa-miR-505-5p    | NM_001199138 | NLRC4 | 0.001077566 | 5UTR |
| hsa-miR-505-5p    | NM_001199138 | NLRC4 | 0.000268963 | CDS  |
| hsa-miR-505-3p    | NM_001199138 | NLRC4 | 0.006950725 | CDS  |
| hsa-miR-513a-5p   | NM_001199138 | NLRC4 | 1.11E-05    | CDS  |
| hsa-miR-513a-5p   | NM_001199138 | NLRC4 | 0.02825249  | CDS  |
| hsa-miR-506-3p    | NM_001199138 | NLRC4 | 6.37E-06    | CDS  |
| hsa-miR-506-3p    | NM_001199138 | NLRC4 | 0.000519135 | CDS  |
| hsa-miR-507       | NM_001199138 | NLRC4 | 0.00027781  | CDS  |
| hsa-miR-507       | NM_001199138 | NLRC4 | 0.1076955   | CDS  |
| hsa-miR-507       | NM_001199138 | NLRC4 | 7.01E-06    | CDS  |
| hsa-miR-508-5p    | NM_001199138 | NLRC4 | 1.11E-05    | CDS  |
| hsa-miR-508-5p    | NM_001199138 | NLRC4 | 7.38E-06    | CDS  |
| hsa-miR-508-3p    | NM_001199138 | NLRC4 | 0.000170577 | CDS  |
| hsa-miR-508-3p    | NM_001199138 | NLRC4 | 0.006223583 | CDS  |
| hsa-miR-509-5p    | NM_001199138 | NLRC4 | 0.000502803 | CDS  |
| hsa-miR-509-5p    | NM_001199138 | NLRC4 | 1.12E-06    | CDS  |
| hsa-miR-509-3p    | NM_001199138 | NLRC4 | 0.008722516 | CDS  |
| hsa-miR-510-5p    | NM_001199138 | NLRC4 | 6.14E-05    | CDS  |
| hsa-miR-510-5p    | NM_001199138 | NLRC4 | 0.01064963  | CDS  |
| hsa-miR-514a-5p   | NM_001199138 | NLRC4 | 0.001218159 | CDS  |
| hsa-miR-514a-5p   | NM_001199138 | NLRC4 | 0.01391007  | 5UTR |
| hsa-miR-514a-5p   | NM_001199138 | NLRC4 | 5.78E-07    | CDS  |
| hsa-miR-532-5p    | NM_001199138 | NLRC4 | 0.01121372  | 5UTR |
| hsa-miR-532-5p    | NM_001199138 | NLRC4 | 6.96E-05    | CDS  |
| hsa-miR-532-3p    | NM_001199138 | NLRC4 | 0.02111429  | CDS  |
| hsa-miR-455-5p    | NM_001199138 | NLRC4 | 3.16E-05    | CDS  |
| hsa-miR-455-3p    | NM_001199138 | NLRC4 | 1.14E-07    | CDS  |
| hsa-miR-455-3p    | NM_001199138 | NLRC4 | 0.000334534 | CDS  |
| hsa-miR-376a-2-5p | NM_001199138 | NLRC4 | 0.00043678  | CDS  |
| hsa-miR-487b-5p   | NM_001199138 | NLRC4 | 0.01718499  | CDS  |
| hsa-miR-487b-5p   | NM_001199138 | NLRC4 | 0.003248269 | 5UTR |
| hsa-miR-487b-5p   | NM_001199138 | NLRC4 | 1.60E-06    | CDS  |
| hsa-miR-487b-3p   | NM_001199138 | NLRC4 | 0.008906653 | CDS  |
| hsa-miR-551a      | NM_001199138 | NLRC4 | 0.000167343 | CDS  |
| hsa-miR-551a      | NM_001199138 | NLRC4 | 9.54E-06    | CDS  |



|                 |              |       |             |      |
|-----------------|--------------|-------|-------------|------|
| hsa-miR-552-5p  | NM_001199138 | NLRC4 | 8.38E-06    | CDS  |
| hsa-miR-552-3p  | NM_001199138 | NLRC4 | 0.00107409  | CDS  |
| hsa-miR-554     | NM_001199138 | NLRC4 | 6.41E-06    | CDS  |
| hsa-miR-554     | NM_001199138 | NLRC4 | 0.01194815  | CDS  |
| hsa-miR-92b-3p  | NM_001199138 | NLRC4 | 6.16E-05    | CDS  |
| hsa-miR-92b-3p  | NM_001199138 | NLRC4 | 0.01275645  | CDS  |
| hsa-miR-92b-3p  | NM_001199138 | NLRC4 | 9.46E-05    | CDS  |
| hsa-miR-555     | NM_001199138 | NLRC4 | 0.02490019  | CDS  |
| hsa-miR-557     | NM_001199138 | NLRC4 | 0.00059879  | CDS  |
| hsa-miR-557     | NM_001199138 | NLRC4 | 0.0101559   | CDS  |
| hsa-miR-558     | NM_001199138 | NLRC4 | 3.76E-06    | CDS  |
| hsa-miR-564     | NM_001199138 | NLRC4 | 4.24E-05    | CDS  |
| hsa-miR-564     | NM_001199138 | NLRC4 | 5.17E-05    | CDS  |
| hsa-miR-564     | NM_001199138 | NLRC4 | 5.90E-05    | CDS  |
| hsa-miR-564     | NM_001199138 | NLRC4 | 0.02165254  | CDS  |
| hsa-miR-567     | NM_001199138 | NLRC4 | 0.00332693  | CDS  |
| hsa-miR-551b-5p | NM_001199138 | NLRC4 | 0.001006519 | CDS  |
| hsa-miR-551b-5p | NM_001199138 | NLRC4 | 1.91E-05    | CDS  |
| hsa-miR-551b-5p | NM_001199138 | NLRC4 | 0.009181635 | CDS  |
| hsa-miR-551b-3p | NM_001199138 | NLRC4 | 0.000167343 | CDS  |
| hsa-miR-571     | NM_001199138 | NLRC4 | 0.000156752 | CDS  |
| hsa-miR-571     | NM_001199138 | NLRC4 | 0.000112833 | CDS  |
| hsa-miR-572     | NM_001199138 | NLRC4 | 5.54E-06    | CDS  |
| hsa-miR-572     | NM_001199138 | NLRC4 | 7.28E-06    | CDS  |
| hsa-miR-572     | NM_001199138 | NLRC4 | 1.77E-06    | CDS  |
| hsa-miR-573     | NM_001199138 | NLRC4 | 0.006635339 | CDS  |
| hsa-miR-574-5p  | NM_001199138 | NLRC4 | 0.05606478  | CDS  |
| hsa-miR-574-3p  | NM_001199138 | NLRC4 | 6.58E-06    | CDS  |
| hsa-miR-575     | NM_001199138 | NLRC4 | 0.000132382 | CDS  |
| hsa-miR-575     | NM_001199138 | NLRC4 | 0.005855153 | CDS  |
| hsa-miR-578     | NM_001199138 | NLRC4 | 0.000352314 | CDS  |
| hsa-miR-579-5p  | NM_001199138 | NLRC4 | 0.001114676 | CDS  |
| hsa-miR-581     | NM_001199138 | NLRC4 | 0.00998864  | 5UTR |
| hsa-miR-583     | NM_001199138 | NLRC4 | 0.000795975 | CDS  |
| hsa-miR-584-5p  | NM_001199138 | NLRC4 | 0.001051738 | CDS  |
| hsa-miR-584-3p  | NM_001199138 | NLRC4 | 0.000112833 | CDS  |
| hsa-miR-585-5p  | NM_001199138 | NLRC4 | 0.005241017 | CDS  |
| hsa-miR-587     | NM_001199138 | NLRC4 | 0.000121627 | CDS  |
| hsa-miR-587     | NM_001199138 | NLRC4 | 0.001872601 | CDS  |
| hsa-miR-587     | NM_001199138 | NLRC4 | 0.00120872  | CDS  |
| hsa-miR-588     | NM_001199138 | NLRC4 | 0.001503355 | CDS  |
| hsa-miR-588     | NM_001199138 | NLRC4 | 1.60E-06    | CDS  |
| hsa-miR-589-5p  | NM_001199138 | NLRC4 | 1.13E-05    | CDS  |
| hsa-miR-589-5p  | NM_001199138 | NLRC4 | 1.04E-05    | CDS  |

|                 |              |       |             |      |
|-----------------|--------------|-------|-------------|------|
| hsa-miR-550a-5p | NM_001199138 | NLRC4 | 0.07065603  | CDS  |
| hsa-miR-550a-5p | NM_001199138 | NLRC4 | 0.000153631 | CDS  |
| hsa-miR-550a-5p | NM_001199138 | NLRC4 | 0.000133333 | CDS  |
| hsa-miR-550a-3p | NM_001199138 | NLRC4 | 7.08E-06    | CDS  |
| hsa-miR-590-5p  | NM_001199138 | NLRC4 | 0.000129339 | CDS  |
| hsa-miR-593-5p  | NM_001199138 | NLRC4 | 6.98E-06    | CDS  |
| hsa-miR-593-5p  | NM_001199138 | NLRC4 | 5.85E-06    | CDS  |
| hsa-miR-593-5p  | NM_001199138 | NLRC4 | 4.05E-05    | CDS  |
| hsa-miR-593-3p  | NM_001199138 | NLRC4 | 1.82E-05    | CDS  |
| hsa-miR-593-3p  | NM_001199138 | NLRC4 | 6.96E-05    | CDS  |
| hsa-miR-593-3p  | NM_001199138 | NLRC4 | 7.53E-05    | CDS  |
| hsa-miR-595     | NM_001199138 | NLRC4 | 0.000445653 | CDS  |
| hsa-miR-595     | NM_001199138 | NLRC4 | 7.08E-06    | CDS  |
| hsa-miR-595     | NM_001199138 | NLRC4 | 7.55E-05    | CDS  |
| hsa-miR-596     | NM_001199138 | NLRC4 | 1.05E-05    | CDS  |
| hsa-miR-596     | NM_001199138 | NLRC4 | 0.00037471  | CDS  |
| hsa-miR-596     | NM_001199138 | NLRC4 | 0.000646339 | CDS  |
| hsa-miR-597-5p  | NM_001199138 | NLRC4 | 4.30E-06    | CDS  |
| hsa-miR-597-5p  | NM_001199138 | NLRC4 | 2.50E-05    | CDS  |
| hsa-miR-597-5p  | NM_001199138 | NLRC4 | 0.000196593 | CDS  |
| hsa-miR-597-3p  | NM_001199138 | NLRC4 | 0.001064408 | CDS  |
| hsa-miR-598-5p  | NM_001199138 | NLRC4 | 0.01194815  | CDS  |
| hsa-miR-598-5p  | NM_001199138 | NLRC4 | 0.003248269 | 5UTR |
| hsa-miR-600     | NM_001199138 | NLRC4 | 0.000172094 | CDS  |
| hsa-miR-600     | NM_001199138 | NLRC4 | 0.02825249  | CDS  |
| hsa-miR-600     | NM_001199138 | NLRC4 | 0.000926972 | CDS  |
| hsa-miR-601     | NM_001199138 | NLRC4 | 0.02621044  | CDS  |
| hsa-miR-602     | NM_001199138 | NLRC4 | 1.97E-05    | CDS  |
| hsa-miR-602     | NM_001199138 | NLRC4 | 2.06E-05    | CDS  |
| hsa-miR-604     | NM_001199138 | NLRC4 | 0.000294775 | CDS  |
| hsa-miR-604     | NM_001199138 | NLRC4 | 1.77E-06    | CDS  |
| hsa-miR-605-5p  | NM_001199138 | NLRC4 | 0.000245493 | CDS  |
| hsa-miR-605-5p  | NM_001199138 | NLRC4 | 0.000583201 | CDS  |
| hsa-miR-608     | NM_001199138 | NLRC4 | 0.05045639  | CDS  |
| hsa-miR-609     | NM_001199138 | NLRC4 | 0.001262872 | CDS  |
| hsa-miR-609     | NM_001199138 | NLRC4 | 0.000119411 | CDS  |
| hsa-miR-610     | NM_001199138 | NLRC4 | 0.000271137 | CDS  |
| hsa-miR-610     | NM_001199138 | NLRC4 | 0.003134616 | CDS  |
| hsa-miR-611     | NM_001199138 | NLRC4 | 9.54E-06    | CDS  |
| hsa-miR-611     | NM_001199138 | NLRC4 | 1.88E-05    | CDS  |
| hsa-miR-612     | NM_001199138 | NLRC4 | 0.001914154 | CDS  |
| hsa-miR-614     | NM_001199138 | NLRC4 | 0.06684233  | CDS  |
| hsa-miR-614     | NM_001199138 | NLRC4 | 3.90E-05    | CDS  |
| hsa-miR-614     | NM_001199138 | NLRC4 | 8.56E-06    | CDS  |

|                 |              |       |             |      |
|-----------------|--------------|-------|-------------|------|
| hsa-miR-615-5p  | NM_001199138 | NLRC4 | 4.59E-05    | CDS  |
| hsa-miR-615-5p  | NM_001199138 | NLRC4 | 0.00303577  | CDS  |
| hsa-miR-615-3p  | NM_001199138 | NLRC4 | 1.92E-05    | CDS  |
| hsa-miR-616-3p  | NM_001199138 | NLRC4 | 0.0262907   | CDS  |
| hsa-miR-616-3p  | NM_001199138 | NLRC4 | 0.002052023 | CDS  |
| hsa-miR-617     | NM_001199138 | NLRC4 | 0.000302528 | 5UTR |
| hsa-miR-618     | NM_001199138 | NLRC4 | 0.00561403  | CDS  |
| hsa-miR-619-5p  | NM_001199138 | NLRC4 | 0.001027397 | CDS  |
| hsa-miR-619-5p  | NM_001199138 | NLRC4 | 0.000107468 | CDS  |
| hsa-miR-619-5p  | NM_001199138 | NLRC4 | 0.02837663  | CDS  |
| hsa-miR-619-3p  | NM_001199138 | NLRC4 | 0.000104356 | CDS  |
| hsa-miR-619-3p  | NM_001199138 | NLRC4 | 0.01060954  | 5UTR |
| hsa-miR-619-3p  | NM_001199138 | NLRC4 | 0.000406814 | CDS  |
| hsa-miR-621     | NM_001199138 | NLRC4 | 0.000105297 | CDS  |
| hsa-miR-622     | NM_001199138 | NLRC4 | 0.001033441 | CDS  |
| hsa-miR-622     | NM_001199138 | NLRC4 | 0.001445108 | CDS  |
| hsa-miR-623     | NM_001199138 | NLRC4 | 0.006055493 | CDS  |
| hsa-miR-623     | NM_001199138 | NLRC4 | 0.000239915 | CDS  |
| hsa-miR-624-5p  | NM_001199138 | NLRC4 | 1.67E-05    | 5UTR |
| hsa-miR-625-5p  | NM_001199138 | NLRC4 | 0.000795975 | CDS  |
| hsa-miR-625-3p  | NM_001199138 | NLRC4 | 1.60E-05    | CDS  |
| hsa-miR-627-5p  | NM_001199138 | NLRC4 | 0.003661642 | CDS  |
| hsa-miR-628-5p  | NM_001199138 | NLRC4 | 0.001169957 | CDS  |
| hsa-miR-628-3p  | NM_001199138 | NLRC4 | 0.003925449 | CDS  |
| hsa-miR-629-5p  | NM_001199138 | NLRC4 | 0.01919602  | CDS  |
| hsa-miR-629-3p  | NM_001199138 | NLRC4 | 0.000116174 | CDS  |
| hsa-miR-629-3p  | NM_001199138 | NLRC4 | 0.000167343 | CDS  |
| hsa-miR-630     | NM_001199138 | NLRC4 | 0.000469993 | CDS  |
| hsa-miR-33b-5p  | NM_001199138 | NLRC4 | 2.92E-05    | CDS  |
| hsa-miR-33b-3p  | NM_001199138 | NLRC4 | 6.99E-05    | CDS  |
| hsa-miR-33b-3p  | NM_001199138 | NLRC4 | 2.73E-06    | CDS  |
| hsa-miR-632     | NM_001199138 | NLRC4 | 0.00661909  | CDS  |
| hsa-miR-635     | NM_001199138 | NLRC4 | 0.000107277 | CDS  |
| hsa-miR-635     | NM_001199138 | NLRC4 | 0.000326334 | CDS  |
| hsa-miR-636     | NM_001199138 | NLRC4 | 0.001102117 | CDS  |
| hsa-miR-637     | NM_001199138 | NLRC4 | 0.001135043 | CDS  |
| hsa-miR-637     | NM_001199138 | NLRC4 | 0.03273842  | CDS  |
| hsa-miR-637     | NM_001199138 | NLRC4 | 1.96E-05    | CDS  |
| hsa-miR-638     | NM_001199138 | NLRC4 | 0.00303577  | CDS  |
| hsa-miR-638     | NM_001199138 | NLRC4 | 5.17E-05    | CDS  |
| hsa-miR-639     | NM_001199138 | NLRC4 | 0.01340961  | CDS  |
| hsa-miR-639     | NM_001199138 | NLRC4 | 0.00011008  | CDS  |
| hsa-miR-642a-5p | NM_001199138 | NLRC4 | 0.000148632 | CDS  |
| hsa-miR-642a-3p | NM_001199138 | NLRC4 | 0.003190413 | CDS  |

|                 |              |       |             |     |
|-----------------|--------------|-------|-------------|-----|
| hsa-miR-644a    | NM_001199138 | NLRC4 | 3.82E-05    | CDS |
| hsa-miR-644a    | NM_001199138 | NLRC4 | 0.000379735 | CDS |
| hsa-miR-645     | NM_001199138 | NLRC4 | 0.03159106  | CDS |
| hsa-miR-646     | NM_001199138 | NLRC4 | 0.009935842 | CDS |
| hsa-miR-649     | NM_001199138 | NLRC4 | 0.00372152  | CDS |
| hsa-miR-650     | NM_001199138 | NLRC4 | 0.000142999 | CDS |
| hsa-miR-650     | NM_001199138 | NLRC4 | 3.18E-05    | CDS |
| hsa-miR-652-5p  | NM_001199138 | NLRC4 | 3.41E-06    | CDS |
| hsa-miR-652-5p  | NM_001199138 | NLRC4 | 0.00013388  | CDS |
| hsa-miR-652-5p  | NM_001199138 | NLRC4 | 0.002217478 | CDS |
| hsa-miR-652-3p  | NM_001199138 | NLRC4 | 9.56E-06    | CDS |
| hsa-miR-661     | NM_001199138 | NLRC4 | 2.92E-05    | CDS |
| hsa-miR-661     | NM_001199138 | NLRC4 | 0.004730357 | CDS |
| hsa-miR-662     | NM_001199138 | NLRC4 | 4.84E-07    | CDS |
| hsa-miR-662     | NM_001199138 | NLRC4 | 1.08E-05    | CDS |
| hsa-miR-662     | NM_001199138 | NLRC4 | 3.50E-05    | CDS |
| hsa-miR-662     | NM_001199138 | NLRC4 | 0.000778346 | CDS |
| hsa-miR-663a    | NM_001199138 | NLRC4 | 1.00E-06    | CDS |
| hsa-miR-663a    | NM_001199138 | NLRC4 | 2.10E-06    | CDS |
| hsa-miR-449b-5p | NM_001199138 | NLRC4 | 9.79E-05    | CDS |
| hsa-miR-449b-3p | NM_001199138 | NLRC4 | 0.000174645 | CDS |
| hsa-miR-449b-3p | NM_001199138 | NLRC4 | 1.46E-05    | CDS |
| hsa-miR-654-5p  | NM_001199138 | NLRC4 | 0.002815688 | CDS |
| hsa-miR-654-3p  | NM_001199138 | NLRC4 | 0.000235004 | CDS |
| hsa-miR-655-5p  | NM_001199138 | NLRC4 | 0.02268423  | CDS |
| hsa-miR-655-5p  | NM_001199138 | NLRC4 | 5.97E-06    | CDS |
| hsa-miR-656-5p  | NM_001199138 | NLRC4 | 0.00498711  | CDS |
| hsa-miR-656-5p  | NM_001199138 | NLRC4 | 7.24E-05    | CDS |
| hsa-miR-656-5p  | NM_001199138 | NLRC4 | 0.006198772 | CDS |
| hsa-miR-549a-5p | NM_001199138 | NLRC4 | 0.000170659 | CDS |
| hsa-miR-549a-5p | NM_001199138 | NLRC4 | 0.000129339 | CDS |
| hsa-miR-549a-5p | NM_001199138 | NLRC4 | 0.000953849 | CDS |
| hsa-miR-657     | NM_001199138 | NLRC4 | 6.08E-06    | CDS |
| hsa-miR-657     | NM_001199138 | NLRC4 | 7.45E-06    | CDS |
| hsa-miR-658     | NM_001199138 | NLRC4 | 0.003824517 | CDS |
| hsa-miR-659-5p  | NM_001199138 | NLRC4 | 0.000125663 | CDS |
| hsa-miR-659-3p  | NM_001199138 | NLRC4 | 0.04526314  | CDS |
| hsa-miR-659-3p  | NM_001199138 | NLRC4 | 0.000267696 | CDS |
| hsa-miR-659-3p  | NM_001199138 | NLRC4 | 0.004030374 | CDS |
| hsa-miR-660-3p  | NM_001199138 | NLRC4 | 0.001022618 | CDS |
| hsa-miR-660-3p  | NM_001199138 | NLRC4 | 0.03271231  | CDS |
| hsa-miR-542-5p  | NM_001199138 | NLRC4 | 0.000509192 | CDS |
| hsa-miR-542-5p  | NM_001199138 | NLRC4 | 0.000511852 | CDS |
| hsa-miR-542-5p  | NM_001199138 | NLRC4 | 0.005514936 | CDS |

|                   |              |       |             |      |
|-------------------|--------------|-------|-------------|------|
| hsa-miR-758-3p    | NM_001199138 | NLRC4 | 0.000123515 | CDS  |
| hsa-miR-671-5p    | NM_001199138 | NLRC4 | 4.59E-05    | CDS  |
| hsa-miR-671-5p    | NM_001199138 | NLRC4 | 0.000671559 | CDS  |
| hsa-miR-671-5p    | NM_001199138 | NLRC4 | 1.53E-05    | CDS  |
| hsa-miR-671-3p    | NM_001199138 | NLRC4 | 7.28E-06    | CDS  |
| hsa-miR-671-3p    | NM_001199138 | NLRC4 | 5.45E-06    | CDS  |
| hsa-miR-671-3p    | NM_001199138 | NLRC4 | 1.92E-05    | CDS  |
| hsa-miR-668-5p    | NM_001199138 | NLRC4 | 1.14E-07    | CDS  |
| hsa-miR-668-5p    | NM_001199138 | NLRC4 | 0.006396492 | CDS  |
| hsa-miR-668-3p    | NM_001199138 | NLRC4 | 0.000196593 | CDS  |
| hsa-miR-668-3p    | NM_001199138 | NLRC4 | 1.46E-05    | CDS  |
| hsa-miR-668-3p    | NM_001199138 | NLRC4 | 0.000113041 | CDS  |
| hsa-miR-550a-3-5p | NM_001199138 | NLRC4 | 2.73E-06    | CDS  |
| hsa-miR-550a-3-5p | NM_001199138 | NLRC4 | 0.000133333 | CDS  |
| hsa-miR-767-5p    | NM_001199138 | NLRC4 | 0.1076955   | CDS  |
| hsa-miR-767-3p    | NM_001199138 | NLRC4 | 0.003923357 | CDS  |
| hsa-miR-1224-5p   | NM_001199138 | NLRC4 | 0.01341104  | 5UTR |
| hsa-miR-1224-3p   | NM_001199138 | NLRC4 | 0.000612062 | CDS  |
| hsa-miR-151b      | NM_001199138 | NLRC4 | 0.001239845 | CDS  |
| hsa-miR-320b      | NM_001199138 | NLRC4 | 4.24E-05    | CDS  |
| hsa-miR-320b      | NM_001199138 | NLRC4 | 0.001567866 | CDS  |
| hsa-miR-320c      | NM_001199138 | NLRC4 | 0.001567866 | CDS  |
| hsa-miR-320c      | NM_001199138 | NLRC4 | 0.02227046  | CDS  |
| hsa-miR-1296-5p   | NM_001199138 | NLRC4 | 0.001661235 | CDS  |
| hsa-miR-1296-5p   | NM_001199138 | NLRC4 | 6.65E-06    | CDS  |
| hsa-miR-1296-5p   | NM_001199138 | NLRC4 | 1.35E-05    | CDS  |
| hsa-miR-1296-3p   | NM_001199138 | NLRC4 | 2.06E-05    | CDS  |
| hsa-miR-1296-3p   | NM_001199138 | NLRC4 | 0.01438959  | 5UTR |
| hsa-miR-1468-5p   | NM_001199138 | NLRC4 | 0.000719145 | CDS  |
| hsa-miR-1323      | NM_001199138 | NLRC4 | 0.000241027 | CDS  |
| hsa-miR-1271-5p   | NM_001199138 | NLRC4 | 0.000250561 | CDS  |
| hsa-miR-1271-5p   | NM_001199138 | NLRC4 | 6.98E-06    | CDS  |
| hsa-miR-1271-3p   | NM_001199138 | NLRC4 | 7.25E-06    | CDS  |
| hsa-miR-1271-3p   | NM_001199138 | NLRC4 | 0.000945067 | CDS  |
| hsa-miR-1301-5p   | NM_001199138 | NLRC4 | 6.58E-06    | CDS  |
| hsa-miR-1301-5p   | NM_001199138 | NLRC4 | 1.98E-07    | CDS  |
| hsa-miR-1301-3p   | NM_001199138 | NLRC4 | 3.55E-05    | CDS  |
| hsa-miR-1301-3p   | NM_001199138 | NLRC4 | 0.01194815  | CDS  |
| hsa-miR-1185-2-3p | NM_001199138 | NLRC4 | 0.002677635 | CDS  |
| hsa-miR-1185-2-3p | NM_001199138 | NLRC4 | 0.0716699   | CDS  |
| hsa-miR-449c-5p   | NM_001199138 | NLRC4 | 9.79E-05    | CDS  |
| hsa-miR-449c-5p   | NM_001199138 | NLRC4 | 5.17E-05    | CDS  |
| hsa-miR-449c-5p   | NM_001199138 | NLRC4 | 0.00498711  | CDS  |
| hsa-miR-449c-3p   | NM_001199138 | NLRC4 | 0.000584143 | CDS  |

|                   |              |       |             |      |
|-------------------|--------------|-------|-------------|------|
| hsa-miR-1283      | NM_001199138 | NLRC4 | 0.002143507 | CDS  |
| hsa-miR-769-5p    | NM_001199138 | NLRC4 | 0.000125663 | CDS  |
| hsa-miR-769-5p    | NM_001199138 | NLRC4 | 0.01390878  | CDS  |
| hsa-miR-769-3p    | NM_001199138 | NLRC4 | 1.96E-05    | CDS  |
| hsa-miR-769-3p    | NM_001199138 | NLRC4 | 0.005273831 | CDS  |
| hsa-miR-766-5p    | NM_001199138 | NLRC4 | 0.05611306  | CDS  |
| hsa-miR-766-3p    | NM_001199138 | NLRC4 | 9.24E-06    | CDS  |
| hsa-miR-378d      | NM_001199138 | NLRC4 | 0.003596187 | CDS  |
| hsa-miR-378d      | NM_001199138 | NLRC4 | 0.01439129  | CDS  |
| hsa-miR-1185-1-3p | NM_001199138 | NLRC4 | 0.002677635 | CDS  |
| hsa-miR-762       | NM_001199138 | NLRC4 | 3.17E-07    | CDS  |
| hsa-miR-762       | NM_001199138 | NLRC4 | 0.000608953 | CDS  |
| hsa-miR-762       | NM_001199138 | NLRC4 | 0.000133333 | CDS  |
| hsa-miR-802       | NM_001199138 | NLRC4 | 0.001836158 | CDS  |
| hsa-miR-670-5p    | NM_001199138 | NLRC4 | 0.05124352  | CDS  |
| hsa-miR-1298-5p   | NM_001199138 | NLRC4 | 0.002191822 | 5UTR |
| hsa-miR-1298-3p   | NM_001199138 | NLRC4 | 6.05E-07    | CDS  |
| hsa-miR-1298-3p   | NM_001199138 | NLRC4 | 0.2724825   | CDS  |
| hsa-miR-2113      | NM_001199138 | NLRC4 | 0.02338689  | CDS  |
| hsa-miR-761       | NM_001199138 | NLRC4 | 0.006362695 | CDS  |
| hsa-miR-764       | NM_001199138 | NLRC4 | 0.001033441 | CDS  |
| hsa-miR-765       | NM_001199138 | NLRC4 | 0.05383761  | CDS  |
| hsa-miR-765       | NM_001199138 | NLRC4 | 0.00101605  | 5UTR |
| hsa-miR-675-5p    | NM_001199138 | NLRC4 | 5.49E-05    | CDS  |
| hsa-miR-675-5p    | NM_001199138 | NLRC4 | 0.000345859 | CDS  |
| hsa-miR-675-5p    | NM_001199138 | NLRC4 | 0.01181189  | CDS  |
| hsa-miR-675-3p    | NM_001199138 | NLRC4 | 0.009187106 | CDS  |
| hsa-miR-298       | NM_001199138 | NLRC4 | 0.000147956 | CDS  |
| hsa-miR-891a-5p   | NM_001199138 | NLRC4 | 0.06961787  | CDS  |
| hsa-miR-892a      | NM_001199138 | NLRC4 | 0.00329055  | CDS  |
| hsa-miR-892a      | NM_001199138 | NLRC4 | 0.000972019 | CDS  |
| hsa-miR-450b-3p   | NM_001199138 | NLRC4 | 1.51E-05    | CDS  |
| hsa-miR-450b-3p   | NM_001199138 | NLRC4 | 0.000249844 | CDS  |
| hsa-miR-450b-3p   | NM_001199138 | NLRC4 | 1.35E-05    | CDS  |
| hsa-miR-874-5p    | NM_001199138 | NLRC4 | 0.002426029 | CDS  |
| hsa-miR-874-3p    | NM_001199138 | NLRC4 | 4.84E-07    | CDS  |
| hsa-miR-888-5p    | NM_001199138 | NLRC4 | 8.94E-05    | CDS  |
| hsa-miR-888-3p    | NM_001199138 | NLRC4 | 0.000802077 | CDS  |
| hsa-miR-892b      | NM_001199138 | NLRC4 | 0.01837384  | CDS  |
| hsa-miR-541-5p    | NM_001199138 | NLRC4 | 0.06759073  | CDS  |
| hsa-miR-541-5p    | NM_001199138 | NLRC4 | 0.01507619  | CDS  |
| hsa-miR-541-3p    | NM_001199138 | NLRC4 | 0.00842643  | CDS  |
| hsa-miR-889-5p    | NM_001199138 | NLRC4 | 5.30E-07    | CDS  |
| hsa-miR-875-5p    | NM_001199138 | NLRC4 | 2.31E-05    | CDS  |

|                  |              |       |             |     |
|------------------|--------------|-------|-------------|-----|
| hsa-miR-875-3p   | NM_001199138 | NLRC4 | 1.04E-05    | CDS |
| hsa-miR-876-5p   | NM_001199138 | NLRC4 | 0.01472951  | CDS |
| hsa-miR-876-5p   | NM_001199138 | NLRC4 | 0.000324703 | CDS |
| hsa-miR-708-5p   | NM_001199138 | NLRC4 | 0.001633284 | CDS |
| hsa-miR-708-5p   | NM_001199138 | NLRC4 | 3.69E-06    | CDS |
| hsa-miR-708-3p   | NM_001199138 | NLRC4 | 0.000479692 | CDS |
| hsa-miR-147b-5p  | NM_001199138 | NLRC4 | 0.002573208 | CDS |
| hsa-miR-147b-3p  | NM_001199138 | NLRC4 | 9.72E-05    | CDS |
| hsa-miR-744-5p   | NM_001199138 | NLRC4 | 0.001670142 | CDS |
| hsa-miR-744-5p   | NM_001199138 | NLRC4 | 1.19E-06    | CDS |
| hsa-miR-885-3p   | NM_001199138 | NLRC4 | 0.00237631  | CDS |
| hsa-miR-877-5p   | NM_001199138 | NLRC4 | 0.01148179  | CDS |
| hsa-miR-877-3p   | NM_001199138 | NLRC4 | 0.000583201 | CDS |
| hsa-miR-877-3p   | NM_001199138 | NLRC4 | 0.000475498 | CDS |
| hsa-miR-887-5p   | NM_001199138 | NLRC4 | 8.80E-06    | CDS |
| hsa-miR-887-5p   | NM_001199138 | NLRC4 | 0.001633284 | CDS |
| hsa-miR-887-3p   | NM_001199138 | NLRC4 | 9.29E-05    | CDS |
| hsa-miR-665      | NM_001199138 | NLRC4 | 0.000146875 | CDS |
| hsa-miR-873-5p   | NM_001199138 | NLRC4 | 0.003518183 | CDS |
| hsa-miR-873-5p   | NM_001199138 | NLRC4 | 0.000187515 | CDS |
| hsa-miR-873-3p   | NM_001199138 | NLRC4 | 0.01313369  | CDS |
| hsa-miR-873-3p   | NM_001199138 | NLRC4 | 0.02490019  | CDS |
| hsa-miR-873-3p   | NM_001199138 | NLRC4 | 0.005860441 | CDS |
| hsa-miR-374b-3p  | NM_001199138 | NLRC4 | 0.003455527 | CDS |
| hsa-miR-374b-3p  | NM_001199138 | NLRC4 | 0.003864711 | CDS |
| hsa-miR-760      | NM_001199138 | NLRC4 | 4.06E-07    | CDS |
| hsa-miR-760      | NM_001199138 | NLRC4 | 4.84E-07    | CDS |
| hsa-miR-301b-5p  | NM_001199138 | NLRC4 | 1.10E-08    | CDS |
| hsa-miR-216b-3p  | NM_001199138 | NLRC4 | 0.008364013 | CDS |
| hsa-miR-216b-3p  | NM_001199138 | NLRC4 | 0.00089255  | CDS |
| hsa-miR-920      | NM_001199138 | NLRC4 | 0.001239845 | CDS |
| hsa-miR-920      | NM_001199138 | NLRC4 | 0.0264118   | CDS |
| hsa-miR-922      | NM_001199138 | NLRC4 | 0.006362695 | CDS |
| hsa-miR-924      | NM_001199138 | NLRC4 | 0.002209893 | CDS |
| hsa-miR-924      | NM_001199138 | NLRC4 | 0.000598122 | CDS |
| hsa-miR-509-3-5p | NM_001199138 | NLRC4 | 1.23E-05    | CDS |
| hsa-miR-509-3-5p | NM_001199138 | NLRC4 | 0.000502803 | CDS |
| hsa-miR-933      | NM_001199138 | NLRC4 | 7.53E-05    | CDS |
| hsa-miR-934      | NM_001199138 | NLRC4 | 8.86E-07    | CDS |
| hsa-miR-934      | NM_001199138 | NLRC4 | 0.000271137 | CDS |
| hsa-miR-935      | NM_001199138 | NLRC4 | 6.67E-05    | CDS |
| hsa-miR-936      | NM_001199138 | NLRC4 | 0.004898831 | CDS |
| hsa-miR-937-5p   | NM_001199138 | NLRC4 | 0.003661642 | CDS |
| hsa-miR-937-5p   | NM_001199138 | NLRC4 | 6.02E-08    | CDS |

|                 |              |       |             |      |
|-----------------|--------------|-------|-------------|------|
| hsa-miR-939-5p  | NM_001199138 | NLRC4 | 2.62E-05    | CDS  |
| hsa-miR-939-5p  | NM_001199138 | NLRC4 | 0.000608953 | CDS  |
| hsa-miR-939-3p  | NM_001199138 | NLRC4 | 7.16E-06    | CDS  |
| hsa-miR-939-3p  | NM_001199138 | NLRC4 | 0.00014298  | CDS  |
| hsa-miR-940     | NM_001199138 | NLRC4 | 0.02490019  | CDS  |
| hsa-miR-941     | NM_001199138 | NLRC4 | 0.000347827 | CDS  |
| hsa-miR-942-5p  | NM_001199138 | NLRC4 | 1.08E-05    | CDS  |
| hsa-miR-943     | NM_001199138 | NLRC4 | 0.00085614  | CDS  |
| hsa-miR-1178-5p | NM_001199138 | NLRC4 | 0.000441636 | CDS  |
| hsa-miR-1178-3p | NM_001199138 | NLRC4 | 0.003923357 | CDS  |
| hsa-miR-1180-5p | NM_001199138 | NLRC4 | 7.28E-06    | CDS  |
| hsa-miR-1180-5p | NM_001199138 | NLRC4 | 0.000226722 | CDS  |
| hsa-miR-1180-3p | NM_001199138 | NLRC4 | 6.26E-05    | CDS  |
| hsa-miR-1181    | NM_001199138 | NLRC4 | 5.97E-06    | CDS  |
| hsa-miR-1181    | NM_001199138 | NLRC4 | 0.06641009  | CDS  |
| hsa-miR-1181    | NM_001199138 | NLRC4 | 0.005613622 | CDS  |
| hsa-miR-1182    | NM_001199138 | NLRC4 | 0.02261598  | CDS  |
| hsa-miR-1182    | NM_001199138 | NLRC4 | 0.000671559 | CDS  |
| hsa-miR-1182    | NM_001199138 | NLRC4 | 7.19E-05    | CDS  |
| hsa-miR-1183    | NM_001199138 | NLRC4 | 9.39E-05    | CDS  |
| hsa-miR-1183    | NM_001199138 | NLRC4 | 2.57E-05    | CDS  |
| hsa-miR-1183    | NM_001199138 | NLRC4 | 0.000566436 | CDS  |
| hsa-miR-1184    | NM_001199138 | NLRC4 | 1.92E-05    | CDS  |
| hsa-miR-1225-5p | NM_001199138 | NLRC4 | 0.000281735 | CDS  |
| hsa-miR-1225-3p | NM_001199138 | NLRC4 | 8.56E-06    | CDS  |
| hsa-miR-1226-5p | NM_001199138 | NLRC4 | 0.000293001 | CDS  |
| hsa-miR-1226-3p | NM_001199138 | NLRC4 | 0.006567177 | CDS  |
| hsa-miR-1227-5p | NM_001199138 | NLRC4 | 2.28E-05    | CDS  |
| hsa-miR-1227-5p | NM_001199138 | NLRC4 | 0.01108732  | CDS  |
| hsa-miR-1227-5p | NM_001199138 | NLRC4 | 9.02E-05    | CDS  |
| hsa-miR-1227-5p | NM_001199138 | NLRC4 | 5.97E-06    | CDS  |
| hsa-miR-1227-3p | NM_001199138 | NLRC4 | 0.000196593 | CDS  |
| hsa-miR-1228-5p | NM_001199138 | NLRC4 | 0.000799382 | CDS  |
| hsa-miR-1229-5p | NM_001199138 | NLRC4 | 1.00E-06    | CDS  |
| hsa-miR-1229-5p | NM_001199138 | NLRC4 | 0.000133333 | CDS  |
| hsa-miR-1229-5p | NM_001199138 | NLRC4 | 0.000129336 | CDS  |
| hsa-miR-1231    | NM_001199138 | NLRC4 | 0.000799382 | CDS  |
| hsa-miR-1231    | NM_001199138 | NLRC4 | 0.007684299 | CDS  |
| hsa-miR-1233-5p | NM_001199138 | NLRC4 | 1.85E-05    | CDS  |
| hsa-miR-1233-5p | NM_001199138 | NLRC4 | 4.98E-06    | CDS  |
| hsa-miR-1233-5p | NM_001199138 | NLRC4 | 0.02230438  | CDS  |
| hsa-miR-1233-5p | NM_001199138 | NLRC4 | 0.000276588 | 5UTR |
| hsa-miR-1233-3p | NM_001199138 | NLRC4 | 7.68E-06    | CDS  |
| hsa-miR-1233-3p | NM_001199138 | NLRC4 | 1.53E-05    | CDS  |



|                 |              |       |             |     |
|-----------------|--------------|-------|-------------|-----|
| hsa-miR-1234-3p | NM_001199138 | NLRC4 | 1.46E-05    | CDS |
| hsa-miR-1236-5p | NM_001199138 | NLRC4 | 0.000535509 | CDS |
| hsa-miR-1236-5p | NM_001199138 | NLRC4 | 0.1613492   | CDS |
| hsa-miR-1236-3p | NM_001199138 | NLRC4 | 0.000259323 | CDS |
| hsa-miR-1236-3p | NM_001199138 | NLRC4 | 0.000475498 | CDS |
| hsa-miR-1237-5p | NM_001199138 | NLRC4 | 9.25E-07    | CDS |
| hsa-miR-1237-5p | NM_001199138 | NLRC4 | 1.33E-07    | CDS |
| hsa-miR-1237-3p | NM_001199138 | NLRC4 | 0.0210857   | CDS |
| hsa-miR-1237-3p | NM_001199138 | NLRC4 | 0.01276016  | CDS |
| hsa-miR-1238-5p | NM_001199138 | NLRC4 | 2.59E-05    | CDS |
| hsa-miR-1200    | NM_001199138 | NLRC4 | 0.01928178  | CDS |
| hsa-miR-1202    | NM_001199138 | NLRC4 | 6.57E-06    | CDS |
| hsa-miR-1202    | NM_001199138 | NLRC4 | 0.000671559 | CDS |
| hsa-miR-1202    | NM_001199138 | NLRC4 | 1.12E-05    | CDS |
| hsa-miR-1203    | NM_001199138 | NLRC4 | 0.001218159 | CDS |
| hsa-miR-1203    | NM_001199138 | NLRC4 | 4.98E-06    | CDS |
| hsa-miR-1203    | NM_001199138 | NLRC4 | 0.00210636  | CDS |
| hsa-miR-663b    | NM_001199138 | NLRC4 | 1.91E-05    | CDS |
| hsa-miR-663b    | NM_001199138 | NLRC4 | 5.47E-06    | CDS |
| hsa-miR-663b    | NM_001199138 | NLRC4 | 1.60E-06    | CDS |
| hsa-miR-1204    | NM_001199138 | NLRC4 | 1.16E-05    | CDS |
| hsa-miR-1204    | NM_001199138 | NLRC4 | 0.000511852 | CDS |
| hsa-miR-1205    | NM_001199138 | NLRC4 | 2.13E-05    | CDS |
| hsa-miR-1205    | NM_001199138 | NLRC4 | 0.002435779 | CDS |
| hsa-miR-1206    | NM_001199138 | NLRC4 | 0.009066731 | CDS |
| hsa-miR-1207-5p | NM_001199138 | NLRC4 | 0.002365478 | CDS |
| hsa-miR-1207-5p | NM_001199138 | NLRC4 | 1.85E-05    | CDS |
| hsa-miR-1207-5p | NM_001199138 | NLRC4 | 0.000133333 | CDS |
| hsa-miR-1208    | NM_001199138 | NLRC4 | 0.00011008  | CDS |
| hsa-miR-1285-5p | NM_001199138 | NLRC4 | 0.002434622 | CDS |
| hsa-miR-1285-5p | NM_001199138 | NLRC4 | 0.05384545  | CDS |
| hsa-miR-1285-3p | NM_001199138 | NLRC4 | 0.02595679  | CDS |
| hsa-miR-1285-3p | NM_001199138 | NLRC4 | 8.80E-06    | CDS |
| hsa-miR-1286    | NM_001199138 | NLRC4 | 0.000496463 | CDS |
| hsa-miR-1286    | NM_001199138 | NLRC4 | 0.007362526 | CDS |
| hsa-miR-1286    | NM_001199138 | NLRC4 | 0.001014772 | CDS |
| hsa-miR-1287-5p | NM_001199138 | NLRC4 | 0.000308712 | CDS |
| hsa-miR-1287-5p | NM_001199138 | NLRC4 | 0.03853267  | CDS |
| hsa-miR-1287-3p | NM_001199138 | NLRC4 | 1.56E-05    | CDS |
| hsa-miR-1287-3p | NM_001199138 | NLRC4 | 2.94E-05    | CDS |
| hsa-miR-1289    | NM_001199138 | NLRC4 | 0.000478711 | CDS |
| hsa-miR-1289    | NM_001199138 | NLRC4 | 0.01176218  | CDS |
| hsa-miR-1290    | NM_001199138 | NLRC4 | 0.01767896  | CDS |
| hsa-miR-1290    | NM_001199138 | NLRC4 | 0.1541459   | CDS |

|                 |              |       |             |      |
|-----------------|--------------|-------|-------------|------|
| hsa-miR-1291    | NM_001199138 | NLRC4 | 0.001025993 | CDS  |
| hsa-miR-1293    | NM_001199138 | NLRC4 | 0.01861651  | CDS  |
| hsa-miR-1294    | NM_001199138 | NLRC4 | 8.35E-05    | CDS  |
| hsa-miR-1294    | NM_001199138 | NLRC4 | 0.001710859 | CDS  |
| hsa-miR-1299    | NM_001199138 | NLRC4 | 1.81E-05    | CDS  |
| hsa-miR-1299    | NM_001199138 | NLRC4 | 0.04943221  | CDS  |
| hsa-miR-1299    | NM_001199138 | NLRC4 | 0.003678081 | 5UTR |
| hsa-miR-1303    | NM_001199138 | NLRC4 | 0.000260618 | CDS  |
| hsa-miR-1303    | NM_001199138 | NLRC4 | 0.000214933 | CDS  |
| hsa-miR-1304-5p | NM_001199138 | NLRC4 | 5.56E-06    | CDS  |
| hsa-miR-1304-5p | NM_001199138 | NLRC4 | 0.01135737  | CDS  |
| hsa-miR-1304-3p | NM_001199138 | NLRC4 | 0.01501814  | CDS  |
| hsa-miR-1304-3p | NM_001199138 | NLRC4 | 0.000107543 | CDS  |
| hsa-miR-1245a   | NM_001199138 | NLRC4 | 0.000167343 | CDS  |
| hsa-miR-1246    | NM_001199138 | NLRC4 | 0.1541459   | CDS  |
| hsa-miR-1246    | NM_001199138 | NLRC4 | 0.142157    | CDS  |
| hsa-miR-1246    | NM_001199138 | NLRC4 | 0.000724533 | CDS  |
| hsa-miR-1246    | NM_001199138 | NLRC4 | 0.01767896  | CDS  |
| hsa-miR-1247-5p | NM_001199138 | NLRC4 | 0.00013388  | CDS  |
| hsa-miR-1247-3p | NM_001199138 | NLRC4 | 7.16E-06    | CDS  |
| hsa-miR-1248    | NM_001199138 | NLRC4 | 0.000519698 | CDS  |
| hsa-miR-1248    | NM_001199138 | NLRC4 | 0.000493929 | CDS  |
| hsa-miR-1249-5p | NM_001199138 | NLRC4 | 0.05553747  | CDS  |
| hsa-miR-1250-5p | NM_001199138 | NLRC4 | 0.006122178 | CDS  |
| hsa-miR-1250-3p | NM_001199138 | NLRC4 | 4.89E-06    | CDS  |
| hsa-miR-1251-5p | NM_001199138 | NLRC4 | 1.56E-05    | CDS  |
| hsa-miR-1251-3p | NM_001199138 | NLRC4 | 0.000167343 | CDS  |
| hsa-miR-1253    | NM_001199138 | NLRC4 | 0.001088706 | CDS  |
| hsa-miR-1257    | NM_001199138 | NLRC4 | 0.000535509 | CDS  |
| hsa-miR-1261    | NM_001199138 | NLRC4 | 0.000977407 | CDS  |
| hsa-miR-1261    | NM_001199138 | NLRC4 | 0.02787945  | CDS  |
| hsa-miR-1263    | NM_001199138 | NLRC4 | 0.02083531  | CDS  |
| hsa-miR-1263    | NM_001199138 | NLRC4 | 0.001064408 | CDS  |
| hsa-miR-1265    | NM_001199138 | NLRC4 | 0.08647864  | CDS  |
| hsa-miR-1265    | NM_001199138 | NLRC4 | 0.009768947 | CDS  |
| hsa-miR-1266-5p | NM_001199138 | NLRC4 | 0.000326334 | CDS  |
| hsa-miR-1266-5p | NM_001199138 | NLRC4 | 2.23E-07    | CDS  |
| hsa-miR-1266-3p | NM_001199138 | NLRC4 | 0.001456926 | CDS  |
| hsa-miR-1266-3p | NM_001199138 | NLRC4 | 0.001083295 | CDS  |
| hsa-miR-1267    | NM_001199138 | NLRC4 | 0.00014298  | CDS  |
| hsa-miR-1268a   | NM_001199138 | NLRC4 | 0.001170791 | CDS  |
| hsa-miR-1269a   | NM_001199138 | NLRC4 | 0.000238785 | CDS  |
| hsa-miR-1269a   | NM_001199138 | NLRC4 | 0.003596187 | CDS  |
| hsa-miR-1269a   | NM_001199138 | NLRC4 | 0.01439129  | CDS  |

|                    |              |       |             |      |
|--------------------|--------------|-------|-------------|------|
| hsa-miR-1270       | NM_001199138 | NLRC4 | 0.08822971  | CDS  |
| hsa-miR-1272       | NM_001199138 | NLRC4 | 0.01064677  | CDS  |
| hsa-miR-1275       | NM_001199138 | NLRC4 | 0.01058857  | CDS  |
| hsa-miR-1276       | NM_001199138 | NLRC4 | 0.000671559 | CDS  |
| hsa-miR-1276       | NM_001199138 | NLRC4 | 0.000503184 | 5UTR |
| hsa-miR-1276       | NM_001199138 | NLRC4 | 3.78E-05    | CDS  |
| hsa-miR-548i       | NM_001199138 | NLRC4 | 0.0527194   | CDS  |
| hsa-miR-1281       | NM_001199138 | NLRC4 | 0.003672413 | CDS  |
| hsa-miR-1282       | NM_001199138 | NLRC4 | 0.0002043   | 5UTR |
| hsa-miR-1288-5p    | NM_001199138 | NLRC4 | 0.006232519 | CDS  |
| hsa-miR-1288-3p    | NM_001199138 | NLRC4 | 6.39E-05    | CDS  |
| hsa-miR-1292-5p    | NM_001199138 | NLRC4 | 0.03090052  | CDS  |
| hsa-miR-1292-5p    | NM_001199138 | NLRC4 | 4.03E-05    | CDS  |
| hsa-miR-1292-3p    | NM_001199138 | NLRC4 | 8.36E-06    | CDS  |
| hsa-miR-1292-3p    | NM_001199138 | NLRC4 | 1.22E-05    | CDS  |
| hsa-miR-1255b-5p   | NM_001199138 | NLRC4 | 0.000407782 | CDS  |
| hsa-miR-1255b-2-3p | NM_001199138 | NLRC4 | 2.79E-05    | CDS  |
| hsa-miR-664a-5p    | NM_001199138 | NLRC4 | 0.06091269  | CDS  |
| hsa-miR-1306-5p    | NM_001199138 | NLRC4 | 1.60E-05    | CDS  |
| hsa-miR-1306-5p    | NM_001199138 | NLRC4 | 4.84E-07    | CDS  |
| hsa-miR-1306-5p    | NM_001199138 | NLRC4 | 6.06E-05    | CDS  |
| hsa-miR-1306-3p    | NM_001199138 | NLRC4 | 1.53E-05    | CDS  |
| hsa-miR-1307-5p    | NM_001199138 | NLRC4 | 6.00E-05    | CDS  |
| hsa-miR-1307-3p    | NM_001199138 | NLRC4 | 3.70E-07    | CDS  |
| hsa-miR-1307-3p    | NM_001199138 | NLRC4 | 0.001218159 | CDS  |
| hsa-miR-1307-3p    | NM_001199138 | NLRC4 | 2.57E-05    | CDS  |
| hsa-miR-513b-3p    | NM_001199138 | NLRC4 | 0.000552817 | CDS  |
| hsa-miR-513b-3p    | NM_001199138 | NLRC4 | 0.000668222 | 5UTR |
| hsa-miR-513c-5p    | NM_001199138 | NLRC4 | 0.01318848  | CDS  |
| hsa-miR-513c-5p    | NM_001199138 | NLRC4 | 3.04E-05    | CDS  |
| hsa-miR-513c-3p    | NM_001199138 | NLRC4 | 0.001300536 | 5UTR |
| hsa-miR-1321       | NM_001199138 | NLRC4 | 4.03E-06    | CDS  |
| hsa-miR-1322       | NM_001199138 | NLRC4 | 0.02853091  | CDS  |
| hsa-miR-1469       | NM_001199138 | NLRC4 | 0.001035763 | CDS  |
| hsa-miR-1469       | NM_001199138 | NLRC4 | 0.01195042  | CDS  |
| hsa-miR-1470       | NM_001199138 | NLRC4 | 7.76E-05    | CDS  |
| hsa-miR-1470       | NM_001199138 | NLRC4 | 2.98E-05    | CDS  |
| hsa-miR-1471       | NM_001199138 | NLRC4 | 0.000159806 | CDS  |
| hsa-miR-1471       | NM_001199138 | NLRC4 | 0.000251763 | CDS  |
| hsa-miR-1471       | NM_001199138 | NLRC4 | 6.96E-05    | CDS  |
| hsa-miR-1538       | NM_001199138 | NLRC4 | 4.84E-07    | CDS  |
| hsa-miR-1538       | NM_001199138 | NLRC4 | 6.98E-06    | CDS  |
| hsa-miR-1538       | NM_001199138 | NLRC4 | 1.46E-05    | CDS  |
| hsa-miR-1539       | NM_001199138 | NLRC4 | 6.33E-06    | CDS  |

|                 |              |       |             |      |
|-----------------|--------------|-------|-------------|------|
| hsa-miR-1539    | NM_001199138 | NLRC4 | 0.00027781  | CDS  |
| hsa-miR-1539    | NM_001199138 | NLRC4 | 4.54E-05    | CDS  |
| hsa-miR-103b    | NM_001199138 | NLRC4 | 4.02E-07    | CDS  |
| hsa-miR-1825    | NM_001199138 | NLRC4 | 0.001188578 | 5UTR |
| hsa-miR-1825    | NM_001199138 | NLRC4 | 0.000477204 | CDS  |
| hsa-miR-1908-5p | NM_001199138 | NLRC4 | 0.0268879   | CDS  |
| hsa-miR-1908-3p | NM_001199138 | NLRC4 | 0.001172201 | CDS  |
| hsa-miR-1908-3p | NM_001199138 | NLRC4 | 5.14E-05    | CDS  |
| hsa-miR-1909-5p | NM_001199138 | NLRC4 | 0.002564212 | CDS  |
| hsa-miR-1909-5p | NM_001199138 | NLRC4 | 0.000285798 | CDS  |
| hsa-miR-1909-3p | NM_001199138 | NLRC4 | 0.006396492 | CDS  |
| hsa-miR-1910-5p | NM_001199138 | NLRC4 | 0.006567177 | CDS  |
| hsa-miR-1910-3p | NM_001199138 | NLRC4 | 0.004462303 | CDS  |
| hsa-miR-1911-5p | NM_001199138 | NLRC4 | 1.88E-05    | CDS  |
| hsa-miR-1911-5p | NM_001199138 | NLRC4 | 0.000379918 | CDS  |
| hsa-miR-1911-3p | NM_001199138 | NLRC4 | 0.001170791 | CDS  |
| hsa-miR-1912-3p | NM_001199138 | NLRC4 | 3.78E-05    | CDS  |
| hsa-miR-1912-3p | NM_001199138 | NLRC4 | 3.70E-07    | CDS  |
| hsa-miR-1913    | NM_001199138 | NLRC4 | 0.01223285  | CDS  |
| hsa-miR-1913    | NM_001199138 | NLRC4 | 0.003672413 | CDS  |
| hsa-miR-1914-3p | NM_001199138 | NLRC4 | 0.001014646 | CDS  |
| hsa-miR-1915-5p | NM_001199138 | NLRC4 | 4.54E-05    | CDS  |
| hsa-miR-1915-5p | NM_001199138 | NLRC4 | 1.82E-06    | CDS  |
| hsa-miR-1915-5p | NM_001199138 | NLRC4 | 0.000326687 | CDS  |
| hsa-miR-1915-3p | NM_001199138 | NLRC4 | 2.23E-07    | CDS  |
| hsa-miR-1915-3p | NM_001199138 | NLRC4 | 1.23E-05    | CDS  |
| hsa-miR-1972    | NM_001199138 | NLRC4 | 0.001447161 | CDS  |
| hsa-miR-1972    | NM_001199138 | NLRC4 | 1.16E-05    | CDS  |
| hsa-miR-1976    | NM_001199138 | NLRC4 | 0.000244245 | CDS  |
| hsa-miR-2110    | NM_001199138 | NLRC4 | 5.56E-06    | CDS  |
| hsa-miR-2110    | NM_001199138 | NLRC4 | 6.26E-05    | CDS  |
| hsa-miR-2114-5p | NM_001199138 | NLRC4 | 0.000239915 | CDS  |
| hsa-miR-2114-5p | NM_001199138 | NLRC4 | 0.001172201 | CDS  |
| hsa-miR-2114-5p | NM_001199138 | NLRC4 | 0.004018656 | CDS  |
| hsa-miR-2114-3p | NM_001199138 | NLRC4 | 7.36E-06    | CDS  |
| hsa-miR-2114-3p | NM_001199138 | NLRC4 | 4.14E-05    | CDS  |
| hsa-miR-2115-5p | NM_001199138 | NLRC4 | 3.88E-05    | CDS  |
| hsa-miR-2115-5p | NM_001199138 | NLRC4 | 0.00015002  | CDS  |
| hsa-miR-2115-3p | NM_001199138 | NLRC4 | 0.01648264  | CDS  |
| hsa-miR-2115-3p | NM_001199138 | NLRC4 | 0.001205514 | CDS  |
| hsa-miR-2116-5p | NM_001199138 | NLRC4 | 4.06E-07    | CDS  |
| hsa-miR-2116-3p | NM_001199138 | NLRC4 | 0.000245493 | CDS  |
| hsa-miR-2117    | NM_001199138 | NLRC4 | 0.000668222 | 5UTR |
| hsa-miR-2276-5p | NM_001199138 | NLRC4 | 8.27E-06    | CDS  |

|                 |              |       |             |     |
|-----------------|--------------|-------|-------------|-----|
| hsa-miR-2276-5p | NM_001199138 | NLRC4 | 7.76E-05    | CDS |
| hsa-miR-2276-3p | NM_001199138 | NLRC4 | 6.54E-06    | CDS |
| hsa-miR-2277-5p | NM_001199138 | NLRC4 | 0.000479692 | CDS |
| hsa-miR-2277-5p | NM_001199138 | NLRC4 | 0.001033441 | CDS |
| hsa-miR-2277-5p | NM_001199138 | NLRC4 | 1.00E-06    | CDS |
| hsa-miR-2277-3p | NM_001199138 | NLRC4 | 1.48E-05    | CDS |
| hsa-miR-2277-3p | NM_001199138 | NLRC4 | 0.000108131 | CDS |
| hsa-miR-2277-3p | NM_001199138 | NLRC4 | 8.09E-06    | CDS |
| hsa-miR-2278    | NM_001199138 | NLRC4 | 0.005224415 | CDS |
| hsa-miR-2681-5p | NM_001199138 | NLRC4 | 0.000239915 | CDS |
| hsa-miR-2681-3p | NM_001199138 | NLRC4 | 0.04156789  | CDS |
| hsa-miR-2682-5p | NM_001199138 | NLRC4 | 0.003518762 | CDS |
| hsa-miR-2682-5p | NM_001199138 | NLRC4 | 9.54E-06    | CDS |
| hsa-miR-2682-3p | NM_001199138 | NLRC4 | 2.92E-05    | CDS |
| hsa-miR-2682-3p | NM_001199138 | NLRC4 | 7.69E-06    | CDS |
| hsa-miR-2682-3p | NM_001199138 | NLRC4 | 4.71E-07    | CDS |
| hsa-miR-2682-3p | NM_001199138 | NLRC4 | 0.000542025 | CDS |
| hsa-miR-711     | NM_001199138 | NLRC4 | 0.000671559 | CDS |
| hsa-miR-711     | NM_001199138 | NLRC4 | 0.000407782 | CDS |
| hsa-miR-718     | NM_001199138 | NLRC4 | 1.21E-05    | CDS |
| hsa-miR-718     | NM_001199138 | NLRC4 | 2.98E-05    | CDS |
| hsa-miR-2861    | NM_001199138 | NLRC4 | 7.19E-05    | CDS |
| hsa-miR-2861    | NM_001199138 | NLRC4 | 0.01176218  | CDS |
| hsa-miR-2861    | NM_001199138 | NLRC4 | 9.02E-05    | CDS |
| hsa-miR-2909    | NM_001199138 | NLRC4 | 0.001027397 | CDS |
| hsa-miR-3117-3p | NM_001199138 | NLRC4 | 0.000281957 | CDS |
| hsa-miR-3119    | NM_001199138 | NLRC4 | 0.00116715  | CDS |
| hsa-miR-3120-5p | NM_001199138 | NLRC4 | 5.86E-06    | CDS |
| hsa-miR-3120-5p | NM_001199138 | NLRC4 | 0.002171061 | CDS |
| hsa-miR-3120-3p | NM_001199138 | NLRC4 | 9.39E-05    | CDS |
| hsa-miR-3121-5p | NM_001199138 | NLRC4 | 2.34E-05    | CDS |
| hsa-miR-3122    | NM_001199138 | NLRC4 | 0.01730902  | CDS |
| hsa-miR-3124-5p | NM_001199138 | NLRC4 | 0.004769708 | CDS |
| hsa-miR-3124-3p | NM_001199138 | NLRC4 | 0.01276016  | CDS |
| hsa-miR-3124-3p | NM_001199138 | NLRC4 | 0.02111429  | CDS |
| hsa-miR-3126-3p | NM_001199138 | NLRC4 | 4.19E-05    | CDS |
| hsa-miR-3126-3p | NM_001199138 | NLRC4 | 1.47E-05    | CDS |
| hsa-miR-3127-5p | NM_001199138 | NLRC4 | 0.006385549 | CDS |
| hsa-miR-3127-3p | NM_001199138 | NLRC4 | 0.006055493 | CDS |
| hsa-miR-3127-3p | NM_001199138 | NLRC4 | 0.000542111 | CDS |
| hsa-miR-3129-5p | NM_001199138 | NLRC4 | 0.01148179  | CDS |
| hsa-miR-3130-5p | NM_001199138 | NLRC4 | 6.15E-05    | CDS |
| hsa-miR-3130-5p | NM_001199138 | NLRC4 | 1.83E-05    | CDS |
| hsa-miR-3130-5p | NM_001199138 | NLRC4 | 8.94E-05    | CDS |

|                  |              |       |             |      |
|------------------|--------------|-------|-------------|------|
| hsa-miR-3130-3p  | NM_001199138 | NLRC4 | 0.0101559   | CDS  |
| hsa-miR-3130-3p  | NM_001199138 | NLRC4 | 7.95E-06    | CDS  |
| hsa-miR-3131     | NM_001199138 | NLRC4 | 0.000598122 | CDS  |
| hsa-miR-3132     | NM_001199138 | NLRC4 | 0.03129093  | CDS  |
| hsa-miR-378b     | NM_001199138 | NLRC4 | 0.02675239  | CDS  |
| hsa-miR-3135a    | NM_001199138 | NLRC4 | 8.94E-05    | CDS  |
| hsa-miR-3135a    | NM_001199138 | NLRC4 | 0.001564598 | CDS  |
| hsa-miR-3136-3p  | NM_001199138 | NLRC4 | 7.76E-05    | CDS  |
| hsa-miR-3136-3p  | NM_001199138 | NLRC4 | 0.00503807  | CDS  |
| hsa-miR-544b     | NM_001199138 | NLRC4 | 8.35E-05    | CDS  |
| hsa-miR-544b     | NM_001199138 | NLRC4 | 8.80E-06    | CDS  |
| hsa-miR-3137     | NM_001199138 | NLRC4 | 5.45E-06    | CDS  |
| hsa-miR-3137     | NM_001199138 | NLRC4 | 0.000150393 | CDS  |
| hsa-miR-3138     | NM_001199138 | NLRC4 | 0.000502803 | CDS  |
| hsa-miR-3138     | NM_001199138 | NLRC4 | 0.003450568 | CDS  |
| hsa-miR-3139     | NM_001199138 | NLRC4 | 9.25E-07    | CDS  |
| hsa-miR-3139     | NM_001199138 | NLRC4 | 4.59E-05    | CDS  |
| hsa-miR-3140-5p  | NM_001199138 | NLRC4 | 0.01801811  | CDS  |
| hsa-miR-3140-3p  | NM_001199138 | NLRC4 | 6.20E-05    | CDS  |
| hsa-miR-3140-3p  | NM_001199138 | NLRC4 | 0.0051834   | CDS  |
| hsa-miR-3140-3p  | NM_001199138 | NLRC4 | 2.88E-05    | CDS  |
| hsa-miR-3141     | NM_001199138 | NLRC4 | 0.000671559 | CDS  |
| hsa-miR-3141     | NM_001199138 | NLRC4 | 0.000605168 | CDS  |
| hsa-miR-3141     | NM_001199138 | NLRC4 | 0.000642323 | CDS  |
| hsa-miR-3144-5p  | NM_001199138 | NLRC4 | 0.005514936 | CDS  |
| hsa-miR-3144-5p  | NM_001199138 | NLRC4 | 0.002762722 | 5UTR |
| hsa-miR-3147     | NM_001199138 | NLRC4 | 0.1399983   | CDS  |
| hsa-miR-3147     | NM_001199138 | NLRC4 | 0.01054983  | CDS  |
| hsa-miR-3147     | NM_001199138 | NLRC4 | 1.00E-06    | CDS  |
| hsa-miR-3147     | NM_001199138 | NLRC4 | 4.47E-06    | CDS  |
| hsa-miR-3148     | NM_001199138 | NLRC4 | 6.98E-06    | CDS  |
| hsa-miR-3148     | NM_001199138 | NLRC4 | 0.03211739  | CDS  |
| hsa-miR-3150a-3p | NM_001199138 | NLRC4 | 1.24E-05    | CDS  |
| hsa-miR-3150a-3p | NM_001199138 | NLRC4 | 4.74E-06    | CDS  |
| hsa-miR-3151-5p  | NM_001199138 | NLRC4 | 0.01438959  | 5UTR |
| hsa-miR-3151-5p  | NM_001199138 | NLRC4 | 0.04004941  | CDS  |
| hsa-miR-3152-3p  | NM_001199138 | NLRC4 | 0.01289354  | CDS  |
| hsa-miR-3153     | NM_001199138 | NLRC4 | 0.000605168 | CDS  |
| hsa-miR-3074-5p  | NM_001199138 | NLRC4 | 0.01928178  | CDS  |
| hsa-miR-3154     | NM_001199138 | NLRC4 | 0.000956925 | CDS  |
| hsa-miR-3154     | NM_001199138 | NLRC4 | 0.01542657  | CDS  |
| hsa-miR-3155a    | NM_001199138 | NLRC4 | 6.15E-05    | CDS  |
| hsa-miR-3156-3p  | NM_001199138 | NLRC4 | 2.98E-05    | CDS  |
| hsa-miR-3156-3p  | NM_001199138 | NLRC4 | 0.002940157 | CDS  |

|                 |              |       |             |      |
|-----------------|--------------|-------|-------------|------|
| hsa-miR-3157-5p | NM_001199138 | NLRC4 | 1.56E-05    | CDS  |
| hsa-miR-3157-3p | NM_001199138 | NLRC4 | 4.84E-07    | CDS  |
| hsa-miR-3157-3p | NM_001199138 | NLRC4 | 8.27E-06    | CDS  |
| hsa-miR-3157-3p | NM_001199138 | NLRC4 | 0.000140506 | CDS  |
| hsa-miR-3158-5p | NM_001199138 | NLRC4 | 7.28E-05    | CDS  |
| hsa-miR-3158-5p | NM_001199138 | NLRC4 | 6.97E-06    | CDS  |
| hsa-miR-3158-3p | NM_001199138 | NLRC4 | 4.47E-06    | CDS  |
| hsa-miR-3158-3p | NM_001199138 | NLRC4 | 0.002580033 | CDS  |
| hsa-miR-3158-3p | NM_001199138 | NLRC4 | 1.24E-05    | CDS  |
| hsa-miR-3159    | NM_001199138 | NLRC4 | 0.01001738  | CDS  |
| hsa-miR-3160-5p | NM_001199138 | NLRC4 | 1.47E-05    | CDS  |
| hsa-miR-3160-5p | NM_001199138 | NLRC4 | 0.000646339 | CDS  |
| hsa-miR-3160-5p | NM_001199138 | NLRC4 | 0.002426029 | CDS  |
| hsa-miR-3161    | NM_001199138 | NLRC4 | 0.000785087 | CDS  |
| hsa-miR-3162-5p | NM_001199138 | NLRC4 | 0.1988711   | CDS  |
| hsa-miR-3162-5p | NM_001199138 | NLRC4 | 0.01459592  | CDS  |
| hsa-miR-3163    | NM_001199138 | NLRC4 | 0.009993837 | CDS  |
| hsa-miR-3164    | NM_001199138 | NLRC4 | 0.04495882  | CDS  |
| hsa-miR-3165    | NM_001199138 | NLRC4 | 0.05016788  | CDS  |
| hsa-miR-3165    | NM_001199138 | NLRC4 | 0.003523479 | 5UTR |
| hsa-miR-3165    | NM_001199138 | NLRC4 | 0.01194815  | CDS  |
| hsa-miR-3169    | NM_001199138 | NLRC4 | 7.06E-05    | CDS  |
| hsa-miR-3170    | NM_001199138 | NLRC4 | 1.46E-05    | CDS  |
| hsa-miR-3173-5p | NM_001199138 | NLRC4 | 0.004730357 | CDS  |
| hsa-miR-3173-5p | NM_001199138 | NLRC4 | 0.03271231  | CDS  |
| hsa-miR-3173-3p | NM_001199138 | NLRC4 | 0.00180674  | CDS  |
| hsa-miR-3173-3p | NM_001199138 | NLRC4 | 3.78E-05    | CDS  |
| hsa-miR-1193    | NM_001199138 | NLRC4 | 0.000276588 | 5UTR |
| hsa-miR-1193    | NM_001199138 | NLRC4 | 0.005224415 | CDS  |
| hsa-miR-323b-5p | NM_001199138 | NLRC4 | 0.02250464  | CDS  |
| hsa-miR-3174    | NM_001199138 | NLRC4 | 0.000365711 | CDS  |
| hsa-miR-3175    | NM_001199138 | NLRC4 | 8.64E-05    | CDS  |
| hsa-miR-3175    | NM_001199138 | NLRC4 | 0.000956925 | CDS  |
| hsa-miR-3176    | NM_001199138 | NLRC4 | 0.01623033  | CDS  |
| hsa-miR-3177-3p | NM_001199138 | NLRC4 | 2.82E-07    | CDS  |
| hsa-miR-3177-3p | NM_001199138 | NLRC4 | 0.001670142 | CDS  |
| hsa-miR-3178    | NM_001199138 | NLRC4 | 0.003639629 | CDS  |
| hsa-miR-3180-5p | NM_001199138 | NLRC4 | 1.21E-05    | CDS  |
| hsa-miR-3180-5p | NM_001199138 | NLRC4 | 5.25E-05    | CDS  |
| hsa-miR-3180-3p | NM_001199138 | NLRC4 | 0.002815688 | CDS  |
| hsa-miR-548w    | NM_001199138 | NLRC4 | 0.006712235 | CDS  |
| hsa-miR-3181    | NM_001199138 | NLRC4 | 6.65E-06    | CDS  |
| hsa-miR-3183    | NM_001199138 | NLRC4 | 2.59E-05    | CDS  |
| hsa-miR-3184-5p | NM_001199138 | NLRC4 | 2.28E-05    | CDS  |

|                 |              |       |             |      |
|-----------------|--------------|-------|-------------|------|
| hsa-miR-3184-5p | NM_001199138 | NLRC4 | 0.01630598  | 5UTR |
| hsa-miR-3184-5p | NM_001199138 | NLRC4 | 3.48E-05    | CDS  |
| hsa-miR-3184-3p | NM_001199138 | NLRC4 | 0.001050863 | CDS  |
| hsa-miR-3184-3p | NM_001199138 | NLRC4 | 0.00037471  | CDS  |
| hsa-miR-3184-3p | NM_001199138 | NLRC4 | 0.000137416 | CDS  |
| hsa-miR-3185    | NM_001199138 | NLRC4 | 0.01250097  | CDS  |
| hsa-miR-3185    | NM_001199138 | NLRC4 | 2.11E-05    | CDS  |
| hsa-miR-3065-5p | NM_001199138 | NLRC4 | 0.004879862 | CDS  |
| hsa-miR-3065-3p | NM_001199138 | NLRC4 | 0.01519719  | CDS  |
| hsa-miR-3065-3p | NM_001199138 | NLRC4 | 1.19E-05    | CDS  |
| hsa-miR-3065-3p | NM_001199138 | NLRC4 | 1.07E-05    | CDS  |
| hsa-miR-3186-5p | NM_001199138 | NLRC4 | 0.000441636 | CDS  |
| hsa-miR-3186-3p | NM_001199138 | NLRC4 | 0.001972862 | CDS  |
| hsa-miR-3186-3p | NM_001199138 | NLRC4 | 0.006569541 | CDS  |
| hsa-miR-3186-3p | NM_001199138 | NLRC4 | 0.005620409 | CDS  |
| hsa-miR-3187-5p | NM_001199138 | NLRC4 | 3.70E-07    | CDS  |
| hsa-miR-3187-3p | NM_001199138 | NLRC4 | 0.001503355 | CDS  |
| hsa-miR-3187-3p | NM_001199138 | NLRC4 | 0.01732928  | CDS  |
| hsa-miR-3188    | NM_001199138 | NLRC4 | 5.97E-06    | CDS  |
| hsa-miR-3188    | NM_001199138 | NLRC4 | 0.01630598  | 5UTR |
| hsa-miR-3188    | NM_001199138 | NLRC4 | 0.000926972 | CDS  |
| hsa-miR-3189-5p | NM_001199138 | NLRC4 | 0.000159806 | CDS  |
| hsa-miR-3189-3p | NM_001199138 | NLRC4 | 7.16E-06    | CDS  |
| hsa-miR-3189-3p | NM_001199138 | NLRC4 | 2.06E-05    | CDS  |
| hsa-miR-3190-5p | NM_001199138 | NLRC4 | 0.06961787  | CDS  |
| hsa-miR-3190-5p | NM_001199138 | NLRC4 | 5.56E-06    | CDS  |
| hsa-miR-3190-3p | NM_001199138 | NLRC4 | 0.001218159 | CDS  |
| hsa-miR-3190-3p | NM_001199138 | NLRC4 | 0.08798883  | CDS  |
| hsa-miR-3191-5p | NM_001199138 | NLRC4 | 0.000225565 | CDS  |
| hsa-miR-3191-3p | NM_001199138 | NLRC4 | 0.01247752  | CDS  |
| hsa-miR-3192-5p | NM_001199138 | NLRC4 | 1.23E-05    | CDS  |
| hsa-miR-3192-5p | NM_001199138 | NLRC4 | 0.00210636  | CDS  |
| hsa-miR-3192-5p | NM_001199138 | NLRC4 | 0.006869599 | CDS  |
| hsa-miR-3192-3p | NM_001199138 | NLRC4 | 0.01223285  | CDS  |
| hsa-miR-3192-3p | NM_001199138 | NLRC4 | 6.65E-06    | CDS  |
| hsa-miR-3192-3p | NM_001199138 | NLRC4 | 2.94E-05    | CDS  |
| hsa-miR-3193    | NM_001199138 | NLRC4 | 0.006055493 | CDS  |
| hsa-miR-3193    | NM_001199138 | NLRC4 | 0.008213843 | CDS  |
| hsa-miR-3194-5p | NM_001199138 | NLRC4 | 7.51E-05    | CDS  |
| hsa-miR-3194-5p | NM_001199138 | NLRC4 | 4.06E-07    | CDS  |
| hsa-miR-3194-3p | NM_001199138 | NLRC4 | 2.94E-05    | CDS  |
| hsa-miR-3194-3p | NM_001199138 | NLRC4 | 7.76E-05    | CDS  |
| hsa-miR-3195    | NM_001199138 | NLRC4 | 6.05E-07    | CDS  |
| hsa-miR-3196    | NM_001199138 | NLRC4 | 3.17E-07    | CDS  |



|                 |              |       |             |      |
|-----------------|--------------|-------|-------------|------|
| hsa-miR-3196    | NM_001199138 | NLRC4 | 6.00E-06    | CDS  |
| hsa-miR-3197    | NM_001199138 | NLRC4 | 0.000161338 | CDS  |
| hsa-miR-3197    | NM_001199138 | NLRC4 | 0.001135043 | CDS  |
| hsa-miR-3198    | NM_001199138 | NLRC4 | 9.56E-06    | CDS  |
| hsa-miR-3198    | NM_001199138 | NLRC4 | 5.03E-05    | CDS  |
| hsa-miR-3198    | NM_001199138 | NLRC4 | 0.000297589 | CDS  |
| hsa-miR-3200-5p | NM_001199138 | NLRC4 | 0.006869599 | CDS  |
| hsa-miR-3200-3p | NM_001199138 | NLRC4 | 4.54E-05    | CDS  |
| hsa-miR-514b-5p | NM_001199138 | NLRC4 | 3.04E-05    | CDS  |
| hsa-miR-514b-5p | NM_001199138 | NLRC4 | 0.01318848  | CDS  |
| hsa-miR-3202    | NM_001199138 | NLRC4 | 0.000626821 | CDS  |
| hsa-miR-3202    | NM_001199138 | NLRC4 | 0.02468582  | CDS  |
| hsa-miR-3202    | NM_001199138 | NLRC4 | 0.05383761  | CDS  |
| hsa-miR-4296    | NM_001199138 | NLRC4 | 0.000248928 | CDS  |
| hsa-miR-4296    | NM_001199138 | NLRC4 | 0.005126806 | CDS  |
| hsa-miR-378c    | NM_001199138 | NLRC4 | 0.000228869 | CDS  |
| hsa-miR-4293    | NM_001199138 | NLRC4 | 1.05E-05    | CDS  |
| hsa-miR-4294    | NM_001199138 | NLRC4 | 0.001633284 | CDS  |
| hsa-miR-4299    | NM_001199138 | NLRC4 | 0.01623033  | CDS  |
| hsa-miR-4299    | NM_001199138 | NLRC4 | 4.36E-05    | CDS  |
| hsa-miR-4298    | NM_001199138 | NLRC4 | 0.02675239  | CDS  |
| hsa-miR-4298    | NM_001199138 | NLRC4 | 0.000502803 | CDS  |
| hsa-miR-4304    | NM_001199138 | NLRC4 | 4.54E-05    | CDS  |
| hsa-miR-4304    | NM_001199138 | NLRC4 | 0.0294755   | CDS  |
| hsa-miR-4304    | NM_001199138 | NLRC4 | 4.98E-06    | CDS  |
| hsa-miR-4304    | NM_001199138 | NLRC4 | 1.33E-07    | CDS  |
| hsa-miR-4302    | NM_001199138 | NLRC4 | 0.000778346 | CDS  |
| hsa-miR-4303    | NM_001199138 | NLRC4 | 0.08531005  | CDS  |
| hsa-miR-4303    | NM_001199138 | NLRC4 | 0.001027397 | CDS  |
| hsa-miR-4303    | NM_001199138 | NLRC4 | 0.02562117  | 5UTR |
| hsa-miR-4306    | NM_001199138 | NLRC4 | 0.02468582  | CDS  |
| hsa-miR-4309    | NM_001199138 | NLRC4 | 0.00013214  | CDS  |
| hsa-miR-4309    | NM_001199138 | NLRC4 | 1.16E-05    | CDS  |
| hsa-miR-4308    | NM_001199138 | NLRC4 | 0.003473051 | CDS  |
| hsa-miR-4308    | NM_001199138 | NLRC4 | 0.001218159 | CDS  |
| hsa-miR-4310    | NM_001199138 | NLRC4 | 6.41E-06    | CDS  |
| hsa-miR-4311    | NM_001199138 | NLRC4 | 0.03337992  | CDS  |
| hsa-miR-4311    | NM_001199138 | NLRC4 | 0.000654256 | CDS  |
| hsa-miR-4312    | NM_001199138 | NLRC4 | 0.00037471  | CDS  |
| hsa-miR-4312    | NM_001199138 | NLRC4 | 0.000646339 | CDS  |
| hsa-miR-4312    | NM_001199138 | NLRC4 | 0.000125663 | CDS  |
| hsa-miR-4313    | NM_001199138 | NLRC4 | 1.60E-06    | CDS  |
| hsa-miR-4315    | NM_001199138 | NLRC4 | 0.000582754 | CDS  |
| hsa-miR-4315    | NM_001199138 | NLRC4 | 0.002083594 | CDS  |

|                 |              |       |             |      |
|-----------------|--------------|-------|-------------|------|
| hsa-miR-4316    | NM_001199138 | NLRC4 | 0.009044755 | CDS  |
| hsa-miR-4316    | NM_001199138 | NLRC4 | 3.99E-05    | CDS  |
| hsa-miR-4314    | NM_001199138 | NLRC4 | 0.001185525 | CDS  |
| hsa-miR-4318    | NM_001199138 | NLRC4 | 0.04671732  | CDS  |
| hsa-miR-4320    | NM_001199138 | NLRC4 | 0.002224226 | CDS  |
| hsa-miR-4320    | NM_001199138 | NLRC4 | 1.86E-05    | CDS  |
| hsa-miR-4322    | NM_001199138 | NLRC4 | 1.85E-06    | CDS  |
| hsa-miR-4322    | NM_001199138 | NLRC4 | 7.16E-06    | CDS  |
| hsa-miR-4322    | NM_001199138 | NLRC4 | 4.98E-06    | CDS  |
| hsa-miR-4322    | NM_001199138 | NLRC4 | 2.98E-05    | CDS  |
| hsa-miR-4321    | NM_001199138 | NLRC4 | 6.67E-05    | CDS  |
| hsa-miR-4321    | NM_001199138 | NLRC4 | 0.004898831 | CDS  |
| hsa-miR-4257    | NM_001199138 | NLRC4 | 0.009044755 | CDS  |
| hsa-miR-4259    | NM_001199138 | NLRC4 | 0.000956925 | CDS  |
| hsa-miR-4259    | NM_001199138 | NLRC4 | 0.000953849 | CDS  |
| hsa-miR-4259    | NM_001199138 | NLRC4 | 0.08150963  | CDS  |
| hsa-miR-4260    | NM_001199138 | NLRC4 | 0.000158814 | CDS  |
| hsa-miR-4260    | NM_001199138 | NLRC4 | 0.03847363  | CDS  |
| hsa-miR-4253    | NM_001199138 | NLRC4 | 0.004123571 | CDS  |
| hsa-miR-4251    | NM_001199138 | NLRC4 | 0.004958121 | CDS  |
| hsa-miR-4254    | NM_001199138 | NLRC4 | 1.35E-05    | CDS  |
| hsa-miR-4254    | NM_001199138 | NLRC4 | 0.000146875 | CDS  |
| hsa-miR-4252    | NM_001199138 | NLRC4 | 0.003190413 | CDS  |
| hsa-miR-4326    | NM_001199138 | NLRC4 | 0.00111785  | CDS  |
| hsa-miR-4327    | NM_001199138 | NLRC4 | 2.04E-05    | CDS  |
| hsa-miR-4327    | NM_001199138 | NLRC4 | 2.03E-05    | 5UTR |
| hsa-miR-4327    | NM_001199138 | NLRC4 | 1.05E-05    | CDS  |
| hsa-miR-4265    | NM_001199138 | NLRC4 | 4.48E-05    | CDS  |
| hsa-miR-4265    | NM_001199138 | NLRC4 | 6.75E-07    | CDS  |
| hsa-miR-4265    | NM_001199138 | NLRC4 | 0.2724825   | CDS  |
| hsa-miR-4266    | NM_001199138 | NLRC4 | 4.74E-06    | CDS  |
| hsa-miR-4266    | NM_001199138 | NLRC4 | 0.01534616  | 5UTR |
| hsa-miR-4262    | NM_001199138 | NLRC4 | 6.67E-05    | CDS  |
| hsa-miR-2355-5p | NM_001199138 | NLRC4 | 0.001180368 | CDS  |
| hsa-miR-2355-3p | NM_001199138 | NLRC4 | 0.01626591  | CDS  |
| hsa-miR-2355-3p | NM_001199138 | NLRC4 | 0.004394371 | 5UTR |
| hsa-miR-4268    | NM_001199138 | NLRC4 | 4.47E-06    | CDS  |
| hsa-miR-4269    | NM_001199138 | NLRC4 | 0.002426029 | CDS  |
| hsa-miR-4269    | NM_001199138 | NLRC4 | 0.000293001 | CDS  |
| hsa-miR-4269    | NM_001199138 | NLRC4 | 1.54E-05    | CDS  |
| hsa-miR-4270    | NM_001199138 | NLRC4 | 0.004035133 | CDS  |
| hsa-miR-4271    | NM_001199138 | NLRC4 | 0.1988711   | CDS  |
| hsa-miR-4274    | NM_001199138 | NLRC4 | 8.09E-06    | CDS  |
| hsa-miR-4274    | NM_001199138 | NLRC4 | 1.04E-05    | 5UTR |

|                 |              |       |             |      |
|-----------------|--------------|-------|-------------|------|
| hsa-miR-4281    | NM_001199138 | NLRC4 | 0.000671559 | CDS  |
| hsa-miR-4281    | NM_001199138 | NLRC4 | 0.01001738  | CDS  |
| hsa-miR-4281    | NM_001199138 | NLRC4 | 4.59E-05    | CDS  |
| hsa-miR-4279    | NM_001199138 | NLRC4 | 1.08E-05    | CDS  |
| hsa-miR-4278    | NM_001199138 | NLRC4 | 0.03498518  | CDS  |
| hsa-miR-4278    | NM_001199138 | NLRC4 | 0.04749199  | CDS  |
| hsa-miR-4280    | NM_001199138 | NLRC4 | 0.000150393 | CDS  |
| hsa-miR-4283    | NM_001199138 | NLRC4 | 0.000671559 | CDS  |
| hsa-miR-4287    | NM_001199138 | NLRC4 | 0.000268253 | CDS  |
| hsa-miR-4287    | NM_001199138 | NLRC4 | 0.000106281 | CDS  |
| hsa-miR-4288    | NM_001199138 | NLRC4 | 0.007958347 | CDS  |
| hsa-miR-4288    | NM_001199138 | NLRC4 | 0.001120008 | CDS  |
| hsa-miR-4292    | NM_001199138 | NLRC4 | 7.16E-06    | CDS  |
| hsa-miR-4289    | NM_001199138 | NLRC4 | 7.01E-06    | CDS  |
| hsa-miR-4289    | NM_001199138 | NLRC4 | 0.001204086 | CDS  |
| hsa-miR-4291    | NM_001199138 | NLRC4 | 0.00175646  | CDS  |
| hsa-miR-4291    | NM_001199138 | NLRC4 | 1.19E-05    | CDS  |
| hsa-miR-4330    | NM_001199138 | NLRC4 | 0.002444199 | CDS  |
| hsa-miR-4330    | NM_001199138 | NLRC4 | 0.00998864  | 5UTR |
| hsa-miR-500b-5p | NM_001199138 | NLRC4 | 0.009867866 | CDS  |
| hsa-miR-500b-3p | NM_001199138 | NLRC4 | 0.000201083 | CDS  |
| hsa-miR-500b-3p | NM_001199138 | NLRC4 | 4.19E-05    | CDS  |
| hsa-miR-4328    | NM_001199138 | NLRC4 | 0.0002172   | CDS  |
| hsa-miR-3605-3p | NM_001199138 | NLRC4 | 0.000612062 | CDS  |
| hsa-miR-3612    | NM_001199138 | NLRC4 | 4.35E-05    | CDS  |
| hsa-miR-3612    | NM_001199138 | NLRC4 | 6.66E-06    | CDS  |
| hsa-miR-3613-5p | NM_001199138 | NLRC4 | 0.1294986   | 5UTR |
| hsa-miR-3614-5p | NM_001199138 | NLRC4 | 0.006567177 | CDS  |
| hsa-miR-3614-3p | NM_001199138 | NLRC4 | 0.00015002  | CDS  |
| hsa-miR-3615    | NM_001199138 | NLRC4 | 0.000583201 | CDS  |
| hsa-miR-3615    | NM_001199138 | NLRC4 | 7.91E-05    | CDS  |
| hsa-miR-3615    | NM_001199138 | NLRC4 | 6.75E-07    | CDS  |
| hsa-miR-3616-5p | NM_001199138 | NLRC4 | 0.01648264  | CDS  |
| hsa-miR-3616-3p | NM_001199138 | NLRC4 | 0.000326334 | CDS  |
| hsa-miR-3616-3p | NM_001199138 | NLRC4 | 0.000384216 | CDS  |
| hsa-miR-3617-3p | NM_001199138 | NLRC4 | 7.30E-05    | CDS  |
| hsa-miR-3619-5p | NM_001199138 | NLRC4 | 0.003455527 | CDS  |
| hsa-miR-3619-3p | NM_001199138 | NLRC4 | 0.008415762 | CDS  |
| hsa-miR-3619-3p | NM_001199138 | NLRC4 | 0.00303577  | CDS  |
| hsa-miR-23c     | NM_001199138 | NLRC4 | 0.000107543 | CDS  |
| hsa-miR-3620-5p | NM_001199138 | NLRC4 | 0.000133333 | CDS  |
| hsa-miR-3620-5p | NM_001199138 | NLRC4 | 0.005514936 | CDS  |
| hsa-miR-3620-5p | NM_001199138 | NLRC4 | 0.01465807  | CDS  |
| hsa-miR-3620-3p | NM_001199138 | NLRC4 | 4.84E-07    | CDS  |

|                  |              |       |             |      |
|------------------|--------------|-------|-------------|------|
| hsa-miR-3621     | NM_001199138 | NLRC4 | 1.85E-05    | CDS  |
| hsa-miR-3621     | NM_001199138 | NLRC4 | 1.39E-05    | CDS  |
| hsa-miR-3621     | NM_001199138 | NLRC4 | 0.002757795 | CDS  |
| hsa-miR-3622a-5p | NM_001199138 | NLRC4 | 0.00091255  | CDS  |
| hsa-miR-3622b-5p | NM_001199138 | NLRC4 | 0.003824517 | CDS  |
| hsa-miR-3622b-5p | NM_001199138 | NLRC4 | 0.01218382  | CDS  |
| hsa-miR-3622b-5p | NM_001199138 | NLRC4 | 0.001200807 | 5UTR |
| hsa-miR-3648     | NM_001199138 | NLRC4 | 1.05E-05    | CDS  |
| hsa-miR-3648     | NM_001199138 | NLRC4 | 0.001037091 | CDS  |
| hsa-miR-3649     | NM_001199138 | NLRC4 | 0.05611306  | CDS  |
| hsa-miR-3650     | NM_001199138 | NLRC4 | 3.82E-05    | CDS  |
| hsa-miR-3650     | NM_001199138 | NLRC4 | 0.01182994  | CDS  |
| hsa-miR-3651     | NM_001199138 | NLRC4 | 4.24E-05    | CDS  |
| hsa-miR-3651     | NM_001199138 | NLRC4 | 0.000170659 | CDS  |
| hsa-miR-3652     | NM_001199138 | NLRC4 | 0.001567866 | CDS  |
| hsa-miR-3652     | NM_001199138 | NLRC4 | 4.41E-05    | CDS  |
| hsa-miR-3654     | NM_001199138 | NLRC4 | 0.000897224 | CDS  |
| hsa-miR-3654     | NM_001199138 | NLRC4 | 0.004462303 | CDS  |
| hsa-miR-3655     | NM_001199138 | NLRC4 | 4.97E-05    | CDS  |
| hsa-miR-3661     | NM_001199138 | NLRC4 | 5.54E-06    | CDS  |
| hsa-miR-3663-5p  | NM_001199138 | NLRC4 | 0.000999579 | CDS  |
| hsa-miR-3663-3p  | NM_001199138 | NLRC4 | 0.000331211 | CDS  |
| hsa-miR-3664-3p  | NM_001199138 | NLRC4 | 0.01479238  | CDS  |
| hsa-miR-3665     | NM_001199138 | NLRC4 | 1.14E-07    | CDS  |
| hsa-miR-3665     | NM_001199138 | NLRC4 | 9.79E-05    | CDS  |
| hsa-miR-3665     | NM_001199138 | NLRC4 | 0.00107409  | CDS  |
| hsa-miR-3667-3p  | NM_001199138 | NLRC4 | 0.000120074 | CDS  |
| hsa-miR-3670     | NM_001199138 | NLRC4 | 3.68E-05    | CDS  |
| hsa-miR-3675-5p  | NM_001199138 | NLRC4 | 5.49E-05    | CDS  |
| hsa-miR-3675-5p  | NM_001199138 | NLRC4 | 3.17E-07    | CDS  |
| hsa-miR-3675-5p  | NM_001199138 | NLRC4 | 0.003560324 | CDS  |
| hsa-miR-3675-5p  | NM_001199138 | NLRC4 | 4.66E-05    | CDS  |
| hsa-miR-3677-5p  | NM_001199138 | NLRC4 | 2.65E-05    | CDS  |
| hsa-miR-3677-5p  | NM_001199138 | NLRC4 | 0.000153631 | CDS  |
| hsa-miR-3677-5p  | NM_001199138 | NLRC4 | 9.25E-07    | CDS  |
| hsa-miR-3677-3p  | NM_001199138 | NLRC4 | 7.16E-06    | CDS  |
| hsa-miR-3677-3p  | NM_001199138 | NLRC4 | 5.85E-06    | CDS  |
| hsa-miR-3678-3p  | NM_001199138 | NLRC4 | 0.001727314 | CDS  |
| hsa-miR-3678-3p  | NM_001199138 | NLRC4 | 4.41E-05    | CDS  |
| hsa-miR-3679-5p  | NM_001199138 | NLRC4 | 0.001275108 | CDS  |
| hsa-miR-3679-5p  | NM_001199138 | NLRC4 | 0.000235798 | CDS  |
| hsa-miR-3680-5p  | NM_001199138 | NLRC4 | 0.000286363 | CDS  |
| hsa-miR-3680-5p  | NM_001199138 | NLRC4 | 0.000159806 | CDS  |
| hsa-miR-3680-3p  | NM_001199138 | NLRC4 | 4.78E-05    | CDS  |

|                  |              |       |             |     |
|------------------|--------------|-------|-------------|-----|
| hsa-miR-3680-3p  | NM_001199138 | NLRC4 | 4.54E-05    | CDS |
| hsa-miR-3680-3p  | NM_001199138 | NLRC4 | 0.000317398 | CDS |
| hsa-miR-3681-5p  | NM_001199138 | NLRC4 | 0.000620765 | CDS |
| hsa-miR-3681-5p  | NM_001199138 | NLRC4 | 0.001561663 | CDS |
| hsa-miR-3681-5p  | NM_001199138 | NLRC4 | 0.01718499  | CDS |
| hsa-miR-3681-3p  | NM_001199138 | NLRC4 | 1.60E-07    | CDS |
| hsa-miR-3682-5p  | NM_001199138 | NLRC4 | 0.0037024   | CDS |
| hsa-miR-3682-3p  | NM_001199138 | NLRC4 | 0.000988815 | CDS |
| hsa-miR-3682-3p  | NM_001199138 | NLRC4 | 0.000331211 | CDS |
| hsa-miR-3688-3p  | NM_001199138 | NLRC4 | 0.001999086 | CDS |
| hsa-miR-3689a-5p | NM_001199138 | NLRC4 | 8.91E-06    | CDS |
| hsa-miR-3689a-5p | NM_001199138 | NLRC4 | 0.000169476 | CDS |
| hsa-miR-3689a-5p | NM_001199138 | NLRC4 | 0.000123515 | CDS |
| hsa-miR-3689a-3p | NM_001199138 | NLRC4 | 4.48E-05    | CDS |
| hsa-miR-3689a-3p | NM_001199138 | NLRC4 | 0.001218159 | CDS |
| hsa-miR-3691-5p  | NM_001199138 | NLRC4 | 0.01189954  | CDS |
| hsa-miR-3691-5p  | NM_001199138 | NLRC4 | 0.04158218  | CDS |
| hsa-miR-3692-5p  | NM_001199138 | NLRC4 | 0.01149959  | CDS |
| hsa-miR-3692-5p  | NM_001199138 | NLRC4 | 0.001445108 | CDS |
| hsa-miR-3692-5p  | NM_001199138 | NLRC4 | 0.000649339 | CDS |
| hsa-miR-3692-3p  | NM_001199138 | NLRC4 | 4.78E-05    | CDS |
| hsa-miR-3714     | NM_001199138 | NLRC4 | 7.45E-06    | CDS |
| hsa-miR-3714     | NM_001199138 | NLRC4 | 1.86E-05    | CDS |
| hsa-miR-3180     | NM_001199138 | NLRC4 | 0.002815688 | CDS |
| hsa-miR-3180     | NM_001199138 | NLRC4 | 4.95E-07    | CDS |
| hsa-miR-3180     | NM_001199138 | NLRC4 | 0.000135949 | CDS |
| hsa-miR-3907     | NM_001199138 | NLRC4 | 0.000294775 | CDS |
| hsa-miR-3689b-5p | NM_001199138 | NLRC4 | 8.91E-06    | CDS |
| hsa-miR-3689b-5p | NM_001199138 | NLRC4 | 0.000169476 | CDS |
| hsa-miR-3689b-5p | NM_001199138 | NLRC4 | 0.000123515 | CDS |
| hsa-miR-3908     | NM_001199138 | NLRC4 | 0.006459822 | CDS |
| hsa-miR-3909     | NM_001199138 | NLRC4 | 0.006055493 | CDS |
| hsa-miR-3909     | NM_001199138 | NLRC4 | 9.61E-05    | CDS |
| hsa-miR-3911     | NM_001199138 | NLRC4 | 6.19E-05    | CDS |
| hsa-miR-3911     | NM_001199138 | NLRC4 | 0.004588791 | CDS |
| hsa-miR-3911     | NM_001199138 | NLRC4 | 0.000799382 | CDS |
| hsa-miR-3911     | NM_001199138 | NLRC4 | 5.45E-06    | CDS |
| hsa-miR-3913-5p  | NM_001199138 | NLRC4 | 0.000592353 | CDS |
| hsa-miR-3917     | NM_001199138 | NLRC4 | 0.001031207 | CDS |
| hsa-miR-3918     | NM_001199138 | NLRC4 | 0.002435779 | CDS |
| hsa-miR-3918     | NM_001199138 | NLRC4 | 0.000671559 | CDS |
| hsa-miR-3919     | NM_001199138 | NLRC4 | 0.001088706 | CDS |
| hsa-miR-3150b-5p | NM_001199138 | NLRC4 | 6.18E-05    | CDS |
| hsa-miR-3150b-3p | NM_001199138 | NLRC4 | 0.04142576  | CDS |

|                   |              |       |             |      |
|-------------------|--------------|-------|-------------|------|
| hsa-miR-3150b-3p  | NM_001199138 | NLRC4 | 0.005581299 | CDS  |
| hsa-miR-3921      | NM_001199138 | NLRC4 | 2.19E-05    | 5UTR |
| hsa-miR-3922-5p   | NM_001199138 | NLRC4 | 1.16E-05    | CDS  |
| hsa-miR-3922-3p   | NM_001199138 | NLRC4 | 8.80E-06    | CDS  |
| hsa-miR-3922-3p   | NM_001199138 | NLRC4 | 0.01233873  | 5UTR |
| hsa-miR-3923      | NM_001199138 | NLRC4 | 0.000498853 | CDS  |
| hsa-miR-3925-5p   | NM_001199138 | NLRC4 | 0.004592381 | CDS  |
| hsa-miR-3925-3p   | NM_001199138 | NLRC4 | 3.98E-05    | CDS  |
| hsa-miR-3927-5p   | NM_001199138 | NLRC4 | 2.83E-05    | CDS  |
| hsa-miR-3927-3p   | NM_001199138 | NLRC4 | 0.01804454  | CDS  |
| hsa-miR-3928-5p   | NM_001199138 | NLRC4 | 5.34E-05    | CDS  |
| hsa-miR-3928-5p   | NM_001199138 | NLRC4 | 2.13E-05    | CDS  |
| hsa-miR-3928-3p   | NM_001199138 | NLRC4 | 8.82E-05    | CDS  |
| hsa-miR-3928-3p   | NM_001199138 | NLRC4 | 0.05553747  | CDS  |
| hsa-miR-3929      | NM_001199138 | NLRC4 | 0.01630598  | 5UTR |
| hsa-miR-3929      | NM_001199138 | NLRC4 | 1.44E-05    | CDS  |
| hsa-miR-3929      | NM_001199138 | NLRC4 | 0.000598122 | CDS  |
| hsa-miR-3934-5p   | NM_001199138 | NLRC4 | 0.001023348 | CDS  |
| hsa-miR-3934-3p   | NM_001199138 | NLRC4 | 1.68E-06    | CDS  |
| hsa-miR-3935      | NM_001199138 | NLRC4 | 0.01247752  | CDS  |
| hsa-miR-3936      | NM_001199138 | NLRC4 | 0.000598122 | CDS  |
| hsa-miR-3936      | NM_001199138 | NLRC4 | 9.79E-05    | CDS  |
| hsa-miR-3936      | NM_001199138 | NLRC4 | 4.59E-05    | CDS  |
| hsa-miR-3937      | NM_001199138 | NLRC4 | 4.56E-05    | CDS  |
| hsa-miR-3937      | NM_001199138 | NLRC4 | 0.000441636 | CDS  |
| hsa-miR-3940-5p   | NM_001199138 | NLRC4 | 0.000799382 | CDS  |
| hsa-miR-3940-5p   | NM_001199138 | NLRC4 | 0.000281957 | CDS  |
| hsa-miR-3940-5p   | NM_001199138 | NLRC4 | 0.01403961  | CDS  |
| hsa-miR-3943      | NM_001199138 | NLRC4 | 3.03E-05    | CDS  |
| hsa-miR-3944-5p   | NM_001199138 | NLRC4 | 2.50E-05    | CDS  |
| hsa-miR-3944-5p   | NM_001199138 | NLRC4 | 9.02E-06    | CDS  |
| hsa-miR-3944-5p   | NM_001199138 | NLRC4 | 1.36E-05    | CDS  |
| hsa-miR-3944-3p   | NM_001199138 | NLRC4 | 3.41E-07    | CDS  |
| hsa-miR-3944-3p   | NM_001199138 | NLRC4 | 4.59E-06    | CDS  |
| hsa-miR-3945      | NM_001199138 | NLRC4 | 0.003190413 | CDS  |
| hsa-miR-374c-3p   | NM_001199138 | NLRC4 | 0.00216149  | CDS  |
| hsa-miR-374c-3p   | NM_001199138 | NLRC4 | 0.003455527 | CDS  |
| hsa-miR-374c-3p   | NM_001199138 | NLRC4 | 0.000108131 | CDS  |
| hsa-miR-642b-5p   | NM_001199138 | NLRC4 | 0.00011505  | CDS  |
| hsa-miR-642b-5p   | NM_001199138 | NLRC4 | 0.00303577  | CDS  |
| hsa-miR-642b-3p   | NM_001199138 | NLRC4 | 0.003190413 | CDS  |
| hsa-miR-550b-2-5p | NM_001199138 | NLRC4 | 4.91E-06    | CDS  |
| hsa-miR-550b-2-5p | NM_001199138 | NLRC4 | 0.000297589 | CDS  |
| hsa-miR-550b-3p   | NM_001199138 | NLRC4 | 1.12E-05    | CDS  |

|                  |              |       |             |      |
|------------------|--------------|-------|-------------|------|
| hsa-miR-550b-3p  | NM_001199138 | NLRC4 | 0.01016125  | CDS  |
| hsa-miR-1268b    | NM_001199138 | NLRC4 | 0.001170791 | CDS  |
| hsa-miR-1268b    | NM_001199138 | NLRC4 | 0.001897022 | CDS  |
| hsa-miR-378e     | NM_001199138 | NLRC4 | 0.01439129  | CDS  |
| hsa-miR-4418     | NM_001199138 | NLRC4 | 1.12E-06    | CDS  |
| hsa-miR-4418     | NM_001199138 | NLRC4 | 0.000496463 | CDS  |
| hsa-miR-378f     | NM_001199138 | NLRC4 | 0.003596187 | CDS  |
| hsa-miR-378f     | NM_001199138 | NLRC4 | 6.47E-06    | CDS  |
| hsa-miR-378f     | NM_001199138 | NLRC4 | 0.01048706  | CDS  |
| hsa-miR-4420     | NM_001199138 | NLRC4 | 0.000552817 | CDS  |
| hsa-miR-4420     | NM_001199138 | NLRC4 | 0.0172206   | CDS  |
| hsa-miR-4421     | NM_001199138 | NLRC4 | 0.000381964 | CDS  |
| hsa-miR-4421     | NM_001199138 | NLRC4 | 8.35E-05    | CDS  |
| hsa-miR-4422     | NM_001199138 | NLRC4 | 6.12E-08    | CDS  |
| hsa-miR-4422     | NM_001199138 | NLRC4 | 0.000137416 | CDS  |
| hsa-miR-4423-5p  | NM_001199138 | NLRC4 | 0.009935842 | CDS  |
| hsa-miR-4423-5p  | NM_001199138 | NLRC4 | 5.01E-05    | 5UTR |
| hsa-miR-4423-3p  | NM_001199138 | NLRC4 | 6.98E-06    | CDS  |
| hsa-miR-378g     | NM_001199138 | NLRC4 | 1.46E-05    | CDS  |
| hsa-miR-378g     | NM_001199138 | NLRC4 | 7.71E-05    | CDS  |
| hsa-miR-4425     | NM_001199138 | NLRC4 | 4.03E-05    | CDS  |
| hsa-miR-4427     | NM_001199138 | NLRC4 | 6.19E-05    | CDS  |
| hsa-miR-4428     | NM_001199138 | NLRC4 | 0.07187657  | CDS  |
| hsa-miR-4428     | NM_001199138 | NLRC4 | 0.000163267 | CDS  |
| hsa-miR-4429     | NM_001199138 | NLRC4 | 1.46E-05    | CDS  |
| hsa-miR-4429     | NM_001199138 | NLRC4 | 0.00107409  | CDS  |
| hsa-miR-4430     | NM_001199138 | NLRC4 | 0.004437771 | CDS  |
| hsa-miR-4430     | NM_001199138 | NLRC4 | 0.001025993 | CDS  |
| hsa-miR-4431     | NM_001199138 | NLRC4 | 2.15E-05    | CDS  |
| hsa-miR-4433a-5p | NM_001199138 | NLRC4 | 0.008579731 | CDS  |
| hsa-miR-4433a-3p | NM_001199138 | NLRC4 | 0.001170791 | CDS  |
| hsa-miR-4433a-3p | NM_001199138 | NLRC4 | 0.000519233 | CDS  |
| hsa-miR-4433a-3p | NM_001199138 | NLRC4 | 0.01473863  | CDS  |
| hsa-miR-4435     | NM_001199138 | NLRC4 | 0.003650386 | CDS  |
| hsa-miR-4435     | NM_001199138 | NLRC4 | 5.60E-05    | CDS  |
| hsa-miR-4436a    | NM_001199138 | NLRC4 | 0.000605168 | CDS  |
| hsa-miR-4436a    | NM_001199138 | NLRC4 | 3.16E-06    | CDS  |
| hsa-miR-4436a    | NM_001199138 | NLRC4 | 3.15E-05    | CDS  |
| hsa-miR-4437     | NM_001199138 | NLRC4 | 0.0645003   | CDS  |
| hsa-miR-4437     | NM_001199138 | NLRC4 | 1.04E-07    | CDS  |
| hsa-miR-4439     | NM_001199138 | NLRC4 | 0.01718499  | CDS  |
| hsa-miR-4440     | NM_001199138 | NLRC4 | 0.000121469 | CDS  |
| hsa-miR-4440     | NM_001199138 | NLRC4 | 0.000235484 | CDS  |
| hsa-miR-4440     | NM_001199138 | NLRC4 | 7.16E-06    | CDS  |

|                 |              |       |             |      |
|-----------------|--------------|-------|-------------|------|
| hsa-miR-4442    | NM_001199138 | NLRC4 | 0.000126244 | CDS  |
| hsa-miR-4442    | NM_001199138 | NLRC4 | 0.000605168 | CDS  |
| hsa-miR-4442    | NM_001199138 | NLRC4 | 0.01099788  | CDS  |
| hsa-miR-4443    | NM_001199138 | NLRC4 | 0.01630598  | 5UTR |
| hsa-miR-4444    | NM_001199138 | NLRC4 | 0.008129982 | 5UTR |
| hsa-miR-4445-5p | NM_001199138 | NLRC4 | 1.08E-05    | CDS  |
| hsa-miR-4446-5p | NM_001199138 | NLRC4 | 6.06E-05    | CDS  |
| hsa-miR-4446-3p | NM_001199138 | NLRC4 | 0.007721901 | CDS  |
| hsa-miR-4447    | NM_001199138 | NLRC4 | 0.00237631  | CDS  |
| hsa-miR-4447    | NM_001199138 | NLRC4 | 0.009044755 | CDS  |
| hsa-miR-4447    | NM_001199138 | NLRC4 | 0.008258314 | CDS  |
| hsa-miR-4447    | NM_001199138 | NLRC4 | 0.008037564 | CDS  |
| hsa-miR-4448    | NM_001199138 | NLRC4 | 0.000129339 | CDS  |
| hsa-miR-4448    | NM_001199138 | NLRC4 | 0.000618871 | CDS  |
| hsa-miR-4449    | NM_001199138 | NLRC4 | 1.98E-07    | CDS  |
| hsa-miR-4449    | NM_001199138 | NLRC4 | 0.000246572 | CDS  |
| hsa-miR-4450    | NM_001199138 | NLRC4 | 0.00177024  | CDS  |
| hsa-miR-4450    | NM_001199138 | NLRC4 | 0.2077442   | CDS  |
| hsa-miR-4450    | NM_001199138 | NLRC4 | 0.03151826  | CDS  |
| hsa-miR-4451    | NM_001199138 | NLRC4 | 0.02421421  | CDS  |
| hsa-miR-4451    | NM_001199138 | NLRC4 | 0.000755782 | CDS  |
| hsa-miR-4452    | NM_001199138 | NLRC4 | 0.003529999 | CDS  |
| hsa-miR-4454    | NM_001199138 | NLRC4 | 5.84E-05    | CDS  |
| hsa-miR-4454    | NM_001199138 | NLRC4 | 0.0264118   | CDS  |
| hsa-miR-4456    | NM_001199138 | NLRC4 | 8.53E-06    | CDS  |
| hsa-miR-4458    | NM_001199138 | NLRC4 | 0.08871414  | CDS  |
| hsa-miR-378h    | NM_001199138 | NLRC4 | 0.003596187 | CDS  |
| hsa-miR-3135b   | NM_001199138 | NLRC4 | 0.00216149  | CDS  |
| hsa-miR-4462    | NM_001199138 | NLRC4 | 0.02815115  | CDS  |
| hsa-miR-4463    | NM_001199138 | NLRC4 | 0.08150963  | CDS  |
| hsa-miR-4463    | NM_001199138 | NLRC4 | 2.55E-05    | CDS  |
| hsa-miR-4463    | NM_001199138 | NLRC4 | 0.000241027 | CDS  |
| hsa-miR-4463    | NM_001199138 | NLRC4 | 0.000427409 | CDS  |
| hsa-miR-4465    | NM_001199138 | NLRC4 | 0.001069961 | CDS  |
| hsa-miR-4466    | NM_001199138 | NLRC4 | 8.25E-06    | CDS  |
| hsa-miR-4466    | NM_001199138 | NLRC4 | 0.000608953 | CDS  |
| hsa-miR-4467    | NM_001199138 | NLRC4 | 8.97E-06    | CDS  |
| hsa-miR-4467    | NM_001199138 | NLRC4 | 0.008461483 | CDS  |
| hsa-miR-4469    | NM_001199138 | NLRC4 | 7.01E-06    | CDS  |
| hsa-miR-4469    | NM_001199138 | NLRC4 | 0.000116174 | CDS  |
| hsa-miR-4472    | NM_001199138 | NLRC4 | 0.009044755 | CDS  |
| hsa-miR-4472    | NM_001199138 | NLRC4 | 0.000933789 | CDS  |
| hsa-miR-4474-5p | NM_001199138 | NLRC4 | 0.000265177 | CDS  |
| hsa-miR-4474-3p | NM_001199138 | NLRC4 | 0.006712235 | CDS  |



|                 |              |       |             |      |
|-----------------|--------------|-------|-------------|------|
| hsa-miR-4474-3p | NM_001199138 | NLRC4 | 9.02E-06    | CDS  |
| hsa-miR-4475    | NM_001199138 | NLRC4 | 0.002224226 | CDS  |
| hsa-miR-4475    | NM_001199138 | NLRC4 | 5.47E-06    | CDS  |
| hsa-miR-4476    | NM_001199138 | NLRC4 | 1.73E-05    | CDS  |
| hsa-miR-4477b   | NM_001199138 | NLRC4 | 0.02268423  | CDS  |
| hsa-miR-4478    | NM_001199138 | NLRC4 | 0.005514936 | CDS  |
| hsa-miR-4478    | NM_001199138 | NLRC4 | 0.000598122 | CDS  |
| hsa-miR-4478    | NM_001199138 | NLRC4 | 7.19E-05    | CDS  |
| hsa-miR-3689d   | NM_001199138 | NLRC4 | 3.74E-07    | CDS  |
| hsa-miR-3689d   | NM_001199138 | NLRC4 | 0.000637386 | 5UTR |
| hsa-miR-3689e   | NM_001199138 | NLRC4 | 8.91E-06    | CDS  |
| hsa-miR-3689e   | NM_001199138 | NLRC4 | 0.000169476 | CDS  |
| hsa-miR-3689e   | NM_001199138 | NLRC4 | 0.000123515 | CDS  |
| hsa-miR-3689f   | NM_001199138 | NLRC4 | 0.01801811  | CDS  |
| hsa-miR-3689f   | NM_001199138 | NLRC4 | 0.00345569  | CDS  |
| hsa-miR-4479    | NM_001199138 | NLRC4 | 0.000120896 | CDS  |
| hsa-miR-4479    | NM_001199138 | NLRC4 | 2.59E-05    | CDS  |
| hsa-miR-3155b   | NM_001199138 | NLRC4 | 6.15E-05    | CDS  |
| hsa-miR-3155b   | NM_001199138 | NLRC4 | 0.001170791 | CDS  |
| hsa-miR-4481    | NM_001199138 | NLRC4 | 0.00237631  | CDS  |
| hsa-miR-4482-5p | NM_001199138 | NLRC4 | 0.00014298  | CDS  |
| hsa-miR-4482-3p | NM_001199138 | NLRC4 | 0.1226768   | 5UTR |
| hsa-miR-4482-3p | NM_001199138 | NLRC4 | 0.1194994   | CDS  |
| hsa-miR-4482-3p | NM_001199138 | NLRC4 | 5.25E-05    | CDS  |
| hsa-miR-4483    | NM_001199138 | NLRC4 | 0.00237631  | CDS  |
| hsa-miR-4483    | NM_001199138 | NLRC4 | 0.005126806 | CDS  |
| hsa-miR-4484    | NM_001199138 | NLRC4 | 0.000345859 | CDS  |
| hsa-miR-4485-5p | NM_001199138 | NLRC4 | 8.27E-06    | CDS  |
| hsa-miR-4485-5p | NM_001199138 | NLRC4 | 8.36E-06    | CDS  |
| hsa-miR-4486    | NM_001199138 | NLRC4 | 0.000116549 | CDS  |
| hsa-miR-4486    | NM_001199138 | NLRC4 | 0.00216149  | CDS  |
| hsa-miR-4488    | NM_001199138 | NLRC4 | 0.001661235 | CDS  |
| hsa-miR-4488    | NM_001199138 | NLRC4 | 0.005514936 | CDS  |
| hsa-miR-4488    | NM_001199138 | NLRC4 | 4.99E-06    | CDS  |
| hsa-miR-4489    | NM_001199138 | NLRC4 | 0.01176218  | CDS  |
| hsa-miR-4489    | NM_001199138 | NLRC4 | 0.003706663 | CDS  |
| hsa-miR-4491    | NM_001199138 | NLRC4 | 7.06E-05    | CDS  |
| hsa-miR-4491    | NM_001199138 | NLRC4 | 0.05121052  | CDS  |
| hsa-miR-4492    | NM_001199138 | NLRC4 | 7.68E-06    | CDS  |
| hsa-miR-4492    | NM_001199138 | NLRC4 | 5.97E-06    | CDS  |
| hsa-miR-4493    | NM_001199138 | NLRC4 | 5.60E-05    | CDS  |
| hsa-miR-4493    | NM_001199138 | NLRC4 | 0.000337248 | 5UTR |
| hsa-miR-4494    | NM_001199138 | NLRC4 | 0.000238785 | CDS  |
| hsa-miR-4494    | NM_001199138 | NLRC4 | 1.96E-05    | CDS  |

|                 |              |       |             |      |
|-----------------|--------------|-------|-------------|------|
| hsa-miR-4496    | NM_001199138 | NLRC4 | 0.00933987  | CDS  |
| hsa-miR-4497    | NM_001199138 | NLRC4 | 3.98E-05    | CDS  |
| hsa-miR-4498    | NM_001199138 | NLRC4 | 0.001139799 | CDS  |
| hsa-miR-4498    | NM_001199138 | NLRC4 | 0.00016652  | CDS  |
| hsa-miR-4498    | NM_001199138 | NLRC4 | 0.001447161 | CDS  |
| hsa-miR-4499    | NM_001199138 | NLRC4 | 0.01730902  | CDS  |
| hsa-miR-4501    | NM_001199138 | NLRC4 | 0.000123515 | CDS  |
| hsa-miR-4501    | NM_001199138 | NLRC4 | 3.16E-05    | CDS  |
| hsa-miR-4502    | NM_001199138 | NLRC4 | 0.01388705  | CDS  |
| hsa-miR-4505    | NM_001199138 | NLRC4 | 0.001025993 | CDS  |
| hsa-miR-4506    | NM_001199138 | NLRC4 | 0.001750774 | CDS  |
| hsa-miR-4506    | NM_001199138 | NLRC4 | 0.1222725   | CDS  |
| hsa-miR-2392    | NM_001199138 | NLRC4 | 8.25E-06    | CDS  |
| hsa-miR-2392    | NM_001199138 | NLRC4 | 0.000346237 | 5UTR |
| hsa-miR-2392    | NM_001199138 | NLRC4 | 0.01924989  | CDS  |
| hsa-miR-4507    | NM_001199138 | NLRC4 | 1.46E-05    | CDS  |
| hsa-miR-4507    | NM_001199138 | NLRC4 | 0.01465807  | CDS  |
| hsa-miR-4507    | NM_001199138 | NLRC4 | 7.71E-05    | CDS  |
| hsa-miR-4510    | NM_001199138 | NLRC4 | 0.000153868 | CDS  |
| hsa-miR-4510    | NM_001199138 | NLRC4 | 0.02741169  | CDS  |
| hsa-miR-4511    | NM_001199138 | NLRC4 | 0.003385126 | CDS  |
| hsa-miR-4511    | NM_001199138 | NLRC4 | 0.04411314  | CDS  |
| hsa-miR-4512    | NM_001199138 | NLRC4 | 0.001727314 | CDS  |
| hsa-miR-4512    | NM_001199138 | NLRC4 | 3.69E-06    | CDS  |
| hsa-miR-4513    | NM_001199138 | NLRC4 | 0.000241027 | CDS  |
| hsa-miR-4513    | NM_001199138 | NLRC4 | 4.41E-05    | CDS  |
| hsa-miR-4514    | NM_001199138 | NLRC4 | 0.1067239   | CDS  |
| hsa-miR-4514    | NM_001199138 | NLRC4 | 0.002677635 | CDS  |
| hsa-miR-4515    | NM_001199138 | NLRC4 | 3.58E-06    | CDS  |
| hsa-miR-4516    | NM_001199138 | NLRC4 | 0.07702311  | CDS  |
| hsa-miR-4518    | NM_001199138 | NLRC4 | 0.07041108  | CDS  |
| hsa-miR-4518    | NM_001199138 | NLRC4 | 0.009066731 | CDS  |
| hsa-miR-4519    | NM_001199138 | NLRC4 | 0.004110503 | CDS  |
| hsa-miR-4519    | NM_001199138 | NLRC4 | 1.33E-07    | CDS  |
| hsa-miR-4519    | NM_001199138 | NLRC4 | 0.002536929 | CDS  |
| hsa-miR-4520-5p | NM_001199138 | NLRC4 | 0.000107277 | CDS  |
| hsa-miR-4520-5p | NM_001199138 | NLRC4 | 0.03271231  | CDS  |
| hsa-miR-4520-5p | NM_001199138 | NLRC4 | 0.006567177 | CDS  |
| hsa-miR-1269b   | NM_001199138 | NLRC4 | 0.000238785 | CDS  |
| hsa-miR-4522    | NM_001199138 | NLRC4 | 5.78E-07    | CDS  |
| hsa-miR-4522    | NM_001199138 | NLRC4 | 5.54E-06    | CDS  |
| hsa-miR-4522    | NM_001199138 | NLRC4 | 2.94E-05    | CDS  |
| hsa-miR-4523    | NM_001199138 | NLRC4 | 0.004958121 | CDS  |
| hsa-miR-4523    | NM_001199138 | NLRC4 | 0.002744589 | CDS  |

|                  |              |       |             |      |
|------------------|--------------|-------|-------------|------|
| hsa-miR-4524a-5p | NM_001199138 | NLRC4 | 9.20E-06    | CDS  |
| hsa-miR-4524a-5p | NM_001199138 | NLRC4 | 0.000217711 | CDS  |
| hsa-miR-4524a-3p | NM_001199138 | NLRC4 | 0.001742576 | CDS  |
| hsa-miR-4525     | NM_001199138 | NLRC4 | 6.08E-05    | CDS  |
| hsa-miR-4526     | NM_001199138 | NLRC4 | 0.0101559   | CDS  |
| hsa-miR-4526     | NM_001199138 | NLRC4 | 1.77E-06    | CDS  |
| hsa-miR-4527     | NM_001199138 | NLRC4 | 0.009486119 | CDS  |
| hsa-miR-4529-5p  | NM_001199138 | NLRC4 | 3.58E-06    | CDS  |
| hsa-miR-4529-3p  | NM_001199138 | NLRC4 | 0.000104356 | CDS  |
| hsa-miR-4530     | NM_001199138 | NLRC4 | 1.52E-06    | CDS  |
| hsa-miR-4531     | NM_001199138 | NLRC4 | 0.001640847 | 5UTR |
| hsa-miR-4533     | NM_001199138 | NLRC4 | 0.01842555  | CDS  |
| hsa-miR-4533     | NM_001199138 | NLRC4 | 0.02468582  | CDS  |
| hsa-miR-4534     | NM_001199138 | NLRC4 | 0.01924989  | CDS  |
| hsa-miR-4534     | NM_001199138 | NLRC4 | 0.01001738  | CDS  |
| hsa-miR-4535     | NM_001199138 | NLRC4 | 0.005514936 | CDS  |
| hsa-miR-1587     | NM_001199138 | NLRC4 | 1.46E-05    | CDS  |
| hsa-miR-1587     | NM_001199138 | NLRC4 | 0.0645003   | CDS  |
| hsa-miR-1587     | NM_001199138 | NLRC4 | 0.002020599 | CDS  |
| hsa-miR-548an    | NM_001199138 | NLRC4 | 0.000859196 | CDS  |
| hsa-miR-4537     | NM_001199138 | NLRC4 | 0.01247752  | CDS  |
| hsa-miR-4537     | NM_001199138 | NLRC4 | 0.000196593 | CDS  |
| hsa-miR-4537     | NM_001199138 | NLRC4 | 0.005109208 | CDS  |
| hsa-miR-4537     | NM_001199138 | NLRC4 | 8.56E-06    | CDS  |
| hsa-miR-4538     | NM_001199138 | NLRC4 | 0.001031207 | CDS  |
| hsa-miR-4538     | NM_001199138 | NLRC4 | 0.01910603  | CDS  |
| hsa-miR-4538     | NM_001199138 | NLRC4 | 0.009768947 | CDS  |
| hsa-miR-4539     | NM_001199138 | NLRC4 | 0.001027397 | CDS  |
| hsa-miR-4539     | NM_001199138 | NLRC4 | 0.02677736  | CDS  |
| hsa-miR-4540     | NM_001199138 | NLRC4 | 6.26E-05    | CDS  |
| hsa-miR-3960     | NM_001199138 | NLRC4 | 0.001025993 | CDS  |
| hsa-miR-3960     | NM_001199138 | NLRC4 | 1.00E-06    | CDS  |
| hsa-miR-3960     | NM_001199138 | NLRC4 | 0.000105297 | CDS  |
| hsa-miR-3972     | NM_001199138 | NLRC4 | 1.22E-05    | CDS  |
| hsa-miR-3972     | NM_001199138 | NLRC4 | 3.81E-05    | CDS  |
| hsa-miR-3972     | NM_001199138 | NLRC4 | 0.000495206 | CDS  |
| hsa-miR-3975     | NM_001199138 | NLRC4 | 0.02308526  | CDS  |
| hsa-miR-3976     | NM_001199138 | NLRC4 | 0.006459822 | CDS  |
| hsa-miR-3977     | NM_001199138 | NLRC4 | 0.002346565 | CDS  |
| hsa-miR-3978     | NM_001199138 | NLRC4 | 0.000345859 | CDS  |
| hsa-miR-4632-5p  | NM_001199138 | NLRC4 | 9.02E-05    | CDS  |
| hsa-miR-4632-5p  | NM_001199138 | NLRC4 | 0.000133333 | CDS  |
| hsa-miR-4632-3p  | NM_001199138 | NLRC4 | 5.87E-05    | CDS  |
| hsa-miR-4632-3p  | NM_001199138 | NLRC4 | 0.000126244 | CDS  |

|                 |              |       |             |     |
|-----------------|--------------|-------|-------------|-----|
| hsa-miR-4632-3p | NM_001199138 | NLRC4 | 0.000487376 | CDS |
| hsa-miR-4632-3p | NM_001199138 | NLRC4 | 6.02E-06    | CDS |
| hsa-miR-4633-5p | NM_001199138 | NLRC4 | 0.01388229  | CDS |
| hsa-miR-4633-3p | NM_001199138 | NLRC4 | 4.59E-05    | CDS |
| hsa-miR-4633-3p | NM_001199138 | NLRC4 | 3.68E-05    | CDS |
| hsa-miR-4634    | NM_001199138 | NLRC4 | 1.39E-05    | CDS |
| hsa-miR-4634    | NM_001199138 | NLRC4 | 2.59E-05    | CDS |
| hsa-miR-4634    | NM_001199138 | NLRC4 | 6.67E-05    | CDS |
| hsa-miR-4635    | NM_001199138 | NLRC4 | 2.96E-05    | CDS |
| hsa-miR-4638-5p | NM_001199138 | NLRC4 | 0.00011008  | CDS |
| hsa-miR-4638-5p | NM_001199138 | NLRC4 | 2.51E-05    | CDS |
| hsa-miR-4638-3p | NM_001199138 | NLRC4 | 0.000115647 | CDS |
| hsa-miR-4639-3p | NM_001199138 | NLRC4 | 2.98E-05    | CDS |
| hsa-miR-4640-3p | NM_001199138 | NLRC4 | 6.33E-06    | CDS |
| hsa-miR-4640-3p | NM_001199138 | NLRC4 | 0.000381964 | CDS |
| hsa-miR-4641    | NM_001199138 | NLRC4 | 0.00014298  | CDS |
| hsa-miR-4642    | NM_001199138 | NLRC4 | 0.003651178 | CDS |
| hsa-miR-4645-3p | NM_001199138 | NLRC4 | 0.007995041 | CDS |
| hsa-miR-4646-5p | NM_001199138 | NLRC4 | 0.08241963  | CDS |
| hsa-miR-4646-5p | NM_001199138 | NLRC4 | 0.00107409  | CDS |
| hsa-miR-4646-5p | NM_001199138 | NLRC4 | 3.41E-07    | CDS |
| hsa-miR-4646-3p | NM_001199138 | NLRC4 | 0.000148632 | CDS |
| hsa-miR-4647    | NM_001199138 | NLRC4 | 0.000123213 | CDS |
| hsa-miR-4647    | NM_001199138 | NLRC4 | 0.000297589 | CDS |
| hsa-miR-4648    | NM_001199138 | NLRC4 | 0.001053639 | CDS |
| hsa-miR-4648    | NM_001199138 | NLRC4 | 0.000248928 | CDS |
| hsa-miR-4648    | NM_001199138 | NLRC4 | 0.000189447 | CDS |
| hsa-miR-4649-5p | NM_001199138 | NLRC4 | 0.000427409 | CDS |
| hsa-miR-4649-5p | NM_001199138 | NLRC4 | 0.001447161 | CDS |
| hsa-miR-4649-3p | NM_001199138 | NLRC4 | 0.007691023 | CDS |
| hsa-miR-4650-5p | NM_001199138 | NLRC4 | 0.000772438 | CDS |
| hsa-miR-4651    | NM_001199138 | NLRC4 | 0.008073378 | CDS |
| hsa-miR-4651    | NM_001199138 | NLRC4 | 6.00E-06    | CDS |
| hsa-miR-4652-5p | NM_001199138 | NLRC4 | 0.001661235 | CDS |
| hsa-miR-4652-3p | NM_001199138 | NLRC4 | 0.00033047  | CDS |
| hsa-miR-4652-3p | NM_001199138 | NLRC4 | 0.01971301  | CDS |
| hsa-miR-4653-5p | NM_001199138 | NLRC4 | 0.08763861  | CDS |
| hsa-miR-4653-3p | NM_001199138 | NLRC4 | 0.002206803 | CDS |
| hsa-miR-4653-3p | NM_001199138 | NLRC4 | 0.000478711 | CDS |
| hsa-miR-4654    | NM_001199138 | NLRC4 | 0.000743386 | CDS |
| hsa-miR-4654    | NM_001199138 | NLRC4 | 0.01545477  | CDS |
| hsa-miR-4655-5p | NM_001199138 | NLRC4 | 0.01479238  | CDS |
| hsa-miR-4655-5p | NM_001199138 | NLRC4 | 1.96E-05    | CDS |
| hsa-miR-4655-3p | NM_001199138 | NLRC4 | 4.54E-05    | CDS |

|                  |              |       |             |      |
|------------------|--------------|-------|-------------|------|
| hsa-miR-4655-3p  | NM_001199138 | NLRC4 | 7.95E-06    | CDS  |
| hsa-miR-4655-3p  | NM_001199138 | NLRC4 | 0.000251763 | CDS  |
| hsa-miR-4655-3p  | NM_001199138 | NLRC4 | 7.76E-05    | CDS  |
| hsa-miR-4656     | NM_001199138 | NLRC4 | 3.41E-07    | CDS  |
| hsa-miR-4656     | NM_001199138 | NLRC4 | 0.000755782 | CDS  |
| hsa-miR-4657     | NM_001199138 | NLRC4 | 0.02308038  | CDS  |
| hsa-miR-4658     | NM_001199138 | NLRC4 | 3.74E-07    | CDS  |
| hsa-miR-4658     | NM_001199138 | NLRC4 | 0.04484888  | CDS  |
| hsa-miR-4659a-3p | NM_001199138 | NLRC4 | 4.27E-05    | CDS  |
| hsa-miR-4660     | NM_001199138 | NLRC4 | 1.43E-05    | CDS  |
| hsa-miR-4661-3p  | NM_001199138 | NLRC4 | 7.01E-06    | CDS  |
| hsa-miR-4662a-5p | NM_001199138 | NLRC4 | 0.000993094 | CDS  |
| hsa-miR-4662a-5p | NM_001199138 | NLRC4 | 0.0002043   | 5UTR |
| hsa-miR-4659b-3p | NM_001199138 | NLRC4 | 4.27E-05    | CDS  |
| hsa-miR-4664-5p  | NM_001199138 | NLRC4 | 0.000268963 | CDS  |
| hsa-miR-4664-3p  | NM_001199138 | NLRC4 | 0.000158814 | CDS  |
| hsa-miR-4664-3p  | NM_001199138 | NLRC4 | 6.44E-07    | CDS  |
| hsa-miR-4664-3p  | NM_001199138 | NLRC4 | 0.04209148  | 5UTR |
| hsa-miR-4665-3p  | NM_001199138 | NLRC4 | 0.001031207 | CDS  |
| hsa-miR-4667-5p  | NM_001199138 | NLRC4 | 0.04319399  | CDS  |
| hsa-miR-4667-5p  | NM_001199138 | NLRC4 | 4.41E-05    | CDS  |
| hsa-miR-4667-5p  | NM_001199138 | NLRC4 | 0.000109036 | CDS  |
| hsa-miR-4667-3p  | NM_001199138 | NLRC4 | 0.0210857   | CDS  |
| hsa-miR-219b-5p  | NM_001199138 | NLRC4 | 1.56E-05    | CDS  |
| hsa-miR-219b-3p  | NM_001199138 | NLRC4 | 6.94E-05    | CDS  |
| hsa-miR-4669     | NM_001199138 | NLRC4 | 7.53E-05    | CDS  |
| hsa-miR-4669     | NM_001199138 | NLRC4 | 0.01110275  | CDS  |
| hsa-miR-4669     | NM_001199138 | NLRC4 | 0.001372113 | CDS  |
| hsa-miR-4670-3p  | NM_001199138 | NLRC4 | 0.005519711 | CDS  |
| hsa-miR-4671-5p  | NM_001199138 | NLRC4 | 0.009164864 | CDS  |
| hsa-miR-4672     | NM_001199138 | NLRC4 | 0.003203264 | CDS  |
| hsa-miR-4672     | NM_001199138 | NLRC4 | 0.000536357 | CDS  |
| hsa-miR-4674     | NM_001199138 | NLRC4 | 4.98E-06    | CDS  |
| hsa-miR-4674     | NM_001199138 | NLRC4 | 1.46E-05    | CDS  |
| hsa-miR-4674     | NM_001199138 | NLRC4 | 6.15E-05    | CDS  |
| hsa-miR-4676-3p  | NM_001199138 | NLRC4 | 3.07E-05    | CDS  |
| hsa-miR-4676-3p  | NM_001199138 | NLRC4 | 0.000535268 | CDS  |
| hsa-miR-4677-5p  | NM_001199138 | NLRC4 | 0.001083295 | CDS  |
| hsa-miR-4677-5p  | NM_001199138 | NLRC4 | 0.01912106  | CDS  |
| hsa-miR-4677-5p  | NM_001199138 | NLRC4 | 0.003518183 | CDS  |
| hsa-miR-4677-5p  | NM_001199138 | NLRC4 | 0.001965083 | CDS  |
| hsa-miR-4681     | NM_001199138 | NLRC4 | 0.00216149  | CDS  |
| hsa-miR-4681     | NM_001199138 | NLRC4 | 0.001742576 | CDS  |
| hsa-miR-4682     | NM_001199138 | NLRC4 | 5.45E-06    | CDS  |

|                 |              |       |             |      |
|-----------------|--------------|-------|-------------|------|
| hsa-miR-4682    | NM_001199138 | NLRC4 | 0.01048706  | CDS  |
| hsa-miR-4683    | NM_001199138 | NLRC4 | 5.34E-05    | CDS  |
| hsa-miR-4683    | NM_001199138 | NLRC4 | 0.000509192 | CDS  |
| hsa-miR-4684-5p | NM_001199138 | NLRC4 | 3.07E-05    | CDS  |
| hsa-miR-4684-3p | NM_001199138 | NLRC4 | 0.000502803 | CDS  |
| hsa-miR-4685-5p | NM_001199138 | NLRC4 | 3.70E-07    | CDS  |
| hsa-miR-4685-5p | NM_001199138 | NLRC4 | 3.78E-05    | CDS  |
| hsa-miR-4685-5p | NM_001199138 | NLRC4 | 0.007721901 | CDS  |
| hsa-miR-4685-5p | NM_001199138 | NLRC4 | 0.000326334 | CDS  |
| hsa-miR-4685-3p | NM_001199138 | NLRC4 | 0.000583201 | CDS  |
| hsa-miR-4686    | NM_001199138 | NLRC4 | 0.1399983   | CDS  |
| hsa-miR-4686    | NM_001199138 | NLRC4 | 0.001120008 | CDS  |
| hsa-miR-4687-5p | NM_001199138 | NLRC4 | 0.000170659 | CDS  |
| hsa-miR-4687-3p | NM_001199138 | NLRC4 | 2.51E-05    | CDS  |
| hsa-miR-4687-3p | NM_001199138 | NLRC4 | 0.01105221  | CDS  |
| hsa-miR-4687-3p | NM_001199138 | NLRC4 | 0.00116715  | CDS  |
| hsa-miR-1343-5p | NM_001199138 | NLRC4 | 9.24E-06    | CDS  |
| hsa-miR-1343-3p | NM_001199138 | NLRC4 | 0.000107277 | CDS  |
| hsa-miR-1343-3p | NM_001199138 | NLRC4 | 0.000244245 | CDS  |
| hsa-miR-1343-3p | NM_001199138 | NLRC4 | 4.98E-06    | CDS  |
| hsa-miR-4688    | NM_001199138 | NLRC4 | 0.01473863  | CDS  |
| hsa-miR-4689    | NM_001199138 | NLRC4 | 4.41E-05    | CDS  |
| hsa-miR-4689    | NM_001199138 | NLRC4 | 0.0696302   | CDS  |
| hsa-miR-4689    | NM_001199138 | NLRC4 | 0.01000834  | CDS  |
| hsa-miR-4690-5p | NM_001199138 | NLRC4 | 0.000133333 | CDS  |
| hsa-miR-4690-5p | NM_001199138 | NLRC4 | 0.001742576 | CDS  |
| hsa-miR-4690-3p | NM_001199138 | NLRC4 | 6.39E-05    | CDS  |
| hsa-miR-4690-3p | NM_001199138 | NLRC4 | 0.000217711 | CDS  |
| hsa-miR-4691-5p | NM_001199138 | NLRC4 | 0.000239915 | CDS  |
| hsa-miR-4691-5p | NM_001199138 | NLRC4 | 0.000125663 | CDS  |
| hsa-miR-4691-5p | NM_001199138 | NLRC4 | 0.001383748 | CDS  |
| hsa-miR-4691-3p | NM_001199138 | NLRC4 | 1.83E-05    | CDS  |
| hsa-miR-4691-3p | NM_001199138 | NLRC4 | 0.008073378 | CDS  |
| hsa-miR-4692    | NM_001199138 | NLRC4 | 2.75E-07    | CDS  |
| hsa-miR-4692    | NM_001199138 | NLRC4 | 0.01420162  | CDS  |
| hsa-miR-4693-3p | NM_001199138 | NLRC4 | 0.000205155 | CDS  |
| hsa-miR-4695-5p | NM_001199138 | NLRC4 | 1.73E-05    | CDS  |
| hsa-miR-4695-3p | NM_001199138 | NLRC4 | 0.002434622 | CDS  |
| hsa-miR-4697-5p | NM_001199138 | NLRC4 | 0.000142999 | CDS  |
| hsa-miR-4697-5p | NM_001199138 | NLRC4 | 0.001633284 | CDS  |
| hsa-miR-4697-3p | NM_001199138 | NLRC4 | 2.08E-05    | CDS  |
| hsa-miR-4700-5p | NM_001199138 | NLRC4 | 0.01391007  | 5UTR |
| hsa-miR-4700-3p | NM_001199138 | NLRC4 | 0.001033441 | CDS  |
| hsa-miR-4701-3p | NM_001199138 | NLRC4 | 8.25E-06    | CDS  |

|                 |              |       |             |      |
|-----------------|--------------|-------|-------------|------|
| hsa-miR-4704-3p | NM_001199138 | NLRC4 | 1.83E-05    | CDS  |
| hsa-miR-4705    | NM_001199138 | NLRC4 | 6.65E-06    | CDS  |
| hsa-miR-4706    | NM_001199138 | NLRC4 | 0.000855203 | CDS  |
| hsa-miR-4706    | NM_001199138 | NLRC4 | 0.004509441 | CDS  |
| hsa-miR-4707-5p | NM_001199138 | NLRC4 | 1.98E-07    | CDS  |
| hsa-miR-4707-5p | NM_001199138 | NLRC4 | 0.001499137 | CDS  |
| hsa-miR-4707-5p | NM_001199138 | NLRC4 | 6.57E-06    | CDS  |
| hsa-miR-4707-3p | NM_001199138 | NLRC4 | 3.58E-06    | CDS  |
| hsa-miR-4708-5p | NM_001199138 | NLRC4 | 0.000123213 | CDS  |
| hsa-miR-4708-5p | NM_001199138 | NLRC4 | 0.000509192 | CDS  |
| hsa-miR-4709-5p | NM_001199138 | NLRC4 | 0.002114959 | CDS  |
| hsa-miR-4709-3p | NM_001199138 | NLRC4 | 0.004849261 | CDS  |
| hsa-miR-4709-3p | NM_001199138 | NLRC4 | 0.01220348  | CDS  |
| hsa-miR-203b-5p | NM_001199138 | NLRC4 | 2.65E-05    | CDS  |
| hsa-miR-4710    | NM_001199138 | NLRC4 | 8.25E-06    | CDS  |
| hsa-miR-4710    | NM_001199138 | NLRC4 | 9.29E-05    | CDS  |
| hsa-miR-4710    | NM_001199138 | NLRC4 | 0.009044755 | CDS  |
| hsa-miR-4711-5p | NM_001199138 | NLRC4 | 0.000668222 | 5UTR |
| hsa-miR-4711-3p | NM_001199138 | NLRC4 | 0.000802077 | CDS  |
| hsa-miR-4711-3p | NM_001199138 | NLRC4 | 0.01050676  | CDS  |
| hsa-miR-4711-3p | NM_001199138 | NLRC4 | 0.04836105  | CDS  |
| hsa-miR-4712-5p | NM_001199138 | NLRC4 | 5.71E-06    | CDS  |
| hsa-miR-4713-5p | NM_001199138 | NLRC4 | 0.000106281 | CDS  |
| hsa-miR-4713-5p | NM_001199138 | NLRC4 | 0.000245493 | CDS  |
| hsa-miR-4713-5p | NM_001199138 | NLRC4 | 0.001035763 | CDS  |
| hsa-miR-4713-3p | NM_001199138 | NLRC4 | 0.01708205  | CDS  |
| hsa-miR-4713-3p | NM_001199138 | NLRC4 | 0.001633284 | CDS  |
| hsa-miR-4714-5p | NM_001199138 | NLRC4 | 3.09E-05    | CDS  |
| hsa-miR-4714-3p | NM_001199138 | NLRC4 | 6.18E-05    | CDS  |
| hsa-miR-4714-3p | NM_001199138 | NLRC4 | 0.000123462 | CDS  |
| hsa-miR-4715-5p | NM_001199138 | NLRC4 | 0.000215072 | CDS  |
| hsa-miR-4715-5p | NM_001199138 | NLRC4 | 0.003864711 | CDS  |
| hsa-miR-4715-3p | NM_001199138 | NLRC4 | 0.000368725 | CDS  |
| hsa-miR-4715-3p | NM_001199138 | NLRC4 | 7.82E-05    | CDS  |
| hsa-miR-4715-3p | NM_001199138 | NLRC4 | 0.000196593 | CDS  |
| hsa-miR-4715-3p | NM_001199138 | NLRC4 | 8.36E-06    | CDS  |
| hsa-miR-4716-5p | NM_001199138 | NLRC4 | 0.01199923  | CDS  |
| hsa-miR-4716-3p | NM_001199138 | NLRC4 | 0.03964555  | CDS  |
| hsa-miR-4716-3p | NM_001199138 | NLRC4 | 0.05553747  | CDS  |
| hsa-miR-3529-5p | NM_001199138 | NLRC4 | 0.001077566 | 5UTR |
| hsa-miR-4717-5p | NM_001199138 | NLRC4 | 5.85E-06    | CDS  |
| hsa-miR-4717-5p | NM_001199138 | NLRC4 | 0.001447161 | CDS  |
| hsa-miR-4717-3p | NM_001199138 | NLRC4 | 0.02888349  | CDS  |
| hsa-miR-4720-5p | NM_001199138 | NLRC4 | 0.0011826   | CDS  |

|                 |              |       |             |     |
|-----------------|--------------|-------|-------------|-----|
| hsa-miR-4721    | NM_001199138 | NLRC4 | 5.49E-05    | CDS |
| hsa-miR-4722-5p | NM_001199138 | NLRC4 | 1.85E-05    | CDS |
| hsa-miR-4722-5p | NM_001199138 | NLRC4 | 8.69E-06    | CDS |
| hsa-miR-4722-3p | NM_001199138 | NLRC4 | 7.91E-05    | CDS |
| hsa-miR-4722-3p | NM_001199138 | NLRC4 | 2.27E-05    | CDS |
| hsa-miR-4723-5p | NM_001199138 | NLRC4 | 0.000135949 | CDS |
| hsa-miR-4723-5p | NM_001199138 | NLRC4 | 4.66E-05    | CDS |
| hsa-miR-4723-5p | NM_001199138 | NLRC4 | 0.001661235 | CDS |
| hsa-miR-4723-3p | NM_001199138 | NLRC4 | 0.001383748 | CDS |
| hsa-miR-4723-3p | NM_001199138 | NLRC4 | 0.00014298  | CDS |
| hsa-miR-451b    | NM_001199138 | NLRC4 | 9.54E-06    | CDS |
| hsa-miR-4724-5p | NM_001199138 | NLRC4 | 0.01048706  | CDS |
| hsa-miR-4724-5p | NM_001199138 | NLRC4 | 0.001372911 | CDS |
| hsa-miR-4724-3p | NM_001199138 | NLRC4 | 8.56E-06    | CDS |
| hsa-miR-4724-3p | NM_001199138 | NLRC4 | 1.88E-05    | CDS |
| hsa-miR-4724-3p | NM_001199138 | NLRC4 | 0.07198429  | CDS |
| hsa-miR-4725-5p | NM_001199138 | NLRC4 | 0.00372152  | CDS |
| hsa-miR-4725-3p | NM_001199138 | NLRC4 | 9.02E-05    | CDS |
| hsa-miR-4726-5p | NM_001199138 | NLRC4 | 3.41E-07    | CDS |
| hsa-miR-4726-5p | NM_001199138 | NLRC4 | 0.02447189  | CDS |
| hsa-miR-4726-3p | NM_001199138 | NLRC4 | 7.76E-05    | CDS |
| hsa-miR-4726-3p | NM_001199138 | NLRC4 | 1.04E-05    | CDS |
| hsa-miR-4726-3p | NM_001199138 | NLRC4 | 0.000166253 | CDS |
| hsa-miR-4726-3p | NM_001199138 | NLRC4 | 6.15E-05    | CDS |
| hsa-miR-4727-5p | NM_001199138 | NLRC4 | 7.95E-06    | CDS |
| hsa-miR-4727-5p | NM_001199138 | NLRC4 | 6.54E-06    | CDS |
| hsa-miR-4728-5p | NM_001199138 | NLRC4 | 9.13E-05    | CDS |
| hsa-miR-4728-5p | NM_001199138 | NLRC4 | 0.009056833 | CDS |
| hsa-miR-4728-5p | NM_001199138 | NLRC4 | 0.02468582  | CDS |
| hsa-miR-4728-3p | NM_001199138 | NLRC4 | 0.01363586  | CDS |
| hsa-miR-4729    | NM_001199138 | NLRC4 | 0.000649339 | CDS |
| hsa-miR-4730    | NM_001199138 | NLRC4 | 0.002648495 | CDS |
| hsa-miR-4731-5p | NM_001199138 | NLRC4 | 0.001014772 | CDS |
| hsa-miR-4731-3p | NM_001199138 | NLRC4 | 0.04467349  | CDS |
| hsa-miR-4731-3p | NM_001199138 | NLRC4 | 2.79E-05    | CDS |
| hsa-miR-4732-3p | NM_001199138 | NLRC4 | 0.001218159 | CDS |
| hsa-miR-4732-3p | NM_001199138 | NLRC4 | 0.000166253 | CDS |
| hsa-miR-4732-3p | NM_001199138 | NLRC4 | 1.82E-06    | CDS |
| hsa-miR-4733-3p | NM_001199138 | NLRC4 | 0.000137166 | CDS |
| hsa-miR-4733-3p | NM_001199138 | NLRC4 | 2.23E-07    | CDS |
| hsa-miR-4734    | NM_001199138 | NLRC4 | 2.92E-05    | CDS |
| hsa-miR-4734    | NM_001199138 | NLRC4 | 2.27E-06    | CDS |
| hsa-miR-4736    | NM_001199138 | NLRC4 | 4.05E-05    | CDS |
| hsa-miR-4736    | NM_001199138 | NLRC4 | 0.000110757 | CDS |



|                 |              |       |             |      |
|-----------------|--------------|-------|-------------|------|
| hsa-miR-4736    | NM_001199138 | NLRC4 | 0.01837384  | CDS  |
| hsa-miR-4737    | NM_001199138 | NLRC4 | 9.35E-05    | CDS  |
| hsa-miR-3064-5p | NM_001199138 | NLRC4 | 1.70E-05    | CDS  |
| hsa-miR-3064-5p | NM_001199138 | NLRC4 | 2.90E-06    | CDS  |
| hsa-miR-3064-3p | NM_001199138 | NLRC4 | 2.83E-05    | CDS  |
| hsa-miR-4738-5p | NM_001199138 | NLRC4 | 0.001466882 | CDS  |
| hsa-miR-4738-3p | NM_001199138 | NLRC4 | 4.41E-05    | CDS  |
| hsa-miR-4738-3p | NM_001199138 | NLRC4 | 0.01195042  | CDS  |
| hsa-miR-4738-3p | NM_001199138 | NLRC4 | 4.98E-06    | CDS  |
| hsa-miR-4739    | NM_001199138 | NLRC4 | 9.62E-07    | CDS  |
| hsa-miR-4740-5p | NM_001199138 | NLRC4 | 1.01E-05    | CDS  |
| hsa-miR-4740-5p | NM_001199138 | NLRC4 | 1.24E-05    | CDS  |
| hsa-miR-4740-3p | NM_001199138 | NLRC4 | 0.00013388  | CDS  |
| hsa-miR-4741    | NM_001199138 | NLRC4 | 3.41E-07    | CDS  |
| hsa-miR-4741    | NM_001199138 | NLRC4 | 0.000115293 | CDS  |
| hsa-miR-4741    | NM_001199138 | NLRC4 | 6.21E-05    | CDS  |
| hsa-miR-4743-5p | NM_001199138 | NLRC4 | 0.002365478 | CDS  |
| hsa-miR-4743-5p | NM_001199138 | NLRC4 | 0.001025993 | CDS  |
| hsa-miR-4743-5p | NM_001199138 | NLRC4 | 0.00043678  | CDS  |
| hsa-miR-4743-5p | NM_001199138 | NLRC4 | 1.52E-05    | 5UTR |
| hsa-miR-4743-3p | NM_001199138 | NLRC4 | 0.000455398 | CDS  |
| hsa-miR-122b-3p | NM_001199138 | NLRC4 | 6.06E-05    | CDS  |
| hsa-miR-4745-5p | NM_001199138 | NLRC4 | 1.12E-05    | CDS  |
| hsa-miR-4745-5p | NM_001199138 | NLRC4 | 0.000112833 | CDS  |
| hsa-miR-4746-5p | NM_001199138 | NLRC4 | 0.000423087 | CDS  |
| hsa-miR-4746-5p | NM_001199138 | NLRC4 | 0.006122178 | CDS  |
| hsa-miR-4746-5p | NM_001199138 | NLRC4 | 1.02E-07    | CDS  |
| hsa-miR-4746-3p | NM_001199138 | NLRC4 | 7.45E-06    | CDS  |
| hsa-miR-4746-3p | NM_001199138 | NLRC4 | 0.000233688 | CDS  |
| hsa-miR-4746-3p | NM_001199138 | NLRC4 | 0.000216501 | CDS  |
| hsa-miR-4747-5p | NM_001199138 | NLRC4 | 0.07138354  | CDS  |
| hsa-miR-4747-5p | NM_001199138 | NLRC4 | 0.000654256 | CDS  |
| hsa-miR-4747-3p | NM_001199138 | NLRC4 | 0.00037471  | CDS  |
| hsa-miR-4747-3p | NM_001199138 | NLRC4 | 3.70E-05    | CDS  |
| hsa-miR-4748    | NM_001199138 | NLRC4 | 0.0645003   | CDS  |
| hsa-miR-4748    | NM_001199138 | NLRC4 | 0.000334534 | CDS  |
| hsa-miR-4748    | NM_001199138 | NLRC4 | 0.000598122 | CDS  |
| hsa-miR-4748    | NM_001199138 | NLRC4 | 0.002871608 | CDS  |
| hsa-miR-4749-5p | NM_001199138 | NLRC4 | 8.91E-06    | CDS  |
| hsa-miR-4749-3p | NM_001199138 | NLRC4 | 7.69E-06    | CDS  |
| hsa-miR-4750-5p | NM_001199138 | NLRC4 | 0.000211789 | CDS  |
| hsa-miR-4750-5p | NM_001199138 | NLRC4 | 0.02675239  | CDS  |
| hsa-miR-4750-3p | NM_001199138 | NLRC4 | 7.91E-05    | CDS  |
| hsa-miR-4751    | NM_001199138 | NLRC4 | 4.90E-05    | CDS  |

|                 |              |       |             |      |
|-----------------|--------------|-------|-------------|------|
| hsa-miR-4751    | NM_001199138 | NLRC4 | 0.000521544 | CDS  |
| hsa-miR-4751    | NM_001199138 | NLRC4 | 0.000122342 | CDS  |
| hsa-miR-4751    | NM_001199138 | NLRC4 | 0.005514936 | CDS  |
| hsa-miR-4753-5p | NM_001199138 | NLRC4 | 0.000137416 | CDS  |
| hsa-miR-4754    | NM_001199138 | NLRC4 | 0.000150393 | CDS  |
| hsa-miR-4754    | NM_001199138 | NLRC4 | 0.03273842  | CDS  |
| hsa-miR-4754    | NM_001199138 | NLRC4 | 5.45E-06    | CDS  |
| hsa-miR-4755-5p | NM_001199138 | NLRC4 | 2.02E-05    | CDS  |
| hsa-miR-4755-5p | NM_001199138 | NLRC4 | 4.27E-05    | CDS  |
| hsa-miR-4755-5p | NM_001199138 | NLRC4 | 0.008762609 | CDS  |
| hsa-miR-4755-3p | NM_001199138 | NLRC4 | 0.00043678  | CDS  |
| hsa-miR-4755-3p | NM_001199138 | NLRC4 | 4.03E-05    | CDS  |
| hsa-miR-4755-3p | NM_001199138 | NLRC4 | 6.15E-05    | CDS  |
| hsa-miR-499b-3p | NM_001199138 | NLRC4 | 0.006950725 | CDS  |
| hsa-miR-4756-5p | NM_001199138 | NLRC4 | 0.002757107 | CDS  |
| hsa-miR-4756-5p | NM_001199138 | NLRC4 | 6.44E-05    | CDS  |
| hsa-miR-4757-5p | NM_001199138 | NLRC4 | 0.002426029 | CDS  |
| hsa-miR-4757-5p | NM_001199138 | NLRC4 | 0.000740642 | CDS  |
| hsa-miR-4757-3p | NM_001199138 | NLRC4 | 0.05756387  | CDS  |
| hsa-miR-4757-3p | NM_001199138 | NLRC4 | 0.02112696  | 5UTR |
| hsa-miR-4758-5p | NM_001199138 | NLRC4 | 0.000855203 | CDS  |
| hsa-miR-4758-5p | NM_001199138 | NLRC4 | 0.000570492 | CDS  |
| hsa-miR-4758-5p | NM_001199138 | NLRC4 | 0.03129093  | CDS  |
| hsa-miR-4758-5p | NM_001199138 | NLRC4 | 8.75E-06    | CDS  |
| hsa-miR-4758-3p | NM_001199138 | NLRC4 | 6.41E-06    | CDS  |
| hsa-miR-4761-3p | NM_001199138 | NLRC4 | 0.002744589 | CDS  |
| hsa-miR-4761-3p | NM_001199138 | NLRC4 | 0.000207579 | CDS  |
| hsa-miR-4762-3p | NM_001199138 | NLRC4 | 0.000102364 | 5UTR |
| hsa-miR-4763-5p | NM_001199138 | NLRC4 | 0.000167343 | CDS  |
| hsa-miR-4763-5p | NM_001199138 | NLRC4 | 2.98E-05    | CDS  |
| hsa-miR-4763-3p | NM_001199138 | NLRC4 | 1.00E-06    | CDS  |
| hsa-miR-4763-3p | NM_001199138 | NLRC4 | 0.00092503  | CDS  |
| hsa-miR-4764-5p | NM_001199138 | NLRC4 | 0.01924989  | CDS  |
| hsa-miR-4766-5p | NM_001199138 | NLRC4 | 0.006869599 | CDS  |
| hsa-miR-4766-3p | NM_001199138 | NLRC4 | 0.000722043 | 5UTR |
| hsa-miR-4767    | NM_001199138 | NLRC4 | 0.001033441 | CDS  |
| hsa-miR-4767    | NM_001199138 | NLRC4 | 7.08E-06    | CDS  |
| hsa-miR-4767    | NM_001199138 | NLRC4 | 2.92E-05    | CDS  |
| hsa-miR-4768-3p | NM_001199138 | NLRC4 | 0.01479238  | CDS  |
| hsa-miR-4769-5p | NM_001199138 | NLRC4 | 0.01730902  | CDS  |
| hsa-miR-4769-5p | NM_001199138 | NLRC4 | 2.51E-05    | CDS  |
| hsa-miR-4769-3p | NM_001199138 | NLRC4 | 0.007691023 | CDS  |
| hsa-miR-4771    | NM_001199138 | NLRC4 | 2.01E-05    | CDS  |
| hsa-miR-4776-3p | NM_001199138 | NLRC4 | 4.84E-07    | CDS  |

|                  |              |       |             |      |
|------------------|--------------|-------|-------------|------|
| hsa-miR-4776-3p  | NM_001199138 | NLRC4 | 1.35E-05    | CDS  |
| hsa-miR-4777-3p  | NM_001199138 | NLRC4 | 7.01E-06    | CDS  |
| hsa-miR-4778-3p  | NM_001199138 | NLRC4 | 6.20E-07    | CDS  |
| hsa-miR-4436b-5p | NM_001199138 | NLRC4 | 8.86E-07    | CDS  |
| hsa-miR-4436b-3p | NM_001199138 | NLRC4 | 0.000100105 | CDS  |
| hsa-miR-4436b-3p | NM_001199138 | NLRC4 | 6.00E-06    | CDS  |
| hsa-miR-4436b-3p | NM_001199138 | NLRC4 | 0.000671559 | CDS  |
| hsa-miR-4781-5p  | NM_001199138 | NLRC4 | 0.003523479 | 5UTR |
| hsa-miR-4781-5p  | NM_001199138 | NLRC4 | 0.000217711 | CDS  |
| hsa-miR-4781-5p  | NM_001199138 | NLRC4 | 7.38E-06    | CDS  |
| hsa-miR-4781-3p  | NM_001199138 | NLRC4 | 0.01363586  | CDS  |
| hsa-miR-4781-3p  | NM_001199138 | NLRC4 | 0.000406814 | CDS  |
| hsa-miR-4783-5p  | NM_001199138 | NLRC4 | 1.39E-05    | CDS  |
| hsa-miR-4783-3p  | NM_001199138 | NLRC4 | 1.12E-05    | CDS  |
| hsa-miR-4784     | NM_001199138 | NLRC4 | 0.00085614  | CDS  |
| hsa-miR-4784     | NM_001199138 | NLRC4 | 0.007362526 | CDS  |
| hsa-miR-4785     | NM_001199138 | NLRC4 | 3.99E-05    | CDS  |
| hsa-miR-1245b-5p | NM_001199138 | NLRC4 | 0.004854961 | CDS  |
| hsa-miR-1245b-3p | NM_001199138 | NLRC4 | 2.47E-05    | CDS  |
| hsa-miR-2467-5p  | NM_001199138 | NLRC4 | 6.17E-06    | CDS  |
| hsa-miR-2467-3p  | NM_001199138 | NLRC4 | 1.00E-06    | CDS  |
| hsa-miR-2467-3p  | NM_001199138 | NLRC4 | 0.000217711 | CDS  |
| hsa-miR-4786-5p  | NM_001199138 | NLRC4 | 0.01000834  | CDS  |
| hsa-miR-4786-5p  | NM_001199138 | NLRC4 | 0.005280519 | 5UTR |
| hsa-miR-4786-5p  | NM_001199138 | NLRC4 | 0.000271137 | CDS  |
| hsa-miR-4786-3p  | NM_001199138 | NLRC4 | 5.34E-05    | CDS  |
| hsa-miR-4787-5p  | NM_001199138 | NLRC4 | 1.77E-06    | CDS  |
| hsa-miR-4787-5p  | NM_001199138 | NLRC4 | 0.00091255  | CDS  |
| hsa-miR-4787-3p  | NM_001199138 | NLRC4 | 1.28E-06    | CDS  |
| hsa-miR-4787-3p  | NM_001199138 | NLRC4 | 0.000167343 | CDS  |
| hsa-miR-4788     | NM_001199138 | NLRC4 | 0.000952318 | CDS  |
| hsa-miR-4788     | NM_001199138 | NLRC4 | 0.003190413 | CDS  |
| hsa-miR-4793-5p  | NM_001199138 | NLRC4 | 3.57E-05    | CDS  |
| hsa-miR-4793-5p  | NM_001199138 | NLRC4 | 6.20E-07    | CDS  |
| hsa-miR-4793-3p  | NM_001199138 | NLRC4 | 0.005380517 | CDS  |
| hsa-miR-4793-3p  | NM_001199138 | NLRC4 | 7.69E-05    | CDS  |
| hsa-miR-4796-3p  | NM_001199138 | NLRC4 | 0.02398038  | CDS  |
| hsa-miR-4799-5p  | NM_001199138 | NLRC4 | 9.02E-06    | CDS  |
| hsa-miR-4799-3p  | NM_001199138 | NLRC4 | 0.000169986 | CDS  |
| hsa-miR-4799-3p  | NM_001199138 | NLRC4 | 2.13E-05    | CDS  |
| hsa-miR-4800-5p  | NM_001199138 | NLRC4 | 0.01730902  | CDS  |
| hsa-miR-4800-5p  | NM_001199138 | NLRC4 | 0.000153631 | CDS  |
| hsa-miR-4800-5p  | NM_001199138 | NLRC4 | 0.02308038  | CDS  |
| hsa-miR-4800-3p  | NM_001199138 | NLRC4 | 0.002274012 | CDS  |

|                 |              |       |             |      |
|-----------------|--------------|-------|-------------|------|
| hsa-miR-4802-5p | NM_001199138 | NLRC4 | 5.97E-06    | CDS  |
| hsa-miR-4802-3p | NM_001199138 | NLRC4 | 0.001044935 | CDS  |
| hsa-miR-4999-5p | NM_001199138 | NLRC4 | 6.94E-05    | CDS  |
| hsa-miR-5000-3p | NM_001199138 | NLRC4 | 0.01519719  | CDS  |
| hsa-miR-5000-3p | NM_001199138 | NLRC4 | 2.73E-06    | CDS  |
| hsa-miR-5001-5p | NM_001199138 | NLRC4 | 0.000608953 | CDS  |
| hsa-miR-5001-5p | NM_001199138 | NLRC4 | 0.00151455  | CDS  |
| hsa-miR-5001-5p | NM_001199138 | NLRC4 | 9.02E-05    | CDS  |
| hsa-miR-5001-5p | NM_001199138 | NLRC4 | 0.000135859 | CDS  |
| hsa-miR-5001-3p | NM_001199138 | NLRC4 | 0.06177347  | CDS  |
| hsa-miR-5002-5p | NM_001199138 | NLRC4 | 2.73E-06    | CDS  |
| hsa-miR-5002-5p | NM_001199138 | NLRC4 | 0.01201202  | CDS  |
| hsa-miR-5002-5p | NM_001199138 | NLRC4 | 0.005266164 | CDS  |
| hsa-miR-5003-3p | NM_001199138 | NLRC4 | 0.004422789 | CDS  |
| hsa-miR-5003-3p | NM_001199138 | NLRC4 | 0.07786144  | 5UTR |
| hsa-miR-5004-5p | NM_001199138 | NLRC4 | 0.000478711 | CDS  |
| hsa-miR-5004-3p | NM_001199138 | NLRC4 | 0.000158814 | CDS  |
| hsa-miR-5006-5p | NM_001199138 | NLRC4 | 2.23E-07    | CDS  |
| hsa-miR-5006-5p | NM_001199138 | NLRC4 | 0.002472386 | CDS  |
| hsa-miR-5006-3p | NM_001199138 | NLRC4 | 0.000199878 | CDS  |
| hsa-miR-5006-3p | NM_001199138 | NLRC4 | 0.000143515 | CDS  |
| hsa-miR-5006-3p | NM_001199138 | NLRC4 | 3.03E-05    | CDS  |
| hsa-miR-5007-5p | NM_001199138 | NLRC4 | 2.19E-05    | 5UTR |
| hsa-miR-5008-5p | NM_001199138 | NLRC4 | 7.01E-06    | CDS  |
| hsa-miR-5008-5p | NM_001199138 | NLRC4 | 7.19E-05    | CDS  |
| hsa-miR-5008-3p | NM_001199138 | NLRC4 | 0.000381964 | CDS  |
| hsa-miR-5008-3p | NM_001199138 | NLRC4 | 4.54E-05    | CDS  |
| hsa-miR-5009-5p | NM_001199138 | NLRC4 | 0.003596187 | CDS  |
| hsa-miR-5009-5p | NM_001199138 | NLRC4 | 0.1011718   | CDS  |
| hsa-miR-5010-5p | NM_001199138 | NLRC4 | 0.000598122 | CDS  |
| hsa-miR-5010-3p | NM_001199138 | NLRC4 | 0.00033047  | CDS  |
| hsa-miR-5010-3p | NM_001199138 | NLRC4 | 0.01672155  | CDS  |
| hsa-miR-5011-5p | NM_001199138 | NLRC4 | 5.03E-05    | CDS  |
| hsa-miR-5047    | NM_001199138 | NLRC4 | 1.12E-06    | CDS  |
| hsa-miR-5047    | NM_001199138 | NLRC4 | 0.000170577 | CDS  |
| hsa-miR-5047    | NM_001199138 | NLRC4 | 0.002488019 | CDS  |
| hsa-miR-5087    | NM_001199138 | NLRC4 | 5.85E-06    | CDS  |
| hsa-miR-5087    | NM_001199138 | NLRC4 | 0.001750774 | CDS  |
| hsa-miR-5088-5p | NM_001199138 | NLRC4 | 0.0645003   | CDS  |
| hsa-miR-5088-5p | NM_001199138 | NLRC4 | 0.000671559 | CDS  |
| hsa-miR-5088-3p | NM_001199138 | NLRC4 | 6.44E-07    | CDS  |
| hsa-miR-5089-5p | NM_001199138 | NLRC4 | 0.01718499  | CDS  |
| hsa-miR-5089-5p | NM_001199138 | NLRC4 | 0.000743386 | CDS  |
| hsa-miR-5090    | NM_001199138 | NLRC4 | 1.92E-06    | CDS  |

|                  |              |       |             |      |
|------------------|--------------|-------|-------------|------|
| hsa-miR-5090     | NM_001199138 | NLRC4 | 0.00210636  | CDS  |
| hsa-miR-5090     | NM_001199138 | NLRC4 | 4.98E-06    | CDS  |
| hsa-miR-5091     | NM_001199138 | NLRC4 | 0.002114959 | CDS  |
| hsa-miR-5091     | NM_001199138 | NLRC4 | 0.002762722 | 5UTR |
| hsa-miR-5091     | NM_001199138 | NLRC4 | 0.000161338 | CDS  |
| hsa-miR-5092     | NM_001199138 | NLRC4 | 0.000140506 | CDS  |
| hsa-miR-5093     | NM_001199138 | NLRC4 | 0.000113783 | CDS  |
| hsa-miR-5094     | NM_001199138 | NLRC4 | 0.01642638  | 5UTR |
| hsa-miR-5187-5p  | NM_001199138 | NLRC4 | 0.01330528  | CDS  |
| hsa-miR-5187-5p  | NM_001199138 | NLRC4 | 0.03602765  | CDS  |
| hsa-miR-5187-5p  | NM_001199138 | NLRC4 | 0.00086116  | CDS  |
| hsa-miR-5188     | NM_001199138 | NLRC4 | 0.000226722 | CDS  |
| hsa-miR-5188     | NM_001199138 | NLRC4 | 0.001937031 | CDS  |
| hsa-miR-5189-5p  | NM_001199138 | NLRC4 | 8.80E-06    | CDS  |
| hsa-miR-5190     | NM_001199138 | NLRC4 | 3.50E-05    | CDS  |
| hsa-miR-5190     | NM_001199138 | NLRC4 | 6.67E-05    | CDS  |
| hsa-miR-5191     | NM_001199138 | NLRC4 | 0.000642323 | CDS  |
| hsa-miR-5192     | NM_001199138 | NLRC4 | 0.001815418 | CDS  |
| hsa-miR-5192     | NM_001199138 | NLRC4 | 6.14E-05    | CDS  |
| hsa-miR-5193     | NM_001199138 | NLRC4 | 0.000244245 | CDS  |
| hsa-miR-5193     | NM_001199138 | NLRC4 | 0.000106281 | CDS  |
| hsa-miR-5194     | NM_001199138 | NLRC4 | 3.48E-05    | CDS  |
| hsa-miR-5194     | NM_001199138 | NLRC4 | 2.28E-05    | CDS  |
| hsa-miR-5195-5p  | NM_001199138 | NLRC4 | 0.000653259 | CDS  |
| hsa-miR-5195-3p  | NM_001199138 | NLRC4 | 0.000423087 | CDS  |
| hsa-miR-5195-3p  | NM_001199138 | NLRC4 | 0.01168507  | 5UTR |
| hsa-miR-5195-3p  | NM_001199138 | NLRC4 | 5.71E-06    | CDS  |
| hsa-miR-5196-5p  | NM_001199138 | NLRC4 | 0.07138354  | CDS  |
| hsa-miR-5196-5p  | NM_001199138 | NLRC4 | 0.009044755 | CDS  |
| hsa-miR-4524b-3p | NM_001199138 | NLRC4 | 0.001742576 | CDS  |
| hsa-miR-5571-5p  | NM_001199138 | NLRC4 | 0.000447908 | CDS  |
| hsa-miR-5571-3p  | NM_001199138 | NLRC4 | 0.000535268 | CDS  |
| hsa-miR-5571-3p  | NM_001199138 | NLRC4 | 5.23E-05    | CDS  |
| hsa-miR-5571-3p  | NM_001199138 | NLRC4 | 0.000245493 | CDS  |
| hsa-miR-5100     | NM_001199138 | NLRC4 | 6.65E-06    | CDS  |
| hsa-miR-5100     | NM_001199138 | NLRC4 | 0.01235071  | 5UTR |
| hsa-miR-5572     | NM_001199138 | NLRC4 | 1.28E-06    | CDS  |
| hsa-miR-548as-5p | NM_001199138 | NLRC4 | 0.0527194   | CDS  |
| hsa-miR-664b-5p  | NM_001199138 | NLRC4 | 0.0645003   | CDS  |
| hsa-miR-664b-5p  | NM_001199138 | NLRC4 | 0.006459822 | CDS  |
| hsa-miR-664b-5p  | NM_001199138 | NLRC4 | 0.005609759 | CDS  |
| hsa-miR-664b-3p  | NM_001199138 | NLRC4 | 0.001002627 | CDS  |
| hsa-miR-5580-5p  | NM_001199138 | NLRC4 | 0.01623033  | CDS  |
| hsa-miR-5580-3p  | NM_001199138 | NLRC4 | 0.000161927 | CDS  |

|                  |              |       |             |     |
|------------------|--------------|-------|-------------|-----|
| hsa-miR-5581-5p  | NM_001199138 | NLRC4 | 7.95E-06    | CDS |
| hsa-miR-5581-3p  | NM_001199138 | NLRC4 | 0.000245493 | CDS |
| hsa-miR-5584-3p  | NM_001199138 | NLRC4 | 0.008149687 | CDS |
| hsa-miR-5584-3p  | NM_001199138 | NLRC4 | 0.000255514 | CDS |
| hsa-miR-5586-3p  | NM_001199138 | NLRC4 | 9.68E-05    | CDS |
| hsa-miR-5587-5p  | NM_001199138 | NLRC4 | 0.001064408 | CDS |
| hsa-miR-5587-3p  | NM_001199138 | NLRC4 | 1.98E-07    | CDS |
| hsa-miR-548au-3p | NM_001199138 | NLRC4 | 0.001413947 | CDS |
| hsa-miR-548au-3p | NM_001199138 | NLRC4 | 1.51E-05    | CDS |
| hsa-miR-1295b-5p | NM_001199138 | NLRC4 | 0.00329055  | CDS |
| hsa-miR-1295b-5p | NM_001199138 | NLRC4 | 0.000105358 | CDS |
| hsa-miR-1295b-3p | NM_001199138 | NLRC4 | 0.001742576 | CDS |
| hsa-miR-1295b-3p | NM_001199138 | NLRC4 | 0.01837384  | CDS |
| hsa-miR-5588-5p  | NM_001199138 | NLRC4 | 0.00085614  | CDS |
| hsa-miR-5588-5p  | NM_001199138 | NLRC4 | 8.77E-05    | CDS |
| hsa-miR-5588-5p  | NM_001199138 | NLRC4 | 0.003092163 | CDS |
| hsa-miR-5589-5p  | NM_001199138 | NLRC4 | 2.92E-05    | CDS |
| hsa-miR-5589-5p  | NM_001199138 | NLRC4 | 0.01201202  | CDS |
| hsa-miR-5589-3p  | NM_001199138 | NLRC4 | 0.000196593 | CDS |
| hsa-miR-5591-5p  | NM_001199138 | NLRC4 | 0.00237631  | CDS |
| hsa-miR-5591-3p  | NM_001199138 | NLRC4 | 0.00014298  | CDS |
| hsa-miR-5591-3p  | NM_001199138 | NLRC4 | 0.000108131 | CDS |
| hsa-miR-5680     | NM_001199138 | NLRC4 | 0.000406814 | CDS |
| hsa-miR-5682     | NM_001199138 | NLRC4 | 0.006362695 | CDS |
| hsa-miR-5683     | NM_001199138 | NLRC4 | 0.05000297  | CDS |
| hsa-miR-5684     | NM_001199138 | NLRC4 | 0.03362553  | CDS |
| hsa-miR-548ax    | NM_001199138 | NLRC4 | 0.005707855 | CDS |
| hsa-miR-5685     | NM_001199138 | NLRC4 | 1.14E-07    | CDS |
| hsa-miR-5685     | NM_001199138 | NLRC4 | 1.46E-05    | CDS |
| hsa-miR-5687     | NM_001199138 | NLRC4 | 0.01339061  | CDS |
| hsa-miR-5687     | NM_001199138 | NLRC4 | 0.001447161 | CDS |
| hsa-miR-5681b    | NM_001199138 | NLRC4 | 0.000238043 | CDS |
| hsa-miR-5689     | NM_001199138 | NLRC4 | 6.37E-06    | CDS |
| hsa-miR-5691     | NM_001199138 | NLRC4 | 9.46E-05    | CDS |
| hsa-miR-5691     | NM_001199138 | NLRC4 | 0.00111785  | CDS |
| hsa-miR-5696     | NM_001199138 | NLRC4 | 0.03362553  | CDS |
| hsa-miR-5698     | NM_001199138 | NLRC4 | 0.001014646 | CDS |
| hsa-miR-5698     | NM_001199138 | NLRC4 | 9.02E-05    | CDS |
| hsa-miR-5699-5p  | NM_001199138 | NLRC4 | 0.000196593 | CDS |
| hsa-miR-5699-3p  | NM_001199138 | NLRC4 | 0.000244245 | CDS |
| hsa-miR-5699-3p  | NM_001199138 | NLRC4 | 0.000721914 | CDS |
| hsa-miR-5699-3p  | NM_001199138 | NLRC4 | 0.000542111 | CDS |
| hsa-miR-5702     | NM_001199138 | NLRC4 | 4.83E-05    | CDS |
| hsa-miR-5703     | NM_001199138 | NLRC4 | 0.0264118   | CDS |

|                 |              |       |             |      |
|-----------------|--------------|-------|-------------|------|
| hsa-miR-5705    | NM_001199138 | NLRC4 | 0.02402248  | CDS  |
| hsa-miR-5705    | NM_001199138 | NLRC4 | 4.42E-05    | CDS  |
| hsa-miR-5705    | NM_001199138 | NLRC4 | 2.68E-06    | CDS  |
| hsa-miR-5706    | NM_001199138 | NLRC4 | 0.000228869 | CDS  |
| hsa-miR-5706    | NM_001199138 | NLRC4 | 0.02787945  | CDS  |
| hsa-miR-5739    | NM_001199138 | NLRC4 | 0.0361666   | CDS  |
| hsa-miR-5787    | NM_001199138 | NLRC4 | 3.41E-07    | CDS  |
| hsa-miR-5787    | NM_001199138 | NLRC4 | 0.000671559 | CDS  |
| hsa-miR-5787    | NM_001199138 | NLRC4 | 0.1188673   | CDS  |
| hsa-miR-5787    | NM_001199138 | NLRC4 | 9.76E-05    | CDS  |
| hsa-miR-1199-5p | NM_001199138 | NLRC4 | 4.98E-06    | CDS  |
| hsa-miR-1199-5p | NM_001199138 | NLRC4 | 8.56E-06    | CDS  |
| hsa-miR-1199-3p | NM_001199138 | NLRC4 | 6.41E-06    | CDS  |
| hsa-miR-1199-3p | NM_001199138 | NLRC4 | 0.006223583 | CDS  |
| hsa-miR-6068    | NM_001199138 | NLRC4 | 5.25E-05    | CDS  |
| hsa-miR-6068    | NM_001199138 | NLRC4 | 0.003518183 | CDS  |
| hsa-miR-6069    | NM_001199138 | NLRC4 | 3.41E-07    | CDS  |
| hsa-miR-6070    | NM_001199138 | NLRC4 | 0.005266164 | CDS  |
| hsa-miR-6070    | NM_001199138 | NLRC4 | 2.42E-06    | CDS  |
| hsa-miR-6070    | NM_001199138 | NLRC4 | 4.98E-06    | CDS  |
| hsa-miR-6071    | NM_001199138 | NLRC4 | 0.01228754  | CDS  |
| hsa-miR-6071    | NM_001199138 | NLRC4 | 2.94E-05    | CDS  |
| hsa-miR-6072    | NM_001199138 | NLRC4 | 0.000211512 | CDS  |
| hsa-miR-6074    | NM_001199138 | NLRC4 | 1.92E-05    | CDS  |
| hsa-miR-6075    | NM_001199138 | NLRC4 | 1.14E-07    | CDS  |
| hsa-miR-6076    | NM_001199138 | NLRC4 | 0.002263662 | CDS  |
| hsa-miR-6077    | NM_001199138 | NLRC4 | 2.11E-05    | CDS  |
| hsa-miR-6077    | NM_001199138 | NLRC4 | 0.003385126 | CDS  |
| hsa-miR-6078    | NM_001199138 | NLRC4 | 1.46E-05    | CDS  |
| hsa-miR-6080    | NM_001199138 | NLRC4 | 0.003505388 | CDS  |
| hsa-miR-6081    | NM_001199138 | NLRC4 | 1.78E-05    | 5UTR |
| hsa-miR-6081    | NM_001199138 | NLRC4 | 0.000161338 | CDS  |
| hsa-miR-6083    | NM_001199138 | NLRC4 | 0.04526314  | CDS  |
| hsa-miR-6084    | NM_001199138 | NLRC4 | 8.36E-06    | CDS  |
| hsa-miR-6084    | NM_001199138 | NLRC4 | 1.12E-05    | CDS  |
| hsa-miR-6085    | NM_001199138 | NLRC4 | 9.62E-07    | CDS  |
| hsa-miR-6085    | NM_001199138 | NLRC4 | 0.000598122 | CDS  |
| hsa-miR-6086    | NM_001199138 | NLRC4 | 0.08822971  | CDS  |
| hsa-miR-6086    | NM_001199138 | NLRC4 | 0.004035133 | CDS  |
| hsa-miR-6088    | NM_001199138 | NLRC4 | 0.03183273  | CDS  |
| hsa-miR-6088    | NM_001199138 | NLRC4 | 0.001645489 | CDS  |
| hsa-miR-6089    | NM_001199138 | NLRC4 | 0.01176218  | CDS  |
| hsa-miR-6090    | NM_001199138 | NLRC4 | 0.001239845 | CDS  |
| hsa-miR-6124    | NM_001199138 | NLRC4 | 0.000671559 | CDS  |

|                  |              |       |             |      |
|------------------|--------------|-------|-------------|------|
| hsa-miR-6125     | NM_001199138 | NLRC4 | 0.08871414  | CDS  |
| hsa-miR-6125     | NM_001199138 | NLRC4 | 0.0264118   | CDS  |
| hsa-miR-6126     | NM_001199138 | NLRC4 | 5.54E-06    | CDS  |
| hsa-miR-6127     | NM_001199138 | NLRC4 | 0.004639071 | CDS  |
| hsa-miR-6127     | NM_001199138 | NLRC4 | 0.04749199  | CDS  |
| hsa-miR-378j     | NM_001199138 | NLRC4 | 0.00721524  | CDS  |
| hsa-miR-378j     | NM_001199138 | NLRC4 | 0.003596187 | CDS  |
| hsa-miR-6129     | NM_001199138 | NLRC4 | 2.09E-06    | CDS  |
| hsa-miR-6129     | NM_001199138 | NLRC4 | 0.06687653  | CDS  |
| hsa-miR-6131     | NM_001199138 | NLRC4 | 0.04340877  | CDS  |
| hsa-miR-6132     | NM_001199138 | NLRC4 | 0.00107409  | CDS  |
| hsa-miR-6133     | NM_001199138 | NLRC4 | 0.0268879   | CDS  |
| hsa-miR-6165     | NM_001199138 | NLRC4 | 0.02245598  | CDS  |
| hsa-miR-6499-5p  | NM_001199138 | NLRC4 | 4.98E-06    | CDS  |
| hsa-miR-6499-5p  | NM_001199138 | NLRC4 | 3.41E-07    | CDS  |
| hsa-miR-6499-3p  | NM_001199138 | NLRC4 | 7.45E-06    | CDS  |
| hsa-miR-6499-3p  | NM_001199138 | NLRC4 | 0.02507925  | CDS  |
| hsa-miR-6500-5p  | NM_001199138 | NLRC4 | 3.68E-05    | CDS  |
| hsa-miR-6500-5p  | NM_001199138 | NLRC4 | 0.005855153 | CDS  |
| hsa-miR-6500-3p  | NM_001199138 | NLRC4 | 0.000102364 | 5UTR |
| hsa-miR-6500-3p  | NM_001199138 | NLRC4 | 0.007495679 | CDS  |
| hsa-miR-6501-5p  | NM_001199138 | NLRC4 | 2.27E-06    | CDS  |
| hsa-miR-6501-3p  | NM_001199138 | NLRC4 | 7.18E-05    | CDS  |
| hsa-miR-6503-5p  | NM_001199138 | NLRC4 | 0.002426029 | CDS  |
| hsa-miR-6503-5p  | NM_001199138 | NLRC4 | 0.00037471  | CDS  |
| hsa-miR-6503-5p  | NM_001199138 | NLRC4 | 0.02651416  | CDS  |
| hsa-miR-6503-3p  | NM_001199138 | NLRC4 | 0.01408661  | CDS  |
| hsa-miR-6503-3p  | NM_001199138 | NLRC4 | 0.000571804 | CDS  |
| hsa-miR-6504-5p  | NM_001199138 | NLRC4 | 2.19E-05    | 5UTR |
| hsa-miR-6505-5p  | NM_001199138 | NLRC4 | 0.001481713 | CDS  |
| hsa-miR-6505-5p  | NM_001199138 | NLRC4 | 0.001028636 | CDS  |
| hsa-miR-6505-3p  | NM_001199138 | NLRC4 | 0.00085614  | CDS  |
| hsa-miR-6506-5p  | NM_001199138 | NLRC4 | 0.000109036 | CDS  |
| hsa-miR-6507-3p  | NM_001199138 | NLRC4 | 0.002052023 | CDS  |
| hsa-miR-6509-5p  | NM_001199138 | NLRC4 | 0.000578387 | CDS  |
| hsa-miR-6509-5p  | NM_001199138 | NLRC4 | 0.005273831 | CDS  |
| hsa-miR-6509-3p  | NM_001199138 | NLRC4 | 1.12E-05    | CDS  |
| hsa-miR-6510-5p  | NM_001199138 | NLRC4 | 1.00E-06    | CDS  |
| hsa-miR-6510-5p  | NM_001199138 | NLRC4 | 0.002263662 | CDS  |
| hsa-miR-6510-3p  | NM_001199138 | NLRC4 | 0.00329055  | CDS  |
| hsa-miR-6511a-5p | NM_001199138 | NLRC4 | 0.1067239   | CDS  |
| hsa-miR-6511a-5p | NM_001199138 | NLRC4 | 0.002224226 | CDS  |
| hsa-miR-6511a-5p | NM_001199138 | NLRC4 | 0.004487638 | CDS  |
| hsa-miR-6511a-3p | NM_001199138 | NLRC4 | 0.000119651 | CDS  |



|                  |              |       |             |     |
|------------------|--------------|-------|-------------|-----|
| hsa-miR-6512-5p  | NM_001199138 | NLRC4 | 0.005857131 | CDS |
| hsa-miR-6512-3p  | NM_001199138 | NLRC4 | 6.26E-05    | CDS |
| hsa-miR-6513-5p  | NM_001199138 | NLRC4 | 0.000592353 | CDS |
| hsa-miR-6514-5p  | NM_001199138 | NLRC4 | 4.95E-07    | CDS |
| hsa-miR-6514-5p  | NM_001199138 | NLRC4 | 0.00034557  | CDS |
| hsa-miR-6514-3p  | NM_001199138 | NLRC4 | 7.91E-05    | CDS |
| hsa-miR-6515-5p  | NM_001199138 | NLRC4 | 0.08288526  | CDS |
| hsa-miR-6515-5p  | NM_001199138 | NLRC4 | 0.05383761  | CDS |
| hsa-miR-6515-5p  | NM_001199138 | NLRC4 | 0.02468582  | CDS |
| hsa-miR-6715b-5p | NM_001199138 | NLRC4 | 0.001170791 | CDS |
| hsa-miR-6716-5p  | NM_001199138 | NLRC4 | 0.08882998  | CDS |
| hsa-miR-6716-5p  | NM_001199138 | NLRC4 | 0.00086116  | CDS |
| hsa-miR-6716-3p  | NM_001199138 | NLRC4 | 0.000645151 | CDS |
| hsa-miR-6717-5p  | NM_001199138 | NLRC4 | 6.20E-05    | CDS |
| hsa-miR-6511b-5p | NM_001199138 | NLRC4 | 0.1399983   | CDS |
| hsa-miR-6511b-5p | NM_001199138 | NLRC4 | 0.000211789 | CDS |
| hsa-miR-6511b-5p | NM_001199138 | NLRC4 | 7.71E-05    | CDS |
| hsa-miR-6511b-5p | NM_001199138 | NLRC4 | 0.000502803 | CDS |
| hsa-miR-6718-5p  | NM_001199138 | NLRC4 | 2.65E-05    | CDS |
| hsa-miR-6718-5p  | NM_001199138 | NLRC4 | 0.000618    | CDS |
| hsa-miR-6718-5p  | NM_001199138 | NLRC4 | 0.001064408 | CDS |
| hsa-miR-6720-5p  | NM_001199138 | NLRC4 | 1.47E-05    | CDS |
| hsa-miR-6720-3p  | NM_001199138 | NLRC4 | 0.000133333 | CDS |
| hsa-miR-6720-3p  | NM_001199138 | NLRC4 | 2.55E-05    | CDS |
| hsa-miR-6720-3p  | NM_001199138 | NLRC4 | 2.79E-05    | CDS |
| hsa-miR-6721-5p  | NM_001199138 | NLRC4 | 1.12E-05    | CDS |
| hsa-miR-6721-5p  | NM_001199138 | NLRC4 | 0.1222725   | CDS |
| hsa-miR-6722-3p  | NM_001199138 | NLRC4 | 1.19E-06    | CDS |
| hsa-miR-6724-5p  | NM_001199138 | NLRC4 | 4.98E-06    | CDS |
| hsa-miR-892c-5p  | NM_001199138 | NLRC4 | 0.1542798   | CDS |
| hsa-miR-892c-3p  | NM_001199138 | NLRC4 | 0.000120074 | CDS |
| hsa-miR-6726-5p  | NM_001199138 | NLRC4 | 3.17E-07    | CDS |
| hsa-miR-6726-5p  | NM_001199138 | NLRC4 | 0.001633284 | CDS |
| hsa-miR-6726-5p  | NM_001199138 | NLRC4 | 1.16E-05    | CDS |
| hsa-miR-6726-5p  | NM_001199138 | NLRC4 | 0.08715581  | CDS |
| hsa-miR-6726-3p  | NM_001199138 | NLRC4 | 4.84E-07    | CDS |
| hsa-miR-6726-3p  | NM_001199138 | NLRC4 | 0.000186    | CDS |
| hsa-miR-6726-3p  | NM_001199138 | NLRC4 | 0.001031207 | CDS |
| hsa-miR-6726-3p  | NM_001199138 | NLRC4 | 0.005620409 | CDS |
| hsa-miR-6727-5p  | NM_001199138 | NLRC4 | 0.00210636  | CDS |
| hsa-miR-6727-5p  | NM_001199138 | NLRC4 | 3.70E-07    | CDS |
| hsa-miR-6727-5p  | NM_001199138 | NLRC4 | 0.007047336 | CDS |
| hsa-miR-6727-3p  | NM_001199138 | NLRC4 | 0.000244245 | CDS |
| hsa-miR-6727-3p  | NM_001199138 | NLRC4 | 0.000535268 | CDS |

|                 |              |       |             |      |
|-----------------|--------------|-------|-------------|------|
| hsa-miR-6727-3p | NM_001199138 | NLRC4 | 0.001397618 | CDS  |
| hsa-miR-6728-5p | NM_001199138 | NLRC4 | 0.000834806 | CDS  |
| hsa-miR-6728-5p | NM_001199138 | NLRC4 | 0.02675239  | CDS  |
| hsa-miR-6728-3p | NM_001199138 | NLRC4 | 1.82E-05    | CDS  |
| hsa-miR-6728-3p | NM_001199138 | NLRC4 | 7.91E-05    | CDS  |
| hsa-miR-6729-5p | NM_001199138 | NLRC4 | 0.003824517 | CDS  |
| hsa-miR-6729-5p | NM_001199138 | NLRC4 | 0.000755782 | CDS  |
| hsa-miR-6729-5p | NM_001199138 | NLRC4 | 8.91E-06    | CDS  |
| hsa-miR-6729-3p | NM_001199138 | NLRC4 | 0.000259323 | CDS  |
| hsa-miR-6730-5p | NM_001199138 | NLRC4 | 0.000187316 | CDS  |
| hsa-miR-6730-5p | NM_001199138 | NLRC4 | 0.001014646 | CDS  |
| hsa-miR-6730-3p | NM_001199138 | NLRC4 | 1.65E-05    | 5UTR |
| hsa-miR-6731-5p | NM_001199138 | NLRC4 | 0.000276588 | 5UTR |
| hsa-miR-6731-5p | NM_001199138 | NLRC4 | 0.000135949 | CDS  |
| hsa-miR-6731-3p | NM_001199138 | NLRC4 | 0.008234576 | CDS  |
| hsa-miR-6731-3p | NM_001199138 | NLRC4 | 0.000259323 | CDS  |
| hsa-miR-6732-5p | NM_001199138 | NLRC4 | 0.000598122 | CDS  |
| hsa-miR-6732-5p | NM_001199138 | NLRC4 | 0.000100105 | CDS  |
| hsa-miR-6732-3p | NM_001199138 | NLRC4 | 0.009187106 | CDS  |
| hsa-miR-6733-3p | NM_001199138 | NLRC4 | 0.01519719  | CDS  |
| hsa-miR-6734-5p | NM_001199138 | NLRC4 | 0.002665851 | CDS  |
| hsa-miR-6734-3p | NM_001199138 | NLRC4 | 0.000259323 | CDS  |
| hsa-miR-6734-3p | NM_001199138 | NLRC4 | 0.000212555 | CDS  |
| hsa-miR-6735-5p | NM_001199138 | NLRC4 | 0.02185333  | CDS  |
| hsa-miR-6735-5p | NM_001199138 | NLRC4 | 0.000605168 | CDS  |
| hsa-miR-6735-3p | NM_001199138 | NLRC4 | 1.46E-05    | CDS  |
| hsa-miR-6735-3p | NM_001199138 | NLRC4 | 1.61E-05    | CDS  |
| hsa-miR-6736-5p | NM_001199138 | NLRC4 | 0.000855203 | CDS  |
| hsa-miR-6736-5p | NM_001199138 | NLRC4 | 2.10E-06    | CDS  |
| hsa-miR-6736-5p | NM_001199138 | NLRC4 | 0.001886311 | 5UTR |
| hsa-miR-6736-3p | NM_001199138 | NLRC4 | 8.09E-06    | CDS  |
| hsa-miR-6737-5p | NM_001199138 | NLRC4 | 0.01246415  | CDS  |
| hsa-miR-6737-5p | NM_001199138 | NLRC4 | 0.000384216 | CDS  |
| hsa-miR-6737-5p | NM_001199138 | NLRC4 | 0.1011718   | CDS  |
| hsa-miR-6737-3p | NM_001199138 | NLRC4 | 0.01223285  | CDS  |
| hsa-miR-6738-5p | NM_001199138 | NLRC4 | 9.62E-07    | CDS  |
| hsa-miR-6738-3p | NM_001199138 | NLRC4 | 3.81E-05    | CDS  |
| hsa-miR-6738-3p | NM_001199138 | NLRC4 | 0.000215389 | CDS  |
| hsa-miR-6739-3p | NM_001199138 | NLRC4 | 3.07E-05    | CDS  |
| hsa-miR-6740-5p | NM_001199138 | NLRC4 | 0.01730902  | CDS  |
| hsa-miR-6740-5p | NM_001199138 | NLRC4 | 0.000267696 | CDS  |
| hsa-miR-6740-5p | NM_001199138 | NLRC4 | 0.000506083 | CDS  |
| hsa-miR-6740-3p | NM_001199138 | NLRC4 | 0.1045722   | CDS  |
| hsa-miR-6740-3p | NM_001199138 | NLRC4 | 0.0109425   | CDS  |

|                 |              |       |             |     |
|-----------------|--------------|-------|-------------|-----|
| hsa-miR-6741-5p | NM_001199138 | NLRC4 | 0.000293001 | CDS |
| hsa-miR-6741-5p | NM_001199138 | NLRC4 | 0.04971988  | CDS |
| hsa-miR-6741-5p | NM_001199138 | NLRC4 | 0.00933987  | CDS |
| hsa-miR-6741-5p | NM_001199138 | NLRC4 | 0.02308038  | CDS |
| hsa-miR-6742-5p | NM_001199138 | NLRC4 | 0.06689403  | CDS |
| hsa-miR-6742-3p | NM_001199138 | NLRC4 | 0.000107277 | CDS |
| hsa-miR-6742-3p | NM_001199138 | NLRC4 | 0.001218159 | CDS |
| hsa-miR-6742-3p | NM_001199138 | NLRC4 | 0.000652497 | CDS |
| hsa-miR-6743-5p | NM_001199138 | NLRC4 | 0.000379735 | CDS |
| hsa-miR-6743-5p | NM_001199138 | NLRC4 | 0.01542657  | CDS |
| hsa-miR-6744-3p | NM_001199138 | NLRC4 | 0.001269939 | CDS |
| hsa-miR-6744-3p | NM_001199138 | NLRC4 | 0.001262872 | CDS |
| hsa-miR-6744-3p | NM_001199138 | NLRC4 | 0.000125663 | CDS |
| hsa-miR-6745    | NM_001199138 | NLRC4 | 0.008326793 | CDS |
| hsa-miR-6746-5p | NM_001199138 | NLRC4 | 4.74E-06    | CDS |
| hsa-miR-6746-5p | NM_001199138 | NLRC4 | 0.01479238  | CDS |
| hsa-miR-6746-5p | NM_001199138 | NLRC4 | 0.02837663  | CDS |
| hsa-miR-6746-3p | NM_001199138 | NLRC4 | 1.88E-05    | CDS |
| hsa-miR-6747-5p | NM_001199138 | NLRC4 | 0.03151826  | CDS |
| hsa-miR-6747-5p | NM_001199138 | NLRC4 | 0.003824517 | CDS |
| hsa-miR-6748-5p | NM_001199138 | NLRC4 | 0.009044755 | CDS |
| hsa-miR-6748-5p | NM_001199138 | NLRC4 | 0.03296809  | CDS |
| hsa-miR-6748-5p | NM_001199138 | NLRC4 | 0.000322879 | CDS |
| hsa-miR-6748-5p | NM_001199138 | NLRC4 | 0.000608953 | CDS |
| hsa-miR-6748-3p | NM_001199138 | NLRC4 | 0.009187106 | CDS |
| hsa-miR-6748-3p | NM_001199138 | NLRC4 | 0.06177347  | CDS |
| hsa-miR-6749-5p | NM_001199138 | NLRC4 | 0.000113783 | CDS |
| hsa-miR-6749-5p | NM_001199138 | NLRC4 | 7.68E-06    | CDS |
| hsa-miR-6749-5p | NM_001199138 | NLRC4 | 6.44E-07    | CDS |
| hsa-miR-6749-3p | NM_001199138 | NLRC4 | 0.000106281 | CDS |
| hsa-miR-6750-5p | NM_001199138 | NLRC4 | 6.00E-06    | CDS |
| hsa-miR-6750-5p | NM_001199138 | NLRC4 | 1.73E-05    | CDS |
| hsa-miR-6750-3p | NM_001199138 | NLRC4 | 6.90E-06    | CDS |
| hsa-miR-6751-5p | NM_001199138 | NLRC4 | 0.08241963  | CDS |
| hsa-miR-6751-5p | NM_001199138 | NLRC4 | 0.002208302 | CDS |
| hsa-miR-6751-3p | NM_001199138 | NLRC4 | 0.006712235 | CDS |
| hsa-miR-6752-5p | NM_001199138 | NLRC4 | 8.25E-06    | CDS |
| hsa-miR-6752-5p | NM_001199138 | NLRC4 | 0.000293001 | CDS |
| hsa-miR-6752-3p | NM_001199138 | NLRC4 | 0.000245493 | CDS |
| hsa-miR-6752-3p | NM_001199138 | NLRC4 | 0.000107277 | CDS |
| hsa-miR-6753-5p | NM_001199138 | NLRC4 | 7.18E-05    | CDS |
| hsa-miR-6753-3p | NM_001199138 | NLRC4 | 0.000381964 | CDS |
| hsa-miR-6754-5p | NM_001199138 | NLRC4 | 4.74E-06    | CDS |
| hsa-miR-6754-3p | NM_001199138 | NLRC4 | 0.000669213 | CDS |

|                  |              |       |             |      |
|------------------|--------------|-------|-------------|------|
| hsa-miR-6756-5p  | NM_001199138 | NLRC4 | 3.41E-07    | CDS  |
| hsa-miR-6756-3p  | NM_001199138 | NLRC4 | 0.000583201 | CDS  |
| hsa-miR-6757-5p  | NM_001199138 | NLRC4 | 0.000276588 | 5UTR |
| hsa-miR-6757-5p  | NM_001199138 | NLRC4 | 0.03151826  | CDS  |
| hsa-miR-6757-5p  | NM_001199138 | NLRC4 | 8.25E-06    | CDS  |
| hsa-miR-6757-3p  | NM_001199138 | NLRC4 | 6.05E-07    | CDS  |
| hsa-miR-6757-3p  | NM_001199138 | NLRC4 | 0.00329055  | CDS  |
| hsa-miR-6758-5p  | NM_001199138 | NLRC4 | 0.000214933 | CDS  |
| hsa-miR-6759-5p  | NM_001199138 | NLRC4 | 0.01316261  | 5UTR |
| hsa-miR-6759-3p  | NM_001199138 | NLRC4 | 0.004730357 | CDS  |
| hsa-miR-6760-5p  | NM_001199138 | NLRC4 | 4.03E-06    | CDS  |
| hsa-miR-6761-5p  | NM_001199138 | NLRC4 | 5.71E-06    | CDS  |
| hsa-miR-6761-3p  | NM_001199138 | NLRC4 | 0.004577843 | CDS  |
| hsa-miR-6761-3p  | NM_001199138 | NLRC4 | 0.000245493 | CDS  |
| hsa-miR-6762-5p  | NM_001199138 | NLRC4 | 3.17E-07    | CDS  |
| hsa-miR-6762-5p  | NM_001199138 | NLRC4 | 0.001516459 | CDS  |
| hsa-miR-6762-3p  | NM_001199138 | NLRC4 | 4.78E-06    | CDS  |
| hsa-miR-6762-3p  | NM_001199138 | NLRC4 | 5.14E-05    | CDS  |
| hsa-miR-6762-3p  | NM_001199138 | NLRC4 | 0.000963264 | CDS  |
| hsa-miR-6762-3p  | NM_001199138 | NLRC4 | 0.006628845 | CDS  |
| hsa-miR-6763-5p  | NM_001199138 | NLRC4 | 0.1399983   | CDS  |
| hsa-miR-6763-5p  | NM_001199138 | NLRC4 | 0.08241963  | CDS  |
| hsa-miR-6763-5p  | NM_001199138 | NLRC4 | 0.000511852 | CDS  |
| hsa-miR-6763-5p  | NM_001199138 | NLRC4 | 0.001372911 | CDS  |
| hsa-miR-6763-3p  | NM_001199138 | NLRC4 | 0.000106281 | CDS  |
| hsa-miR-6764-5p  | NM_001199138 | NLRC4 | 1.23E-05    | CDS  |
| hsa-miR-6764-3p  | NM_001199138 | NLRC4 | 4.79E-06    | CDS  |
| hsa-miR-6765-5p  | NM_001199138 | NLRC4 | 2.13E-05    | CDS  |
| hsa-miR-6765-5p  | NM_001199138 | NLRC4 | 0.01341104  | 5UTR |
| hsa-miR-6765-3p  | NM_001199138 | NLRC4 | 1.46E-05    | CDS  |
| hsa-miR-6765-3p  | NM_001199138 | NLRC4 | 8.53E-06    | CDS  |
| hsa-miR-6766-5p  | NM_001199138 | NLRC4 | 0.000345859 | CDS  |
| hsa-miR-6766-5p  | NM_001199138 | NLRC4 | 6.21E-05    | CDS  |
| hsa-miR-6766-3p  | NM_001199138 | NLRC4 | 0.009171114 | CDS  |
| hsa-miR-6767-5p  | NM_001199138 | NLRC4 | 0.000605168 | CDS  |
| hsa-miR-6767-5p  | NM_001199138 | NLRC4 | 6.02E-08    | CDS  |
| hsa-miR-6767-3p  | NM_001199138 | NLRC4 | 3.57E-05    | CDS  |
| hsa-miR-6767-3p  | NM_001199138 | NLRC4 | 0.001972862 | CDS  |
| hsa-miR-6767-3p  | NM_001199138 | NLRC4 | 2.88E-05    | CDS  |
| hsa-miR-6768-5p  | NM_001199138 | NLRC4 | 5.90E-05    | CDS  |
| hsa-miR-6769a-5p | NM_001199138 | NLRC4 | 0.003558933 | CDS  |
| hsa-miR-6769a-5p | NM_001199138 | NLRC4 | 0.04450285  | CDS  |
| hsa-miR-6770-5p  | NM_001199138 | NLRC4 | 0.004509441 | CDS  |
| hsa-miR-6770-3p  | NM_001199138 | NLRC4 | 1.16E-05    | CDS  |

|                  |              |       |             |      |
|------------------|--------------|-------|-------------|------|
| hsa-miR-6770-3p  | NM_001199138 | NLRC4 | 0.003473051 | CDS  |
| hsa-miR-6770-3p  | NM_001199138 | NLRC4 | 0.003651178 | CDS  |
| hsa-miR-6771-5p  | NM_001199138 | NLRC4 | 6.44E-05    | CDS  |
| hsa-miR-6771-5p  | NM_001199138 | NLRC4 | 0.001031207 | CDS  |
| hsa-miR-6772-5p  | NM_001199138 | NLRC4 | 0.000608953 | CDS  |
| hsa-miR-6772-5p  | NM_001199138 | NLRC4 | 7.36E-05    | CDS  |
| hsa-miR-6772-5p  | NM_001199138 | NLRC4 | 0.000297589 | CDS  |
| hsa-miR-6772-5p  | NM_001199138 | NLRC4 | 0.000855203 | CDS  |
| hsa-miR-6772-3p  | NM_001199138 | NLRC4 | 0.000362454 | CDS  |
| hsa-miR-6772-3p  | NM_001199138 | NLRC4 | 0.001519754 | CDS  |
| hsa-miR-6773-5p  | NM_001199138 | NLRC4 | 0.000132382 | CDS  |
| hsa-miR-6773-5p  | NM_001199138 | NLRC4 | 1.46E-05    | CDS  |
| hsa-miR-6773-5p  | NM_001199138 | NLRC4 | 2.55E-05    | CDS  |
| hsa-miR-6773-3p  | NM_001199138 | NLRC4 | 0.009187106 | CDS  |
| hsa-miR-6774-3p  | NM_001199138 | NLRC4 | 0.008234576 | CDS  |
| hsa-miR-6775-5p  | NM_001199138 | NLRC4 | 3.17E-07    | CDS  |
| hsa-miR-6775-5p  | NM_001199138 | NLRC4 | 0.000671559 | CDS  |
| hsa-miR-6775-3p  | NM_001199138 | NLRC4 | 0.00037471  | CDS  |
| hsa-miR-6776-5p  | NM_001199138 | NLRC4 | 0.2724825   | CDS  |
| hsa-miR-6776-5p  | NM_001199138 | NLRC4 | 0.08763861  | CDS  |
| hsa-miR-6776-5p  | NM_001199138 | NLRC4 | 0.005273831 | CDS  |
| hsa-miR-6777-5p  | NM_001199138 | NLRC4 | 0.0264118   | CDS  |
| hsa-miR-6777-5p  | NM_001199138 | NLRC4 | 1.49E-05    | CDS  |
| hsa-miR-6777-5p  | NM_001199138 | NLRC4 | 0.00237631  | CDS  |
| hsa-miR-6777-3p  | NM_001199138 | NLRC4 | 6.44E-07    | CDS  |
| hsa-miR-6778-5p  | NM_001199138 | NLRC4 | 0.01063915  | 5UTR |
| hsa-miR-6778-5p  | NM_001199138 | NLRC4 | 0.000345859 | CDS  |
| hsa-miR-6778-5p  | NM_001199138 | NLRC4 | 0.02308038  | CDS  |
| hsa-miR-6778-3p  | NM_001199138 | NLRC4 | 0.000196593 | CDS  |
| hsa-miR-6779-5p  | NM_001199138 | NLRC4 | 0.009056833 | CDS  |
| hsa-miR-6779-5p  | NM_001199138 | NLRC4 | 0.1399983   | CDS  |
| hsa-miR-6779-5p  | NM_001199138 | NLRC4 | 0.08241963  | CDS  |
| hsa-miR-6779-5p  | NM_001199138 | NLRC4 | 0.000135949 | CDS  |
| hsa-miR-6779-3p  | NM_001199138 | NLRC4 | 1.46E-05    | CDS  |
| hsa-miR-6779-3p  | NM_001199138 | NLRC4 | 1.61E-05    | CDS  |
| hsa-miR-6780a-5p | NM_001199138 | NLRC4 | 0.000605168 | CDS  |
| hsa-miR-6780a-3p | NM_001199138 | NLRC4 | 0.000123249 | CDS  |
| hsa-miR-6781-5p  | NM_001199138 | NLRC4 | 0.000671559 | CDS  |
| hsa-miR-6781-3p  | NM_001199138 | NLRC4 | 0.000326687 | CDS  |
| hsa-miR-6782-5p  | NM_001199138 | NLRC4 | 9.25E-07    | CDS  |
| hsa-miR-6782-3p  | NM_001199138 | NLRC4 | 0.000166253 | CDS  |
| hsa-miR-6782-3p  | NM_001199138 | NLRC4 | 0.00015002  | CDS  |
| hsa-miR-6783-5p  | NM_001199138 | NLRC4 | 0.01246415  | CDS  |
| hsa-miR-6783-5p  | NM_001199138 | NLRC4 | 0.000139508 | CDS  |

|                 |              |       |             |     |
|-----------------|--------------|-------|-------------|-----|
| hsa-miR-6783-3p | NM_001199138 | NLRC4 | 0.06177347  | CDS |
| hsa-miR-6783-3p | NM_001199138 | NLRC4 | 0.000583201 | CDS |
| hsa-miR-6784-5p | NM_001199138 | NLRC4 | 1.00E-06    | CDS |
| hsa-miR-6784-5p | NM_001199138 | NLRC4 | 6.15E-05    | CDS |
| hsa-miR-6785-5p | NM_001199138 | NLRC4 | 0.000142999 | CDS |
| hsa-miR-6785-3p | NM_001199138 | NLRC4 | 3.57E-05    | CDS |
| hsa-miR-6785-3p | NM_001199138 | NLRC4 | 0.000239915 | CDS |
| hsa-miR-6786-5p | NM_001199138 | NLRC4 | 1.85E-05    | CDS |
| hsa-miR-6786-5p | NM_001199138 | NLRC4 | 0.000724533 | CDS |
| hsa-miR-6786-5p | NM_001199138 | NLRC4 | 0.003456785 | CDS |
| hsa-miR-6786-3p | NM_001199138 | NLRC4 | 0.000542025 | CDS |
| hsa-miR-6786-3p | NM_001199138 | NLRC4 | 0.04142576  | CDS |
| hsa-miR-6787-5p | NM_001199138 | NLRC4 | 1.00E-06    | CDS |
| hsa-miR-6787-5p | NM_001199138 | NLRC4 | 9.39E-05    | CDS |
| hsa-miR-6787-5p | NM_001199138 | NLRC4 | 0.001644724 | CDS |
| hsa-miR-6787-3p | NM_001199138 | NLRC4 | 0.000913506 | CDS |
| hsa-miR-6787-3p | NM_001199138 | NLRC4 | 0.007691023 | CDS |
| hsa-miR-6787-3p | NM_001199138 | NLRC4 | 4.59E-06    | CDS |
| hsa-miR-6788-3p | NM_001199138 | NLRC4 | 0.00043678  | CDS |
| hsa-miR-6789-3p | NM_001199138 | NLRC4 | 0.00151455  | CDS |
| hsa-miR-6789-3p | NM_001199138 | NLRC4 | 0.001218159 | CDS |
| hsa-miR-6790-5p | NM_001199138 | NLRC4 | 0.08189838  | CDS |
| hsa-miR-6790-5p | NM_001199138 | NLRC4 | 0.01718499  | CDS |
| hsa-miR-6790-3p | NM_001199138 | NLRC4 | 7.68E-06    | CDS |
| hsa-miR-6791-5p | NM_001199138 | NLRC4 | 6.33E-06    | CDS |
| hsa-miR-6791-5p | NM_001199138 | NLRC4 | 7.16E-06    | CDS |
| hsa-miR-6791-5p | NM_001199138 | NLRC4 | 2.23E-07    | CDS |
| hsa-miR-6791-3p | NM_001199138 | NLRC4 | 5.25E-05    | CDS |
| hsa-miR-6791-3p | NM_001199138 | NLRC4 | 0.000612062 | CDS |
| hsa-miR-6792-5p | NM_001199138 | NLRC4 | 1.00E-06    | CDS |
| hsa-miR-6792-5p | NM_001199138 | NLRC4 | 0.000165293 | CDS |
| hsa-miR-6792-3p | NM_001199138 | NLRC4 | 0.004422789 | CDS |
| hsa-miR-6792-3p | NM_001199138 | NLRC4 | 0.000225565 | CDS |
| hsa-miR-6793-5p | NM_001199138 | NLRC4 | 0.03365704  | CDS |
| hsa-miR-6793-5p | NM_001199138 | NLRC4 | 0.0645003   | CDS |
| hsa-miR-6793-3p | NM_001199138 | NLRC4 | 8.38E-06    | CDS |
| hsa-miR-6794-5p | NM_001199138 | NLRC4 | 0.001661235 | CDS |
| hsa-miR-6795-5p | NM_001199138 | NLRC4 | 0.01000834  | CDS |
| hsa-miR-6796-5p | NM_001199138 | NLRC4 | 1.19E-06    | CDS |
| hsa-miR-6796-5p | NM_001199138 | NLRC4 | 4.42E-05    | CDS |
| hsa-miR-6796-3p | NM_001199138 | NLRC4 | 0.000963264 | CDS |
| hsa-miR-6797-5p | NM_001199138 | NLRC4 | 0.03545045  | CDS |
| hsa-miR-6797-5p | NM_001199138 | NLRC4 | 0.01069605  | CDS |
| hsa-miR-6798-5p | NM_001199138 | NLRC4 | 0.03498518  | CDS |

|                 |              |       |             |      |
|-----------------|--------------|-------|-------------|------|
| hsa-miR-6798-5p | NM_001199138 | NLRC4 | 9.25E-07    | CDS  |
| hsa-miR-6798-5p | NM_001199138 | NLRC4 | 0.008073378 | CDS  |
| hsa-miR-6798-5p | NM_001199138 | NLRC4 | 0.02352991  | CDS  |
| hsa-miR-6798-3p | NM_001199138 | NLRC4 | 0.006567177 | CDS  |
| hsa-miR-6799-5p | NM_001199138 | NLRC4 | 0.000598122 | CDS  |
| hsa-miR-6799-5p | NM_001199138 | NLRC4 | 0.02837663  | CDS  |
| hsa-miR-6799-5p | NM_001199138 | NLRC4 | 0.002556774 | 5UTR |
| hsa-miR-6799-3p | NM_001199138 | NLRC4 | 8.12E-06    | CDS  |
| hsa-miR-6799-3p | NM_001199138 | NLRC4 | 7.95E-06    | CDS  |
| hsa-miR-6799-3p | NM_001199138 | NLRC4 | 0.001202897 | CDS  |
| hsa-miR-6800-5p | NM_001199138 | NLRC4 | 1.39E-05    | CDS  |
| hsa-miR-6800-3p | NM_001199138 | NLRC4 | 0.000802077 | CDS  |
| hsa-miR-6801-5p | NM_001199138 | NLRC4 | 0.000605168 | CDS  |
| hsa-miR-6801-3p | NM_001199138 | NLRC4 | 0.000612062 | CDS  |
| hsa-miR-6801-3p | NM_001199138 | NLRC4 | 0.000196593 | CDS  |
| hsa-miR-6802-5p | NM_001199138 | NLRC4 | 0.1399983   | CDS  |
| hsa-miR-6802-5p | NM_001199138 | NLRC4 | 0.01105221  | CDS  |
| hsa-miR-6802-3p | NM_001199138 | NLRC4 | 0.008234576 | CDS  |
| hsa-miR-6802-3p | NM_001199138 | NLRC4 | 0.000612062 | CDS  |
| hsa-miR-6803-3p | NM_001199138 | NLRC4 | 0.000583201 | CDS  |
| hsa-miR-6803-3p | NM_001199138 | NLRC4 | 0.000106281 | CDS  |
| hsa-miR-6804-5p | NM_001199138 | NLRC4 | 0.001239845 | CDS  |
| hsa-miR-6804-5p | NM_001199138 | NLRC4 | 5.49E-05    | CDS  |
| hsa-miR-6804-3p | NM_001199138 | NLRC4 | 2.28E-05    | CDS  |
| hsa-miR-6805-5p | NM_001199138 | NLRC4 | 9.62E-07    | CDS  |
| hsa-miR-6805-5p | NM_001199138 | NLRC4 | 0.01250097  | CDS  |
| hsa-miR-6805-5p | NM_001199138 | NLRC4 | 0.000133333 | CDS  |
| hsa-miR-6805-5p | NM_001199138 | NLRC4 | 0.001661235 | CDS  |
| hsa-miR-6805-3p | NM_001199138 | NLRC4 | 0.04729951  | CDS  |
| hsa-miR-6806-5p | NM_001199138 | NLRC4 | 0.000235798 | CDS  |
| hsa-miR-6806-3p | NM_001199138 | NLRC4 | 1.10E-08    | CDS  |
| hsa-miR-6806-3p | NM_001199138 | NLRC4 | 0.000233688 | CDS  |
| hsa-miR-6806-3p | NM_001199138 | NLRC4 | 0.000272475 | CDS  |
| hsa-miR-6807-5p | NM_001199138 | NLRC4 | 0.001956377 | 5UTR |
| hsa-miR-6807-3p | NM_001199138 | NLRC4 | 0.01106226  | CDS  |
| hsa-miR-6807-3p | NM_001199138 | NLRC4 | 2.28E-05    | CDS  |
| hsa-miR-6807-3p | NM_001199138 | NLRC4 | 0.001519754 | CDS  |
| hsa-miR-6808-5p | NM_001199138 | NLRC4 | 0.001170791 | CDS  |
| hsa-miR-6808-5p | NM_001199138 | NLRC4 | 0.000230589 | CDS  |
| hsa-miR-6808-5p | NM_001199138 | NLRC4 | 1.54E-05    | CDS  |
| hsa-miR-6808-3p | NM_001199138 | NLRC4 | 7.92E-05    | CDS  |
| hsa-miR-6809-5p | NM_001199138 | NLRC4 | 0.0268879   | CDS  |
| hsa-miR-6810-5p | NM_001199138 | NLRC4 | 0.000511852 | CDS  |
| hsa-miR-6810-5p | NM_001199138 | NLRC4 | 0.001088706 | CDS  |

|                 |              |       |             |     |
|-----------------|--------------|-------|-------------|-----|
| hsa-miR-6810-3p | NM_001199138 | NLRC4 | 0.000719145 | CDS |
| hsa-miR-6811-5p | NM_001199138 | NLRC4 | 0.000165293 | CDS |
| hsa-miR-6811-3p | NM_001199138 | NLRC4 | 0.00037471  | CDS |
| hsa-miR-6812-5p | NM_001199138 | NLRC4 | 0.04053145  | CDS |
| hsa-miR-6812-5p | NM_001199138 | NLRC4 | 0.000297589 | CDS |
| hsa-miR-6813-5p | NM_001199138 | NLRC4 | 9.25E-07    | CDS |
| hsa-miR-6813-5p | NM_001199138 | NLRC4 | 3.68E-05    | CDS |
| hsa-miR-6813-3p | NM_001199138 | NLRC4 | 0.004504892 | CDS |
| hsa-miR-6814-3p | NM_001199138 | NLRC4 | 0.008234576 | CDS |
| hsa-miR-6815-5p | NM_001199138 | NLRC4 | 4.03E-05    | CDS |
| hsa-miR-6815-3p | NM_001199138 | NLRC4 | 1.47E-05    | CDS |
| hsa-miR-6815-3p | NM_001199138 | NLRC4 | 7.51E-05    | CDS |
| hsa-miR-6816-5p | NM_001199138 | NLRC4 | 0.000235798 | CDS |
| hsa-miR-6816-5p | NM_001199138 | NLRC4 | 5.49E-05    | CDS |
| hsa-miR-6816-5p | NM_001199138 | NLRC4 | 0.03847363  | CDS |
| hsa-miR-6817-5p | NM_001199138 | NLRC4 | 2.68E-06    | CDS |
| hsa-miR-6817-3p | NM_001199138 | NLRC4 | 0.000719145 | CDS |
| hsa-miR-6818-5p | NM_001199138 | NLRC4 | 0.001053639 | CDS |
| hsa-miR-6818-3p | NM_001199138 | NLRC4 | 0.04729951  | CDS |
| hsa-miR-6819-5p | NM_001199138 | NLRC4 | 3.17E-07    | CDS |
| hsa-miR-6819-5p | NM_001199138 | NLRC4 | 0.000834806 | CDS |
| hsa-miR-6819-5p | NM_001199138 | NLRC4 | 0.000608953 | CDS |
| hsa-miR-6819-3p | NM_001199138 | NLRC4 | 0.000542025 | CDS |
| hsa-miR-6820-5p | NM_001199138 | NLRC4 | 0.1222725   | CDS |
| hsa-miR-6820-5p | NM_001199138 | NLRC4 | 0.02113113  | CDS |
| hsa-miR-6820-5p | NM_001199138 | NLRC4 | 0.008824709 | CDS |
| hsa-miR-6820-3p | NM_001199138 | NLRC4 | 0.000123515 | CDS |
| hsa-miR-6820-3p | NM_001199138 | NLRC4 | 0.03794919  | CDS |
| hsa-miR-6820-3p | NM_001199138 | NLRC4 | 5.56E-06    | CDS |
| hsa-miR-6821-5p | NM_001199138 | NLRC4 | 2.73E-06    | CDS |
| hsa-miR-6821-5p | NM_001199138 | NLRC4 | 1.35E-06    | CDS |
| hsa-miR-6821-5p | NM_001199138 | NLRC4 | 1.39E-05    | CDS |
| hsa-miR-6821-3p | NM_001199138 | NLRC4 | 0.000215389 | CDS |
| hsa-miR-6822-5p | NM_001199138 | NLRC4 | 0.000956925 | CDS |
| hsa-miR-6822-5p | NM_001199138 | NLRC4 | 0.002224226 | CDS |
| hsa-miR-6823-5p | NM_001199138 | NLRC4 | 0.06687653  | CDS |
| hsa-miR-6823-5p | NM_001199138 | NLRC4 | 0.007047336 | CDS |
| hsa-miR-6823-5p | NM_001199138 | NLRC4 | 7.18E-05    | CDS |
| hsa-miR-6823-3p | NM_001199138 | NLRC4 | 2.79E-05    | CDS |
| hsa-miR-6823-3p | NM_001199138 | NLRC4 | 0.000630286 | CDS |
| hsa-miR-6824-5p | NM_001199138 | NLRC4 | 1.00E-06    | CDS |
| hsa-miR-6824-5p | NM_001199138 | NLRC4 | 0.01058857  | CDS |
| hsa-miR-6824-3p | NM_001199138 | NLRC4 | 0.0145008   | CDS |
| hsa-miR-6825-5p | NM_001199138 | NLRC4 | 0.08871414  | CDS |



|                  |              |       |             |     |
|------------------|--------------|-------|-------------|-----|
| hsa-miR-6825-5p  | NM_001199138 | NLRC4 | 0.000142999 | CDS |
| hsa-miR-6825-5p  | NM_001199138 | NLRC4 | 0.001239845 | CDS |
| hsa-miR-6825-3p  | NM_001199138 | NLRC4 | 2.28E-05    | CDS |
| hsa-miR-6825-3p  | NM_001199138 | NLRC4 | 0.01228227  | CDS |
| hsa-miR-6826-5p  | NM_001199138 | NLRC4 | 0.02668285  | CDS |
| hsa-miR-6826-5p  | NM_001199138 | NLRC4 | 6.00E-05    | CDS |
| hsa-miR-6826-3p  | NM_001199138 | NLRC4 | 0.000225565 | CDS |
| hsa-miR-6826-3p  | NM_001199138 | NLRC4 | 0.000583201 | CDS |
| hsa-miR-6826-3p  | NM_001199138 | NLRC4 | 0.000123249 | CDS |
| hsa-miR-6827-5p  | NM_001199138 | NLRC4 | 0.000142999 | CDS |
| hsa-miR-6827-5p  | NM_001199138 | NLRC4 | 2.09E-06    | CDS |
| hsa-miR-6827-3p  | NM_001199138 | NLRC4 | 0.02047911  | CDS |
| hsa-miR-6828-5p  | NM_001199138 | NLRC4 | 0.00180674  | CDS |
| hsa-miR-6828-3p  | NM_001199138 | NLRC4 | 0.007691023 | CDS |
| hsa-miR-6829-5p  | NM_001199138 | NLRC4 | 0.000297589 | CDS |
| hsa-miR-6829-3p  | NM_001199138 | NLRC4 | 0.003672413 | CDS |
| hsa-miR-6829-3p  | NM_001199138 | NLRC4 | 7.69E-05    | CDS |
| hsa-miR-6829-3p  | NM_001199138 | NLRC4 | 1.82E-05    | CDS |
| hsa-miR-6830-5p  | NM_001199138 | NLRC4 | 0.07138354  | CDS |
| hsa-miR-6830-3p  | NM_001199138 | NLRC4 | 0.1045722   | CDS |
| hsa-miR-6831-5p  | NM_001199138 | NLRC4 | 0.0264118   | CDS |
| hsa-miR-6831-5p  | NM_001199138 | NLRC4 | 4.06E-07    | CDS |
| hsa-miR-6833-5p  | NM_001199138 | NLRC4 | 0.09125359  | CDS |
| hsa-miR-6833-5p  | NM_001199138 | NLRC4 | 0.1914291   | CDS |
| hsa-miR-6833-5p  | NM_001199138 | NLRC4 | 0.000502803 | CDS |
| hsa-miR-6833-3p  | NM_001199138 | NLRC4 | 0.000719145 | CDS |
| hsa-miR-6833-3p  | NM_001199138 | NLRC4 | 0.000143515 | CDS |
| hsa-miR-6834-5p  | NM_001199138 | NLRC4 | 0.01058857  | CDS |
| hsa-miR-6834-5p  | NM_001199138 | NLRC4 | 2.48E-06    | CDS |
| hsa-miR-6834-3p  | NM_001199138 | NLRC4 | 0.004370877 | CDS |
| hsa-miR-6835-3p  | NM_001199138 | NLRC4 | 2.59E-05    | CDS |
| hsa-miR-6780b-5p | NM_001199138 | NLRC4 | 0.02261598  | CDS |
| hsa-miR-6780b-5p | NM_001199138 | NLRC4 | 1.13E-05    | CDS |
| hsa-miR-6780b-5p | NM_001199138 | NLRC4 | 0.0696302   | CDS |
| hsa-miR-6780b-3p | NM_001199138 | NLRC4 | 0.000612062 | CDS |
| hsa-miR-6780b-3p | NM_001199138 | NLRC4 | 0.009331195 | CDS |
| hsa-miR-6836-5p  | NM_001199138 | NLRC4 | 2.59E-05    | CDS |
| hsa-miR-6836-5p  | NM_001199138 | NLRC4 | 1.49E-05    | CDS |
| hsa-miR-6836-3p  | NM_001199138 | NLRC4 | 2.92E-05    | CDS |
| hsa-miR-6836-3p  | NM_001199138 | NLRC4 | 4.84E-07    | CDS |
| hsa-miR-6836-3p  | NM_001199138 | NLRC4 | 8.94E-05    | CDS |
| hsa-miR-6837-5p  | NM_001199138 | NLRC4 | 0.001670037 | CDS |
| hsa-miR-6837-5p  | NM_001199138 | NLRC4 | 7.18E-05    | CDS |
| hsa-miR-6837-3p  | NM_001199138 | NLRC4 | 0.00095499  | CDS |

|                 |              |       |             |      |
|-----------------|--------------|-------|-------------|------|
| hsa-miR-6837-3p | NM_001199138 | NLRC4 | 0.003065349 | CDS  |
| hsa-miR-6837-3p | NM_001199138 | NLRC4 | 0.00561403  | CDS  |
| hsa-miR-6838-5p | NM_001199138 | NLRC4 | 4.93E-05    | CDS  |
| hsa-miR-6838-5p | NM_001199138 | NLRC4 | 6.12E-08    | CDS  |
| hsa-miR-6838-3p | NM_001199138 | NLRC4 | 4.96E-05    | CDS  |
| hsa-miR-6838-3p | NM_001199138 | NLRC4 | 0.000542111 | CDS  |
| hsa-miR-6838-3p | NM_001199138 | NLRC4 | 0.000248086 | CDS  |
| hsa-miR-6838-3p | NM_001199138 | NLRC4 | 6.20E-05    | CDS  |
| hsa-miR-6839-5p | NM_001199138 | NLRC4 | 0.02595679  | CDS  |
| hsa-miR-6839-5p | NM_001199138 | NLRC4 | 0.002919858 | 5UTR |
| hsa-miR-6839-3p | NM_001199138 | NLRC4 | 0.003503197 | CDS  |
| hsa-miR-6840-5p | NM_001199138 | NLRC4 | 0.003963322 | CDS  |
| hsa-miR-6840-3p | NM_001199138 | NLRC4 | 1.52E-06    | CDS  |
| hsa-miR-6841-5p | NM_001199138 | NLRC4 | 6.21E-05    | CDS  |
| hsa-miR-6841-5p | NM_001199138 | NLRC4 | 0.000264029 | CDS  |
| hsa-miR-6841-3p | NM_001199138 | NLRC4 | 4.54E-05    | CDS  |
| hsa-miR-6841-3p | NM_001199138 | NLRC4 | 0.00027781  | CDS  |
| hsa-miR-6842-5p | NM_001199138 | NLRC4 | 4.95E-07    | CDS  |
| hsa-miR-6842-5p | NM_001199138 | NLRC4 | 0.000511852 | CDS  |
| hsa-miR-6842-5p | NM_001199138 | NLRC4 | 0.01247752  | CDS  |
| hsa-miR-6842-3p | NM_001199138 | NLRC4 | 0.001503355 | CDS  |
| hsa-miR-6842-3p | NM_001199138 | NLRC4 | 0.008288481 | CDS  |
| hsa-miR-6842-3p | NM_001199138 | NLRC4 | 1.35E-05    | CDS  |
| hsa-miR-6842-3p | NM_001199138 | NLRC4 | 0.000953849 | CDS  |
| hsa-miR-6843-3p | NM_001199138 | NLRC4 | 0.000324703 | CDS  |
| hsa-miR-6843-3p | NM_001199138 | NLRC4 | 0.000285159 | CDS  |
| hsa-miR-6845-5p | NM_001199138 | NLRC4 | 9.56E-06    | CDS  |
| hsa-miR-6846-5p | NM_001199138 | NLRC4 | 0.04340877  | CDS  |
| hsa-miR-6846-5p | NM_001199138 | NLRC4 | 0.2077442   | CDS  |
| hsa-miR-6846-5p | NM_001199138 | NLRC4 | 0.000511852 | CDS  |
| hsa-miR-6846-3p | NM_001199138 | NLRC4 | 0.0210857   | CDS  |
| hsa-miR-6847-5p | NM_001199138 | NLRC4 | 0.003430122 | 5UTR |
| hsa-miR-6847-5p | NM_001199138 | NLRC4 | 0.000100105 | CDS  |
| hsa-miR-6847-5p | NM_001199138 | NLRC4 | 0.00091255  | CDS  |
| hsa-miR-6847-3p | NM_001199138 | NLRC4 | 0.01135737  | CDS  |
| hsa-miR-6847-3p | NM_001199138 | NLRC4 | 2.03E-05    | 5UTR |
| hsa-miR-6847-3p | NM_001199138 | NLRC4 | 0.02194376  | CDS  |
| hsa-miR-6848-5p | NM_001199138 | NLRC4 | 0.000511852 | CDS  |
| hsa-miR-6848-5p | NM_001199138 | NLRC4 | 9.62E-07    | CDS  |
| hsa-miR-6848-3p | NM_001199138 | NLRC4 | 7.19E-05    | CDS  |
| hsa-miR-6849-5p | NM_001199138 | NLRC4 | 0.03110691  | CDS  |
| hsa-miR-6849-3p | NM_001199138 | NLRC4 | 0.006567177 | CDS  |
| hsa-miR-6849-3p | NM_001199138 | NLRC4 | 6.06E-05    | CDS  |
| hsa-miR-6849-3p | NM_001199138 | NLRC4 | 0.06961787  | CDS  |

|                  |              |       |             |     |
|------------------|--------------|-------|-------------|-----|
| hsa-miR-6850-5p  | NM_001199138 | NLRC4 | 1.39E-05    | CDS |
| hsa-miR-6850-5p  | NM_001199138 | NLRC4 | 0.000345859 | CDS |
| hsa-miR-6850-5p  | NM_001199138 | NLRC4 | 8.81E-06    | CDS |
| hsa-miR-6850-3p  | NM_001199138 | NLRC4 | 1.83E-05    | CDS |
| hsa-miR-6850-3p  | NM_001199138 | NLRC4 | 6.15E-05    | CDS |
| hsa-miR-6851-5p  | NM_001199138 | NLRC4 | 1.00E-06    | CDS |
| hsa-miR-6851-5p  | NM_001199138 | NLRC4 | 0.08802059  | CDS |
| hsa-miR-6851-3p  | NM_001199138 | NLRC4 | 0.000612062 | CDS |
| hsa-miR-6852-5p  | NM_001199138 | NLRC4 | 0.002217478 | CDS |
| hsa-miR-6852-5p  | NM_001199138 | NLRC4 | 7.16E-06    | CDS |
| hsa-miR-6852-3p  | NM_001199138 | NLRC4 | 0.02033551  | CDS |
| hsa-miR-6853-5p  | NM_001199138 | NLRC4 | 0.004588791 | CDS |
| hsa-miR-6853-5p  | NM_001199138 | NLRC4 | 0.000357171 | CDS |
| hsa-miR-6854-3p  | NM_001199138 | NLRC4 | 0.01228227  | CDS |
| hsa-miR-6855-5p  | NM_001199138 | NLRC4 | 0.000478711 | CDS |
| hsa-miR-6855-5p  | NM_001199138 | NLRC4 | 0.000170577 | CDS |
| hsa-miR-6856-5p  | NM_001199138 | NLRC4 | 0.005224415 | CDS |
| hsa-miR-6856-5p  | NM_001199138 | NLRC4 | 0.00237631  | CDS |
| hsa-miR-6856-3p  | NM_001199138 | NLRC4 | 3.55E-05    | CDS |
| hsa-miR-6857-5p  | NM_001199138 | NLRC4 | 0.000511852 | CDS |
| hsa-miR-6857-5p  | NM_001199138 | NLRC4 | 0.000511852 | CDS |
| hsa-miR-6857-5p  | NM_001199138 | NLRC4 | 0.03847363  | CDS |
| hsa-miR-6857-3p  | NM_001199138 | NLRC4 | 2.06E-05    | CDS |
| hsa-miR-6857-3p  | NM_001199138 | NLRC4 | 0.000103244 | CDS |
| hsa-miR-6857-3p  | NM_001199138 | NLRC4 | 0.006712235 | CDS |
| hsa-miR-6858-5p  | NM_001199138 | NLRC4 | 0.009417785 | CDS |
| hsa-miR-6858-3p  | NM_001199138 | NLRC4 | 0.001172201 | CDS |
| hsa-miR-6858-3p  | NM_001199138 | NLRC4 | 2.79E-05    | CDS |
| hsa-miR-6858-3p  | NM_001199138 | NLRC4 | 0.000170659 | CDS |
| hsa-miR-6859-5p  | NM_001199138 | NLRC4 | 0.000654256 | CDS |
| hsa-miR-6859-3p  | NM_001199138 | NLRC4 | 5.54E-06    | CDS |
| hsa-miR-6769b-5p | NM_001199138 | NLRC4 | 0.002365478 | CDS |
| hsa-miR-6769b-5p | NM_001199138 | NLRC4 | 0.008120752 | CDS |
| hsa-miR-6769b-3p | NM_001199138 | NLRC4 | 0.000225565 | CDS |
| hsa-miR-6860     | NM_001199138 | NLRC4 | 1.92E-06    | CDS |
| hsa-miR-6860     | NM_001199138 | NLRC4 | 0.00216149  | CDS |
| hsa-miR-6860     | NM_001199138 | NLRC4 | 0.1399983   | CDS |
| hsa-miR-6861-5p  | NM_001199138 | NLRC4 | 0.1399983   | CDS |
| hsa-miR-6861-5p  | NM_001199138 | NLRC4 | 0.08241963  | CDS |
| hsa-miR-6862-5p  | NM_001199138 | NLRC4 | 0.000671559 | CDS |
| hsa-miR-6862-3p  | NM_001199138 | NLRC4 | 1.12E-05    | CDS |
| hsa-miR-6863     | NM_001199138 | NLRC4 | 0.009417785 | CDS |
| hsa-miR-6863     | NM_001199138 | NLRC4 | 0.00293663  | CDS |
| hsa-miR-6864-5p  | NM_001199138 | NLRC4 | 7.42E-05    | CDS |

|                 |              |       |             |      |
|-----------------|--------------|-------|-------------|------|
| hsa-miR-6864-3p | NM_001199138 | NLRC4 | 0.000357171 | CDS  |
| hsa-miR-6865-5p | NM_001199138 | NLRC4 | 0.001023348 | CDS  |
| hsa-miR-6866-3p | NM_001199138 | NLRC4 | 0.01235071  | 5UTR |
| hsa-miR-6866-3p | NM_001199138 | NLRC4 | 0.00199289  | CDS  |
| hsa-miR-6867-5p | NM_001199138 | NLRC4 | 0.03296809  | CDS  |
| hsa-miR-6868-3p | NM_001199138 | NLRC4 | 0.004537093 | CDS  |
| hsa-miR-6868-3p | NM_001199138 | NLRC4 | 0.0037024   | CDS  |
| hsa-miR-6868-3p | NM_001199138 | NLRC4 | 1.08E-05    | CDS  |
| hsa-miR-6869-5p | NM_001199138 | NLRC4 | 1.97E-05    | CDS  |
| hsa-miR-6869-5p | NM_001199138 | NLRC4 | 0.02289173  | CDS  |
| hsa-miR-6869-3p | NM_001199138 | NLRC4 | 1.77E-06    | CDS  |
| hsa-miR-6870-5p | NM_001199138 | NLRC4 | 0.2077442   | CDS  |
| hsa-miR-6870-5p | NM_001199138 | NLRC4 | 0.1188673   | CDS  |
| hsa-miR-6870-5p | NM_001199138 | NLRC4 | 0.000297589 | CDS  |
| hsa-miR-6870-3p | NM_001199138 | NLRC4 | 0.008234576 | CDS  |
| hsa-miR-6870-3p | NM_001199138 | NLRC4 | 0.01952984  | CDS  |
| hsa-miR-6871-5p | NM_001199138 | NLRC4 | 5.90E-05    | CDS  |
| hsa-miR-6871-5p | NM_001199138 | NLRC4 | 0.000334534 | CDS  |
| hsa-miR-6871-5p | NM_001199138 | NLRC4 | 0.000142999 | CDS  |
| hsa-miR-6871-5p | NM_001199138 | NLRC4 | 4.56E-05    | CDS  |
| hsa-miR-6872-5p | NM_001199138 | NLRC4 | 0.02567779  | CDS  |
| hsa-miR-6872-5p | NM_001199138 | NLRC4 | 0.01148179  | CDS  |
| hsa-miR-6872-5p | NM_001199138 | NLRC4 | 8.75E-06    | CDS  |
| hsa-miR-6872-3p | NM_001199138 | NLRC4 | 0.000119651 | CDS  |
| hsa-miR-6872-3p | NM_001199138 | NLRC4 | 0.004370877 | CDS  |
| hsa-miR-6873-5p | NM_001199138 | NLRC4 | 0.01473863  | CDS  |
| hsa-miR-6874-5p | NM_001199138 | NLRC4 | 3.68E-05    | CDS  |
| hsa-miR-6874-3p | NM_001199138 | NLRC4 | 0.01885488  | CDS  |
| hsa-miR-6874-3p | NM_001199138 | NLRC4 | 0.000272475 | CDS  |
| hsa-miR-6875-5p | NM_001199138 | NLRC4 | 0.000671559 | CDS  |
| hsa-miR-6875-3p | NM_001199138 | NLRC4 | 0.001206662 | CDS  |
| hsa-miR-6875-3p | NM_001199138 | NLRC4 | 0.00118012  | CDS  |
| hsa-miR-6875-3p | NM_001199138 | NLRC4 | 0.02486339  | CDS  |
| hsa-miR-6875-3p | NM_001199138 | NLRC4 | 6.44E-07    | CDS  |
| hsa-miR-6876-5p | NM_001199138 | NLRC4 | 0.000536357 | CDS  |
| hsa-miR-6876-5p | NM_001199138 | NLRC4 | 0.0264118   | CDS  |
| hsa-miR-6876-3p | NM_001199138 | NLRC4 | 0.03794919  | CDS  |
| hsa-miR-6876-3p | NM_001199138 | NLRC4 | 2.18E-05    | CDS  |
| hsa-miR-6877-5p | NM_001199138 | NLRC4 | 0.001447161 | CDS  |
| hsa-miR-6877-5p | NM_001199138 | NLRC4 | 0.002224226 | CDS  |
| hsa-miR-6877-3p | NM_001199138 | NLRC4 | 2.79E-05    | CDS  |
| hsa-miR-6878-5p | NM_001199138 | NLRC4 | 0.000654256 | CDS  |
| hsa-miR-6878-3p | NM_001199138 | NLRC4 | 0.000772438 | CDS  |
| hsa-miR-6879-5p | NM_001199138 | NLRC4 | 6.00E-06    | CDS  |

|                 |              |       |             |      |
|-----------------|--------------|-------|-------------|------|
| hsa-miR-6879-5p | NM_001199138 | NLRC4 | 0.000144025 | CDS  |
| hsa-miR-6879-3p | NM_001199138 | NLRC4 | 0.000196593 | CDS  |
| hsa-miR-6880-5p | NM_001199138 | NLRC4 | 0.0268879   | CDS  |
| hsa-miR-6880-5p | NM_001199138 | NLRC4 | 0.002365478 | CDS  |
| hsa-miR-6880-3p | NM_001199138 | NLRC4 | 0.000447996 | CDS  |
| hsa-miR-6880-3p | NM_001199138 | NLRC4 | 0.02047911  | CDS  |
| hsa-miR-6881-3p | NM_001199138 | NLRC4 | 0.000215389 | CDS  |
| hsa-miR-6881-3p | NM_001199138 | NLRC4 | 0.000583201 | CDS  |
| hsa-miR-6881-3p | NM_001199138 | NLRC4 | 0.000475498 | CDS  |
| hsa-miR-6882-5p | NM_001199138 | NLRC4 | 0.002677635 | CDS  |
| hsa-miR-6883-5p | NM_001199138 | NLRC4 | 0.1547776   | CDS  |
| hsa-miR-6883-5p | NM_001199138 | NLRC4 | 0.0645003   | CDS  |
| hsa-miR-6883-5p | NM_001199138 | NLRC4 | 1.13E-05    | CDS  |
| hsa-miR-6883-3p | NM_001199138 | NLRC4 | 0.000583201 | CDS  |
| hsa-miR-6883-3p | NM_001199138 | NLRC4 | 0.000106281 | CDS  |
| hsa-miR-6884-5p | NM_001199138 | NLRC4 | 4.35E-05    | CDS  |
| hsa-miR-6884-3p | NM_001199138 | NLRC4 | 0.000115647 | CDS  |
| hsa-miR-6884-3p | NM_001199138 | NLRC4 | 0.000120074 | CDS  |
| hsa-miR-6885-5p | NM_001199138 | NLRC4 | 0.000207579 | CDS  |
| hsa-miR-6885-3p | NM_001199138 | NLRC4 | 0.000378314 | CDS  |
| hsa-miR-6886-5p | NM_001199138 | NLRC4 | 0.000120896 | CDS  |
| hsa-miR-6886-5p | NM_001199138 | NLRC4 | 0.00107409  | CDS  |
| hsa-miR-6886-3p | NM_001199138 | NLRC4 | 0.000583201 | CDS  |
| hsa-miR-6887-5p | NM_001199138 | NLRC4 | 0.000297589 | CDS  |
| hsa-miR-6887-5p | NM_001199138 | NLRC4 | 0.008684867 | 5UTR |
| hsa-miR-6887-3p | NM_001199138 | NLRC4 | 0.000583201 | CDS  |
| hsa-miR-6887-3p | NM_001199138 | NLRC4 | 0.000719145 | CDS  |
| hsa-miR-6888-5p | NM_001199138 | NLRC4 | 0.000294775 | CDS  |
| hsa-miR-6888-5p | NM_001199138 | NLRC4 | 0.001409008 | CDS  |
| hsa-miR-6888-3p | NM_001199138 | NLRC4 | 0.05185139  | CDS  |
| hsa-miR-6889-5p | NM_001199138 | NLRC4 | 0.1188673   | CDS  |
| hsa-miR-6889-5p | NM_001199138 | NLRC4 | 0.00086116  | CDS  |
| hsa-miR-6889-3p | NM_001199138 | NLRC4 | 0.01223285  | CDS  |
| hsa-miR-6890-5p | NM_001199138 | NLRC4 | 0.000235798 | CDS  |
| hsa-miR-6890-5p | NM_001199138 | NLRC4 | 0.003203264 | CDS  |
| hsa-miR-6890-3p | NM_001199138 | NLRC4 | 0.009187106 | CDS  |
| hsa-miR-6891-5p | NM_001199138 | NLRC4 | 0.07765027  | CDS  |
| hsa-miR-6891-5p | NM_001199138 | NLRC4 | 0.000163267 | CDS  |
| hsa-miR-6891-5p | NM_001199138 | NLRC4 | 0.05553747  | CDS  |
| hsa-miR-6891-3p | NM_001199138 | NLRC4 | 0.008234576 | CDS  |
| hsa-miR-6892-5p | NM_001199138 | NLRC4 | 7.36E-05    | CDS  |
| hsa-miR-6892-5p | NM_001199138 | NLRC4 | 0.001027397 | CDS  |
| hsa-miR-6892-5p | NM_001199138 | NLRC4 | 0.04749199  | CDS  |
| hsa-miR-6892-3p | NM_001199138 | NLRC4 | 0.000719145 | CDS  |

|                 |              |       |             |      |
|-----------------|--------------|-------|-------------|------|
| hsa-miR-6893-5p | NM_001199138 | NLRC4 | 0.000100105 | CDS  |
| hsa-miR-6893-5p | NM_001199138 | NLRC4 | 9.79E-05    | CDS  |
| hsa-miR-6894-5p | NM_001199138 | NLRC4 | 9.62E-07    | CDS  |
| hsa-miR-6894-5p | NM_001199138 | NLRC4 | 8.25E-06    | CDS  |
| hsa-miR-6894-5p | NM_001199138 | NLRC4 | 0.000598122 | CDS  |
| hsa-miR-6894-5p | NM_001199138 | NLRC4 | 3.18E-05    | CDS  |
| hsa-miR-6895-5p | NM_001199138 | NLRC4 | 1.49E-05    | CDS  |
| hsa-miR-6895-3p | NM_001199138 | NLRC4 | 8.86E-07    | CDS  |
| hsa-miR-6895-3p | NM_001199138 | NLRC4 | 7.53E-05    | CDS  |
| hsa-miR-6895-3p | NM_001199138 | NLRC4 | 0.00042543  | CDS  |
| hsa-miR-7106-5p | NM_001199138 | NLRC4 | 0.05553747  | CDS  |
| hsa-miR-7106-5p | NM_001199138 | NLRC4 | 0.009044755 | CDS  |
| hsa-miR-7106-5p | NM_001199138 | NLRC4 | 0.08882998  | CDS  |
| hsa-miR-7106-3p | NM_001199138 | NLRC4 | 0.000271085 | CDS  |
| hsa-miR-7106-3p | NM_001199138 | NLRC4 | 0.000129339 | CDS  |
| hsa-miR-7107-5p | NM_001199138 | NLRC4 | 4.84E-07    | CDS  |
| hsa-miR-7107-3p | NM_001199138 | NLRC4 | 1.96E-05    | 5UTR |
| hsa-miR-7108-5p | NM_001199138 | NLRC4 | 1.33E-05    | CDS  |
| hsa-miR-7109-5p | NM_001199138 | NLRC4 | 7.85E-05    | CDS  |
| hsa-miR-7109-5p | NM_001199138 | NLRC4 | 0.05383761  | CDS  |
| hsa-miR-7109-3p | NM_001199138 | NLRC4 | 0.00015002  | CDS  |
| hsa-miR-7110-5p | NM_001199138 | NLRC4 | 3.17E-07    | CDS  |
| hsa-miR-7110-5p | NM_001199138 | NLRC4 | 0.05611306  | CDS  |
| hsa-miR-7110-3p | NM_001199138 | NLRC4 | 0.000106281 | CDS  |
| hsa-miR-7111-5p | NM_001199138 | NLRC4 | 0.0268879   | CDS  |
| hsa-miR-7111-5p | NM_001199138 | NLRC4 | 0.007362526 | CDS  |
| hsa-miR-7111-5p | NM_001199138 | NLRC4 | 0.04053145  | CDS  |
| hsa-miR-7111-3p | NM_001199138 | NLRC4 | 0.000583201 | CDS  |
| hsa-miR-7112-5p | NM_001199138 | NLRC4 | 0.001914154 | CDS  |
| hsa-miR-7112-3p | NM_001199138 | NLRC4 | 8.91E-06    | CDS  |
| hsa-miR-7112-3p | NM_001199138 | NLRC4 | 0.02815115  | CDS  |
| hsa-miR-7113-3p | NM_001199138 | NLRC4 | 0.000215389 | CDS  |
| hsa-miR-7114-5p | NM_001199138 | NLRC4 | 0.000570492 | CDS  |
| hsa-miR-7114-5p | NM_001199138 | NLRC4 | 0.000649339 | CDS  |
| hsa-miR-7114-3p | NM_001199138 | NLRC4 | 0.005833398 | CDS  |
| hsa-miR-7114-3p | NM_001199138 | NLRC4 | 0.006803227 | CDS  |
| hsa-miR-7150    | NM_001199138 | NLRC4 | 0.009056833 | CDS  |
| hsa-miR-7151-5p | NM_001199138 | NLRC4 | 0.003398753 | CDS  |
| hsa-miR-7151-3p | NM_001199138 | NLRC4 | 9.39E-05    | CDS  |
| hsa-miR-7152-5p | NM_001199138 | NLRC4 | 6.20E-07    | CDS  |
| hsa-miR-7152-5p | NM_001199138 | NLRC4 | 0.000352314 | CDS  |
| hsa-miR-7152-3p | NM_001199138 | NLRC4 | 8.80E-06    | CDS  |
| hsa-miR-7152-3p | NM_001199138 | NLRC4 | 6.19E-05    | CDS  |
| hsa-miR-7154-3p | NM_001199138 | NLRC4 | 0.001831151 | CDS  |

|                  |              |       |             |      |
|------------------|--------------|-------|-------------|------|
| hsa-miR-7154-3p  | NM_001199138 | NLRC4 | 0.06344209  | CDS  |
| hsa-miR-7154-3p  | NM_001199138 | NLRC4 | 0.001014646 | CDS  |
| hsa-miR-7155-5p  | NM_001199138 | NLRC4 | 0.05005492  | CDS  |
| hsa-miR-7155-5p  | NM_001199138 | NLRC4 | 0.004474328 | CDS  |
| hsa-miR-7155-5p  | NM_001199138 | NLRC4 | 5.56E-06    | CDS  |
| hsa-miR-7156-5p  | NM_001199138 | NLRC4 | 0.008149687 | CDS  |
| hsa-miR-7156-3p  | NM_001199138 | NLRC4 | 0.000150393 | CDS  |
| hsa-miR-7156-3p  | NM_001199138 | NLRC4 | 3.55E-05    | CDS  |
| hsa-miR-7156-3p  | NM_001199138 | NLRC4 | 0.000324004 | CDS  |
| hsa-miR-7157-5p  | NM_001199138 | NLRC4 | 2.75E-07    | CDS  |
| hsa-miR-7157-3p  | NM_001199138 | NLRC4 | 6.32E-05    | CDS  |
| hsa-miR-7158-5p  | NM_001199138 | NLRC4 | 0.004721326 | CDS  |
| hsa-miR-7158-3p  | NM_001199138 | NLRC4 | 0.00024586  | CDS  |
| hsa-miR-7158-3p  | NM_001199138 | NLRC4 | 0.02815115  | CDS  |
| hsa-miR-7161-3p  | NM_001199138 | NLRC4 | 0.1263682   | CDS  |
| hsa-miR-7161-3p  | NM_001199138 | NLRC4 | 0.00199289  | CDS  |
| hsa-miR-7160-5p  | NM_001199138 | NLRC4 | 0.001014772 | CDS  |
| hsa-miR-7160-5p  | NM_001199138 | NLRC4 | 0.01363586  | CDS  |
| hsa-miR-7160-5p  | NM_001199138 | NLRC4 | 0.000923374 | CDS  |
| hsa-miR-7160-3p  | NM_001199138 | NLRC4 | 8.81E-06    | CDS  |
| hsa-miR-7160-3p  | NM_001199138 | NLRC4 | 0.001262872 | CDS  |
| hsa-miR-7160-3p  | NM_001199138 | NLRC4 | 1.43E-05    | CDS  |
| hsa-miR-7162-5p  | NM_001199138 | NLRC4 | 2.98E-05    | CDS  |
| hsa-miR-7162-3p  | NM_001199138 | NLRC4 | 0.08763861  | CDS  |
| hsa-miR-7162-3p  | NM_001199138 | NLRC4 | 0.08743824  | CDS  |
| hsa-miR-7703     | NM_001199138 | NLRC4 | 2.28E-05    | CDS  |
| hsa-miR-7704     | NM_001199138 | NLRC4 | 0.000441636 | CDS  |
| hsa-miR-7704     | NM_001199138 | NLRC4 | 4.74E-05    | CDS  |
| hsa-miR-7705     | NM_001199138 | NLRC4 | 4.24E-05    | CDS  |
| hsa-miR-7706     | NM_001199138 | NLRC4 | 2.62E-05    | CDS  |
| hsa-miR-7706     | NM_001199138 | NLRC4 | 0.000499666 | CDS  |
| hsa-miR-7843-5p  | NM_001199138 | NLRC4 | 8.69E-06    | CDS  |
| hsa-miR-7843-5p  | NM_001199138 | NLRC4 | 5.60E-05    | CDS  |
| hsa-miR-7843-5p  | NM_001199138 | NLRC4 | 6.44E-05    | CDS  |
| hsa-miR-7843-3p  | NM_001199138 | NLRC4 | 0.000169476 | CDS  |
| hsa-miR-7843-3p  | NM_001199138 | NLRC4 | 2.48E-06    | CDS  |
| hsa-miR-7843-3p  | NM_001199138 | NLRC4 | 0.000192969 | CDS  |
| hsa-miR-4433b-5p | NM_001199138 | NLRC4 | 0.009171114 | CDS  |
| hsa-miR-4433b-3p | NM_001199138 | NLRC4 | 0.01473863  | CDS  |
| hsa-miR-4433b-3p | NM_001199138 | NLRC4 | 0.001170791 | CDS  |
| hsa-miR-4433b-3p | NM_001199138 | NLRC4 | 0.01459592  | CDS  |
| hsa-miR-1273h-5p | NM_001199138 | NLRC4 | 5.25E-06    | CDS  |
| hsa-miR-1273h-5p | NM_001199138 | NLRC4 | 0.000276588 | 5UTR |
| hsa-miR-1273h-5p | NM_001199138 | NLRC4 | 0.02468582  | CDS  |

|                  |              |       |             |      |
|------------------|--------------|-------|-------------|------|
| hsa-miR-1273h-3p | NM_001199138 | NLRC4 | 0.000889202 | CDS  |
| hsa-miR-6516-5p  | NM_001199138 | NLRC4 | 0.000416659 | CDS  |
| hsa-miR-7845-5p  | NM_001199138 | NLRC4 | 0.000642323 | CDS  |
| hsa-miR-7846-3p  | NM_001199138 | NLRC4 | 0.000400492 | CDS  |
| hsa-miR-7847-3p  | NM_001199138 | NLRC4 | 0.02308038  | CDS  |
| hsa-miR-7847-3p  | NM_001199138 | NLRC4 | 0.000605168 | CDS  |
| hsa-miR-7847-3p  | NM_001199138 | NLRC4 | 0.001445108 | CDS  |
| hsa-miR-7848-3p  | NM_001199138 | NLRC4 | 4.84E-07    | CDS  |
| hsa-miR-7848-3p  | NM_001199138 | NLRC4 | 0.000225565 | CDS  |
| hsa-miR-7848-3p  | NM_001199138 | NLRC4 | 1.88E-05    | CDS  |
| hsa-miR-7849-3p  | NM_001199138 | NLRC4 | 0.001054134 | CDS  |
| hsa-miR-7849-3p  | NM_001199138 | NLRC4 | 0.000722043 | 5UTR |
| hsa-miR-7849-3p  | NM_001199138 | NLRC4 | 0.01407431  | CDS  |
| hsa-miR-7850-5p  | NM_001199138 | NLRC4 | 0.01693603  | CDS  |
| hsa-miR-7851-3p  | NM_001199138 | NLRC4 | 8.80E-06    | CDS  |
| hsa-miR-7851-3p  | NM_001199138 | NLRC4 | 0.1121072   | CDS  |
| hsa-miR-7853-5p  | NM_001199138 | NLRC4 | 6.41E-06    | CDS  |
| hsa-miR-7854-3p  | NM_001199138 | NLRC4 | 0.000407782 | CDS  |
| hsa-miR-7854-3p  | NM_001199138 | NLRC4 | 0.000432941 | CDS  |
| hsa-miR-7856-5p  | NM_001199138 | NLRC4 | 0.002224226 | CDS  |
| hsa-miR-548ba    | NM_001199138 | NLRC4 | 0.02268423  | CDS  |
| hsa-miR-7973     | NM_001199138 | NLRC4 | 0.000123515 | CDS  |
| hsa-miR-7974     | NM_001199138 | NLRC4 | 0.02194376  | CDS  |
| hsa-miR-7974     | NM_001199138 | NLRC4 | 0.00037471  | CDS  |
| hsa-miR-7974     | NM_001199138 | NLRC4 | 4.41E-05    | CDS  |
| hsa-miR-7978     | NM_001199138 | NLRC4 | 0.001057125 | CDS  |
| hsa-miR-7978     | NM_001199138 | NLRC4 | 0.000260618 | CDS  |
| hsa-miR-8052     | NM_001199138 | NLRC4 | 0.000189447 | CDS  |
| hsa-miR-8054     | NM_001199138 | NLRC4 | 0.1888091   | CDS  |
| hsa-miR-8054     | NM_001199138 | NLRC4 | 0.007995041 | CDS  |
| hsa-miR-8055     | NM_001199138 | NLRC4 | 1.21E-05    | CDS  |
| hsa-miR-8055     | NM_001199138 | NLRC4 | 0.08763861  | CDS  |
| hsa-miR-8055     | NM_001199138 | NLRC4 | 0.002863565 | CDS  |
| hsa-miR-8056     | NM_001199138 | NLRC4 | 2.74E-05    | CDS  |
| hsa-miR-8056     | NM_001199138 | NLRC4 | 0.02308038  | CDS  |
| hsa-miR-8057     | NM_001199138 | NLRC4 | 0.000671559 | CDS  |
| hsa-miR-8057     | NM_001199138 | NLRC4 | 4.87E-05    | CDS  |
| hsa-miR-8058     | NM_001199138 | NLRC4 | 0.000228869 | CDS  |
| hsa-miR-8058     | NM_001199138 | NLRC4 | 0.003596187 | CDS  |
| hsa-miR-8059     | NM_001199138 | NLRC4 | 0.000671559 | CDS  |
| hsa-miR-8060     | NM_001199138 | NLRC4 | 0.00095499  | CDS  |
| hsa-miR-8060     | NM_001199138 | NLRC4 | 0.000146875 | CDS  |
| hsa-miR-8064     | NM_001199138 | NLRC4 | 0.000167343 | CDS  |
| hsa-miR-8065     | NM_001199138 | NLRC4 | 0.002757795 | CDS  |



|               |              |       |             |     |
|---------------|--------------|-------|-------------|-----|
| hsa-miR-8069  | NM_001199138 | NLRC4 | 0.000771038 | CDS |
| hsa-miR-8069  | NM_001199138 | NLRC4 | 0.0264118   | CDS |
| hsa-miR-8069  | NM_001199138 | NLRC4 | 8.25E-06    | CDS |
| hsa-miR-8071  | NM_001199138 | NLRC4 | 0.000724533 | CDS |
| hsa-miR-8072  | NM_001199138 | NLRC4 | 0.003824517 | CDS |
| hsa-miR-8074  | NM_001199138 | NLRC4 | 1.91E-05    | CDS |
| hsa-miR-8075  | NM_001199138 | NLRC4 | 0.000988815 | CDS |
| hsa-miR-8077  | NM_001199138 | NLRC4 | 0.002226838 | CDS |
| hsa-miR-8077  | NM_001199138 | NLRC4 | 0.05045639  | CDS |
| hsa-miR-8077  | NM_001199138 | NLRC4 | 0.00092503  | CDS |
| hsa-miR-8078  | NM_001199138 | NLRC4 | 4.03E-05    | CDS |
| hsa-miR-8078  | NM_001199138 | NLRC4 | 1.60E-06    | CDS |
| hsa-miR-8079  | NM_001199138 | NLRC4 | 0.002221194 | CDS |
| hsa-miR-8079  | NM_001199138 | NLRC4 | 0.001836158 | CDS |
| hsa-miR-8080  | NM_001199138 | NLRC4 | 0.005514936 | CDS |
| hsa-miR-8081  | NM_001199138 | NLRC4 | 0.06961787  | CDS |
| hsa-miR-8081  | NM_001199138 | NLRC4 | 0.01195042  | CDS |
| hsa-miR-8083  | NM_001199138 | NLRC4 | 6.21E-05    | CDS |
| hsa-miR-8085  | NM_001199138 | NLRC4 | 0.004639071 | CDS |
| hsa-miR-8085  | NM_001199138 | NLRC4 | 0.01496644  | CDS |
| hsa-miR-8087  | NM_001199138 | NLRC4 | 0.004768539 | CDS |
| hsa-miR-8088  | NM_001199138 | NLRC4 | 0.01016125  | CDS |
| hsa-miR-8088  | NM_001199138 | NLRC4 | 3.93E-07    | CDS |
| hsa-miR-8089  | NM_001199138 | NLRC4 | 8.53E-06    | CDS |
| hsa-miR-8089  | NM_001199138 | NLRC4 | 0.08241963  | CDS |
| hsa-miR-8089  | NM_001199138 | NLRC4 | 0.001372911 | CDS |
| hsa-miR-8089  | NM_001199138 | NLRC4 | 8.80E-06    | CDS |
| hsa-miR-9500  | NM_001199138 | NLRC4 | 0.01189954  | CDS |
| hsa-miR-9718  | NM_001199138 | NLRC4 | 0.000999579 | CDS |
| hsa-miR-9718  | NM_001199138 | NLRC4 | 0.01275645  | CDS |
| hsa-miR-9899  | NM_001199138 | NLRC4 | 0.001262872 | CDS |
| hsa-miR-9900  | NM_001199138 | NLRC4 | 0.000107954 | CDS |
| hsa-miR-9901  | NM_001199138 | NLRC4 | 0.005613622 | CDS |
| hsa-miR-9901  | NM_001199138 | NLRC4 | 7.08E-06    | CDS |
| hsa-miR-9902  | NM_001199138 | NLRC4 | 0.0011826   | CDS |
| hsa-miR-9902  | NM_001199138 | NLRC4 | 7.08E-06    | CDS |
| hsa-miR-9903  | NM_001199138 | NLRC4 | 1.88E-05    | CDS |
| hsa-miR-9903  | NM_001199138 | NLRC4 | 0.00042543  | CDS |
| hsa-miR-9985  | NM_001199138 | NLRC4 | 2.13E-05    | CDS |
| hsa-miR-1843  | NM_001199138 | NLRC4 | 4.35E-05    | CDS |
| hsa-miR-1843  | NM_001199138 | NLRC4 | 8.81E-06    | CDS |
| hsa-miR-9986  | NM_001199138 | NLRC4 | 6.17E-06    | CDS |
| hsa-miR-9986  | NM_001199138 | NLRC4 | 9.35E-05    | CDS |
| hsa-miR-10226 | NM_001199138 | NLRC4 | 0.05000951  | CDS |

|                   |              |       |             |     |
|-------------------|--------------|-------|-------------|-----|
| hsa-miR-10392-5p  | NM_001199138 | NLRC4 | 0.004769708 | CDS |
| hsa-miR-10392-5p  | NM_001199138 | NLRC4 | 0.003599718 | CDS |
| hsa-miR-10392-3p  | NM_001199138 | NLRC4 | 1.12E-05    | CDS |
| hsa-miR-10393-3p  | NM_001199138 | NLRC4 | 0.00043678  | CDS |
| hsa-miR-10393-3p  | NM_001199138 | NLRC4 | 0.002815688 | CDS |
| hsa-miR-10394-5p  | NM_001199138 | NLRC4 | 0.007691023 | CDS |
| hsa-miR-10394-5p  | NM_001199138 | NLRC4 | 4.48E-05    | CDS |
| hsa-miR-10394-5p  | NM_001199138 | NLRC4 | 1.19E-05    | CDS |
| hsa-miR-10394-5p  | NM_001199138 | NLRC4 | 0.000260618 | CDS |
| hsa-miR-10394-3p  | NM_001199138 | NLRC4 | 0.008415762 | CDS |
| hsa-miR-10395-5p  | NM_001199138 | NLRC4 | 0.000345859 | CDS |
| hsa-miR-10395-5p  | NM_001199138 | NLRC4 | 0.004588791 | CDS |
| hsa-miR-10396a-5p | NM_001199138 | NLRC4 | 1.00E-06    | CDS |
| hsa-miR-10396a-5p | NM_001199138 | NLRC4 | 0.002444199 | CDS |
| hsa-miR-10396a-3p | NM_001199138 | NLRC4 | 1.82E-06    | CDS |
| hsa-miR-10397-5p  | NM_001199138 | NLRC4 | 8.38E-06    | CDS |
| hsa-miR-10398-5p  | NM_001199138 | NLRC4 | 9.16E-05    | CDS |
| hsa-miR-10398-3p  | NM_001199138 | NLRC4 | 7.95E-06    | CDS |
| hsa-miR-10398-3p  | NM_001199138 | NLRC4 | 1.10E-08    | CDS |
| hsa-miR-10399-3p  | NM_001199138 | NLRC4 | 0.000952318 | CDS |
| hsa-miR-10399-3p  | NM_001199138 | NLRC4 | 8.68E-05    | CDS |
| hsa-miR-10399-3p  | NM_001199138 | NLRC4 | 0.000897224 | CDS |
| hsa-miR-10400-5p  | NM_001199138 | NLRC4 | 0.003651178 | CDS |
| hsa-miR-10400-5p  | NM_001199138 | NLRC4 | 0.007721901 | CDS |
| hsa-miR-10400-3p  | NM_001199138 | NLRC4 | 1.46E-05    | CDS |
| hsa-miR-10400-3p  | NM_001199138 | NLRC4 | 4.98E-06    | CDS |
| hsa-miR-10401-5p  | NM_001199138 | NLRC4 | 0.007684299 | CDS |
| hsa-miR-10401-5p  | NM_001199138 | NLRC4 | 0.000649339 | CDS |
| hsa-miR-10401-5p  | NM_001199138 | NLRC4 | 6.97E-06    | CDS |
| hsa-miR-10401-3p  | NM_001199138 | NLRC4 | 0.00013388  | CDS |
| hsa-miR-10396b-5p | NM_001199138 | NLRC4 | 1.00E-06    | CDS |
| hsa-miR-10396b-5p | NM_001199138 | NLRC4 | 0.002444199 | CDS |
| hsa-miR-10396b-3p | NM_001199138 | NLRC4 | 1.82E-06    | CDS |
| hsa-miR-10396b-3p | NM_001199138 | NLRC4 | 1.53E-05    | CDS |
| hsa-miR-10523-5p  | NM_001199138 | NLRC4 | 0.000618    | CDS |
| hsa-miR-10524-5p  | NM_001199138 | NLRC4 | 1.46E-05    | CDS |
| hsa-miR-10525-3p  | NM_001199138 | NLRC4 | 0.009164864 | CDS |
| hsa-miR-10526-3p  | NM_001199138 | NLRC4 | 0.000671559 | CDS |
| hsa-miR-10526-3p  | NM_001199138 | NLRC4 | 0.09012369  | CDS |
| hsa-miR-10527-5p  | NM_001199138 | NLRC4 | 0.004768539 | CDS |
| hsa-miR-11181-3p  | NM_001199138 | NLRC4 | 0.05553747  | CDS |
| hsa-miR-11181-3p  | NM_001199138 | NLRC4 | 0.02185333  | CDS |
| hsa-miR-11399     | NM_001199138 | NLRC4 | 0.007047336 | CDS |
| hsa-miR-11399     | NM_001199138 | NLRC4 | 0.01095107  | CDS |

|                 |              |       |             |      |
|-----------------|--------------|-------|-------------|------|
| hsa-miR-11400   | NM_001199138 | NLRC4 | 0.01626591  | CDS  |
| hsa-miR-11400   | NM_001199138 | NLRC4 | 0.006918507 | CDS  |
| hsa-miR-11401   | NM_001199138 | NLRC4 | 0.000107543 | CDS  |
| hsa-miR-3059-5p | NM_001199138 | NLRC4 | 4.27E-05    | CDS  |
| hsa-miR-3085-5p | NM_001199138 | NLRC4 | 1.28E-06    | CDS  |
| hsa-miR-3085-5p | NM_001199138 | NLRC4 | 0.000608953 | CDS  |
| hsa-miR-3085-3p | NM_001199138 | NLRC4 | 0.007691023 | CDS  |
| hsa-miR-3085-3p | NM_001199138 | NLRC4 | 5.14E-05    | CDS  |
| hsa-miR-3085-3p | NM_001199138 | NLRC4 | 2.19E-05    | 5UTR |
| hsa-miR-6529-5p | NM_001199138 | NLRC4 | 4.59E-05    | CDS  |
| hsa-miR-6529-5p | NM_001199138 | NLRC4 | 0.005514936 | CDS  |
| hsa-miR-6529-3p | NM_001199138 | NLRC4 | 3.92E-05    | CDS  |
| hsa-miR-9851-5p | NM_001199138 | NLRC4 | 0.000378314 | CDS  |
| hsa-miR-9851-5p | NM_001199138 | NLRC4 | 1.98E-07    | CDS  |
| hsa-miR-9851-5p | NM_001199138 | NLRC4 | 0.002488019 | CDS  |
| hsa-miR-9851-3p | NM_001199138 | NLRC4 | 6.98E-06    | CDS  |
| hsa-miR-9851-3p | NM_001199138 | NLRC4 | 2.27E-05    | CDS  |
| hsa-miR-9851-3p | NM_001199138 | NLRC4 | 1.39E-05    | CDS  |
| hsa-miR-12113   | NM_001199138 | NLRC4 | 0.001666469 | CDS  |
| hsa-miR-12114   | NM_001199138 | NLRC4 | 0.01804454  | CDS  |
| hsa-miR-12115   | NM_001199138 | NLRC4 | 0.02308038  | CDS  |
| hsa-miR-12115   | NM_001199138 | NLRC4 | 0.02447189  | CDS  |
| hsa-miR-12116   | NM_001199138 | NLRC4 | 4.78E-06    | CDS  |
| hsa-miR-12117   | NM_001199138 | NLRC4 | 0.000129336 | CDS  |
| hsa-miR-12118   | NM_001199138 | NLRC4 | 0.2851706   | CDS  |
| hsa-miR-12118   | NM_001199138 | NLRC4 | 0.002757107 | CDS  |
| hsa-miR-12119   | NM_001199138 | NLRC4 | 0.02352991  | CDS  |
| hsa-miR-12119   | NM_001199138 | NLRC4 | 0.01000834  | CDS  |
| hsa-miR-12120   | NM_001199138 | NLRC4 | 0.007482492 | CDS  |
| hsa-miR-12120   | NM_001199138 | NLRC4 | 1.88E-05    | CDS  |
| hsa-miR-12121   | NM_001199138 | NLRC4 | 1.85E-06    | CDS  |
| hsa-miR-12122   | NM_001199138 | NLRC4 | 0.005103181 | CDS  |
| hsa-miR-12122   | NM_001199138 | NLRC4 | 3.50E-05    | CDS  |
| hsa-miR-12122   | NM_001199138 | NLRC4 | 0.05756387  | CDS  |
| hsa-miR-12124   | NM_001199138 | NLRC4 | 0.003385126 | CDS  |
| hsa-miR-12124   | NM_001199138 | NLRC4 | 0.000598122 | CDS  |
| hsa-miR-12124   | NM_001199138 | NLRC4 | 0.001239845 | CDS  |
| hsa-miR-12125   | NM_001199138 | NLRC4 | 0.000106281 | CDS  |
| hsa-miR-12126   | NM_001199138 | NLRC4 | 9.37E-05    | 5UTR |
| hsa-miR-12126   | NM_001199138 | NLRC4 | 0.000136559 | CDS  |
| hsa-miR-12126   | NM_001199138 | NLRC4 | 0.000348202 | CDS  |
| hsa-miR-12126   | NM_001199138 | NLRC4 | 1.42E-05    | 5UTR |
| hsa-miR-12127   | NM_001199138 | NLRC4 | 0.000432941 | CDS  |
| hsa-miR-12127   | NM_001199138 | NLRC4 | 0.01367002  | CDS  |

|               |              |       |             |      |
|---------------|--------------|-------|-------------|------|
| hsa-miR-12128 | NM_001199138 | NLRC4 | 0.001394641 | CDS  |
| hsa-miR-12128 | NM_001199138 | NLRC4 | 2.67E-06    | CDS  |
| hsa-miR-12129 | NM_001199138 | NLRC4 | 0.1025644   | CDS  |
| hsa-miR-12129 | NM_001199138 | NLRC4 | 0.000517298 | CDS  |
| hsa-miR-12130 | NM_001199138 | NLRC4 | 0.000361707 | CDS  |
| hsa-miR-12131 | NM_001199138 | NLRC4 | 0.001218159 | CDS  |
| hsa-miR-12131 | NM_001199138 | NLRC4 | 0.00101605  | 5UTR |

**Table S5.Target miRNA of NLRC4 from miRNet.**

| mirnet            | mir_id          | mir_acc          | symbol | entrez | experiment  |
|-------------------|-----------------|------------------|--------|--------|-------------|
| mirnet-hsa-67992  | hsa-mir-335-5p  | MIMAT000<br>0765 | NLRC4  | 58484  | Microarray  |
| mirnet-hsa-431584 | hsa-mir-146a-5p | MIMAT000<br>0449 | NLRC4  | 58484  | Microarrays |

**Table S6.LncRNA-miRNA-mRNA for CASP4 and NLRC4.**

| ID            | Accession    | Target                    | TargetID  | Experiment |
|---------------|--------------|---------------------------|-----------|------------|
| hsa-let-7d-5p | MIMAT0000065 | ARHGAP27P1-BPTFP1-KPNA2P3 | 109286553 | CLIP-Seq   |
| hsa-let-7d-5p | MIMAT0000065 | CARMN                     | 728264    | CLIP-Seq   |
| hsa-let-7d-5p | MIMAT0000065 | CDKN2B-AS1                | 100048912 | CLIP-Seq   |
| hsa-let-7d-5p | MIMAT0000065 | DRAIC                     | 145837    | CLIP-Seq   |
| hsa-let-7d-5p | MIMAT0000065 | G2E3-AS1                  | 105370431 | CLIP-Seq   |
| hsa-let-7d-5p | MIMAT0000065 | HCG18                     | 414777    | CLIP-Seq   |
| hsa-let-7d-5p | MIMAT0000065 | HEIH                      | 100859930 | CLIP-Seq   |
| hsa-let-7d-5p | MIMAT0000065 | HEIH                      | 100859930 | CLIP-Seq   |
| hsa-let-7d-5p | MIMAT0000065 | HELLPAR                   | 101101692 | CLIP-Seq   |
| hsa-let-7d-5p | MIMAT0000065 | HOXA11-AS                 | 221883    | CLIP-Seq   |
| hsa-let-7d-5p | MIMAT0000065 | IER3-AS1                  | 105379695 | CLIP-Seq   |
| hsa-let-7d-5p | MIMAT0000065 | IQCH-AS1                  | 100506686 | CLIP-Seq   |
| hsa-let-7d-5p | MIMAT0000065 | KCNQ1OT1                  | 10984     | CLIP-Seq   |
| hsa-let-7d-5p | MIMAT0000065 | KCNQ1OT1                  | 10984     | CLIP-Seq   |
| hsa-let-7d-5p | MIMAT0000065 | KCNQ1OT1                  | 10984     | CLIP-Seq   |
| hsa-let-7d-5p | MIMAT0000065 | KCNQ1OT1                  | 10984     | CLIP-Seq   |
| hsa-let-7d-5p | MIMAT0000065 | KCNQ1OT1                  | 10984     | CLIP-Seq   |
| hsa-let-7d-5p | MIMAT0000065 | KCNQ1OT1                  | 10984     | CLIP-Seq   |
| hsa-let-7d-5p | MIMAT0000065 | LINC00265                 | 349114    | CLIP-Seq   |
| hsa-let-7d-5p | MIMAT0000065 | LINC00294                 | 283267    | CLIP-Seq   |
| hsa-let-7d-5p | MIMAT0000065 | LINC00665                 | 100506930 | CLIP-Seq   |
| hsa-let-7d-5p | MIMAT0000065 | LINC00885                 | 401109    | CLIP-Seq   |
| hsa-let-7d-5p | MIMAT0000065 | LINC00894                 | 100272228 | CLIP-Seq   |
| hsa-let-7d-5p | MIMAT0000065 | LINC00963                 | 100506190 | CLIP-Seq   |
| hsa-let-7d-5p | MIMAT0000065 | LINC01001                 | 100133161 | CLIP-Seq   |
| hsa-let-7d-5p | MIMAT0000065 | LINC01678                 | 105377138 | CLIP-Seq   |
| hsa-let-7d-5p | MIMAT0000065 | LINC01806                 | 100996579 | CLIP-Seq   |
| hsa-let-7d-5p | MIMAT0000065 | LINC01978                 | 101928738 | CLIP-Seq   |
| hsa-let-7d-5p | MIMAT0000065 | LINC02242                 | 105379006 | CLIP-Seq   |
| hsa-let-7d-5p | MIMAT0000065 | LINC02381                 | 400043    | CLIP-Seq   |
| hsa-let-7d-5p | MIMAT0000065 | LINC02432                 | 100507639 | CLIP-Seq   |
| hsa-let-7d-5p | MIMAT0000065 | LMCD1-AS1                 | 100288428 | CLIP-Seq   |
| hsa-let-7d-5p | MIMAT0000065 | MEG8                      | 79104     | CLIP-Seq   |
| hsa-let-7d-5p | MIMAT0000065 | MIR29B2CHG                | 100128537 | CLIP-Seq   |
| hsa-let-7d-5p | MIMAT0000065 | MIR99AHG                  | 388815    | CLIP-Seq   |
| hsa-let-7d-5p | MIMAT0000065 | MIRLET7BHG                | 400931    | CLIP-Seq   |
| hsa-let-7d-5p | MIMAT0000065 | MUC20-OT1                 | 111753249 | CLIP-Seq   |
| hsa-let-7d-5p | MIMAT0000065 | NEAT1                     | 283131    | CLIP-Seq   |
| hsa-let-7d-5p | MIMAT0000065 | NEAT1                     | 283131    | CLIP-Seq   |
| hsa-let-7d-5p | MIMAT0000065 | NEAT1                     | 283131    | CLIP-Seq   |
| hsa-let-7d-5p | MIMAT0000065 | NUTM2A-AS1                | 728190    | CLIP-Seq   |

|                 |              |                        |           |          |
|-----------------|--------------|------------------------|-----------|----------|
| hsa-let-7d-5p   | MIMAT0000065 | OIP5-AS1               | 729082    | CLIP-Seq |
| hsa-let-7d-5p   | MIMAT0000065 | OLMALINC               | 90271     | CLIP-Seq |
| hsa-let-7d-5p   | MIMAT0000065 | RPARP-AS1              | 100505761 | CLIP-Seq |
| hsa-let-7d-5p   | MIMAT0000065 | SLC9A3-AS1             | 100288152 | CLIP-Seq |
| hsa-let-7d-5p   | MIMAT0000065 | SNHG12                 | 85028     | CLIP-Seq |
| hsa-let-7d-5p   | MIMAT0000065 | SNHG16                 | 100507246 | CLIP-Seq |
| hsa-let-7d-5p   | MIMAT0000065 | SNHG4                  | 724102    | CLIP-Seq |
| hsa-let-7d-5p   | MIMAT0000065 | SNHG4                  | 724102    | CLIP-Seq |
| hsa-let-7d-5p   | MIMAT0000065 | SNHG4                  | 724102    | CLIP-Seq |
| hsa-let-7d-5p   | MIMAT0000065 | STAG3L5P-PVRIG2P-PILRB | 101752399 | CLIP-Seq |
| hsa-let-7d-5p   | MIMAT0000065 | THSD4-AS1              | 101929196 | CLIP-Seq |
| hsa-let-7d-5p   | MIMAT0000065 | TMEM147-AS1            | 100506469 | CLIP-Seq |
| hsa-let-7d-5p   | MIMAT0000065 | TMPO-AS1               | 100128191 | CLIP-Seq |
| hsa-let-7d-5p   | MIMAT0000065 | TRG-AS1                | 100506776 | CLIP-Seq |
| hsa-let-7d-5p   | MIMAT0000065 | TTC28-AS1              | 284900    | CLIP-Seq |
| hsa-let-7d-5p   | MIMAT0000065 | TTY15                  | 64595     | CLIP-Seq |
| hsa-let-7d-5p   | MIMAT0000065 | UBL7-AS1               | 440288    | CLIP-Seq |
| hsa-let-7d-5p   | MIMAT0000065 | VASH1-AS1              | 100506603 | CLIP-Seq |
| hsa-let-7d-5p   | MIMAT0000065 | XIST                   | 7503      | CLIP-Seq |
| hsa-let-7d-5p   | MIMAT0000065 | XIST                   | 7503      | CLIP-Seq |
| hsa-let-7d-5p   | MIMAT0000065 | XIST                   | 7503      | CLIP-Seq |
| hsa-let-7d-5p   | MIMAT0000065 | XIST                   | 7503      | CLIP-Seq |
| hsa-let-7d-5p   | MIMAT0000065 | ZNF337-AS1             | 102724826 | CLIP-Seq |
| hsa-let-7d-5p   | MIMAT0000065 | ZNF436-AS1             | 148898    | CLIP-Seq |
| hsa-let-7d-5p   | MIMAT0000065 | ZNF571-AS1             | 100507433 | CLIP-Seq |
| hsa-mir-103a-3p | MIMAT0000101 | ALMS1-IT1              | 100874291 | CLIP-Seq |
| hsa-mir-103a-3p | MIMAT0000101 | ARHGAP11B              | 89839     | CLIP-Seq |
| hsa-mir-103a-3p | MIMAT0000101 | CYTOR                  | 112597    | CLIP-Seq |
| hsa-mir-103a-3p | MIMAT0000101 | DLG1-AS1               | 100507086 | CLIP-Seq |
| hsa-mir-103a-3p | MIMAT0000101 | DLX6-AS1               | 285987    | CLIP-Seq |
| hsa-mir-103a-3p | MIMAT0000101 | DUBR                   | 344595    | CLIP-Seq |
| hsa-mir-103a-3p | MIMAT0000101 | EPHA1-AS1              | 285965    | CLIP-Seq |
| hsa-mir-103a-3p | MIMAT0000101 | FAM30A                 | 9834      | CLIP-Seq |
| hsa-mir-103a-3p | MIMAT0000101 | FGD5-AS1               | 100505641 | CLIP-Seq |
| hsa-mir-103a-3p | MIMAT0000101 | GUSBP11                | 91316     | CLIP-Seq |
| hsa-mir-103a-3p | MIMAT0000101 | H19                    | 283120    | CLIP-Seq |
| hsa-mir-103a-3p | MIMAT0000101 | HCG18                  | 414777    | CLIP-Seq |
| hsa-mir-103a-3p | MIMAT0000101 | HOTAIRM1               | 100506311 | CLIP-Seq |
| hsa-mir-103a-3p | MIMAT0000101 | KCNQ1OT1               | 10984     | CLIP-Seq |
| hsa-mir-103a-3p | MIMAT0000101 | KCNQ1OT1               | 10984     | CLIP-Seq |
| hsa-mir-103a-3p | MIMAT0000101 | KCNQ1OT1               | 10984     | CLIP-Seq |
| hsa-mir-103a-3p | MIMAT0000101 | LINC00294              | 283267    | CLIP-Seq |
| hsa-mir-103a-3p | MIMAT0000101 | LINC00630              | 100287765 | CLIP-Seq |
| hsa-mir-103a-3p | MIMAT0000101 | LINC00638              | 196872    | CLIP-Seq |

|                 |              |                        |           |          |
|-----------------|--------------|------------------------|-----------|----------|
| hsa-mir-103a-3p | MIMAT0000101 | LINC00641              | 283624    | CLIP-Seq |
| hsa-mir-103a-3p | MIMAT0000101 | LINC00662              | 148189    | CLIP-Seq |
| hsa-mir-103a-3p | MIMAT0000101 | LINC00662              | 148189    | CLIP-Seq |
| hsa-mir-103a-3p | MIMAT0000101 | LINC00707              | 100507127 | CLIP-Seq |
| hsa-mir-103a-3p | MIMAT0000101 | LINC00960              | 401074    | CLIP-Seq |
| hsa-mir-103a-3p | MIMAT0000101 | LINC01134              | 100133612 | CLIP-Seq |
| hsa-mir-103a-3p | MIMAT0000101 | LINC01343              | 339442    | CLIP-Seq |
| hsa-mir-103a-3p | MIMAT0000101 | LINC01569              | 100507501 | CLIP-Seq |
| hsa-mir-103a-3p | MIMAT0000101 | LINC01848              | 100289673 | CLIP-Seq |
| hsa-mir-103a-3p | MIMAT0000101 | LINC02035              | 100129550 | CLIP-Seq |
| hsa-mir-103a-3p | MIMAT0000101 | LINC02434              | 105377606 | CLIP-Seq |
| hsa-mir-103a-3p | MIMAT0000101 | LIPE-AS1               | 100996307 | CLIP-Seq |
| hsa-mir-103a-3p | MIMAT0000101 | MEG8                   | 79104     | CLIP-Seq |
| hsa-mir-103a-3p | MIMAT0000101 | MIR181A1HG             | 100131234 | CLIP-Seq |
| hsa-mir-103a-3p | MIMAT0000101 | MIR29B2CHG             | 100128537 | CLIP-Seq |
| hsa-mir-103a-3p | MIMAT0000101 | MIR503HG               | 84848     | CLIP-Seq |
| hsa-mir-103a-3p | MIMAT0000101 | NEAT1                  | 283131    | CLIP-Seq |
| hsa-mir-103a-3p | MIMAT0000101 | NFIA-AS2               | 100996570 | CLIP-Seq |
| hsa-mir-103a-3p | MIMAT0000101 | NUTM2A-AS1             | 728190    | CLIP-Seq |
| hsa-mir-103a-3p | MIMAT0000101 | NUTM2A-AS1             | 728190    | CLIP-Seq |
| hsa-mir-103a-3p | MIMAT0000101 | NUTM2B-AS1             | 101060691 | CLIP-Seq |
| hsa-mir-103a-3p | MIMAT0000101 | PAX8-AS1               | 654433    | CLIP-Seq |
| hsa-mir-103a-3p | MIMAT0000101 | PCAT18                 | 728606    | CLIP-Seq |
| hsa-mir-103a-3p | MIMAT0000101 | PCBP1-AS1              | 400960    | CLIP-Seq |
| hsa-mir-103a-3p | MIMAT0000101 | PSMA3-AS1              | 379025    | CLIP-Seq |
| hsa-mir-103a-3p | MIMAT0000101 | RNF139-AS1             | 101927612 | CLIP-Seq |
| hsa-mir-103a-3p | MIMAT0000101 | RPARP-AS1              | 100505761 | CLIP-Seq |
| hsa-mir-103a-3p | MIMAT0000101 | RRN3P2                 | 653390    | CLIP-Seq |
| hsa-mir-103a-3p | MIMAT0000101 | SLC9A3-AS1             | 100288152 | CLIP-Seq |
| hsa-mir-103a-3p | MIMAT0000101 | SNHG26                 | 109729180 | CLIP-Seq |
| hsa-mir-103a-3p | MIMAT0000101 | STAG3L5P-PVRIG2P-PILRB | 101752399 | CLIP-Seq |
| hsa-mir-103a-3p | MIMAT0000101 | STAG3L5P-PVRIG2P-PILRB | 101752399 | CLIP-Seq |
| hsa-mir-103a-3p | MIMAT0000101 | TEX41                  | 401014    | CLIP-Seq |
| hsa-mir-103a-3p | MIMAT0000101 | TMEM147-AS1            | 100506469 | CLIP-Seq |
| hsa-mir-103a-3p | MIMAT0000101 | TRPM2-AS               | 101928607 | CLIP-Seq |
| hsa-mir-103a-3p | MIMAT0000101 | TTC28-AS1              | 284900    | CLIP-Seq |
| hsa-mir-103a-3p | MIMAT0000101 | TTN-AS1                | 100506866 | CLIP-Seq |
| hsa-mir-103a-3p | MIMAT0000101 | TTN-AS1                | 100506866 | CLIP-Seq |
| hsa-mir-103a-3p | MIMAT0000101 | XIST                   | 7503      | CLIP-Seq |
| hsa-mir-103a-3p | MIMAT0000101 | ZNF793-AS1             | 101927720 | CLIP-Seq |
| hsa-mir-122-5p  | MIMAT0000421 | ACVR2B-AS1             | 100128640 | CLIP-Seq |
| hsa-mir-122-5p  | MIMAT0000421 | AP4B1-AS1              | 100287722 | CLIP-Seq |
| hsa-mir-122-5p  | MIMAT0000421 | ASB16-AS1              | 339201    | CLIP-Seq |
| hsa-mir-122-5p  | MIMAT0000421 | C5orf17                | 439936    | CLIP-Seq |

|                |              |             |           |          |
|----------------|--------------|-------------|-----------|----------|
| hsa-mir-122-5p | MIMAT0000421 | C8orf31     | 286122    | CLIP-Seq |
| hsa-mir-122-5p | MIMAT0000421 | CDKN2B-AS1  | 100048912 | CLIP-Seq |
| hsa-mir-122-5p | MIMAT0000421 | DIO3OS      | 64150     | CLIP-Seq |
| hsa-mir-122-5p | MIMAT0000421 | DRAIC       | 145837    | CLIP-Seq |
| hsa-mir-122-5p | MIMAT0000421 | DRAIC       | 145837    | CLIP-Seq |
| hsa-mir-122-5p | MIMAT0000421 | DSCAM-AS1   | 100506492 | CLIP-Seq |
| hsa-mir-122-5p | MIMAT0000421 | GABPB1-AS1  | 100129387 | CLIP-Seq |
| hsa-mir-122-5p | MIMAT0000421 | GUSBP11     | 91316     | CLIP-Seq |
| hsa-mir-122-5p | MIMAT0000421 | KCNMB2-AS1  | 104797538 | CLIP-Seq |
| hsa-mir-122-5p | MIMAT0000421 | KCNQ1OT1    | 10984     | CLIP-Seq |
| hsa-mir-122-5p | MIMAT0000421 | KCNQ1OT1    | 10984     | CLIP-Seq |
| hsa-mir-122-5p | MIMAT0000421 | KCNQ1OT1    | 10984     | CLIP-Seq |
| hsa-mir-122-5p | MIMAT0000421 | LINC00205   | 642852    | CLIP-Seq |
| hsa-mir-122-5p | MIMAT0000421 | LINC00294   | 283267    | CLIP-Seq |
| hsa-mir-122-5p | MIMAT0000421 | LINC00909   | 400657    | CLIP-Seq |
| hsa-mir-122-5p | MIMAT0000421 | LINC01018   | 255167    | CLIP-Seq |
| hsa-mir-122-5p | MIMAT0000421 | LINC01126   | 100129726 | CLIP-Seq |
| hsa-mir-122-5p | MIMAT0000421 | LINC01132   | 100506810 | CLIP-Seq |
| hsa-mir-122-5p | MIMAT0000421 | LINC01140   | 339524    | CLIP-Seq |
| hsa-mir-122-5p | MIMAT0000421 | LINC01232   | 102725509 | CLIP-Seq |
| hsa-mir-122-5p | MIMAT0000421 | LINC01270   | 284751    | CLIP-Seq |
| hsa-mir-122-5p | MIMAT0000421 | LINC01278   | 92249     | CLIP-Seq |
| hsa-mir-122-5p | MIMAT0000421 | LINC02128   | 107983964 | CLIP-Seq |
| hsa-mir-122-5p | MIMAT0000421 | LINC02193   | 105371423 | CLIP-Seq |
| hsa-mir-122-5p | MIMAT0000421 | LINC02362   | 102723766 | CLIP-Seq |
| hsa-mir-122-5p | MIMAT0000421 | LINC02568   | 102723344 | CLIP-Seq |
| hsa-mir-122-5p | MIMAT0000421 | MIR205HG    | 642587    | CLIP-Seq |
| hsa-mir-122-5p | MIMAT0000421 | MIR3179-2   | 100422886 | CLIP-Seq |
| hsa-mir-122-5p | MIMAT0000421 | MMP25-AS1   | 100507419 | CLIP-Seq |
| hsa-mir-122-5p | MIMAT0000421 | NEAT1       | 283131    | CLIP-Seq |
| hsa-mir-122-5p | MIMAT0000421 | NEAT1       | 283131    | CLIP-Seq |
| hsa-mir-122-5p | MIMAT0000421 | NEAT1       | 283131    | CLIP-Seq |
| hsa-mir-122-5p | MIMAT0000421 | NEAT1       | 283131    | CLIP-Seq |
| hsa-mir-122-5p | MIMAT0000421 | NEAT1       | 283131    | CLIP-Seq |
| hsa-mir-122-5p | MIMAT0000421 | NUTM2B-AS1  | 101060691 | CLIP-Seq |
| hsa-mir-122-5p | MIMAT0000421 | PCBP1-AS1   | 400960    | CLIP-Seq |
| hsa-mir-122-5p | MIMAT0000421 | PPP1R26-AS1 | 100506599 | CLIP-Seq |
| hsa-mir-122-5p | MIMAT0000421 | PSMG3-AS1   | 114796    | CLIP-Seq |
| hsa-mir-122-5p | MIMAT0000421 | SNHG11      | 128439    | CLIP-Seq |
| hsa-mir-122-5p | MIMAT0000421 | SNHG7       | 84973     | CLIP-Seq |
| hsa-mir-122-5p | MIMAT0000421 | ST7-OT4     | 338069    | CLIP-Seq |
| hsa-mir-122-5p | MIMAT0000421 | TSPEAR-AS2  | 114043    | CLIP-Seq |
| hsa-mir-122-5p | MIMAT0000421 | USP3-AS1    | 100130855 | CLIP-Seq |
| hsa-mir-122-5p | MIMAT0000421 | XIST        | 7503      | CLIP-Seq |



|                 |              |              |           |          |
|-----------------|--------------|--------------|-----------|----------|
| hsa-mir-122-5p  | MIMAT0000421 | XIST         | 7503      | CLIP-Seq |
| hsa-mir-122-5p  | MIMAT0000421 | XXYLT1-AS2   | 101410543 | CLIP-Seq |
| hsa-mir-122-5p  | MIMAT0000421 | ZNF337-AS1   | 102724826 | CLIP-Seq |
| hsa-mir-133a-3p | MIMAT0000427 | AGAP11       | 119385    | CLIP-Seq |
| hsa-mir-133a-3p | MIMAT0000427 | DLEU1        | 10301     | CLIP-Seq |
| hsa-mir-133a-3p | MIMAT0000427 | FGD5-AS1     | 100505641 | CLIP-Seq |
| hsa-mir-133a-3p | MIMAT0000427 | HCG18        | 414777    | CLIP-Seq |
| hsa-mir-133a-3p | MIMAT0000427 | KCNMA1-AS1   | 101929328 | CLIP-Seq |
| hsa-mir-133a-3p | MIMAT0000427 | KCNQ1OT1     | 10984     | CLIP-Seq |
| hsa-mir-133a-3p | MIMAT0000427 | LHX5-AS1     | 104355219 | CLIP-Seq |
| hsa-mir-133a-3p | MIMAT0000427 | LINC00847    | 729678    | CLIP-Seq |
| hsa-mir-133a-3p | MIMAT0000427 | LINC01278    | 92249     | CLIP-Seq |
| hsa-mir-133a-3p | MIMAT0000427 | LINC01995    | 105374244 | CLIP-Seq |
| hsa-mir-133a-3p | MIMAT0000427 | LINC02381    | 400043    | CLIP-Seq |
| hsa-mir-133a-3p | MIMAT0000427 | LINC02432    | 100507639 | CLIP-Seq |
| hsa-mir-133a-3p | MIMAT0000427 | LINC02538    | 401286    | CLIP-Seq |
| hsa-mir-133a-3p | MIMAT0000427 | MCM3AP-AS1   | 114044    | CLIP-Seq |
| hsa-mir-133a-3p | MIMAT0000427 | MIR4697HG    | 283174    | CLIP-Seq |
| hsa-mir-133a-3p | MIMAT0000427 | NEAT1        | 283131    | CLIP-Seq |
| hsa-mir-133a-3p | MIMAT0000427 | NOPI4-AS1    | 317648    | CLIP-Seq |
| hsa-mir-133a-3p | MIMAT0000427 | TMEM147-AS1  | 100506469 | CLIP-Seq |
| hsa-mir-133a-3p | MIMAT0000427 | ZEB1-AS1     | 220930    | CLIP-Seq |
| hsa-mir-146a-5p | MIMAT0000449 | AZIN1-AS1    | 100506753 | CLIP-Seq |
| hsa-mir-146a-5p | MIMAT0000449 | CASC9        | 101805492 | CLIP-Seq |
| hsa-mir-146a-5p | MIMAT0000449 | CCDC183-AS1  | 100131193 | CLIP-Seq |
| hsa-mir-146a-5p | MIMAT0000449 | CRNDE        | 643911    | CLIP-Seq |
| hsa-mir-146a-5p | MIMAT0000449 | EBLN3P       | 100506710 | CLIP-Seq |
| hsa-mir-146a-5p | MIMAT0000449 | EPB41L4A-AS1 | 114915    | CLIP-Seq |
| hsa-mir-146a-5p | MIMAT0000449 | FAM201A      | 158228    | CLIP-Seq |
| hsa-mir-146a-5p | MIMAT0000449 | HCG18        | 414777    | CLIP-Seq |
| hsa-mir-146a-5p | MIMAT0000449 | HCG18        | 414777    | CLIP-Seq |
| hsa-mir-146a-5p | MIMAT0000449 | ITPKB-IT1    | 100506443 | CLIP-Seq |
| hsa-mir-146a-5p | MIMAT0000449 | KCNQ1OT1     | 10984     | CLIP-Seq |
| hsa-mir-146a-5p | MIMAT0000449 | KCNQ1OT1     | 10984     | CLIP-Seq |
| hsa-mir-146a-5p | MIMAT0000449 | KCNQ1OT1     | 10984     | CLIP-Seq |
| hsa-mir-146a-5p | MIMAT0000449 | LINC00115    | 79854     | CLIP-Seq |
| hsa-mir-146a-5p | MIMAT0000449 | LINC00567    | 283486    | CLIP-Seq |
| hsa-mir-146a-5p | MIMAT0000449 | LINC00665    | 100506930 | CLIP-Seq |
| hsa-mir-146a-5p | MIMAT0000449 | LINC00847    | 729678    | CLIP-Seq |
| hsa-mir-146a-5p | MIMAT0000449 | LINC00963    | 100506190 | CLIP-Seq |
| hsa-mir-146a-5p | MIMAT0000449 | LINC01176    | 100506516 | CLIP-Seq |
| hsa-mir-146a-5p | MIMAT0000449 | LINC01311    | 100652736 | CLIP-Seq |
| hsa-mir-146a-5p | MIMAT0000449 | LINC01535    | 101927667 | CLIP-Seq |
| hsa-mir-146a-5p | MIMAT0000449 | LINC02288    | 283575    | CLIP-Seq |

|                 |              |                        |           |          |
|-----------------|--------------|------------------------|-----------|----------|
| hsa-mir-146a-5p | MIMAT0000449 | LINC02538              | 401286    | CLIP-Seq |
| hsa-mir-146a-5p | MIMAT0000449 | MALAT1                 | 378938    | CLIP-Seq |
| hsa-mir-146a-5p | MIMAT0000449 | MINCR                  | 100507316 | CLIP-Seq |
| hsa-mir-146a-5p | MIMAT0000449 | MIR100HG               | 399959    | CLIP-Seq |
| hsa-mir-146a-5p | MIMAT0000449 | MIR137HG               | 400765    | CLIP-Seq |
| hsa-mir-146a-5p | MIMAT0000449 | MIR181A1HG             | 100131234 | CLIP-Seq |
| hsa-mir-146a-5p | MIMAT0000449 | MIR29B2CHG             | 100128537 | CLIP-Seq |
| hsa-mir-146a-5p | MIMAT0000449 | MIR4453HG              | 54553     | CLIP-Seq |
| hsa-mir-146a-5p | MIMAT0000449 | NEAT1                  | 283131    | CLIP-Seq |
| hsa-mir-146a-5p | MIMAT0000449 | NEAT1                  | 283131    | CLIP-Seq |
| hsa-mir-146a-5p | MIMAT0000449 | OLMALINC               | 90271     | CLIP-Seq |
| hsa-mir-146a-5p | MIMAT0000449 | SLC25A21-AS1           | 100129794 | CLIP-Seq |
| hsa-mir-146a-5p | MIMAT0000449 | SNHG16                 | 100507246 | CLIP-Seq |
| hsa-mir-146a-5p | MIMAT0000449 | SNHG7                  | 84973     | CLIP-Seq |
| hsa-mir-146a-5p | MIMAT0000449 | STAG3L5P-PVRIG2P-PILRB | 101752399 | CLIP-Seq |
| hsa-mir-146a-5p | MIMAT0000449 | TBX2-AS1               | 103689912 | CLIP-Seq |
| hsa-mir-146a-5p | MIMAT0000449 | TMEM161B-AS1           | 100505894 | CLIP-Seq |
| hsa-mir-146a-5p | MIMAT0000449 | XIST                   | 7503      | CLIP-Seq |
| hsa-mir-146a-5p | MIMAT0000449 | ZNF213-AS1             | 100507458 | CLIP-Seq |
| hsa-mir-146a-5p | MIMAT0000449 | ZNF337-AS1             | 102724826 | CLIP-Seq |
| hsa-mir-146a-5p | MIMAT0000449 | ZNF337-AS1             | 102724826 | CLIP-Seq |
| hsa-mir-146a-5p | MIMAT0000449 | ZNF710-AS1             | 109729181 | CLIP-Seq |
| hsa-mir-146a-5p | MIMAT0000449 | ZSCAN16-AS1            | 100129195 | CLIP-Seq |
| hsa-mir-146a-5p | MIMAT0000449 | ZSCAN16-AS1            | 100129195 | CLIP-Seq |
| hsa-mir-193a-5p | MIMAT0004614 | ARRDC1-AS1             | 85026     | CLIP-Seq |
| hsa-mir-193a-5p | MIMAT0004614 | AZIN1-AS1              | 100506753 | CLIP-Seq |
| hsa-mir-193a-5p | MIMAT0004614 | C1RL-AS1               | 283314    | CLIP-Seq |
| hsa-mir-193a-5p | MIMAT0004614 | DUXAP8                 | 503637    | CLIP-Seq |
| hsa-mir-193a-5p | MIMAT0004614 | EBLN3P                 | 100506710 | CLIP-Seq |
| hsa-mir-193a-5p | MIMAT0004614 | FBXL19-AS1             | 283932    | CLIP-Seq |
| hsa-mir-193a-5p | MIMAT0004614 | HEIH                   | 100859930 | CLIP-Seq |
| hsa-mir-193a-5p | MIMAT0004614 | KCNQ1OT1               | 10984     | CLIP-Seq |
| hsa-mir-193a-5p | MIMAT0004614 | KCNQ1OT1               | 10984     | CLIP-Seq |
| hsa-mir-193a-5p | MIMAT0004614 | LINC00205              | 642852    | CLIP-Seq |
| hsa-mir-193a-5p | MIMAT0004614 | LINC00294              | 283267    | CLIP-Seq |
| hsa-mir-193a-5p | MIMAT0004614 | LINC00685              | 283981    | CLIP-Seq |
| hsa-mir-193a-5p | MIMAT0004614 | LINC00685              | 283981    | CLIP-Seq |
| hsa-mir-193a-5p | MIMAT0004614 | LINC00885              | 401109    | CLIP-Seq |
| hsa-mir-193a-5p | MIMAT0004614 | LINC00963              | 100506190 | CLIP-Seq |
| hsa-mir-193a-5p | MIMAT0004614 | LINC01018              | 255167    | CLIP-Seq |
| hsa-mir-193a-5p | MIMAT0004614 | LINC01224              | 104472717 | CLIP-Seq |
| hsa-mir-193a-5p | MIMAT0004614 | LINC01278              | 92249     | CLIP-Seq |
| hsa-mir-193a-5p | MIMAT0004614 | LINC01311              | 100652736 | CLIP-Seq |
| hsa-mir-193a-5p | MIMAT0004614 | LINC01569              | 100507501 | CLIP-Seq |

|                 |              |              |           |          |
|-----------------|--------------|--------------|-----------|----------|
| hsa-mir-193a-5p | MIMAT0004614 | LINC01578    | 100507217 | CLIP-Seq |
| hsa-mir-193a-5p | MIMAT0004614 | LINC01588    | 283551    | CLIP-Seq |
| hsa-mir-193a-5p | MIMAT0004614 | LINC01842    | 101928845 | CLIP-Seq |
| hsa-mir-193a-5p | MIMAT0004614 | LINC02027    | 728290    | CLIP-Seq |
| hsa-mir-193a-5p | MIMAT0004614 | MCM3AP-AS1   | 114044    | CLIP-Seq |
| hsa-mir-193a-5p | MIMAT0004614 | MZF1-AS1     | 100131691 | CLIP-Seq |
| hsa-mir-193a-5p | MIMAT0004614 | NUTM2B-AS1   | 101060691 | CLIP-Seq |
| hsa-mir-193a-5p | MIMAT0004614 | OIP5-AS1     | 729082    | CLIP-Seq |
| hsa-mir-193a-5p | MIMAT0004614 | PEG13        | 359809    | CLIP-Seq |
| hsa-mir-193a-5p | MIMAT0004614 | PVT1         | 5820      | CLIP-Seq |
| hsa-mir-193a-5p | MIMAT0004614 | RORA-AS1     | 101928784 | CLIP-Seq |
| hsa-mir-193a-5p | MIMAT0004614 | SLC25A21-AS1 | 100129794 | CLIP-Seq |
| hsa-mir-193a-5p | MIMAT0004614 | SNAI3-AS1    | 197187    | CLIP-Seq |
| hsa-mir-193a-5p | MIMAT0004614 | SNHG1        | 23642     | CLIP-Seq |
| hsa-mir-193a-5p | MIMAT0004614 | SNHG11       | 128439    | CLIP-Seq |
| hsa-mir-193a-5p | MIMAT0004614 | SNHG16       | 100507246 | CLIP-Seq |
| hsa-mir-193a-5p | MIMAT0004614 | SNHG20       | 654434    | CLIP-Seq |
| hsa-mir-193a-5p | MIMAT0004614 | SNHG7        | 84973     | CLIP-Seq |
| hsa-mir-193a-5p | MIMAT0004614 | TEN1-CDK3    | 100529145 | CLIP-Seq |
| hsa-mir-193a-5p | MIMAT0004614 | TTN-AS1      | 100506866 | CLIP-Seq |
| hsa-mir-193a-5p | MIMAT0004614 | XIST         | 7503      | CLIP-Seq |
| hsa-mir-193a-5p | MIMAT0004614 | XIST         | 7503      | CLIP-Seq |
| hsa-mir-193a-5p | MIMAT0004614 | XIST         | 7503      | CLIP-Seq |
| hsa-mir-193a-5p | MIMAT0004614 | XIST         | 7503      | CLIP-Seq |
| hsa-mir-193a-5p | MIMAT0004614 | XIST         | 7503      | CLIP-Seq |
| hsa-mir-193a-5p | MIMAT0004614 | XIST         | 7503      | CLIP-Seq |
| hsa-mir-193a-5p | MIMAT0004614 | XIST         | 7503      | CLIP-Seq |
| hsa-mir-193a-5p | MIMAT0004614 | XIST         | 7503      | CLIP-Seq |
| hsa-mir-210-3p  | MIMAT0000267 | FAM157C      | 100996541 | CLIP-Seq |
| hsa-mir-210-3p  | MIMAT0000267 | KCNQ1OT1     | 10984     | CLIP-Seq |
| hsa-mir-210-3p  | MIMAT0000267 | LAMTOR5-AS1  | 101410535 | CLIP-Seq |
| hsa-mir-210-3p  | MIMAT0000267 | LINC00473    | 90632     | CLIP-Seq |
| hsa-mir-210-3p  | MIMAT0000267 | LINC00899    | 100271722 | CLIP-Seq |
| hsa-mir-210-3p  | MIMAT0000267 | LINC01011    | 401232    | CLIP-Seq |
| hsa-mir-210-3p  | MIMAT0000267 | LINC01355    | 100996511 | CLIP-Seq |
| hsa-mir-210-3p  | MIMAT0000267 | LINC01743    | 255654    | CLIP-Seq |
| hsa-mir-210-3p  | MIMAT0000267 | PAXIP1-AS1   | 202781    | CLIP-Seq |
| hsa-mir-210-3p  | MIMAT0000267 | PSMG3-AS1    | 114796    | CLIP-Seq |
| hsa-mir-210-3p  | MIMAT0000267 | SCARNA9      | 619383    | CLIP-Seq |
| hsa-mir-210-3p  | MIMAT0000267 | SGO1-AS1     | 100874028 | CLIP-Seq |
| hsa-mir-210-3p  | MIMAT0000267 | STARD13-IT1  | 100874373 | CLIP-Seq |
| hsa-mir-23b-3p  | MIMAT0000418 | DLEU2        | 8847      | CLIP-Seq |
| hsa-mir-23b-3p  | MIMAT0000418 | DNAJC27-AS1  | 729723    | CLIP-Seq |
| hsa-mir-23b-3p  | MIMAT0000418 | GABPB1-AS1   | 100129387 | CLIP-Seq |

|                |              |             |           |          |
|----------------|--------------|-------------|-----------|----------|
| hsa-mir-23b-3p | MIMAT0000418 | GAS5        | 60674     | CLIP-Seq |
| hsa-mir-23b-3p | MIMAT0000418 | KTN1-AS1    | 100129075 | CLIP-Seq |
| hsa-mir-23b-3p | MIMAT0000418 | LAMTOR5-AS1 | 101410535 | CLIP-Seq |
| hsa-mir-23b-3p | MIMAT0000418 | LINC00173   | 100287569 | CLIP-Seq |
| hsa-mir-23b-3p | MIMAT0000418 | LINC00261   | 140828    | CLIP-Seq |
| hsa-mir-23b-3p | MIMAT0000418 | LINC00472   | 79940     | CLIP-Seq |
| hsa-mir-23b-3p | MIMAT0000418 | LINC00473   | 90632     | CLIP-Seq |
| hsa-mir-23b-3p | MIMAT0000418 | LINC00909   | 400657    | CLIP-Seq |
| hsa-mir-23b-3p | MIMAT0000418 | LINC00943   | 100507206 | CLIP-Seq |
| hsa-mir-23b-3p | MIMAT0000418 | LINC01122   | 400955    | CLIP-Seq |
| hsa-mir-23b-3p | MIMAT0000418 | LINC01485   | 101928154 | CLIP-Seq |
| hsa-mir-23b-3p | MIMAT0000418 | LINC01550   | 388011    | CLIP-Seq |
| hsa-mir-23b-3p | MIMAT0000418 | LINC01579   | 283682    | CLIP-Seq |
| hsa-mir-23b-3p | MIMAT0000418 | LINC01727   | 101929625 | CLIP-Seq |
| hsa-mir-23b-3p | MIMAT0000418 | LINC01876   | 101929378 | CLIP-Seq |
| hsa-mir-23b-3p | MIMAT0000418 | LINC01963   | 150967    | CLIP-Seq |
| hsa-mir-23b-3p | MIMAT0000418 | LINC01995   | 105374244 | CLIP-Seq |
| hsa-mir-23b-3p | MIMAT0000418 | LINC02035   | 100129550 | CLIP-Seq |
| hsa-mir-23b-3p | MIMAT0000418 | LINC02035   | 100129550 | CLIP-Seq |
| hsa-mir-23b-3p | MIMAT0000418 | MAGI2-AS3   | 100505881 | CLIP-Seq |
| hsa-mir-23b-3p | MIMAT0000418 | MALAT1      | 378938    | CLIP-Seq |
| hsa-mir-23b-3p | MIMAT0000418 | MALAT1      | 378938    | CLIP-Seq |
| hsa-mir-23b-3p | MIMAT0000418 | MALINC1     | 100505636 | CLIP-Seq |
| hsa-mir-23b-3p | MIMAT0000418 | MCM3AP-AS1  | 114044    | CLIP-Seq |
| hsa-mir-23b-3p | MIMAT0000418 | MCM3AP-AS1  | 114044    | CLIP-Seq |
| hsa-mir-23b-3p | MIMAT0000418 | MEG3        | 55384     | CLIP-Seq |
| hsa-mir-23b-3p | MIMAT0000418 | MEG8        | 79104     | CLIP-Seq |
| hsa-mir-23b-3p | MIMAT0000418 | MIR4453HG   | 54553     | CLIP-Seq |
| hsa-mir-23b-3p | MIMAT0000418 | MSC-AS1     | 100132891 | CLIP-Seq |
| hsa-mir-23b-3p | MIMAT0000418 | N4BP2L2-IT2 | 116828    | CLIP-Seq |
| hsa-mir-23b-3p | MIMAT0000418 | NEAT1       | 283131    | CLIP-Seq |
| hsa-mir-23b-3p | MIMAT0000418 | NEAT1       | 283131    | CLIP-Seq |
| hsa-mir-23b-3p | MIMAT0000418 | NEAT1       | 283131    | CLIP-Seq |
| hsa-mir-23b-3p | MIMAT0000418 | NEAT1       | 283131    | CLIP-Seq |
| hsa-mir-23b-3p | MIMAT0000418 | NUTM2B-AS1  | 101060691 | CLIP-Seq |
| hsa-mir-23b-3p | MIMAT0000418 | OIP5-AS1    | 729082    | CLIP-Seq |
| hsa-mir-23b-3p | MIMAT0000418 | OLMALINC    | 90271     | CLIP-Seq |
| hsa-mir-23b-3p | MIMAT0000418 | PARD6G-AS1  | 100130522 | CLIP-Seq |
| hsa-mir-23b-3p | MIMAT0000418 | PARD6G-AS1  | 100130522 | CLIP-Seq |
| hsa-mir-23b-3p | MIMAT0000418 | PTPRG-AS1   | 100506994 | CLIP-Seq |
| hsa-mir-23b-3p | MIMAT0000418 | PVT1        | 5820      | CLIP-Seq |
| hsa-mir-23b-3p | MIMAT0000418 | SNHG1       | 23642     | CLIP-Seq |
| hsa-mir-23b-3p | MIMAT0000418 | SNHG16      | 100507246 | CLIP-Seq |
| hsa-mir-23b-3p | MIMAT0000418 | SNHG17      | 388796    | CLIP-Seq |

|                |              |                        |           |          |
|----------------|--------------|------------------------|-----------|----------|
| hsa-mir-23b-3p | MIMAT0000418 | SNHG5                  | 387066    | CLIP-Seq |
| hsa-mir-23b-3p | MIMAT0000418 | ST7-OT4                | 338069    | CLIP-Seq |
| hsa-mir-23b-3p | MIMAT0000418 | STAG3L5P-PVRIG2P-PILRB | 101752399 | CLIP-Seq |
| hsa-mir-23b-3p | MIMAT0000418 | THRB-IT1               | 100874274 | CLIP-Seq |
| hsa-mir-23b-3p | MIMAT0000418 | THUMPD3-AS1            | 440944    | CLIP-Seq |
| hsa-mir-23b-3p | MIMAT0000418 | THUMPD3-AS1            | 440944    | CLIP-Seq |
| hsa-mir-23b-3p | MIMAT0000418 | TOB1-AS1               | 400604    | CLIP-Seq |
| hsa-mir-23b-3p | MIMAT0000418 | TOB1-AS1               | 400604    | CLIP-Seq |
| hsa-mir-23b-3p | MIMAT0000418 | TRAF3IP2-AS1           | 643749    | CLIP-Seq |
| hsa-mir-23b-3p | MIMAT0000418 | TRG-AS1                | 100506776 | CLIP-Seq |
| hsa-mir-23b-3p | MIMAT0000418 | TTN-AS1                | 100506866 | CLIP-Seq |
| hsa-mir-23b-3p | MIMAT0000418 | TYMSOS                 | 494514    | CLIP-Seq |
| hsa-mir-23b-3p | MIMAT0000418 | VPS9D1-AS1             | 100128881 | CLIP-Seq |
| hsa-mir-23b-3p | MIMAT0000418 | XIST                   | 7503      | CLIP-Seq |
| hsa-mir-23b-3p | MIMAT0000418 | XIST                   | 7503      | CLIP-Seq |
| hsa-mir-23b-3p | MIMAT0000418 | XIST                   | 7503      | CLIP-Seq |
| hsa-mir-23b-3p | MIMAT0000418 | XIST                   | 7503      | CLIP-Seq |
| hsa-mir-23b-3p | MIMAT0000418 | ZEB1-AS1               | 220930    | CLIP-Seq |
| hsa-mir-23b-3p | MIMAT0000418 | ZMIZ1-AS1              | 283050    | CLIP-Seq |
| hsa-mir-23b-3p | MIMAT0000418 | ZNF674-AS1             | 401588    | CLIP-Seq |
| hsa-mir-23b-3p | MIMAT0000418 | ZNF674-AS1             | 401588    | CLIP-Seq |
| hsa-mir-23b-3p | MIMAT0000418 | ZSCAN16-AS1            | 100129195 | CLIP-Seq |
| hsa-mir-30a-5p | MIMAT0000087 | ACAP2-IT1              | 100874306 | CLIP-Seq |
| hsa-mir-30a-5p | MIMAT0000087 | C10orf25               | 220979    | CLIP-Seq |
| hsa-mir-30a-5p | MIMAT0000087 | DLEU2                  | 8847      | CLIP-Seq |
| hsa-mir-30a-5p | MIMAT0000087 | DNAAF4-CCPG1           | 100533483 | CLIP-Seq |
| hsa-mir-30a-5p | MIMAT0000087 | DNMBP-AS1              | 100188954 | CLIP-Seq |
| hsa-mir-30a-5p | MIMAT0000087 | DNMBP-AS1              | 100188954 | CLIP-Seq |
| hsa-mir-30a-5p | MIMAT0000087 | EPB41L4A-AS1           | 114915    | CLIP-Seq |
| hsa-mir-30a-5p | MIMAT0000087 | GACAT2                 | 100287082 | CLIP-Seq |
| hsa-mir-30a-5p | MIMAT0000087 | GATA3-AS1              | 399717    | CLIP-Seq |
| hsa-mir-30a-5p | MIMAT0000087 | GUSBP11                | 91316     | CLIP-Seq |
| hsa-mir-30a-5p | MIMAT0000087 | HCG18                  | 414777    | CLIP-Seq |
| hsa-mir-30a-5p | MIMAT0000087 | HCG18                  | 414777    | CLIP-Seq |
| hsa-mir-30a-5p | MIMAT0000087 | HELLPAR                | 101101692 | CLIP-Seq |
| hsa-mir-30a-5p | MIMAT0000087 | HELLPAR                | 101101692 | CLIP-Seq |
| hsa-mir-30a-5p | MIMAT0000087 | HELLPAR                | 101101692 | CLIP-Seq |
| hsa-mir-30a-5p | MIMAT0000087 | IQCH-AS1               | 100506686 | CLIP-Seq |
| hsa-mir-30a-5p | MIMAT0000087 | KCNQ1OT1               | 10984     | CLIP-Seq |
| hsa-mir-30a-5p | MIMAT0000087 | KRTAP5-AS1             | 338651    | CLIP-Seq |
| hsa-mir-30a-5p | MIMAT0000087 | LIFR-AS1               | 100506495 | CLIP-Seq |
| hsa-mir-30a-5p | MIMAT0000087 | LINC00261              | 140828    | CLIP-Seq |
| hsa-mir-30a-5p | MIMAT0000087 | LINC00707              | 100507127 | CLIP-Seq |
| hsa-mir-30a-5p | MIMAT0000087 | LINC00899              | 100271722 | CLIP-Seq |

|                |              |                  |           |          |
|----------------|--------------|------------------|-----------|----------|
| hsa-mir-30a-5p | MIMAT0000087 | LINC00921        | 283876    | CLIP-Seq |
| hsa-mir-30a-5p | MIMAT0000087 | LINC01089        | 338799    | CLIP-Seq |
| hsa-mir-30a-5p | MIMAT0000087 | LINC01133        | 100505633 | CLIP-Seq |
| hsa-mir-30a-5p | MIMAT0000087 | LINC01139        | 339535    | CLIP-Seq |
| hsa-mir-30a-5p | MIMAT0000087 | LINC01355        | 100996511 | CLIP-Seq |
| hsa-mir-30a-5p | MIMAT0000087 | LINC02535        | 101928820 | CLIP-Seq |
| hsa-mir-30a-5p | MIMAT0000087 | MALAT1           | 378938    | CLIP-Seq |
| hsa-mir-30a-5p | MIMAT0000087 | MAPKAPK5-AS1     | 51275     | CLIP-Seq |
| hsa-mir-30a-5p | MIMAT0000087 | NEAT1            | 283131    | CLIP-Seq |
| hsa-mir-30a-5p | MIMAT0000087 | NEAT1            | 283131    | CLIP-Seq |
| hsa-mir-30a-5p | MIMAT0000087 | NOP14-AS1        | 317648    | CLIP-Seq |
| hsa-mir-30a-5p | MIMAT0000087 | NORAD            | 647979    | CLIP-Seq |
| hsa-mir-30a-5p | MIMAT0000087 | NUTM2B-AS1       | 101060691 | CLIP-Seq |
| hsa-mir-30a-5p | MIMAT0000087 | OIP5-AS1         | 729082    | CLIP-Seq |
| hsa-mir-30a-5p | MIMAT0000087 | OIP5-AS1         | 729082    | CLIP-Seq |
| hsa-mir-30a-5p | MIMAT0000087 | OIP5-AS1         | 729082    | CLIP-Seq |
| hsa-mir-30a-5p | MIMAT0000087 | OIP5-AS1         | 729082    | CLIP-Seq |
| hsa-mir-30a-5p | MIMAT0000087 | PAX8-AS1         | 654433    | CLIP-Seq |
| hsa-mir-30a-5p | MIMAT0000087 | PCF11-AS1        | 106736475 | CLIP-Seq |
| hsa-mir-30a-5p | MIMAT0000087 | PSMA3-AS1        | 379025    | CLIP-Seq |
| hsa-mir-30a-5p | MIMAT0000087 | PTOV1-AS1        | 100506033 | CLIP-Seq |
| hsa-mir-30a-5p | MIMAT0000087 | PVT1             | 5820      | CLIP-Seq |
| hsa-mir-30a-5p | MIMAT0000087 | PVT1             | 5820      | CLIP-Seq |
| hsa-mir-30a-5p | MIMAT0000087 | PVT1             | 5820      | CLIP-Seq |
| hsa-mir-30a-5p | MIMAT0000087 | PWAR5            | 8123      | CLIP-Seq |
| hsa-mir-30a-5p | MIMAT0000087 | RAB11B-AS1       | 100507567 | CLIP-Seq |
| hsa-mir-30a-5p | MIMAT0000087 | SLC26A4-AS1      | 286002    | CLIP-Seq |
| hsa-mir-30a-5p | MIMAT0000087 | SNHG16           | 100507246 | CLIP-Seq |
| hsa-mir-30a-5p | MIMAT0000087 | SOX9-AS1         | 400618    | CLIP-Seq |
| hsa-mir-30a-5p | MIMAT0000087 | ST20-AS1         | 283687    | CLIP-Seq |
| hsa-mir-30a-5p | MIMAT0000087 | TBC1D3P1-DHX40P1 | 653645    | CLIP-Seq |
| hsa-mir-30a-5p | MIMAT0000087 | TMEM147-AS1      | 100506469 | CLIP-Seq |
| hsa-mir-30a-5p | MIMAT0000087 | XIST             | 7503      | CLIP-Seq |
| hsa-mir-30a-5p | MIMAT0000087 | XIST             | 7503      | CLIP-Seq |
| hsa-mir-30a-5p | MIMAT0000087 | ZNF571-AS1       | 100507433 | CLIP-Seq |
| hsa-mir-30d-5p | MIMAT0000245 | ACAP2-IT1        | 100874306 | CLIP-Seq |
| hsa-mir-30d-5p | MIMAT0000245 | C10orf25         | 220979    | CLIP-Seq |
| hsa-mir-30d-5p | MIMAT0000245 | DLEU2            | 8847      | CLIP-Seq |
| hsa-mir-30d-5p | MIMAT0000245 | DNAAF4-CCPG1     | 100533483 | CLIP-Seq |
| hsa-mir-30d-5p | MIMAT0000245 | DNMBP-AS1        | 100188954 | CLIP-Seq |
| hsa-mir-30d-5p | MIMAT0000245 | DNMBP-AS1        | 100188954 | CLIP-Seq |
| hsa-mir-30d-5p | MIMAT0000245 | EPB41L4A-AS1     | 114915    | CLIP-Seq |
| hsa-mir-30d-5p | MIMAT0000245 | GACAT2           | 100287082 | CLIP-Seq |
| hsa-mir-30d-5p | MIMAT0000245 | GATA3-AS1        | 399717    | CLIP-Seq |

|                |              |                  |           |          |
|----------------|--------------|------------------|-----------|----------|
| hsa-mir-30d-5p | MIMAT0000245 | GUSBP11          | 91316     | CLIP-Seq |
| hsa-mir-30d-5p | MIMAT0000245 | HCG18            | 414777    | CLIP-Seq |
| hsa-mir-30d-5p | MIMAT0000245 | HCG18            | 414777    | CLIP-Seq |
| hsa-mir-30d-5p | MIMAT0000245 | HELLPAR          | 101101692 | CLIP-Seq |
| hsa-mir-30d-5p | MIMAT0000245 | HELLPAR          | 101101692 | CLIP-Seq |
| hsa-mir-30d-5p | MIMAT0000245 | HELLPAR          | 101101692 | CLIP-Seq |
| hsa-mir-30d-5p | MIMAT0000245 | IQCH-AS1         | 100506686 | CLIP-Seq |
| hsa-mir-30d-5p | MIMAT0000245 | KCNQ1OT1         | 10984     | CLIP-Seq |
| hsa-mir-30d-5p | MIMAT0000245 | KRTAP5-AS1       | 338651    | CLIP-Seq |
| hsa-mir-30d-5p | MIMAT0000245 | LIFR-AS1         | 100506495 | CLIP-Seq |
| hsa-mir-30d-5p | MIMAT0000245 | LINC00261        | 140828    | CLIP-Seq |
| hsa-mir-30d-5p | MIMAT0000245 | LINC00707        | 100507127 | CLIP-Seq |
| hsa-mir-30d-5p | MIMAT0000245 | LINC00899        | 100271722 | CLIP-Seq |
| hsa-mir-30d-5p | MIMAT0000245 | LINC00921        | 283876    | CLIP-Seq |
| hsa-mir-30d-5p | MIMAT0000245 | LINC01089        | 338799    | CLIP-Seq |
| hsa-mir-30d-5p | MIMAT0000245 | LINC01133        | 100505633 | CLIP-Seq |
| hsa-mir-30d-5p | MIMAT0000245 | LINC01139        | 339535    | CLIP-Seq |
| hsa-mir-30d-5p | MIMAT0000245 | LINC01355        | 100996511 | CLIP-Seq |
| hsa-mir-30d-5p | MIMAT0000245 | LINC02535        | 101928820 | CLIP-Seq |
| hsa-mir-30d-5p | MIMAT0000245 | MALAT1           | 378938    | CLIP-Seq |
| hsa-mir-30d-5p | MIMAT0000245 | MAPKAPK5-AS1     | 51275     | CLIP-Seq |
| hsa-mir-30d-5p | MIMAT0000245 | NEAT1            | 283131    | CLIP-Seq |
| hsa-mir-30d-5p | MIMAT0000245 | NEAT1            | 283131    | CLIP-Seq |
| hsa-mir-30d-5p | MIMAT0000245 | NOP14-AS1        | 317648    | CLIP-Seq |
| hsa-mir-30d-5p | MIMAT0000245 | NORAD            | 647979    | CLIP-Seq |
| hsa-mir-30d-5p | MIMAT0000245 | NUTM2B-AS1       | 101060691 | CLIP-Seq |
| hsa-mir-30d-5p | MIMAT0000245 | OIP5-AS1         | 729082    | CLIP-Seq |
| hsa-mir-30d-5p | MIMAT0000245 | OIP5-AS1         | 729082    | CLIP-Seq |
| hsa-mir-30d-5p | MIMAT0000245 | OIP5-AS1         | 729082    | CLIP-Seq |
| hsa-mir-30d-5p | MIMAT0000245 | OIP5-AS1         | 729082    | CLIP-Seq |
| hsa-mir-30d-5p | MIMAT0000245 | PAX8-AS1         | 654433    | CLIP-Seq |
| hsa-mir-30d-5p | MIMAT0000245 | PCF11-AS1        | 106736475 | CLIP-Seq |
| hsa-mir-30d-5p | MIMAT0000245 | PSMA3-AS1        | 379025    | CLIP-Seq |
| hsa-mir-30d-5p | MIMAT0000245 | PTOV1-AS1        | 100506033 | CLIP-Seq |
| hsa-mir-30d-5p | MIMAT0000245 | PVT1             | 5820      | CLIP-Seq |
| hsa-mir-30d-5p | MIMAT0000245 | PVT1             | 5820      | CLIP-Seq |
| hsa-mir-30d-5p | MIMAT0000245 | PWAR5            | 8123      | CLIP-Seq |
| hsa-mir-30d-5p | MIMAT0000245 | RAB11B-AS1       | 100507567 | CLIP-Seq |
| hsa-mir-30d-5p | MIMAT0000245 | SLC26A4-AS1      | 286002    | CLIP-Seq |
| hsa-mir-30d-5p | MIMAT0000245 | SNHG16           | 100507246 | CLIP-Seq |
| hsa-mir-30d-5p | MIMAT0000245 | SOX9-AS1         | 400618    | CLIP-Seq |
| hsa-mir-30d-5p | MIMAT0000245 | ST20-AS1         | 283687    | CLIP-Seq |
| hsa-mir-30d-5p | MIMAT0000245 | TBC1D3P1-DHX40P1 | 653645    | CLIP-Seq |
| hsa-mir-30d-5p | MIMAT0000245 | TMEM147-AS1      | 100506469 | CLIP-Seq |

|                |              |              |           |          |
|----------------|--------------|--------------|-----------|----------|
| hsa-mir-30d-5p | MIMAT0000245 | XIST         | 7503      | CLIP-Seq |
| hsa-mir-30d-5p | MIMAT0000245 | XIST         | 7503      | CLIP-Seq |
| hsa-mir-30d-5p | MIMAT0000245 | ZNF571-AS1   | 100507433 | CLIP-Seq |
| hsa-mir-30e-5p | MIMAT0000692 | ACAP2-IT1    | 100874306 | CLIP-Seq |
| hsa-mir-30e-5p | MIMAT0000692 | C10orf25     | 220979    | CLIP-Seq |
| hsa-mir-30e-5p | MIMAT0000692 | DLEU2        | 8847      | CLIP-Seq |
| hsa-mir-30e-5p | MIMAT0000692 | DNAAF4-CCPG1 | 100533483 | CLIP-Seq |
| hsa-mir-30e-5p | MIMAT0000692 | DNMBP-AS1    | 100188954 | CLIP-Seq |
| hsa-mir-30e-5p | MIMAT0000692 | DNMBP-AS1    | 100188954 | CLIP-Seq |
| hsa-mir-30e-5p | MIMAT0000692 | EPB41L4A-AS1 | 114915    | CLIP-Seq |
| hsa-mir-30e-5p | MIMAT0000692 | GACAT2       | 100287082 | CLIP-Seq |
| hsa-mir-30e-5p | MIMAT0000692 | GATA3-AS1    | 399717    | CLIP-Seq |
| hsa-mir-30e-5p | MIMAT0000692 | GUSBP11      | 91316     | CLIP-Seq |
| hsa-mir-30e-5p | MIMAT0000692 | HCG18        | 414777    | CLIP-Seq |
| hsa-mir-30e-5p | MIMAT0000692 | HCG18        | 414777    | CLIP-Seq |
| hsa-mir-30e-5p | MIMAT0000692 | HELLPAR      | 101101692 | CLIP-Seq |
| hsa-mir-30e-5p | MIMAT0000692 | HELLPAR      | 101101692 | CLIP-Seq |
| hsa-mir-30e-5p | MIMAT0000692 | HELLPAR      | 101101692 | CLIP-Seq |
| hsa-mir-30e-5p | MIMAT0000692 | IQCH-AS1     | 100506686 | CLIP-Seq |
| hsa-mir-30e-5p | MIMAT0000692 | KCNQ1OT1     | 10984     | CLIP-Seq |
| hsa-mir-30e-5p | MIMAT0000692 | KRTAP5-AS1   | 338651    | CLIP-Seq |
| hsa-mir-30e-5p | MIMAT0000692 | LIFR-AS1     | 100506495 | CLIP-Seq |
| hsa-mir-30e-5p | MIMAT0000692 | LINC00261    | 140828    | CLIP-Seq |
| hsa-mir-30e-5p | MIMAT0000692 | LINC00707    | 100507127 | CLIP-Seq |
| hsa-mir-30e-5p | MIMAT0000692 | LINC00899    | 100271722 | CLIP-Seq |
| hsa-mir-30e-5p | MIMAT0000692 | LINC00921    | 283876    | CLIP-Seq |
| hsa-mir-30e-5p | MIMAT0000692 | LINC01089    | 338799    | CLIP-Seq |
| hsa-mir-30e-5p | MIMAT0000692 | LINC01133    | 100505633 | CLIP-Seq |
| hsa-mir-30e-5p | MIMAT0000692 | LINC01139    | 339535    | CLIP-Seq |
| hsa-mir-30e-5p | MIMAT0000692 | LINC01355    | 100996511 | CLIP-Seq |
| hsa-mir-30e-5p | MIMAT0000692 | LINC02535    | 101928820 | CLIP-Seq |
| hsa-mir-30e-5p | MIMAT0000692 | MALAT1       | 378938    | CLIP-Seq |
| hsa-mir-30e-5p | MIMAT0000692 | MAPKAPK5-AS1 | 51275     | CLIP-Seq |
| hsa-mir-30e-5p | MIMAT0000692 | NEAT1        | 283131    | CLIP-Seq |
| hsa-mir-30e-5p | MIMAT0000692 | NEAT1        | 283131    | CLIP-Seq |
| hsa-mir-30e-5p | MIMAT0000692 | NOP14-AS1    | 317648    | CLIP-Seq |
| hsa-mir-30e-5p | MIMAT0000692 | NORAD        | 647979    | CLIP-Seq |
| hsa-mir-30e-5p | MIMAT0000692 | NUTM2B-AS1   | 101060691 | CLIP-Seq |
| hsa-mir-30e-5p | MIMAT0000692 | OIP5-AS1     | 729082    | CLIP-Seq |
| hsa-mir-30e-5p | MIMAT0000692 | OIP5-AS1     | 729082    | CLIP-Seq |
| hsa-mir-30e-5p | MIMAT0000692 | OIP5-AS1     | 729082    | CLIP-Seq |
| hsa-mir-30e-5p | MIMAT0000692 | OIP5-AS1     | 729082    | CLIP-Seq |
| hsa-mir-30e-5p | MIMAT0000692 | PAX8-AS1     | 654433    | CLIP-Seq |
| hsa-mir-30e-5p | MIMAT0000692 | PCF11-AS1    | 106736475 | CLIP-Seq |



|                |              |                  |           |          |
|----------------|--------------|------------------|-----------|----------|
| hsa-mir-30e-5p | MIMAT0000692 | PSMA3-AS1        | 379025    | CLIP-Seq |
| hsa-mir-30e-5p | MIMAT0000692 | PTOV1-AS1        | 100506033 | CLIP-Seq |
| hsa-mir-30e-5p | MIMAT0000692 | PVT1             | 5820      | CLIP-Seq |
| hsa-mir-30e-5p | MIMAT0000692 | PVT1             | 5820      | CLIP-Seq |
| hsa-mir-30e-5p | MIMAT0000692 | PWAR5            | 8123      | CLIP-Seq |
| hsa-mir-30e-5p | MIMAT0000692 | RAB11B-AS1       | 100507567 | CLIP-Seq |
| hsa-mir-30e-5p | MIMAT0000692 | SLC26A4-AS1      | 286002    | CLIP-Seq |
| hsa-mir-30e-5p | MIMAT0000692 | SNHG16           | 100507246 | CLIP-Seq |
| hsa-mir-30e-5p | MIMAT0000692 | SOX9-AS1         | 400618    | CLIP-Seq |
| hsa-mir-30e-5p | MIMAT0000692 | ST20-AS1         | 283687    | CLIP-Seq |
| hsa-mir-30e-5p | MIMAT0000692 | TBC1D3P1-DHX40P1 | 653645    | CLIP-Seq |
| hsa-mir-30e-5p | MIMAT0000692 | TMEM147-AS1      | 100506469 | CLIP-Seq |
| hsa-mir-30e-5p | MIMAT0000692 | XIST             | 7503      | CLIP-Seq |
| hsa-mir-30e-5p | MIMAT0000692 | XIST             | 7503      | CLIP-Seq |
| hsa-mir-30e-5p | MIMAT0000692 | ZNF571-AS1       | 100507433 | CLIP-Seq |
| hsa-mir-335-5p | MIMAT0000765 | DANCR            | 57291     | CLIP-Seq |
| hsa-mir-335-5p | MIMAT0000765 | FTX              | 100302692 | CLIP-Seq |
| hsa-mir-335-5p | MIMAT0000765 | FTX              | 100302692 | CLIP-Seq |
| hsa-mir-335-5p | MIMAT0000765 | GAS5             | 60674     | CLIP-Seq |
| hsa-mir-335-5p | MIMAT0000765 | KCNQ1OT1         | 10984     | CLIP-Seq |
| hsa-mir-335-5p | MIMAT0000765 | KCNQ1OT1         | 10984     | CLIP-Seq |
| hsa-mir-335-5p | MIMAT0000765 | KCNQ1OT1         | 10984     | CLIP-Seq |
| hsa-mir-335-5p | MIMAT0000765 | KCNQ1OT1         | 10984     | CLIP-Seq |
| hsa-mir-335-5p | MIMAT0000765 | KCNQ1OT1         | 10984     | CLIP-Seq |
| hsa-mir-335-5p | MIMAT0000765 | LINC00294        | 283267    | CLIP-Seq |
| hsa-mir-335-5p | MIMAT0000765 | LINC00630        | 100287765 | CLIP-Seq |
| hsa-mir-335-5p | MIMAT0000765 | LINC00886        | 730091    | CLIP-Seq |
| hsa-mir-335-5p | MIMAT0000765 | LINC00893        | 100131434 | CLIP-Seq |
| hsa-mir-335-5p | MIMAT0000765 | LINC00941        | 100287314 | CLIP-Seq |
| hsa-mir-335-5p | MIMAT0000765 | LINC00943        | 100507206 | CLIP-Seq |
| hsa-mir-335-5p | MIMAT0000765 | LINC01087        | 101927994 | CLIP-Seq |
| hsa-mir-335-5p | MIMAT0000765 | LINC01090        | 104355152 | CLIP-Seq |
| hsa-mir-335-5p | MIMAT0000765 | LINC01503        | 100506119 | CLIP-Seq |
| hsa-mir-335-5p | MIMAT0000765 | LPP-AS2          | 339929    | CLIP-Seq |
| hsa-mir-335-5p | MIMAT0000765 | MAPT-IT1         | 100130148 | CLIP-Seq |
| hsa-mir-335-5p | MIMAT0000765 | MIR29B2CHG       | 100128537 | CLIP-Seq |
| hsa-mir-335-5p | MIMAT0000765 | NEAT1            | 283131    | CLIP-Seq |
| hsa-mir-335-5p | MIMAT0000765 | NEAT1            | 283131    | CLIP-Seq |
| hsa-mir-335-5p | MIMAT0000765 | OIP5-AS1         | 729082    | CLIP-Seq |
| hsa-mir-335-5p | MIMAT0000765 | PAX8-AS1         | 654433    | CLIP-Seq |
| hsa-mir-335-5p | MIMAT0000765 | PAXIP1-AS1       | 202781    | CLIP-Seq |
| hsa-mir-335-5p | MIMAT0000765 | RUNDC3A-AS1      | 101926996 | CLIP-Seq |
| hsa-mir-335-5p | MIMAT0000765 | SLFNL1-AS1       | 100507178 | CLIP-Seq |
| hsa-mir-335-5p | MIMAT0000765 | SNHG17           | 388796    | CLIP-Seq |

|                |              |              |           |          |
|----------------|--------------|--------------|-----------|----------|
| hsa-mir-335-5p | MIMAT0000765 | SNHG20       | 654434    | CLIP-Seq |
| hsa-mir-335-5p | MIMAT0000765 | SNHG8        | 100093630 | CLIP-Seq |
| hsa-mir-335-5p | MIMAT0000765 | THAP9-AS1    | 100499177 | CLIP-Seq |
| hsa-mir-335-5p | MIMAT0000765 | TMEM161B-AS1 | 100505894 | CLIP-Seq |
| hsa-mir-335-5p | MIMAT0000765 | TNRC6C-AS1   | 100131096 | CLIP-Seq |
| hsa-mir-335-5p | MIMAT0000765 | TSPEAR-AS2   | 114043    | CLIP-Seq |
| hsa-mir-335-5p | MIMAT0000765 | TUG1         | 55000     | CLIP-Seq |
| hsa-mir-335-5p | MIMAT0000765 | UBR5-AS1     | 101927221 | CLIP-Seq |
| hsa-mir-335-5p | MIMAT0000765 | URB1-AS1     | 84996     | CLIP-Seq |
| hsa-mir-335-5p | MIMAT0000765 | XIST         | 7503      | CLIP-Seq |
| hsa-mir-335-5p | MIMAT0000765 | XIST         | 7503      | CLIP-Seq |
| hsa-mir-335-5p | MIMAT0000765 | ZEB1-AS1     | 220930    | CLIP-Seq |
| hsa-mir-671-5p | MIMAT0003880 | ADIRF-AS1    | 100133190 | CLIP-Seq |
| hsa-mir-671-5p | MIMAT0003880 | ASB16-AS1    | 339201    | CLIP-Seq |
| hsa-mir-671-5p | MIMAT0003880 | C10orf25     | 220979    | CLIP-Seq |
| hsa-mir-671-5p | MIMAT0003880 | CASC8        | 727677    | CLIP-Seq |
| hsa-mir-671-5p | MIMAT0003880 | CD27-AS1     | 678655    | CLIP-Seq |
| hsa-mir-671-5p | MIMAT0003880 | DANT2        | 642776    | CLIP-Seq |
| hsa-mir-671-5p | MIMAT0003880 | DLEU1        | 10301     | CLIP-Seq |
| hsa-mir-671-5p | MIMAT0003880 | FZD10-AS1    | 440119    | CLIP-Seq |
| hsa-mir-671-5p | MIMAT0003880 | H19          | 283120    | CLIP-Seq |
| hsa-mir-671-5p | MIMAT0003880 | HLCS-IT1     | 100874294 | CLIP-Seq |
| hsa-mir-671-5p | MIMAT0003880 | ITGA9-AS1    | 101928153 | CLIP-Seq |
| hsa-mir-671-5p | MIMAT0003880 | KCNQ1OT1     | 10984     | CLIP-Seq |
| hsa-mir-671-5p | MIMAT0003880 | KCNQ1OT1     | 10984     | CLIP-Seq |
| hsa-mir-671-5p | MIMAT0003880 | KCNQ1OT1     | 10984     | CLIP-Seq |
| hsa-mir-671-5p | MIMAT0003880 | LINC00346    | 283487    | CLIP-Seq |
| hsa-mir-671-5p | MIMAT0003880 | LINC00473    | 90632     | CLIP-Seq |
| hsa-mir-671-5p | MIMAT0003880 | LINC00511    | 400619    | CLIP-Seq |
| hsa-mir-671-5p | MIMAT0003880 | LINC00667    | 339290    | CLIP-Seq |
| hsa-mir-671-5p | MIMAT0003880 | LINC00852    | 84657     | CLIP-Seq |
| hsa-mir-671-5p | MIMAT0003880 | LINC00858    | 170425    | CLIP-Seq |
| hsa-mir-671-5p | MIMAT0003880 | LINC00885    | 401109    | CLIP-Seq |
| hsa-mir-671-5p | MIMAT0003880 | LINC00943    | 100507206 | CLIP-Seq |
| hsa-mir-671-5p | MIMAT0003880 | LINC00963    | 100506190 | CLIP-Seq |
| hsa-mir-671-5p | MIMAT0003880 | LINC01006    | 100506380 | CLIP-Seq |
| hsa-mir-671-5p | MIMAT0003880 | LINC01278    | 92249     | CLIP-Seq |
| hsa-mir-671-5p | MIMAT0003880 | LINC01391    | 103344930 | CLIP-Seq |
| hsa-mir-671-5p | MIMAT0003880 | LINC01521    | 54944     | CLIP-Seq |
| hsa-mir-671-5p | MIMAT0003880 | LINC01521    | 54944     | CLIP-Seq |
| hsa-mir-671-5p | MIMAT0003880 | LINC02344    | 105370154 | CLIP-Seq |
| hsa-mir-671-5p | MIMAT0003880 | MAPT-IT1     | 100130148 | CLIP-Seq |
| hsa-mir-671-5p | MIMAT0003880 | MIR181A1HG   | 100131234 | CLIP-Seq |
| hsa-mir-671-5p | MIMAT0003880 | MIR29B2CHG   | 100128537 | CLIP-Seq |

|                |              |                        |           |          |
|----------------|--------------|------------------------|-----------|----------|
| hsa-mir-671-5p | MIMAT0003880 | MIR29B2CHG             | 100128537 | CLIP-Seq |
| hsa-mir-671-5p | MIMAT0003880 | MIR34AHG               | 106614088 | CLIP-Seq |
| hsa-mir-671-5p | MIMAT0003880 | MIR4458HG              | 100505738 | CLIP-Seq |
| hsa-mir-671-5p | MIMAT0003880 | MIR503HG               | 84848     | CLIP-Seq |
| hsa-mir-671-5p | MIMAT0003880 | N4BP2L2-IT2            | 116828    | CLIP-Seq |
| hsa-mir-671-5p | MIMAT0003880 | NEAT1                  | 283131    | CLIP-Seq |
| hsa-mir-671-5p | MIMAT0003880 | NUTM2B-AS1             | 101060691 | CLIP-Seq |
| hsa-mir-671-5p | MIMAT0003880 | PAX8-AS1               | 654433    | CLIP-Seq |
| hsa-mir-671-5p | MIMAT0003880 | PTPRG-AS1              | 100506994 | CLIP-Seq |
| hsa-mir-671-5p | MIMAT0003880 | PURPL                  | 643401    | CLIP-Seq |
| hsa-mir-671-5p | MIMAT0003880 | RPARP-AS1              | 100505761 | CLIP-Seq |
| hsa-mir-671-5p | MIMAT0003880 | SDCBP2-AS1             | 100507495 | CLIP-Seq |
| hsa-mir-671-5p | MIMAT0003880 | SENCR                  | 100507392 | CLIP-Seq |
| hsa-mir-671-5p | MIMAT0003880 | SND1-IT1               | 27099     | CLIP-Seq |
| hsa-mir-671-5p | MIMAT0003880 | SNHG16                 | 100507246 | CLIP-Seq |
| hsa-mir-671-5p | MIMAT0003880 | SPAG5-AS1              | 100506436 | CLIP-Seq |
| hsa-mir-671-5p | MIMAT0003880 | STAG3L5P-PVRIG2P-PILRB | 101752399 | CLIP-Seq |
| hsa-mir-671-5p | MIMAT0003880 | TPT1-AS1               | 100190939 | CLIP-Seq |
| hsa-mir-671-5p | MIMAT0003880 | XIST                   | 7503      | CLIP-Seq |

---
